# Supplementary material for: Functionalization of Piperidine Derivatives for the Site‐Selective and Stereoselective Synthesis of Positional Analogues of Methylphenidate
Source: PubMed Central journal article supplement — Chemistry. 2020 Mar 9;26(19):4236–41. doi: 10.1002/chem.201905773 (PMC7187323; doi:10.1002/chem.201905773), 2020-03-09
Supplement: CHEM-26-4236-s001.pdf [file CHEM-26-4236-s001.pdf]

# CHEMISTRY

## A **European** Journal

### Supporting Information

#### **Functionalization of Piperidine Derivatives for the Site-Selective and Stereoselective Synthesis of Positional Analogues of Methylphenidate**

Wenbin Liu,<sup>[a]</sup> Tobias Babl,<sup>[a, b]</sup> Alexander Röther,<sup>[b]</sup> Oliver Reiser,<sup>\*[b]</sup> and Huw M. L. Davies<sup>\*[a]</sup>

chem\_201905773\_sm\_miscellaneous\_information.pdf

## Content

|                                                                                           |            |
|-------------------------------------------------------------------------------------------|------------|
| <b>1. General Considerations</b> .....                                                    | <b>2</b>   |
| <b>2. Full Conditions Optimization Tables</b> .....                                       | <b>3</b>   |
| <b>2.1. C2 Functionalization</b> .....                                                    | <b>4</b>   |
| <b>2.2. C3 Functionalization</b> .....                                                    | <b>6</b>   |
| <b>2.3. C4 Functionalization</b> .....                                                    | <b>8</b>   |
| <b>3. Acquisition and Preparation of Compounds</b> .....                                  | <b>11</b>  |
| <b>4. C–H Insertion Reactions</b> .....                                                   | <b>17</b>  |
| <b>4.1 General Procedures</b> .....                                                       | <b>17</b>  |
| <b>5. Cyclopropanation and Ring-Opening Reactions for C3-Analogs</b> .....                | <b>42</b>  |
| <b>5.1 General Procedures</b> .....                                                       | <b>42</b>  |
| <b>5.2. Diastereomer and Enantiomer Ratios Determination</b> .....                        | <b>42</b>  |
| <b>5.3. Characterization Data for Cyclopropanation and Ring-Opening Products</b> .....    | <b>43</b>  |
| <b>6. Reference</b> .....                                                                 | <b>59</b>  |
| <b>7. Crude NMR for Diastereo- (and/or Regio-) Selectivity Determination:</b> .....       | <b>60</b>  |
| <b>8. Characterization NMR Spectra</b> .....                                              | <b>109</b> |
| <b>9. HPLC Spectra for Enantioselectivity Determination</b> .....                         | <b>173</b> |
| <b>10.1. C2 Functionalization Products</b> .....                                          | <b>173</b> |
| <b>10.2. Cyclopropanation and C3 Functionalization Products</b> .....                     | <b>226</b> |
| <b>10.3. C4 Functionalization Products</b> .....                                          | <b>263</b> |
| <b>10. X-Ray Crystallographic Data of the Products for Absolute Stereochemistry</b> ..... | <b>290</b> |
| <b>10.1. X-Ray Crystallographic Data for 6a</b> .....                                     | <b>290</b> |
| <b>10.2. X-Ray Crystallographic Data for 8b</b> .....                                     | <b>300</b> |
| <b>10.3. X-Ray Crystallographic Data for N-COCF<sub>3</sub>-9a</b> .....                  | <b>305</b> |
| <b>10.4. X-Ray Crystallographic Data for 13b</b> .....                                    | <b>315</b> |

## 1. General Considerations

All solvents for reactions were purified and dried by a *Glass Contour Solvent System* unless otherwise stated. The dichloromethane used in reactions was dried and degassed at reflux over activated 4 Å molecular sieves for 1 hours under argon, then stored with activated 4 Å molecular sieves under argon atmosphere and was used directly.

Thin layer chromatographic (TLC) analysis was performed on Kieselgel 60 F254 aluminum-backed silica plates, visualizing with UV light and/or staining with aqueous  $\text{KMnO}_4$  stain.

Flash chromatography was used for product purification and performed on a Biotage® Isolera™ device. Depending on the scale of the reactions, different sizes of columns were employed. The normal phase silica columns were purchased from RediSep® and Biotage ZIP®. Ethylacetate (EtOAc) in combination with hexanes or Methanol (MeOH) in combination with dichloromethane (DCM) was used in a certain gradient as the mobile phase.

$^1\text{H}$  and  $^{13}\text{C}$  NMR spectra were recorded at 600 MHz ( $^{13}\text{C}$  at 150 MHz) on Bruker-600 spectrometer or IVONA-600 spectrometer, or 500 MHz ( $^{13}\text{C}$  at 126 MHz) on INOVA-500 spectrometer.  $^{19}\text{F}$  NMR spectra were recorded at 565 MHz on Bruker-600 spectrometer or 283 MHz on Mercury 300. Unless otherwise stated, NMR spectra were run in solutions of deuterated chloroform ( $\text{CDCl}_3$ ) with tetramethylsilane (TMS) as an internal standard (0 ppm for  $^1\text{H}$ , and 0 ppm for  $^{13}\text{C}$ ), and were reported in parts per million (ppm). Abbreviations for signal multiplicity are as follow: s = singlet, d = doublet, t = triplet, q = quartet, m = multiplet, dd = doublet of doublet, etc. Coupling constants ( $J$  values) were calculated directly from the spectra.

IR spectra were collected on a Nicolet iS10 FT-IR spectrometer and reported in unit of  $\text{cm}^{-1}$ .

Mass spectra were taken on a Thermo Finnigan LTQ-FTMS spectrometer with APCI, ESI or NSI.

Melting points (mp) were measured in open capillary tubes with a Mel-Temp Electrothermal melting points apparatus and are uncorrected.

Optical rotations were measured on Jasco P-2000 polarimeters.

Analytical enantioselective chromatographs were measured on either Varian Prostar instrument or Agilent-1100 series instrument, and used isopropanol/hexane as gradient. Chiral HPLC conditions were determined by obtaining separation of the racemic products using  $\text{Rh}_2(\text{OAc})_4$ ,  $\text{Rh}_2(R/S\text{-DOSP})_4$  or  $\text{Rh}_2(R/S\text{-2-Cl-5-BrTPCP})_4$ .

## 2. Full Conditions Optimization Tables

Structures of the dirhodium catalysts that are relevant to this paper:

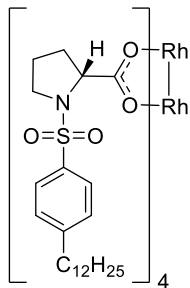

$\text{Rh}_2(\text{R-DOSP})_4$   
(Davies, *JACS*,  
**1996**, 118, 6897)

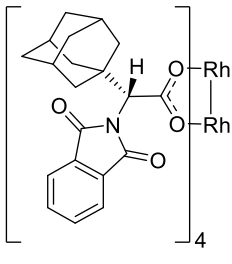

$\text{Rh}_2(\text{R-PTAD})_4$   
(Davies, *Org. Lett.*,  
**2006**, 8, 3437)

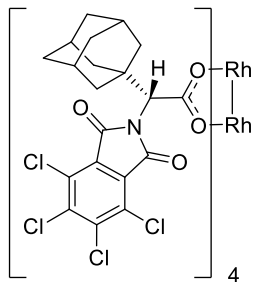

$\text{Rh}_2(\text{R-TCPTAD})_4$   
(Davies, *Org. Lett.*,  
**2006**, 8, 5013)

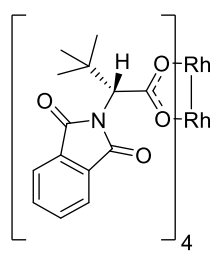

$\text{Rh}_2(\text{R-PTTL})_4$   
(Hashimoto, *Org. Lett.*,  
**2002**, 4, 3887)

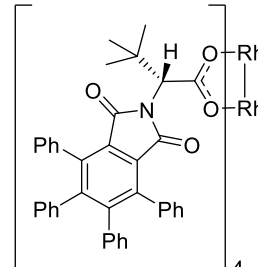

$\text{Rh}_2(\text{R-TPPTL})_4$   
(Davies, *Nature*,  
**2018**, 564, 395)

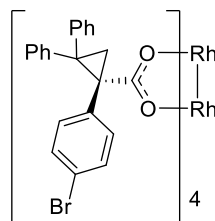

$\text{Rh}_2(\text{R-p-BrTPCP})_4$   
(Davies, *JACS*,  
**2011**, 133, 19198)

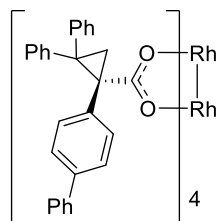

$\text{Rh}_2(\text{R-p-PhTPCP})_4$   
(Davies, *JACS*,  
**2014**, 136, 9792)

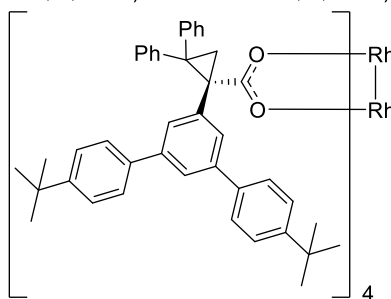

$\text{Rh}_2(\text{R-3,5-di}(p\text{-}^t\text{BuC}_6\text{H}_4)\text{TPCP})_4$   
(Davies, *Nature*,  
**2016**, 533, 230)

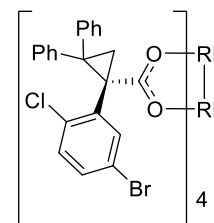

$\text{Rh}_2(\text{S-2-Cl-5-BrTPCP})_4$   
(Davies, *JACS*,  
**2018**, 140, 12247)

Structure of protecting groups:

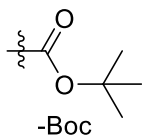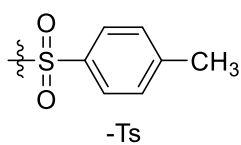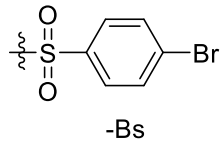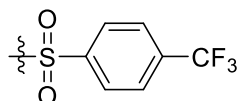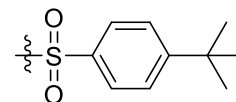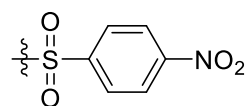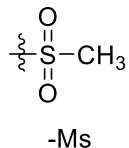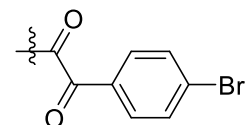

## 2.1. C2 Functionalization

**Table S1. Catalyst and Condition Optimization for C2 Functionalization (Boc-protected)<sup>a</sup>**

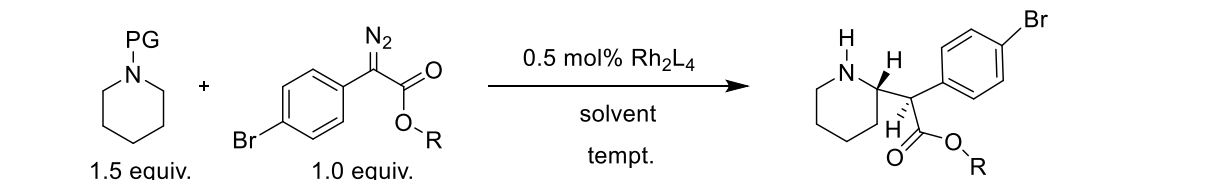

| entry | PG  | L                                                                       | R                                | solvent                         | tempt. (°C) | yield (%) <sup>b</sup> | d.r. <sup>c</sup> | ee (%) <sup>d</sup><br>(major d) | ee (%) <sup>d</sup><br>(minor d) |
|-------|-----|-------------------------------------------------------------------------|----------------------------------|---------------------------------|-------------|------------------------|-------------------|----------------------------------|----------------------------------|
| 1     | Boc | S-DOSP                                                                  | CH <sub>3</sub>                  | pentane                         | 23          | 69                     | 1.5:1             | -69%                             | -44%                             |
| 2     |     | S-DOSP                                                                  | CH <sub>3</sub>                  | CH <sub>2</sub> Cl <sub>2</sub> | 23          | 53                     | 1.1:1             | -41%                             | -29%                             |
| 3     |     | R-PTAD                                                                  | CH <sub>3</sub>                  | CH <sub>2</sub> Cl <sub>2</sub> | 23          | 62                     | 2.2:1             | -70%                             | -14%                             |
| 4     |     | R-TCPTAD                                                                | CH <sub>3</sub>                  | CH <sub>2</sub> Cl <sub>2</sub> | 23          | 69                     | 1.4:1             | 66%                              | 72%                              |
| 5     |     | R- <i>p</i> -BrTPCP                                                     | CH <sub>3</sub>                  | CH <sub>2</sub> Cl <sub>2</sub> | 23          | 41                     | 1.2:1             | 27%                              | -30%                             |
| 6     |     | R- <i>p</i> -PhTPCP                                                     | CH <sub>3</sub>                  | CH <sub>2</sub> Cl <sub>2</sub> | 23          | 40                     | 1.5:1             | 33%                              | -45%                             |
| 7     |     | R-3,5-di( <i>p</i> - <sup>t</sup> BuC <sub>6</sub> H <sub>4</sub> )TPCP | CH <sub>3</sub>                  | CH <sub>2</sub> Cl <sub>2</sub> | 23          | 55                     | 2.0:1             | 44%                              | 20%                              |
| 8     |     | S-2-Cl-5-BrTPCP                                                         | CH <sub>3</sub>                  | CH <sub>2</sub> Cl <sub>2</sub> | 23          | 83                     | 5.3:1             | 83%                              | 85%                              |
| 9     |     | R-TPPTTL                                                                | CH <sub>3</sub>                  | CH <sub>2</sub> Cl <sub>2</sub> | 23          | 69                     | 1.5:1             | 54%                              | -32%                             |
| 10    |     | R-PTTL                                                                  | CH <sub>3</sub>                  | CH <sub>2</sub> Cl <sub>2</sub> | 23          | 69                     | 2.3:1             | -69%                             | -10%                             |
| 11    | Boc | R-DOSP                                                                  | CH <sub>2</sub> CCl <sub>3</sub> | CH <sub>2</sub> Cl <sub>2</sub> | 23          | 52                     | 3.4:1             | 14%                              |                                  |
| 12    |     | R-PTAD                                                                  | CH <sub>2</sub> CCl <sub>3</sub> | CH <sub>2</sub> Cl <sub>2</sub> | 23          | 58                     | 16.4:1            | -80%                             |                                  |
| 13    |     | R-TCPTAD                                                                | CH <sub>2</sub> CCl <sub>3</sub> | CH <sub>2</sub> Cl <sub>2</sub> | 23          | 83                     | 10.5:1            | 93%                              |                                  |
| 14    |     | S-2-Cl-5-BrTPCP                                                         | CH <sub>2</sub> CCl <sub>3</sub> | CH <sub>2</sub> Cl <sub>2</sub> | 23          | 73                     | 3.6:1             | 65%                              |                                  |
| 15    |     | R-TPPTTL                                                                | CH <sub>2</sub> CCl <sub>3</sub> | CH <sub>2</sub> Cl <sub>2</sub> | 23          | 80                     | 27.0:1            | 69%                              |                                  |
| 16    |     | R-PTTL                                                                  | CH <sub>2</sub> CCl <sub>3</sub> | CH <sub>2</sub> Cl <sub>2</sub> | 23          | 78                     | 23.7:1            | -84%                             |                                  |

<sup>a</sup>Reaction condition are using general procedures with variants as indicated in the table. Results were determined on free secondary amines obtained after N-Boc deprotection by treatment of TFA. <sup>b</sup>Isolated yield of the C2-H insertion product. <sup>c</sup>Determined from crude <sup>1</sup>H-NMR. <sup>d</sup>Determined by chiral HPLC analysis of isolated product.

Variation of catalysts and conditions were examined for C–H functionalization at C2 position of N-Boc-piperidine. Using methyl diazoacetates (entry 1-10), most the dirhodium tetracarboxylate catalysts gave 1-2:1 diastereomeric ratio (d.r.), while the sterically demanding catalyst, Rh<sub>2</sub>(S-2-Cl-5-BrTPCP)<sub>4</sub>, gave highest d.r. (5.3:1, entry 8). Due to the recent advance in improving selectivity by using trichloroethyl (TCE) diazoacetates<sup>1</sup>, some of the typical catalysts were examined. The d.r. for Rh<sub>2</sub>(S-2-Cl-5-BrTPCP)<sub>4</sub>-catalyzed reaction was decreased significantly, while the phthalimido-base dirhodium catalysts gave better d.r.. The highest enantioselectivity was obtained by using Rh<sub>2</sub>(R-TCPTAD)<sub>4</sub> with good d.r. (10.5:1 d.r., 93% ee in entry 13).

Noticeably, the Rh<sub>2</sub>(R-TPPTTL)<sub>4</sub>-catalyzed reaction gave nearly single diastereomer (27:1 d.r. in entry 15), but its enantioselectivity was only moderate. Therefore, further exploration by changing the protecting group on the piperidine substrate was conducted (Table S2).

**Table S2. Catalyst and Condition Optimization for C2 Functionalization (Sulfonyl-protected)<sup>a</sup>**
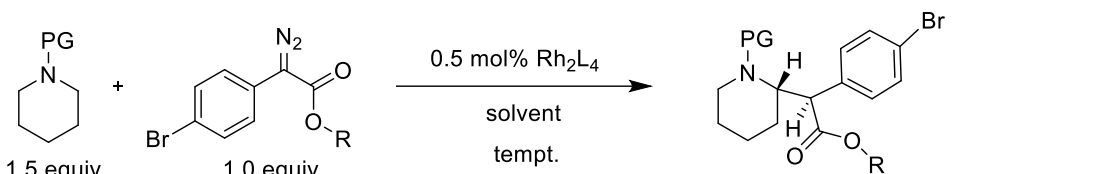

| entry | PG | L                                                                                   | R                                | solvent                         | tempt. (°C) | yield (%) <sup>b</sup>                                    | d.r. <sup>c</sup> | ee (%) <sup>d</sup> |
|-------|----|-------------------------------------------------------------------------------------|----------------------------------|---------------------------------|-------------|-----------------------------------------------------------|-------------------|---------------------|
| 1     | Ts | <i>R</i> -DOSP                                                                      | CH <sub>2</sub> CCl <sub>3</sub> | CH <sub>2</sub> Cl <sub>2</sub> | 23          | 38                                                        | 8.2:1             | 57%                 |
| 2     |    | <i>S</i> -2-Cl-5-BrTPCP                                                             | CH <sub>2</sub> CCl <sub>3</sub> | CH <sub>2</sub> Cl <sub>2</sub> | 23          | 13*                                                       | 7.3:1             | 84%                 |
|       |    |                                                                                     |                                  |                                 |             | (other C-H insertion products: @ C4 and CH <sub>3</sub> ) |                   |                     |
| 3     |    | <i>R</i> -TPPTTL                                                                    | CH <sub>2</sub> CCl <sub>3</sub> | CH <sub>2</sub> Cl <sub>2</sub> | 23          | 65                                                        | 10.2:1            | 76%                 |
| 4     | Bs | <i>R</i> -DOSP                                                                      | CH <sub>2</sub> CCl <sub>3</sub> | CH <sub>2</sub> Cl <sub>2</sub> | 23          | 61                                                        | 17.7:1            | 67%                 |
| 5     |    | <i>R</i> -DOSP                                                                      | CH <sub>2</sub> CCl <sub>3</sub> | pentane/TFT                     | 23          | 13                                                        | >30:1             | 76%                 |
| 6     |    | <i>R</i> -DOSP                                                                      | CH <sub>2</sub> CCl <sub>3</sub> | TFT                             | 23          | no C-H insertion product                                  |                   |                     |
| 7     |    | <i>R</i> -PTAD                                                                      | CH <sub>2</sub> CCl <sub>3</sub> | CH <sub>2</sub> Cl <sub>2</sub> | 23          | 67                                                        | 13.5:1            | -72%                |
| 8     |    | <i>R</i> -TCPTAD                                                                    | CH <sub>2</sub> CCl <sub>3</sub> | CH <sub>2</sub> Cl <sub>2</sub> | 23          | 75                                                        | 3.2:1             | 97%                 |
| 9     |    | <i>R</i> - <i>p</i> -BrTPCP                                                         | CH <sub>2</sub> CCl <sub>3</sub> | CH <sub>2</sub> Cl <sub>2</sub> | 23          | trace C-H insertion product in crude <sup>1</sup> H-NMR   |                   |                     |
| 10    |    | <i>R</i> - <i>p</i> -PhTPCP                                                         | CH <sub>2</sub> CCl <sub>3</sub> | CH <sub>2</sub> Cl <sub>2</sub> | 23          | trace C-H insertion product in crude <sup>1</sup> H-NMR   |                   |                     |
| 11    |    | <i>R</i> -3,5-di( <i>p</i> - <sup>t</sup> Bu<br>C <sub>6</sub> H <sub>4</sub> )TPCP | CH <sub>2</sub> CCl <sub>3</sub> | CH <sub>2</sub> Cl <sub>2</sub> | 23          | trace C-H insertion product in crude <sup>1</sup> H-NMR   |                   |                     |
| 12    |    | <i>S</i> -2-Cl-5-BrTPCP                                                             | CH <sub>2</sub> CCl <sub>3</sub> | CH <sub>2</sub> Cl <sub>2</sub> | 23          | 16*                                                       | >30:1             | 66%                 |
|       |    |                                                                                     |                                  |                                 |             | (other C-H insertion products: @ C4)                      |                   |                     |
| 13    |    | <i>R</i> -TPPTTL                                                                    | CH <sub>2</sub> CCl <sub>3</sub> | CH <sub>2</sub> Cl <sub>2</sub> | 23          | 76                                                        | >30:1             | 77%                 |
| 14    |    | <i>R</i> -PTTL                                                                      | CH <sub>2</sub> CCl <sub>3</sub> | CH <sub>2</sub> Cl <sub>2</sub> | 23          | 65                                                        | 7.1:1             | -74%                |
| 15    |    | <i>R</i> -TPPTTL                                                                    | CH <sub>2</sub> CCl <sub>3</sub> | CH <sub>2</sub> Cl <sub>2</sub> | 39          | 87                                                        | 21.5:1            | 76%                 |
| 16    |    | <i>R</i> -TPPTTL                                                                    | CH <sub>2</sub> CCl <sub>3</sub> | CH <sub>2</sub> Cl <sub>2</sub> | 0           | 42                                                        | 26.4:1            | 72%                 |

<sup>a</sup>Reaction condition are using general procedures with variants as indicated in the table. <sup>b</sup>Isolated yield of the C2-H insertion product. <sup>c</sup>Determined from crude <sup>1</sup>H-NMR. <sup>d</sup>Determined by chiral HPLC analysis of isolated product.

When the piperidine was protected by tosyl group, the standard catalyst, Rh<sub>2</sub>(*R*-DOSP)<sub>4</sub>, resulted in improved d.r. comparing to its selectivity on Boc-protected piperidine, but its yield and enantioselectivity were declined largely (entry 1). In additional, other C–H insertion products were observed in the reaction using Rh<sub>2</sub>(*S*-2-Cl-5-BrTPCP)<sub>4</sub>, in which the dirhodium carbene intermediate was reacted with the primary benzylic C–H bonds, so *p*-bromobenzenesulfonyl group was applied for further examination.

When the piperidine was protected by *p*-bromobenzenesulfonyl group, Rh<sub>2</sub>(*R*-TPPTTL)<sub>4</sub> gave highest diastereoselectivity (entry 13, >30:1 d.r.). The yield for Rh<sub>2</sub>(*R*-TPPTTL)<sub>4</sub>-catalyzed reaction could be improved using higher temperature with small decrease in diastereoselectivity (entry 15), while the lower temperature (0 °C) resulted in significant lose in yield and decreased enantioselectivity.

Noticeably, most of the triarylcyclopropanated (TPCP)-based dirhodium gave only trace amount of C–H functionalization product, while Rh<sub>2</sub>(*S*-2-Cl-5-BrTPCP)<sub>4</sub>-catalyzed reaction produced C–H functionalization product at C4 position of the piperidine in additional to the C2-products. It led to the further studies on C4 functionalization using Rh<sub>2</sub>(*S*-2-Cl-5-BrTPCP)<sub>4</sub> (Section 2.4.)

## 2.2. C3 Functionalization

Table S3. Catalyst and Condition Optimization for Cyclopropanation at C2/C3 site<sup>a</sup>

| entry | L                   | R <sup>1</sup> / R <sup>2</sup>       | solvent          | tempt. (°C) | yield (%) <sup>b</sup> | ee (%) <sup>c</sup> |
|-------|---------------------|---------------------------------------|------------------|-------------|------------------------|---------------------|
| 1     | S-DOSP              | H / CH <sub>3</sub>                   | pentane          | 23          | 83                     | 92                  |
| 2     | S-DOSP              | H / CH <sub>3</sub>                   | pentane          | 0           | 87                     | 95                  |
| 3     | S-DOSP              | H / CH <sub>3</sub>                   | pentane          | -40         | 85                     | 95                  |
| 4     | R-DOSP              | H / CH <sub>3</sub>                   | trifluorotoluene | 23          | 87                     | -79                 |
| 5     | R-DOSP              | H / CH <sub>3</sub>                   | dichloromethane  | 23          | 52                     | -71                 |
| 6     | R-DOSP              | H / CH <sub>3</sub>                   | toluene          | 23          | 76                     | -87                 |
| 7     | R-DOSP              | Br / CH <sub>2</sub> CCl <sub>3</sub> | pentane          | 23          | 70                     | -80                 |
| 8     | R-DOSP              | Br / CH <sub>3</sub>                  | pentane          | 23          | 76                     | -89                 |
| 9     | S-TCPTAD            | Br / CH <sub>3</sub>                  | pentane          | 23          | 75                     | 3                   |
| 10    | R- <i>p</i> -BrTPCP | Br / CH <sub>3</sub>                  | pentane          | 23          | 85                     | -46                 |
| 11    | S- <i>o</i> -CITPCP | Br / CH <sub>3</sub>                  | pentane          | 23          | 92                     | -33                 |
| 12    | R-PTAD              | Br / CH <sub>3</sub>                  | pentane          | 23          | 70                     | 58                  |
| 13    | S-PTTL              | Br / CH <sub>3</sub>                  | pentane          | 23          | 86                     | -43                 |
| 14    | S-TPPTTL            | Br / CH <sub>3</sub>                  | pentane          | 23          | 79                     | 5                   |
| 15    | S- <i>p</i> -BrTPCP | Br / CH <sub>3</sub>                  | dichloromethane  | 23          | 73                     | 8                   |
| 16    | R- <i>p</i> -PhTPCP | Br / CH <sub>3</sub>                  | dichloromethane  | 23          | 85                     | -30                 |
| 17    | S-2-Cl-5-BrTPCP     | Br / CH <sub>3</sub>                  | dichloromethane  | 23          | 77                     | -69                 |

<sup>a</sup>Reaction condition are using general procedures with variants as indicated in the table.

<sup>b</sup>Isolated yield of the cyclopropanation product. <sup>c</sup>Determined by chiral HPLC analysis of isolated product.

Rh<sub>2</sub>(DOSP)<sub>4</sub> gives good yields using non-polar solvents (pentane, trifluorotoluene and toluene in entry 1, 4 and 6). Remarkable decrease of the yield as well as the ee is observed with DCM as solvent (entry 5). This behavior was already observed in other reactions using Rh<sub>2</sub>(DOSP)<sub>4</sub><sup>2-3</sup>. The performance of trichloroethyl (TCE) diazoacetates<sup>1</sup> was also examine here in comparison to its methyl analog (entry 8), and decreased enantioselectivity was observed with TCE diazoacetates (80% ee in entry 7). Further examination of different dirhodium catalysts was conducted using methyl 2-(4-bromophenyl)-2-diazoacetate, and Rh<sub>2</sub>(R-DOSP)<sub>4</sub> was found unmatched for this type of cyclopropanation (76% yield and 89% ee in entry 8), while all other dirhodium catalysts tested gave 3-69% ee (entry 9-17) in either pentane or dichloromethane as solvents.

In an attempt of further enhancing the ee, the reaction was carried out at lower temperatures. Using Rh<sub>2</sub>(DOSP)<sub>4</sub> as catalyst, in combination with methyl 2-diazo-2-phenylacetate in pentane, 0 °C as well as -40 °C

gave a very good ee of 95% while the yields stayed the same. As 0 °C is easier to handle as it only takes a bath of ice in water, further reactions were carried out at 0 °C.

In order to synthesize the 3-substitued piperidines that are aim of this part of the work, the cyclopropanes had to be opened in an acid catalyzed way. According to the strategies of PilsI *et al.*,<sup>4</sup> the same reaction with the cyclopropanated piperidines as substrate. In contrast to PilsI's substrate the ring-opened product would contain two chiral centers and one of them would be affected by the enol-form during the transition state. The desired product was able to be obtained *via* Brønsted and Lewis acid catalyzed ring-openings in good to excellent yields. The Lewis acid,  $\text{BF}_3 \cdot \text{OEt}_2$ , gave yields of 95% with a good d.r. of 1:12. The ring-opening of Boc-protected substrate was then conducted using the  $\text{BF}_3 \cdot \text{OEt}_2$  condition, and the deprotection of Boc group was observed, so the reaction was extended to 2 days to ensure the full conversion.

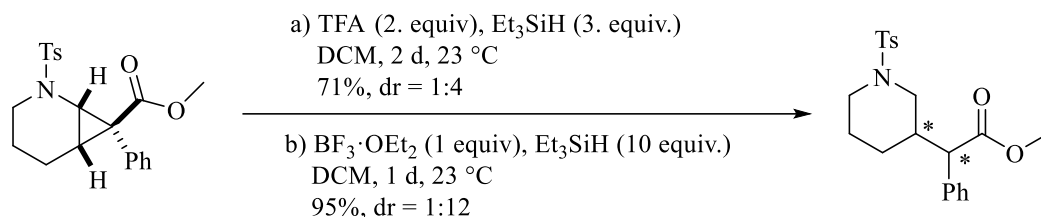

**Scheme S1. Ring-opening of Ts-protected 2-azabicyclo[4.1.0]heptanes.**



### 2.3. C4 Functionalization

N-Boc-1,4-dihydropyridine was chosen as substrate for the synthesis of 4-substituted piperidines. The double vinyl position and the +M effect of the nitrogen in addition should give this substrate an enormous reactivity and chemoselectivity towards C–H insertion making the possible cyclopropanation less favored.<sup>5</sup>

In the initial attempt for 4-substituted piperidine, a combination of methyl 2-diazo-2-phenylacetate and 0.5 mol% Rh<sub>2</sub>(DOSP)<sub>4</sub> was applied. However, decomposition of the starting-material to pyridine and the poisoning of the catalyst was thought to be the major problem, as pyridine was found in the crude NMR-analysis of the reaction. A higher catalyst loading should ensure the presence of active catalyst (2.5 mol%). In addition, the freshly made N-Boc-1,4-dihydropyridine was used for the dirhodium carbene reaction, followed by immediately hydrogenation of the C–H insertion product after isolation to prevent loss due to decomposition.

**Table S4. Catalyst and Condition Optimization for C–H Insertion at C4-position using 1,4-Dihydropyridine<sup>a</sup>**

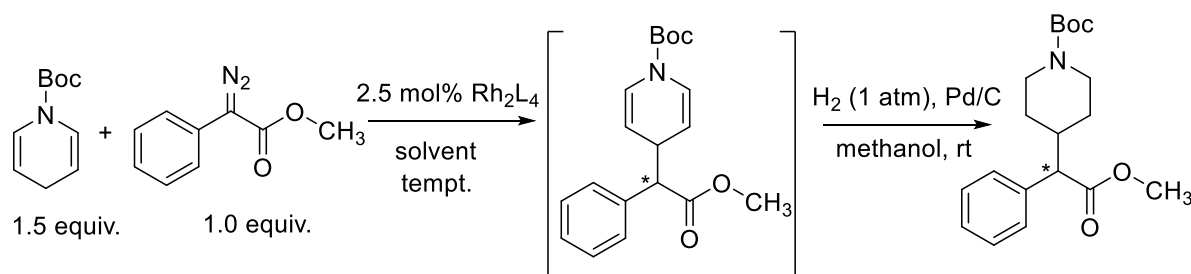

| entry | L                                                                                           | solvent          | tempt. (°C) | yield (%) <sup>b</sup> | ee (%) <sup>c</sup> |
|-------|---------------------------------------------------------------------------------------------|------------------|-------------|------------------------|---------------------|
| 1     | Rh <sub>2</sub> (S-DOSP) <sub>4</sub>                                                       | pentane          | 23          | no activity            |                     |
| 2     | Rh <sub>2</sub> (S-DOSP) <sub>4</sub>                                                       | dichloromethane  | 23          | no activity            |                     |
| 3     | Rh <sub>2</sub> (S-DOSP) <sub>4</sub>                                                       | trifluorotoluene | 23          | no activity            |                     |
| 4     | Rh <sub>2</sub> (S-DOSP) <sub>4</sub>                                                       | ethyl acetate    | 23          | no activity            |                     |
| 5     | Rh <sub>2</sub> (S-DOSP) <sub>4</sub>                                                       | -- (neat)        | 23          | 52                     | -55                 |
| 6     | Rh <sub>2</sub> (R-DOSP) <sub>4</sub>                                                       | -- (neat)        | 0           | 54                     | 61                  |
| 7     | Rh <sub>2</sub> (R-PTAD) <sub>4</sub>                                                       | -- (neat)        | 23          | 62                     | -37                 |
| 8     | Rh <sub>2</sub> (R-TCPTAD) <sub>4</sub>                                                     | -- (neat)        | 23          | 35                     | 6                   |
| 9     | Rh <sub>2</sub> (R-TPPTTL) <sub>4</sub>                                                     | -- (neat)        | 23          | 19                     | 32                  |
| 10    | Rh <sub>2</sub> (S-PTTL) <sub>4</sub>                                                       | -- (neat)        | 23          | 45                     | 30                  |
| 11    | Rh <sub>2</sub> (R- <i>p</i> -BrTPCP) <sub>4</sub>                                          | -- (neat)        | 23          | 58                     | -13                 |
| 12    | Rh <sub>2</sub> (R-3,5-di( <sup>t</sup> BuC <sub>6</sub> H <sub>4</sub> )TPCP) <sub>4</sub> | -- (neat)        | 23          | no activity            |                     |
| 13    | Rh <sub>2</sub> (S-2-Cl-5-Br-TPCP) <sub>4</sub>                                             | -- (neat)        | 23          | 68                     | 6                   |

<sup>a</sup>Reaction condition are using general procedures with variants as indicated in the table. <sup>b</sup>Isolated yield of the product after hydrogenation. <sup>c</sup>Determined by chiral HPLC analysis of isolated product.

No reaction activity was observed using various solvent. However, decomposition of diazoacetate (bubble formation and heat generated) was observed when solvent was removed under reduced pressure. The analysis of the crude <sup>1</sup>H-NMR clearly showed the formation of the desired product. Then, the reactions were carried out under neat conditions without any solvent. To obtain more reproduceable results, the setup of the reaction was changed. Instead of adding the diazo compound slowly to a solution of substrate and catalyst, the catalyst and the substrate were dissolved in small amounts of DCM (pentane for Rh<sub>2</sub>(DOSP)<sub>4</sub>). Stirring the mixture 1 min

before adding the diazo compound in one portion, makes sure that all catalyst is inactive. Afterwards, the solvent was removed under reduced pressure. Residues of solvent were removed under vacuum. The reaction started after a few minutes under HV conditions. In the course of the reaction, the viscosity of the mixture increased, inhibiting proper stirring. Therefore, the viscous mixture was dissolved again, stirred and then dried again twice. The catalysts were consecutively screened under the new conditions.

Screening the catalyst gave moderate yields of 50-60% in many cases. The highest yield of 68% was obtained using  $\text{Rh}_2(2\text{-Cl-5-Br-TPCP})_4$ . However, this catalyst gives almost no chirality induction and only an ee of 5%.  $\text{Rh}_2(\text{DOSP})_4$  gives reasonable yields of up to 52% with the best value in enantiomeric excess of 55%. A lower temperature of 0 °C while using  $\text{Rh}_2(\text{DOSP})_4$  gives a small rise in yield (54%) as well as in enantiomeric excess (61%).

As yields and enantioselectivity was not very good even after catalyst screening and experiments with lower temperatures, investigations using N-Boc-1,4-dihydropyridine were stopped. A more innovative approach was explored with direct C–H functionalization at C4 position on piperidines controlled by catalyst with appropriate combination of protection group.

**Table S5. Catalyst and Condition Optimization for C4 Functionalization<sup>a</sup>**
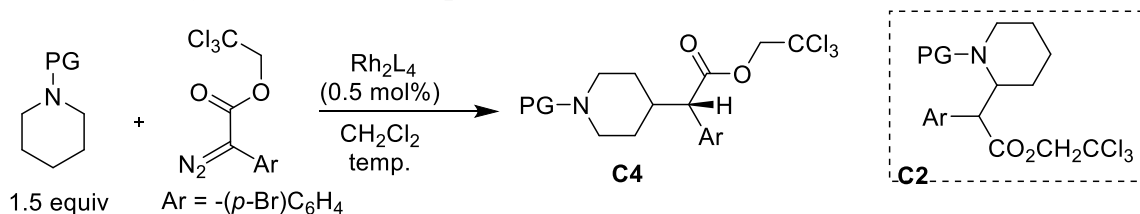

| entry           | PG        | L                       | temp.<br>(°C) | r.r.<br>( <b>C4</b> : <b>C2</b> ) <sup>b</sup>          | yield<br>(%) <sup>c</sup> | ee<br>(%) <sup>d</sup> |
|-----------------|-----------|-------------------------|---------------|---------------------------------------------------------|---------------------------|------------------------|
| 1               |           | <i>R</i> -DOSP          | 23            | <1:30                                                   | --                        | --                     |
| 2               |           | <i>R</i> -TCPTAD        | 23            | <1:30                                                   | --                        | --                     |
| 3               |           | <i>R</i> -TPPTTL        | 23            | <1:30                                                   | --                        | --                     |
| 4               |           | <i>R-p</i> -BrTPCP      | 23            | trace C-H insertion product in crude <sup>1</sup> H-NMR |                           |                        |
| 5               |           | <i>S</i> -2-Cl-5-BrTPCP | 23            | 4.2:1                                                   | 67                        | 90                     |
| -----           |           |                         |               |                                                         |                           |                        |
| 6               |           | <i>S</i> -2-Cl-5-BrTPCP | 23            | 4.0:1                                                   | 30                        | 96                     |
| 7               |           | <i>S</i> -2-Cl-5-BrTPCP | 23            | 3.9:1                                                   | --                        | --                     |
| 8               |           | <i>S</i> -2-Cl-5-BrTPCP | 23            | 4.7:1                                                   | 65                        | 96                     |
| 9               |           | <i>S</i> -2-Cl-5-BrTPCP | 23            | no C-H insertion product in crude <sup>1</sup> H-NMR    |                           |                        |
| -----           |           |                         |               |                                                         |                           |                        |
| 10              | <b>1e</b> | <i>S</i> -2-Cl-5-BrTPCP | 23            | 5.6:1                                                   | 78                        | 97                     |
| -----           |           |                         |               |                                                         |                           |                        |
| 11              | <b>1f</b> | <i>S</i> -2-Cl-5-BrTPCP | 23            | >30:1                                                   | 50                        | 97                     |
| 12              | <b>1f</b> | <i>S</i> -2-Cl-5-BrTPCP | 39            | >30:1                                                   | 57                        | 97                     |
| 13 <sup>e</sup> | <b>1f</b> | <i>S</i> -2-Cl-5-BrTPCP | 39            | >30:1                                                   | 61                        | 97                     |

<sup>a</sup>Reaction condition are using general procedures with variants as indicated in the table. <sup>b</sup>Determined from crude <sup>1</sup>H-NMR. <sup>c</sup>Isolated yield of the C4-H insertion product. <sup>d</sup>Determined by chiral HPLC analysis of isolated product. <sup>e</sup>Protected piperidine was used as limiting reagent, with 1.5 equivalent of diazoacetates.

Variation of catalysts and conditions were examined for C–H functionalization at C4 position of N-protected piperidines. The sterically demanding catalyst, Rh<sub>2</sub>(*S*-2-Cl-5-BrTPCP)<sub>4</sub>, was found to be the only catalyst gave C4-functionalization product (entry 5 vs entry 1-4). Variation of the substituent on the *para*-position of the benzenesulfonyl groups showed small change of the regioselectivity with electron-withdrawing CF<sub>3</sub> substituent giving highest selectivity for C4 product (4.7:1 r.r. in entry 8). When it was a simple methyl group next to the sulfonyl group (entry 10), which is expected to give lower selectivity due to diminished steric hindrance, the selectivity for C4 product is unexpectedly higher than arylsulfonyl-protected ones (5.6:1 r.r.). Significant improvement was achieved using strong electron-withdrawing oxalyl group, in which C4 product was observed as single regio-isomer with 97% ee.

### 3. Acquisition and Preparation of Compounds

The substrates and reagents were purchased from commercial sources (Sigma-Aldrich, Alfa-Aesar, Acros Organic, TCI America, Oakwood Chemical, Fisher Scientific and Strem Chemicals) and used directly without further purification. The chiral dirhodium catalysts are available in our lab and they were made according to literature procedures.

The following substrates were prepared by procedures adapted from literatures:

2,2,2-Trichloroethyl 2-(4-bromophenyl)-2-diazoacetate;<sup>1</sup> 2,2,2-trichloroethyl 2-diazo-2-phenylacetate;<sup>2</sup> 2,2,2-Trifluoroethyl 2-diazo-2-(4-(trifluoromethyl)phenyl)acetate;<sup>6</sup> 2,2,2-Trichloroethyl 2-(4-acetoxyphenyl)-2-diazoacetate;<sup>6</sup> 2,2,2-Trifluoroethyl 2-diazoacetate;<sup>6</sup> Methyl 2-(4-bromophenyl)-2-diazoacetate;<sup>6</sup> Methyl 2-diazo-2-phenylacetate;<sup>7</sup> Methyl 2-diazo-2-(4-(trifluoromethyl)phenyl)acetate;<sup>7</sup> Methyl 2-([1,1'-biphenyl]-4-yl)-2-diazoacetate;<sup>8</sup> *tert*-Butyl piperidine-1-carboxylate;<sup>9</sup> 1-Tosylpiperidine;<sup>9</sup> 1-(4-Bromophenyl)-2-(piperidin-1-yl)ethane-1,2-dione;<sup>10</sup> *o*-NBSA (*o*-nitrobenzenesulfonyl azide);<sup>11</sup> 2-(3,4-Dibromophenyl)acetic acid;<sup>12</sup> *tert*-Butyl pyridine-1(4H)-carboxylate.<sup>13</sup>

Other sulfonyl protected piperidines were prepared using adapted procedure similar to the one for 1-tosylpiperidine:<sup>9</sup>

To a solution of corresponding sulfonyl chloride (50 mmol, 1.0 equiv.) in 150 mL of CH<sub>2</sub>Cl<sub>2</sub>, piperidine (5.9 mL, 60 mmol, 1.2 equiv.) was added drop-wise with the generation of white fume, followed by the slow addition of triethylamine (10.5 mL, 75 mmol, 1.5 equiv.). The mixture was allowed to stir at room temperature (23 °C) for 15 hours. The consumption of piperidine was monitored by TLC (30% ethyl acetate in hexane). The solvent was removed under reduced pressure and the residue was purified by flash silica gel column chromatography using gradient as indicated.

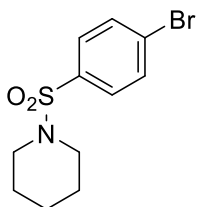

#### 1-((4-Bromophenyl)sulfonyl)piperidine (**1b**)

Purification was carried out with 8-12% ethyl acetate in hexane to give **1b** as white solid in 78% yield (39 mmol, 11.9 g). The NMR data are consistent with literature values.<sup>14</sup>

<sup>1</sup>H NMR (600 MHz, CDCl<sub>3</sub>) δ 7.67 (d, *J* = 8.6 Hz, 2H), 7.62 (d, *J* = 8.6 Hz, 2H), 2.99 (t, *J* = 5.5 Hz, 4H), 1.69 – 1.61 (m, 4H), 1.48 – 1.39 (m, 2H).

<sup>13</sup>C NMR (151 MHz, CDCl<sub>3</sub>) δ 135.5, 132.2, 129.1, 127.6, 46.9, 25.1, 23.5.

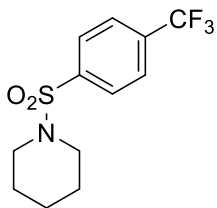

### 1-((4-(Trifluoromethyl)phenyl)sulfonyl)piperidine (**1d**)

It was done in 30 mmol scale of 4-(trifluoromethyl)benzenesulfonyl chloride. Purification was carried out with 8-15% ethyl acetate in hexane to give **1d** as white solid in 93% yield (28 mmol, 8.2 g). The NMR data are consistent with literature values.<sup>14</sup>

<sup>1</sup>H NMR (500 MHz, CDCl<sub>3</sub>) δ 7.90 (dt, *J* = 8.1, 0.7 Hz, 2H), 7.81 (dt, *J* = 8.3, 0.6 Hz, 2H), 3.03 (t, *J* = 5.5 Hz, 4H), 1.74 – 1.59 (m, 4H), 1.53 – 1.38 (m, 2H).

<sup>13</sup>C NMR (126 MHz, CDCl<sub>3</sub>) δ 140.2, 134.3 (q, *J* = 32.9 Hz), 128.2, 128.0, 126.2 (q, *J* = 3.6 Hz), 123.4 (d, *J* = 272.6 Hz), 47.0, 25.2, 23.5.

<sup>19</sup>F NMR (282 MHz, CDCl<sub>3</sub>) δ -63.12.

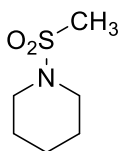

### 1-(Methylsulfonyl)piperidine (**1e**)

It was done in 30 mmol scale of methanesulfonyl chloride. Purification was carried out with 8-15% ethyl acetate in hexane to give **1e** as white solid in 82% yield (24.5 mmol, 4.0 g). The NMR data are consistent with literature values.<sup>15</sup>

<sup>1</sup>H NMR (500 MHz, CDCl<sub>3</sub>) δ 3.18 (t, *J* = 5.6 Hz, 4H), 2.77 (s, 3H), 1.72 – 1.64 (m, 4H), 1.61 – 1.53 (m, 2H).

<sup>13</sup>C NMR (126 MHz, CDCl<sub>3</sub>) δ 46.6, 34.1, 25.2, 23.5.

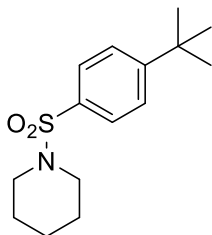

### 1-((4-(*tert*-Butyl)phenyl)sulfonyl)piperidine (**1g**)

Purification was carried out with 10-12% ethyl acetate in hexane to give **1g** as white solid in 98% yield (49 mmol, 13.8 g). The NMR data are consistent with literature values.<sup>14</sup>

<sup>1</sup>H NMR (600 MHz, CDCl<sub>3</sub>) δ 7.67 (d, *J* = 8.2 Hz, 2H), 7.52 (d, *J* = 8.5 Hz, 2H), 2.99 (t, *J* = 5.5 Hz, 4H), 1.68 – 1.61 (m, 4H), 1.47 – 1.39 (m, 2H), 1.35 (s, 9H).

$^{13}\text{C}$  NMR (151 MHz,  $\text{CDCl}_3$ )  $\delta$  156.2, 133.3, 127.6, 125.9, 46.9, 35.1, 31.1, 25.2, 23.5.

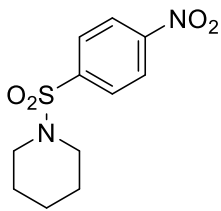

**1-((4-Nitrophenyl)sulfonyl)piperidine (1h)**

It was done in 30 mmol scale of 4-nitrobenzenesulfonyl chloride. Purification was carried out with 8-15% ethyl acetate in hexane to give **1h** as white solid in 83% yield (25 mmol, 6.7 g). The NMR data are consistent with literature values.<sup>16</sup>

$^1\text{H}$  NMR (500 MHz,  $\text{CDCl}_3$ )  $\delta$  8.39 (d,  $J = 8.9$  Hz, 2H), 7.96 (d,  $J = 8.9$  Hz, 2H), 3.06 (t,  $J = 5.5$  Hz, 4H), 1.67 (p,  $J = 5.9$  Hz, 4H), 1.47 (tt,  $J = 8.3, 4.6$  Hz, 2H).

$^{13}\text{C}$  NMR (126 MHz,  $\text{CDCl}_3$ )  $\delta$  150.1, 142.6, 128.8, 124.3, 47.0, 25.2, 23.4.

Other diazoacetate compounds were prepared using procedures in literatures from corresponding starting materials.<sup>1,6-7</sup>

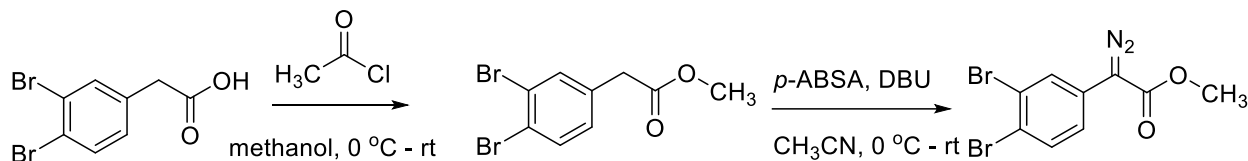

### Methyl 2-diazo-2-(3,4-dibromophenyl)acetate (2e)

The synthesis is adapted from literatures:<sup>3</sup> In a 250 mL round-bottom flask with argon atmosphere inside, 2-(3,4-dibromophenyl)acetic acid (4.6 g, 15.6 mmol, 1.0 equiv) was dissolved in 100 mL of methanol and cooled to 0 °C via ice bath. Acetyl chloride (2 mL, 18.8 mmol, 1.2 equiv) was added via a syringe. The reaction mixture was stirred for 15 hours, at which point it was warmed up to room temperature (23 °C). The reacted mixture was diluted with 100 mL of ethyl acetate and washed with NaHCO<sub>3</sub>. The organic layer was concentrated under reduced pressure and purified by flash column chromatography (10% ethyl acetate in hexane) to afford the orange solid in 93% yield (4.5 g). It was used immediately in the next step.

Methyl 2-(3,4-dibromophenyl)acetate (3.0 g, 9.7 mmol) was added in a flame-dried round-bottom flask, together with *p*-ABSA (*p*-acetamidobenzenesulfonyl azide) (3.03 g, 12.6 mmol, 1.3 equiv.). After the flask was flushed with argon gas (3 times), 50 mL of dry acetonitrile was added to the mixture for dissolving. Then, the reaction mixture was cooled to 0 °C via ice bath. DBU (1,8-diazabicyclo[5.4.0]undec-7-ene) (2.0 mL, 12.6 mmol, 1.3 equiv.) was added drop-wise at 0 °C. The mixture was allowed to stir at 0 °C for an additional 15 min, followed by 24 hours at room temperature (23 °C) after removing the ice bath. The resulting orange solution was quenched with 60 mL of saturated aqueous NH<sub>4</sub>Cl. The aqueous layer was extracted with diethyl ether (50 mL X 3) and the combined organic layer was washed with brine. Then, it was concentrated under reduced pressure and purified by flash column chromatography (5-8% diethyl ether in hexane) to provide orange solid in 95% yield (3.1 g).

**Rf** = 0.20 (5% diethyl ether in hexane);

**<sup>1</sup>H NMR** (500 MHz, CDCl<sub>3</sub>) δ 7.77 (d, *J* = 2.3 Hz, 1H), 7.57 (d, *J* = 8.5 Hz, 1H), 7.25 (dd, *J* = 8.6, 2.3 Hz, 1H), 3.87 (s, 3H);

**<sup>13</sup>C NMR** (126 MHz, CDCl<sub>3</sub>) δ 164.8, 133.9, 128.3, 126.9, 125.6, 123.5, 121.4, 52.4 (The resonance resulting from the diazo carbon was not observed);

**IR (neat)** 3091, 3005, 2952, 2092, 1702, 1470, 1358, 1238, 1196, 1160, 1049, 806, 737 cm<sup>-1</sup>;

**HRMS (+p ESI)** calcd for C<sub>9</sub>H<sub>7</sub>Br<sub>2</sub>N<sub>2</sub>O<sub>2</sub> (M+H)<sup>+</sup> 332.8869 found 332.88715.

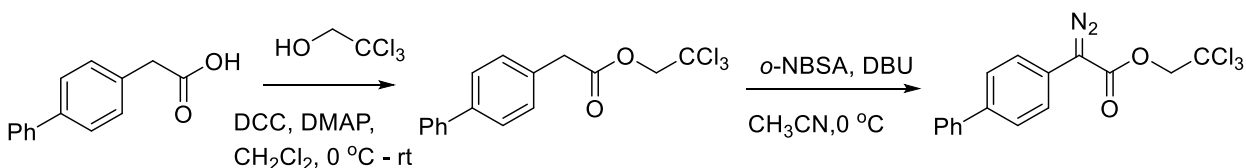

### 2,2,2-Trichloroethyl 2-([1,1'-biphenyl]-4-yl)-2-diazoacetate (3c)

The synthesis is adapted from literatures:<sup>1</sup> A dry 100 mL round-bottom flask was charged with 2-([1,1'-biphenyl]-4-yl)acetic acid (2.12g, 10 mmol, 1.0 equiv), DMAP (4-dimethylaminopyridine) (122.2 mg, 1 mmol, 0.1 equiv.) and 2,2,2-trichloroethanol (1.2 mL, 12 mmol, 1.2 equiv.). After the flask was flushed with argon gas (3 times), 20 mL of dry dichloromethane was added to the mixture. Then, the reaction mixture was cooled to 0 °C via ice bath. The solution of DCC (N,N'-dicyclohexylcarbodiimide) (2.27 g, 11 mmol, 1.1 equiv) in 20 mL of dry dichloromethane was then added slowly at 0 °C. The reaction mixture was stirred for 15 hours, at which point it was warmed up to room temperature (23 °C). The reacted mixture was filtered through Celite under reduced pressure and washed with dichloromethane. The filtrate was collected and concentrated under reduced pressure. The crude compound was purified by silica plug (3.8 cm diameter, 6 cm height, 5% ethyl acetate in hexane) to afford the white solid in 99% yield (9.9 mmol, 3.4 g). The product was used immediately in the next step.

The 2,2,2-trichloroethyl 2-([1,1'-biphenyl]-4-yl)acetate (3.4 g, 9.9 mmol, 1.0 equiv.) was added in a flame-dried round-bottom flask, together with *o*-NBSA (*o*-nitrobenzenesulfonyl azide) (3.39 g, 14.85 mmol, 1.5 equiv.). After the flask was flushed with argon gas (3 times), 30 mL of dry acetonitrile was added to the mixture for dissolving. Then, the reaction mixture was cooled to 0 °C via ice bath. DBU (1,8-diazabicyclo[5.4.0]undec-7-ene) (3.3 mL, 21.78 mmol, 2.2 equiv.) was added drop-wise at 0 °C. The mixture was allowed to stir for 1 hour at 0 °C, followed by pouring into a separation funnel with 40 mL of saturated aqueous NH<sub>4</sub>Cl for quenching. The aqueous layer was extracted with diethyl ether (30 mL X 2) and the combined organic layer was washed with brine. Then, it was concentrated under reduced pressure and purified by flash column chromatography (5-8% dichloromethane in hexane) to provide orange solid in 82% yield.

**Rf** = 0.50 (20% dichloromethane in hexane);

**<sup>1</sup>H NMR** (500 MHz, CDCl<sub>3</sub>) δ 7.62 (d, *J* = 8.5 Hz, 2H), 7.57 (d, *J* = 7.9 Hz, 2H), 7.54 (d, *J* = 8.5 Hz, 2H), 7.42 (t, *J* = 7.7 Hz, 2H), 7.33 (t, *J* = 7.4 Hz, 1H), 4.90 (s, 2H);

**<sup>13</sup>C NMR** (126 MHz, CDCl<sub>3</sub>) δ 163.4, 140.2, 139.1, 129.0, 127.8, 127.6, 127.0, 124.4, 123.5, 95.1, 73.9 (The resonance resulting from the diazo carbon was not observed);

**IR (neat)** 3054, 3037, 2954, 2086, 1699, 1489, 1376, 1342, 1230, 1151, 1054, 760, 718, 582 cm<sup>-1</sup>;

**HRMS (+p APCI)** calcd for C<sub>16</sub>H<sub>12</sub>Cl<sub>3</sub>O<sub>2</sub> (M+H-N<sub>2</sub>)<sup>+</sup> 340.9897 found 340.99004.



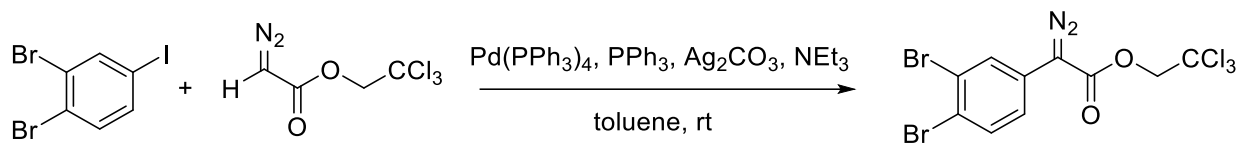

### 2,2,2-Trichloroethyl 2-diazo-2-(3,4-dibromophenyl)acetate (3e)

The synthesis is adapted from literatures:<sup>2</sup> A 100-mL round-bottom flask was charged with 1,2-dibromo-4-iodobenzene (3.62 g, 10 mmol, 1.0 equiv.), Pd(PPh<sub>3</sub>)<sub>4</sub> (577.8 mg, 0.5 mmol, 5 mol%), PPh<sub>3</sub> (262.3 mg, 1 mmol, 10 mol%) and Ag<sub>2</sub>CO<sub>3</sub> (1.38 g, 5 mmol, 0.5 equiv.). After the flask was flushed with argon, 40 mL of dry toluene was added, followed by the addition of NEt<sub>3</sub> (1.8 mL, 13 mmol, 1.3 equiv.) and 2,2,2-trifluoroethyl 2-diazoacetate (2.18 g, 13 mmol, 1.3 equiv.). The resulted mixture was stirred at room temperature for 4 h and then, filtered through a short silica plug (3.5 cm *diameter*, 5 cm *height*), eluting with ethyl acetate (20 mL). The crude product was concentrated and purified by column chromatography (6% diethyl ether in pentane) to afford 2,2,2-trichloroethyl 2-diazo-2-(3,4-dibromophenyl)acetate as yellow solid in % yield (or 2,2,2-trifluoroethyl 2-diazo-2-(4-nitrophenyl)acetate as yellow solid in 66% yield (6.6 mmol, 3.0 g).

**Rf** = 0.69 (10% diethyl ether in pentane);

**<sup>1</sup>H NMR** (500 MHz, CDCl<sub>3</sub>) δ 7.80 (d, *J* = 2.3 Hz, 1H), 7.60 (d, *J* = 8.5 Hz, 1H), 7.29 – 7.21 (m, 1H), 4.91 (s, 2H);

**<sup>13</sup>C NMR** (126 MHz, CDCl<sub>3</sub>) δ 162.6, 134.1, 128.5, 126.0, 125.8, 123.6, 122.1, 94.9, 74.1 (The resonance resulting from the diazo carbon was not observed);

**IR (neat)** 3098, 2954, 2094, 1711, 1469, 1372, 1340, 1273, 1234, 1139, 1046, 790, 712, 579 cm<sup>-1</sup>;

**HRMS (+p ESI)** calcd for C<sub>10</sub>H<sub>6</sub>Br<sub>2</sub>Cl<sub>3</sub>N<sub>2</sub>O<sub>2</sub> (M+H)<sup>+</sup> 448.7856 found 448.78616.

## 4. C–H Insertion Reactions

### 4.1 General Procedures

*GP-I:* A 16-mL reaction vial (21x70mm) with screw cap (open top with PTFE faced silicone septum) was charged with Rh<sub>2</sub>L<sub>4</sub> (0.0025 mmol, 0.5 mol%) and corresponding substrate (0.75 mmol, 1.5 equiv.). The reaction vessel was then evacuated and back filled with argon (3 times), followed by the addition of dry degassed CH<sub>2</sub>Cl<sub>2</sub> (2 mL). Corresponding donor/acceptor diazo compounds (0.5 mmol, 1.0 equiv.) was weighed in a 20-mL scintillation vial and dissolved in 4 mL of dry degassed CH<sub>2</sub>Cl<sub>2</sub> under argon atmosphere. Then, under room temperature (23 °C) and argon atmosphere, the diazo solution was added to the reaction vessel dropwise via syringe pump over 2 h. The reaction mixture was stirred at room temperature (23 °C) for another 4 h, and crude <sup>1</sup>H NMR was obtained after the resulted mixture was concentrated under vacuum. Finally, the desired product was obtained after purification using flash column chromatography with indicated eluting gradient.

*GP-II:* Similar to GP-I, but an additional step was added after the completion of the reaction, before the concentration for crude <sup>1</sup>H NMR: After the reaction mixture was stirred at room temperature (23 °C) for another 4 h, 1 mL of TFA (trichloroacetic acid) was added to the reaction mixture slowly and stirred at room temperature (23 °C) for 15 h. The resulted mixture was concentrated under reduce pressure and dissolved in 4 mL of dichloromethane, followed by addition of aqueous saturated NaHCO<sub>3</sub> drop-wise until no more bubble generated (~4 mL). The aqueous layer was extracted by 10 mL dichloromethane (3 times). The combined organic layer was concentrated for crude <sup>1</sup>H NMR and purified using flash column chromatography with indicated eluting gradient.

*GP-III:* In a round bottom flask, *tert*-butyl pyridine-1(4H)-carboxylate (91 mg, 0.5 mmol, 1.5 equiv.) and 2.5 mol% rhodium catalyst were dissolved in 5 mL dry solvent. Methyl 2-diazo-2-phenylacetate (59 mg, 0.333 mmol, 1 equiv.) was dissolved in 4 mL of the corresponding dry solvent and added within 2 h using a syringe pump. After addition, the reaction mixture was stirred for 30 min and the solvent was evaporated under reduced pressure.

*GP-IV:* In a round bottom flask, *tert*-butyl pyridine-1(4H)-carboxylate (91 mg, 0.5 mmol, 1.5 equiv.) and 2.5 mol% rhodium catalyst were dissolved in 5 mL dry pentane and stirred for 1 min. Methyl 2-diazo-2-phenylacetate (59 mg, 0.333 mmol, 1 equiv.) dissolved in 5 mL dry pentane was added to the mixture. The solvent was removed under reduced pressure and high vacuum was applied under stirring. After complete removal of the solvent the reaction starts under high vacuum conditions. With progressive conversion, the viscosity of the mixture increased. For better homogeneity solvent was added, the mixture was stirred for 1 min and the solvent was removed again before applying high vacuum. This was repeated for 2 times. The reaction is completed when gas formation stops. The crude product was purified by FC (EA/HEX: 2-10% EA gradient). As the product is decomposing under normal conditions complete analysis of the compound was not carried out. Enantiomeric excess was measured after hydrogenation of the 1,4-dihydropyridine.

### 4.2. Regioisomer and Diastereomer Ratios Determination

The crude <sup>1</sup>H NMR spectra in general procedures were utilized for regioisomer and diastereomer ratios determination, and it was obtained using Bruker-600 MHz spectrometer with a Prodigy probe, and the acquisition was done with 16 times of scans and 1 seconds of relaxation time.

### 4.3. Characterization Data of C–H Functionalization Products

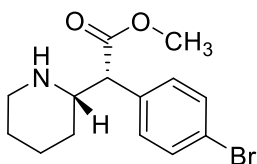

#### Methyl (*R*)-2-(4-bromophenyl)-2-((*S*)-piperidin-2-yl)acetate (*4a-erythro*)

Following *GP-II* (*tert*-butyl piperidine-1-carboxylate as substrate, reacting with methyl 2-(4-bromophenyl)-2-diazoacetate), the desired C2-product (mixture of both diastereomers) was obtained using 0-4% methanol in dichloromethane as eluting gradient in flash column chromatography.

Characterization data for the *erythro*-diastereomer was conducted on sample obtained in  $\text{Rh}_2(\text{S-2-Cl-5-BrTPCP})_4$ -catalyzed reaction (83% ee).

Yellow oil

**Rf** = 0.36 (5% methanol in dichloromethane);

**[ $\alpha$ ] $^{20}_{\text{D}}$** : +22.2° (*c* = 0.45,  $\text{CHCl}_3$ , 83% ee);

**$^1\text{H NMR}$**  (500 MHz,  $\text{CDCl}_3$ )  $\delta$  7.47 (d, *J* = 8.4 Hz, 2H), 7.29 (d, *J* = 8.4 Hz, 2H), 3.66 (s, 3H), 3.43 (d, *J* = 10.0 Hz, 1H), 3.06 (td, *J* = 10.2, 2.3 Hz, 1H), 2.93 (d, *J* = 11.7 Hz, 1H), 2.50 (td, *J* = 11.5, 2.9 Hz, 1H), 1.88 – 1.70 (m, 2H), 1.61 – 1.54 (m, 1H), 1.46 – 1.33 (m, 2H), 1.30 – 1.17 (m, 1H);

**$^{13}\text{C NMR}$**  (126 MHz,  $\text{CDCl}_3$ )  $\delta$  172.8, 135.2, 132.1, 130.5, 122.1, 59.1, 57.9, 52.2, 47.2, 31.2, 25.9, 24.6;

**IR** (*neat*) 2934, 2854, 1734, 1488, 1435, 1331, 1161, 1119, 1011, 763  $\text{cm}^{-1}$ ;

**HRMS** (+p APCI) calcd for  $\text{C}_{14}\text{H}_{19}\text{BrNO}_2$  (*M*+*H*)<sup>+</sup> 312.0594 found 312.05941;

**HPLC** (ODH column, 1% *i*-propanol in hexane, 0.5 mL  $\text{min}^{-1}$ , 1 mg  $\text{mL}^{-1}$ , 30 min, UV 230 nm) retention times of 11.17 min (major) and 12.59 min (minor) 83% ee with  $\text{Rh}_2(\text{S-2-Cl-5-BrTPCP})_4$ .

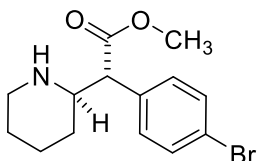

#### Methyl 2-(4-bromophenyl)-2-(piperidin-2-yl)acetate (*4a-threo*)

Characterization data for the *threo*-diastereomer was conducted on sample obtained in  $\text{Rh}_2(\text{R-DOSP})_4$ -catalyzed reaction (ee not determined).

Yellow oil

**Rf** = 0.32 (5% methanol in dichloromethane);

**$^1\text{H NMR}$**  (500 MHz,  $\text{CDCl}_3$ )  $\delta$  7.44 (d, *J* = 8.4 Hz, 2H), 7.17 (d, *J* = 8.4 Hz, 2H), 3.65 (s, 3H), 3.41 (d, *J* = 10.0 Hz, 1H), 3.08 (td, *J* = 10.4, 2.6 Hz, 2H), 2.68 (td, *J* = 11.9, 2.7 Hz, 1H), 2.01 (s, broad, 1H), 1.75 – 1.65 (m, 1H), 1.64 – 1.52 (m, 1H), 1.37 (qt, *J* = 12.4, 3.9 Hz, 1H), 1.29 – 1.19 (m, 2H), 1.01 – 1.87 (m, 1H);

**$^{13}\text{C NMR}$**  (126 MHz,  $\text{CDCl}_3$ )  $\delta$  173.4, 135.4, 131.8, 130.2, 121.6, 58.8, 58.1, 52.1, 46.9, 30.0, 26.1, 24.3;

**IR** (*neat*) 2931, 2853, 1731, 1489, 1434, 1196, 1163, 1012, 824, 765  $\text{cm}^{-1}$ ;

**HRMS** (+p APCI) calcd for  $\text{C}_{14}\text{H}_{19}\text{BrNO}_2$  (*M*+*H*)<sup>+</sup> 312.0594 found 312.05945;

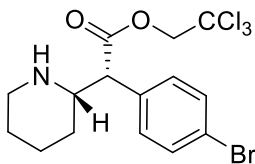

**2,2,2-Trichloroethyl (*R*)-2-(4-bromophenyl)-2-((*S*)-piperidin-2-yl)acetate (**5a-erythro**)**

Following *GP-II* (*tert*-butyl piperidine-1-carboxylate as substrate, reacting 2,2,2-trichloroethyl 2-(4-bromophenyl)-2-diazoacetate), the desired C2-product (mixture of both diastereomers) was obtained using 0-4% methanol in dichloromethane as eluting gradient in flash column chromatography.

Characterization data for the *erythro*-diastereomer was conducted on sample obtained in Rh<sub>2</sub>(*R*-TCPTAD)<sub>4</sub>-catalyzed reaction (93% ee).

Yellow oil

**Rf** = 0.36 (5% methanol in dichloromethane);

**[α]<sup>20</sup><sub>D</sub>**: -2.8° (c = 1.00, CHCl<sub>3</sub>, 93% ee);

**<sup>1</sup>H NMR** (500 MHz, CDCl<sub>3</sub>) δ 7.49 (d, *J* = 8.4 Hz, 2H), 7.32 (d, *J* = 8.4 Hz, 2H), 4.76 (d, *J* = 12.0 Hz, 1H), 4.66 (d, *J* = 12.0 Hz, 1H), 3.58 (d, *J* = 10.0 Hz, 1H), 3.15 (td, *J* = 10.1, 2.2 Hz, 1H), 2.96 (d, *J* = 11.5 Hz, 1H), 2.53 (td, *J* = 11.4, 2.7 Hz, 1H), 1.90 – 1.74 (m, 2H), 1.63 – 1.54 (m, 1H), 1.47 – 1.34 (m, 2H), 1.33 – 1.25 (m, 1H);

**<sup>13</sup>C NMR** (126 MHz, CDCl<sub>3</sub>) δ 170.5, 134.3, 132.2, 130.7, 122.5, 94.8, 74.2, 58.7, 57.9, 47.1, 31.1, 25.9, 24.5;

**IR (neat)** 2935, 2855, 1749, 1488, 1452, 1139, 1116, 1073, 1012, 761, 722 cm<sup>-1</sup>;

**HRMS (+p APCI)** calcd for C<sub>15</sub>H<sub>18</sub>BrCl<sub>3</sub>NO<sub>2</sub> (M+H)<sup>+</sup> 427.9581 found 427.95886;

**HPLC** (ODH column, 0.5% *i*-propanol in hexane, 0.35 mL min<sup>-1</sup>, 1 mg mL<sup>-1</sup>, 60 min, UV 230 nm) retention times of 26.84 min (major) and 28.93 min (minor) 93% ee with Rh<sub>2</sub>(*R*-TCPTAD)<sub>4</sub>.

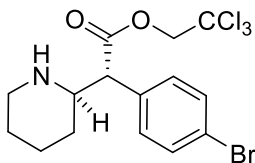

**2,2,2-Trichloroethyl 2-(4-bromophenyl)-2-(piperidin-2-yl)acetate (**5a-threo**)**

Characterization data for the *threo*-diastereomer was conducted on sample obtained in Rh<sub>2</sub>(*R*-DOSP)<sub>4</sub>-catalyzed reaction (ee not determined).

Yellow oil

**Rf** = 0.29 (5% methanol in dichloromethane);

**<sup>1</sup>H NMR** (500 MHz, CDCl<sub>3</sub>) δ 7.46 (d, *J* = 8.6 Hz, 2H), 7.22 (d, *J* = 8.1 Hz, 2H), 4.72 (s, 2H), 3.56 (d, *J* = 10.1 Hz, 1H), 3.18 (td, *J* = 10.5, 2.6 Hz, 1H), 3.08 (d, *J* = 12.3 Hz, 1H), 2.69 (td, *J* = 11.9, 2.8 Hz, 1H), 1.80 – 1.66 (m, 1H), 1.59 (d, *J* = 12.9 Hz, 1H), 1.44 – 1.18 (m, 3H), 0.96 (qd, *J* = 12.2, 3.6 Hz, 1H);

**<sup>13</sup>C NMR** (126 MHz, CDCl<sub>3</sub>) δ 171.4, 134.7, 132.0, 130.6, 122.0, 94.8, 74.3, 58.9, 58.2, 46.9, 30.2, 26.4, 24.4;

**IR (neat)** 2936, 2922, 2857, 1652, 1568, 1380, 1013, 763, 724, 529 cm<sup>-1</sup>;

**HRMS (+p APCI)** calcd for C<sub>15</sub>H<sub>18</sub>BrCl<sub>3</sub>NO<sub>2</sub> (M+H)<sup>+</sup> 427.9581 found 427.95871;

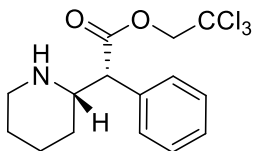

**2,2,2-Trichloroethyl (*R*)-2-phenyl-2-((*S*)-piperidin-2-yl)acetate (**5b-erythro**)**

Following *GP-II* (*tert*-butyl piperidine-1-carboxylate as substrate, reacting 2,2,2-trichloroethyl 2-diazo-2-phenylacetate), the desired C2-product (mixture of both diastereomers) was obtained using 0-4% methanol in dichloromethane as eluting gradient in flash column chromatography.

Characterization data for the *erythro*-diastereomer was conducted on sample obtained in  $\text{Rh}_2(\text{R-TCPTAD})_4$ -catalyzed reaction (73% ee).

Yellow oil

**Rf** = 0.30 (5% methanol in dichloromethane);

**$[\alpha]^{20}_{\text{D}}$** : +6.4° (*c* = 1.00,  $\text{CHCl}_3$ , 73% ee);

**$^1\text{H NMR}$**  (500 MHz,  $\text{CDCl}_3$ )  $\delta$  7.49 – 7.41 (m, 2H), 7.39 – 7.28 (m, 3H), 4.76 (d, *J* = 12.0 Hz, 1H), 4.65 (d, *J* = 12.0 Hz, 1H), 3.61 (d, *J* = 10.2 Hz, 1H), 3.19 (td, *J* = 10.2, 2.4 Hz, 1H), 2.94 (d, *J* = 11.5 Hz, 1H), 2.53 (td, *J* = 11.5, 2.8 Hz, 1H), 1.88 (d, *J* = 14.2 Hz, 1H), 1.82 (d, *J* = 13.7 Hz, 1H), 1.62 – 1.56 (m, 1H), 1.50 – 1.36 (m, 2H), 1.36 – 1.26 (m, 1H);

**$^{13}\text{C NMR}$**  (126 MHz,  $\text{CDCl}_3$ )  $\delta$  170.9, 135.3, 129.1, 129.0, 128.3, 94.9, 74.2, 58.7, 58.5, 47.1, 31.2, 25.9, 24.5;

**IR (neat)** 2934, 2854, 1748, 1454, 1332, 1289, 1138, 1115, 774, 718, 699  $\text{cm}^{-1}$ ;

**HRMS (+p APCI)** calcd for  $\text{C}_{15}\text{H}_{19}\text{Cl}_3\text{NO}_2$  ( $\text{M}+\text{H}$ )<sup>+</sup> 350.0476. found 350.04780;

**HPLC** (ODH column, 1% *i*-propanol in hexane, 1 mL  $\text{min}^{-1}$ , 1 mg  $\text{mL}^{-1}$ , 30 min, UV 230 nm) retention times of 5.41 min (minor) and 5.94 min (major) 73% ee with  $\text{Rh}_2(\text{R-TCPTAD})_4$ .

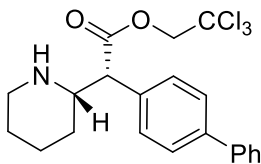

**2,2,2-Trichloroethyl (*R*)-2-([1,1'-biphenyl]-4-yl)-2-((*S*)-piperidin-2-yl)acetate (**5c-erythro**)**

Following *GP-II* (*tert*-butyl piperidine-1-carboxylate as substrate, reacting 2,2,2-trichloroethyl 2-([1,1'-biphenyl]-4-yl)-2-diazoacetate), the desired C2-product (mixture of both diastereomers) was obtained using 0-4% methanol in dichloromethane as eluting gradient in flash column chromatography.

Characterization data for the *erythro*-diastereomer was conducted on sample obtained in  $\text{Rh}_2(\text{R-TCPTAD})_4$ -catalyzed reaction (61% ee).

Yellow oil

**Rf** = 0.36 (5% methanol in dichloromethane);

**[ $\alpha$ ]<sup>20</sup><sub>D</sub>**: -4.3° (c = 0.91,  $\text{CHCl}_3$ , 61% ee);

**<sup>1</sup>H NMR** (500 MHz,  $\text{CDCl}_3$ )  $\delta$  7.62 – 7.56 (m, 4H), 7.51 (d, *J* = 8.3 Hz, 2H), 7.44 (t, *J* = 7.6 Hz, 2H), 7.39 – 7.32 (m, 1H), 4.80 (d, *J* = 12.0 Hz, 1H), 4.66 (d, *J* = 12.0 Hz, 1H), 3.65 (d, *J* = 10.1 Hz, 1H), 3.23 (td, *J* = 10.1, 2.4 Hz, 1H), 2.97 (d, *J* = 11.6 Hz, 1H), 2.56 (td, *J* = 11.5, 2.8 Hz, 1H), 1.97 – 1.86 (m, 1H), 1.86 – 1.81 (m, 1H), 1.65 – 1.56 (m, 1H), 1.53 – 1.39 (m, 2H), 1.39 – 1.28 (m, 1H);

**<sup>13</sup>C NMR** (126 MHz,  $\text{CDCl}_3$ )  $\delta$  170.9, 141.2, 140.6, 134.3, 129.4, 129.0, 127.8, 127.6, 127.2, 94.9, 74.3, 58.8, 58.2, 47.2, 31.3, 26.0, 24.6;

**IR (neat)** 3030, 2935, 2854, 1749, 1487, 1451, 1331, 1139, 1117, 776, 741, 725, 698  $\text{cm}^{-1}$ ;

**HRMS (+p APCI)** calcd for  $\text{C}_{21}\text{H}_{22}\text{Cl}_3\text{NO}_2$  ( $\text{M}+\text{H}$ )<sup>+</sup> 426.0789 found 426.07943;

**HPLC** (obtained on its 2,2,2-trifluoroacetamide derivative) (ADH column, 3% *i*-propanol in hexane, 1 mL  $\text{min}^{-1}$ , 1 mg  $\text{mL}^{-1}$ , 40 min, UV 230 nm) retention times of 23.99 min (major) and 27.95 min (minor) 61% ee with  $\text{Rh}_2(\text{R-TCPTAD})_4$ .

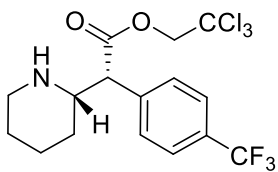

**2,2,2-Trichloroethyl (*R*)-2-((*S*)-piperidin-2-yl)-2-(4-(trifluoromethyl)phenyl)acetate (**5d-erythro**)**

Following *GP-II* (*tert*-butyl piperidine-1-carboxylate as substrate, reacting 2,2,2-trichloroethyl 2-diazo-2-(4-(trifluoromethyl)phenyl)acetate), the desired C2-product (mixture of both diastereomers) was obtained using 0-4% methanol in dichloromethane as eluting gradient in flash column chromatography.

Characterization data for the *erythro*-diastereomer was conducted on sample obtained in  $\text{Rh}_2(\text{R-TCPTAD})_4$ -catalyzed reaction (37% ee).

White solid:

**Rf** = 0.40 (5% methanol in dichloromethane);

**$[\alpha]_D^{20}$** : +1.7° (c = 0.91,  $\text{CHCl}_3$ , 37% ee);

**$^1\text{H NMR}$**  (500 MHz,  $\text{CDCl}_3$ )  $\delta$  7.63 (d,  $J$  = 8.7 Hz, 2H), 7.58 (d,  $J$  = 8.2 Hz, 2H), 4.77 (d,  $J$  = 12.0 Hz, 1H), 4.66 (d,  $J$  = 11.9 Hz, 1H), 3.69 (d,  $J$  = 9.9 Hz, 1H), 3.22 (td,  $J$  = 10.0, 2.4 Hz, 1H), 2.96 (d,  $J$  = 12.8 Hz, 1H), 2.54 (td,  $J$  = 11.5, 2.9 Hz, 1H), 1.92 – 1.77 (m, 2H), 1.65 – 1.54 (m, 1H), 1.48 – 1.36 (m, 2H), 1.35 – 1.26 (m, 1H);

**$^{13}\text{C NMR}$**  (126 MHz,  $\text{CDCl}_3$ )  $\delta$  170.3, 139.4, 130.6 (q,  $J$  = 32.6 Hz), 129.5, 126.0 (q,  $J$  = 3.8 Hz), 124.1 (q,  $J$  = 272.2 Hz), 94.7, 74.3, 58.8, 58.3, 47.1, 31.1, 25.9, 24.5;

**$^{19}\text{F NMR}$**  (282 MHz,  $\text{CDCl}_3$ )  $\delta$  -62.67;

**IR (neat)** 2938, 2957, 1750, 1324, 1164, 1117, 1068, 1019, 846, 758, 718, 601, 571  $\text{cm}^{-1}$ ;

**HRMS (+p APCI)** calcd for  $\text{C}_{16}\text{H}_{18}\text{Cl}_3\text{F}_3\text{NO}_2$  (M+H)<sup>+</sup> 418.0350 found 418.03508;

**HPLC** (ODH column, 0.5% *i*-propanol in hexane, 1.5 mL  $\text{min}^{-1}$ , 1 mg  $\text{mL}^{-1}$ , 30 min, UV 230 nm) retention times of 3.84 min (major) and 4.58 min (minor) 37% ee with  $\text{Rh}_2(\text{R-TCPTAD})_4$ .

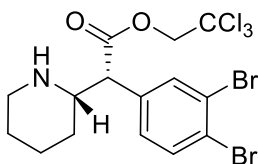

**2,2,2-Trichloroethyl (*R*)-2-(3,4-dibromophenyl)-2-((*S*)-piperidin-2-yl)acetate (*5e-erythro*)**

Following *GP-II* (*tert*-butyl piperidine-1-carboxylate as substrate, reacting 2,2,2-trichloroethyl 2-diazo-2-(3,4-dibromophenyl)acetate), the desired C2-product (mixture of both diastereomers) was obtained using 0-4% methanol in dichloromethane as eluting gradient in flash column chromatography.

Characterization data for the *erythro*-diastereomer was conducted on sample obtained in  $\text{Rh}_2(\text{R-TCPTAD})_4$ -catalyzed reaction (37% ee).

Yellow oil

**Rf** = 0.43 (5% methanol in dichloromethane);

**$[\alpha]_D^{20}$** : -4.3° (c = 1.00,  $\text{CHCl}_3$ , 29% ee);

**$^1\text{H NMR}$**  (500 MHz,  $\text{CDCl}_3$ )  $\delta$  7.73 (d,  $J$  = 2.1 Hz, 1H), 7.60 (d,  $J$  = 8.2 Hz, 1H), 7.26 (dd,  $J$  = 8.4, 2.3 Hz, 1H), 4.79 (d,  $J$  = 12.0 Hz, 1H), 4.65 (d,  $J$  = 11.9 Hz, 1H), 3.55 (d,  $J$  = 9.8 Hz, 1H), 3.13 (td,  $J$  = 10.1, 2.3 Hz, 1H), 2.97 (d,  $J$  = 11.8 Hz, 1H), 2.55 (td,  $J$  = 11.6, 2.9 Hz, 1H), 1.87 – 1.78 (m, 2H), 1.65 – 1.58 (m, 1H), 1.46 – 1.32 (m, 2H), 1.32 – 1.23 (m, 1H);

**$^{13}\text{C NMR}$**  (126 MHz,  $\text{CDCl}_3$ )  $\delta$  170.0, 136.3, 134.1, 134.1, 129.2, 125.5, 124.8, 94.7, 74.3, 58.7, 57.6, 47.0, 31.1, 25.8, 24.4;

**IR (neat)** 2936, 2855, 1747, 1461, 1139, 1113, 1014, 907, 727, 571  $\text{cm}^{-1}$ ;

**HRMS (+p APCI)** calcd for  $\text{C}_{15}\text{H}_{17}\text{Br}_2\text{Cl}_3\text{NO}_2$  ( $\text{M}+\text{H}$ )<sup>+</sup> 505.8686 found 505.86927;

**HPLC** (ODH column, 0.5% *i*-propanol in hexane, 1  $\text{mL min}^{-1}$ , 1  $\text{mg mL}^{-1}$ , 30 min, UV 230 nm) retention times of 7.69 min (major) and 8.32 min (minor) 29% ee with  $\text{Rh}_2(\text{R-TCPTAD})_4$ .



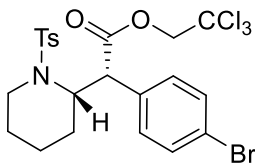

**2,2,2-Trichloroethyl (R)-2-(4-bromophenyl)-2-((S)-1-tosylpiperidin-2-yl)acetate**

Following *GP-I* (1-tosylpiperidine as substrate, reacting 2,2,2-trichloroethyl 2-(4-bromophenyl)-2-diazoacetate), the desired C2-product was obtained using 0-12% ethyl acetate in hexane as eluting gradient in flash column chromatography (a 2<sup>nd</sup> column with 35-100% dichloromethane in hexane was conducted if the product is not pure enough).

Characterization data for the *erythro*-diastereomer was conducted on sample obtained in Rh<sub>2</sub>(*R*-TPPTTL)<sub>4</sub>-catalyzed reaction (76% ee).

White solid: **m.p.** 131-133 °C

**Rf** = 0.45 (20% ethyl acetate in hexane);

**[α]<sub>D</sub><sup>20</sup>**: +24.9° (c = 1.00, CHCl<sub>3</sub>, 76% ee);

**<sup>1</sup>H NMR** (600 MHz, CDCl<sub>3</sub>) δ 7.35 (d, *J* = 8.5 Hz, 2H), 7.23 (d, *J* = 8.5 Hz, 2H), 7.17 (d, *J* = 8.3 Hz, 2H), 7.11 (d, *J* = 8.0 Hz, 2H), 4.88 (dd, *J* = 11.6, 4.5 Hz, 1H), 4.84 (d, *J* = 12.0 Hz, 1H), 4.58 (d, *J* = 12.0 Hz, 1H), 4.22 (d, *J* = 11.7 Hz, 1H), 3.55 (d, *J* = 15.1 Hz, 1H), 2.92 – 2.82 (m, 1H), 2.40 (s, 3H), 1.88 – 1.80 (m, 1H), 1.80 – 1.66 (m, 3H), 1.54 – 1.46 (m, 2H).;

**<sup>13</sup>C NMR** (151 MHz, CDCl<sub>3</sub>) δ 170.2, 143.2, 137.6, 134.0, 131.9, 130.5, 129.5, 127.2, 122.5, 94.6, 74.4, 54.5, 50.8, 41.3, 27.3, 24.2, 21.7, 18.9;

**IR** (*neat*) 2945, 2869, 1750, 1489, 1338, 1325, 1294, 1155, 1092, 932, 908, 816, 767, 718, 657, 552 cm<sup>-1</sup>;

**HRMS** (+p APCI) calcd for C<sub>22</sub>H<sub>24</sub>BrCl<sub>3</sub>NO<sub>4</sub> (M+H)<sup>+</sup> 581.9670 found 581.96713;

**HPLC** (ADH column, 5% *i*-propanol in hexane, 0.5 mL min<sup>-1</sup>, 1 mg mL<sup>-1</sup>, 80 min, UV 230 nm) retention times of 40.94 min (major) and 55.33 min (minor) 76% ee with Rh<sub>2</sub>(*R*-TPPTTL)<sub>4</sub>.

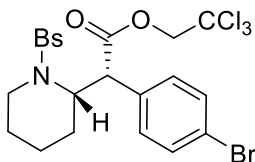

**2,2,2-Trichloroethyl (R)-2-(4-bromophenyl)-2-((S)-1-((4-bromophenyl)sulfonyl)piperidin-2-yl)acetate (6a)**

Following *GP-I* (1-((4-bromophenyl)sulfonyl)piperidine) as substrate, reacting 2,2,2-trichloroethyl 2-(4-bromophenyl)-2-diazoacetate, the desired C2-product was obtained using 0-12% ethyl acetate in hexane as eluting gradient in flash column chromatography (a 2<sup>nd</sup> column with 35-100% dichloromethane in hexane was conducted if the product is not pure enough).

Characterization data for the *erythro*-diastereomer was conducted on sample obtained in Rh<sub>2</sub>(*R*-TCPTAD)<sub>4</sub>-catalyzed reaction (97% ee).

White solid: **m.p.** 159-161 °C

**Rf** = 0.44 (20% ethyl acetate in hexane);

[ $\alpha$ ]<sub>D</sub><sup>20</sup>: +29.4° (c = 1.00, CHCl<sub>3</sub>, 97% ee);

**<sup>1</sup>H NMR** (600 MHz, CDCl<sub>3</sub>)  $\delta$  7.45 (d, *J* = 8.6 Hz, 2H), 7.38 (d, *J* = 8.5 Hz, 2H), 7.23 (d, *J* = 8.5 Hz, 2H), 7.11 (d, *J* = 8.6 Hz, 2H), 4.90 – 4.80 (m, 2H), 4.59 (d, *J* = 12.0 Hz, 1H), 4.21 (d, *J* = 11.8 Hz, 1H), 3.58 – 3.47 (m, 1H), 2.90 (ddd, *J* = 14.8, 12.5, 3.6 Hz, 1H), 1.89 – 1.80 (m, 1H), 1.81 – 1.67 (m, 3H), 1.60 – 1.50 (m, 2H);

**<sup>13</sup>C NMR** (151 MHz, CDCl<sub>3</sub>)  $\delta$  169.9, 139.3, 133.8, 132.1, 131.9, 130.3, 128.6, 127.3, 122.5, 94.4, 74.3, 54.7, 50.5, 41.3, 27.3, 24.1, 18.7;

**IR (neat)** 2946, 2869, 1751, 1489, 1327, 1158, 1011, 933, 822, 768, 755, 609 cm<sup>-1</sup>;

**HRMS (+p APCI)** calcd for C<sub>21</sub>H<sub>21</sub>Br<sub>2</sub>Cl<sub>3</sub>SNO<sub>4</sub> (M+H)<sup>+</sup> 645.8618 found 645.86216;

**HPLC** (ADH column, 5% *i*-propanol in hexane, 0.5 mL min<sup>-1</sup>, 1 mg mL<sup>-1</sup>, 80 min, UV 230 nm) retention times of 44.54 min (major) and 66.29 min (minor) 97% ee with Rh<sub>2</sub>(*R*-TCPTAD)<sub>4</sub>.

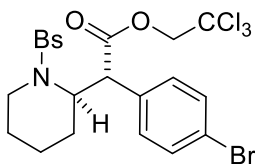

**2,2,2-Trichloroethyl 2-(4-bromophenyl)-2-(1-((4-bromophenyl)sulfonyl)piperidin-2-yl)acetate**

Characterization data for the *threo*-diastereomer was conducted on sample obtained in Rh<sub>2</sub>(*R*-TCPTAD)<sub>4</sub>-catalyzed reaction (ee not determined).

White solid, **Rf** = 0.45 (20% ethyl acetate in hexane);

**<sup>1</sup>H NMR** (600 MHz, CDCl<sub>3</sub>)  $\delta$  7.73 (d, *J* = 8.8 Hz, 2H), 7.65 (d, *J* = 8.6 Hz, 2H), 7.50 (d, *J* = 8.6 Hz, 2H), 7.37 (d, *J* = 8.5 Hz, 2H), 4.79 (dd, *J* = 11.6, 4.7 Hz, 1H), 4.58 (d, *J* = 11.9 Hz, 1H), 4.45 (d, *J* = 11.9 Hz, 1H), 4.25 (d, *J* = 11.7 Hz, 1H), 3.80 (dd, *J* = 15.0, 4.7 Hz, 1H), 3.36 – 3.23 (m, 1H), 1.60 – 1.41 (m, 3H), 1.38 – 1.27 (m, 2H), 1.24 – 1.18 (m, 1H);

**<sup>13</sup>C NMR** (151 MHz, CDCl<sub>3</sub>)  $\delta$  169.7, 140.4, 133.4, 132.3, 132.2, 130.5, 128.8, 127.5, 122.6, 94.4, 74.5, 56.0, 50.8, 41.4, 24.5, 23.7, 18.0.

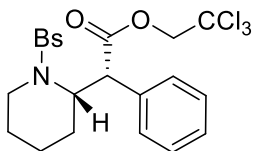

**2,2,2-Trichloroethyl (R)-2-((S)-1-((4-bromophenyl)sulfonyl)piperidin-2-yl)-2-phenylacetate (6b)**

Following *GP-I* (1-((4-bromophenyl)sulfonyl)piperidine as substrate, reacting 2,2,2-trichloroethyl 2-diazo-2-phenylacetate) with reaction under reflux dichloromethane (39 °C), the desired C2-product was obtained using 0-12% ethyl acetate in hexane as eluting gradient in flash column chromatography (a 2<sup>nd</sup> column with 35-100% dichloromethane in hexane was conducted if the product is not pure enough).

Characterization data for the *erythro*-diastereomer was conducted on sample obtained in Rh<sub>2</sub>(*R*-TPPTTL)<sub>4</sub>-catalyzed reaction (52% ee).

White solid: **m.p.** 146-148 °C

**R<sub>f</sub>** = 0.48 (20% ethyl acetate in hexane);

**[α]<sub>D</sub><sup>20</sup>**: +9.9° (c = 1.00, CHCl<sub>3</sub>, 52% ee);

**<sup>1</sup>H NMR** (600 MHz, CDCl<sub>3</sub>) δ 7.38 (d, *J* = 7.4 Hz, 2H), 7.33 (dd, *J* = 11.9, 7.8 Hz, 3H), 7.29 (d, *J* = 7.7 Hz, 2H), 7.00 (d, *J* = 8.4 Hz, 2H), 4.97 (dd, *J* = 11.9, 4.7 Hz, 1H), 4.86 (d, *J* = 11.9 Hz, 1H), 4.58 (d, *J* = 12.0 Hz, 1H), 4.26 (d, *J* = 11.7 Hz, 1H), 3.40 (d, *J* = 14.5, 1H), 2.96 – 2.87 (m, 1H), 1.92 – 1.70 (m, 4H), 1.61 – 1.53 (m, 2H);

**<sup>13</sup>C NMR** (151 MHz, CDCl<sub>3</sub>) δ 170.4, 139.4, 135.0, 132.1, 129.0, 128.9, 128.3, 127.1, 94.7, 74.3, 54.6, 51.2, 41.3, 27.6, 24.2, 18.8;

**IR (neat)** 2947, 2868, 1749, 1575, 1470, 1455, 1319, 1287, 1156, 1089, 1067, 1010, 934, 907, 761 cm<sup>-1</sup>;

**HRMS (+p APCI)** calcd for C<sub>21</sub>H<sub>22</sub>BrCl<sub>3</sub>SNO<sub>4</sub> (M+H)<sup>+</sup> 567.9513 found 567.95184;

**HPLC** (ODH column, 2% *i*-propanol in hexane, 0.6 mL min<sup>-1</sup>, 1 mg mL<sup>-1</sup>, 60 min, UV 230 nm) retention times of 39.84 min (minor) and 44.79 min (major) 52% ee with Rh<sub>2</sub>(*R*-TPPTTL)<sub>4</sub>.

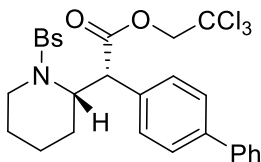

**2,2,2-Trichloroethyl (R)-2-((1,1'-biphenyl)-4-yl)-2-((S)-1-((4-bromophenyl)sulfonyl)piperidin-2-yl)acetate (6c)**

Following *GP-I* (1-((4-bromophenyl)sulfonyl)piperidine as substrate, reacting 2,2,2-trichloroethyl 2-([1,1'-biphenyl]-4-yl)-2-diazoacetate) with reaction under reflux dichloromethane (39 °C), the desired C2-product was obtained using 0-12% ethyl acetate in hexane as eluting gradient in flash column chromatography (a 2<sup>nd</sup> column with 35-100% dichloromethane in hexane was conducted if the product is not pure enough).

Characterization data for the *erythro*-diastereomer was conducted on sample obtained in Rh<sub>2</sub>(*R*-TPPTTL)<sub>4</sub>-catalyzed reaction (62% ee).

White solid: **m.p.** 52-54 °C

**R<sub>f</sub>** = 0.46 (20% ethyl acetate in hexane);

**[α]<sup>20</sup><sub>D</sub>**: +31.3° (c = 1.00, CHCl<sub>3</sub>, 62% ee);

**<sup>1</sup>H NMR** (600 MHz, CDCl<sub>3</sub>) δ 7.60 (dd, *J* = 8.3, 1.2 Hz, 2H), 7.51 (d, *J* = 8.4 Hz, 2H), 7.47 (t, *J* = 7.7 Hz, 2H), 7.43 (d, *J* = 8.3 Hz, 2H), 7.38 (tt, *J* = 6.9, 1.2 Hz, 1H), 7.27 (d, *J* = 8.7 Hz, 2H), 7.04 (d, *J* = 8.7 Hz, 2H), 4.99 (dd, *J* = 11.8, 4.8 Hz, 1H), 4.89 (d, *J* = 12.0 Hz, 1H), 4.59 (d, *J* = 12.0 Hz, 1H), 4.31 (d, *J* = 11.8 Hz, 1H), 3.50 – 3.43 (m, 1H), 2.95 (ddd, *J* = 14.7, 12.2, 3.8 Hz, 1H), 1.97 – 1.88 (m, 1H), 1.87 – 1.74 (m, 3H), 1.68 – 1.57 (m, 2H);

**<sup>13</sup>C NMR** (151 MHz, CDCl<sub>3</sub>) δ 170.4, 141.3, 140.2, 139.4, 134.0, 132.0, 129.3, 129.1, 128.9, 127.8, 127.5, 127.1, 127.1, 94.7, 74.4, 54.6, 50.9, 41.4, 27.7, 24.4, 18.9;

**IR (neat)** 3031, 2947, 2868, 1749, 1575, 1487, 1326, 1156, 1089, 1068, 1009, 933, 908, 760, 729 cm<sup>-1</sup>;

**HRMS (+p APCI)** calcd for C<sub>27</sub>H<sub>26</sub>BrCl<sub>3</sub>SNO<sub>4</sub> (M+H)<sup>+</sup> 643.9826 found 643.98294;

**HPLC** (R,R-Whelk column, 10% *i*-propanol in hexane, 1 mL min<sup>-1</sup>, 1 mg mL<sup>-1</sup>, 60 min, UV 230 nm) retention times of 41.77 min (minor) and 45.52 min (major) 62% ee with Rh<sub>2</sub>(*R*-TPPTTL)<sub>4</sub>.

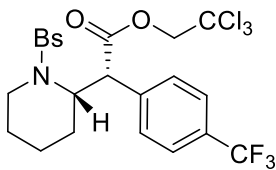

**2,2,2-Trichloroethyl  
(trifluoromethyl)phenyl)acetate (6d)**

**(R)-2-((S)-1-((4-bromophenyl)sulfonyl)piperidin-2-yl)-2-(4-**

Following *GP-I* (1-((4-bromophenyl)sulfonyl)piperidine as substrate, reacting 2,2,2-trichloroethyl 2-diazo-2-(4-(trifluoromethyl)phenyl)acetate), the desired C2-product was obtained using 0-12% ethyl acetate in hexane as eluting gradient in flash column chromatography (a 2<sup>nd</sup> column with 35-100% dichloromethane in hexane was conducted if the product is not pure enough).

Characterization data for the *erythro*-diastereomer was conducted on sample obtained in Rh<sub>2</sub>(*R*-TPPTTL)<sub>4</sub>-catalyzed reaction (74% ee).

White solid: **m.p.** 119-121 °C

**R<sub>f</sub>** = 0.43 (20% ethyl acetate in hexane);

**[α]<sub>D</sub><sup>20</sup>**: +11.8° (c = 1.00, CHCl<sub>3</sub>, 74% ee);

**<sup>1</sup>H NMR** (600 MHz, CDCl<sub>3</sub>) δ 7.55 (d, *J* = 8.3 Hz, 2H), 7.51 (d, *J* = 8.3 Hz, 2H), 7.41 (d, *J* = 8.7 Hz, 2H), 7.11 (d, *J* = 8.6 Hz, 2H), 4.95 (dd, *J* = 11.8, 4.7 Hz, 1H), 4.85 (d, *J* = 12.0 Hz, 1H), 4.60 (d, *J* = 12.0 Hz, 1H), 4.33 (d, *J* = 11.7 Hz, 1H), 3.54 – 3.46 (m, 1H), 2.90 (ddd, *J* = 14.9, 12.8, 3.4 Hz, 1H), 1.89 – 1.81 (m 1H), 1.80 – 1.71 (m, 3H), 1.59 – 1.49 (m, 2H);

**<sup>13</sup>C NMR** (151 MHz, CDCl<sub>3</sub>) δ 169.6, 139.2, 138.7, 132.1, 130.6 (q, *J* = 32.6 Hz), 129.2, 128.6, 127.4, 125.7 (q, *J* = 3.8 Hz), 123.9 (q, *J* = 272.2 Hz), 94.4, 74.3, 54.5, 51.0, 41.3, 27.1, 23.9, 18.6;

**<sup>19</sup>F NMR** (282 MHz, CDCl<sub>3</sub>) δ -62.45;

**IR (neat)** 2948, 2870, 1750, 1575, 1322, 1291, 1156, 1122, 1068, 907, 829, 766, 752, 730, 609, 535 cm<sup>-1</sup>;

**HRMS (+p APCI)** calcd for C<sub>22</sub>H<sub>21</sub>BrCl<sub>3</sub>F<sub>3</sub>SNO<sub>4</sub> (M+H)<sup>+</sup> 635.9387 found 635.93908;

**HPLC** (ADH column, 5% *i*-propanol in hexane, 1 mL min<sup>-1</sup>, 1 mg mL<sup>-1</sup>, 40 min, UV 230 nm) retention times of 26.67 min (major) and 29.89 min (minor) 74% ee with Rh<sub>2</sub>(*R*-TPPTTL)<sub>4</sub>.

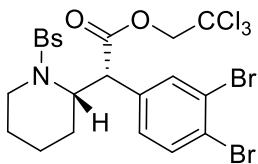

**2,2,2-Trichloroethyl  
dibromophenyl)acetate (6e)**

**(R)-2-((S)-1-((4-bromophenyl)sulfonyl)piperidin-2-yl)-2-(3,4-**

Following *GP-I* (1-((4-bromophenyl)sulfonyl)piperidine as substrate, reacting 2,2,2-trichloroethyl 2-diazo-2-(3,4-dibromophenyl)acetate), the desired C2-product was obtained using 0-12% ethyl acetate in hexane as eluting gradient in flash column chromatography (a 2<sup>nd</sup> column with 35-100% dichloromethane in hexane was conducted if the product is not pure enough).

Characterization data for the *erythro*-diastereomer was conducted on sample obtained in Rh<sub>2</sub>(*R*-TPPTTL)<sub>4</sub>-catalyzed reaction (67% ee).

White solid: **m.p.** 134-136 °C

**R<sub>f</sub>** = 0.40 (20% ethyl acetate in hexane);

**[α]<sup>20</sup><sub>D</sub>**: +11.4° (c = 1.00, CHCl<sub>3</sub>, 67% ee);

**<sup>1</sup>H NMR** (600 MHz, CDCl<sub>3</sub>) δ 7.59 (d, *J* = 2.2 Hz, 1H), 7.50 – 7.42 (m, 3H), 7.22 – 7.17 (m, 3H), 4.88 (d, *J* = 11.9 Hz, 1H), 4.81 (dd, *J* = 11.7, 4.7 Hz, 1H), 4.58 (d, *J* = 12.0 Hz, 1H), 4.18 (d, *J* = 11.7 Hz, 1H), 3.68 – 3.61 (m, 1H), 2.92 (ddd, *J* = 14.7, 13.0, 3.0 Hz, 1H), 1.87 – 1.79 (m, 1H), 1.77 – 1.70 (m, 3H), 1.63 – 1.56 (m, 1H), 1.54 – 1.46 (m, 1H);

**<sup>13</sup>C NMR** (151 MHz, CDCl<sub>3</sub>) δ 169.4, 139.5, 135.5, 133.8, 133.8, 132.1, 128.6, 128.2, 127.4, 125.1, 124.9, 94.3, 74.3, 55.0, 50.2, 41.4, 27.3, 24.2, 18.6;

**IR (neat)** 2945, 2869, 1749, 1575, 1464, 1326, 1155, 1089, 1068, 1010, 908, 821, 764, 729, 609 cm<sup>-1</sup>;

**HRMS (+p APCI)** calcd for C<sub>21</sub>H<sub>20</sub>Br<sub>3</sub>Cl<sub>3</sub>SNO<sub>4</sub> (M+H)<sup>+</sup> 723.7723 found 723.77275;

**HPLC** (ADH column, 5% *i*-propanol in hexane, 1 mL min<sup>-1</sup>, 1 mg mL<sup>-1</sup>, 60 min, UV 230 nm) retention times of 28.28 min (major) and 37.17 min (minor) 67% ee with Rh<sub>2</sub>(*R*-TPPTTL)<sub>4</sub>.

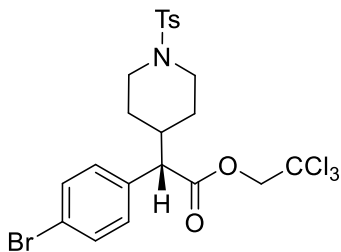

**2,2,2-Trichloroethyl (S)-2-(4-bromophenyl)-2-(1-tosylpiperidin-4-yl)acetate (13b)**

Following *GP-I* (1-tosylpiperidine as substrate, reacting 2,2,2-trichloroethyl 2-(4-bromophenyl)-2-diazoacetate,  $\text{Rh}_2(\text{S-2-Cl-5-BrTPCP})_4$  as catalyst), the desired C4-product was obtained using 0-10% ethyl acetate in hexane as eluting gradient in flash column chromatography.

Characterization data was conducted on sample obtained in  $\text{Rh}_2(\text{S-2-Cl-5-BrTPCP})_4$ -catalyzed reaction (96% ee).

White solid: **m.p.** 61-63 °C

**Rf** = 0.38 (20% ethyl acetate in hexane);

**$[\alpha]^{20}_{\text{D}}$** : -40.5° ( $c = 1.00$ ,  $\text{CHCl}_3$ , 96% ee);

**$^1\text{H NMR}$**  (600 MHz,  $\text{CDCl}_3$ )  $\delta$  7.61 (d,  $J = 8.2$  Hz, 2H), 7.44 (d,  $J = 8.5$  Hz, 2H), 7.31 (d,  $J = 7.8$  Hz, 2H), 7.16 (d,  $J = 8.5$  Hz, 2H), 4.74 (d,  $J = 12.0$  Hz, 1H), 4.61 (d,  $J = 12.0$  Hz, 1H), 3.85 – 3.78 (m, 1H), 3.75 – 3.67 (m, 1H), 3.34 (d,  $J = 10.6$  Hz, 1H), 2.43 (s, 3H), 2.27 (td,  $J = 12.0, 2.7$  Hz, 1H), 2.13 (td,  $J = 12.0, 2.7$  Hz, 1H), 2.00 – 1.87 (m, 2H), 1.48 (qd,  $J = 12.2, 4.2$  Hz, 1H), 1.34 (dp,  $J = 13.3, 2.8$  Hz, 1H), 1.18 (qd,  $J = 12.1, 4.3$  Hz, 1H);

**$^{13}\text{C NMR}$**  (151 MHz,  $\text{CDCl}_3$ )  $\delta$  171.0, 143.7, 134.9, 133.0, 132.1, 130.3, 129.8, 127.9, 122.2, 94.7, 74.3, 56.9, 46.2, 38.5, 30.4, 29.0, 21.7;

**IR (neat)** 2948, 2924, 2848, 1749, 1489, 1355, 1338, 1165, 932, 817, 726, 549  $\text{cm}^{-1}$ ;

**HRMS (+p APCI)** calcd for  $\text{C}_{22}\text{H}_{24}\text{BrCl}_3\text{NO}_4$  (M+H)<sup>+</sup> 581.9670 found 581.96752;

**HPLC** (OD column, 10% *i*-propanol in hexane, 1 mL  $\text{min}^{-1}$ , 1 mg  $\text{mL}^{-1}$ , 60 min, UV 230 nm) retention times of 21.61 min (major) and 37.29 min (minor) 96% ee with  $\text{Rh}_2(\text{S-2-Cl-5-BrTPCP})_4$ .

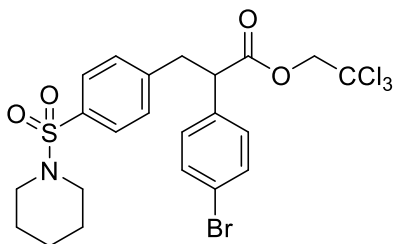

**2,2,2-Trichloroethyl 2-(4-bromophenyl)-3-(4-(piperidin-1-ylsulfonyl)phenyl)propanoate**

Following *GP-I* (1-tosylpiperidine as substrate, reacting 2,2,2-trichloroethyl 2-(4-bromophenyl)-2-diazoacetate,  $\text{Rh}_2(\text{S-2-Cl-5-BrTPCP})_4$  as catalyst), the primary benzylic insertion byproduct was obtained using 0-10% ethyl acetate in hexane as eluting gradient in flash column chromatography.

Characterization data was conducted on sample obtained in  $\text{Rh}_2(\text{S-2-Cl-5-BrTPCP})_4$ -catalyzed reaction (ee not determined).

White solid: **m.p.** 42-44 °C

**R<sub>f</sub>** = 0.33 (20% ethyl acetate in hexane);

**<sup>1</sup>H NMR** (600 MHz,  $\text{CDCl}_3$ )  $\delta$  7.63 (d,  $J$  = 8.4 Hz, 2H), 7.45 (d,  $J$  = 8.4 Hz, 2H), 7.28 (d,  $J$  = 8.3 Hz, 2H), 7.20 (d,  $J$  = 8.5 Hz, 2H), 4.72 (d,  $J$  = 12.0 Hz, 1H), 4.64 (d,  $J$  = 12.0 Hz, 1H), 3.98 (dd,  $J$  = 8.6, 7.1 Hz, 1H), 3.52 (dd,  $J$  = 13.9, 8.6 Hz, 1H), 3.14 (dd,  $J$  = 13.9, 7.1 Hz, 1H), 2.94 (t,  $J$  = 5.5 Hz, 4H), 1.63 (p,  $J$  = 5.9 Hz, 4H), 1.46 – 1.39 (m, 2H);

**<sup>13</sup>C NMR** (151 MHz,  $\text{CDCl}_3$ )  $\delta$  171.0, 143.2, 136.0, 135.0, 132.1, 129.9, 129.7, 128.0, 122.2, 94.7, 74.3, 52.5, 47.1, 39.1, 25.3, 23.7;

**IR (neat)** 2941, 2854, 1751, 1489, 1340, 1166, 1149, 930, 720, 588, 564  $\text{cm}^{-1}$ ;

**HRMS (+p APCI)** calcd for  $\text{C}_{22}\text{H}_{24}\text{BrCl}_3\text{SNO}_4$  (M+H)<sup>+</sup> 581.9670 found 581.96710;



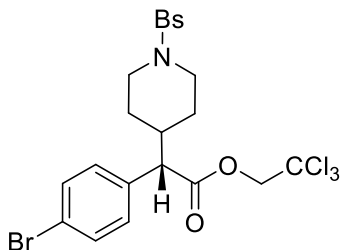

**2,2,2-Trichloroethyl (S)-2-(4-bromophenyl)-2-(1-((4-bromophenyl)sulfonyl)piperidin-4-yl)acetate (13a)**

Following *GP-I* (1-((4-bromophenyl)sulfonyl)piperidine) as substrate, reacting 2,2,2-trichloroethyl 2-(4-bromophenyl)-2-diazoacetate,  $\text{Rh}_2(\text{S-2-Cl-5-BrTPCP})_4$  as catalyst), the desired C4-product was obtained using 0-10% ethyl acetate in hexane as eluting gradient in flash column chromatography.

Characterization data was conducted on sample obtained in  $\text{Rh}_2(\text{S-2-Cl-5-BrTPCP})_4$ -catalyzed reaction (90% ee).

White solid: **m.p.** 154-156 °C

**Rf** = 0.46 (20% ethyl acetate in hexane);

**$[\alpha]_D^{20}$** : -29.1° ( $c = 1.00$ ,  $\text{CHCl}_3$ , 90% ee);

**$^1\text{H NMR}$**  (600 MHz,  $\text{CDCl}_3$ )  $\delta$  7.67 (d,  $J = 8.6$  Hz, 2H), 7.59 (d,  $J = 8.6$  Hz, 2H), 7.44 (d,  $J = 8.5$  Hz, 2H), 7.16 (d,  $J = 8.4$  Hz, 2H), 4.75 (d,  $J = 12.0$  Hz, 1H), 4.62 (d,  $J = 12.0$  Hz, 1H), 3.83 (ddt,  $J = 11.7, 4.6, 2.6$  Hz, 1H), 3.71 (ddt,  $J = 11.7, 4.5, 2.5$  Hz, 1H), 3.35 (d,  $J = 10.6$  Hz, 1H), 2.30 (td,  $J = 12.0, 2.7$  Hz, 1H), 2.17 (td,  $J = 12.0, 2.7$  Hz, 1H), 2.03 – 1.87 (m, 2H), 1.48 (qd,  $J = 12.3, 4.3$  Hz, 1H), 1.36 (dt,  $J = 13.4, 2.7$  Hz, 1H), 1.19 (qd,  $J = 12.2, 4.3$  Hz, 1H);

**$^{13}\text{C NMR}$**  (151 MHz,  $\text{CDCl}_3$ )  $\delta$  170.8, 135.1, 134.6, 132.3, 132.0, 130.1, 129.1, 127.9, 122.1, 94.5, 74.1, 56.7, 46.1, 46.0, 38.3, 30.2, 28.8;

**IR (neat)** 2949, 2849, 1749, 1575, 1489, 1358, 1341, 1166, 1011, 934, 825, 750, 595  $\text{cm}^{-1}$ ;

**HRMS (+p APCI)** calcd for  $\text{C}_{21}\text{H}_{21}\text{Br}_2\text{Cl}_3\text{SNO}_4$  (M+H)<sup>+</sup> 645.8618 found 645.86207;

**HPLC** (OD column, 15% *i*-propanol in hexane, 1  $\text{mL min}^{-1}$ , 1  $\text{mg mL}^{-1}$ , 60 min, UV 230 nm) retention times of 21.66 min (major) and 34.30 min (minor) 90% ee with  $\text{Rh}_2(\text{S-2-Cl-5-BrTPCP})_4$ .

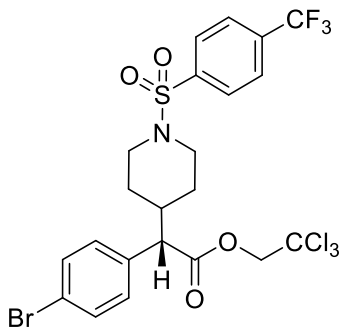

**2,2,2-Trichloroethyl (S)-2-(4-bromophenyl)-2-(1-((4-(trifluoromethyl)phenyl)sulfonyl)piperidin-4-yl)acetate (13c)**

Following *GP-I* (1-((4-(trifluoromethyl)phenyl)sulfonyl)piperidine as substrate, reacting 2,2,2-trichloroethyl 2-(4-bromophenyl)-2-diazoacetate,  $\text{Rh}_2(\text{S-2-Cl-5-BrTPCP})_4$  as catalyst), the desired C4-product was obtained using 0-10% ethyl acetate in hexane as eluting gradient in flash column chromatography.

Characterization data was conducted on sample obtained in  $\text{Rh}_2(\text{S-2-Cl-5-BrTPCP})_4$ -catalyzed reaction (96% ee).

White solid: **m.p.** 158-160 °C

**Rf** = 0.49 (20% ethyl acetate in hexane);

**$[\alpha]_D^{20}$** : -29.1° (c = 1.00,  $\text{CHCl}_3$ , 96% ee);

**$^1\text{H NMR}$**  (600 MHz,  $\text{CDCl}_3$ )  $\delta$  7.86 (d,  $J$  = 8.2 Hz, 2H), 7.80 (d,  $J$  = 8.2 Hz, 2H), 7.45 (d,  $J$  = 8.5 Hz, 2H), 7.16 (d,  $J$  = 8.4 Hz, 2H), 4.75 (d,  $J$  = 12.0 Hz, 1H), 4.62 (d,  $J$  = 12.0 Hz, 1H), 3.88 (ddt,  $J$  = 11.7, 4.4, 2.4 Hz, 1H), 3.76 (ddq,  $J$  = 11.7, 4.5, 2.5 Hz, 1H), 3.35 (d,  $J$  = 10.6 Hz, 1H), 2.34 (td,  $J$  = 12.0, 2.7 Hz, 1H), 2.20 (td,  $J$  = 12.0, 2.7 Hz, 1H), 2.07 – 1.88 (m, 2H), 1.50 (qd,  $J$  = 12.3, 4.3 Hz, 1H), 1.38 (dt,  $J$  = 13.4, 3.0 Hz, 1H), 1.20 (qd,  $J$  = 12.2, 4.3 Hz, 1H);

**$^{13}\text{C NMR}$**  (151 MHz,  $\text{CDCl}_3$ )  $\delta$  170.8, 139.8, 134.6, 134.5 (q,  $J$  = 33.0 Hz), 132.1, 130.1, 128.1, 126.2 (q,  $J$  = 3.6 Hz), 123.2 (d,  $J$  = 272.9 Hz), 122.2, 94.5, 74.1, 56.7, 46.1, 46.0, 38.2, 30.2, 28.8;

**$^{19}\text{F NMR}$**  (282 MHz,  $\text{CDCl}_3$ )  $\delta$  -63.12;

**IR (neat)** 2951, 1750, 1489, 1404, 1323, 1170, 1134, 1062, 726, 596  $\text{cm}^{-1}$ ;

**HRMS (+p APCI)** calcd for  $\text{C}_{22}\text{H}_{21}\text{BrCl}_3\text{F}_3\text{SNO}_4$  (M+H)<sup>+</sup> 635.9387 found 635.93897;

**HPLC** (R,R-Whelk column, 20% *i*-propanol in hexane, 1 mL  $\text{min}^{-1}$ , 1 mg  $\text{mL}^{-1}$ , 60 min, UV 230 nm) retention times of 31.20 min (major) and 50.10 min (minor) 96% ee with  $\text{Rh}_2(\text{S-2-Cl-5-BrTPCP})_4$ .

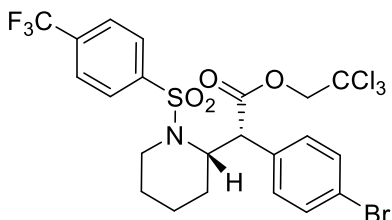

**2,2,2-Trichloroethyl (R)-2-(4-bromophenyl)-2-((S)-1-((4-(trifluoromethyl)phenyl)sulfonyl)piperidin-2-yl)acetate**

Following *GP-I* (1-((4-(trifluoromethyl)phenyl)sulfonyl)piperidine as substrate, reacting 2,2,2-trichloroethyl 2-(4-bromophenyl)-2-diazoacetate,  $\text{Rh}_2(\text{S-2-Cl-5-BrTPCP})_4$  as catalyst), the desired C2-product was obtained using 0-10% ethyl acetate in hexane as eluting gradient in flash column chromatography.

Characterization data was conducted on sample obtained in  $\text{Rh}_2(\text{S-2-Cl-5-BrTPCP})_4$ -catalyzed reaction (81% ee).

White solid: **m.p.** 136-138 °C

**Rf** = 0.45 (20% ethyl acetate in hexane);

**$[\alpha]_D^{20}$** : +22.5° (c = 0.66,  $\text{CHCl}_3$ , 81% ee);

**$^1\text{H NMR}$**  (600 MHz,  $\text{CDCl}_3$ )  $\delta$  7.58 (d,  $J$  = 8.2 Hz, 2H), 7.37 (dd,  $J$  = 10.4, 8.4 Hz, 4H), 7.23 (d,  $J$  = 8.5 Hz, 2H), 4.89 (dd,  $J$  = 11.6, 4.8 Hz, 1H), 4.85 (d,  $J$  = 12.0 Hz, 1H), 4.59 (d,  $J$  = 12.0 Hz, 1H), 4.22 (d,  $J$  = 11.7 Hz, 1H), 3.56 (dd,  $J$  = 14.9, 4.4 Hz, 1H), 2.93 (ddd,  $J$  = 14.7, 12.9, 3.1 Hz, 1H), 1.92 – 1.70 (m, 4H), 1.60 (d,  $J$  = 13.7 Hz, 1H), 1.58 – 1.48 (m, 2H);

**$^{13}\text{C NMR}$**  (151 MHz,  $\text{CDCl}_3$ )  $\delta$  169.8, 143.9, 134.0 (d,  $J$  = 33.1 Hz), 133.7, 131.9, 130.3, 127.5, 125.9 (q,  $J$  = 3.8 Hz), 123.2 (q,  $J$  = 273.0 Hz), 122.5, 94.4, 74.3, 54.9, 50.5, 41.4, 27.4, 24.2, 18.6;

**$^{19}\text{F NMR}$**  (282 MHz,  $\text{CDCl}_3$ )  $\delta$  -62.99;

**IR (neat)** 2947, 1752, 1489, 1323, 1161, 1136, 1063, 934, 720  $\text{cm}^{-1}$ ;

**HRMS (+p APCI)** calcd for  $\text{C}_{22}\text{H}_{21}\text{BrCl}_3\text{F}_3\text{SNO}_4$  (M+H)<sup>+</sup> 635.9387 found 635.93888;

**HPLC** (ADH column, 5% *i*-propanol in hexane, 1 mL  $\text{min}^{-1}$ , 1 mg  $\text{mL}^{-1}$ , 60 min, UV 230 nm) retention times of 16.01 min (major) and 31.83 min (minor) 81% ee with  $\text{Rh}_2(\text{S-2-Cl-5-BrTPCP})_4$ .

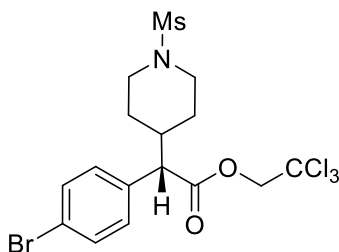

**2,2,2-Trichloroethyl (S)-2-(4-bromophenyl)-2-(1-(methylsulfonyl)piperidin-4-yl)acetate (13d)**

Following *GP-I* (1-(methylsulfonyl)piperidine as substrate, reacting 2,2,2-trichloroethyl 2-(4-bromophenyl)-2-diazoacetate,  $\text{Rh}_2(\text{S-2-Cl-5-BrTPCP})_4$  as catalyst), the desired C4-product was obtained using 0-10% ethyl acetate in hexane as eluting gradient in flash column chromatography.

Characterization data was conducted on sample obtained in  $\text{Rh}_2(\text{S-2-Cl-5-BrTPCP})_4$ -catalyzed reaction (97% ee).

White solid: **m.p.** 170-172 °C

**Rf** = 0.08 (20% ethyl acetate in hexane);

**$[\alpha]^{20}_{\text{D}}$** : +18.6° (c = 1.00,  $\text{CHCl}_3$ , 97% ee);

**$^1\text{H NMR}$**  (600 MHz,  $\text{CDCl}_3$ )  $\delta$  7.48 (d,  $J$  = 8.4 Hz, 2H), 7.22 (d,  $J$  = 8.5 Hz, 2H), 4.78 (d,  $J$  = 12.0 Hz, 1H), 4.65 (d,  $J$  = 11.9 Hz, 1H), 3.88 – 3.80 (m, 1H), 3.77 – 3.70 (m, 1H), 3.40 (d,  $J$  = 10.7 Hz, 1H), 2.76 (s, 3H), 2.70 (td,  $J$  = 12.1, 2.7 Hz, 1H), 2.57 (td,  $J$  = 12.1, 2.7 Hz, 1H), 2.20 – 2.12 (m, 2H), 1.98 (dt,  $J$  = 13.1, 3.0 Hz, 1H), 1.49 (qd,  $J$  = 12.1, 4.3 Hz, 1H), 1.42 (dt,  $J$  = 13.3, 2.2 Hz, 1H), 1.20 (qd,  $J$  = 12.1, 4.3 Hz, 1H);

**$^{13}\text{C NMR}$**  (151 MHz,  $\text{CDCl}_3$ )  $\delta$  170.9, 134.7, 132.1, 130.2, 122.2, 94.6, 74.2, 56.8, 45.9, 45.8, 38.5, 34.8, 30.5, 29.0;

**IR (neat)** 3023, 2948, 2851, 1748, 1489, 1332, 1255, 1216, 1155, 957, 934, 827, 759, 723, 517, 505  $\text{cm}^{-1}$ ;

**HRMS (+p APCI)** calcd for  $\text{C}_{16}\text{H}_{20}\text{BrCl}_3\text{NO}_4$  (M+H)<sup>+</sup> 505.9357 found 505.93616;

**HPLC** (R,R-Whelk column, 20% *i*-propanol in hexane, 1 mL  $\text{min}^{-1}$ , 1 mg  $\text{mL}^{-1}$ , 80 min, UV 230 nm) retention times of 41.56 min (major) and 53.30 min (minor) 97% ee with  $\text{Rh}_2(\text{S-2-Cl-5-BrTPCP})_4$ .

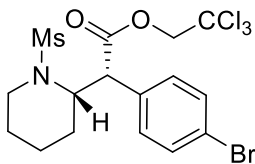

**2,2,2-Trichloroethyl (*R*)-2-(4-bromophenyl)-2-((*S*)-1-(methylsulfonyl)piperidin-2-yl)acetate**

Following *GP-I* (1-(methylsulfonyl)piperidine as substrate, reacting 2,2,2-trichloroethyl 2-(4-bromophenyl)-2-diazoacetate,  $\text{Rh}_2(\text{S-2-Cl-5-BrTPCP})_4$  as catalyst), the desired C2-product was obtained using 0-10% ethyl acetate in hexane as eluting gradient in flash column chromatography.

Characterization data was conducted on sample obtained in  $\text{Rh}_2(\text{S-2-Cl-5-BrTPCP})_4$ -catalyzed reaction (80% ee).

White solid: **m.p.** 84-86 °C

**R<sub>f</sub>** = 0.18 (20% ethyl acetate in hexane);

**[ $\alpha$ ]<sup>20</sup><sub>D</sub>**: +11.8° (c = 1.00,  $\text{CHCl}_3$ , 80% ee);

**<sup>1</sup>H NMR** (600 MHz,  $\text{CDCl}_3$ )  $\delta$  7.51 (d,  $J$  = 8.5 Hz, 2H), 7.38 (d,  $J$  = 8.5 Hz, 2H), 4.91 – 4.82 (m, 2H), 4.61 (d,  $J$  = 12.0 Hz, 1H), 4.24 (d,  $J$  = 11.8 Hz, 1H), 3.56 (dd,  $J$  = 14.7, 4.4 Hz, 1H), 2.95 – 2.86 (m, 1H), 2.06 (s, 3H), 1.92 – 1.84 (m, 1H), 1.84 – 1.76 (m, 3H), 1.72 – 1.59 (m, 2H);

**<sup>13</sup>C NMR** (151 MHz,  $\text{CDCl}_3$ )  $\delta$  170.0, 134.6, 132.2, 130.8, 122.7, 94.6, 74.4, 55.1, 50.7, 41.0, 39.9, 28.2, 25.2, 18.9;

**IR (neat)** 2938, 2856, 1749, 1489, 1320, 1146, 1053, 959, 940, 777, 715, 519  $\text{cm}^{-1}$ ;

**HRMS (+p APCI)** calcd for  $\text{C}_{16}\text{H}_{20}\text{BrCl}_3\text{SNO}_4$  (M+H)<sup>+</sup> 505.9357 found 505.93578;

**HPLC** (ADH column, 5% *i*-propanol in hexane, 1 mL min<sup>-1</sup>, 1 mg mL<sup>-1</sup>, 45 min, UV 230 nm) retention times of 28.79 min (major) and 33.36 min (minor) 80% ee with  $\text{Rh}_2(\text{S-2-Cl-5-BrTPCP})_4$ .

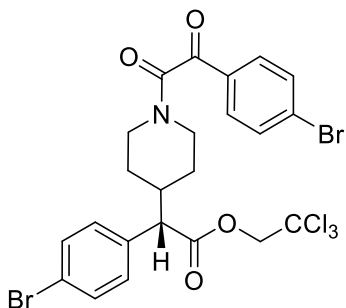

**2,2,2-Trichloroethyl (S)-2-(4-bromophenyl)-2-(1-(2-(4-bromophenyl)-2-oxoacetyl)piperidin-4-yl)acetate (13e)**

Following *GP-I* (1-(4-bromophenyl)-2-(piperidin-1-yl)ethane-1,2-dione as substrate, reacting 2,2,2-trichloroethyl 2-(4-bromophenyl)-2-diazoacetate,  $\text{Rh}_2(\text{S-2-Cl-5-BrTPCP})_4$  as catalyst) with reaction under reflux dichloromethane (39 °C) and 1.5: 1 (diazoacetate: protected-piperidine), the desired C4-product was obtained using 0-10% ethyl acetate in hexane as eluting gradient in flash column chromatography.

Characterization data was conducted on sample obtained in  $\text{Rh}_2(\text{S-2-Cl-5-BrTPCP})_4$ -catalyzed reaction (97% ee) as mixture with 1:1 ratio of rotamers.

White solid: **m.p.** 58-60 °C

**R<sub>f</sub>** = 0.31 (20% ethyl acetate in hexane);

**[ $\alpha$ ]<sup>20<sub>D</sub></sup>**: +46.1° (c = 1.00,  $\text{CHCl}_3$ , 97% ee);

**<sup>1</sup>H NMR** (600 MHz,  $\text{CDCl}_3$ ) (mixture of both rotamers with 1:1 ratio)  $\delta$  7.79 (dd,  $J$  = 13.0, 8.5 Hz, 2H), 7.65 (dd,  $J$  = 9.9, 8.5 Hz, 2H), 7.47 (dd,  $J$  = 23.4, 8.5 Hz, 2H), 7.22 (dd,  $J$  = 13.7, 8.4 Hz, 2H), 4.81 (d,  $J$  = 12.0 Hz, 0.5H), 4.75 (d,  $J$  = 12.0 Hz, 0.5H), 4.73 – 4.67 (m, 0.5H), 4.64 (t,  $J$  = 11.9 Hz, 1H), 4.61 – 4.54 (m, 0.5H), 3.60 (dt,  $J$  = 13.7, 2.2 Hz, 0.5H), 3.48 (dt,  $J$  = 13.7, 2.1 Hz, 0.5H), 3.41 (dd,  $J$  = 10.6, 3.1 Hz, 1H), 3.17 – 3.07 (m, 0.5H), 3.03 – 2.93 (m, 0.5H), 2.84 (td,  $J$  = 13.1, 2.9 Hz, 0.5H), 2.70 (td,  $J$  = 13.0, 2.9 Hz, 0.5H), 2.35 (qt,  $J$  = 11.5, 3.7 Hz, 1H), 2.04 (dt,  $J$  = 13.4, 2.8 Hz, 0.5H), 1.89 (dt,  $J$  = 13.1, 2.9 Hz, 0.5H), 1.52 – 1.28 (m, 2H), 1.14 (qd,  $J$  = 12.5, 4.4 Hz, 0.5H), 1.06 (qd,  $J$  = 12.5, 4.3 Hz, 0.5H);

**<sup>13</sup>C NMR** (151 MHz,  $\text{CDCl}_3$ ) (mixture of both rotamers with 1:1 ratio)  $\delta$  190.3, (190.3), 170.8, (170.8), 164.7, (164.7), 134.5, (134.5), 132.4, (132.4), 132.1, (132.1), 131.9, (131.9), 131.0, (130.9), 130.3, (130.3), 130.1, (130.1), 122.2, (122.2), 94.6, (94.5), 74.2, (74.1), 56.8, (56.8), 45.9, (45.8), 41.3, (41.2), 39.1, (39.0), 31.1, (30.5), 29.8, (29.0);

**IR (neat)** 2949, 2867, 1749, 1681, 1643, 1585, 1488, 1449, 1399, 1267, 1228, 1140, 1071, 762  $\text{cm}^{-1}$ ;

**HRMS (+p APCI)** calcd for  $\text{C}_{22}\text{H}_{21}\text{Br}_2\text{Cl}_3\text{NO}_4$  (M)<sup>+</sup> 637.8897 found 637.88974;

**HPLC** (ADH column, 5% *i*-propanol in hexane, 1 mL  $\text{min}^{-1}$ , 1 mg  $\text{mL}^{-1}$ , 80 min, UV 230 nm) retention times of 49.67 min (major) and 60.07 min (minor) 97% ee with  $\text{Rh}_2(\text{S-2-Cl-5-BrTPCP})_4$ .

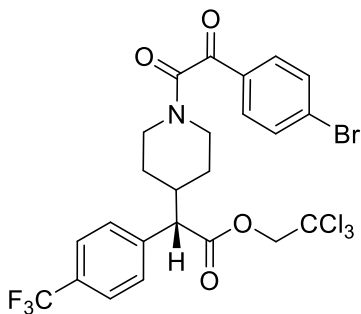

**2,2,2-Trichloroethyl (S)-2-(1-(2-(4-bromophenyl)-2-oxoacetyl)piperidin-4-yl)-2-(4-(trifluoromethyl)phenyl)acetate (13f)**

Following *GP-I* (1-(4-bromophenyl)-2-(piperidin-1-yl)ethane-1,2-dione as substrate, reacting 2,2,2-trichloroethyl 2-diazo-2-(4-(trifluoromethyl)phenyl)acetate,  $\text{Rh}_2(\text{S-2-Cl-5-BrTPCP})_4$  as catalyst) with reaction under reflux dichloromethane (39 °C) and 1.5: 1 (diazoacetate: protected-piperidine), the desired C4-product was obtained using 0-10% ethyl acetate in hexane as eluting gradient in flash column chromatography.

Characterization data was conducted on sample obtained in  $\text{Rh}_2(\text{S-2-Cl-5-BrTPCP})_4$ -catalyzed reaction (96% ee) as mixture with 1:1 ratio of rotamers.

White solid: **m.p.** 50-52 °C

**Rf** = 0.37 (20% ethyl acetate in hexane);

$[\alpha]_D^{20}$ : +42.3° (c = 1.00,  $\text{CHCl}_3$ , 96% ee);

**$^1\text{H NMR}$**  (600 MHz,  $\text{CDCl}_3$ ) (mixture of both rotamers with 1:1 ratio)  $\delta$  7.79 (dd,  $J$  = 15.6, 8.6 Hz, 2H), 7.68 – 7.62 (m, 3H), 7.62 – 7.58 (m, 1H), 7.48 (dd,  $J$  = 12.7, 8.1 Hz, 2H), 4.83 (d,  $J$  = 12.0 Hz, 0.5H), 4.77 (d,  $J$  = 12.0 Hz, 0.5H), 4.72 (ddt,  $J$  = 13.4, 4.6, 2.4 Hz, 0.5H), 4.68 – 4.58 (m, 1.5H), 3.62 (ddt,  $J$  = 13.8, 4.4, 2.3 Hz, 0.5H), 3.53 (dd,  $J$  = 10.6, 3.4 Hz, 1H), 3.49 (ddt,  $J$  = 13.9, 4.6, 2.4 Hz, 0.5H), 3.13 (ddd,  $J$  = 13.7, 12.4, 2.9 Hz, 0.5H), 2.99 (ddd,  $J$  = 13.8, 12.3, 2.8 Hz, 0.5H), 2.89 – 2.81 (m, 0.5H), 2.71 (ddd,  $J$  = 13.4, 12.5, 3.0 Hz, 0.5H), 2.46 – 2.36 (m, 1H), 2.07 (dt,  $J$  = 13.5, 2.8 Hz, 0.5H), 1.92 (dt,  $J$  = 13.1, 3.0 Hz, 0.5H), 1.51 – 1.35 (m, 1.5H), 1.29 (dt,  $J$  = 13.3, 3.0 Hz, 0.5H), 1.17 (dtd,  $J$  = 13.6, 12.3, 4.5 Hz, 0.5H), 1.09 (dtd,  $J$  = 13.3, 12.2, 4.4 Hz, 0.5H);

**$^{13}\text{C NMR}$**  (151 MHz,  $\text{CDCl}_3$ ) (mixture of both rotamers with 1:1 ratio)  $\delta$  190.5, (190.5), 170.7, (170.7), 164.9, (164.9), 139.7, (139.7), 132.6, (132.6), 132.1, (132.0), 131.1, (131.1), 130.7 (d,  $J$  = 32.7 Hz), (130.6 (d,  $J$  = 32.7 Hz)), 130.5, (130.5), 129.1, 126.1 (q,  $J$  = 3.7 Hz), (126.0 (q,  $J$  = 3.9 Hz)), 124.0 (d,  $J$  = 272.2 Hz), (124.0 (d,  $J$  = 272.2 Hz)), 94.6, (94.6), 74.4, (74.3), 57.4, (57.4), 46.0, (46.0), 41.4, (41.3), 39.4, (39.3), 31.3, (30.6), 30.0, (29.2);

**IR (neat)** 2950, 2869, 1751, 1682, 1643, 1586, 1325, 1127, 1068, 760  $\text{cm}^{-1}$ ;

**HRMS (+p APCI)** calcd for  $\text{C}_{24}\text{H}_{21}\text{BrCl}_3\text{F}_3\text{NO}_4$  (M+H)<sup>+</sup> 627.9666 found 627.96735;

**HPLC** (ODH column, 10% *i*-propanol in hexane, 1  $\text{mL min}^{-1}$ , 1  $\text{mg mL}^{-1}$ , 45 min, UV 230 nm) retention times of 18.09 min (minor) and 28.06 min (major) 96% ee with  $\text{Rh}_2(\text{S-2-Cl-5-BrTPCP})_4$ .

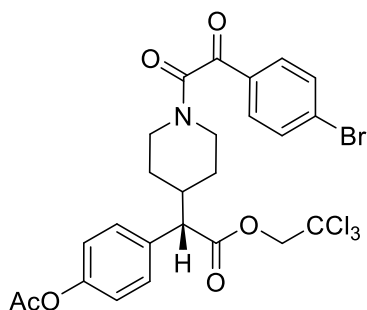

**2,2,2-Trichloroethyl (S)-2-(4-acetoxyphenyl)-2-(1-(2-(4-bromophenyl)-2-oxoacetyl)piperidin-4-yl)acetate (13g)**

Following *GP-I* (1-(4-bromophenyl)-2-(piperidin-1-yl)ethane-1,2-dione as substrate, reacting 2,2,2-trichloroethyl 2-(4-acetoxyphenyl)-2-diazoacetate,  $\text{Rh}_2(\text{S-2-Cl-5-BrTPCP})_4$  as catalyst) with reaction under reflux dichloromethane (39 °C) and 1.5: 1 (diazoacetate: protected-piperidine), the desired C4-product was obtained using 0-10% ethyl acetate in hexane as eluting gradient in flash column chromatography.

Characterization data was conducted on sample obtained in  $\text{Rh}_2(\text{S-2-Cl-5-BrTPCP})_4$ -catalyzed reaction (75% ee) as mixture with 1:1 ratio of rotamers.

White solid: **m.p.** 55-58 °C

**R<sub>f</sub>** = 0.18 (20% ethyl acetate in hexane);

**[α]<sup>20</sup><sub>D</sub>**: +29.8° (c = 0.45,  $\text{CHCl}_3$ , 75% ee);

**<sup>1</sup>H NMR** (600 MHz,  $\text{CDCl}_3$ ) (mixture of both rotamers with 1:1 ratio) δ 7.79 (dd, *J* = 13.8, 8.6 Hz, 2H), 7.66 (dd, *J* = 10.2, 8.6 Hz, 2H), 7.35 (dd, *J* = 14.0, 8.6 Hz, 2H), 7.07 (dd, *J* = 25.2, 8.6 Hz, 2H), 4.85 (d, *J* = 12.0 Hz, 0.5H), 4.79 (d, *J* = 12.0 Hz, 0.5H), 4.71 (ddt, *J* = 13.4, 4.5, 2.2 Hz, 0.5H), 4.64 – 4.57 (m, 1.5H), 3.60 (ddt, *J* = 13.7, 4.4, 2.3 Hz, 0.5H), 3.51 – 3.41 (m, 1.5H), 3.13 (ddd, *J* = 13.8, 12.4, 2.9 Hz, 0.5H), 2.98 (ddd, *J* = 13.8, 12.3, 2.8 Hz, 0.5H), 2.84 (td, *J* = 13.1, 3.0 Hz, 0.5H), 2.71 (td, *J* = 13.1, 3.0 Hz, 0.5H), 2.40 – 2.32 (m, 1H), 2.31 (s, 1.5H), 2.29 (s, 1.5H), 2.05 (dt, *J* = 13.4, 3.1 Hz, 0.5H), 1.90 (dt, *J* = 13.0, 2.9 Hz, 0.5H), 1.51 (dt, *J* = 13.0, 2.7 Hz, 0.5H), 1.48 – 1.31 (m, 1.5H), 1.15 (dtd, *J* = 13.7, 12.3, 4.4 Hz, 0.5H), 1.06 (qd, *J* = 12.5, 4.3 Hz, 0.5H);

**<sup>13</sup>C NMR** (151 MHz,  $\text{CDCl}_3$ ) (mixture of both rotamers with 1:1 ratio) δ 190.4, (190.4), 171.1, (171.0), 169.3, (169.3), 164.8, (164.7), 150.5, (150.4), 133.0, (133.0), 132.5, (132.4), 131.9, (131.9), 131.0, (131.0), 130.3, (130.3), 129.5, (129.5), 122.1, (122.0), 94.6, (94.6), 74.2, (74.1), 56.8, 46.0, (45.9), 41.3, (41.2), 39.3, (39.2), 31.1, (30.5), 29.9, (29.1), 21.2, (21.1);

**IR** (neat) 2950, 1750, 1682, 1641, 1586, 1506, 1370, 1201, 1170, 1139, 911, 728  $\text{cm}^{-1}$ ;

**HRMS** (+p APCI) calcd for  $\text{C}_{25}\text{H}_{24}\text{BrCl}_3\text{NO}_6$  (M+H)<sup>+</sup> 617.9847 found 617.98471;

**HPLC** (ODH column, 15% *i*-propanol in hexane, 1  $\text{mL min}^{-1}$ , 1  $\text{mg mL}^{-1}$ , 80 min, UV 230 nm) retention times of 23.99 min (minor) and 45.95 min (major) 75% ee with  $\text{Rh}_2(\text{S-2-Cl-5-BrTPCP})_4$ .



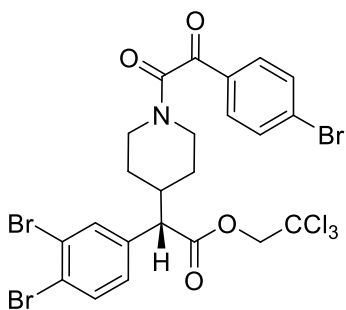

**2,2,2-trichloroethyl  
dibromophenyl)acetate (13h)**

**(S)-2-(1-(2-(4-bromophenyl)-2-oxoacetyl)piperidin-4-yl)-2-(3,4-**

Following *GP-I* (1-(4-bromophenyl)-2-(piperidin-1-yl)ethane-1,2-dione as substrate, reacting 2,2,2-trichloroethyl 2-diazo-2-(3,4-dibromophenyl)acetate,  $\text{Rh}_2(\text{S-2-Cl-5-BrTPCP})_4$  as catalyst) with reaction under reflux dichloromethane (39 °C) and 1.5: 1 (diazoacetate: protected-piperidine), the desired C4-product was obtained using 0-10% ethyl acetate in hexane as eluting gradient in flash column chromatography.

Characterization data was conducted on sample obtained in  $\text{Rh}_2(\text{S-2-Cl-5-BrTPCP})_4$ -catalyzed reaction (98% ee) as mixture with 1:1 ratio of rotamers.

White solid: **m.p.** 62-64 °C

**Rf** = 0.31 (20% ethyl acetate in hexane);

**$[\alpha]_D^{20}$** : +42.6° (c = 1.00,  $\text{CHCl}_3$ , 98% ee);

**$^1\text{H NMR}$**  (500 MHz,  $\text{CDCl}_3$ ) (mixture of both rotamers with 1:1 ratio)  $\delta$  7.79 (dd,  $J = 10.9, 8.6$  Hz, 2H), 7.68 – 7.55 (m, 4H), 7.15 (ddd,  $J = 9.3, 8.2, 2.1$  Hz, 1H), 4.84 (d,  $J = 11.9$  Hz, 0.5H), 4.78 (d,  $J = 12.0$  Hz, 0.5H), 4.74 – 4.68 (m, 0.5H), 4.68 – 4.58 (m, 1.5H), 3.65 – 3.57 (m, 0.5H), 3.55 – 3.46 (m, 0.5H), 3.39 (dd,  $J = 10.6, 1.9$  Hz, 1H), 3.12 (ddd,  $J = 13.8, 12.3, 2.9$  Hz, 0.5H), 3.00 (ddd,  $J = 13.8, 12.3, 2.8$  Hz, 0.5H), 2.87 – 2.78 (m, 0.5H), 2.77 – 2.67 (m, 0.5H), 2.39 – 2.27 (m, 1H), 2.07 – 1.98 (m, 0.5H), 1.91 – 1.84 (m, 0.5H), 1.53 – 1.47 (m, 0.5H), 1.47 – 1.30 (m, 1.5H), 1.13 (dq,  $J = 42.3, 12.5, 4.4$  Hz, 1H);

**$^{13}\text{C NMR}$**  (126 MHz,  $\text{CDCl}_3$ ) (mixture of both rotamers with 1:1 ratio)  $\delta$  190.3, (190.3), 170.3, (170.3), 164.7, (164.7), 136.4, (136.4), 134.1, (134.0), 133.5, (133.5), 132.5, 131.9, (131.9), 131.0, (131.0), 130.4, 128.7, (128.7), 125.5, (125.4), 124.7, (124.6), 94.5, (94.4), 74.3, (74.2), 56.5, 45.9, (45.8), 41.2, (41.1), 39.2, (39.1), 31.1, (30.4), 29.9, (29.0);

**IR** (neat) 3010, 2949, 2867, 1750, 1682, 1643, 1585, 1486, 1141, 761  $\text{cm}^{-1}$ ;

**HRMS** (+p APCI) calcd for  $\text{C}_{23}\text{H}_{20}\text{Br}_3\text{Cl}_3\text{NO}_4$  (M+H)<sup>+</sup> 715.8003 found 715.80147;

**HPLC** (R,R-Whelk column, 20% *i*-propanol in hexane, 1  $\text{mL min}^{-1}$ , 1  $\text{mg mL}^{-1}$ , 100 min, UV 230 nm) retention times of 66.36 min (major) and 84.85 min (minor) 98% ee with  $\text{Rh}_2(\text{S-2-Cl-5-BrTPCP})_4$ .

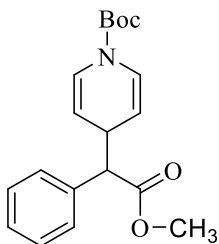

***tert*-Butyl 4-(2-methoxy-2-oxo-1-phenylethyl)pyridine-1(4H)-carboxylate (11)**

Following *GP-IV*, the desired insertion product was obtained in  $\text{Rh}_2(\text{S-DOSP})_4$ -catalyzed reaction once for  $^1\text{H}$  NMR characterization. However, the product decomposed too fast for a ideal  $^{13}\text{C}$  NMR and other characterizations.

$^1\text{H}$  NMR (500 MHz,  $\text{CDCl}_3$ )  $\delta$  7.31 – 7.11 (m, 5H), 6.63 (dd,  $J = 103.6, 34.2$  Hz, 2H), 4.85 (d,  $J = 42.6$  Hz, 1H), 4.32 (d,  $J = 49.2$  Hz, 1H), 3.59 (s, 4H), 3.45 (d,  $J = 10.3$  Hz, 1H), 1.42 (s, 9H).

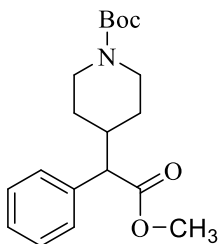

***tert*-Butyl 4-(2-methoxy-2-oxo-1-phenylethyl)piperidine-1-carboxylate (12)**

Following *GP-IV* at 0 °C, the desired insertion product was obtained in  $\text{Rh}_2(\text{S-DOSP})_4$ -catalyzed and followed by hydrogenation to get the sample for characterization data: *tert*-butyl 4-(2-methoxy-2-oxo-1-phenylethyl)pyridine-1(4H)-carboxylate (84 mg, 0.255 mmol, 1 equiv.) was dissolved in dry methanol (5 mL) and Pd/C (27 mg, 10 mol%, 10 wt%) was added. The flask was evacuated and flushed with hydrogen several times. Two hydrogen filled balloons were connected to the flask and the mixture was stirred under hydrogen atmosphere overnight. The palladium was filtered off by a short celite plug which was washed thoroughly with diethyl ether. The solvent was removed under reduced pressure to give a colorless solid in quantitative yields.

White solid: **m.p.:** 69-72 °C

**Rf** = 0.47 (10% ethyl acetate in hexane);

**$[\alpha]^{20}_{\text{D}}$ :** +31.8° ( $c = 1.00$ ,  $\text{CHCl}_3$ , 61% ee).

$^1\text{H}$  NMR (600 MHz,  $\text{CDCl}_3$ )  $\delta$  7.35 – 7.22 (m, 5H), 4.04 (s, 2H), 3.64 (s, 3H), 3.23 (d,  $J = 10.6$  Hz, 1H), 2.65 (d,  $J = 99.6$  Hz, 2H), 2.14 (qt,  $J = 11.4, 3.5$  Hz, 1H), 1.76 (d,  $J = 13.5$  Hz, 1H), 1.42 (s, 9H), 1.21 (tt,  $J = 12.9, 6.2$  Hz, 2H), 0.94 (q,  $J = 13.2$  Hz, 1H);

$^{13}\text{C}$  NMR (75 MHz,  $\text{CDCl}_3$ )  $\delta$  173.8, 154.7, 137.0, 128.7, 128.4, 127.5, 79.3, 57.8, 51.9, 39.4, 31.0, 29.5, 28.4;

**IR (neat)** 2972, 2931, 2853, 1733, 1692, 1447, 1413, 1391, 1365, 1285, 1247, 1156, 1128, 1086, 1019, 991, 965, 949, 902, 870, 771, 741, 703, 531  $\text{cm}^{-1}$ ;

**FTMS (+p NSI)** calcd for  $\text{C}_{19}\text{H}_{28}\text{NO}_4$  (M+H)<sup>+</sup> 334.2013 found 334.20168;

**HPLC** (R,R-Whelk column, 5% *i*-propanol in hexane, 1 mL min<sup>-1</sup>, 1 mg mL<sup>-1</sup>, 45 min, UV 230 nm) retention times of 24.65 min (minor) and 27.08 min (major) 61% ee with  $\text{Rh}_2(\text{S-DOSP})_4$ .

## 5. Cyclopropanation and Ring-Opening Reactions for C3-Analogs

### 5.1 General Procedures

#### *General Procedure for Cyclopropanation Reactions:*

In a 25 mL round bottom flask under argon atmosphere, Boc-1,2,3,4-tetrahydropyridine (137 mg, 0.75 mmol, 1.5 equiv.) and 0.5 mol% Rh<sub>2</sub>L<sub>4</sub> were dissolved in 2 mL dry solvent under indicated temperature. Corresponding donor/acceptor diazo compounds (0.5 mmol, 1.0 equiv.) was dissolved in 12 mL dry solvent under argon atmosphere and added over 2 h via a syringe pump under indicated temperature. After addition, the reaction mixture was stirred for another 30 min, and crude <sup>1</sup>H NMR was obtained after the resulted mixture was concentrated under vacuum. Finally, the desired product was obtained after purification using flash column chromatography with 1-15% ethyl acetate in hexane as eluting gradient.

#### *General Procedure for Ring-opening Reactions:*

In a flame-dried 10-mL round bottom flask, corresponding cyclopropanation product from last step (1 equiv.) was dissolved in dry dichloromethane (5 mL). BF<sub>3</sub>-OEt<sub>2</sub> (2 equiv.) and triethylsilane (10 equiv.) were added. The mixture was stirred for 3 days at 23 °C. The crude product was purified by flash column chromatography (20% ethyl acetate in hexane to remove byproducts, then the product was eluted with 2% triethylamine in ethyl acetate). Further purification was done by a 2<sup>nd</sup> flash column chromatography (10% methanol in dichloromethane).

### 5.2. Diastereomer and Enantiomer Ratios Determination

Diastereomer ratio was determined from crude <sup>1</sup>H NMR spectra.

Enantiomer ratio were determined by chiral HPLC on purified samples without derivatization (cyclopropanation products), or after derivatizing the secondary amine to 2,2,2-trifluoroacetamide (ring-opening products).

#### *General Procedure for Derivatizing the Secondary Amine to 2,2,2-Trifluoroacetamide:*

Triethylamine (1 equiv.) and corresponding amine from ring-opening reactions (1 equiv.) were dissolved in 2 mL dichloromethane and cooled to 0 °C. Trifluoroacetic acid anhydride (1.2 equiv.) was added dropwise. The mixture was stirred at 0 °C for 1 h and was allowed to warm up to 23 °C. At 23 °C, the mixture was stirred overnight. The solvent was evaporated under reduced pressure and the crude product was purified by flash column chromatography (5-10% ethyl acetate in hexane as eluting gradient).

### 5.3. Characterization Data for Cyclopropanation and Ring-Opening Products

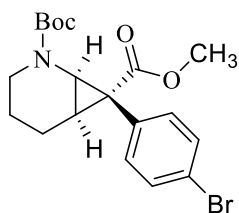

#### 2-(*tert*-Butyl) 7-methyl (1*R*,6*R*,7*S*)-7-(4-bromophenyl)-2-azabicyclo[4.1.0]heptane-2,7-dicarboxylate (8a)

Following *General Procedure for Cyclopropanation Reactions* (methyl 2-(4-bromophenyl)-2-diazoacetate (128 mg), Rh<sub>2</sub>(*S*-DOSP)<sub>4</sub> as catalyst, pentane as solvent, at 0 °C), the desired cyclopropanation product was obtained for characterization (92% ee).

White solid: **m.p.** 113-118 °C

**R<sub>f</sub>** = 0.11 (5% ethyl acetate in hexane);

[ $\alpha$ ]<sub>D</sub><sup>20</sup>: +135.2° (c = 1.00, CHCl<sub>3</sub>, 92% ee);

**<sup>1</sup>H NMR** (600 MHz, CDCl<sub>3</sub>) *Rotamer1* : (*Rotamer2*) (1.04:1)  $\delta$  7.39 (d, *J* = 8.4 Hz, 2H), (7.36 (d, *J* = 8.5 Hz, 2H)), 7.10 (d, *J* = 8.4 Hz, 2H), (7.08 (d, *J* = 8.4 Hz, 2H)), 3.65 (d, *J* = 9.2 Hz, 1H), (3.60 (d, *J* = 9.3 Hz, 1H)), (3.50 (s, 3H)), 3.48 (s, 3H), 3.18 (dt, *J* = 12.5, 4.4 Hz, 1H), (3.08 (dt, *J* = 12.4, 4.4 Hz, 1H)), 2.72 – 2.52 (m, 2H) (both rotamers), 2.34 – 2.29 (m, 1H), (2.29 – 2.25 (m, 1H)), 1.92 – 1.80 (m, 2H) (both rotamers), 1.75 – 1.62 (m, 1H) (both rotamers), (1.49 (s, 9H)), 1.43 (s, 9H), 1.20 – 1.10 (m, 2H) (both rotamers), 0.47 – 0.20 (m, 2H) (both rotamers);

**<sup>13</sup>C NMR** (126 MHz, CDCl<sub>3</sub>)  $\delta$  173.1, (173.0), 156.3, (155.7), 133.6, (133.2), 132.7, (132.4), 131.7, (131.5), 121.6, (121.6), 80.5, (80.3), 52.5, (52.4), 43.3, (42.3), 41.5, (40.1), 34.4, (34.1), 28.4, (28.3), 25.0, (24.6), 21.2, (21.0), 18.5, (18.5);

**IR (neat)** 2974, 2951, 2867, 2252, 1779, 1691, 1593, 1489, 1476, 1435, 1409, 1391, 1365, 1301, 1246, 1216, 1202, 1157, 1143, 1102, 1084, 1074, 1012, 970, 937, 907, 888, 842, 827, 809, 771, 729, 724 cm<sup>-1</sup>;

**HRMS (+p NSI)** calcd for C<sub>19</sub>H<sub>25</sub>BrNO<sub>4</sub> (M+H)<sup>+</sup> 410.0962 found 410.09648;

**HPLC** (ADH column, 1% *i*-propanol in hexane, 1 mL min<sup>-1</sup>, 1 mg mL<sup>-1</sup>, 60 min, UV 230 nm) retention times of 11.83 min (major) and 13.33 min (minor) 92% ee with Rh<sub>2</sub>(*S*-DOSP)<sub>4</sub>.

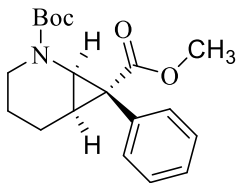

**2-(*tert*-Butyl) 7-methyl (1*R*,6*R*,7*S*)-7-phenyl-2-azabicyclo[4.1.0]heptane-2,7-dicarboxylate (8b)**

Following *General Procedure for Cyclopropanation Reactions* (methyl 2-diazo-2-phenylacetate (88 mg), Rh<sub>2</sub>(*S*-DOSP)<sub>4</sub> as catalyst, pentane as solvent, at 0 °C), the desired cyclopropanation product was obtained for characterization (95% ee).

White solid: **m.p.** 68-72 °C

**R<sub>f</sub>** = 0.19 (5% ethyl acetate in hexane);

**[α]<sup>20</sup><sub>D</sub>**: +149.6° (c = 1.00, CHCl<sub>3</sub>, 95% ee);

**<sup>1</sup>H NMR** (500 MHz, CDCl<sub>3</sub>) *Rotamer1* : (*Rotamer2*) (1.22:1) δ 7.27 (m, 10H) (both rotamers), (3.73 (d, *J* = 9.3 Hz, 1H)), 3.67 (d, *J* = 9.4 Hz, 1H), 3.55 (s, 3H), (3.53 (s, 3H)), 3.19 (dt, *J* = 12.4, 4.3 Hz, 1H), (3.08 (dt, *J* = 12.4, 4.4 Hz, 1H)), 2.77 – 2.58 (m, 2H) (both rotamers), (2.40 – 2.34 (m, 1H)), 2.34 – 2.28 (m, 1H), 1.89 (m, 2H) (both rotamers), 1.78 (t, *J* = 13.4 Hz, 2H) (both rotamers), 1.56 (s, 9H), (1.49 (s, 9H)), 1.16 (m, 2H) (both rotamers), 0.35 (m, 2H) (both rotamers).;

**<sup>13</sup>C NMR** (126 MHz, CDCl<sub>3</sub>) δ 173.7, (173.5), 156.3, (155.8), 133.5, (133.3), 131.8, (131.5), 128.4, (128.2), 127.3, (127.2), 80.3, (80.0), 52.4, (52.4), 43.2, (42.2), 41.5, (40.13), 34.80, (34.56), 28.38, (28.36), 24.90, (24.51), 21.15, (20.92), 18.62, (18.57);

**IR** (*neat*) 2973, 2951, 2867, 1693, 1604, 1498, 1476, 1446, 1435, 1408, 1390, 1366, 1302, 1245, 1216, 1203, 1158, 1142, 1102, 1085, 1076, 1031, 1014, 982, 968, 939, 901, 888, 854, 842, 809, 773, 759, 746, 706, 677 cm<sup>-1</sup>;

**HRMS** (+p NSI) calcd for C<sub>19</sub>H<sub>26</sub>NO<sub>2</sub> (M+H)<sup>+</sup> 332.1856 found 332.18697;

**HPLC** (ADH column, 0.3% *i*-propanol in hexane, 1 mL min<sup>-1</sup>, 1 mg mL<sup>-1</sup>, 45 min, UV 230 nm) retention times of 22.90 min (major) and 28.27 min (minor) 95% ee with Rh<sub>2</sub>(*S*-DOSP)<sub>4</sub>.

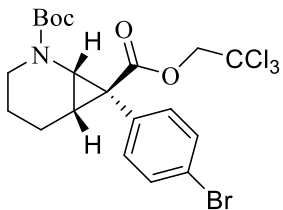

**2-(*tert*-Butyl) 7-(2,2,2-trichloroethyl) (1*R*,6*R*,7*S*)-7-phenyl-2-azabicyclo[4.1.0]heptane-2,7-dicarboxylate**

Following *General Procedure for Cyclopropanation Reactions* (2,2,2-trichloroethyl 2-(4-bromophenyl)-2-diazoacetate (186.8 mg), Rh<sub>2</sub>(*R*-DOSP)<sub>4</sub> as catalyst, pentane as solvent, at 23 °C), the desired cyclopropanation product was obtained for characterization (80% ee).

White solid: **m.p.** 43–45 °C

**R<sub>f</sub>** = 0.30 (5% ethyl acetate in hexane);

**[α]<sub>D</sub><sup>20</sup>**: -90.4° (c = 1.00, CHCl<sub>3</sub>, xx% ee);

**<sup>1</sup>H NMR** (600 MHz, CDCl<sub>3</sub>) *Rotamer1* : (*Rotamer2*) (1.13:1) δ 7.48 (d, *J* = 8.4 Hz, 1H), (7.45 (d, *J* = 8.5 Hz, 1H)), (7.20 (d, *J* = 8.5 Hz, 1H)), 7.18 (d, *J* = 8.4 Hz, 1H), (4.71 (d, *J* = 11.9 Hz, 1H)), 4.66 (d, *J* = 11.9 Hz, 1H), 4.60 (d, *J* = 11.9 Hz, 1H), (4.53 (d, *J* = 11.9 Hz, 1H)), (3.88 (d, *J* = 9.6 Hz, 1H)), 3.86 (d, *J* = 9.6 Hz, 1H), 3.26 (dt, *J* = 12.7, 4.6 Hz, 1H), (3.17 (dt, *J* = 12.2, 4.4 Hz, 1H)), 2.81 – 2.65 (m, 2H) (both rotamers), (2.48 (t, *J* = 8.2 Hz, 1H)), 2.43 (t, *J* = 8.2 Hz, 1H), 2.03 – 1.91 (m, 2H) (both rotamers), 1.83 (t, *J* = 4.6 Hz, 1H), (1.81 (t, *J* = 4.4 Hz, 1H)), 1.55 (s, 9H), (1.51 (s, 9H)), 1.30 – 1.20 (m, 2H) (both rotamers), 0.49 (m, 2H) (both rotamers);

**<sup>13</sup>C NMR** (126 MHz, CDCl<sub>3</sub>) δ 171.0, (170.9), 156.2, (155.6), 133.6, (133.2), 131.7, (131.7), 131.5, (131.5), 121.9, (121.8), 94.9, (94.8), 80.8, (80.4), 74.4, (74.3), 43.5, (42.8), 41.5, (40.3), 34.4, (34.1), 28.5, (28.4), 25.8, (25.6), 21.2, (21.0), 18.6, (18.5);

**IR** (*neat*) 2973, 2867, 1731, 1692, 1477, 1444, 1379, 1301, 1229, 1212, 1194, 1154, 1143, 1102, 910, 888, 832, 808, 769, 719, 608, 573, 530 cm<sup>-1</sup>;

**HRMS** (+p NSI) calcd for C<sub>20</sub>H<sub>24</sub>BrCl<sub>3</sub>NO<sub>4</sub> (M+H)<sup>+</sup> 525.9949 found 525.9953;

**HPLC** (ADH column, 1% *i*-propanol in hexane, 1 mL min<sup>-1</sup>, 1 mg mL<sup>-1</sup>, 45 min, UV 230 nm) retention times of 9.47 min (major) and 11.27 min (minor) 80% ee with Rh<sub>2</sub>(*R*-DOSP)<sub>4</sub>.

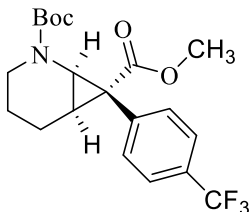

**2-(tert-Butyl) 7-(2,2,2-trichloroethyl) (1R,6R,7S)-7-(4-(trifluoromethyl)phenyl)-2-azabicyclo[4.1.0]heptane-2,7-dicarboxylate (8c)**

Following *General Procedure for Cyclopropanation Reactions* (methyl 2-diazo-2-(4-(trifluoromethyl)phenyl)acetate (122 mg),  $\text{Rh}_2(\text{S-DOSP})_4$  as catalyst, pentane as solvent, at 0 °C), the desired cyclopropanation product was obtained for characterization (90% ee).

Colorless oil

**Rf** = 0.10 (5% ethyl acetate in hexane);

**$[\alpha]_D^{20}$** : +129.7° (c = 1.00,  $\text{CHCl}_3$ , 90% ee);

**$^1\text{H NMR}$**  (600 MHz,  $\text{CDCl}_3$ ) *Rotamer1* : *Rotamer2* (1:1)  $\delta$  7.52 (d,  $J$  = 8.1 Hz, 2H), 7.49 (d,  $J$  = 8.2 Hz, 2H), 7.35 (d,  $J$  = 8.4 Hz, 2H), 7.33 (d,  $J$  = 8.2 Hz, 2H), 3.70 (d,  $J$  = 9.2 Hz, 1H), 3.65 (d,  $J$  = 9.3 Hz, 1H), 3.51 (s, 3H), 3.49 (s, 3H), 3.18 (dt,  $J$  = 12.5, 4.3 Hz, 1H), 3.09 (dt,  $J$  = 12.5, 4.4 Hz, 1H), 2.67 – 2.62 (m, 1H), 2.60 (td,  $J$  = 13.0, 3.1 Hz, 1H), 2.38 – 2.30 (m, 2H) (both rotamers), 1.94 – 1.84 (m, 2H) (both rotamers), 1.75 – 1.67 (m, 12.5 Hz, 2H) (both rotamers), 1.51 (s, 9H), 1.44 (s, 9H), 1.19 – 1.10 (m, 2H) (both rotamers), 0.34 – 0.14 (m, 2H) (both rotamers);

**$^{13}\text{C NMR}$**  (126 MHz,  $\text{CDCl}_3$ )  $\delta$  172.9, (172.7), 156.3, (155.7), 137.8, (137.7), 132.2, (131.9), 129.5 (q,  $J$  = 32.2 Hz), (129.4 (q,  $J$  = 32.2 Hz)), 125.3 (q,  $J$  = 3.6 Hz), (125.2 (q,  $J$  = 3.6 Hz)), 124.2 (q,  $J$  = 204.1 Hz), (124.2 (q,  $J$  = 204.1 Hz)), 80.6, (80.4), 52.5, (52.5) 43.3, (42.3), 41.4, (40.1), 34.7, 34.4, 28.4, (28.3), 25.0, (24.7), 21.2, (21.0), 18.5, (18.4);

**$^{19}\text{F NMR}$  (282 MHz,  $\text{CDCl}_3$ ) (*Rotamers*)  $\delta$  -62.41, (-62.57).**

**IR (neat)** 2974, 2954, 2870, 1692, 1618, 1477, 1445, 1436, 1409, 1391, 1366, 1323, 1246, 1216, 1159, 1143, 1122, 1108, 1085, 1075, 1066, 1020, 971, 938, 906, 889, 844, 809, 771, 760, 735, 691  $\text{cm}^{-1}$ ;

**HRMS (+p NSI)** calcd for  $\text{C}_{20}\text{H}_{24}\text{F}_3\text{NO}_4\text{Na}$  ( $\text{M}+\text{Na}$ )<sup>+</sup> 422.1550 found 422.15535;

**HPLC** (ADH column, 0.65% *i*-propanol in hexane, 0.65  $\text{mL min}^{-1}$ , 1  $\text{mg mL}^{-1}$ , 45 min, UV 230 nm) retention times of 15.73 min (major) and 17.49 min (minor) 90% ee with  $\text{Rh}_2(\text{S-DOSP})_4$ .

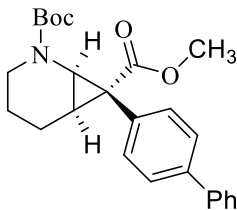

**2-(*tert*-Butyl) 7-(2,2,2-trichloroethyl) (1*R*,6*R*,7*S*)-7-([1,1'-biphenyl]-4-yl)-2-azabicyclo[4.1.0]heptane-2,7-dicarboxylate (8d)**

Following *General Procedure for Cyclopropanation Reactions* (methyl 2-([1,1'-biphenyl]-4-yl)-2-diazoacetate (126 mg), Rh<sub>2</sub>(*S*-DOSP)<sub>4</sub> as catalyst, pentane as solvent, at 0 °C), the desired cyclopropanation product was obtained for characterization (86% ee).

Colorless oil

**R<sub>f</sub>** = 0.10 (5% ethyl acetate in hexane);

**[α]<sup>20</sup><sub>D</sub>**: +149.5° (c = 1.00, CHCl<sub>3</sub>, 86% ee);

**<sup>1</sup>H NMR** (600 MHz, CDCl<sub>3</sub>) *Rotamer1* : (*Rotamer2*) (1.20:1) δ 7.52 (t, *J* = 7.8 Hz, 4H) (both rotamers), 7.48 (d, *J* = 8.2 Hz, 2H), (7.46 (d, *J* = 8.4 Hz, 2H)), (7.33 (t, *J* = 7.8, 2H)), 7.33 (t, *J* = 7.8, 2H), 7.25 (m, 6H) (both rotamers), (3.69 (d, *J* = 9.2 Hz, 1H)), 3.63 (d, *J* = 9.3 Hz, 1H), 3.51 (s, 3H), (3.49 (s, 3H)), 3.17 (dt, *J* = 12.4, 4.3 Hz, 1H), (3.04 (dt, *J* = 12.3, 4.4 Hz, 1H)), 2.70 – 2.56 (m, 2H) (both rotamers), (2.32 (t, *J* = 7.5 Hz, 1H)), 2.28 (t, *J* = 7.7 Hz, 1H), 1.92 – 1.79 (m, 2H) (both rotamers), 1.74 (t, *J* = 15.7 Hz, 2H) (both rotamers), 1.51 (s, 9H), (1.44 (s, 9H)), 1.16 – 1.05 (m, 2H) (both rotamers), 0.47 – 0.26 (m, 2H) (both rotamers);

**<sup>13</sup>C NMR** (126 MHz, CDCl<sub>3</sub>) δ 173.7, (173.5), 156.4, (155.9), 140.7, (140.6), 140.0, (139.8), 132.6, (132.4), 132.2, (131.8), 128.7, 127.3, (127.3), 127.1, (127.0), (126.9), 80.4, (80.1), 52.5, (52.5), 43.3, (42.3), 41.5, (40.2), 34.6, (34.3), 28.5, (28.4), 25.0, (24.7), 21.3, (21.1), 18.7, (18.6);

**IR (neat)** 3029, 2973, 2951, 2866, 2251, 1691, 1600, 1581, 1522, 1488, 1476, 1448, 1435, 1406, 1390, 1365, 1303, 1245, 1216, 1203, 1158, 1142, 1103, 1085, 1075, 1060, 1009, 969, 938, 907, 889, 843, 809, 764, 746, 728, 697 cm<sup>-1</sup>;

**HRMS (+p NSI)** calcd for C<sub>25</sub>H<sub>30</sub>NO<sub>4</sub> (M+H)<sup>+</sup> 408.2169 found 408.21752;

**HPLC** (S4900 column, 1% *i*-propanol in hexane, 1 mL min<sup>-1</sup>, 1 mg mL<sup>-1</sup>, 30 min, UV 230 nm) retention times of 11.41 min (major) and 13.64 min (minor) 86% ee with Rh<sub>2</sub>(*S*-DOSP)<sub>4</sub>.



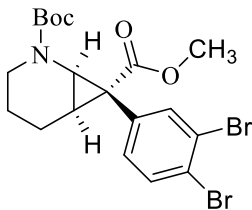

**2-(*tert*-Butyl) 7-(2,2,2-trichloroethyl) (1*R*,6*R*,7*S*)-7-(3,4-dibromophenyl)-2-azabicyclo[4.1.0]heptane-2,7-dicarboxylate (8e)**

Following *General Procedure for Cyclopropanation Reactions* (methyl 2-diazo-2-(3,4-dibromophenyl)acetate (167 mg), Rh<sub>2</sub>(*S*-DOSP)<sub>4</sub> as catalyst, pentane as solvent, at 0 °C), the desired cyclopropanation product was obtained for characterization (81% ee).

White solid: **m.p.** 133-134 °C

**R<sub>f</sub>** = 0.09 (5% ethyl acetate in hexane);

**[α]<sub>D</sub><sup>20</sup>**: +96.8° (c = 1.00, CHCl<sub>3</sub>, 81% ee);

**<sup>1</sup>H NMR** (500 MHz, CDCl<sub>3</sub>) *Rotamer1* : (*Rotamer2*) (1.27:1) δ 7.62 – 7.45 (m, 4H) (both rotamers), 7.13 – 6.99 (m, 2H) (both rotamers), 3.70 (d, *J* = 9.2 Hz, 1H), (3.64 (d, *J* = 9.3 Hz, 1H)), (3.57 (s, 3H)), 3.55 (s, 3H), (3.29 (dt, *J* = 12.3, 4.0 Hz, 1H)), 3.20 (dt, *J* = 12.2, 4.1 Hz, 1H), 2.75 – 2.58 (m, 2H) (both rotamers), 2.38 – 2.30 (m, 2H) (both rotamers), 1.98 – 1.86 (m, 2H) (both rotamers), 1.75 (d, *J* = 14.7 Hz, 2H) (both rotamers), (1.55 (s, 9H)), 1.50 (s, 9H), 1.31 – 1.16 (m, 2H) (both rotamers), 0.52 – 0.29 (m, 2H) (both rotamers);

**<sup>13</sup>C NMR** (126 MHz, CDCl<sub>3</sub>) δ 172.6, (172.5), 156.2, (155.5), 136.9, (136.5), 134.7, (134.5), 133.6, (133.4), 132.1, (131.7), 124.8, (124.6), 124.0, (123.9), 80.7, (80.5), 52.6, (52.6), 43.4, (42.4), 41.4, (40.1), 34.2, (33.9), 28.4, (28.4), 25.1, (24.7), 21.3, (21.1), 18.5, (18.4);

**IR (neat)** 2973, 2951, 2867, 2254, 1690, 1585, 1548, 1464, 1443, 1435, 1411, 1390, 1365, 1246, 1202, 1160, 1143, 1104, 1085, 1076, 1059, 1013, 975, 939, 908, 868, 842, 810, 788, 774, 760, 729, 703, 661 cm<sup>-1</sup>;

**HRMS (+p NSI)** calcd for C<sub>19</sub>H<sub>24</sub>Br<sub>2</sub>NO<sub>4</sub> (M+H)<sup>+</sup> 488.0067 found 488.00748;

**HPLC** (ADH column, 1% *i*-propanol in hexane, 1 mL min<sup>-1</sup>, 1 mg mL<sup>-1</sup>, 60 min, UV 230 nm) retention times of 11.82 min (major) and 16.48 min (minor) 81% ee with Rh<sub>2</sub>(*S*-DOSP)<sub>4</sub>.

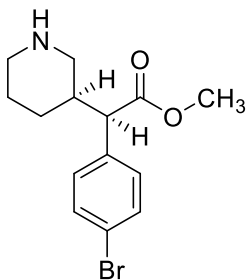

**Methyl (*R*)-2-(4-bromophenyl)-2-((*R*)-piperidin-3-yl)acetate (9a)**

Following *General Procedure for Ring-opening Reactions* (2-(*tert*-butyl) 7-methyl (1*R*,6*R*,7*S*)-7-(4-bromophenyl)-2-azabicyclo[4.1.0]heptane-2,7-dicarboxylate with 92% ee as starting material), the desired ring-opened product was obtained for characterization (93% ee).

White solid: **m.p.** 115-117 °C

**R<sub>f</sub>** = 0.03 (100% ethyl acetate);

**R<sub>f</sub>** = 0.19 (10% methanol in dichloromethane);

**[α]<sup>20</sup><sub>D</sub>**: -40.4° (c = 1.00, MeOH, 93% ee);

**<sup>1</sup>H NMR** (300 MHz, CD<sub>3</sub>OD) δ 7.43 (d, *J* = 8.5 Hz, 2H), 7.19 (d, *J* = 8.3 Hz, 2H), 3.57 (d, *J* = 0.7 Hz, 3H), 3.40 (d, *J* = 10.1 Hz, 1H), 3.18 (d, *J* = 14.6 Hz, 1H), 2.83 – 2.59 (m, 2H), 2.44 (t, *J* = 11.7 Hz, 1H), 2.34 (qt, *J* = 11.7, 3.1 Hz, 1H), 2.00 – 1.76 (m, 2H), 1.63 (qt, *J* = 13.5, 3.9 Hz, 1H), 1.27 (qd, *J* = 11.9, 3.9, 1H);

**<sup>13</sup>C NMR** (75 MHz, CD<sub>3</sub>OD) δ 174.8, 137.4, 134.1, 132.3, 124.0, 56.7, 53.7, 49.0, 46.4, 39.2, 29.7, 24.6;

**IR** (*neat*) 3367, 2927, 2852, 2419, 1732, 1610, 1553, 1488, 1434, 1407, 1337, 1244, 1293, 1219, 1197, 1161, 1101, 1073, 1011, 961, 914, 868, 824, 763, 720, 652, 618 cm<sup>-1</sup>;

**HRMS** (+p APCI) calcd for C<sub>14</sub>H<sub>19</sub>BrNO<sub>2</sub> (M+H)<sup>+</sup> 312.0594 found 312.06974;

**HPLC** (obtained on its 2,2,2-trifluoroacetamide derivative) (ASH column, 3% *i*-propanol in hexane, 1 mL min<sup>-1</sup>, 1 mg mL<sup>-1</sup>, 30 min, UV 230 nm) retention times of 13.22 min (minor) and 19.33 min (major) 93% ee.

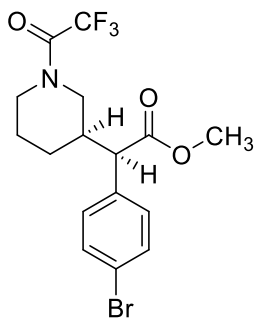

**Methyl (*R*)-2-(4-dibromophenyl)-2-((*R*)-1-(2,2,2-trifluoroacetyl)piperidin-3-yl)acetate**

Following *General Procedure for Derivatizing the Secondary Amine to 2,2,2-Trifluoroacetamide* (methyl (*R*)-2-(4-bromophenyl)-2-((*R*)-piperidin-3-yl)acetate as starting material), the desired derivatized product was obtained for characterization and enantiomeric ratio determination.

Colorless oil

**R<sub>f</sub>** = 0.32 (20% ethyl acetate in hexane);

**<sup>1</sup>H NMR** (600 MHz, CDCl<sub>3</sub>) δ *Rotamer1* : (*Rotamer2*) (1.10:1) δ 7.44 – 7.39 (m, 4H) (both rotamers), 7.15 – 7.12 (m, 4H) (both rotamers), (4.45 (dd, *J* = 13.2, 3.8 Hz, 1H)), 3.96 – 3.91 (m, 1H), 3.83 (s, 1H), (3.60 (s, 3H)), 3.59 (s, 3H), (3.52 – 3.48 (m, 1H)), 3.25 (d, *J* = 10.5 Hz, 1H), (3.19 (d, *J* = 10.5 Hz, 1H)), 3.04 (ddd, *J* = 14.3, 11.7, 3.0 Hz, 1H), 2.59 – 2.49 (m, 2H) (both rotamers), 2.40 – 2.33 (m, 1H), 2.21 (pt, *J* = 11.5, 3.6 Hz, 2H) (both rotamers), 1.94 (t, *J* = 15.7 Hz, 2H) (both rotamers), 1.80 – 1.73 (m, 2H) (both rotamers), 1.59 – 1.50 (m, 2H) (both rotamers), (1.37 – 1.29 (m, 1H)), 1.29 – 1.21 (m, 1H);

**<sup>13</sup>C NMR** (151 MHz, CDCl<sub>3</sub>) δ 172.5, (172.3), 155.5 (q, *J* = 35.7 Hz), (155.3 (d, *J* = 35.6 Hz)), 134.7, (134.3), 132.2, (132.1), 130.0, (129.9), 122.3, (122.2), 116.5 (q, *J* = 288.0 Hz), (116.3 (q, *J* = 288.1 Hz)), 55.1, (54.9), 52.3, (52.3), 49.3 (q, *J* = 3.6 Hz), 47.0, (46.4 (q, *J* = 3.5 Hz)), (44.2), 39.8, (38.7), 29.8, (29.3), 25.3, (24.6).;

**<sup>19</sup>F NMR** (565 MHz, CDCl<sub>3</sub>) δ -69.02, (-69.10).;

**IR (neat)** 2926, 2856, 1736, 1691, 1489, 1466, 1447, 1409, 1345, 1290, 1271, 1235, 1190, 1141, 1073, 1011, 835, 755 cm<sup>-1</sup>;

**HRMS (+p NSI)** calcd for C<sub>16</sub>H<sub>18</sub>BrF<sub>3</sub>NO<sub>3</sub> (M+H)<sup>+</sup> 408.0417 found 408.04204;

**HPLC** (ASH column, 3% *i*-propanol in hexane, 1 mL min<sup>-1</sup>, 1 mg mL<sup>-1</sup>, 30 min, UV 230 nm) retention times of 13.22 min (minor) and 19.33 min (major) 93% ee.

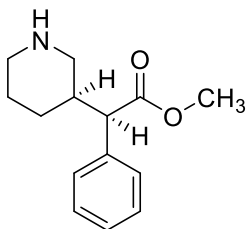

**Methyl (*R*)-2-phenyl-2-((*R*)-piperidin-3-yl)acetate (9b)**

Following *General Procedure for Ring-opening Reactions* (2-(*tert*-butyl) 7-methyl (1*R*,6*R*,7*S*)-7-phenyl-2-azabicyclo[4.1.0]heptane-2,7-dicarboxylate with 95% ee as starting material), the desired ring-opened product was obtained for characterization (91% ee).

White solid: **m.p.** 173-175 °C

**R<sub>f</sub>** = 0.02 (100% ethyl acetate);

**R<sub>f</sub>** = 0.37 (10% methanol in dichloromethane);

**[α]<sup>20</sup><sub>D</sub>**: -43.1° (c = 1.00, MeOH, 91% ee);

**<sup>1</sup>H NMR** (600 MHz, CDCl<sub>3</sub>) δ 7.29 – 7.16 (m, 5H), 3.58 (s, 3H), 3.23 (d, *J* = 10.8 Hz, 1H), 2.91 (d, *J* = 12.1 Hz, 1H), 2.56 (d, *J* = 12.0 Hz, 1H), 2.46 (td, *J* = 11.9, 2.9 Hz, 1H), 2.27 (bs, 1H), 2.15 (qt *J* = 10.5, 3.3 Hz, 3H), 2.06 (q, *J* = 10.4 Hz, 1H), 1.84 (d, *J* = 11.4 Hz, 1H), 1.63 (dq, *J* = 13.4, 3.1 Hz, 1H), 1.45 (qt, *J* = 13.0, 3.9 Hz, 1H), 1.13 (qd, *J* = 10.6, 3.9 Hz, 1H);

**<sup>13</sup>C NMR** (101 MHz, CDCl<sub>3</sub>) δ 173.7, 137.0, 128.6, 128.4, 127.4, 56.3, 51.8, 50.2, 46.6, 40.1, 30.2, 26.0;

**IR (neat)** 3320, 3062, 3028, 2929, 2850, 2735, 1731, 1558, 1439, 1454, 1424, 1338, 1272, 1242, 1217, 1197, 1135, 1018, 959, 892, 864, 779, 733, 700, 625, 614, 577 cm<sup>-1</sup>;

**HRMS (+p APCI)** calcd for C<sub>14</sub>H<sub>20</sub>NO<sub>2</sub> (M+H)<sup>+</sup> 234.1489 found 234.14904;

**HPLC** (obtained on its 2,2,2-trifluoroacetamide derivative) (ASH column, 3% *i*-propanol in hexane, 1 mL min<sup>-1</sup>, 1 mg mL<sup>-1</sup>, 30 min, UV 230 nm) retention times of 10.89 min (minor) and 15.22 min (major) 91% ee.

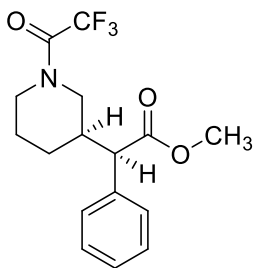

**Methyl (R)-2-phenyl-2-((R)-1-(2,2,2-trifluoroacetyl)piperidin-3-yl)acetate**

Following *General Procedure for Derivatizing the Secondary Amine to 2,2,2-Trifluoroacetamide* (methyl (R)-2-phenyl-2-((R)-piperidin-3-yl)acetate as starting material), the desired derivatized product was obtained for characterization and enantiomeric ratio determination.

Colorless oil

**R<sub>f</sub>** = 0.39 (20% ethyl acetate in hexane);

**<sup>1</sup>H NMR** (600 MHz, CDCl<sub>3</sub>) δ *Rotamer1* : (*Rotamer2*) (1.11:1) δ 7.31 – 7.20 (m, 10H) (both rotamers), 4.45 (ddq, *J* = 13.1, 4.1, 2.0 Hz, 1H), (3.97 (ddt, *J* = 12.8, 3.7, 1.8 Hz, 1H)), (3.83 (d, *J* = 13.4 Hz, 1H)), 3.60 (s, 3H), (3.59 (s, 3H)), 3.53 – 3.41 (m, 1H), (3.28 (d, *J* = 10.3 Hz, 1H)), 3.21 (d, *J* = 10.6 Hz, 1H), (3.01 (ddd, *J* = 14.2, 11.9, 3.0 Hz, 1H)), 2.58 – 2.48 (m, 2H) (both rotamers), (2.38 – 2.30 (m, 1H)), 2.30 – 2.19 (m, 2H) (both rotamers), 2.03 – 1.91 (m, 2H) (both rotamers), 1.81 – 1.72 (m, 2H) (both rotamers), 1.61 – 1.46 (m, 2H) (both rotamers), (1.36 – 1.27 (m, 1H)), 1.27 – 1.21 (m, 1H).;

**<sup>13</sup>C NMR** (151 MHz, CDCl<sub>3</sub>) δ 172.9, (172.7), 155.4 (q, *J* = 35.6 Hz), (155.3 (q, *J* = 35.6 Hz)), 135.7, (135.4), 129.0, (128.9), 128.2, (128.2), 128.2, (128.1), 116.5 (q, *J* = 288.0 Hz), (116.3 (q, *J* = 288.0 Hz)), 55.8, (55.6), 52.2, (52.1), 49.4 (q, *J* = 3.6 Hz), 47.2, (46.4 (q, *J* = 3.5 Hz)), (44.3), 40.0, (38.7), 29.9, (29.4), 25.5, (24.7).;

**<sup>19</sup>F NMR** (282 MHz, CDCl<sub>3</sub>) δ -69.01, (-69.20).;

**IR (neat)** 3031, 2951, 2860, 1733, 1685, 1497, 1466, 1456, 1436, 1345, 1291, 1274, 1236, 1183, 1134, 1044, 1005, 973, 956, 920, 882, 855, 827, 779, 754, 733, 699, 662, 622, 558, 531 cm<sup>-1</sup>;

**HRMS (+p NSI)** calcd for C<sub>16</sub>H<sub>19</sub>F<sub>3</sub>NO<sub>3</sub> (M+H)<sup>+</sup> 330.1312 found 330.13131;

**HPLC** (ASH column, 3% *i*-propanol in hexane, 1 mL min<sup>-1</sup>, 1 mg mL<sup>-1</sup>, 30 min, UV 230 nm) retention times of 10.89 min (minor) and 15.22 min (major) 91% ee.

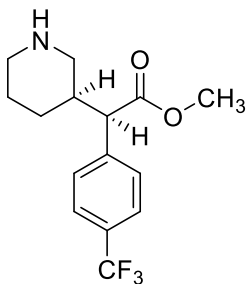

**Methyl (R)-2-((R)-piperidin-3-yl)-2-(4-(trifluoromethyl)phenyl)acetate (9c)**

Following *General Procedure for Ring-opening Reactions* (2-(*tert*-butyl) 7-(2,2,2-trichloroethyl) (1*R*,6*R*,7*S*)-7-(4-(trifluoromethyl)phenyl)-2-azabicyclo[4.1.0]heptane-2,7-dicarboxylate with 90% ee as starting material), the desired ring-opened product was obtained for characterization (90% ee).

White solid: **m.p.** 79-82 °C

**R<sub>f</sub>** = 0.18 (100% ethyl acetate);

**R<sub>f</sub>** = 0.34 (10% methanol in dichloromethane);

**[α]<sup>20</sup><sub>D</sub>**: -31.8° (c = 1.00, MeOH, 90% ee);

**<sup>1</sup>H NMR** (600 MHz, CD<sub>3</sub>OD) δ 7.56 (d, *J* = 8.3 Hz, 2H), 7.46 (d, *J* = 8.2 Hz, 2H), 3.57 (s, 3H), 3.45 (d, *J* = 10.1 Hz, 1H), 2.99 (d, *J* = 12.5 Hz, 1H), 2.59 – 2.48 (m, 2H), 2.26 (qt, *J* = 11.1, 3.3 Hz, 1H), 2.23 (t, *J* = 11.3 Hz, 1H), 1.86 (d, *J* = 12.9 Hz, 1H), 1.72 (dp, *J* = 14.0, 3.2 Hz, 1H), 1.53 (qt, *J* = 13.9, 4.0 Hz, 1H), 1.22 (qd, *J* = 10.7, 3.4 Hz, 1H);

**<sup>13</sup>C NMR** (126 MHz, CD<sub>3</sub>OD) δ 172.6, 140.9, 129.6 (q, *J* = 32.8 Hz), 128.8, 125.3 (q, *J* = 3.8 Hz), 124.1 (q, *J* = 271.1 Hz), 55.2, 51.3, 44.9, 38.3, 28.5, 23.8 (1 carbon not visible);

**IR (neat)** 2947, 2798, 2735, 1727, 1617, 1423, 1435, 1423, 1324, 1279, 1241, 1202, 1189, 1156, 1119, 1067, 1019, 961, 934, 901, 865, 852, 838, 816, 782, 756, 722, 647, 599, 582 cm<sup>-1</sup>;

**HRMS (+p APCI)** calcd for C<sub>15</sub>H<sub>19</sub>F<sub>3</sub>NO<sub>2</sub> (M+H)<sup>+</sup> 302.1362 found 302.13656;

**HPLC** (obtained on its 2,2,2-trifluoroacetamide derivative) (ASH column, 3% *i*-propanol in hexane, 1 mL min<sup>-1</sup>, 1 mg mL<sup>-1</sup>, 30 min, UV 230 nm) retention times of 9.09 min (minor) and 13.86 min (major) 90% ee.

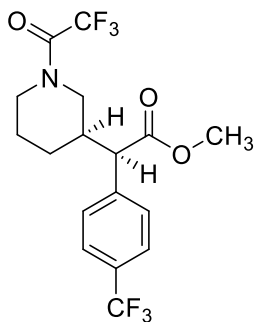

**Methyl (R)-2-((R)-1-(2,2,2-trifluoroacetyl)piperidin-3-yl)-2-(4-(trifluoromethyl)phenyl)acetate**

Following *General Procedure for Derivatizing the Secondary Amine to 2,2,2-Trifluoroacetamide* (methyl (R)-2-((R)-piperidin-3-yl)-2-(4-(trifluoromethyl)phenyl)acetate as starting material), the desired derivatized product was obtained for characterization and enantiomeric ratio determination.

Colorless oil

**R<sub>f</sub>** = 0.55 (20% ethyl acetate in hexane);

**<sup>1</sup>H NMR** (600 MHz, CDCl<sub>3</sub>) δ *Rotamer1* : (*Rotamer2*) (1.20:1) δ 7.56 (d, *J* = 8.1 Hz, 2H), (7.53 (d, *J* = 8.0 Hz 2H)), 7.39 (d, *J* = 8.1 Hz, 2H), (7.37 (d, *J* = 8.0 Hz, 2H)), (4.44 (ddd, *J* = 13.0, 4.1, 2.1 Hz, 1H)), 3.91 (ddt, *J* = 13.0, 3.7, 1.7 Hz, 1H), 3.81 (d, *J* = 14.0 Hz, 1H), (3.61 (s, 3H)), 3.60 (s, 3H), (3.45 (ddd, *J* = 13.7, 3.7, 1.8 Hz, 1H)), 3.37 (d, *J* = 10.5 Hz, 1H), (3.31 (d, *J* = 10.5 Hz, 1H)), 3.06 (ddd, *J* = 14.2, 11.6, 3.0 Hz, 1H), 2.59 - 2.52 (m, 2H) (both rotamers), 2.40 (dd, *J* = 13.0, 10.6 Hz, 1H), 2.33 - 2.20 (m, 2H) (both rotamers), 2.04 - 1.89 (m, 2H) (both rotamers), 1.81 - 1.74 (m, 2H) (both rotamers), 1.60 - 1.47 (m, 2H) (both rotamers), 1.40 - 1.32 (m, 1H), (1.31 - 1.23 (m, 1H));

**<sup>13</sup>C NMR** (151 MHz, CDCl<sub>3</sub>) δ 172.2, (172.0), 155.5 (q, *J* = 35.8 Hz), (155.2 (d, *J* = 35.5 Hz)), 139.8, (139.4), 130.5 (q, *J* = 32.6 Hz), (130.3 (q, *J* = 32.5 Hz)), 128.8, (128.7), 125.9 (q, *J* = 3.5 Hz), (125.8 (q, *J* = 3.4 Hz)), 124.0 (q, *J* = 272.1 Hz), (123.9 (q, *J* = 272.1 Hz)), 116.5 (q, *J* = 287.9 Hz), 116.2 (q, *J* = 288.1 Hz), 55.4, (55.2), 52.4, (52.3), 49.2 (q, *J* = 3.5 Hz), 46.9, (46.4 (q, *J* = 3.4 Hz)), (44.2), 40.0, (38.8), 29.7, (29.2), 25.3, (24.6).;

**<sup>19</sup>F NMR** (565 MHz, CDCl<sub>3</sub>) δ 62.69, (-62.77), -69.09, (-69.24);

**IR (neat)** 2954, 1735, 1686, 1619, 1466, 1438, 1422, 1324, 1280, 1186, 1159, 1116, 1067, 1019, 975, 954, 936, 905, 883, 844, 784, 755, 723, 694, 660, 602, 530 cm<sup>-1</sup>;

**HRMS (+p NSI)** calcd for C<sub>17</sub>H<sub>18</sub>F<sub>6</sub>NO<sub>3</sub> (M+H)<sup>+</sup> 398.1185 found 398.11859;

**HPLC** (ASH column, 3% *i*-propanol in hexane, 1 mL min<sup>-1</sup>, 1 mg mL<sup>-1</sup>, 30 min, UV 230 nm) retention times of 9.09 min (minor) and 13.86 min (major) 90% ee.

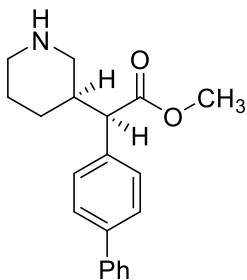

**Methyl (R)-2-([1,1'-biphenyl]-4-yl)-2-((R)-piperidin-3-yl)acetate (9d)**

Following *General Procedure for Ring-opening Reactions* (2-(*tert*-butyl) 7-(2,2,2-trichloroethyl) (1*R*,6*R*,7*S*)-7-([1,1'-biphenyl]-4-yl)-2-azabicyclo[4.1.0]heptane-2,7-dicarboxylate with 86% ee as starting material), the desired ring-opened product was obtained for characterization (87% ee).

White solid: **m.p.** 184-185 °C

**R<sub>f</sub>** = 0.09 (100% ethyl acetate);

**R<sub>f</sub>** = 0.44 (10% methanol in dichloromethane);

**[α]<sup>20</sup><sub>D</sub>**: -54.6° (c = 1.00, MeOH, 87% ee);

**<sup>1</sup>H NMR** (600 MHz, CD<sub>3</sub>OD) δ 7.57 – 7.45 (m, 4H), 7.32 (dt, *J* = 7.8, 3.5 Hz, 4H), 7.23 (t, *J* = 7.4 Hz, 1H), 3.56 (s, 3H), 3.43 (d, *J* = 10.1 Hz, 1H), 3.17 (d, *J* = 12.3 Hz, 1H), 2.72 (qd, *J* = 13.0, 3.2 Hz, 2H), 2.46 (t, *J* = 11.9 Hz, 1H), 2.41 (qt, 11.8, 2.8 Hz, 1H), 1.90 (d, *J* = 12.9 Hz, 1H), 1.83 (dp, *J* = 14.5, 3.0 Hz, 1H), 1.65 (qt, *J* = 14.3, 4.0 Hz, 1H), 1.28 (qd, *J* = 12.9, 3.7 Hz, 1H);

**<sup>13</sup>C NMR** (126 MHz, CD<sub>3</sub>OD) δ 175.2, 143.2, 142.6, 137.1, 130.9, 130.9, 129.5, 128.9, 57.1, 53.6, 49.2, 46.5, 39.3, 29.9, 24.8;

**IR (neat)** 3325, 3029, 2927, 2851, 2733, 1730, 1675, 1653, 1600, 1582, 1558, 1521, 1486, 1448, 1434, 1412, 1387, 1337, 1262, 1240, 1216, 1191, 1157, 1132, 1075, 1008, 959, 898, 863, 840, 759, 739, 697, 642, 620, 582, 558 cm<sup>-1</sup>;

**HRMS (+p APCI)** calcd for C<sub>20</sub>H<sub>23</sub>NO<sub>2</sub> (M+H)<sup>+</sup> 310.1802 found 310.18048;

**HPLC** (obtained on its 2,2,2-trifluoroacetamide derivative) (ASH column, 3% *i*-propanol in hexane, 1 mL min<sup>-1</sup>, 1 mg mL<sup>-1</sup>, 30 min, UV 230 nm) retention times of 14.78 min (minor) and 17.97 min (major) 87% ee.



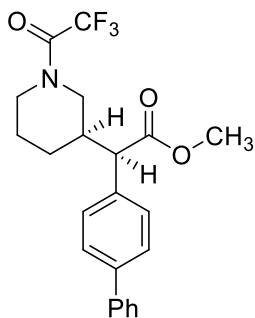

**Methyl (*R*)-2-([1,1'-biphenyl]-4-yl)-2-((*R*)-1-(2,2,2-trifluoroacetyl)piperidin-3-yl)acetate**

Following *General Procedure for Derivatizing the Secondary Amine to 2,2,2-Trifluoroacetamide* (methyl (*R*)-2-([1,1'-biphenyl]-4-yl)-2-((*R*)-piperidin-3-yl)acetate as starting material), the desired derivatized product was obtained for characterization and enantiomeric ratio determination.

Colorless oil

**R<sub>f</sub>** = 0.33 (20% ethyl acetate in hexane);

**<sup>1</sup>H NMR** (600 MHz, CDCl<sub>3</sub>) δ *Rotamer1* : *Rotamer2* (1:1) δ 7.53-7.48 (m, 8H) (both rotamers), 7.40 – 7.33 (m, 4H) (both rotamers), 7.33 – 7.24 (m, 6H) (both rotamers), 4.45 (ddt, *J* = 15.0, 4.0, 1.9 Hz, 1H), 4.05 (ddt, *J* = 12.9, 3.7, 1.8 Hz, 1H), 3.84 (d, *J* = 13.9 Hz, 1H), 3.62 (s, 3H), 3.61 (s, 3H), 3.58 – 3.54 (m, 1H), 3.33 (d, *J* = 10.3 Hz, 1H), 3.27 (d, *J* = 10.5 Hz, 1H), 3.03 (ddd, *J* = 14.2, 11.9, 2.9 Hz, 1H), 2.59 – 2.51 (m, 1H), 2.55 (dd, *J* = 13.9, 11.6 Hz, 1H), 2.38 (dd, *J* = 12.9, 10.9 Hz, 1H), 2.35 – 2.20 (m, 2H), 2.04 – 1.90 (m, 2H), 1.81 – 1.74 (m, 1H) (both rotamers), 1.60 – 1.49 (m, 2H), 1.38 – 1.23 (m, 2H);

**<sup>13</sup>C NMR** (151 MHz, CDCl<sub>3</sub>) δ 172.9, (172.7), 155.4 (q, *J* = 35.5 Hz), (155.3 (q, *J* = 35.6 Hz)), 141.1, (141.0), 140.5, (140.4), 134.7, (134.3), 128.8, (128.8), 128.7, (128.6), 127.7, (127.6), 127.5, (127.4), 127.1, (127.1), 116.5 (q, *J* = 288.0 Hz), (116.3 (q, *J* = 288.1 Hz)), 55.4, (55.3), 52.3, (52.2), 49.4 (q, *J* = 3.4 Hz), 47.2, (46.5 (q, *J* = 3.5 Hz)), (44.3), 39.9, (38.7), 29.9, (29.4), 25.4, (24.7);

**<sup>19</sup>F NMR** (282 MHz, CDCl<sub>3</sub>) δ -68.98, (-69.11).;

**IR** (*neat*) 3031, 2950, 2857, 1735, 1691, 1487, 1466, 1448, 1413, 1345, 1279, 1267, 1235, 1188, 1158, 1142, 1009, 974, 845, 760, 740, 699 cm<sup>-1</sup>;

**HRMS** (+p NSI) calcd for C<sub>22</sub>H<sub>23</sub>F<sub>3</sub>NO<sub>3</sub> (M+H)<sup>+</sup> 406.1625 found 406.16250;

**HPLC** (ASH column, 3% *i*-propanol in hexane, 1 mL min<sup>-1</sup>, 1 mg mL<sup>-1</sup>, 30 min, UV 230 nm) retention times of 14.78 min (minor) and 17.97 min (major) 87% ee.

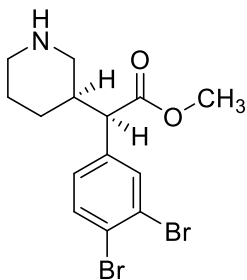

**Methyl (R)-2-(3,4-dibromophenyl)-2-((R)-piperidin-3-yl)acetate (9e)**

Following *General Procedure for Ring-opening Reactions* (2-(*tert*-butyl) 7-(2,2,2-trichloroethyl) (1*R*,6*R*,7*S*)-7-(3,4-dibromophenyl)-2-azabicyclo[4.1.0]heptane-2,7-dicarboxylate with 81% ee as starting material), the desired ring-opened product was obtained for characterization (80% ee).

Colorless oil

**R<sub>f</sub>** = 0.15 (100% ethyl acetate);

**R<sub>f</sub>** = 0.50 (10% methanol in dichloromethane);

**[α]<sup>20</sup><sub>D</sub>**: -27.5° (c = 1.00, MeOH, 80% ee);

**<sup>1</sup>H NMR** (600 MHz, CD<sub>3</sub>OD) δ 7.60 (d, *J* = 2.1 Hz, 1H), 7.54 (d, *J* = 8.3 Hz, 1H), 7.15 (dd, *J* = 8.3, 2.1 Hz, 1H), 3.56 (s, 3H), 3.29 (d, *J* = 10.2 Hz, 1H), 2.88 (d, *J* = 12.3 Hz, 1H), 2.41 – 2.50 (m, 2H), 2.16 – 2.05 (m, 2H), 1.84 – 1.72 (m, 1H), 1.64 (dp, *J* = 13.4, 3.3 Hz, 1H), 1.45 (qt, *J* = 12.3, 4.0 Hz, 1H), 1.20 – 1.08 (m, 1H);

**<sup>13</sup>C NMR** (75 MHz, CD<sub>3</sub>OD) δ 172.7, 138.2, 133.7, 133.3, 128.7, 124.4, 123.3, 54.6, 51.3, 48.5, 45.2, 39.0, 29.0, 24.6.;

**IR** (*neat*) 3325, 2928, 2851, 2806, 2733, 1730, 1653, 1582, 1553, 1459, 1434, 1395, 1337, 1298, 1260, 1238, 1193, 1158, 1131, 1111, 1076, 1013, 959, 940, 905, 865, 826, 777, 729, 698, 670, 595, 559 cm<sup>-1</sup>;

**HRMS** (+p APCI) calcd for C<sub>14</sub>H<sub>18</sub>Br<sub>2</sub>NO<sub>2</sub> (M+H)<sup>+</sup> 389.9699 found 389.97030;

**HPLC** (obtained on its 2,2,2-trifluoroacetamide derivative) (ASH column, 3% *i*-propanol in hexane, 1 mL min<sup>-1</sup>, 1 mg mL<sup>-1</sup>, 30 min, UV 230 nm) retention times of 15.21 min (minor) and 24.16 min (major) 80% ee.

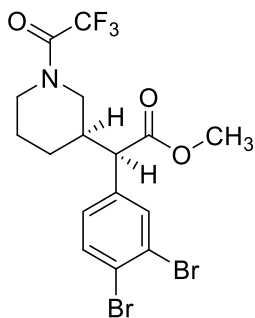

**Methyl (*R*)-2-(3,4-dibromophenyl)-2-((*R*)-1-(2,2,2-trifluoroacetyl)piperidin-3-yl)acetate**

Following *General Procedure for Derivatizing the Secondary Amine to 2,2,2-Trifluoroacetamide* (methyl (*R*)-2-(3,4-dibromophenyl)-2-((*R*)-piperidin-3-yl)acetate as starting material), the desired derivatized product was obtained for characterization and enantiomeric ratio determination.

Colorless oil

**R<sub>f</sub>** = 0.39 (20% ethyl acetate in hexane);

**<sup>1</sup>H NMR** (600 MHz, CDCl<sub>3</sub>) δ *Rotamer1* : (*Rotamer2*) (1.18:1) δ 7.57 – 7.48 (m, 4H) (both rotamer), 7.09 (dd, *J* = 8.3, 2.2 Hz, 1H), (7.06 (dd, *J* = 8.3, 2.2 Hz, 1H)), (4.45 (ddd, *J* = 13.1, 4.2, 2.1 Hz, 1H)), 3.94 (ddt, *J* = 13.1, 3.7, 1.7 Hz, 1H), 3.82 (d, *J* = 14.1 Hz, 1H), (3.61 (s, 3H)), 3.61 (s, 3H), (3.52 (ddd, *J* = 13.7, 3.8, 1.9 Hz, 1H)), 3.23 (d, *J* = 10.5 Hz, 1H), (3.17 (d, *J* = 10.5 Hz, 1H)), 3.05 (ddd, *J* = 14.2, 11.6, 3.0 Hz, 1H), 2.65 – 2.48 (m, 2H) (both rotamers), 2.47 – 2.33 (m, 1H), 2.27 – 2.13 (m, 2H) (both rotamers), 1.98 – 1.87 (m, 2H) (both rotamers), 1.80 – 1.74 (m, 2H) (both rotamers), 1.61 – 1.46 (m, 2H) (both rotamers), 1.38 – 1.29 (m, 1H), (1.25 (m, 1H));

**<sup>13</sup>C NMR** (151 MHz, CDCl<sub>3</sub>) δ 172.0, (171.8), 155.5 (q, *J* = 35.7 Hz), (155.2 (q, *J* = 35.7 Hz)), 136.7, (136.3), 134.2, (134.0), 133.6, (133.5), 128.3, (128.2), 125.4, (125.3), 124.6, (124.6), 116.5 (d, *J* = 288.0 Hz), (116.3 (d, *J* = 288.2 Hz)), 54.7, (54.4), 52.5, (52.4), 49.2 (q, *J* = 3.4 Hz), 46.9, (46.4 (q, *J* = 3.4 Hz)), (44.2), 39.8, (38.7), 29.7, (29.2), 25.2, (24.6);

**<sup>19</sup>F NMR (282 MHz, CDCl<sub>3</sub>)** δ -69.01, (-69.06);

**IR (neat)** 2950, 2858, 1734, 1685, 1463, 1397, 1343, 1267, 1291, 1235, 1187, 1138, 1113, 1044, 1014, 975, 956, 909, 854, 832, 778, 754, 733, 699, 661 cm<sup>-1</sup>;

**HRMS (+p NSI)** calcd for C<sub>16</sub>H<sub>17</sub>Br<sub>2</sub>F<sub>3</sub>NO<sub>3</sub> (M+H)<sup>+</sup> 485.9522 found 485.95260;

**HPLC** (ASH column, 3% *i*-propanol in hexane, 1 mL min<sup>-1</sup>, 1 mg mL<sup>-1</sup>, 30 min, UV 230 nm) retention times of 15.21 min (minor) and 24.16 min (major) 80% ee.

## 6. Reference

1. Guptill, D. M.; Davies, H. M. L. *J. Am. Chem. Soc.* **2014**, *136*, 17718.
2. Briones, J. F.; Hansen, J.; Hardcastle, K. I.; Autschbach, J.; Davies, H. M. L. *J. Am. Chem. Soc.* **2010**, *132*, 17211.
3. Chepiga, K. M.; Qin, C.; Alford, J. S.; Chennamadhavuni, S.; Gregg, T. M.; Olson, J. P.; Davies, H. M. L.; *Tetrahedron* **2013**, *69*, 5765.
4. Pilsl, L. K. A.; Ertl, T.; Reiser, O. *Org. Lett.* **2017**, *19*, 2754.
5. Davies, H. M. L.; Morton, D. *Chem. Soc. Rev.* **2011**, *40*, 1857.
6. Fu, L.; Hoang, K.; Tortoreto, C.; Liu, W.; Davies, H. M. L. *Org. Lett.* **2018**, *20*, 2399.
7. Davies, H. M. L.; Hansen, T.; Churchill, M. R. *J. Am. Chem. Soc.* **2000**, *122*, 3063.
8. Qu, Z.; Shi, W.; Wang, J. *J. Org. Chem.* **2001**, *66*, 8139.
9. Takasu, N.; Oisaki, K.; Kanai, M. *Org. Lett.* **2013**, *15*, 1918.
10. Du, F.-T.; Ji, J.-X. *Chem. Sci.* **2012**, *3*, 460.
11. Brodsky, B. H.; Du Bois, J. *Org. Lett.* **2004**, *15*, 2619.
12. Pour, M.; Špulák, M.; Balšánek, V.; Kuneš, J.; Kubanová, P.; Buchta, V. *Bioorg. Med. Chem.* **2003**, *11*, 2843.
13. Sundberg, R. J.; Bloom, J. D. *J. Org. Chem.* **1981**, *46*, 4836.
14. Zhang, W.; Luo, M. *Chem. Commun.* **2016**, *52*, 2980.
15. Zhou, G.; Ting, P.; Aslanian, R.; Piwinski, J. *J. Org. Lett.* **2008**, *10*, 2517.
16. Kweon, D.-H.; Kim, H.-K.; Kim, J.-J.; Chung, H. A.; Lee, W. S.; Kim, S.-K.; Yoon, Y.-J. *J. Heterocycl. Chem.* **2002**, *39*, 203.

## 7. Crude NMR for Diastereo- (and/or Regio-) Selectivity Determination:

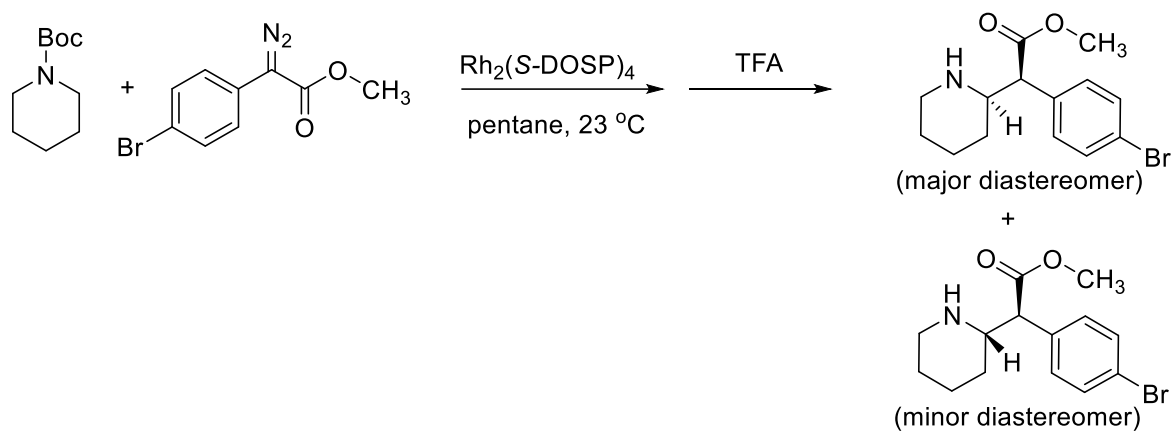

(Table S1, entry 1)

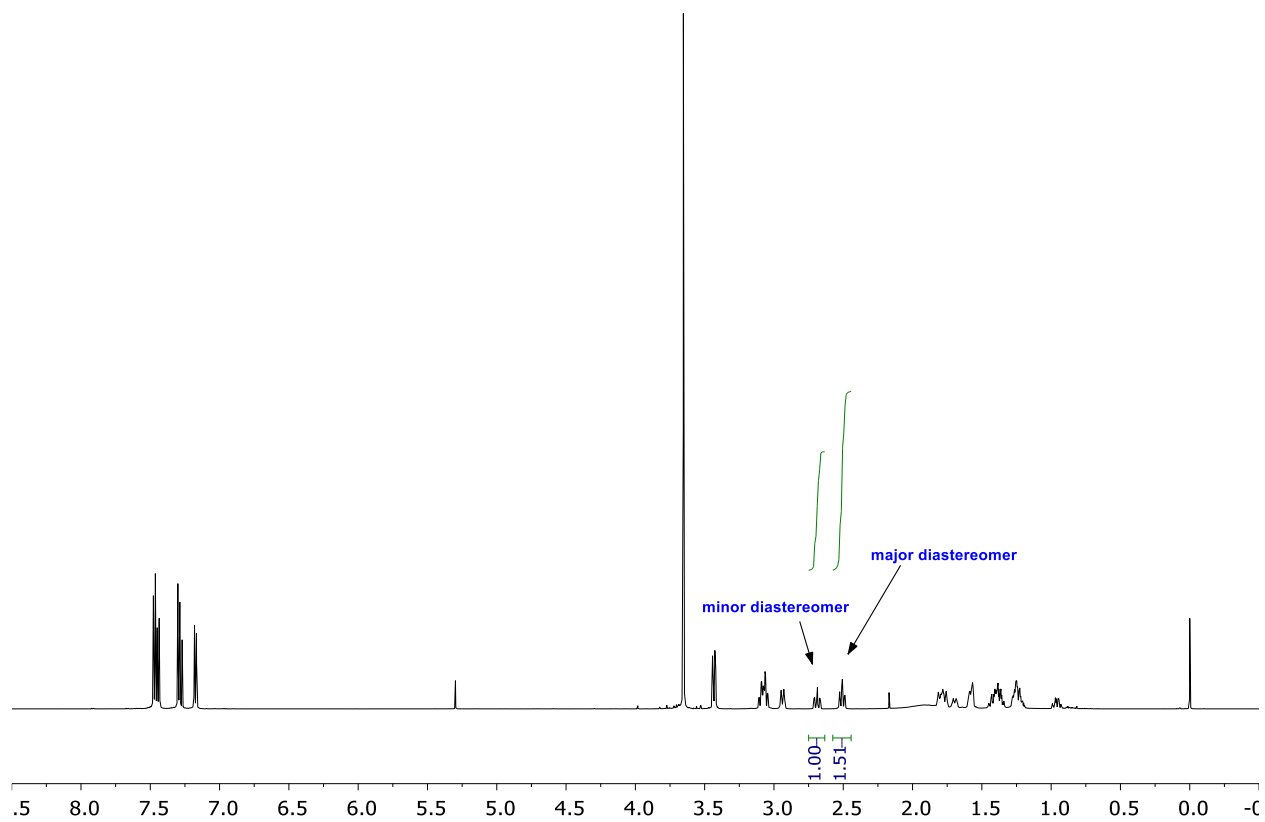

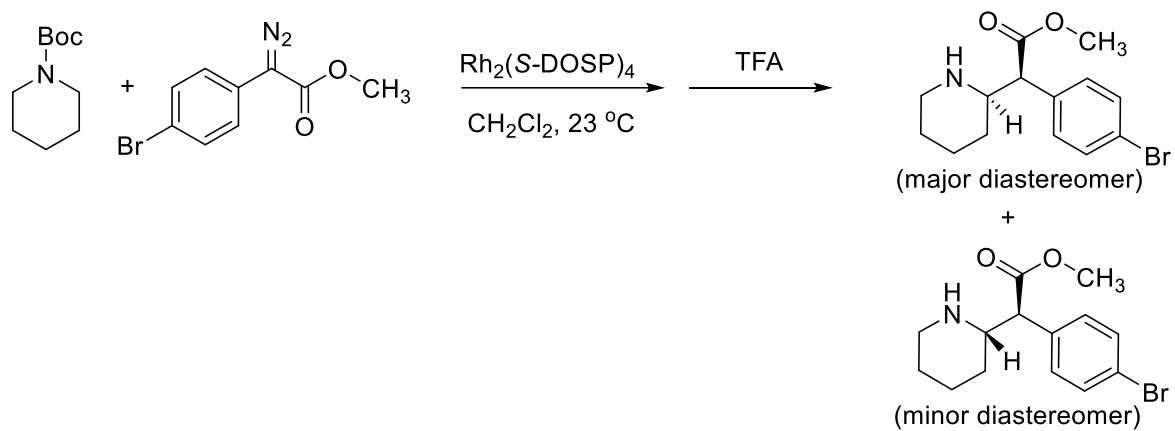

(Table 1, entry 1) (Table S1, entry 2)

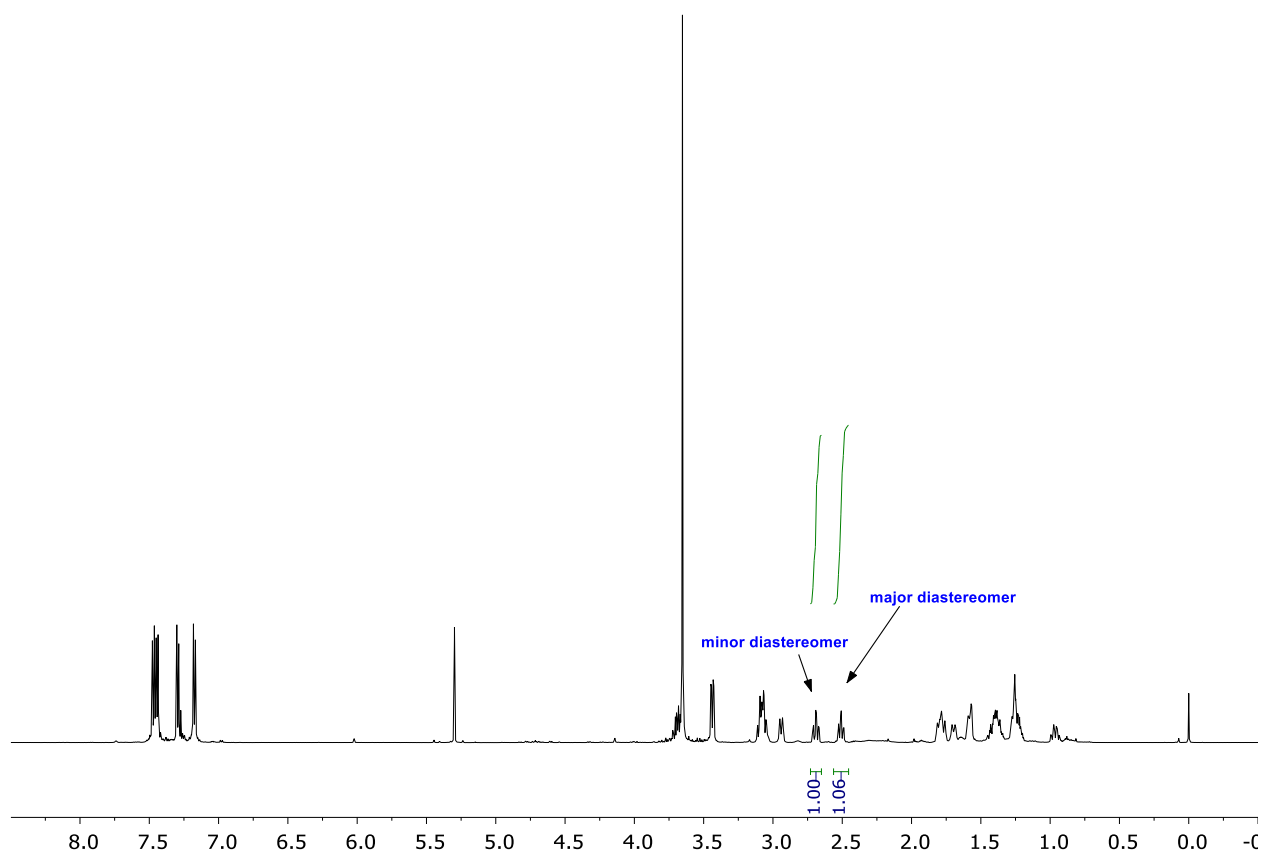

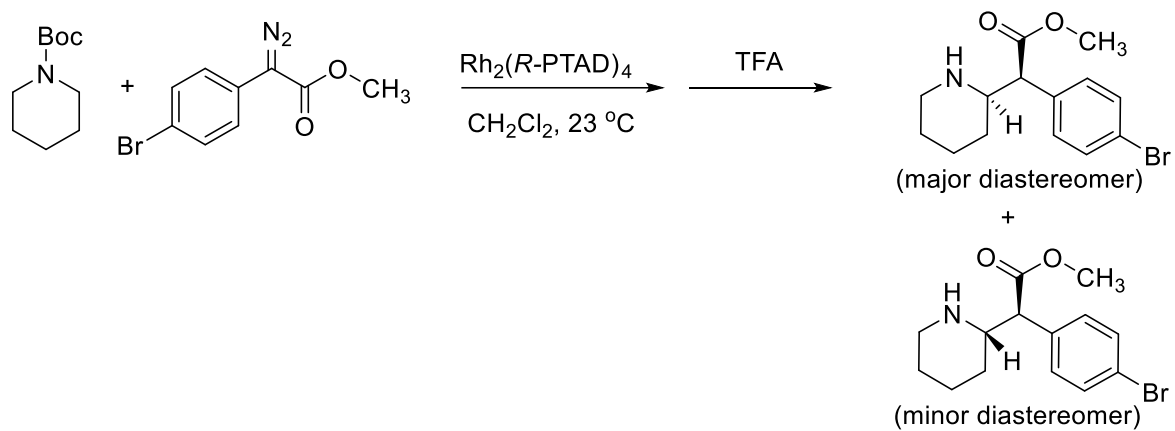

(Table S1, entry 3)

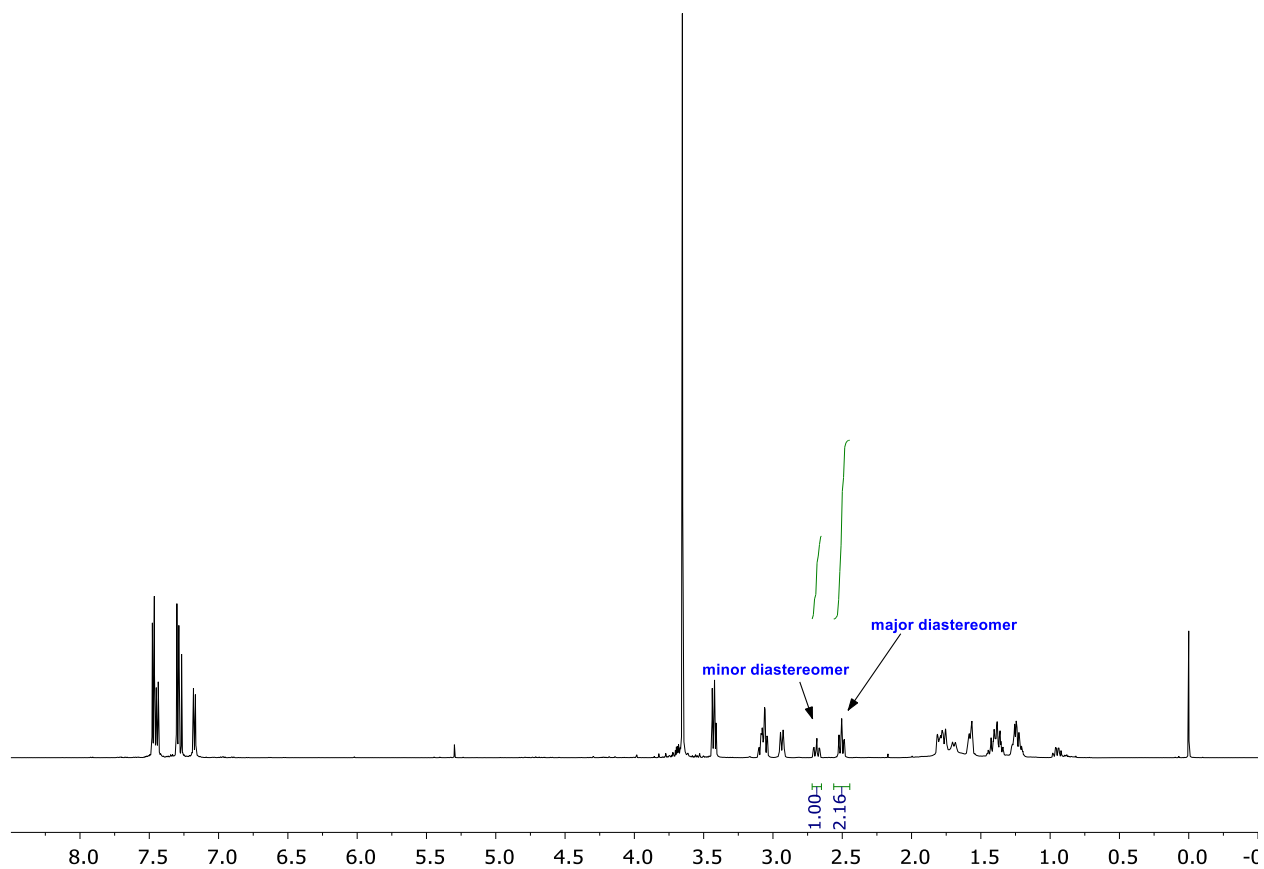

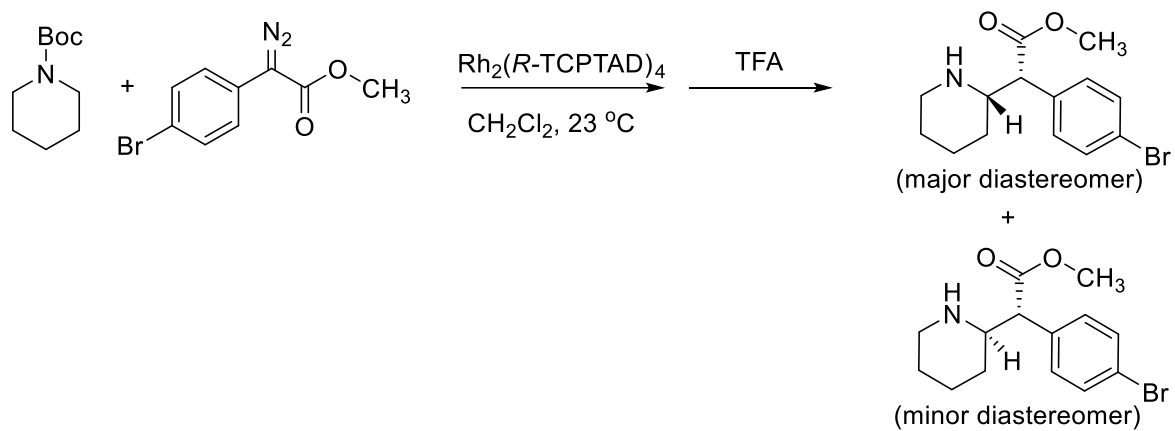

(Table 1, entry 2) (Table S1, entry 4)

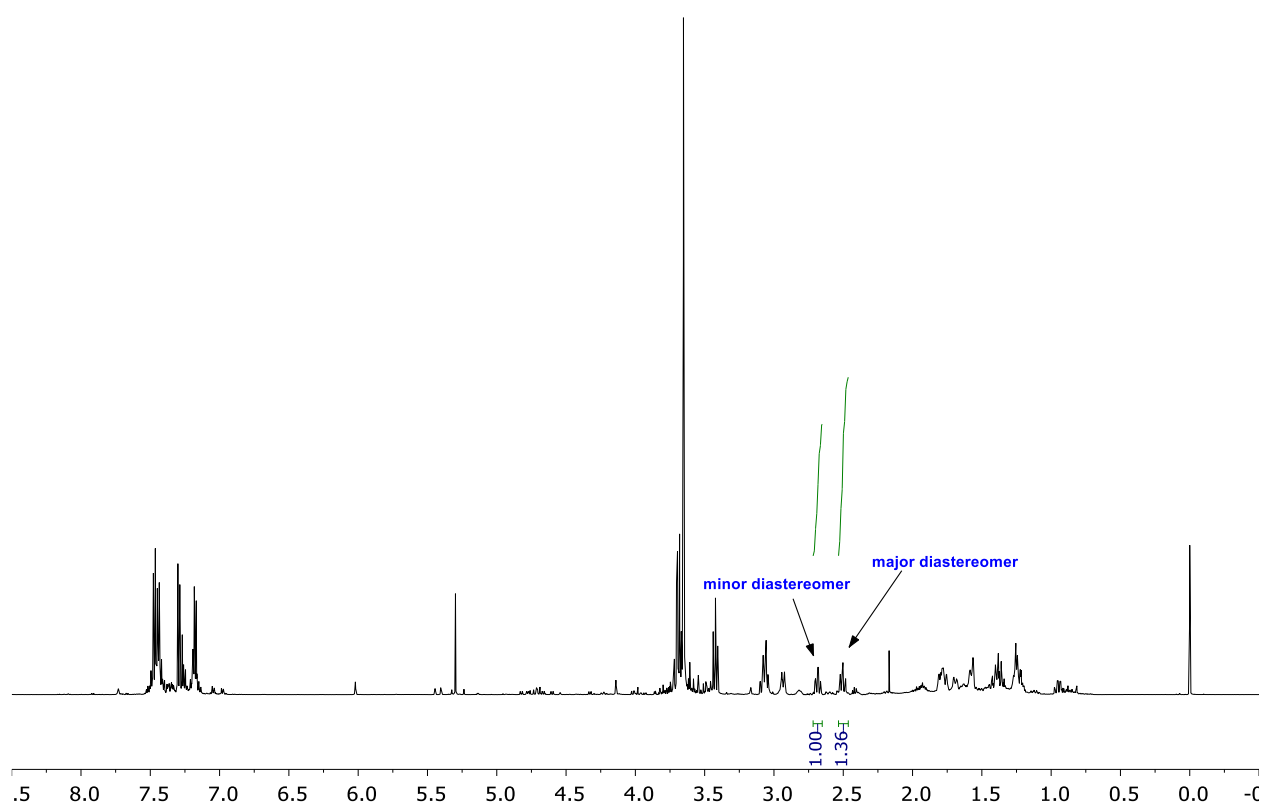



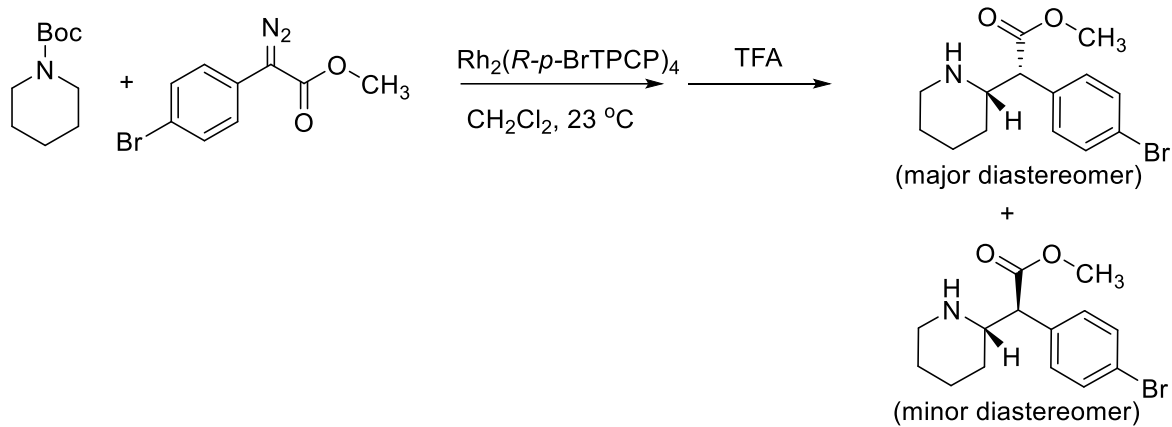

(Table 1, entry 3) (Table S1, entry 5)

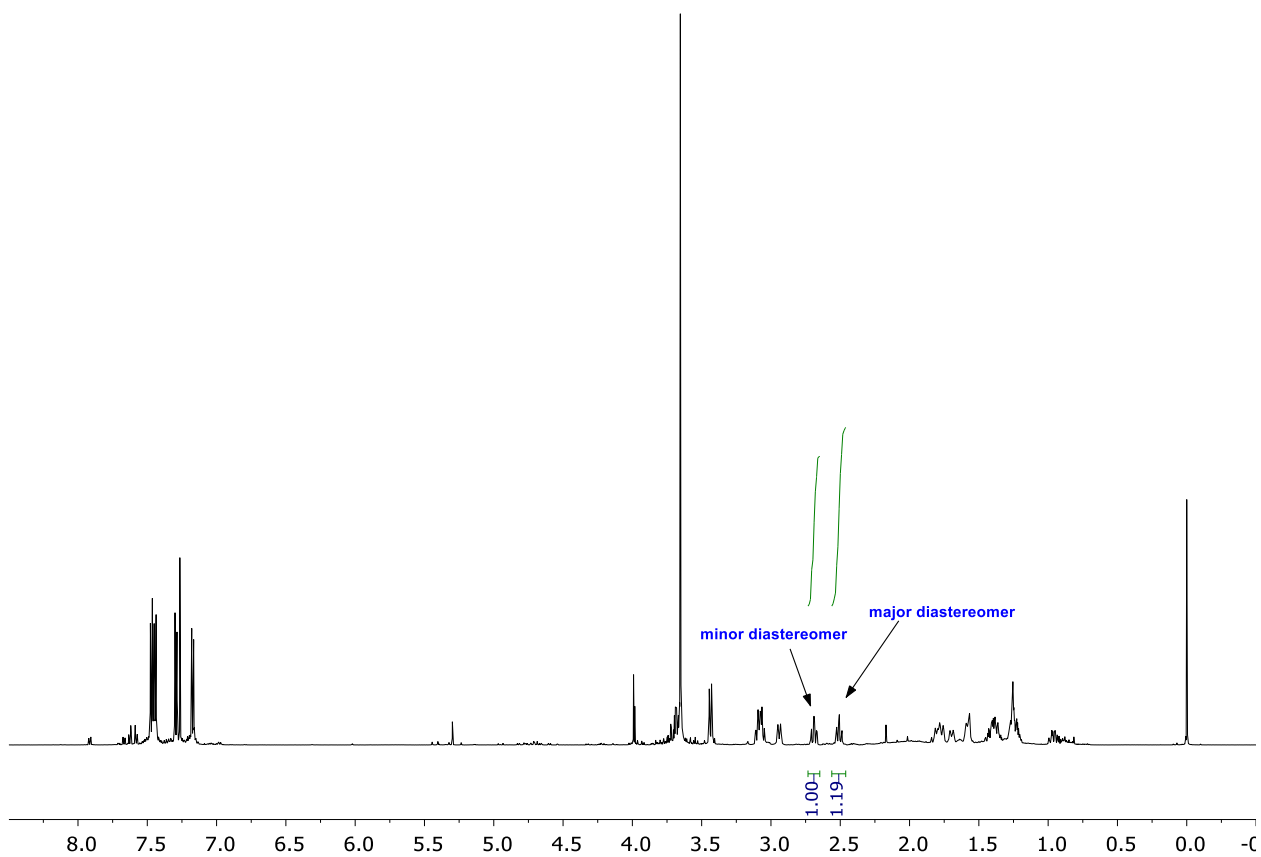

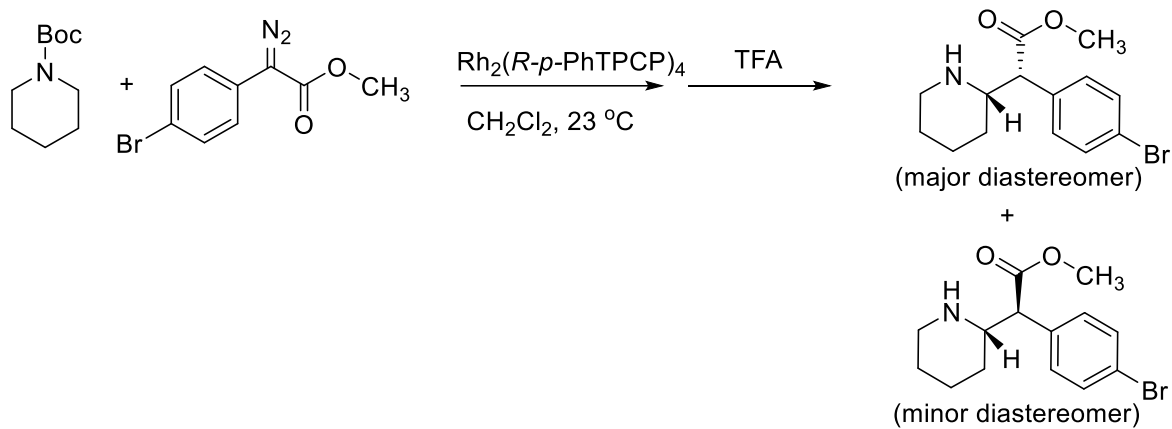

(Table S1, entry 6)

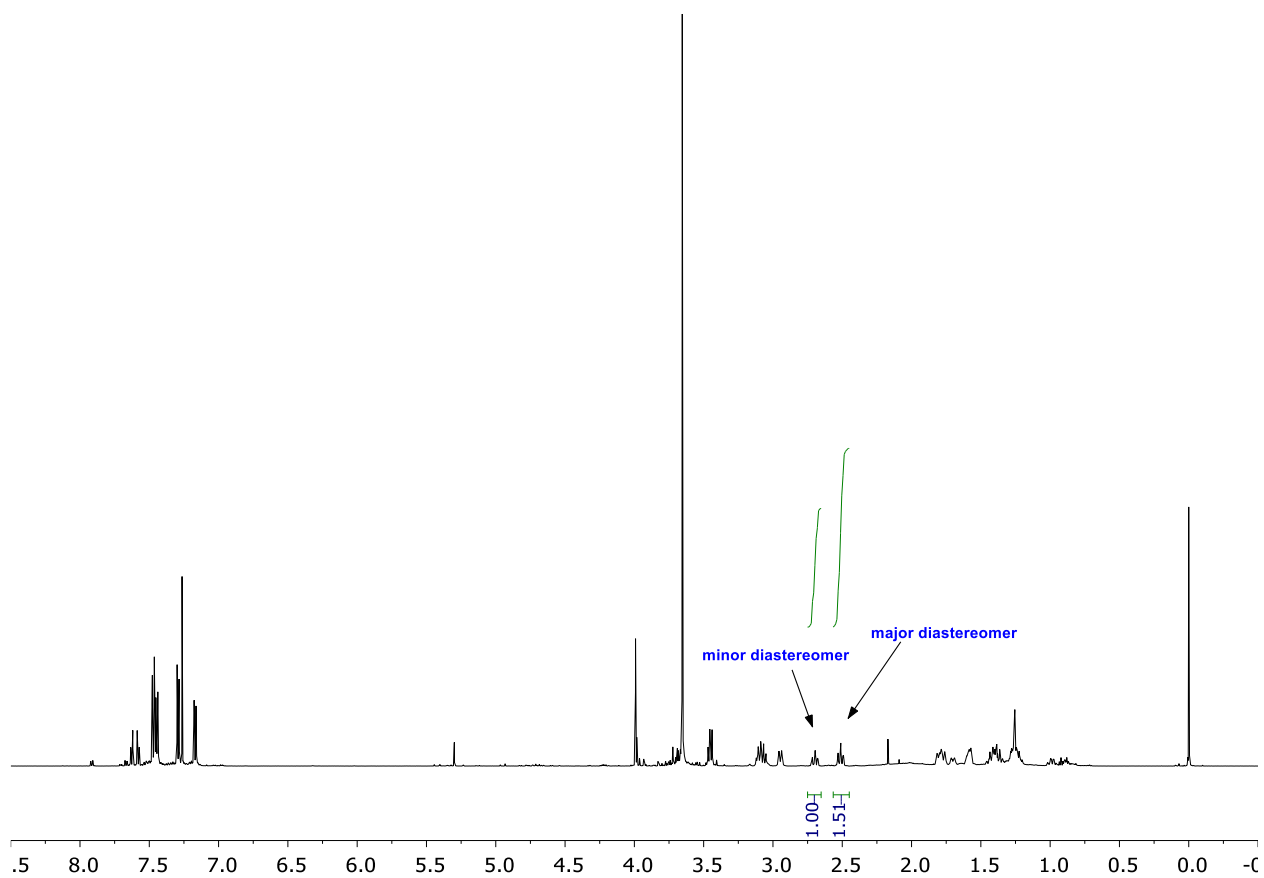

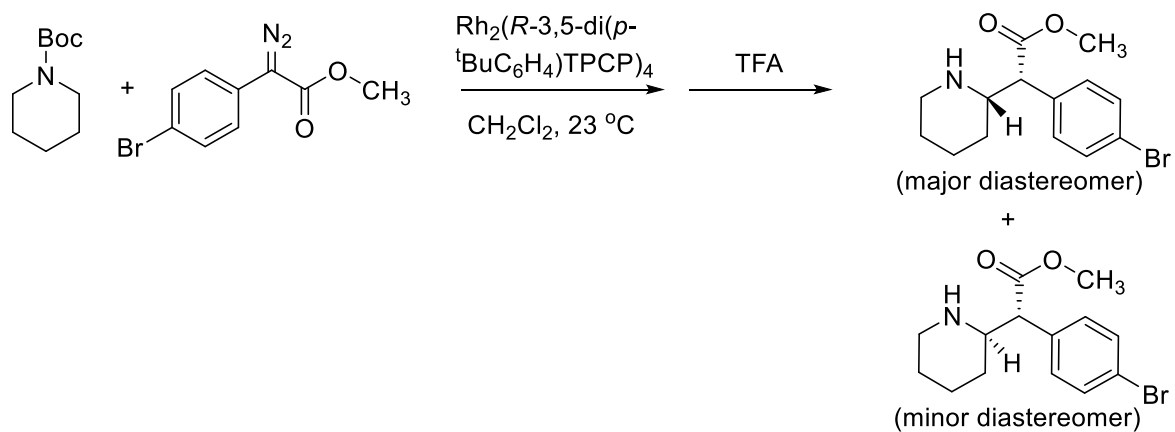

(Table S1, entry 7)

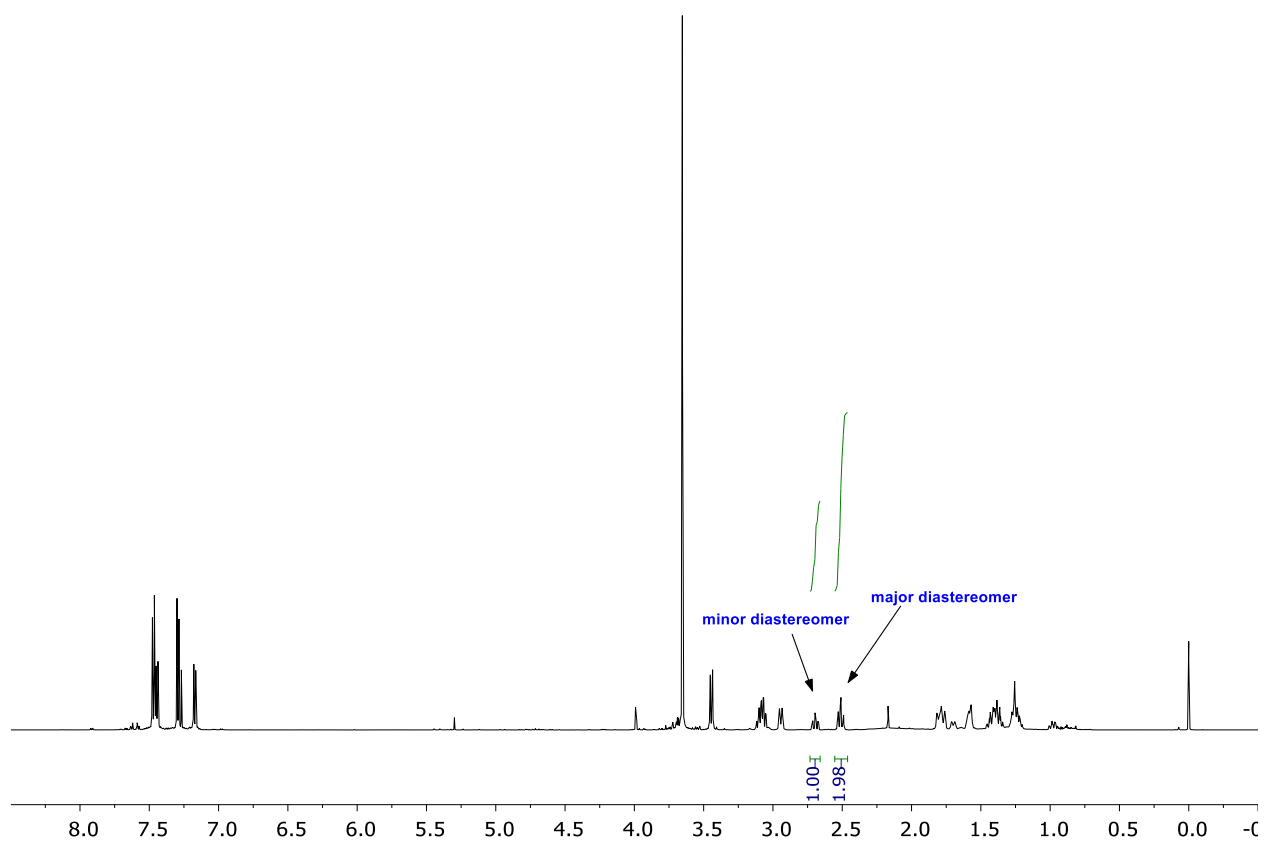

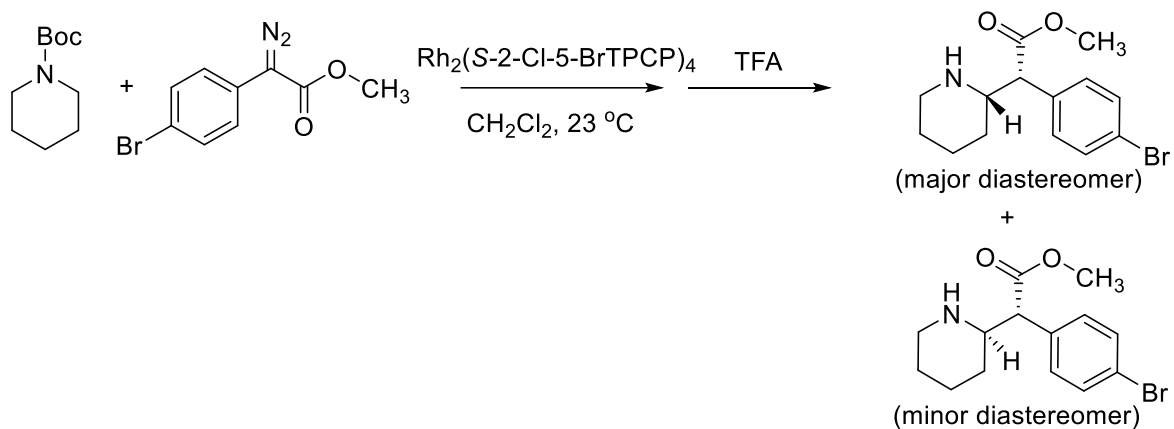

(Table 1, entry 5) (Table S1, entry 8)

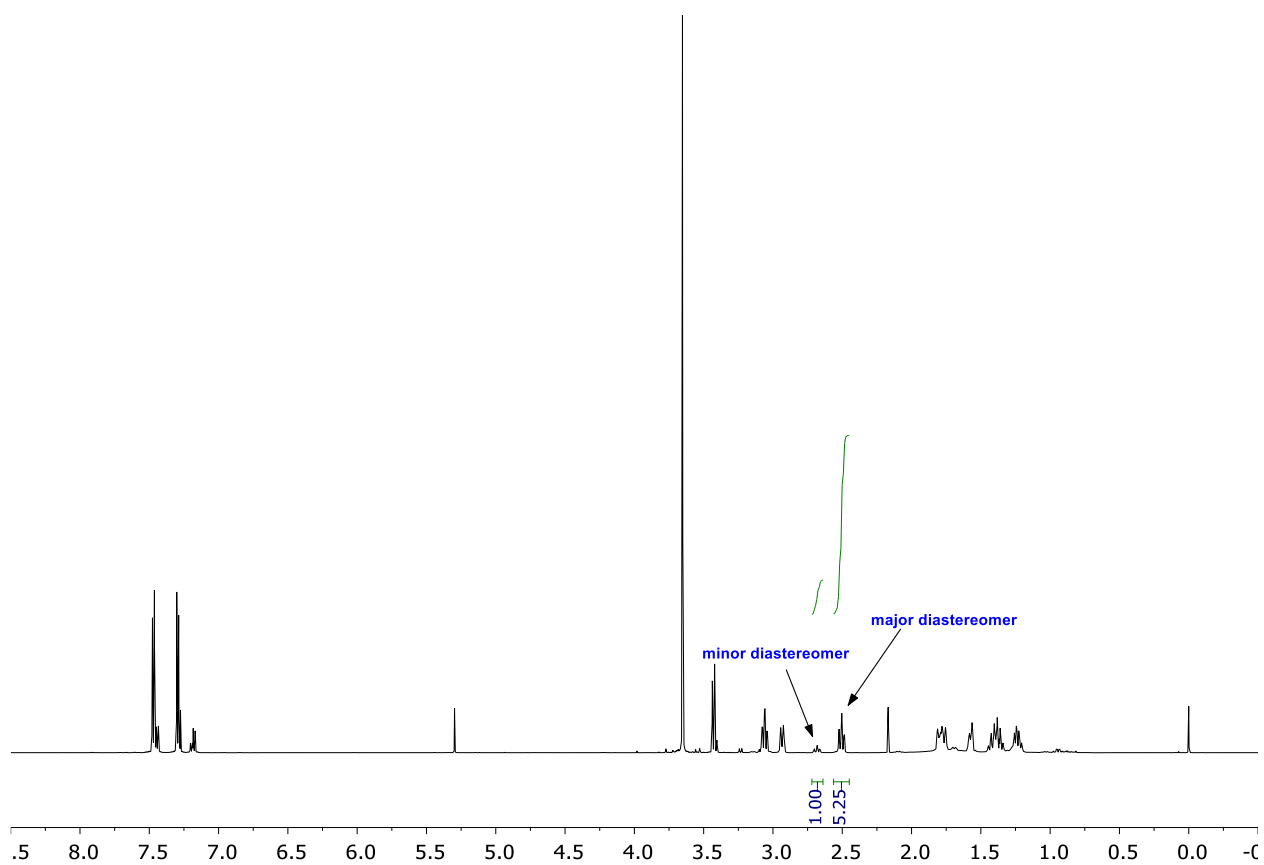

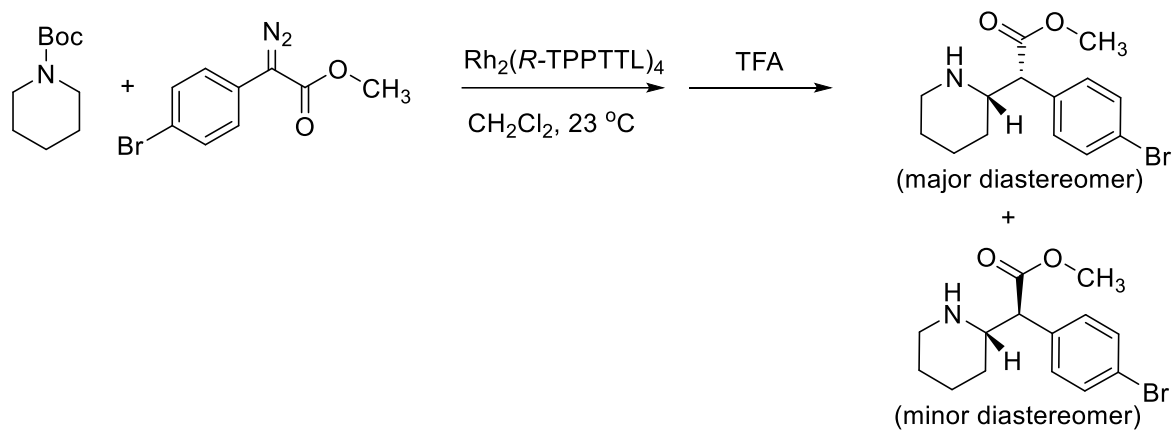

(Table S1, entry 9)

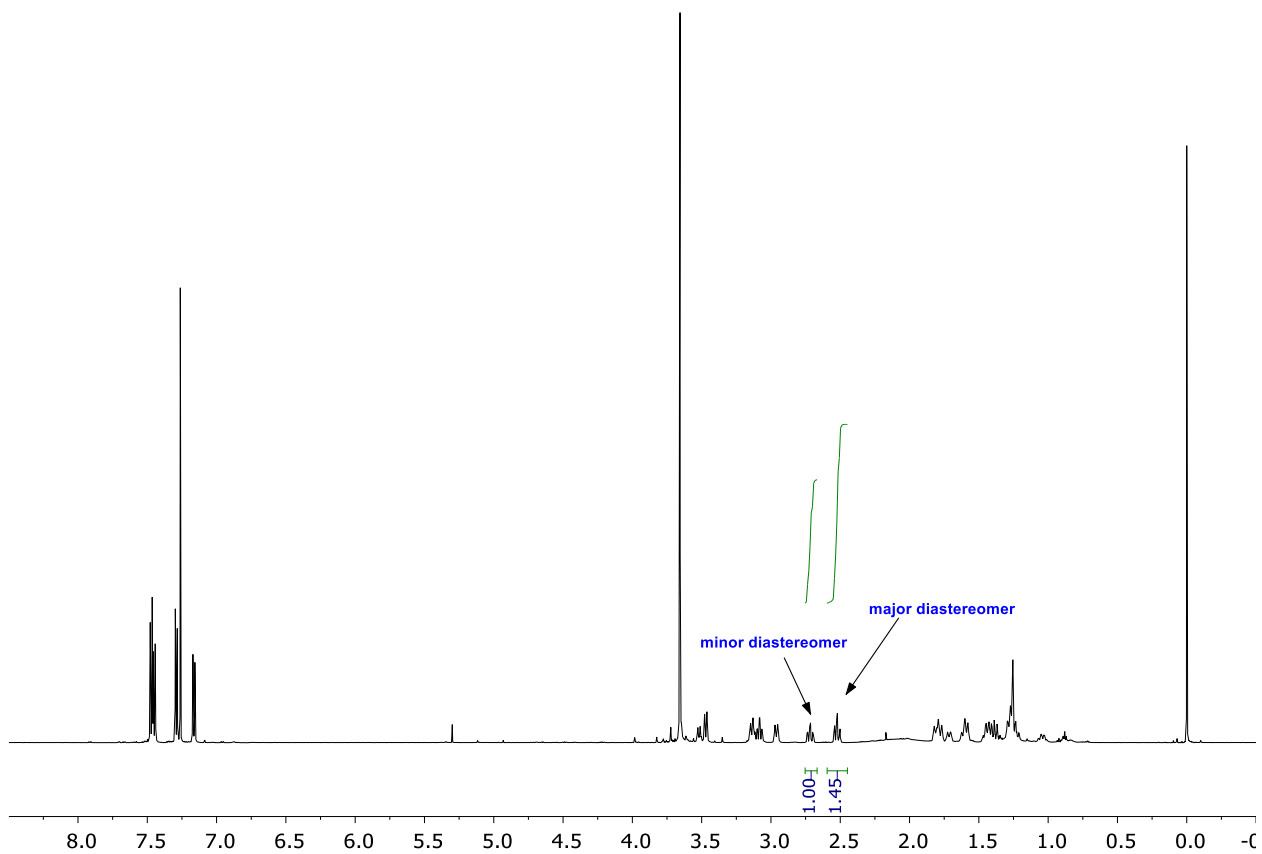

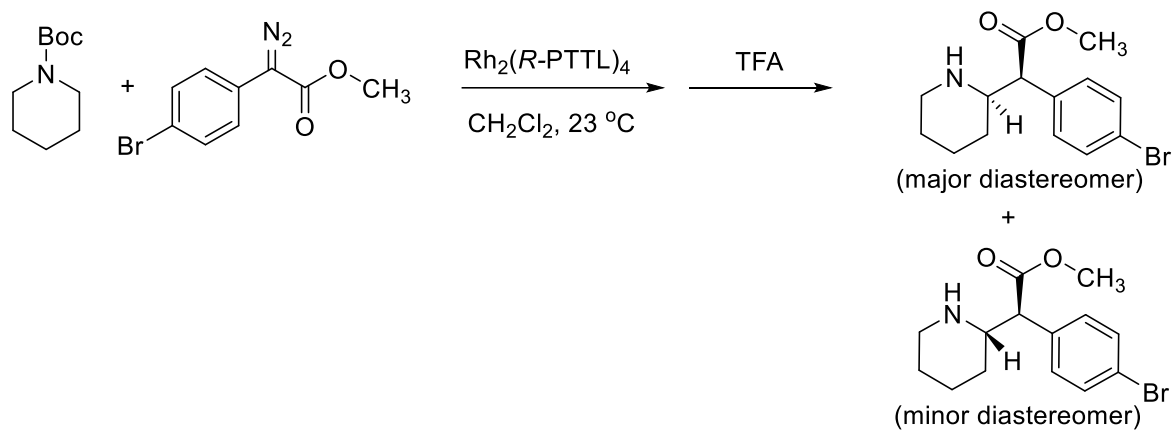

(Table S1, entry 10)

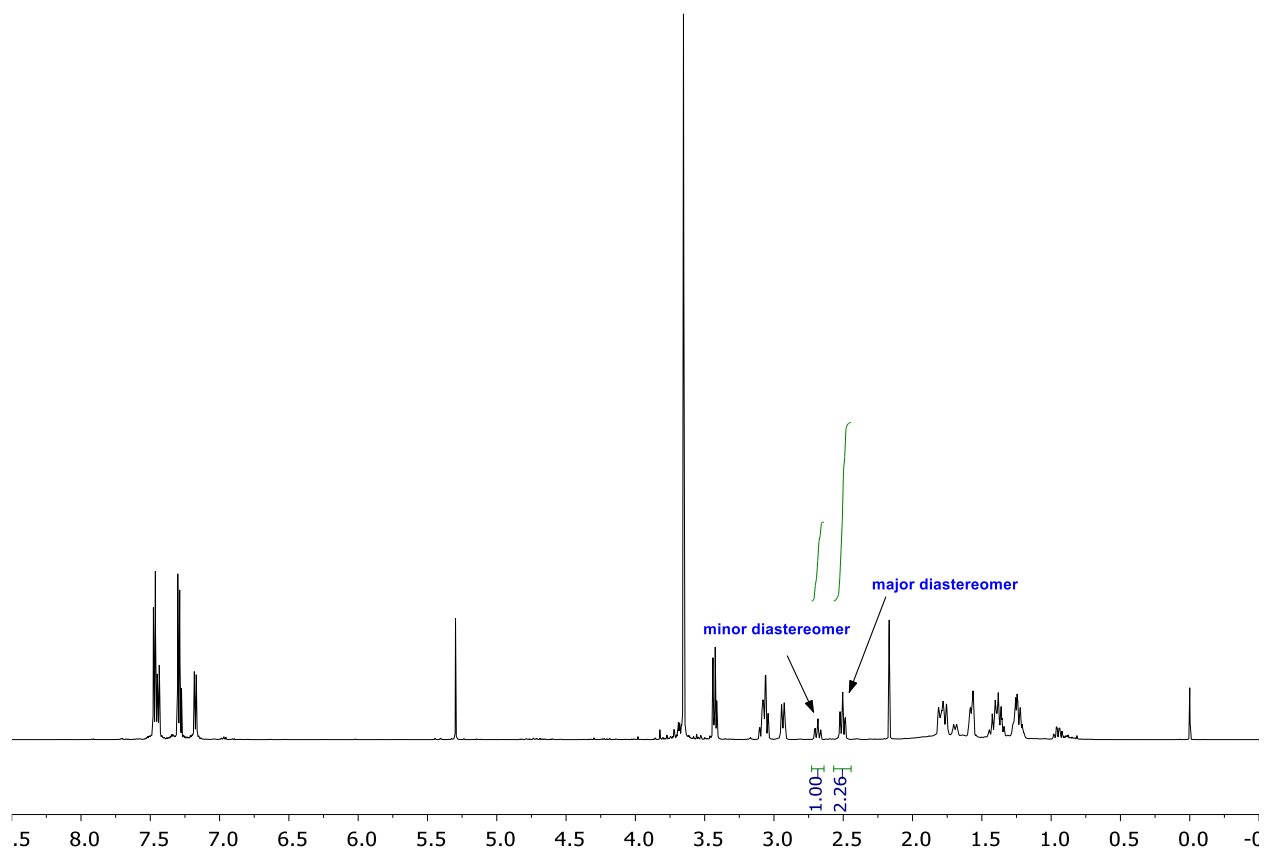

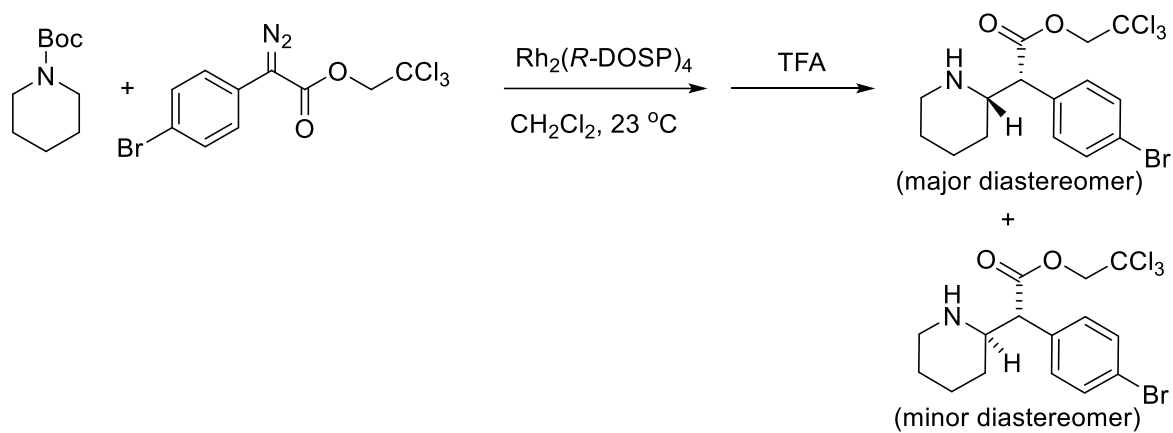

(Table S1, entry 11)

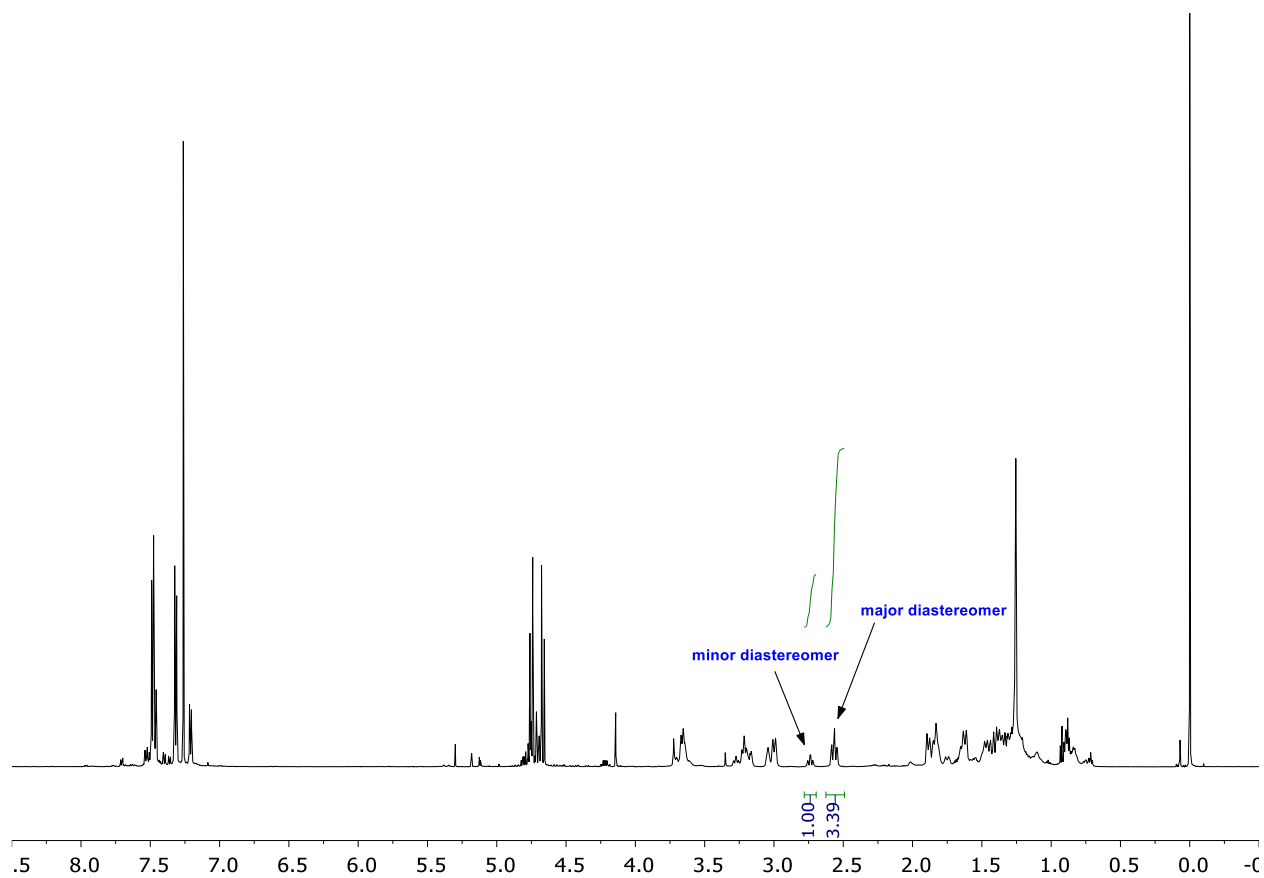

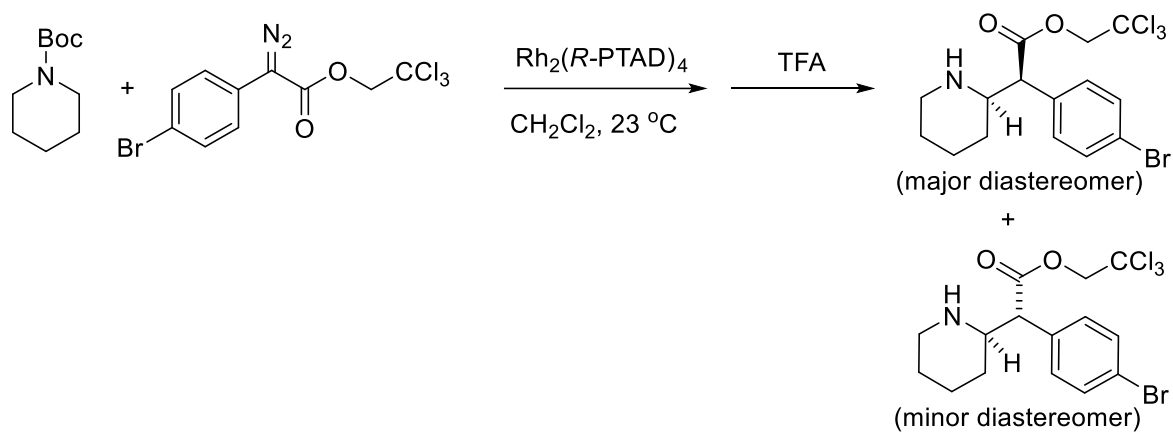

(Table S1, entry 12)

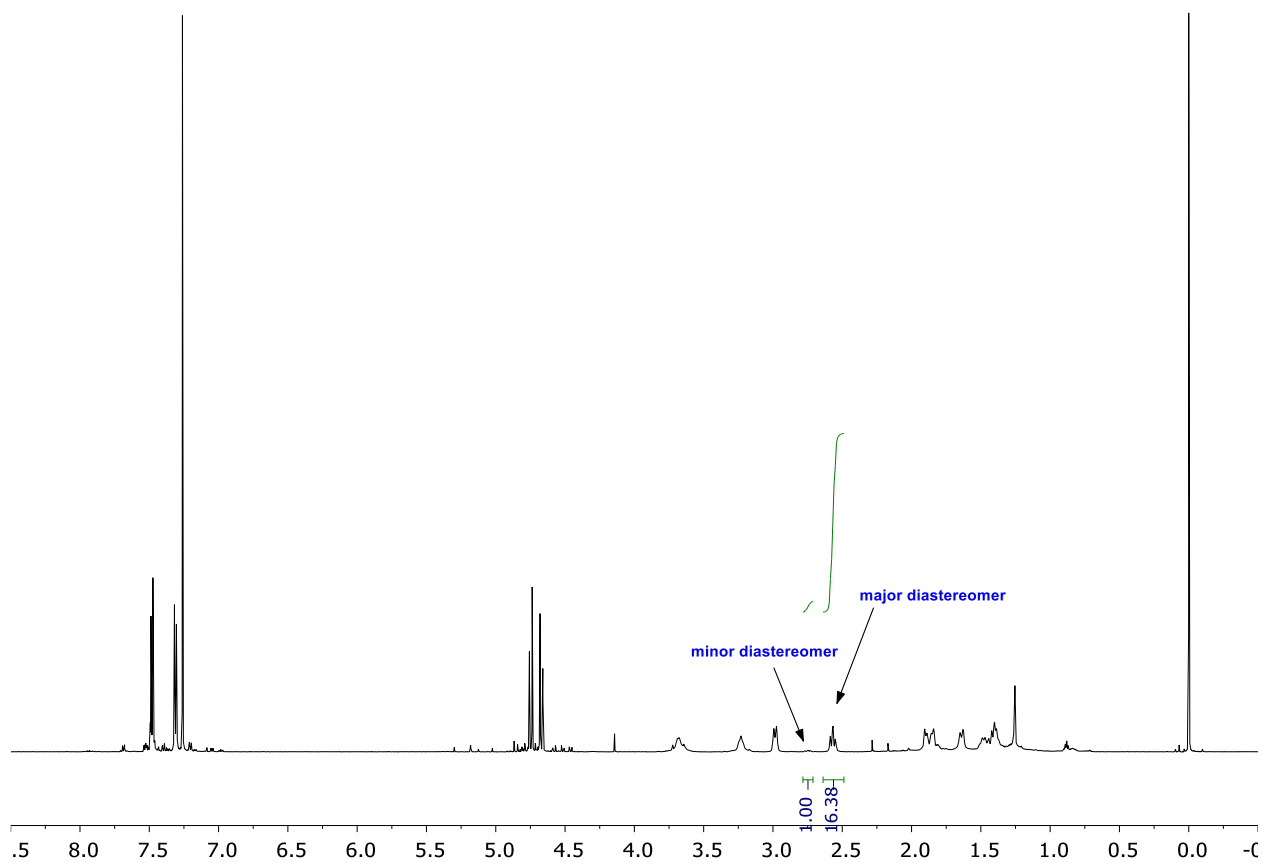



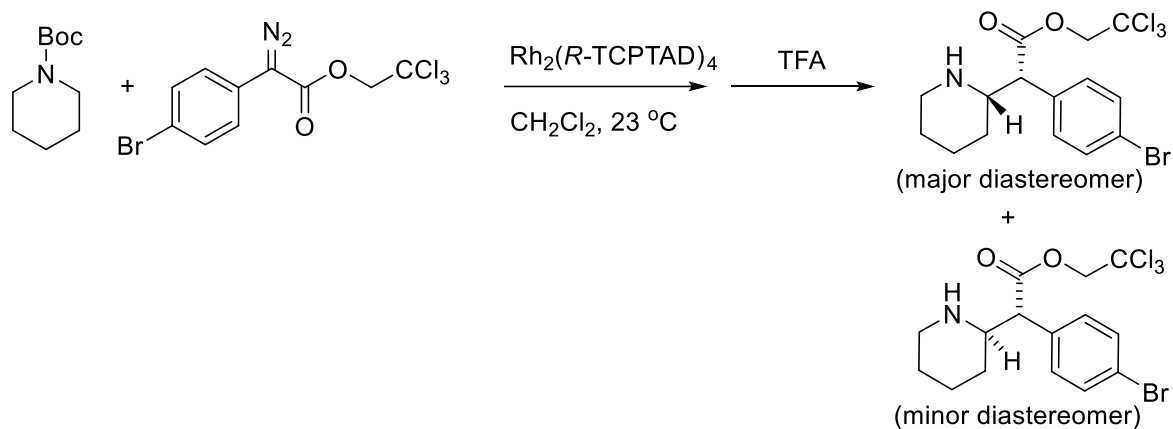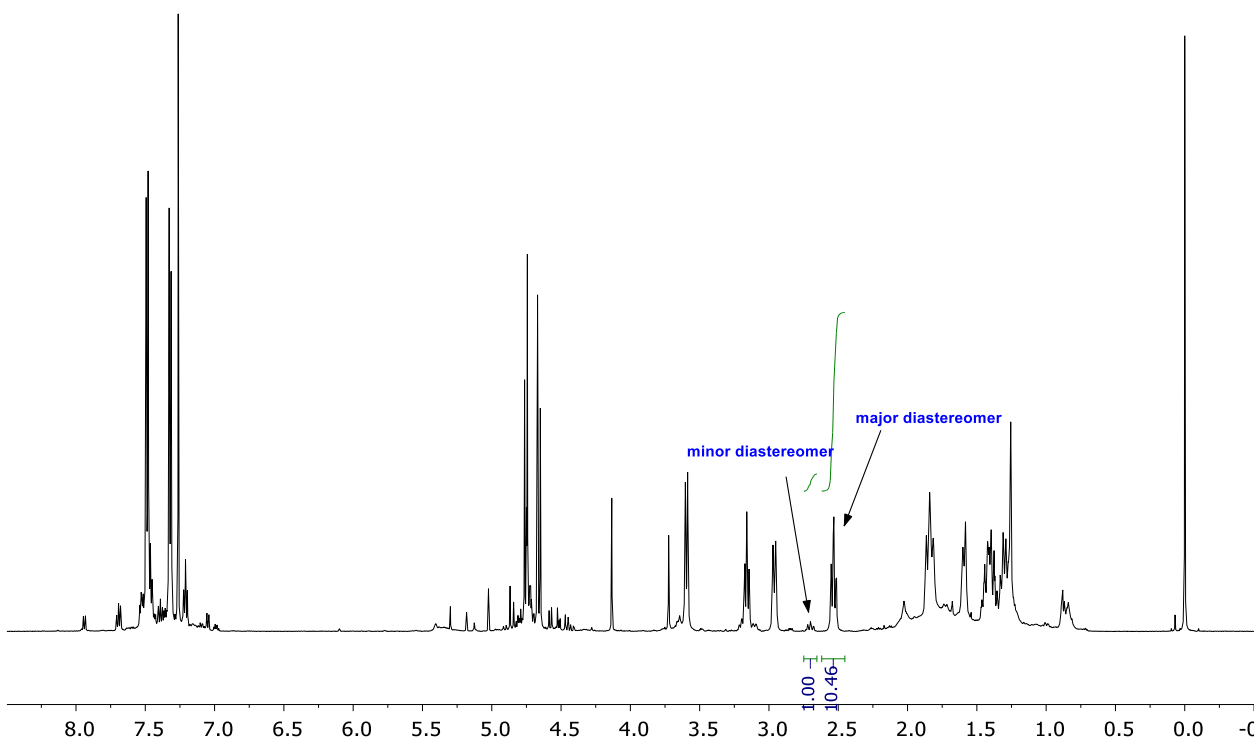

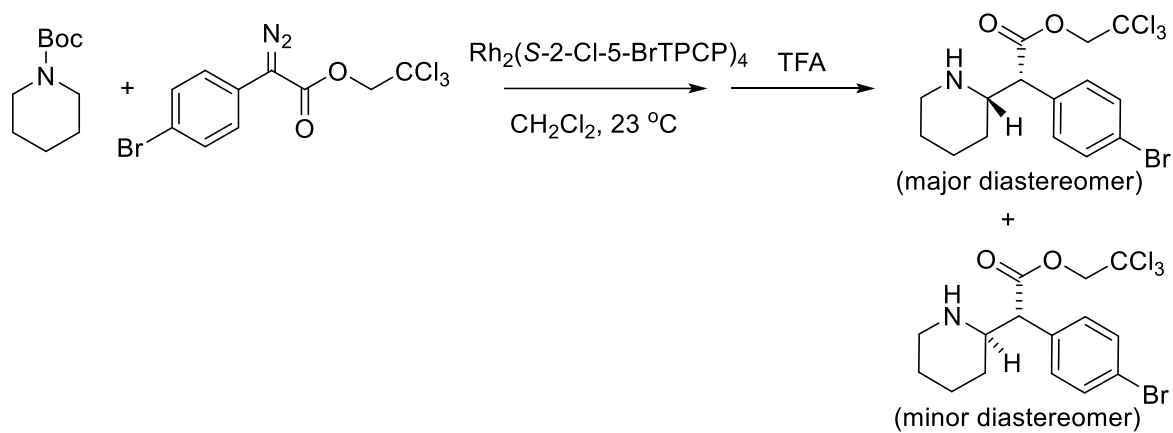

(Table 1, entry 6) (Table S1, entry 14)

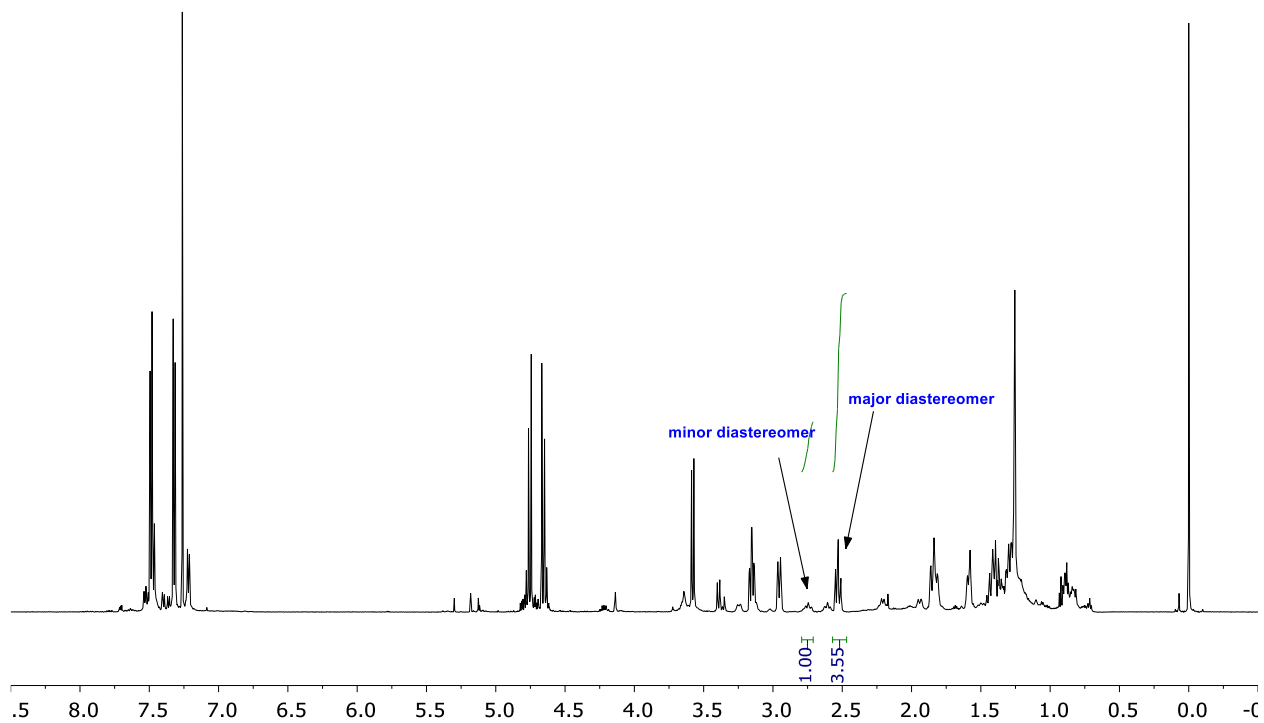

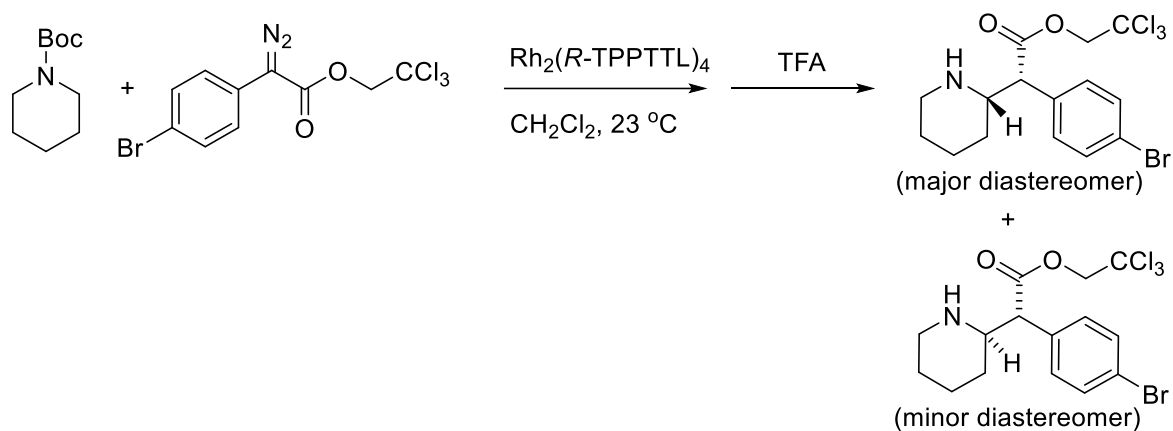

(Table 1, entry 8) (Table S1, entry 15)

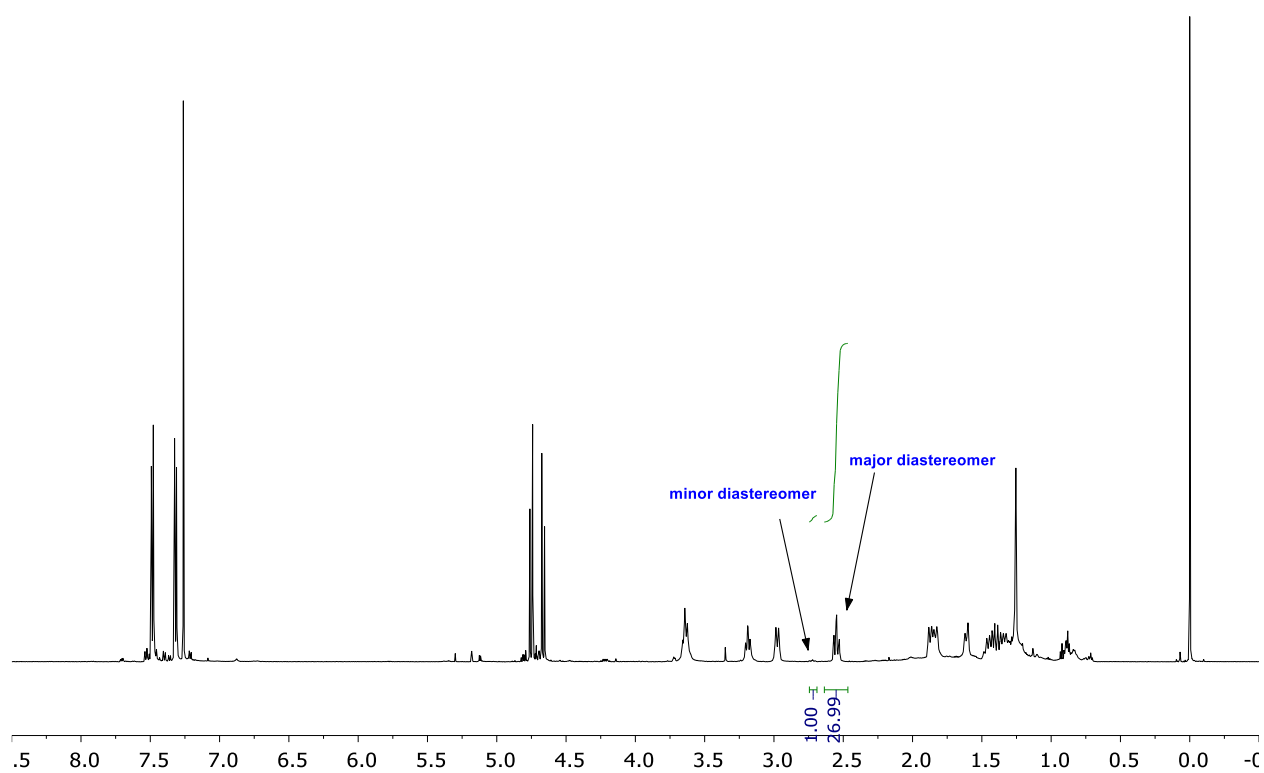

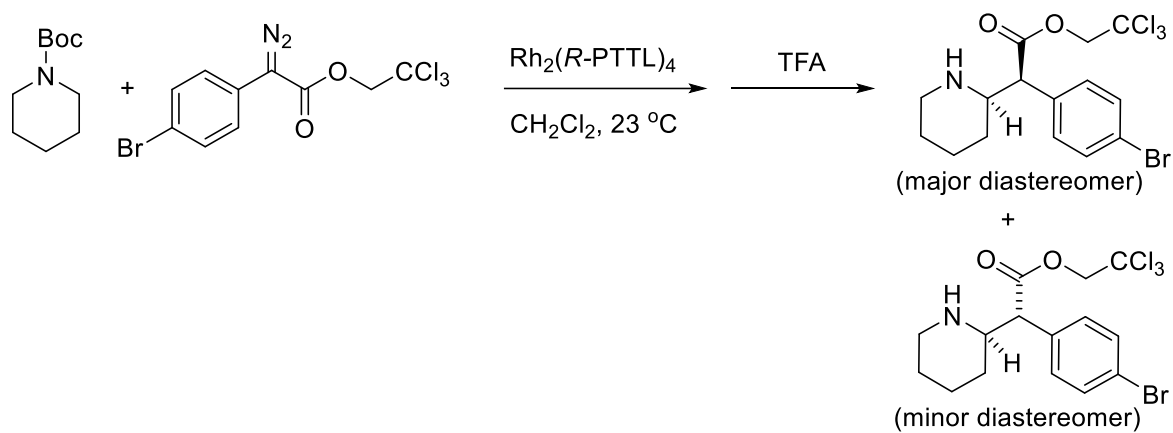

(Table S1, entry 16)

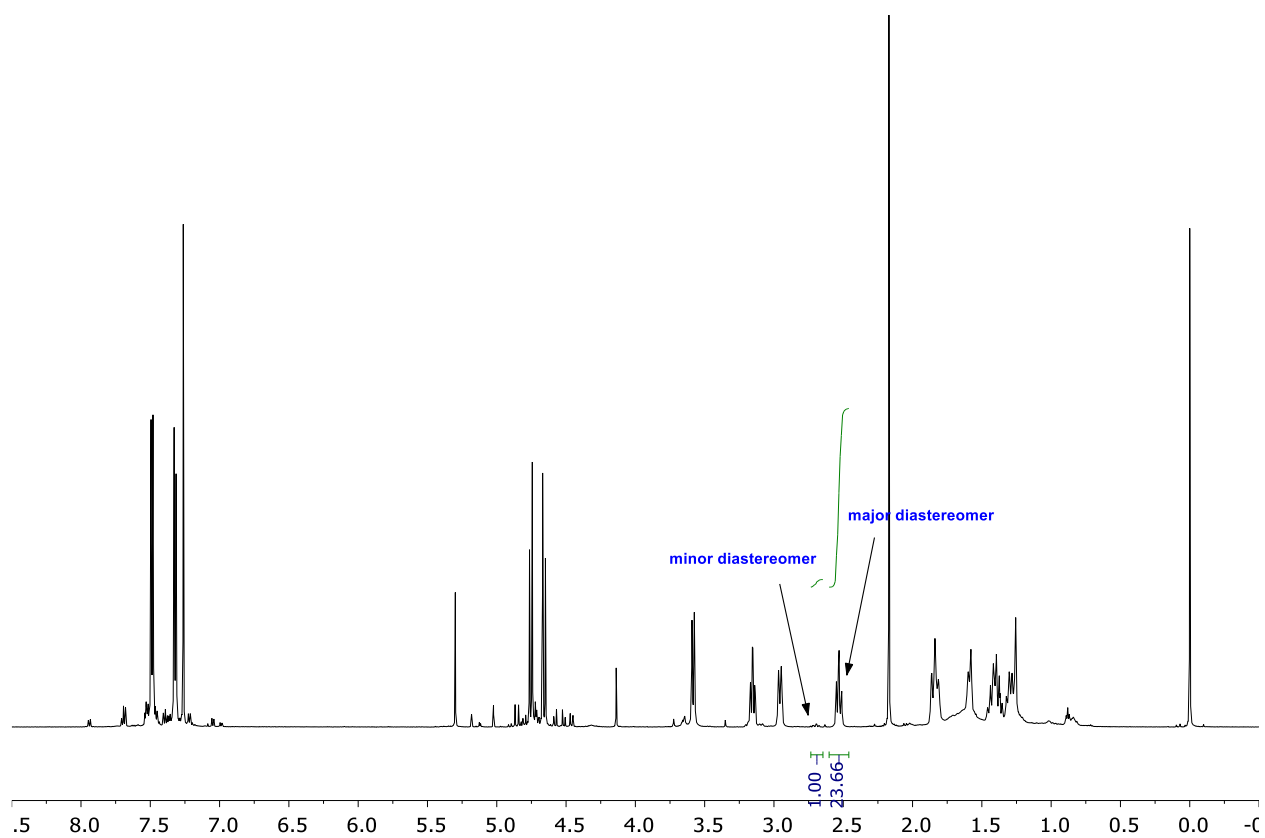

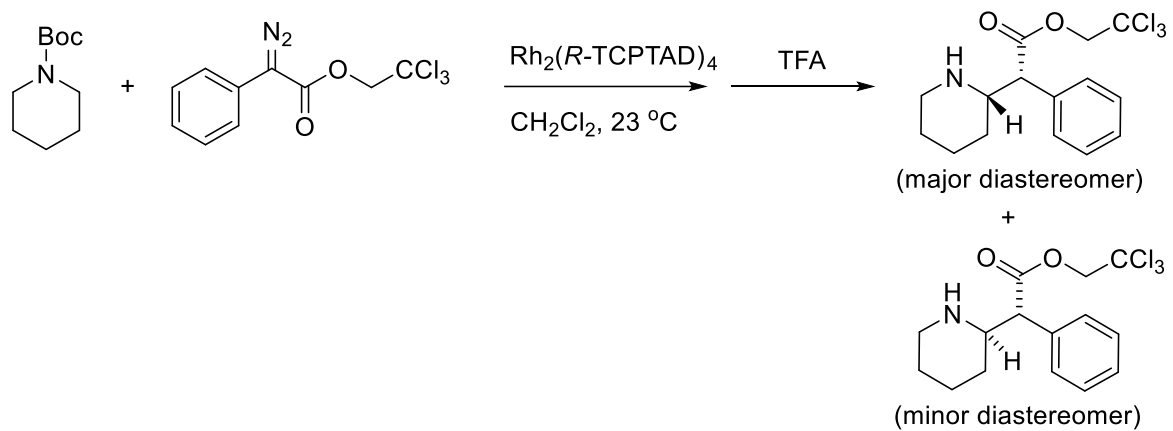

(Scheme 2, **5b**)

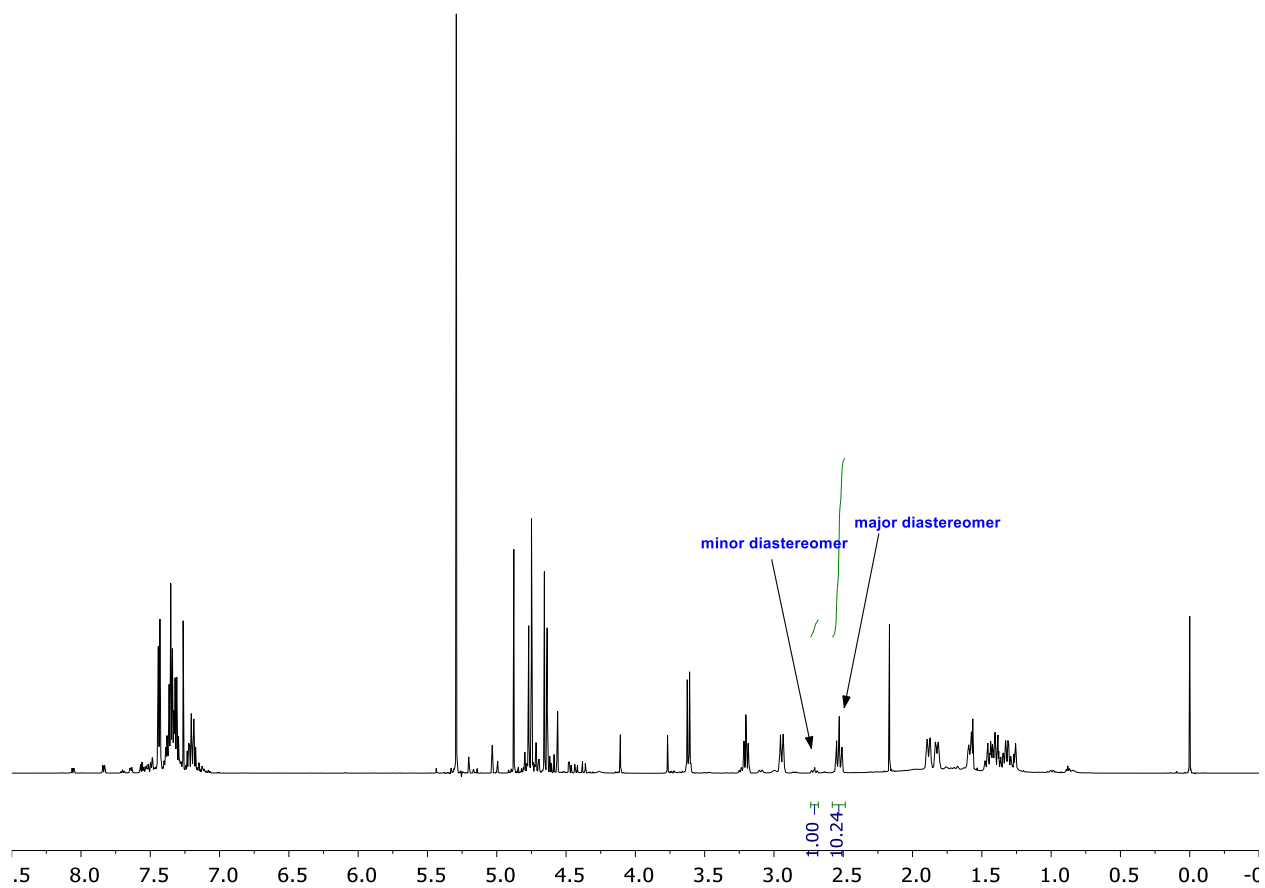

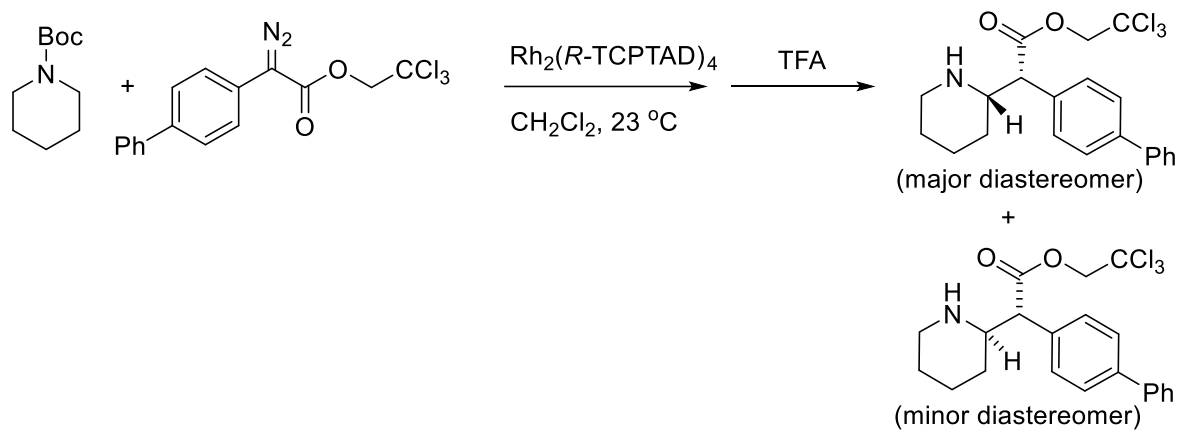

(Scheme 2, **5c**)

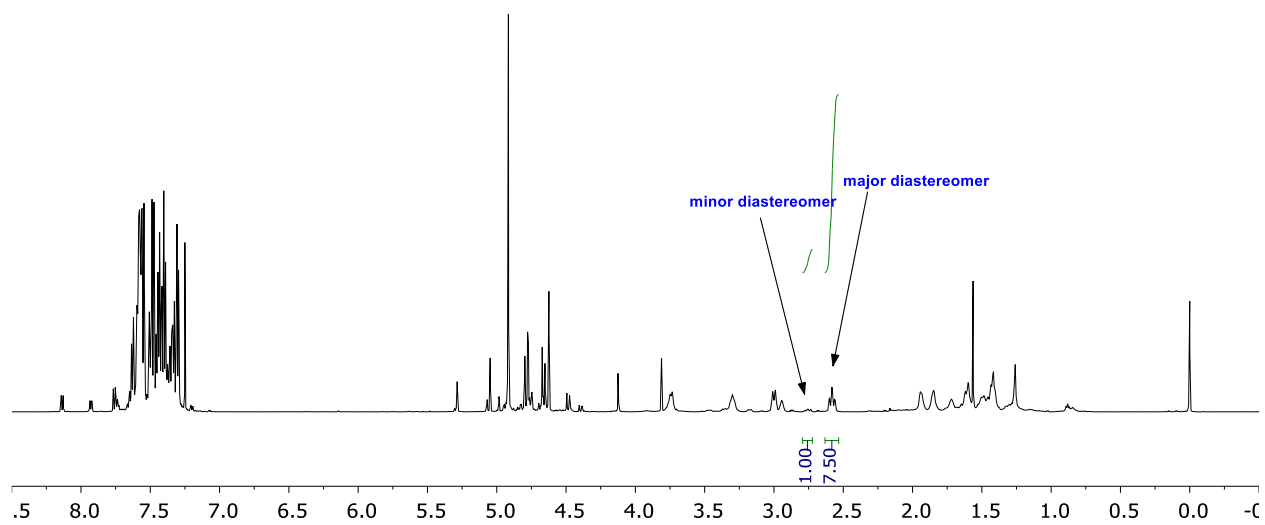

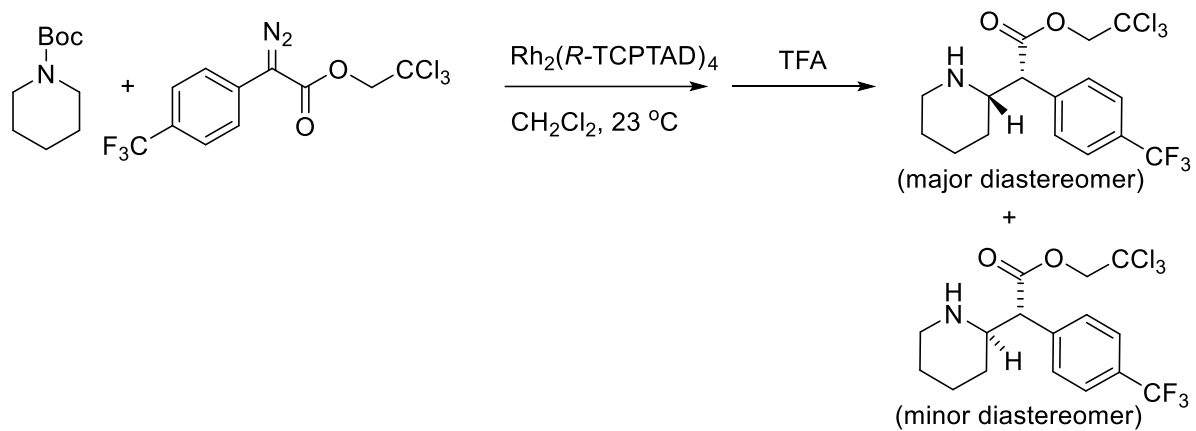

(Scheme 2, **5d**)

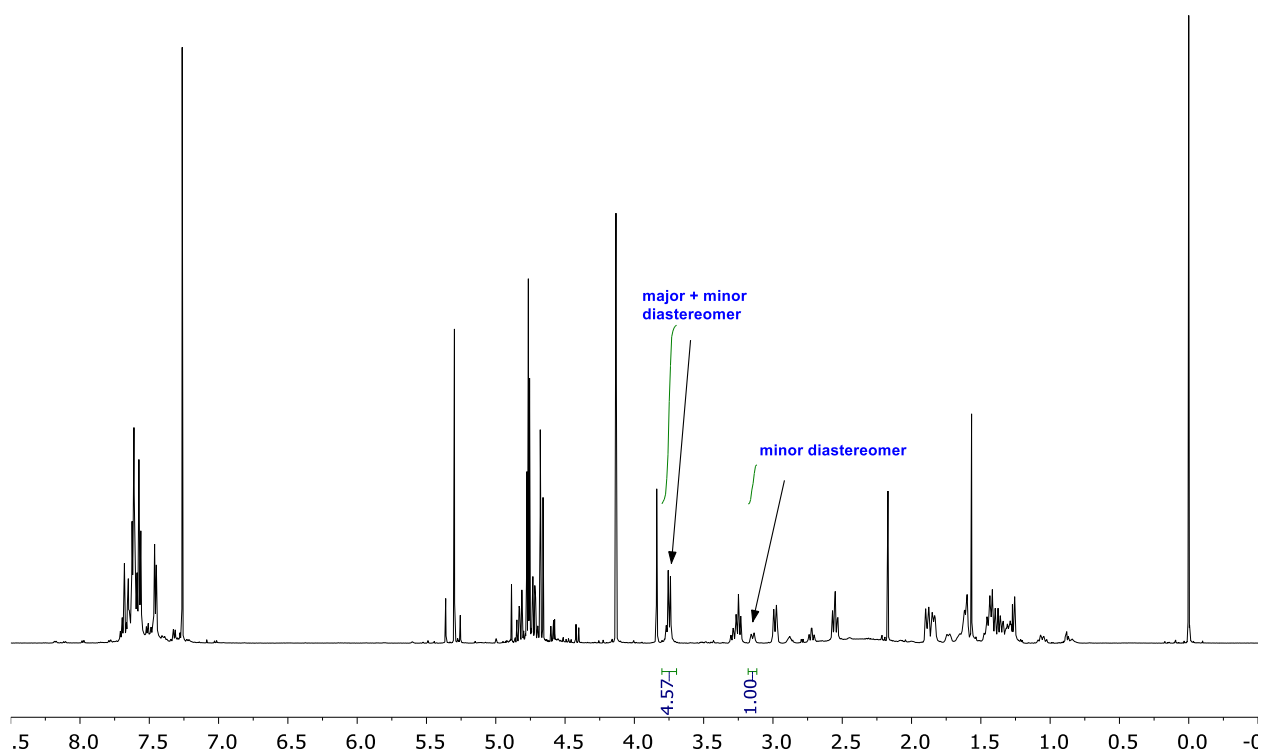

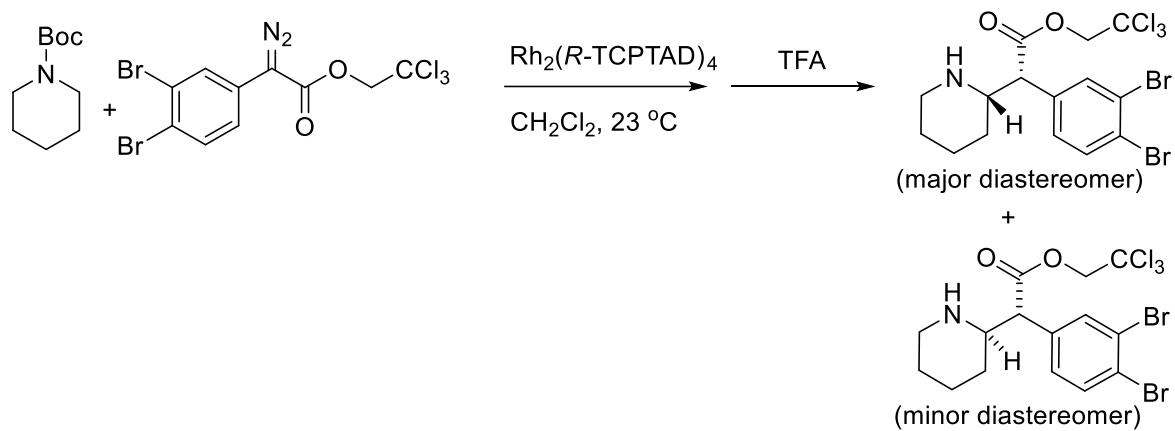

(Scheme 2, **5e**)

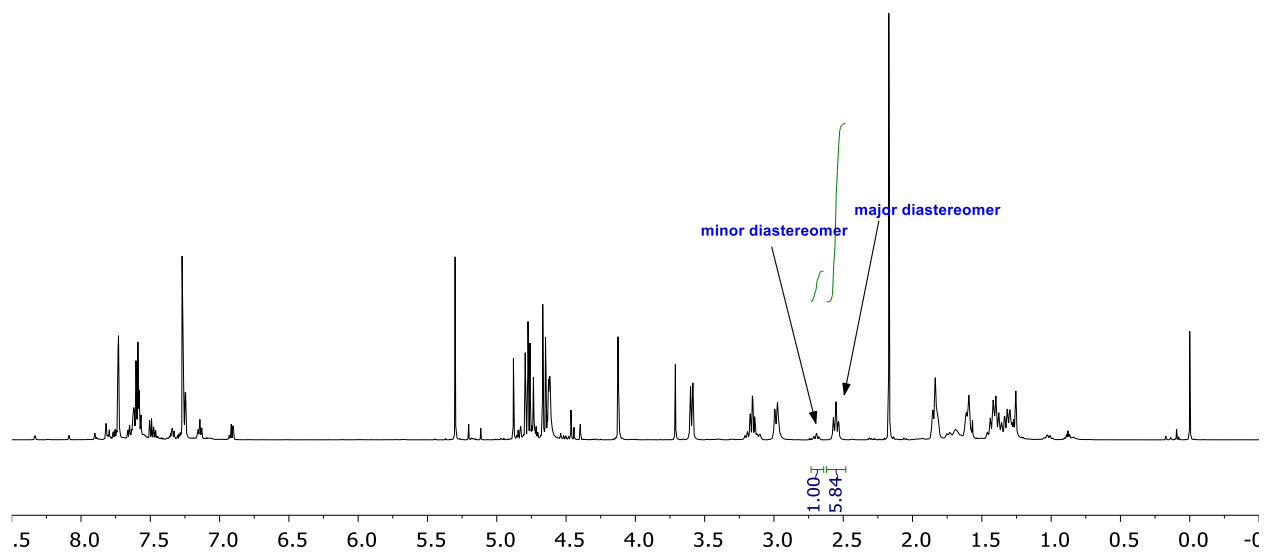



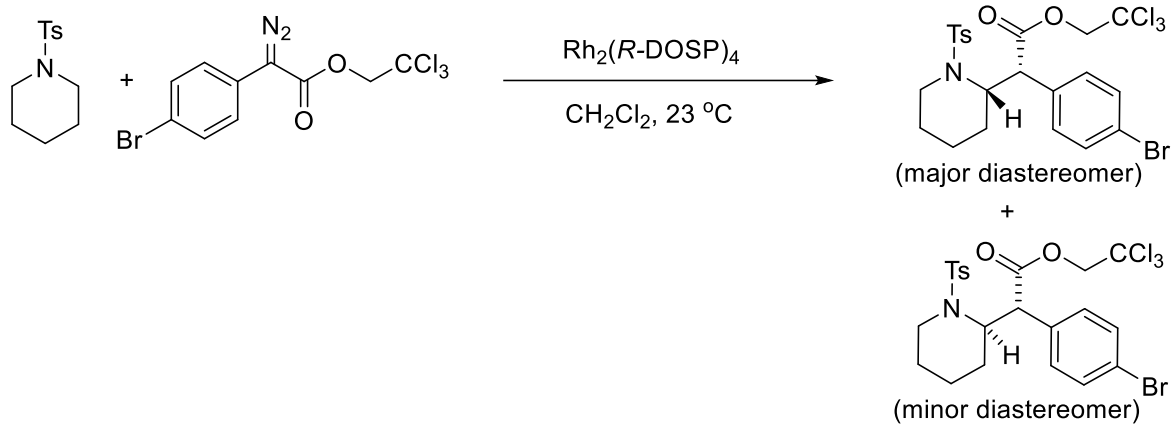

(Table S2, entry 1)

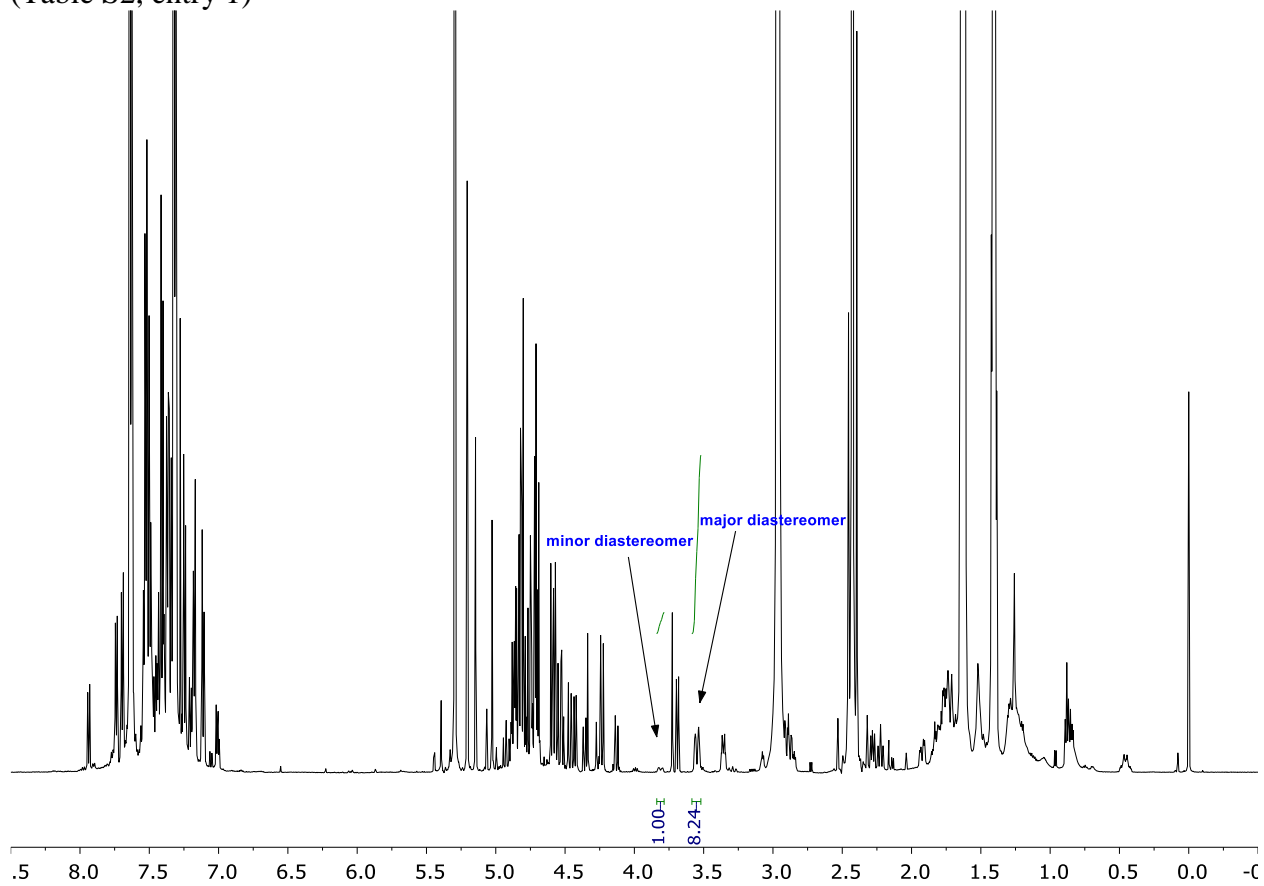

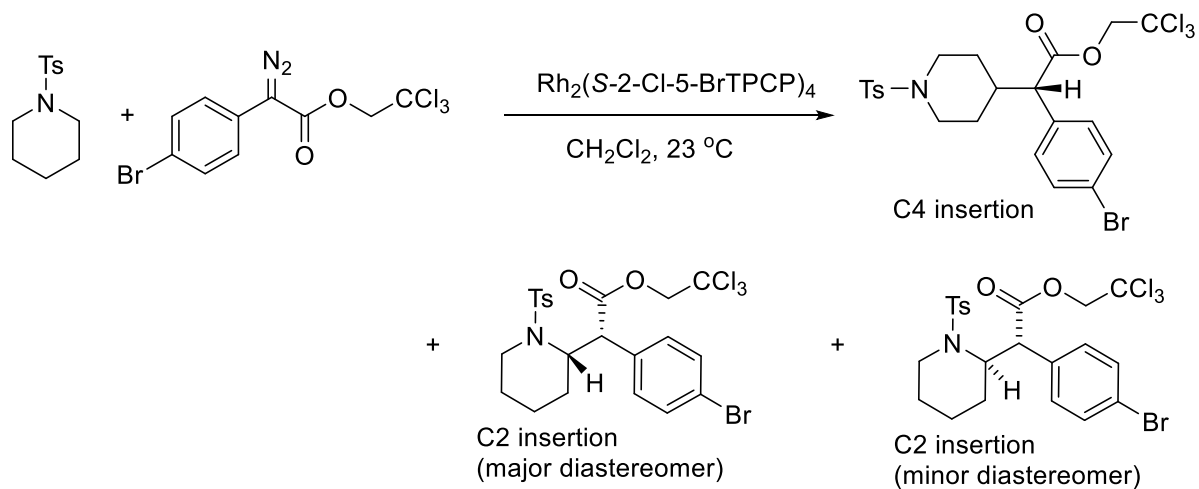

(Table S2, entry 2)

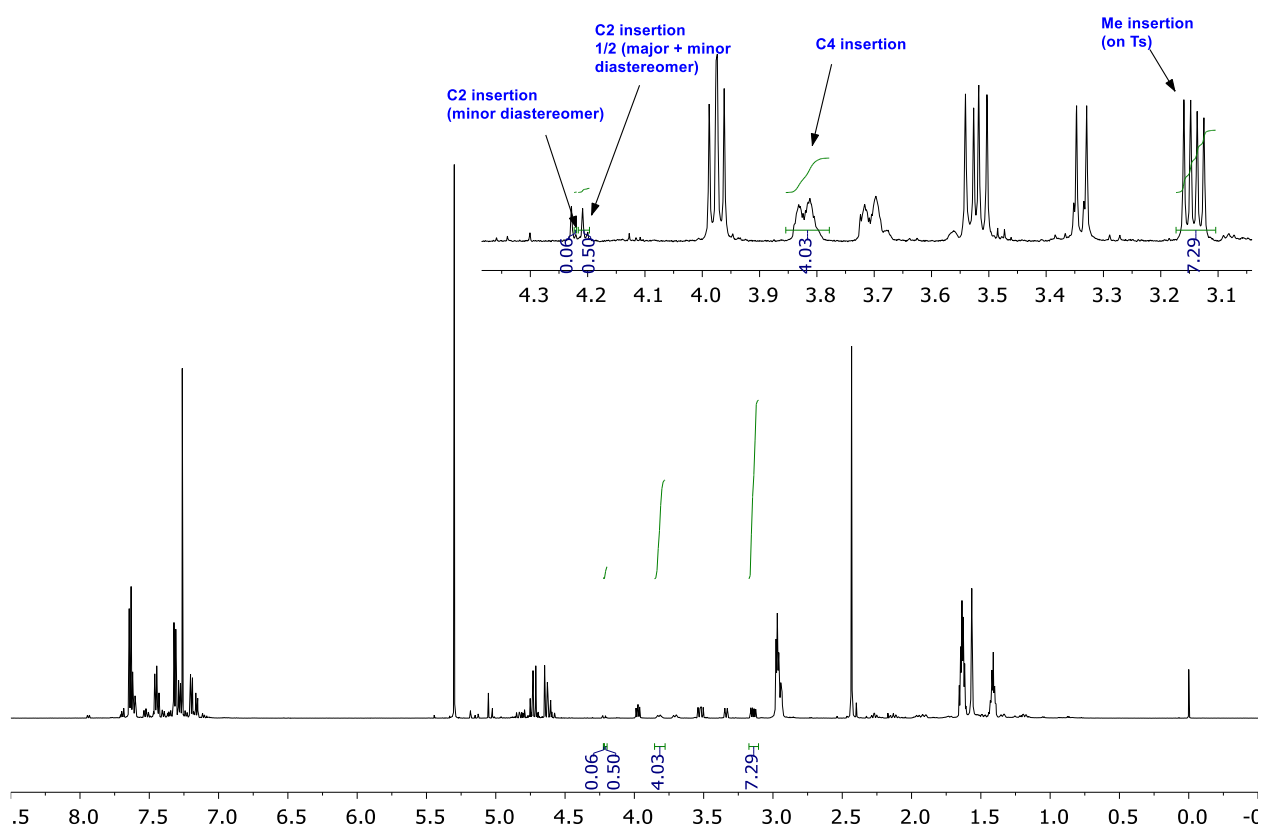

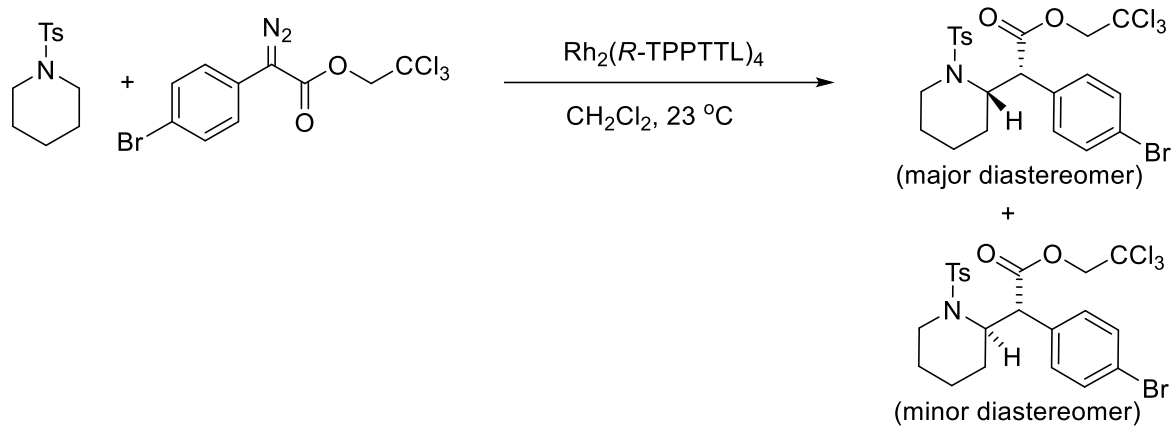

(Table S2, entry 3)

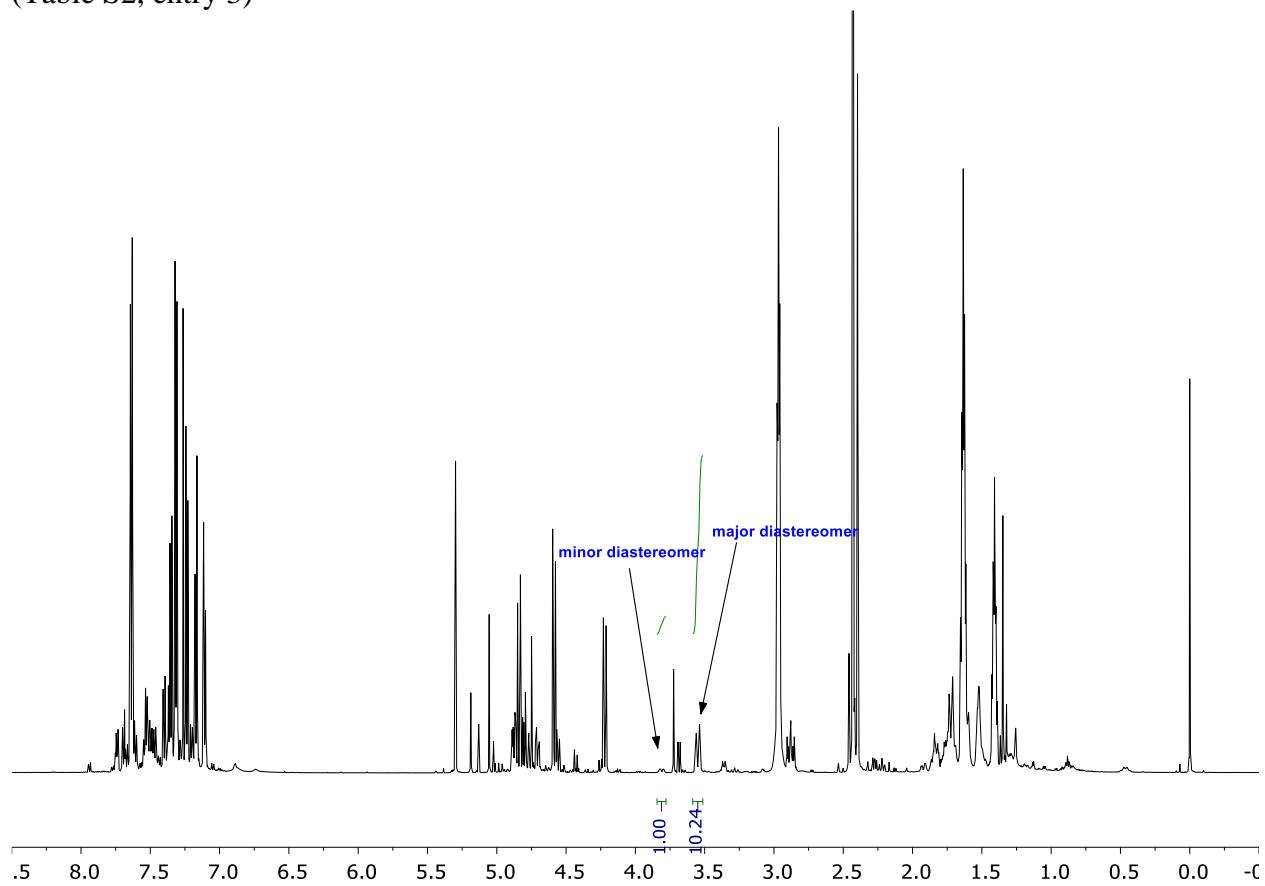

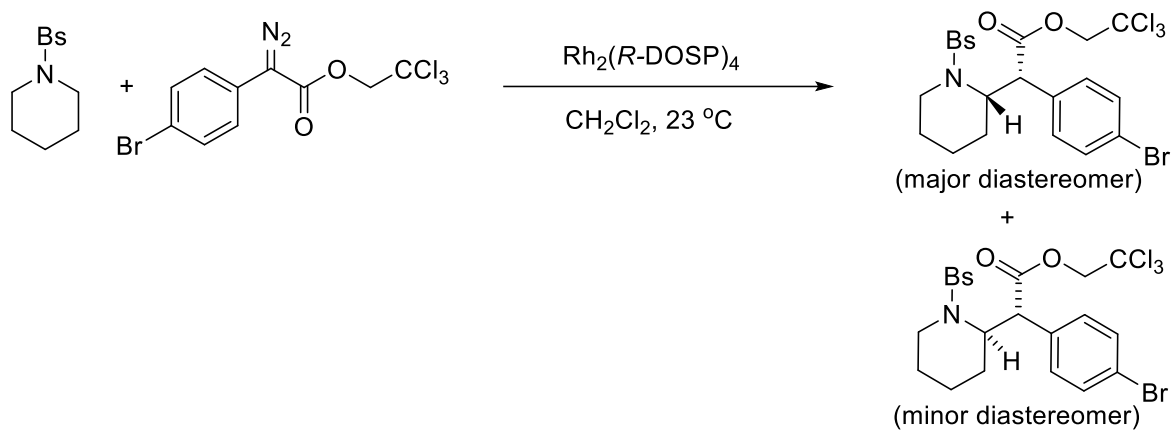

(Table S2, entry 4)

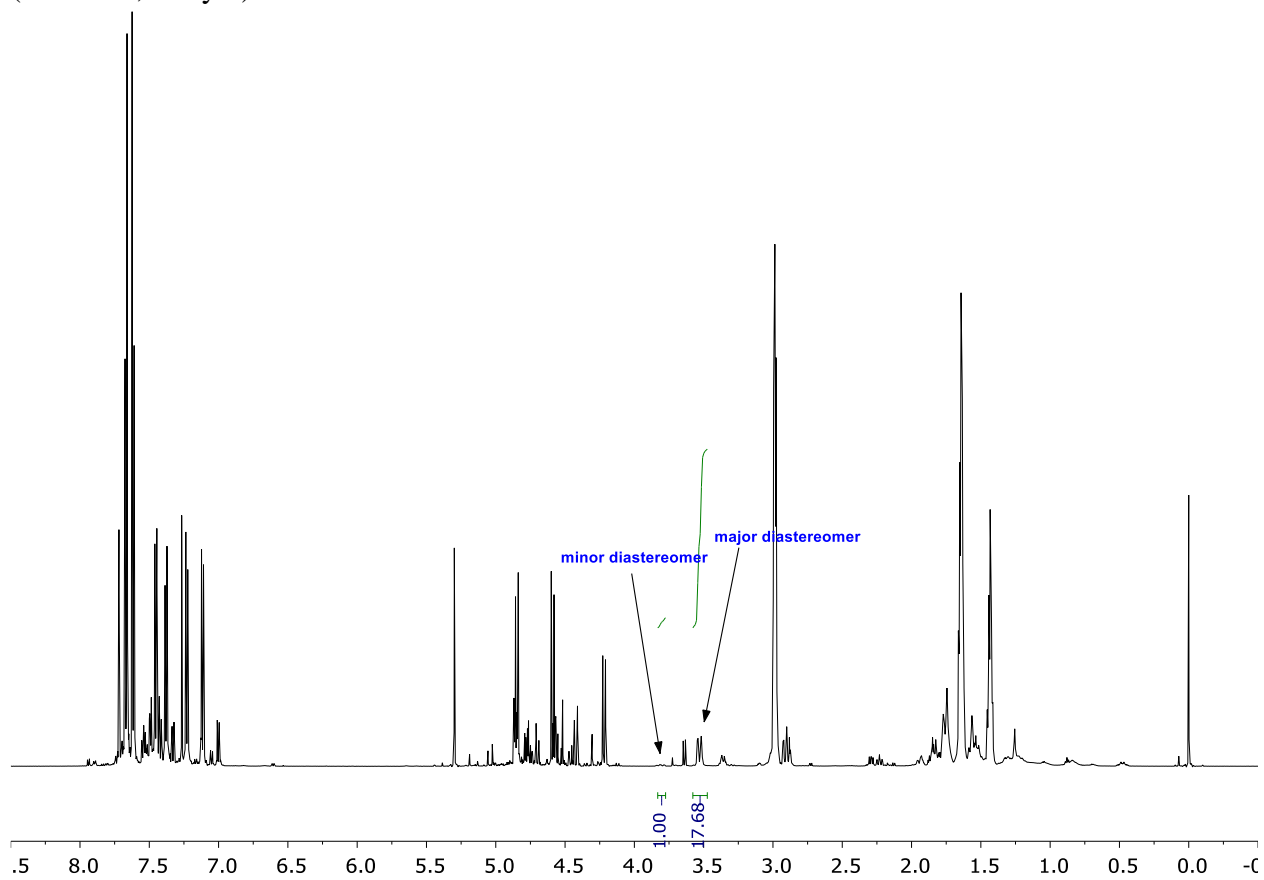

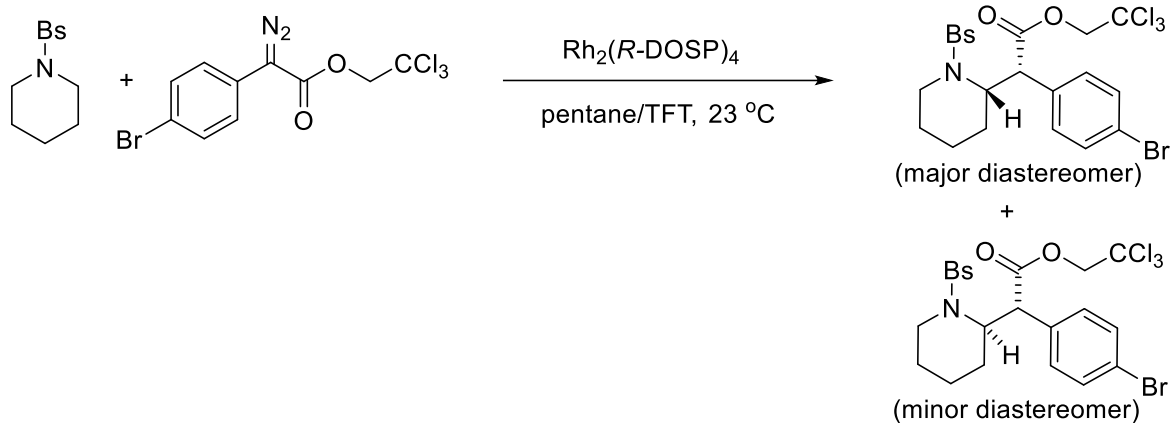

(Table S2, entry 5)

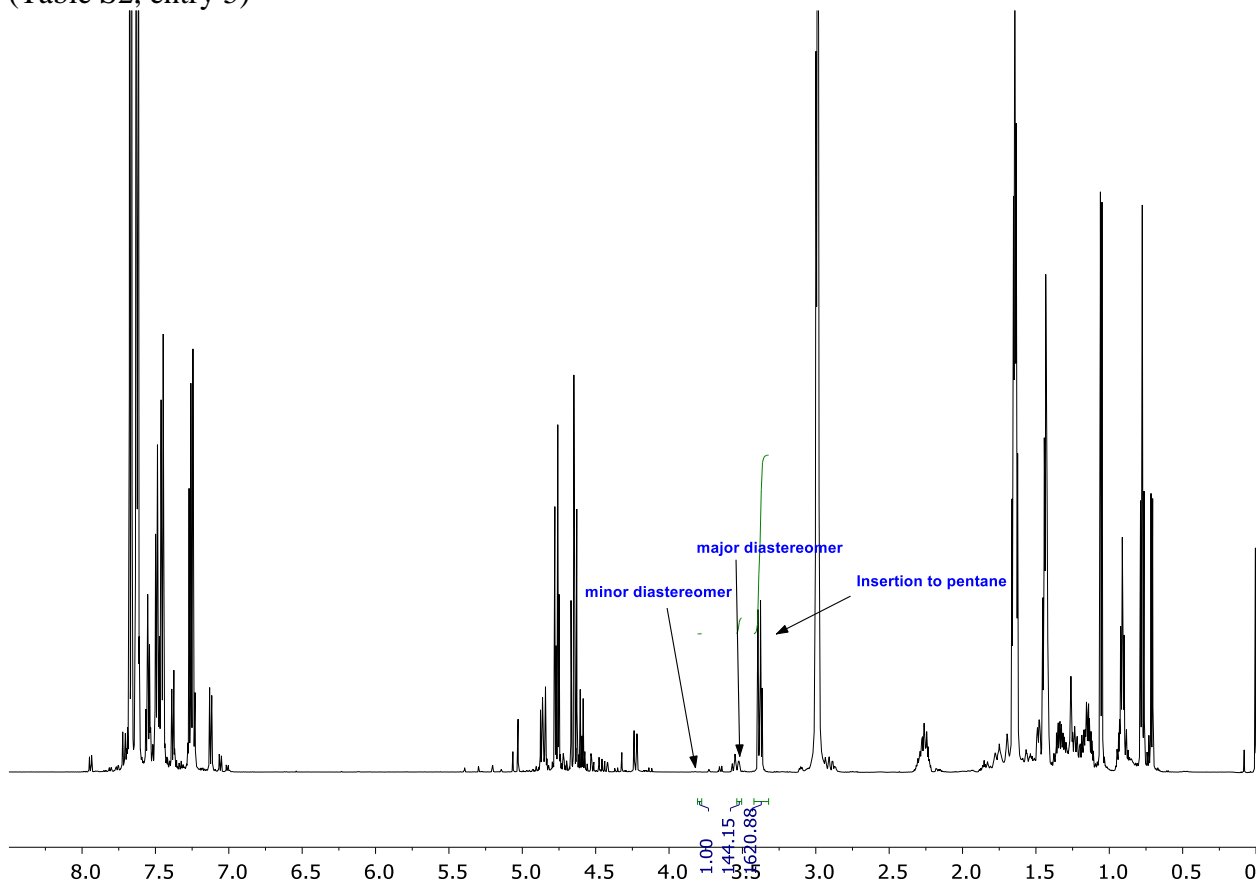

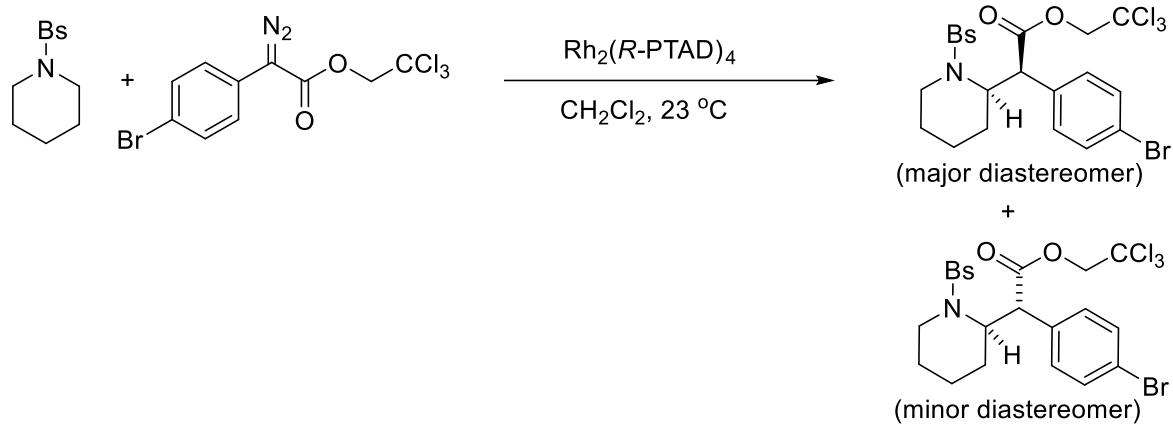

(Table S2, entry 7)

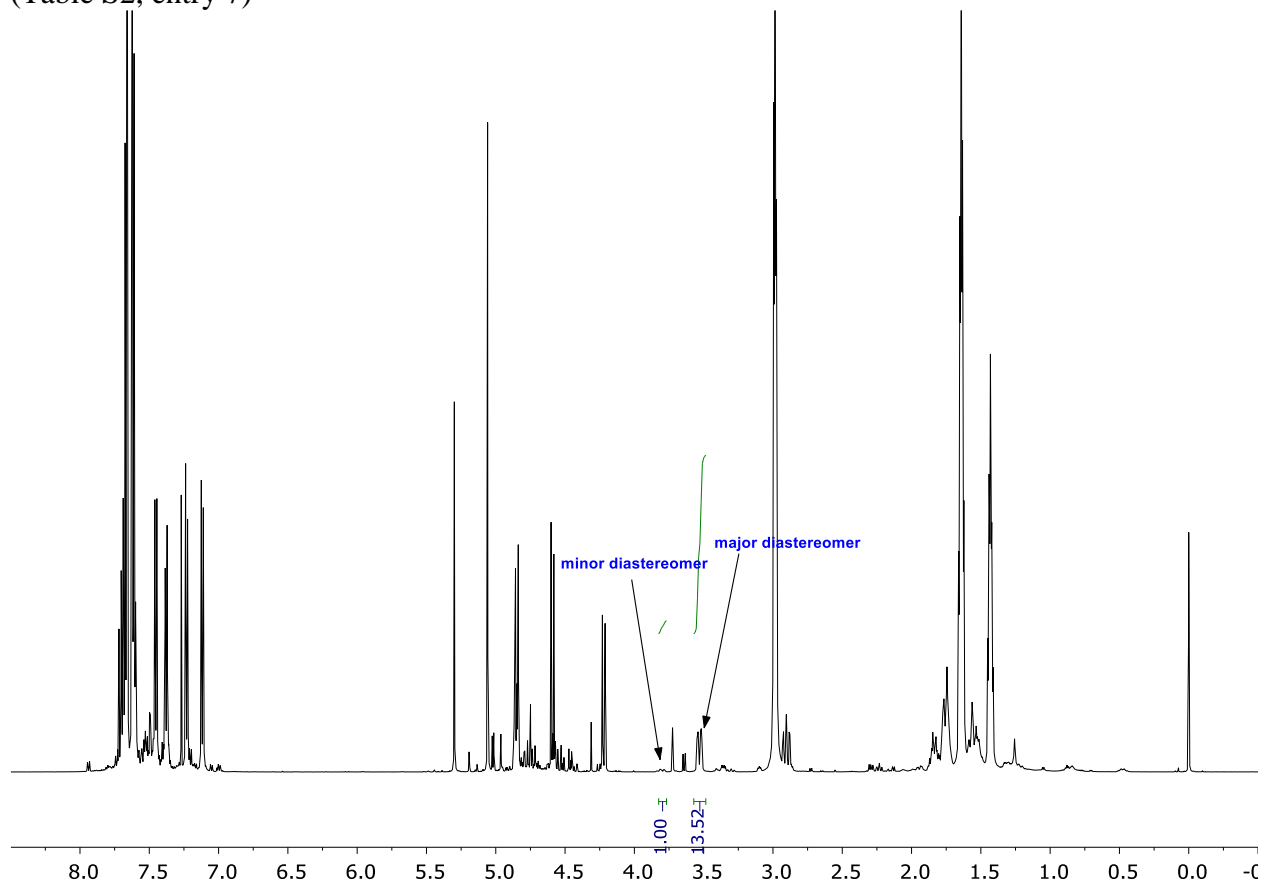

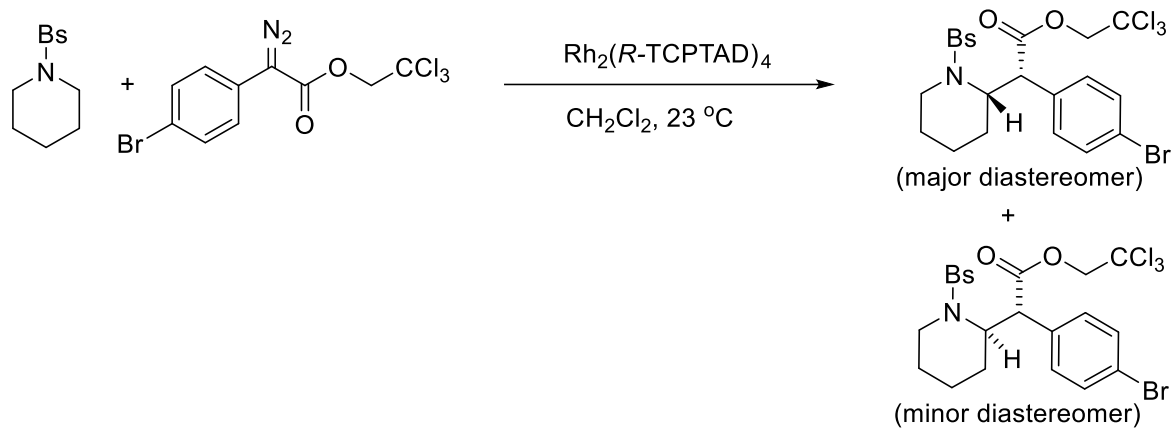

(Table S2, entry 8)

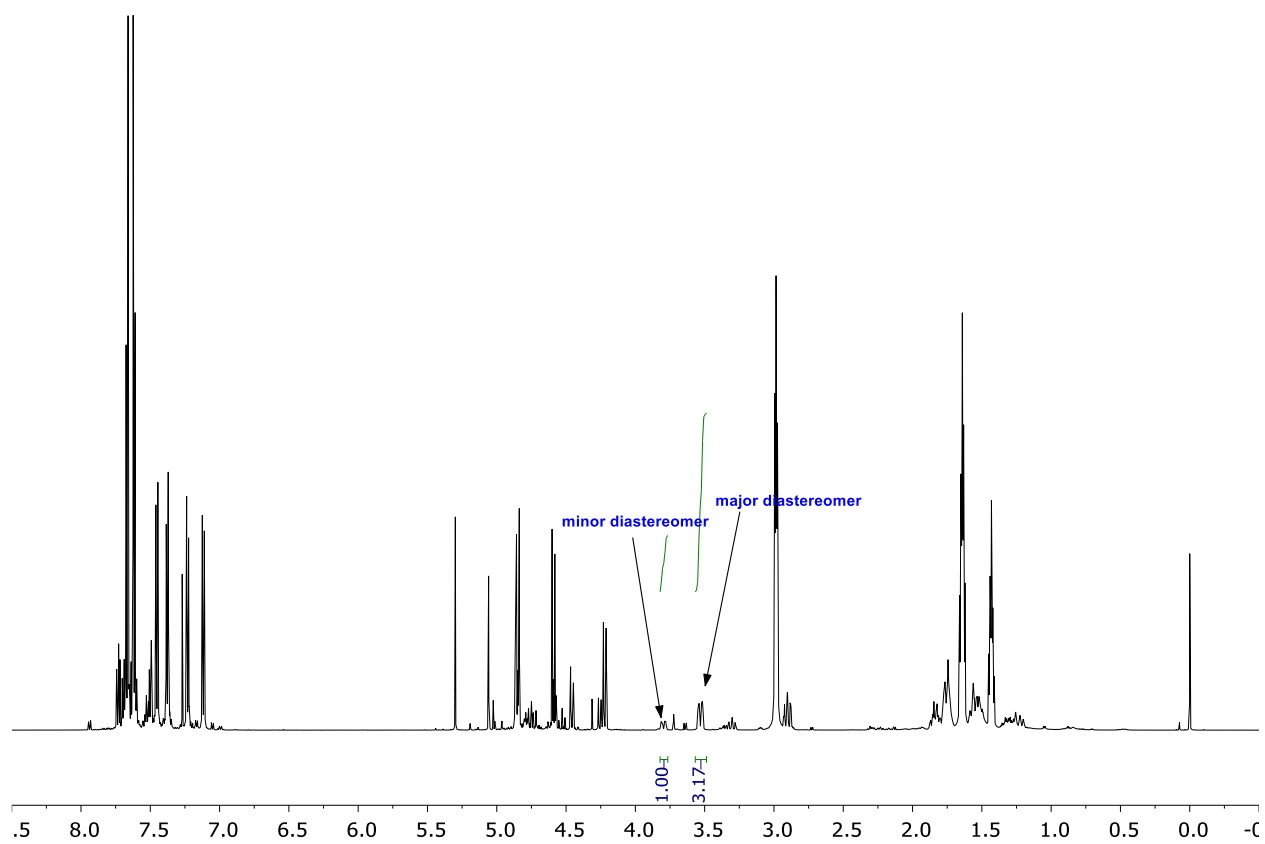

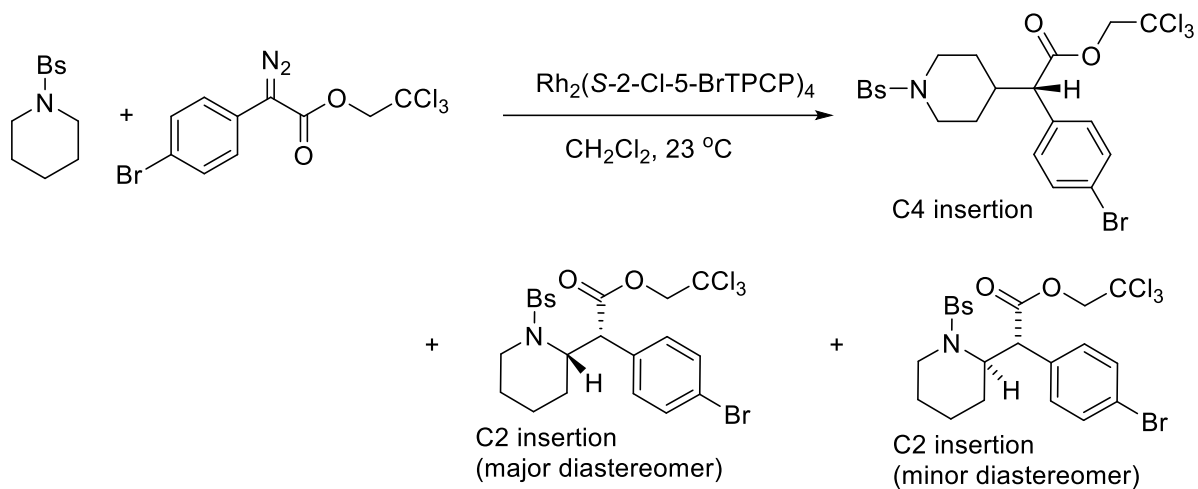

(Table S2, entry 12)

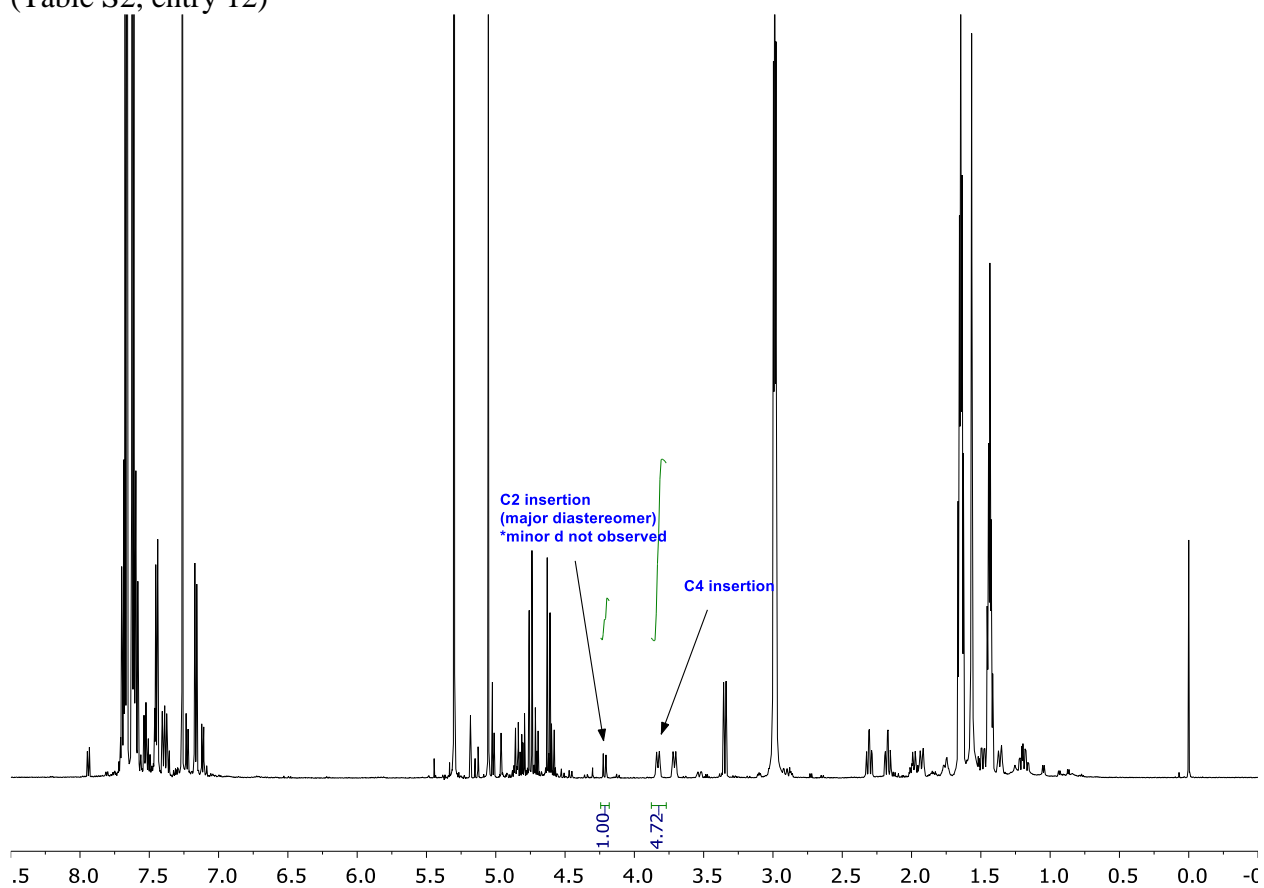



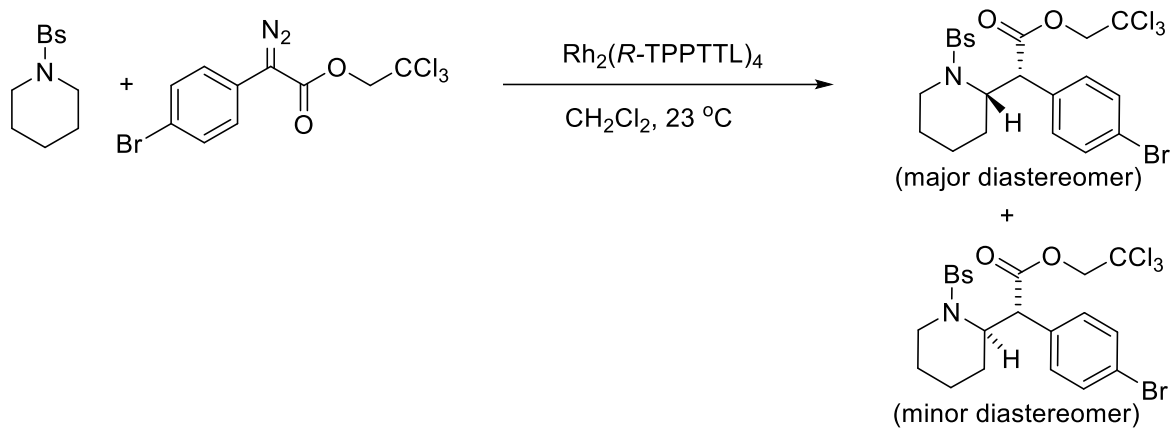

(Table 1, entry 9) (Table S2, entry 13)

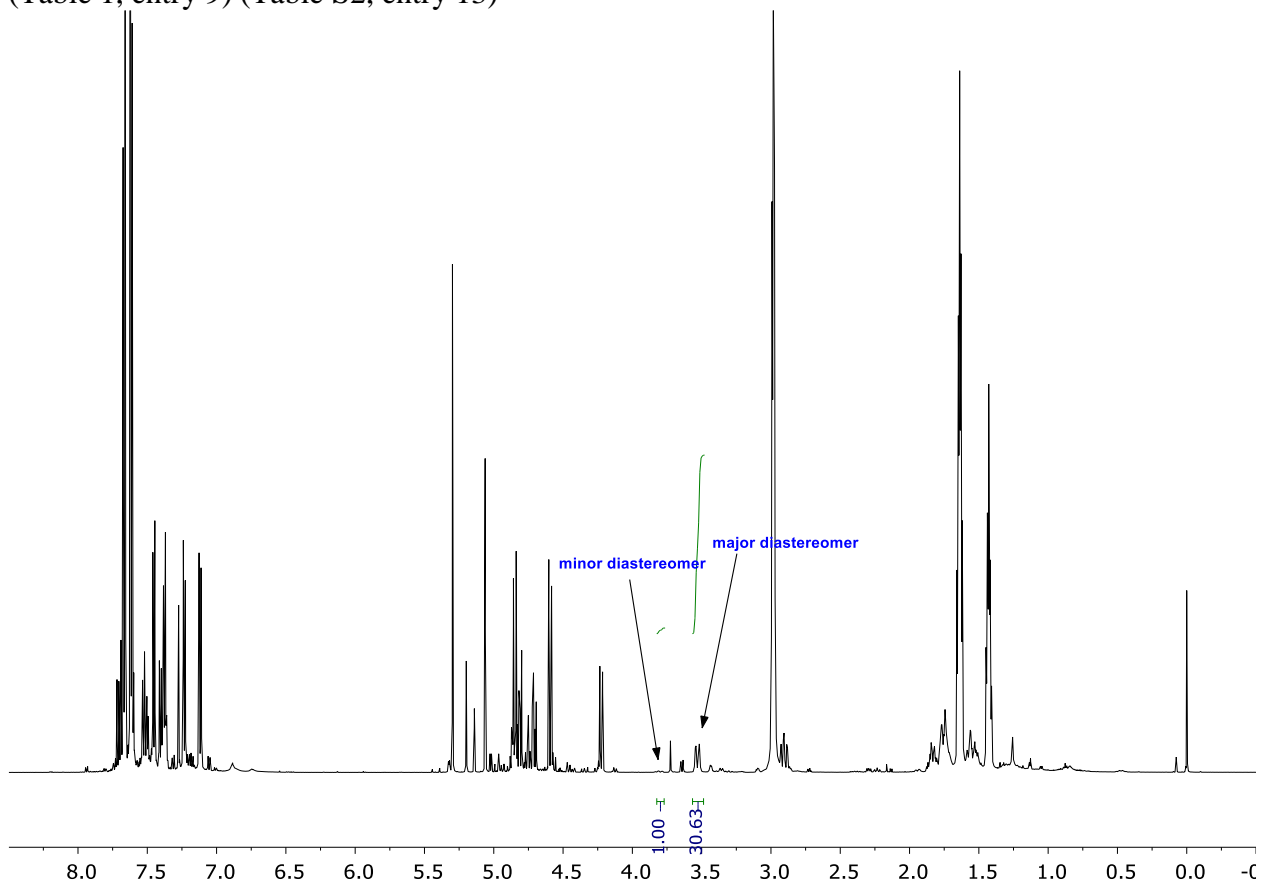

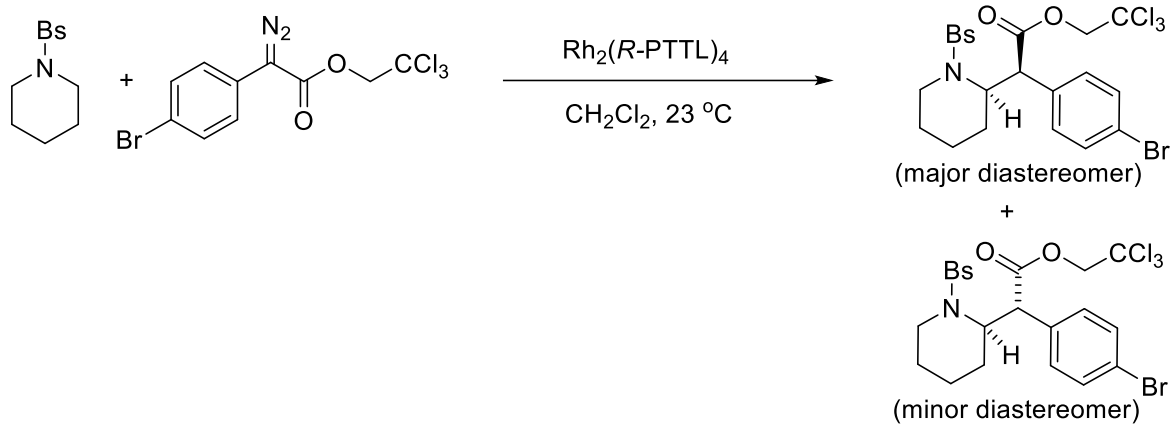

(Table S2, entry 14)

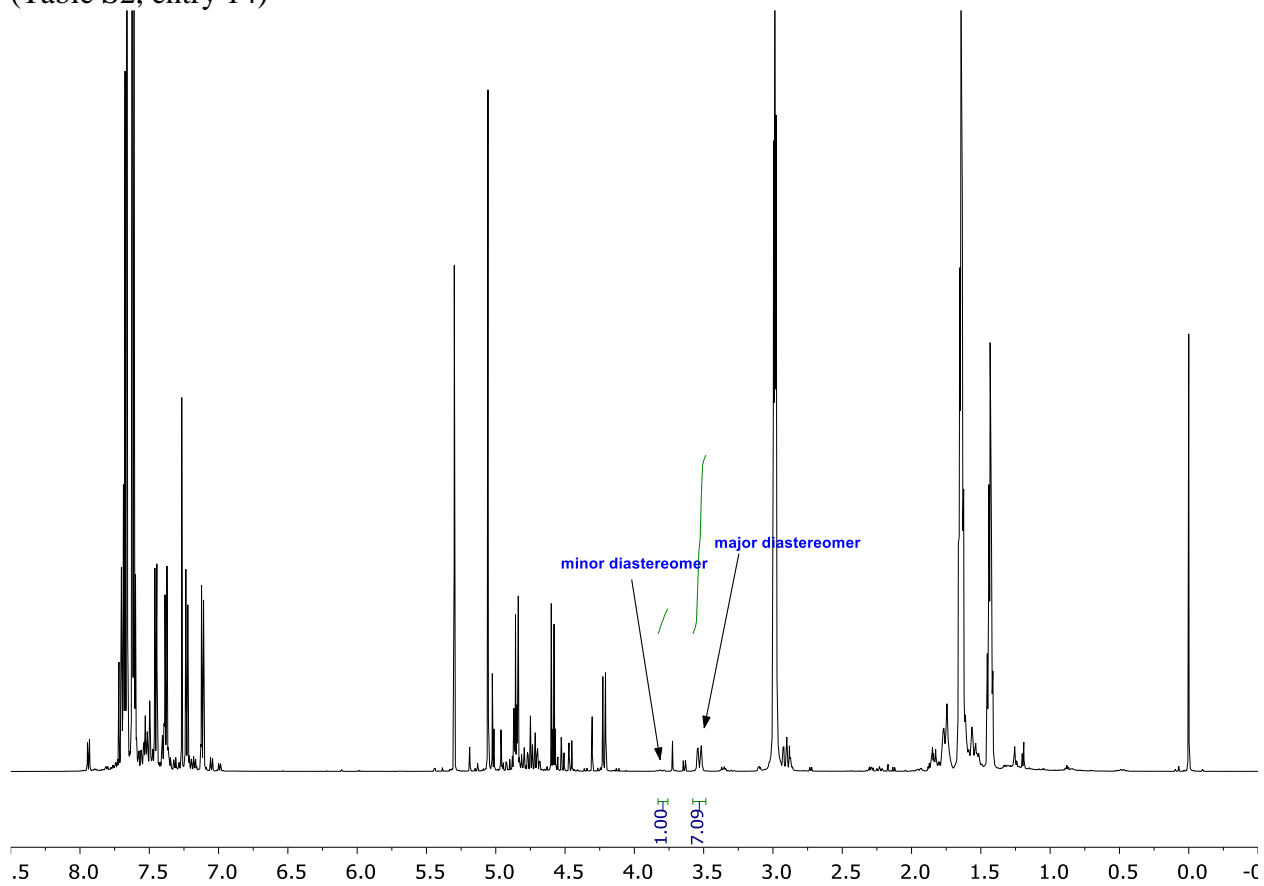

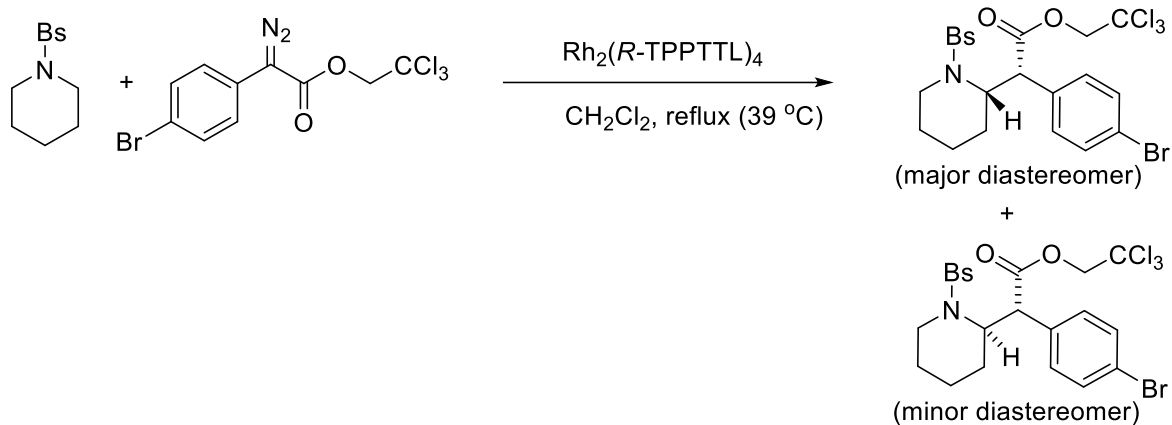

(Table 1, entry 10) (Table S2, entry 15)

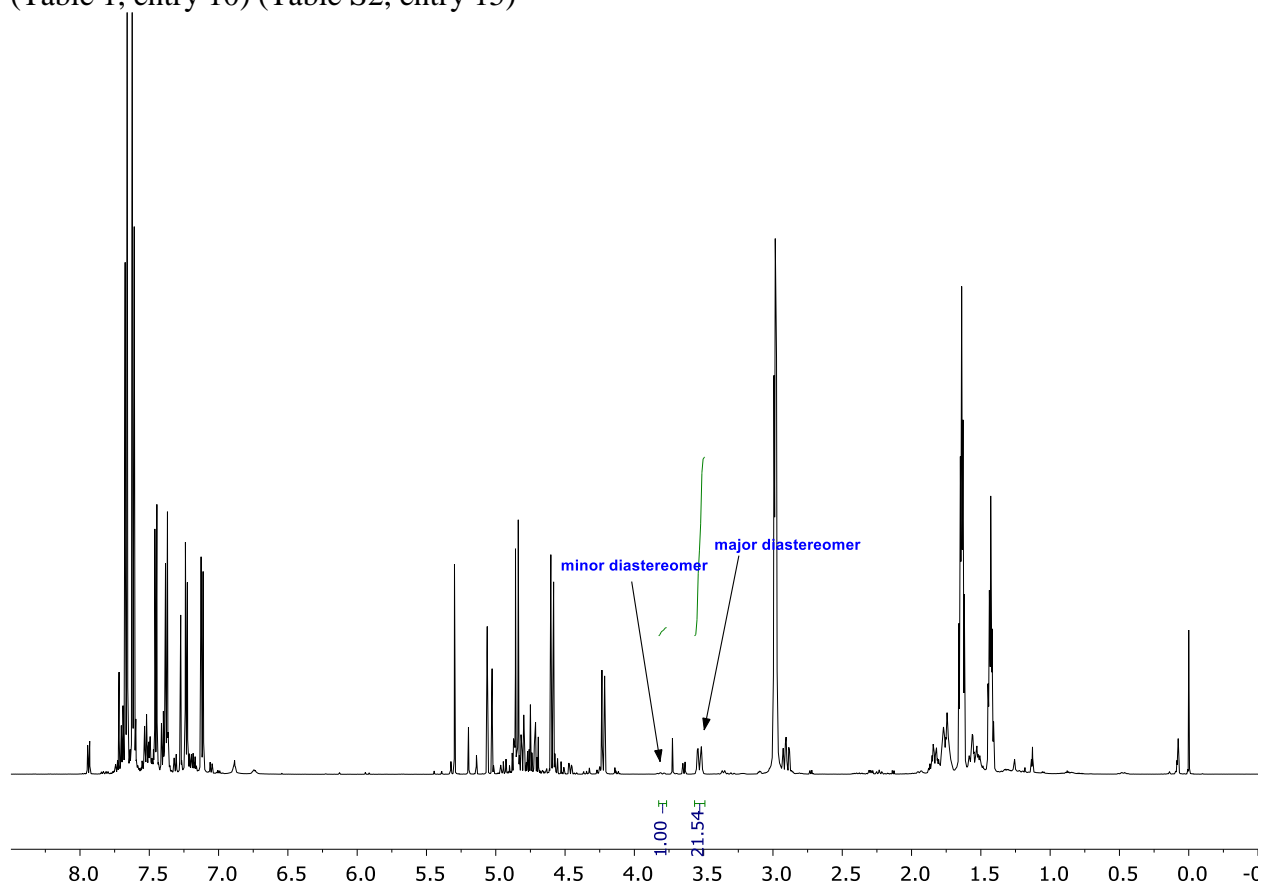

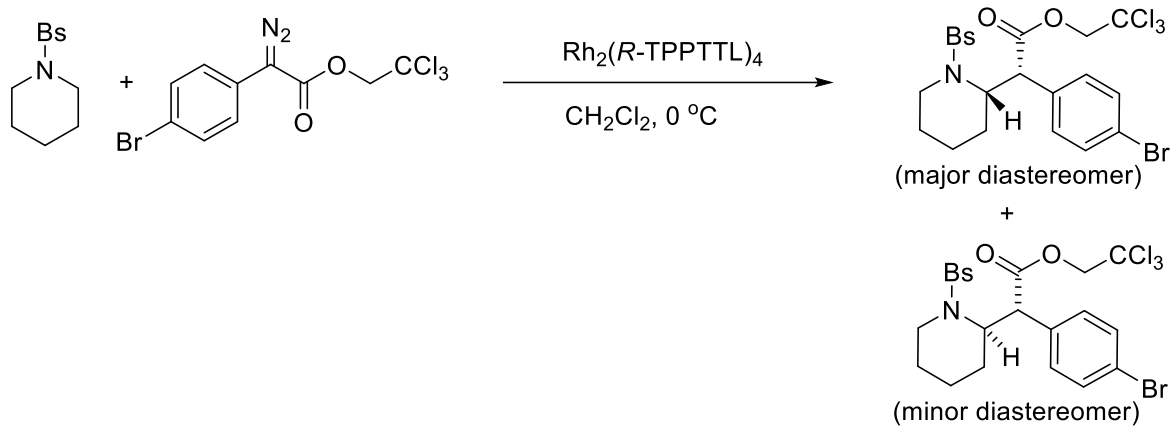

(Table 1, entry 11) (Table S2, entry 16)

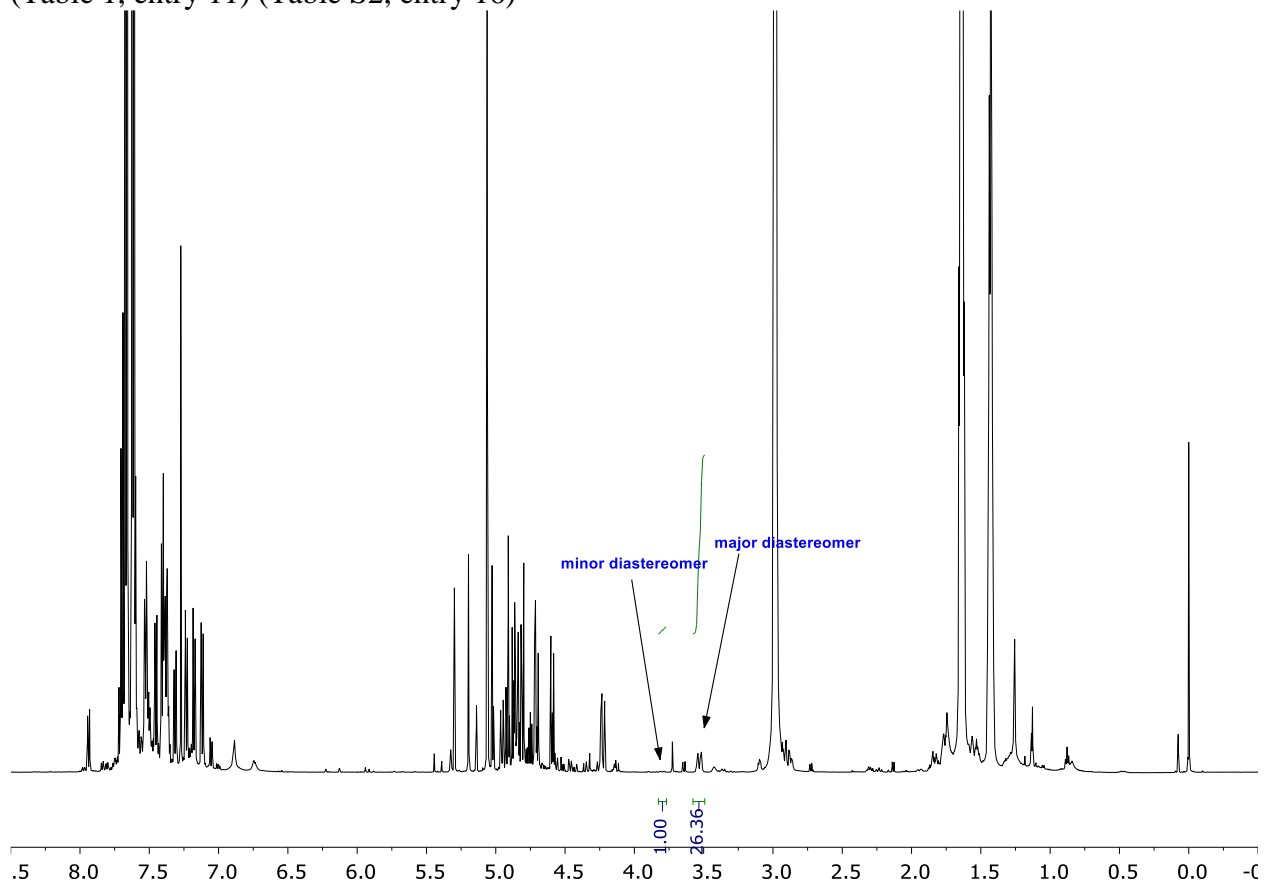

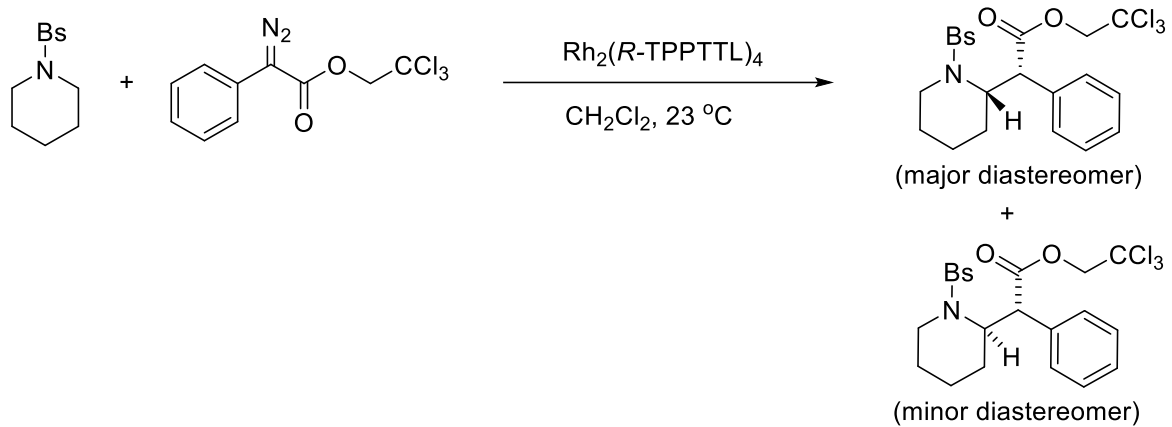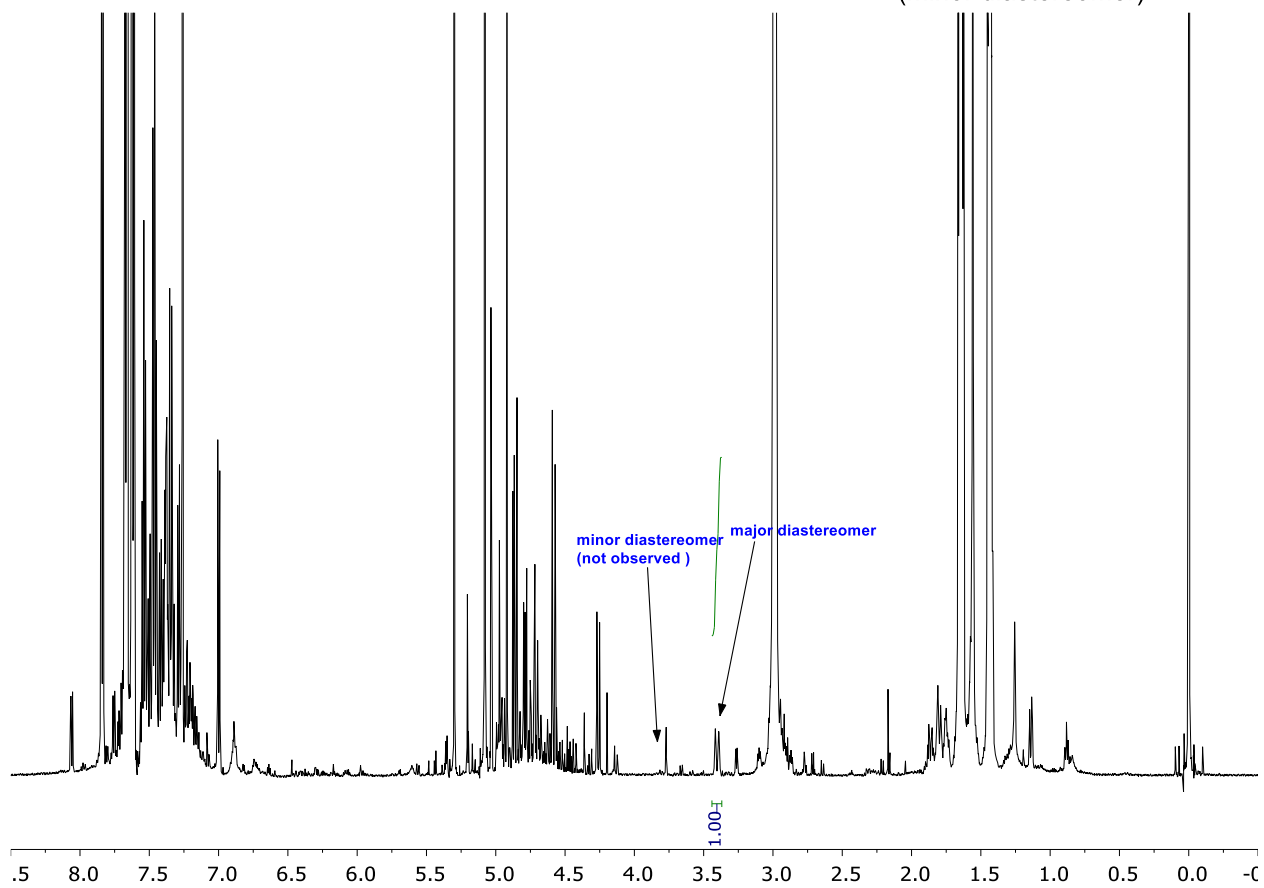

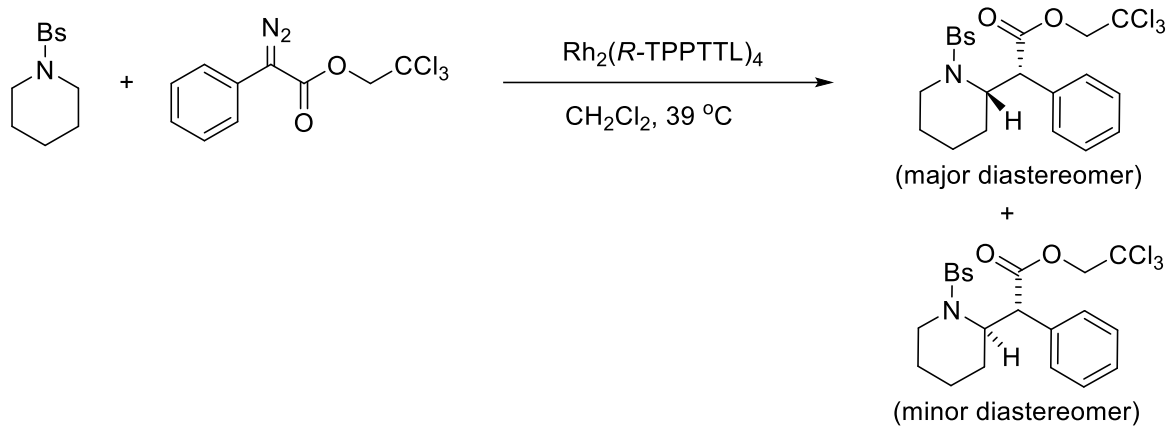

(Scheme 2, **6b**)

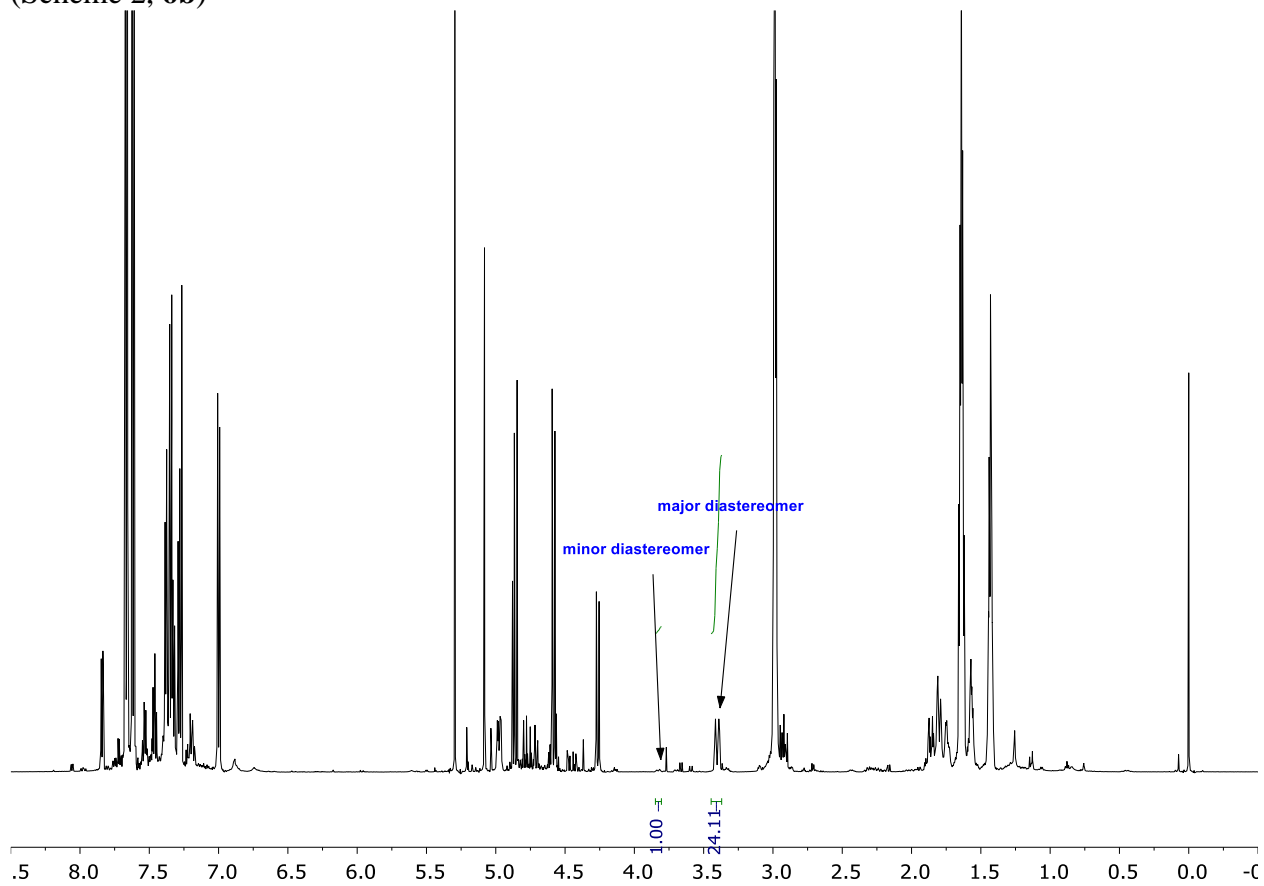

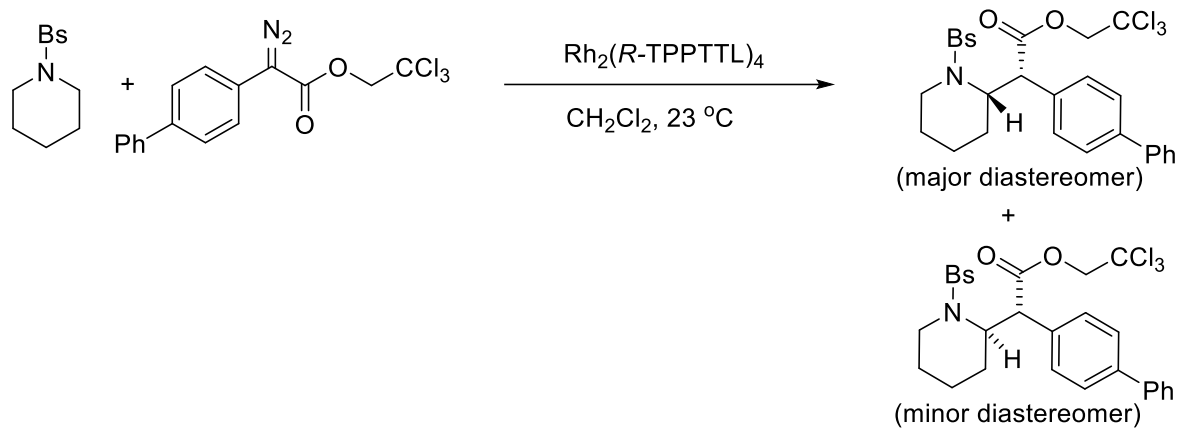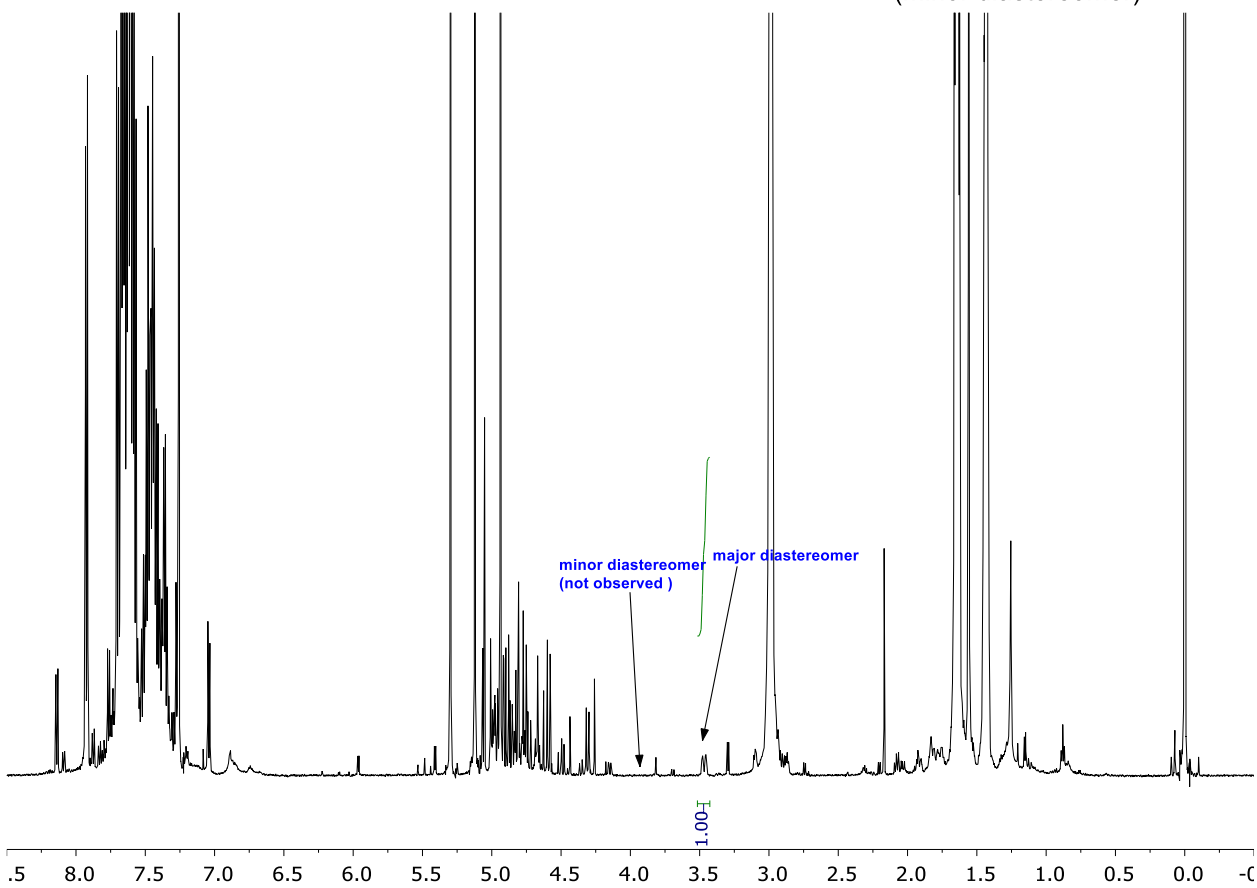

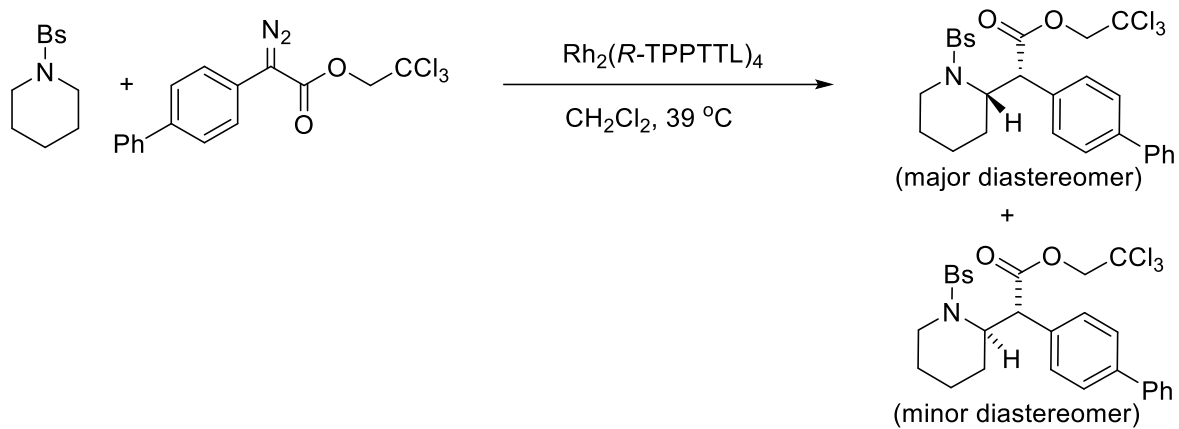

(Scheme 2, **6c**)

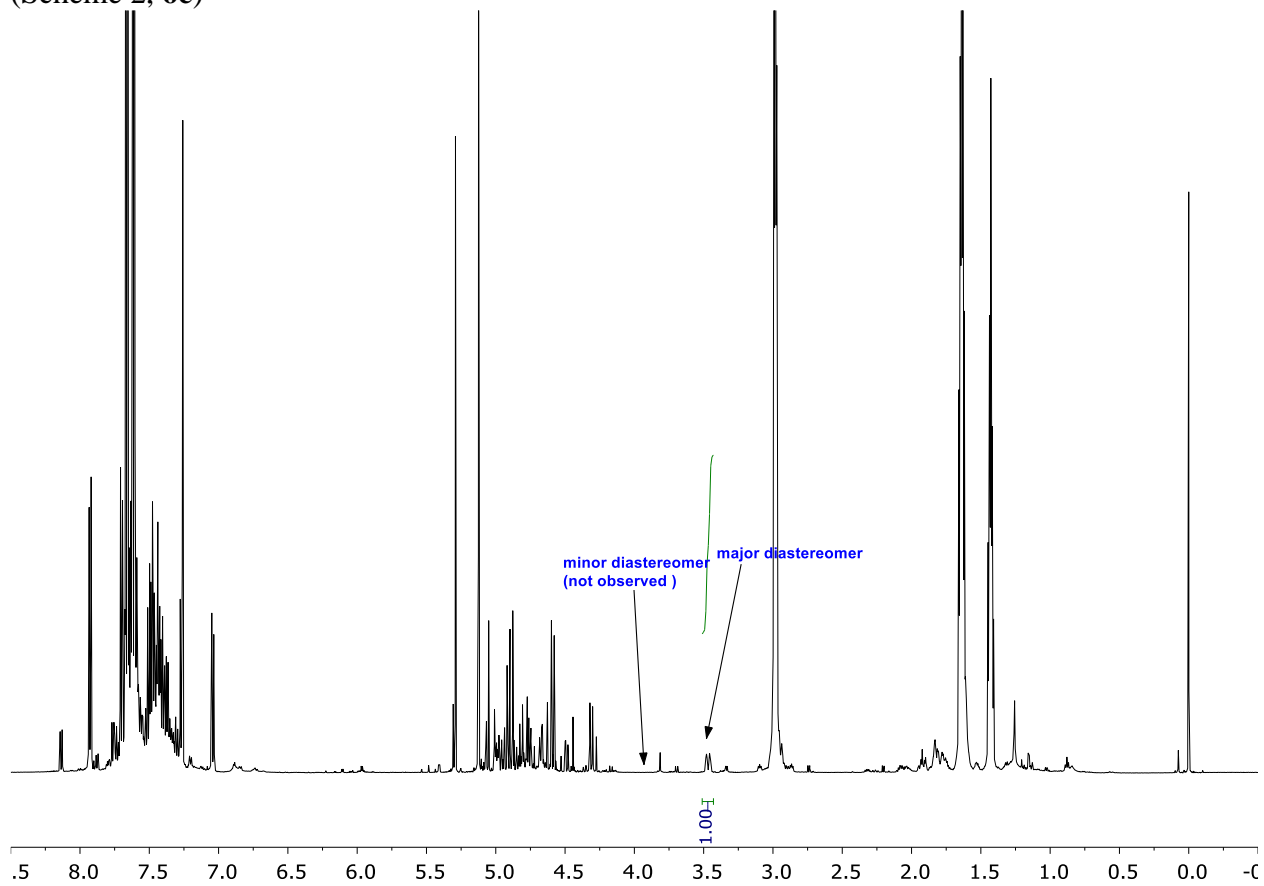



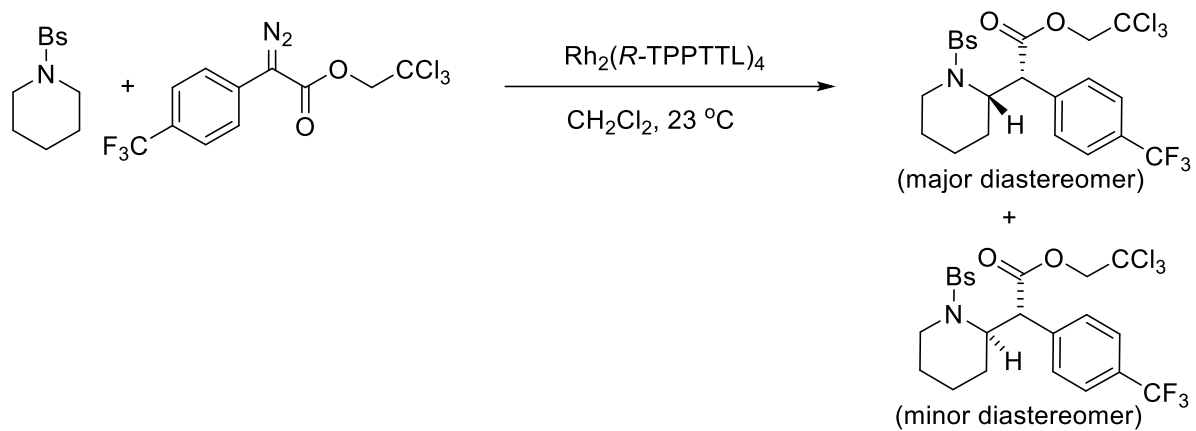

(Scheme 2, **6d**)

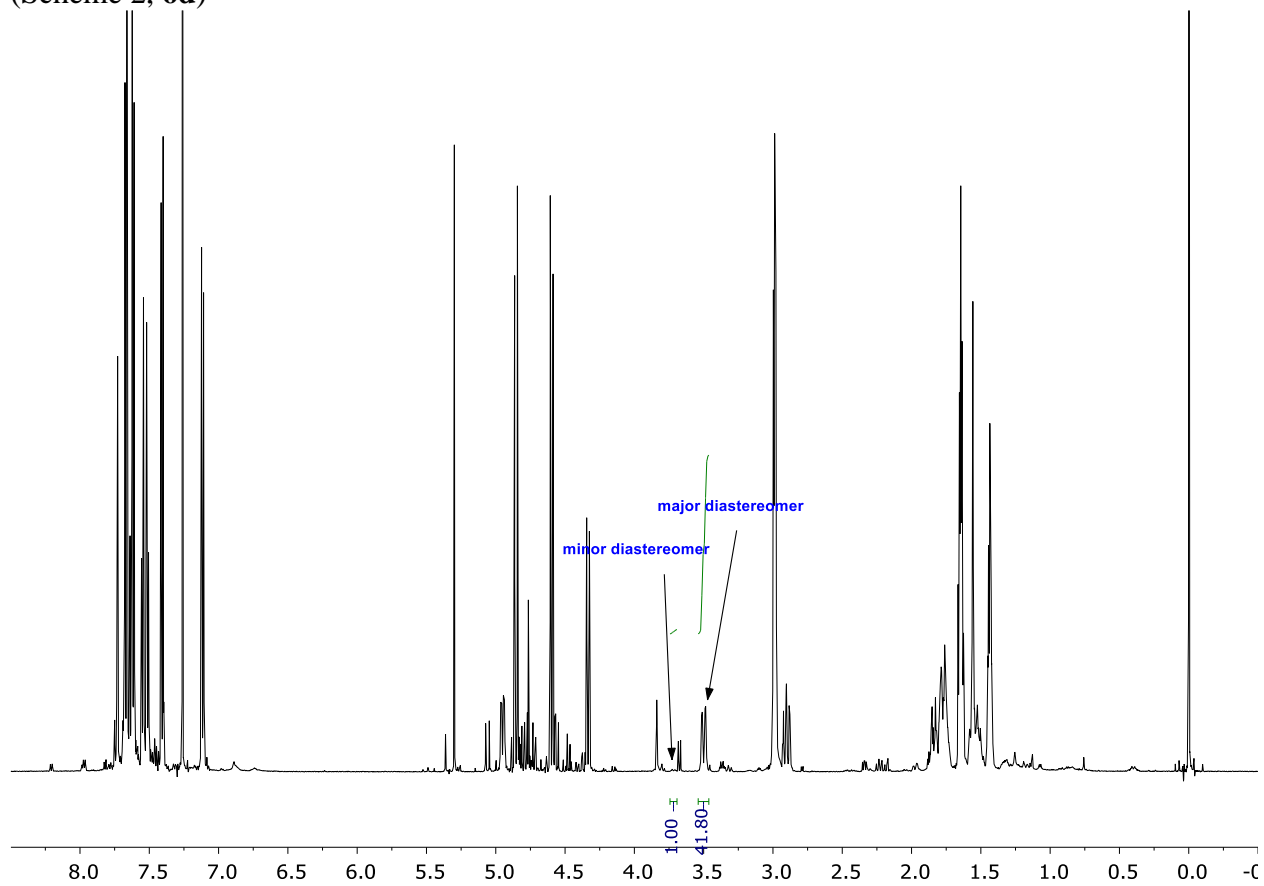

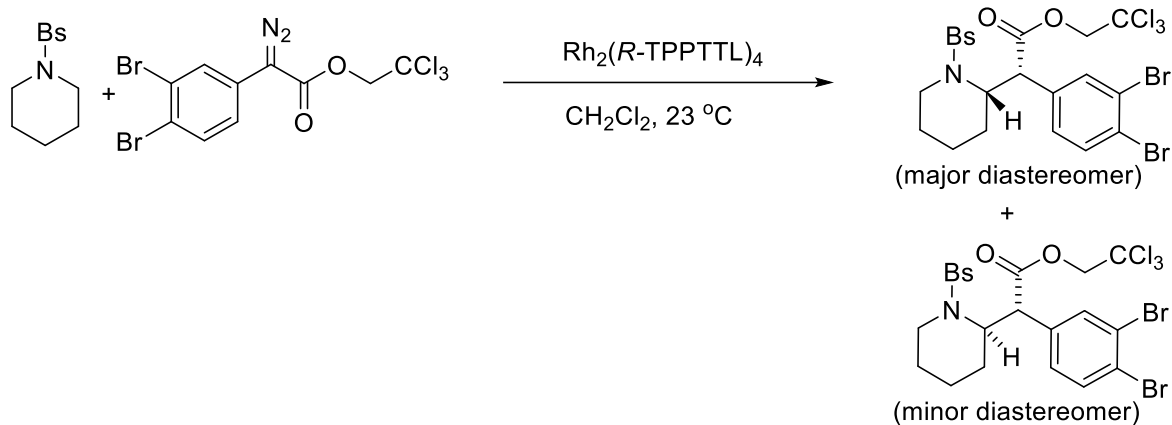

(Scheme 2, **6e**)

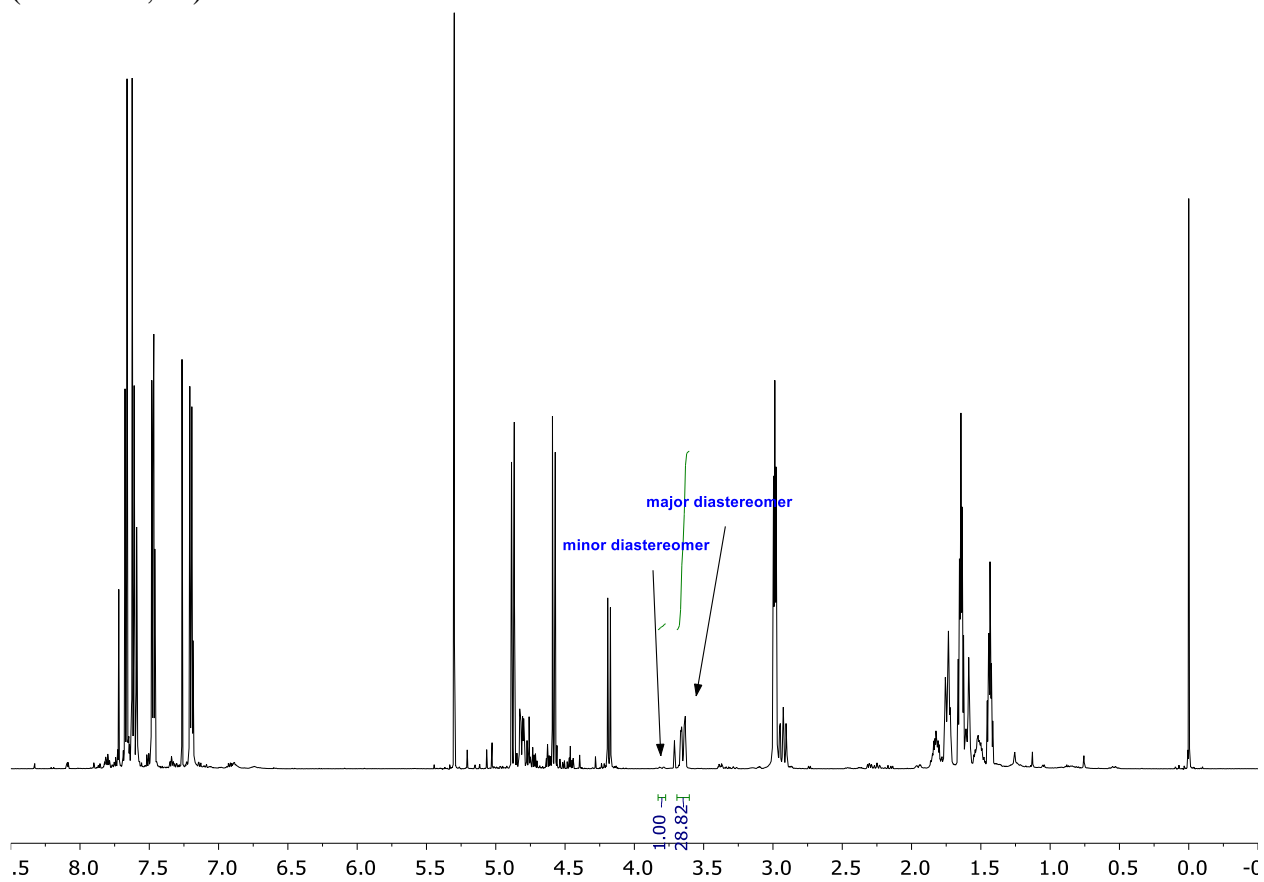

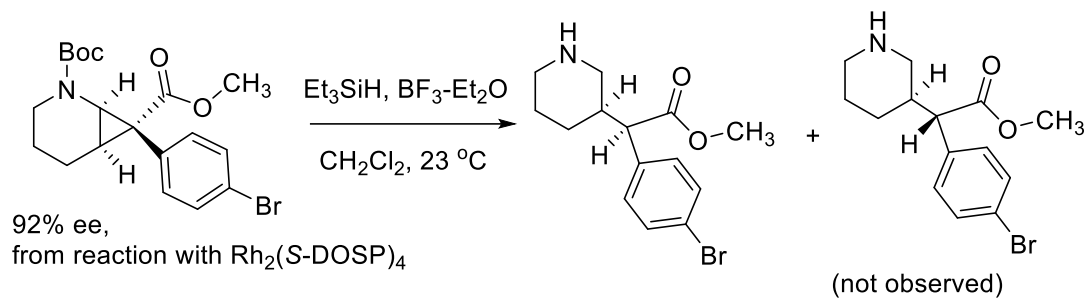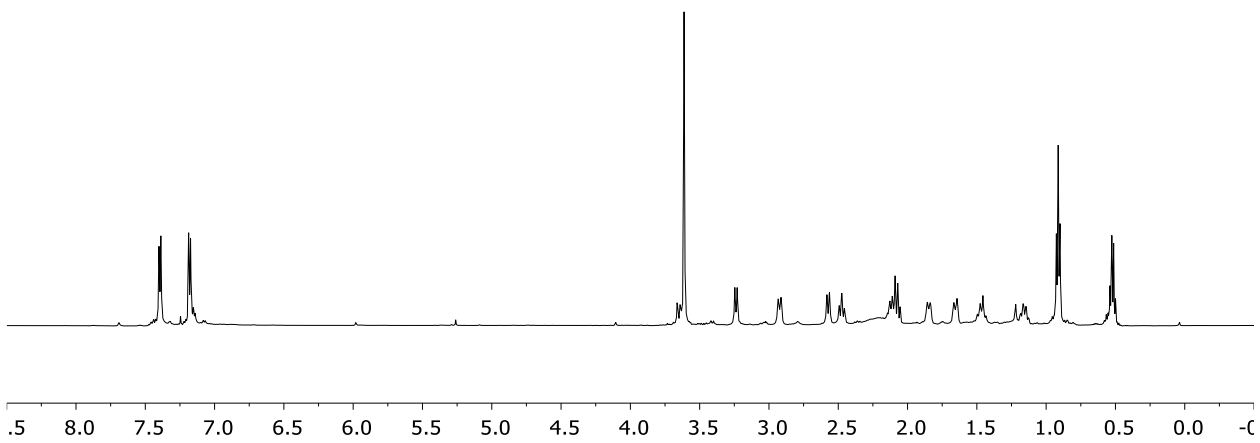

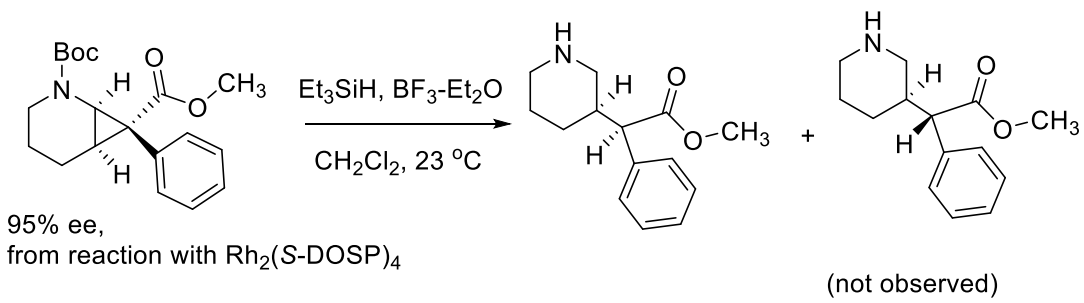

(Table 3, **9b**)

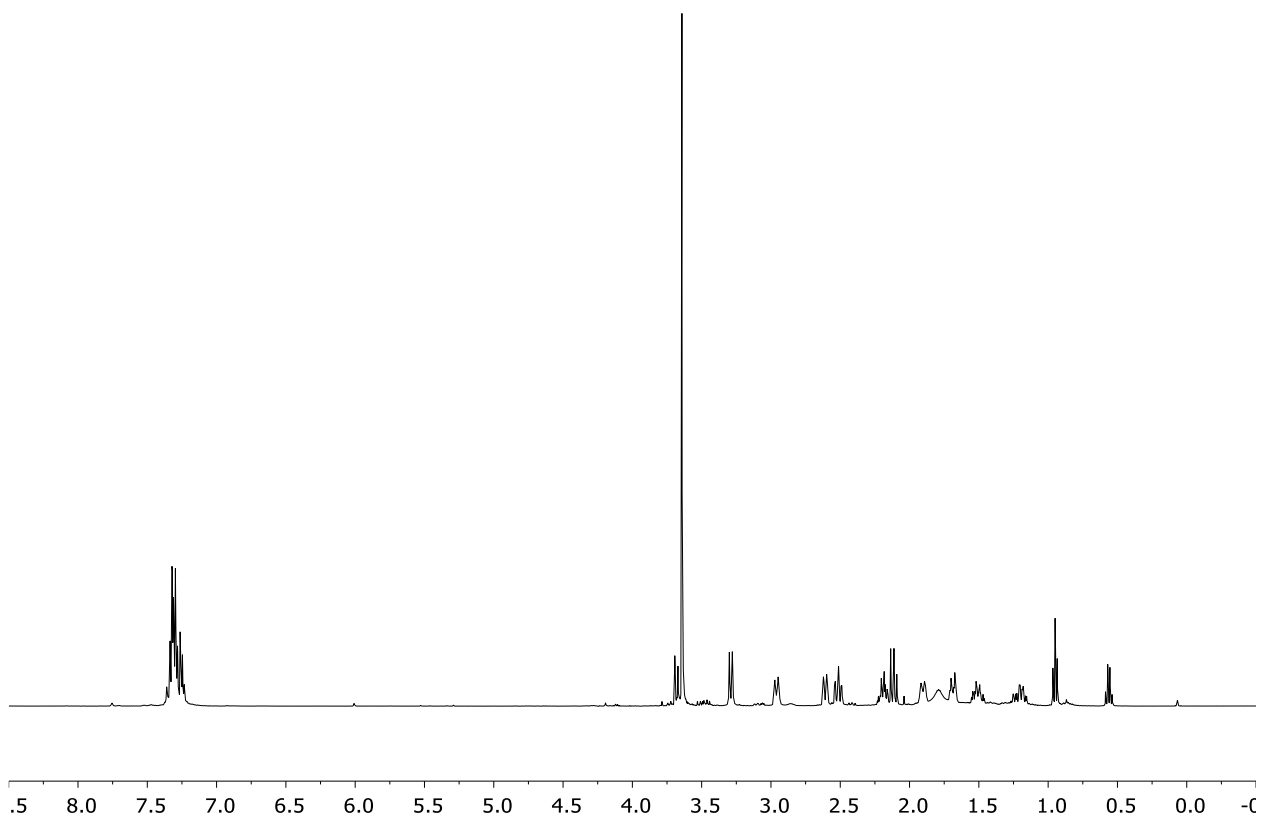

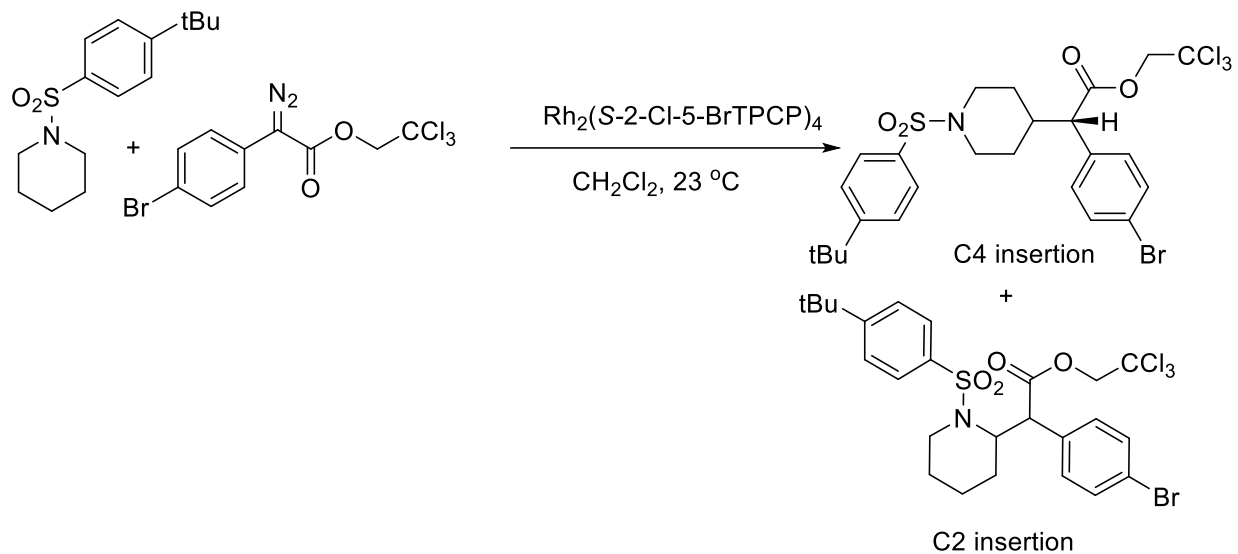

(Table S5, entry 7)

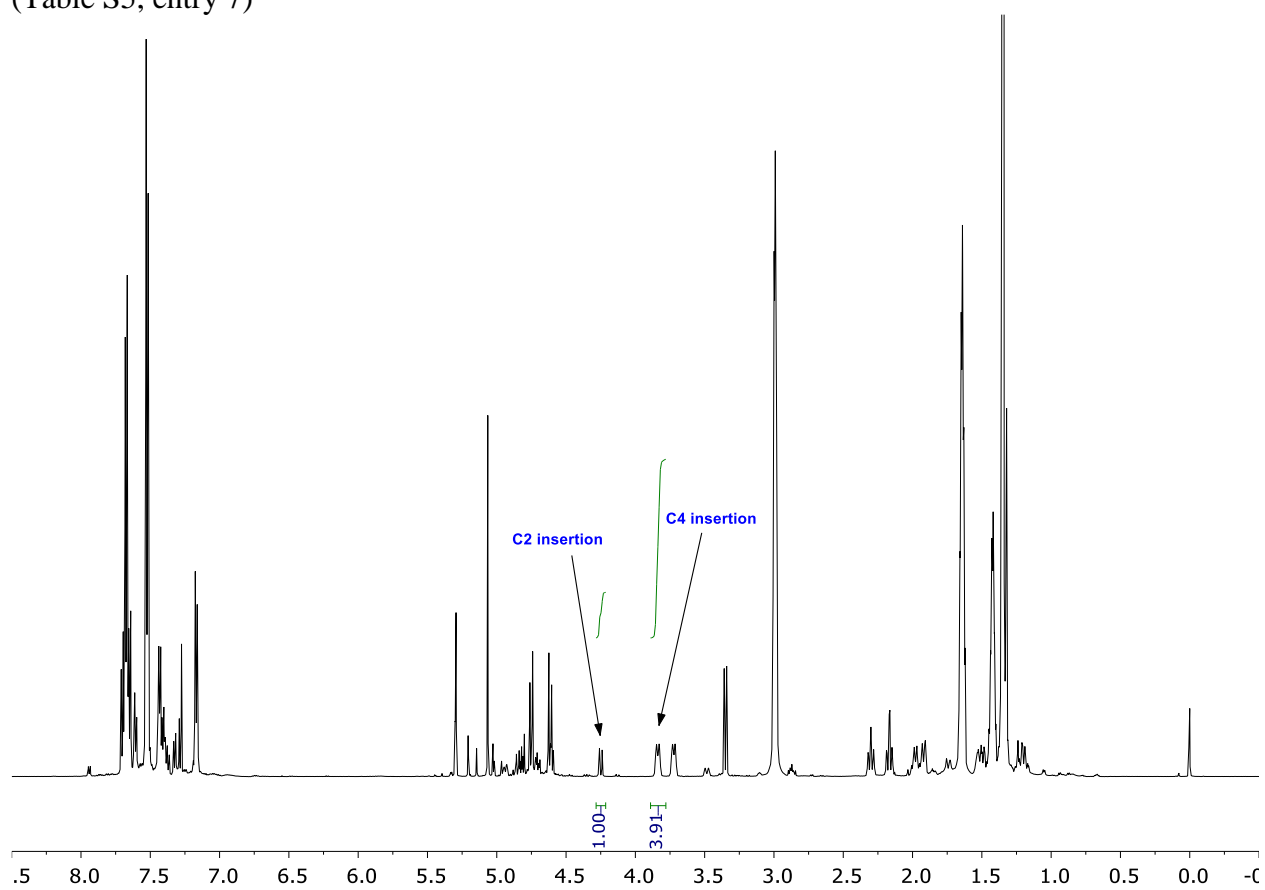

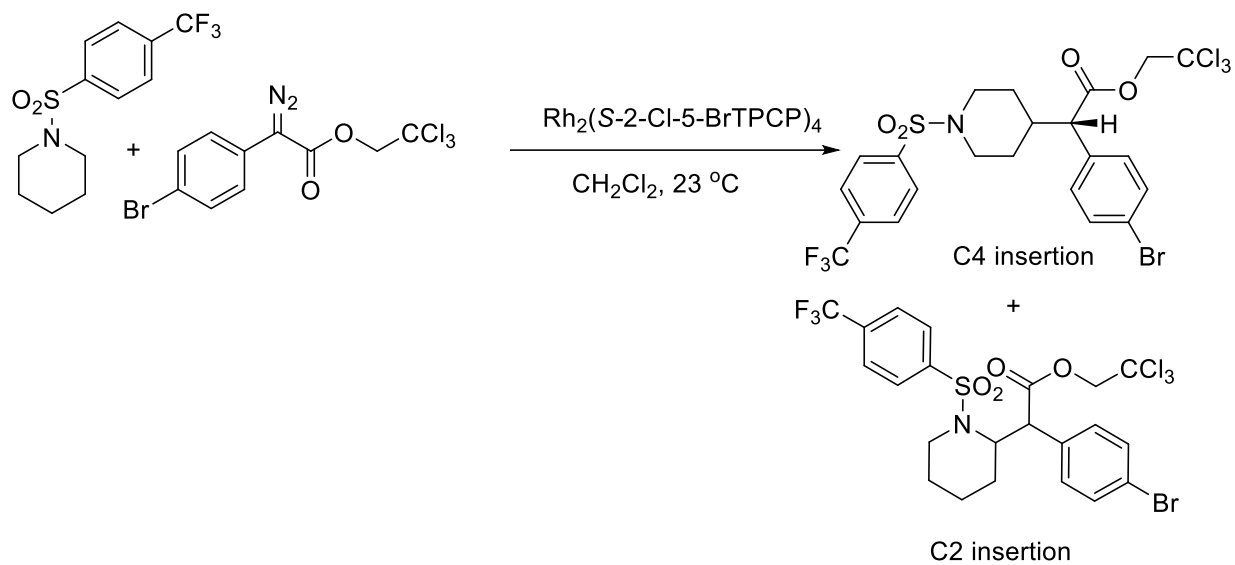

(Table 4, entry 6) (Table S5, entry 8)

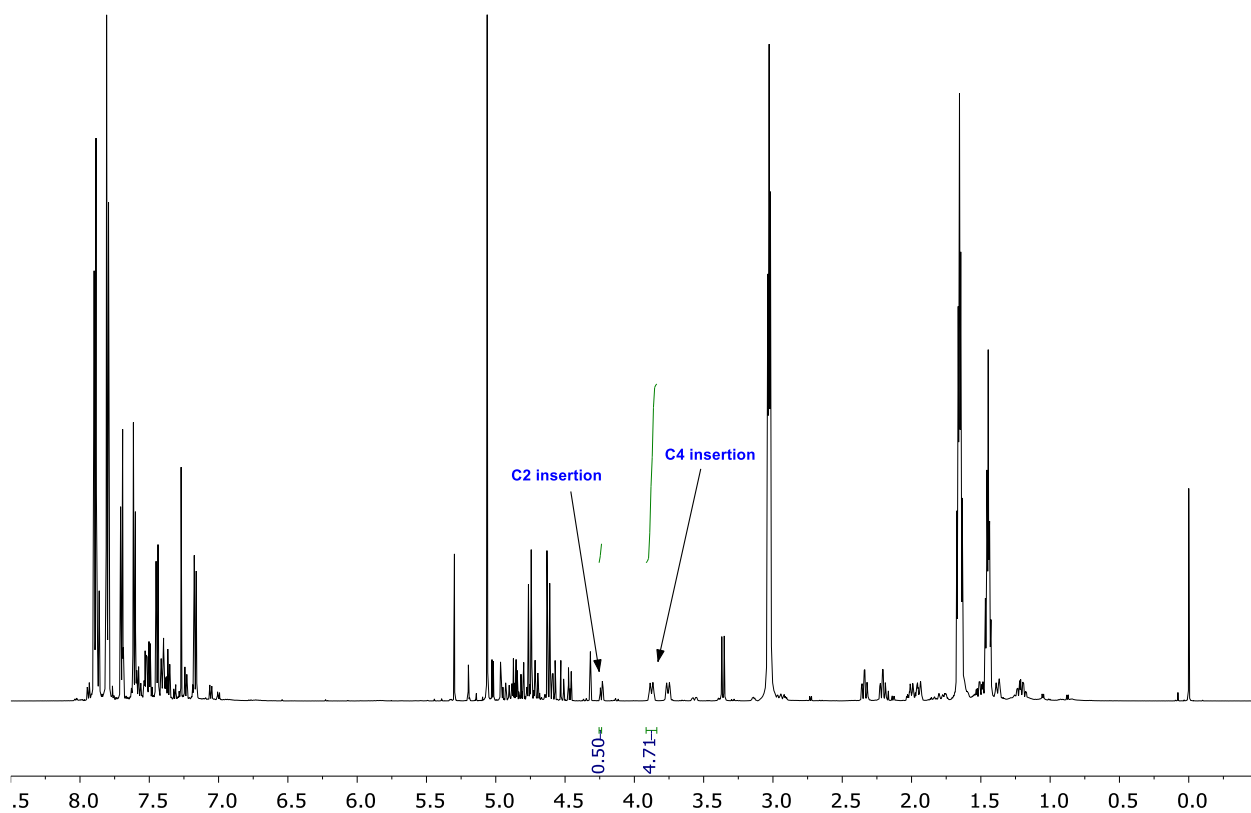

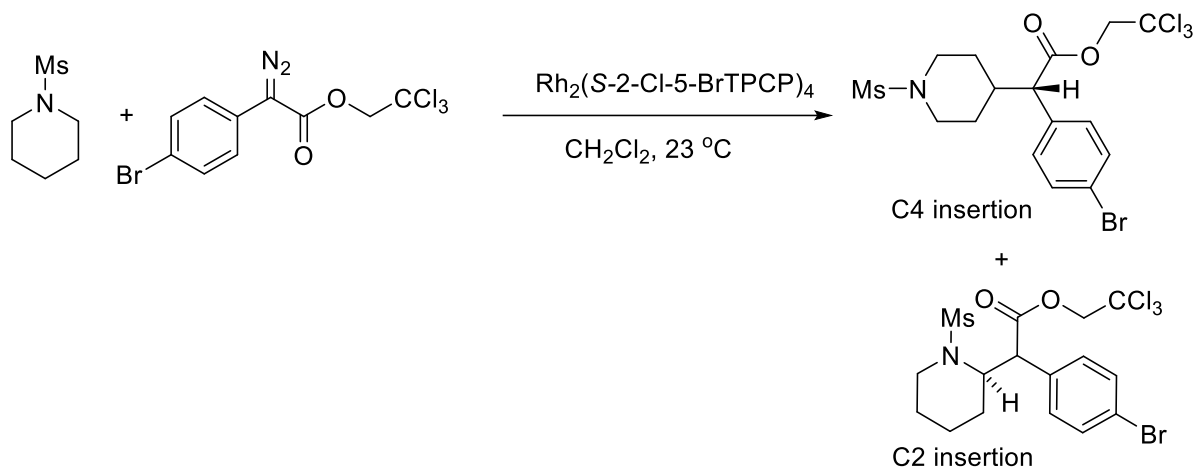

(Table 4, entry 7) (Table S5, entry 10)

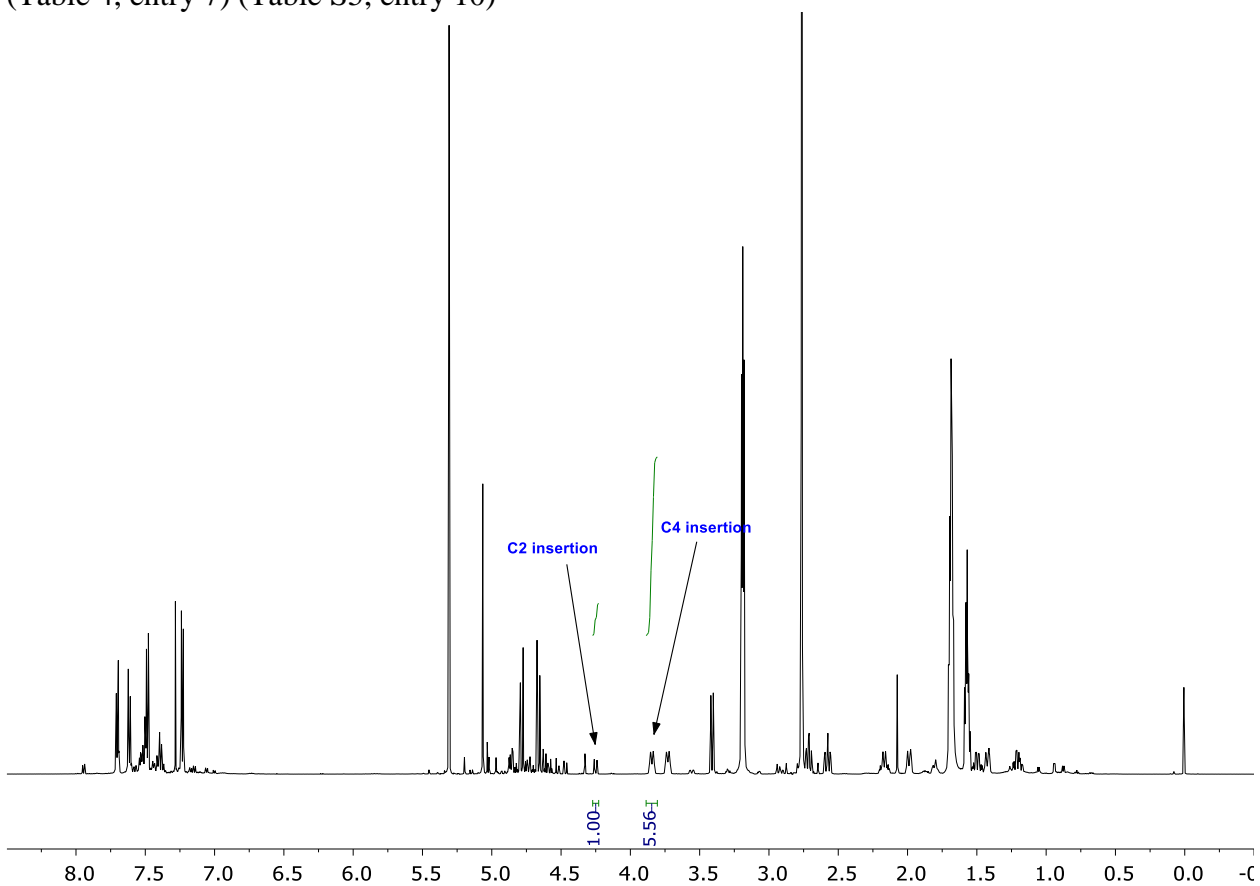

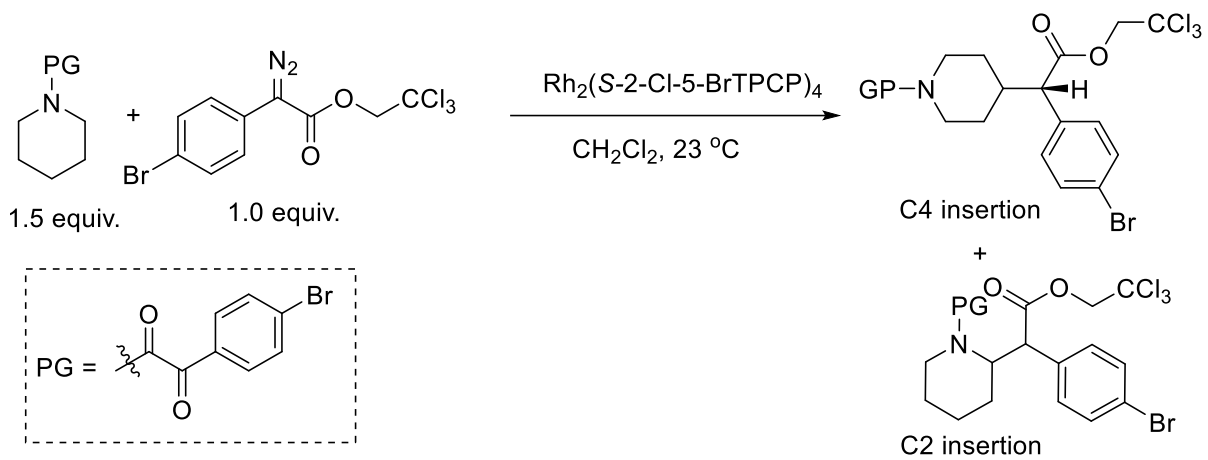

(Table 4, entry 8) (Table S5, entry 11)

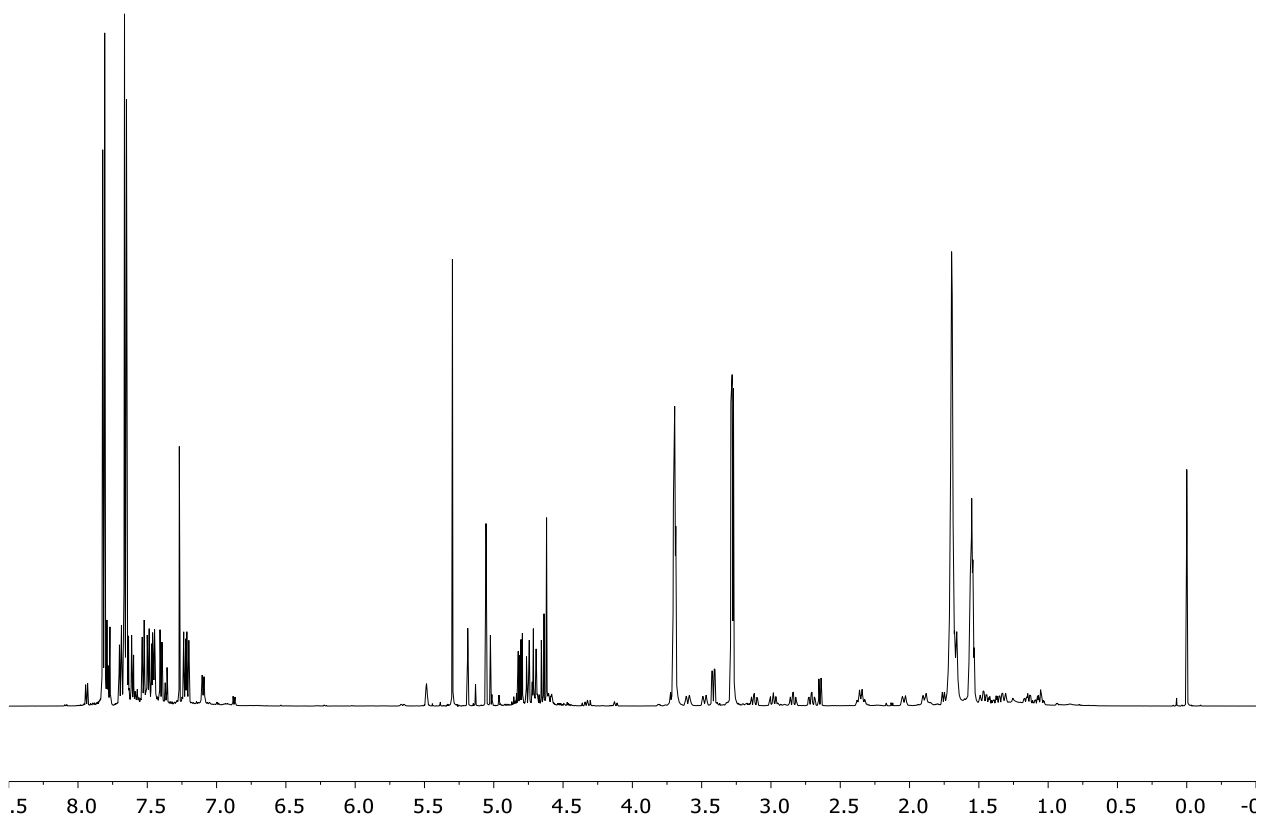



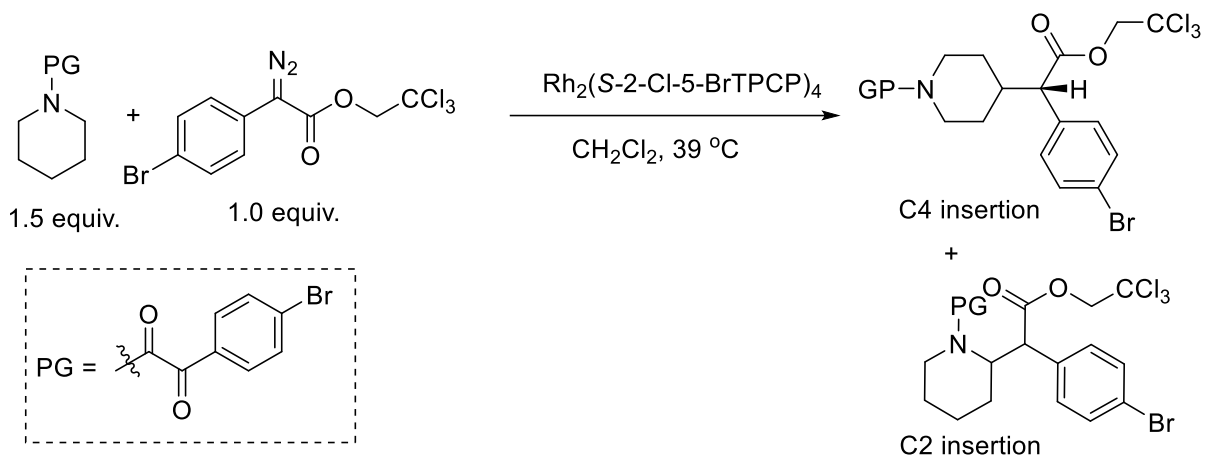

(Table 4, entry 9) (Table S5, entry 12)

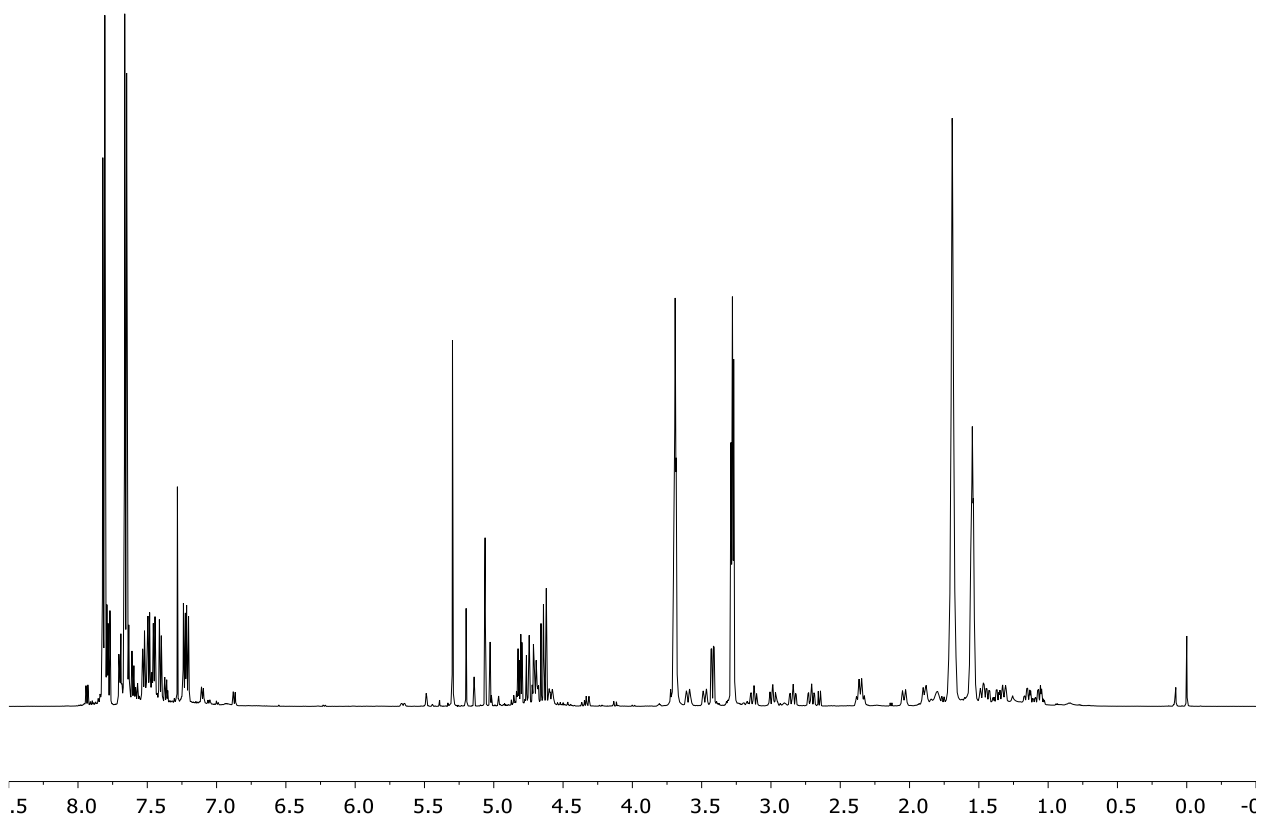

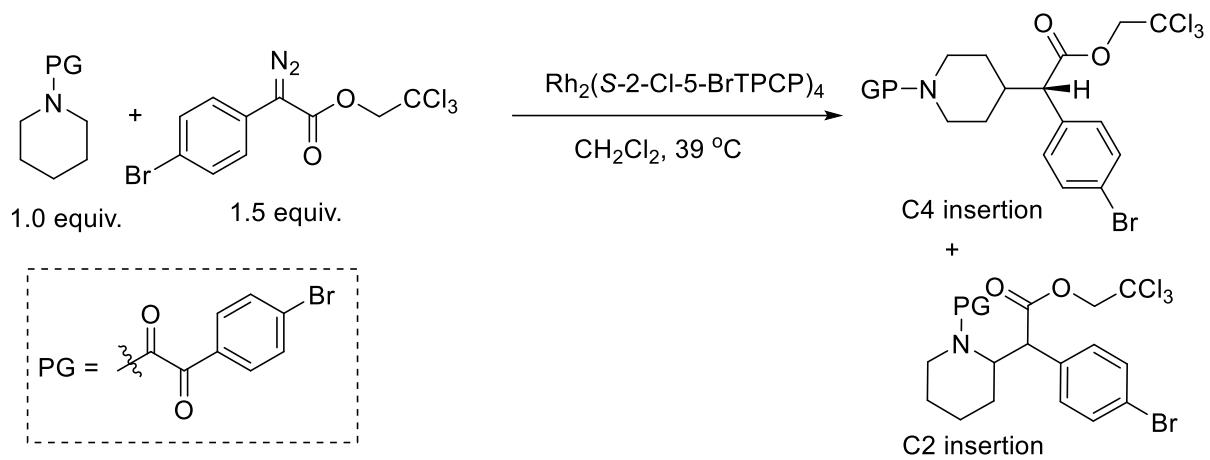

(Table 4, entry 10) (Table S5, entry 13)

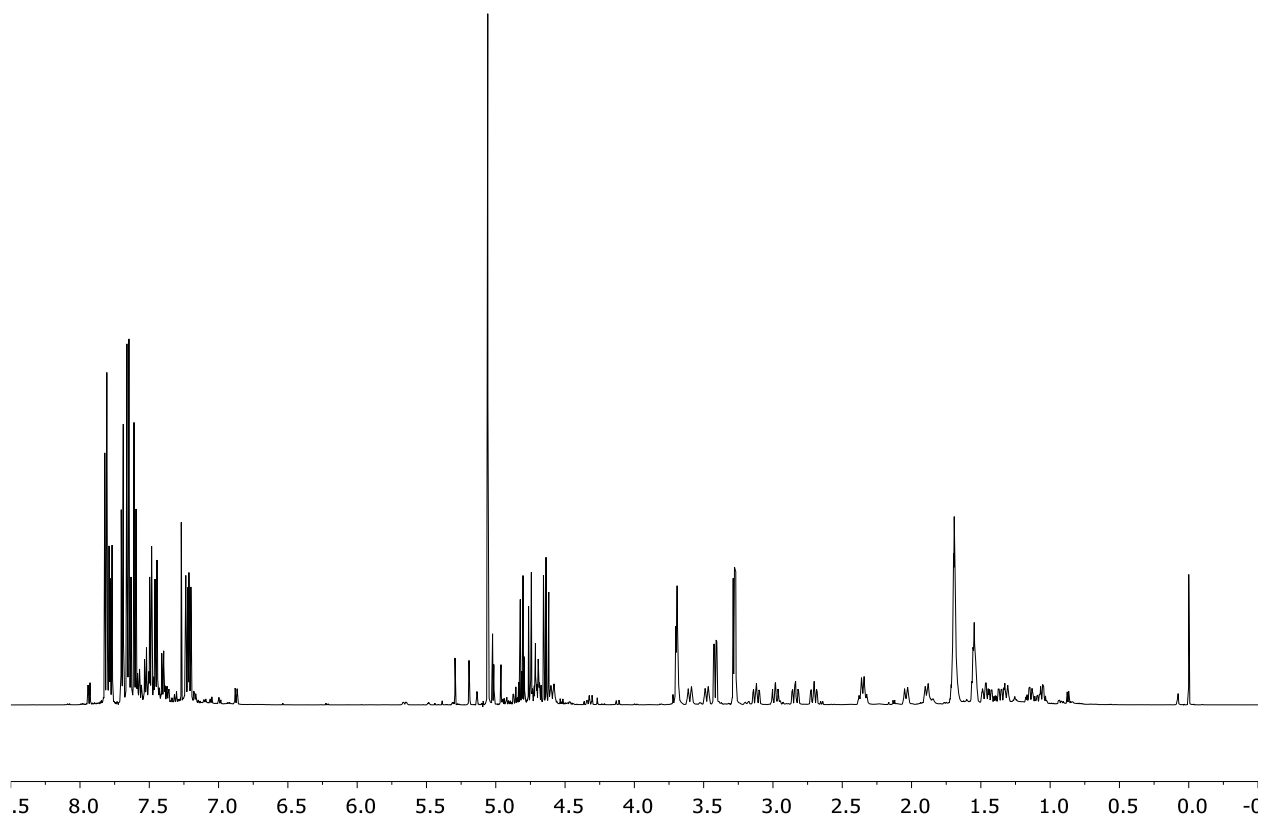

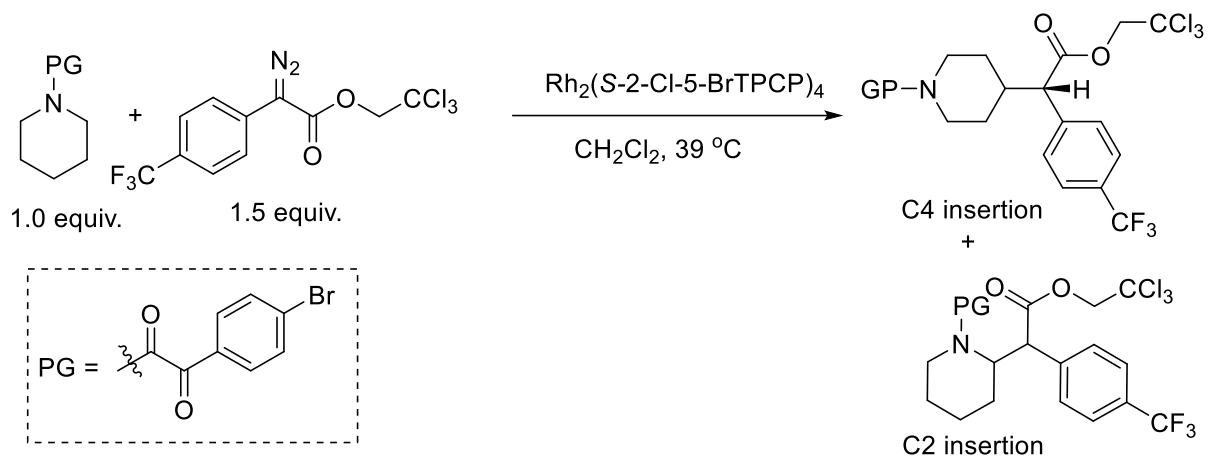

(Scheme 4, **13f**)

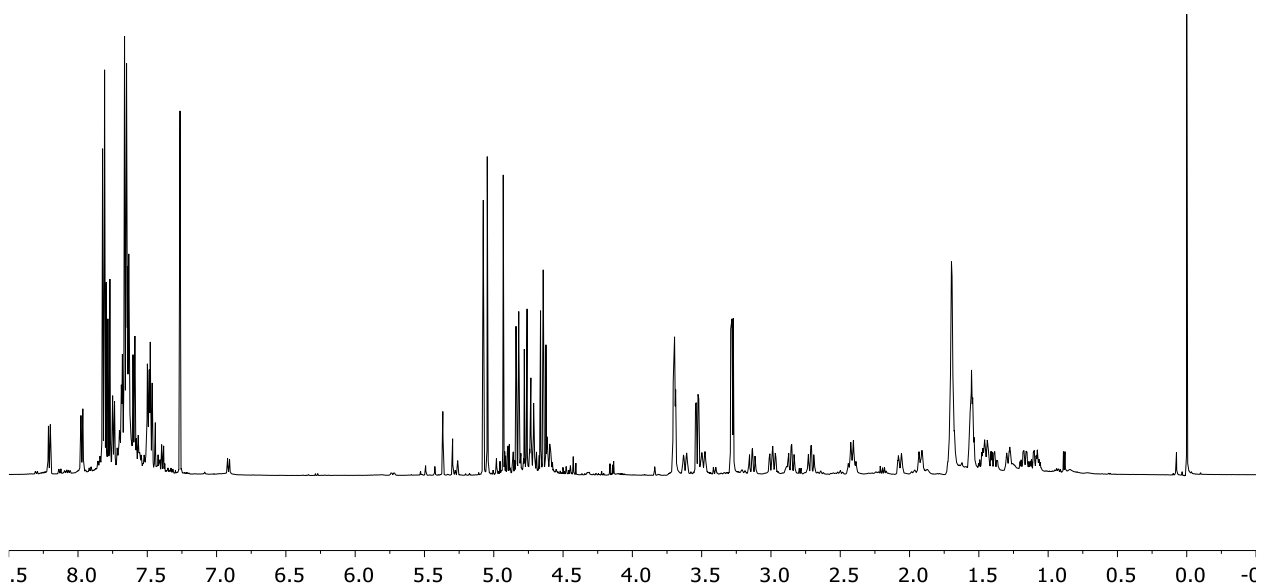

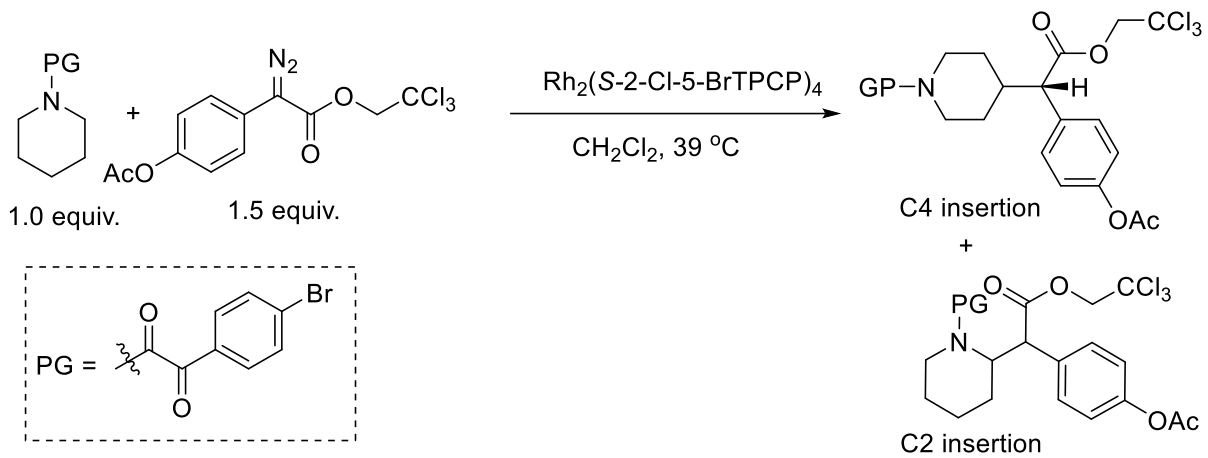

(Scheme 4, **13g**)

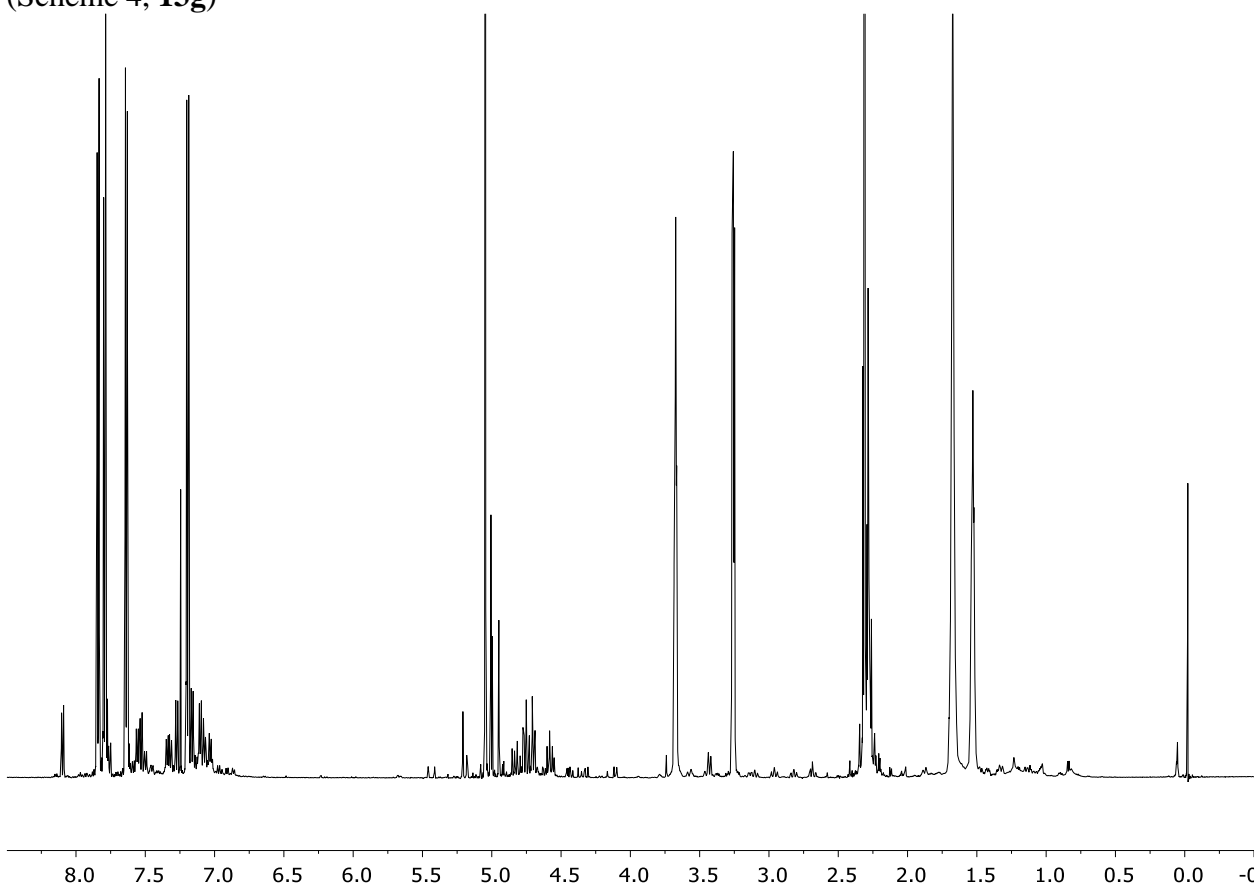

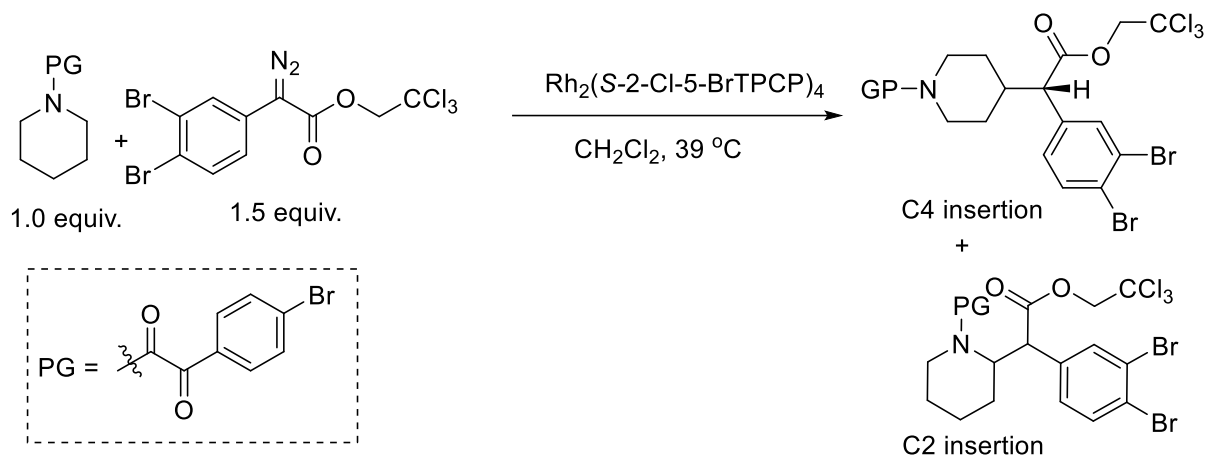

(Scheme 4, **13h**)

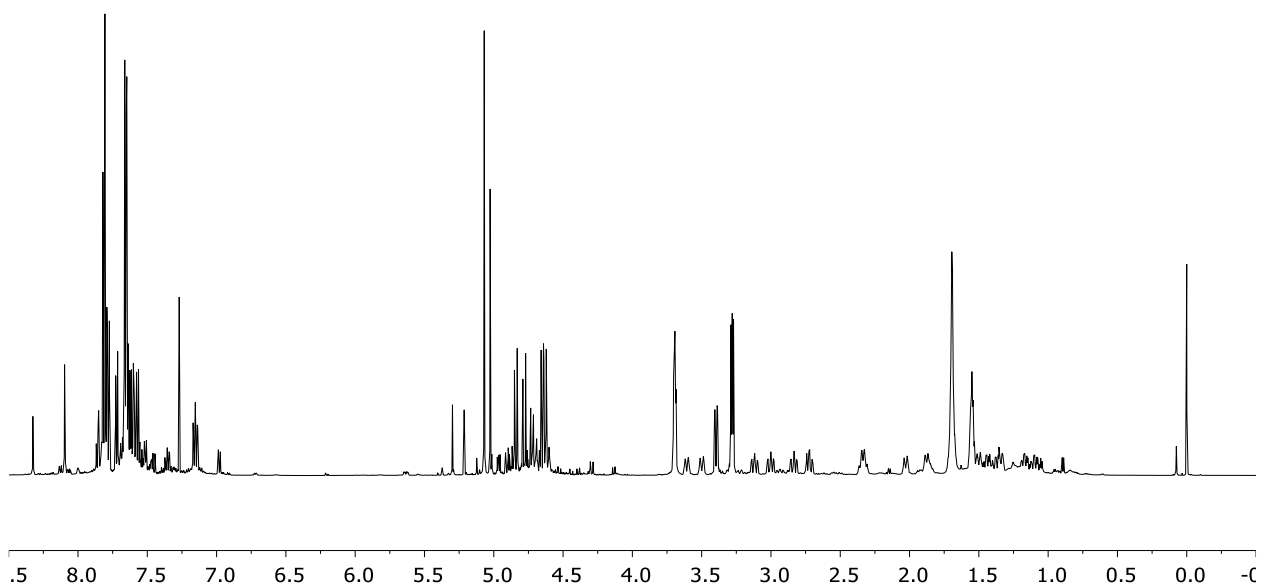

## 8. Characterization NMR Spectra

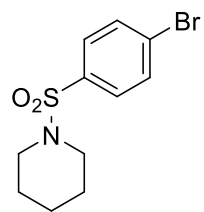

(1b)

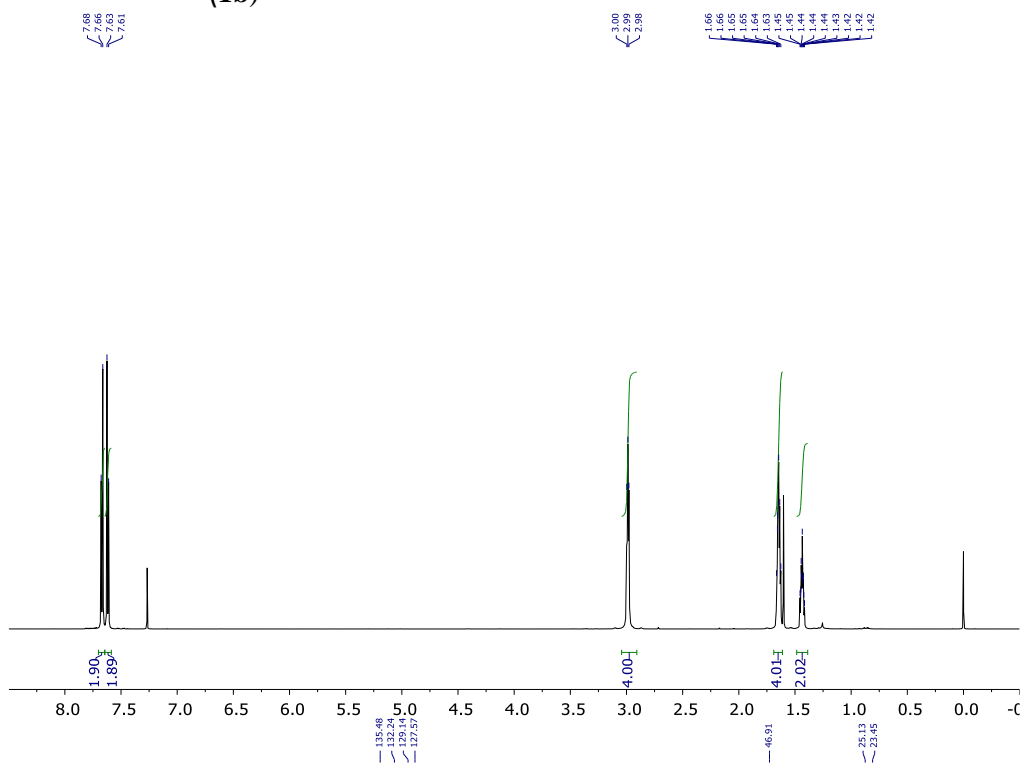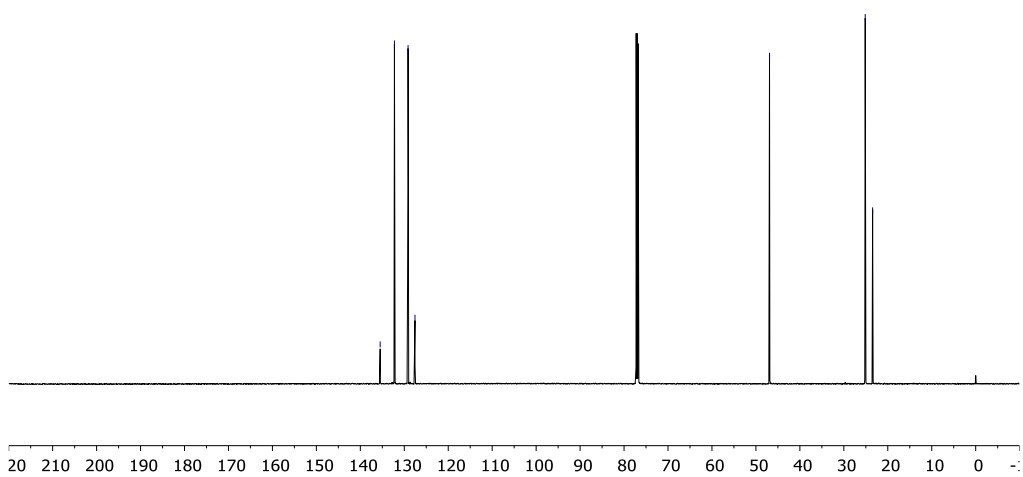

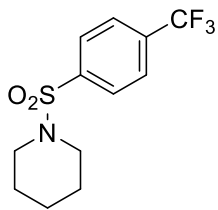

(1d)

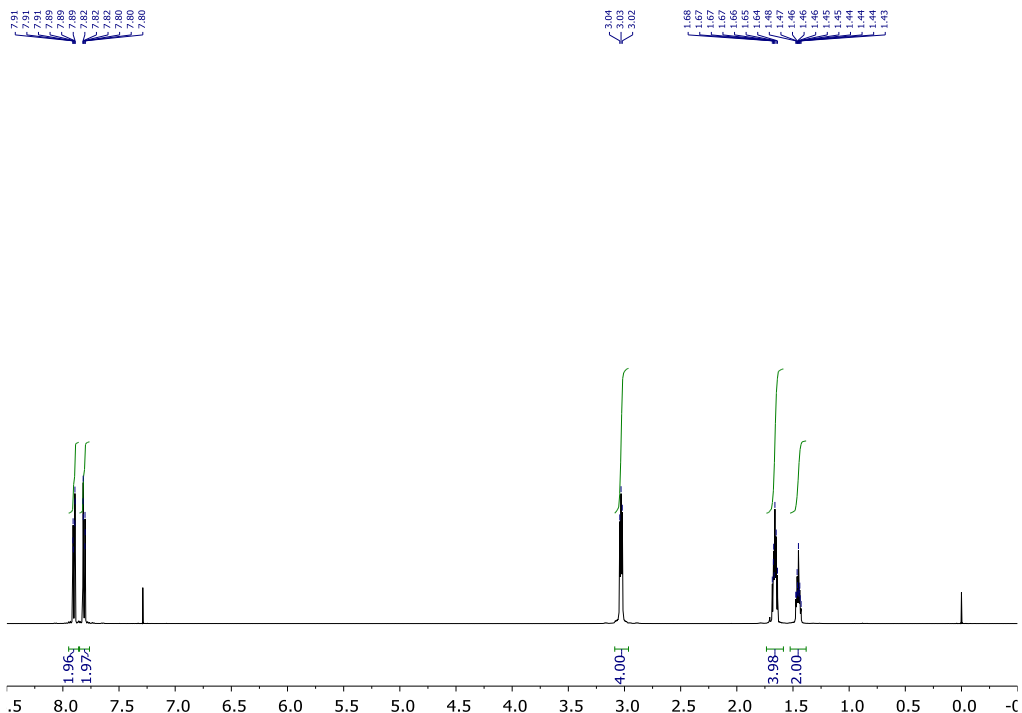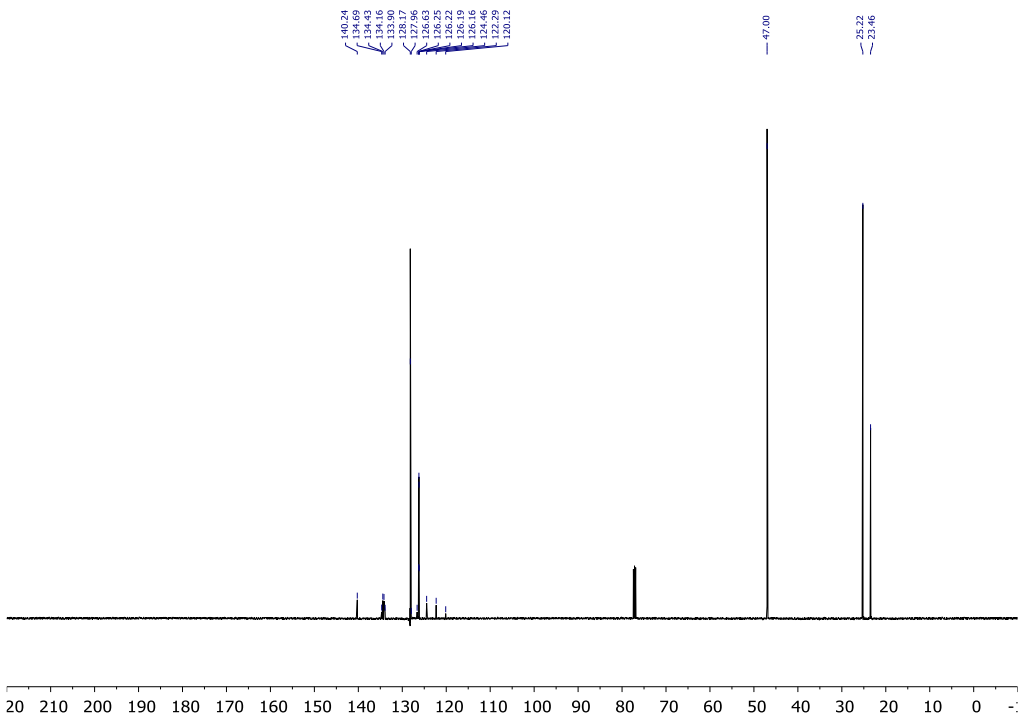

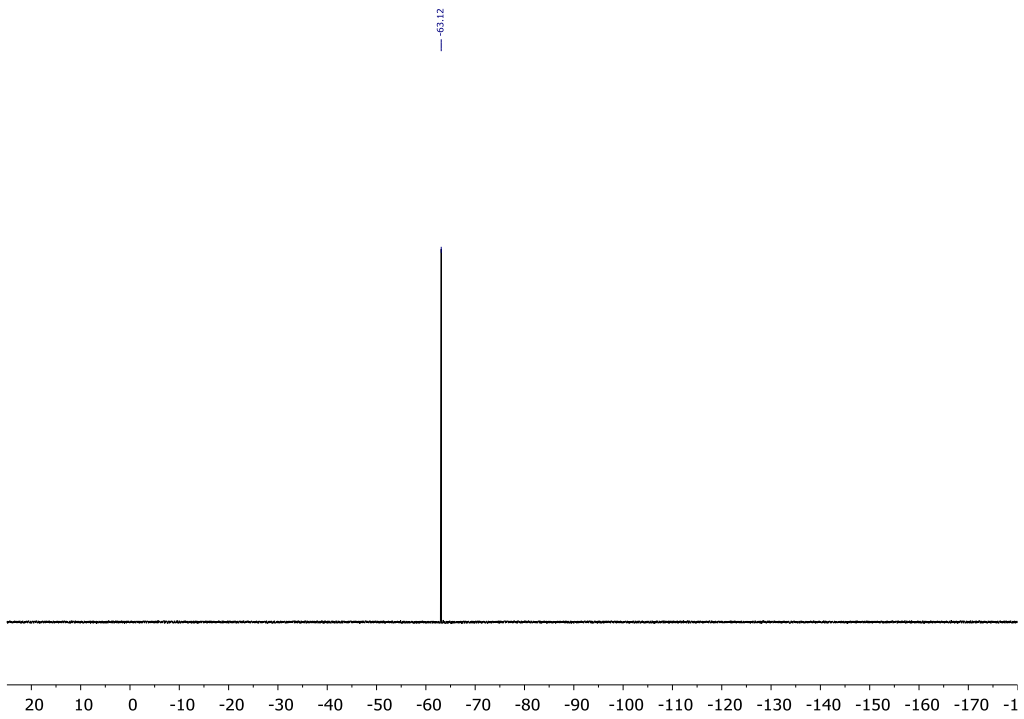



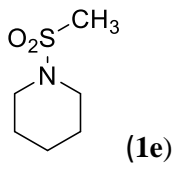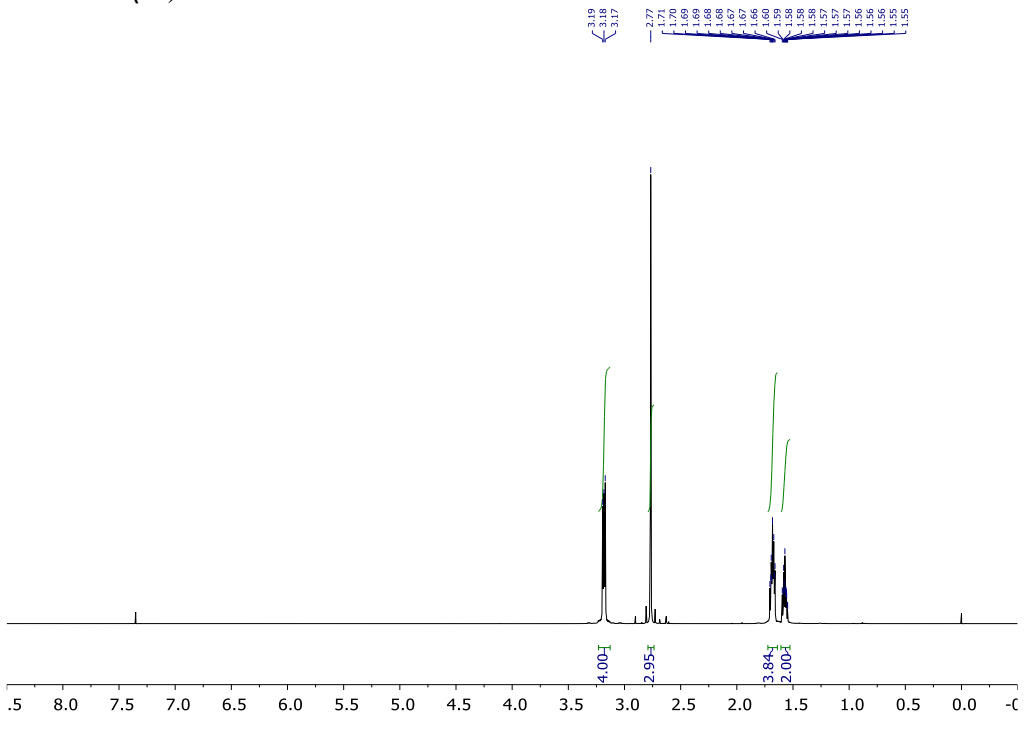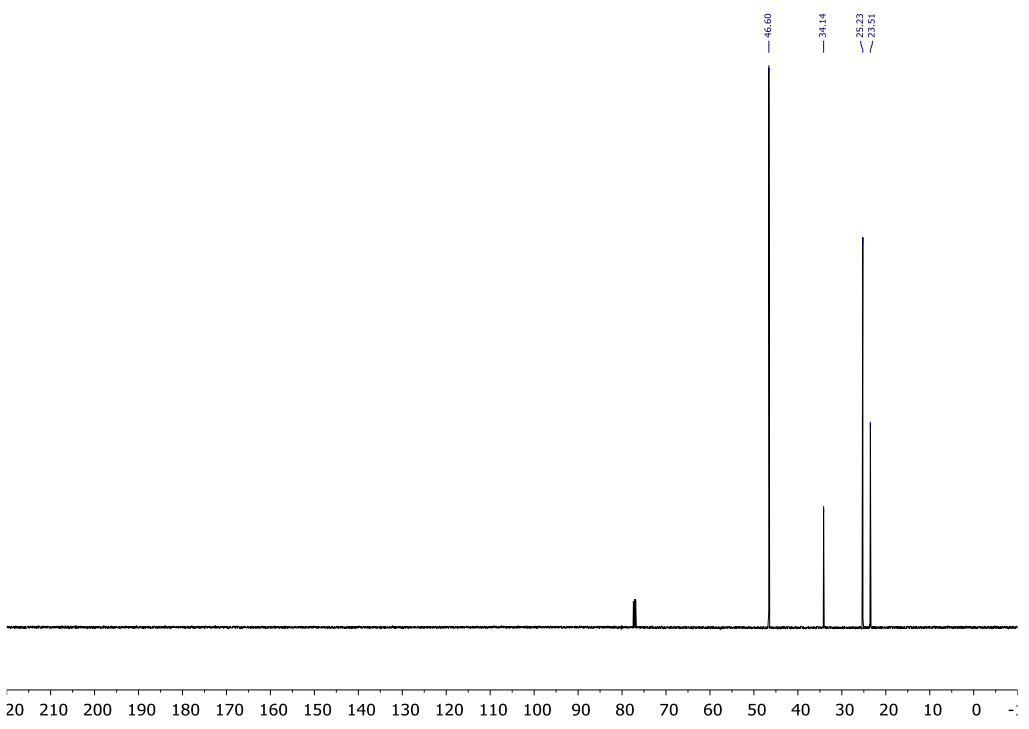

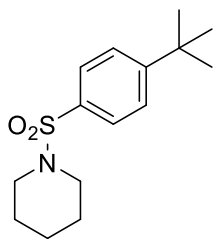

(1g)

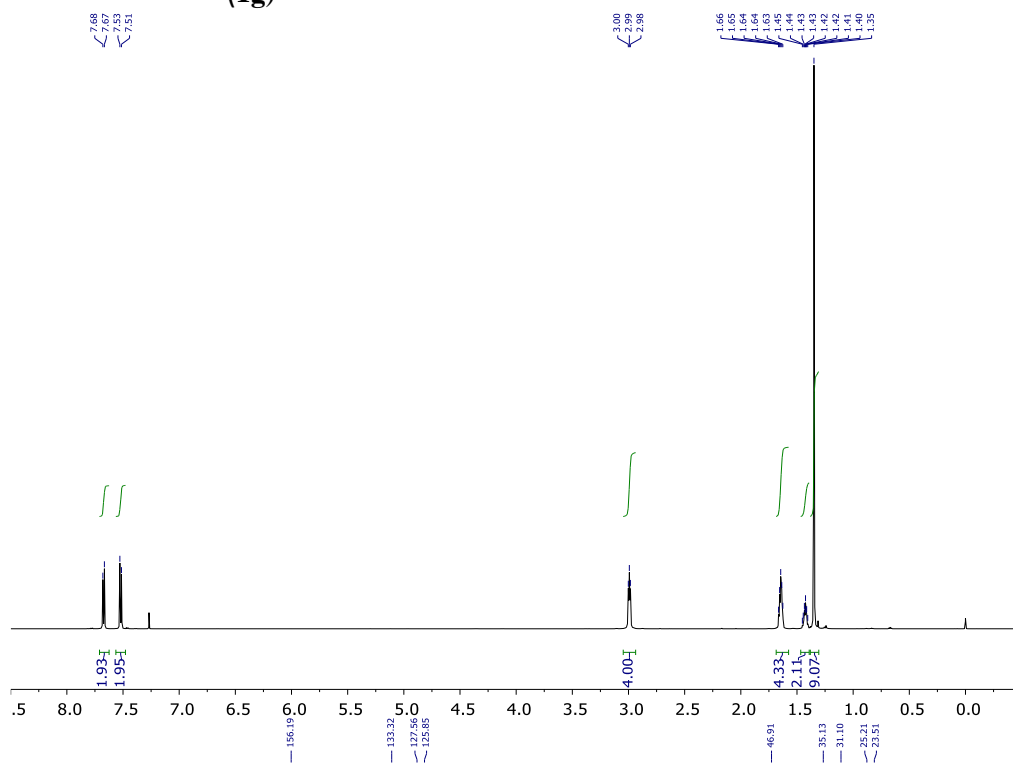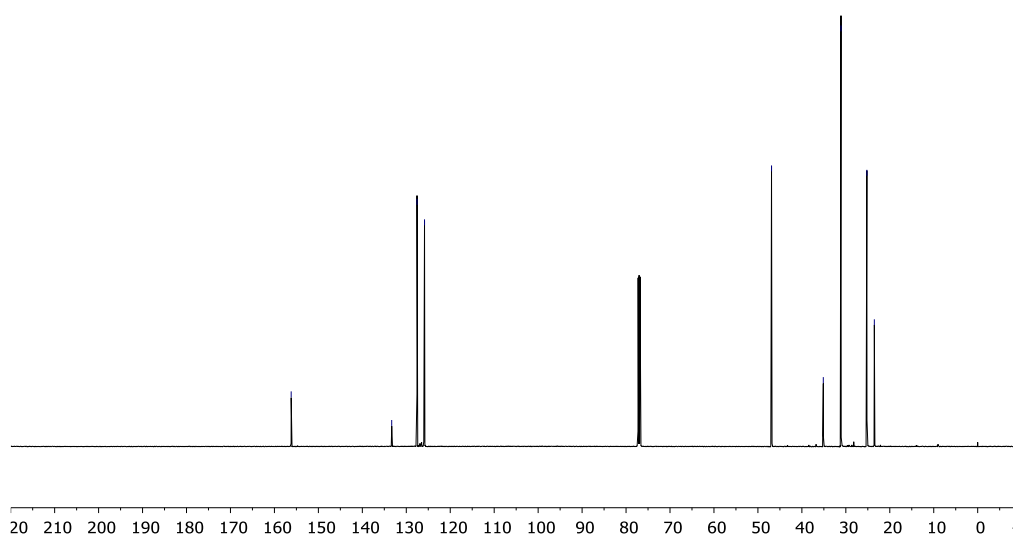

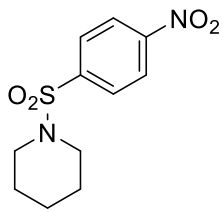

(1h)

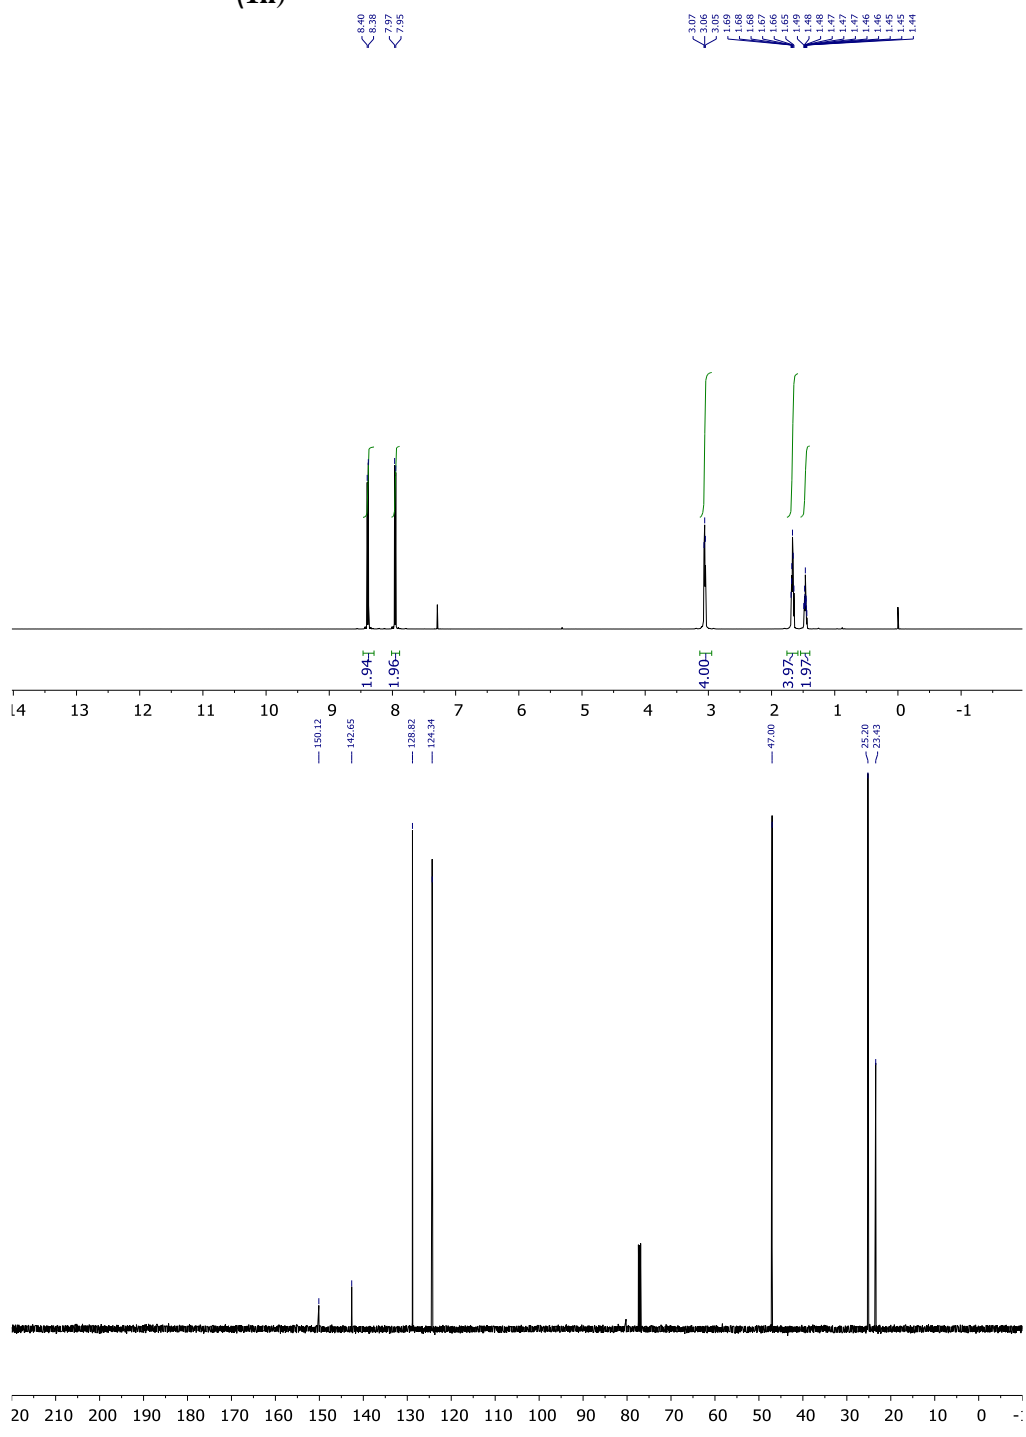

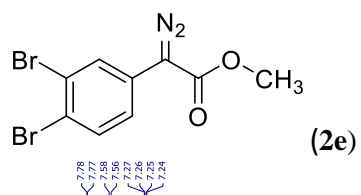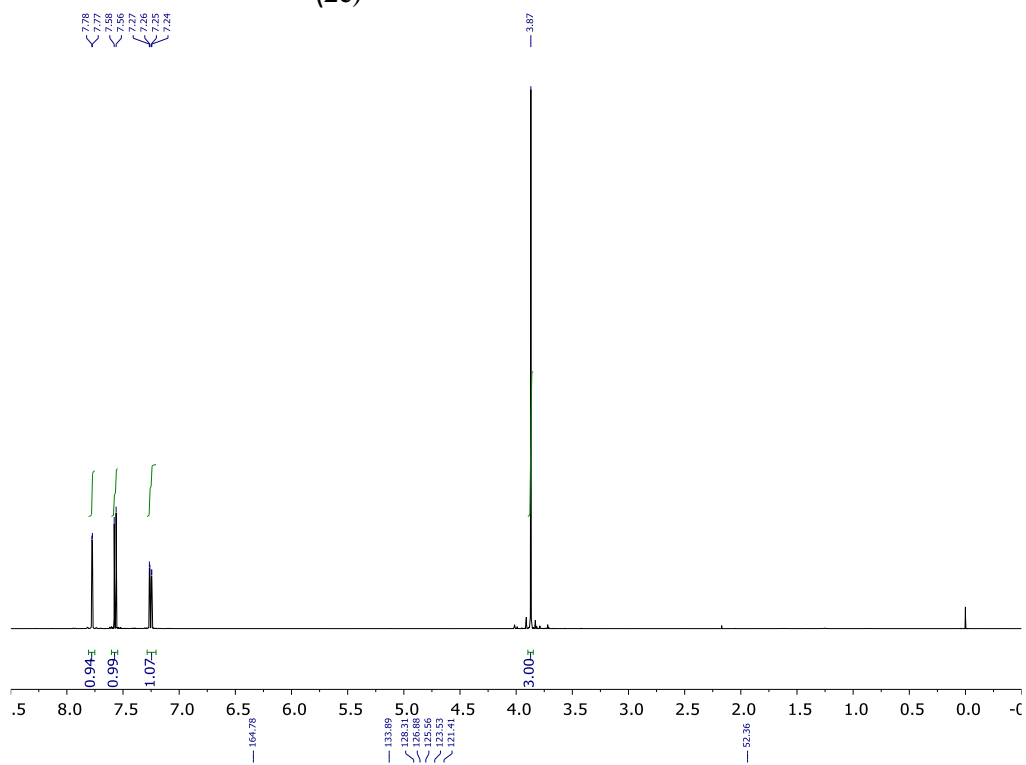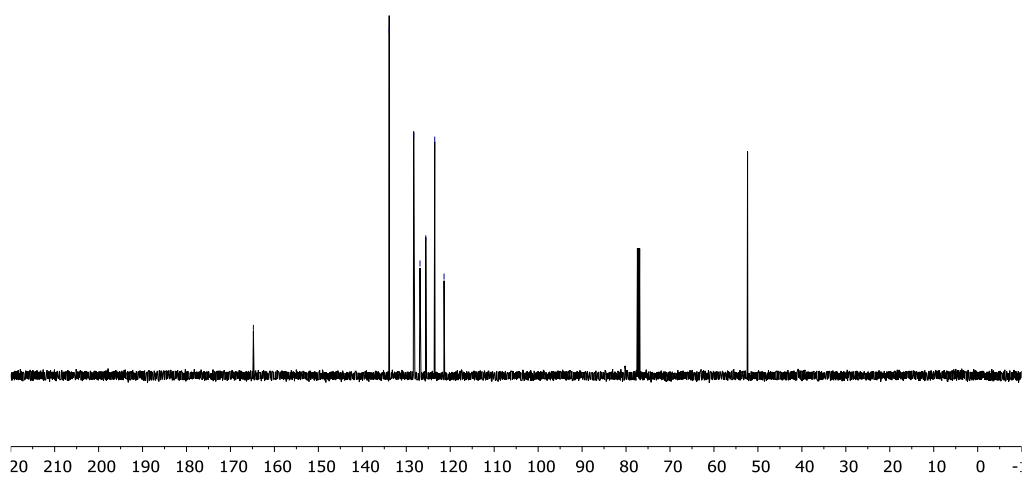

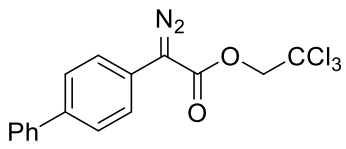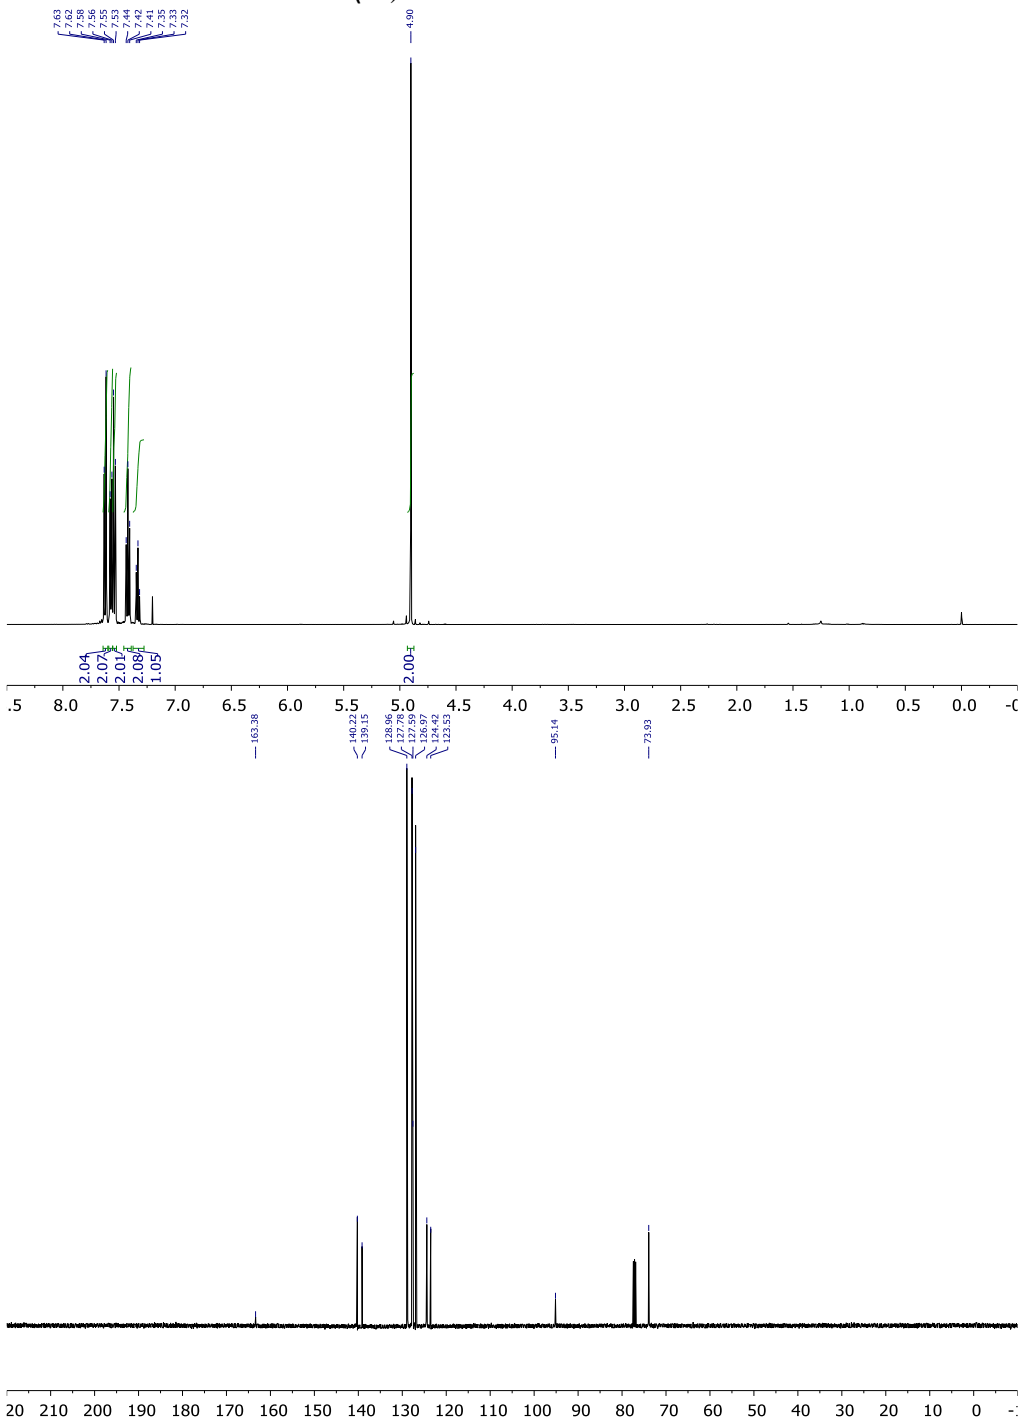

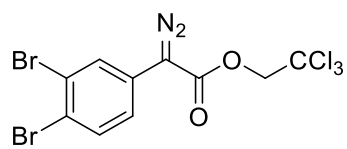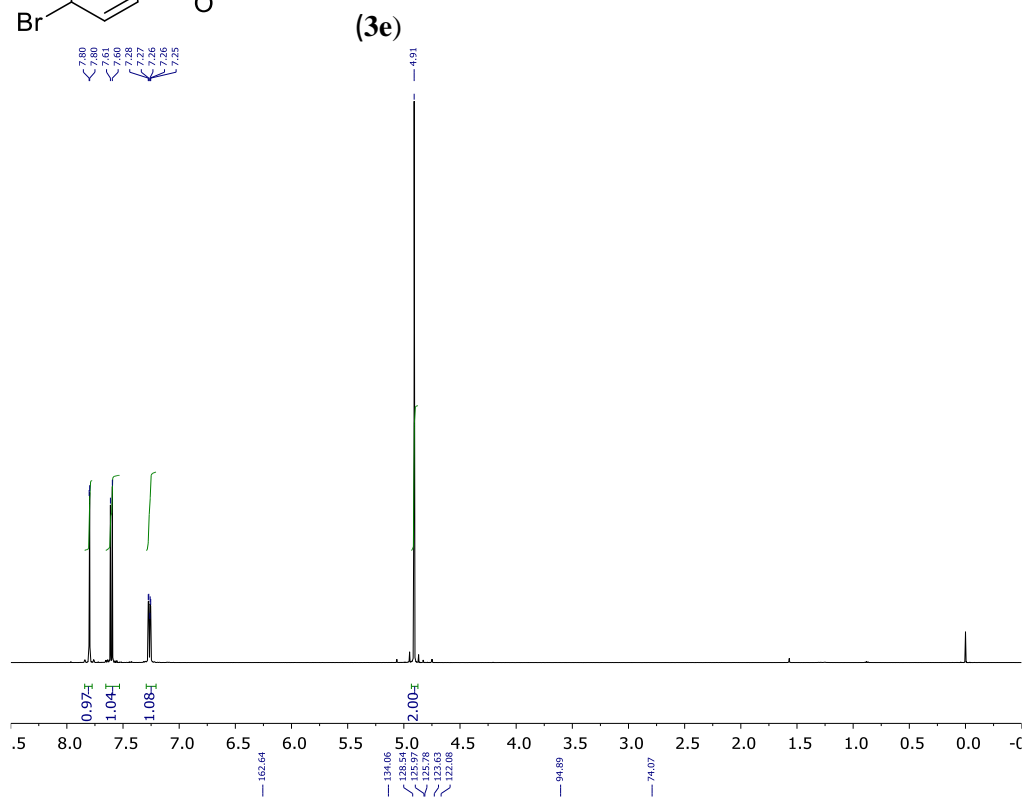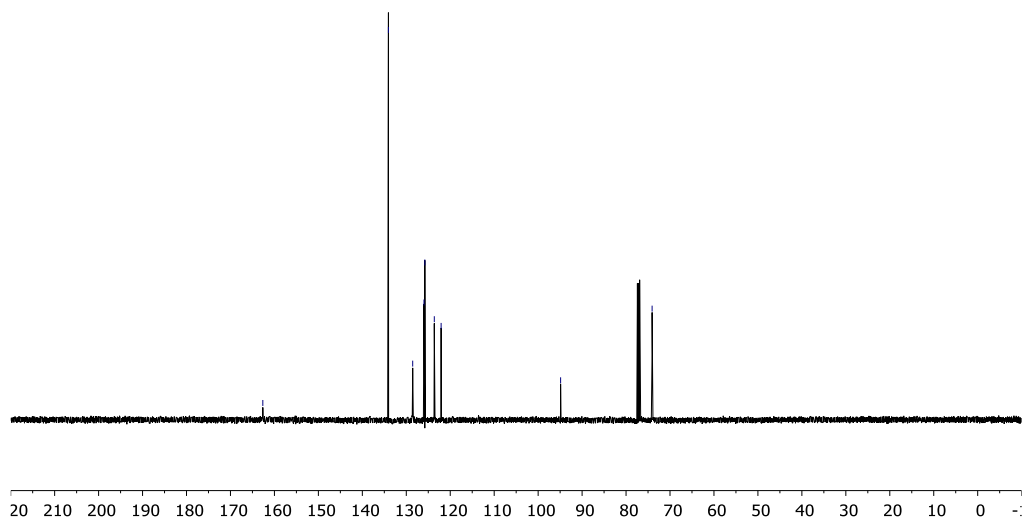



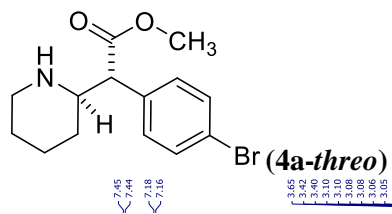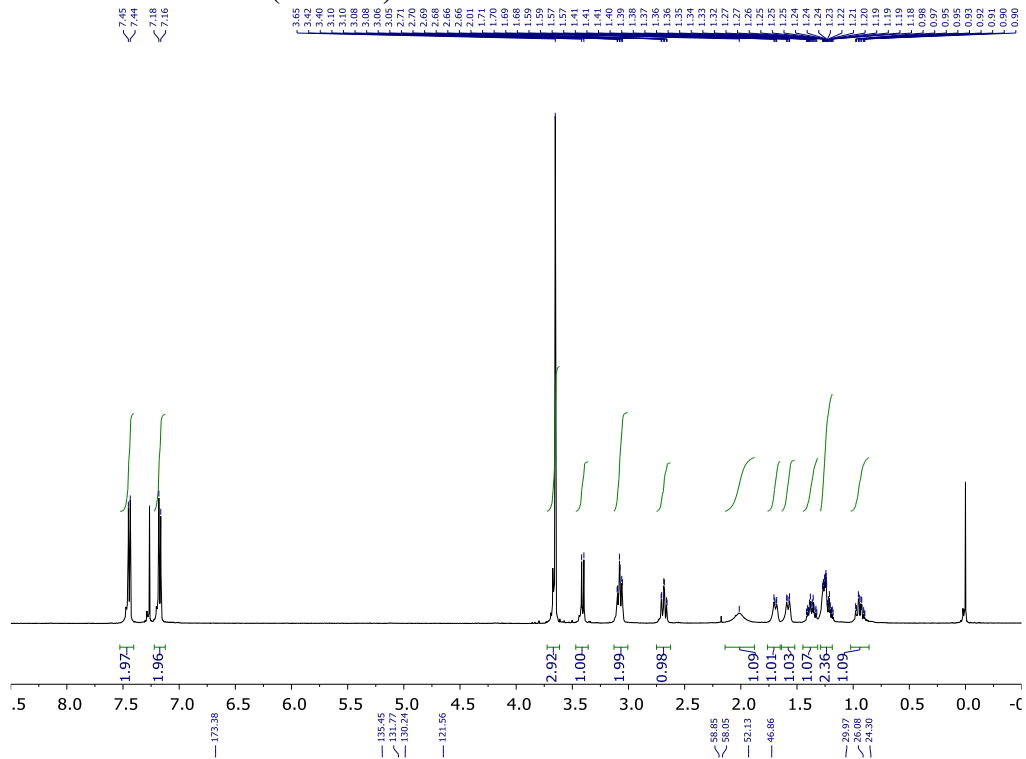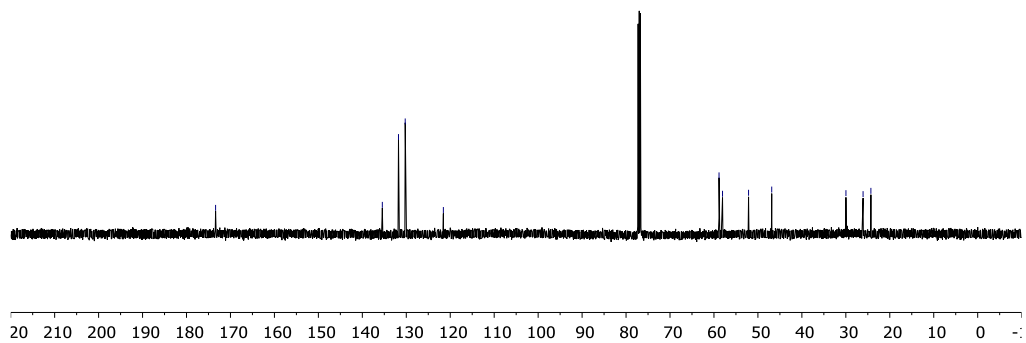



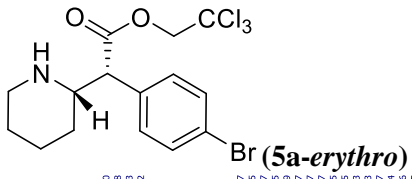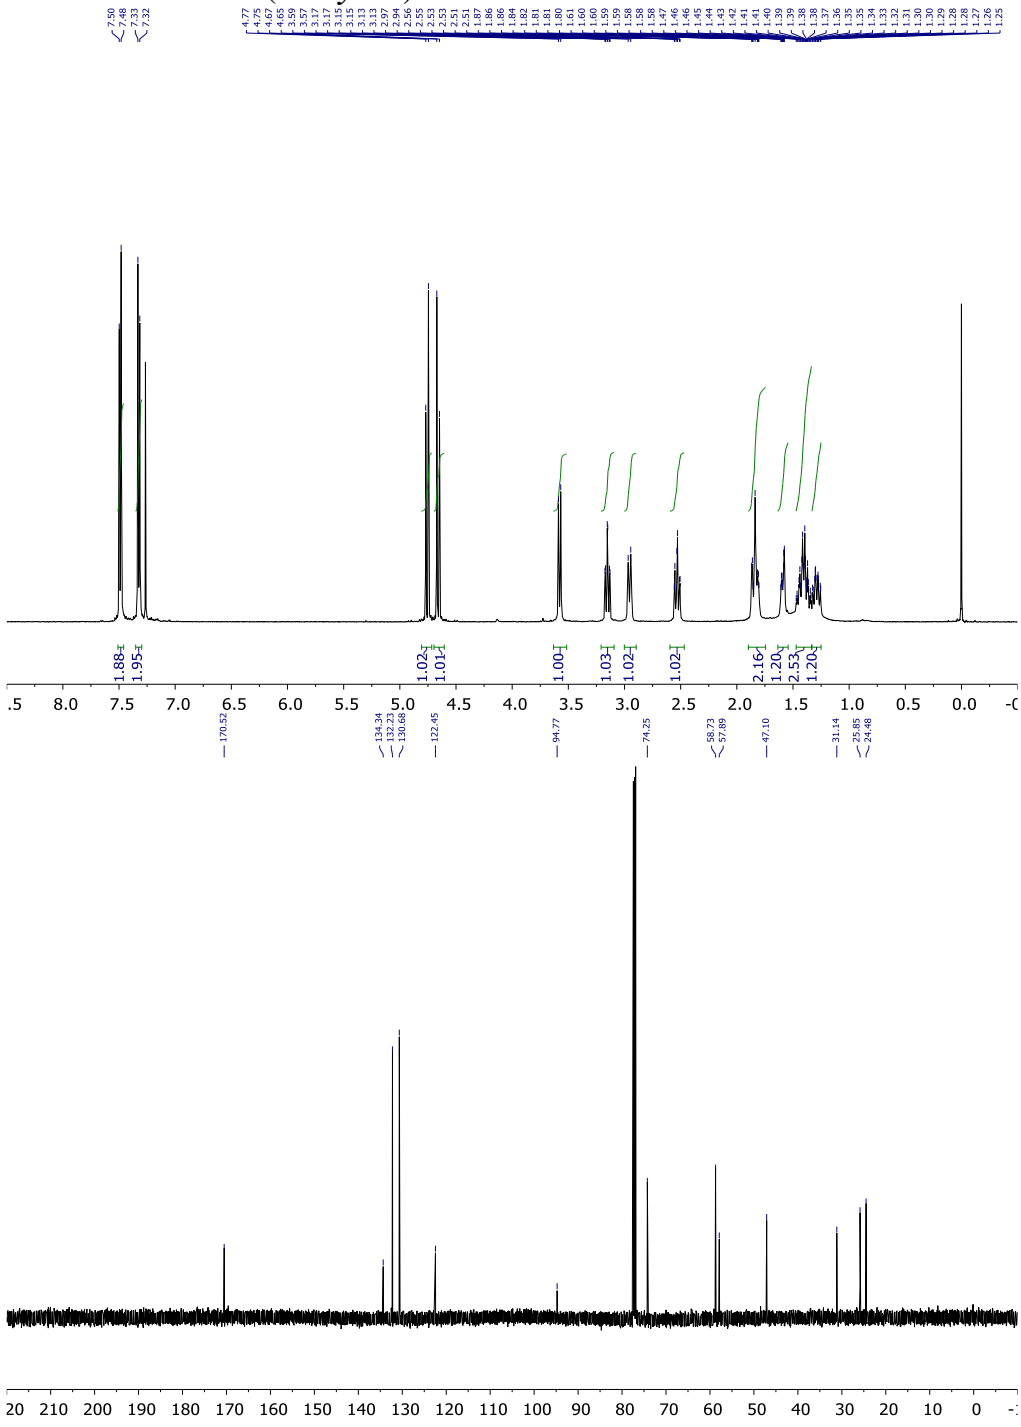

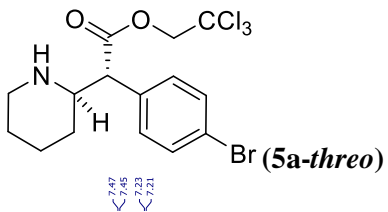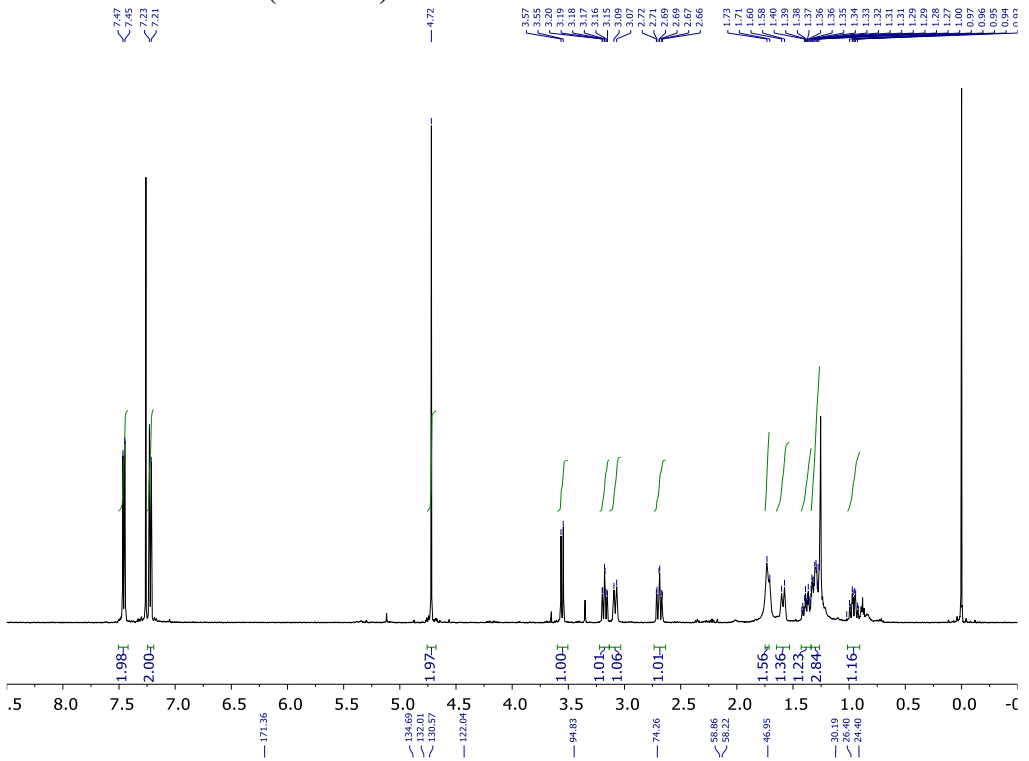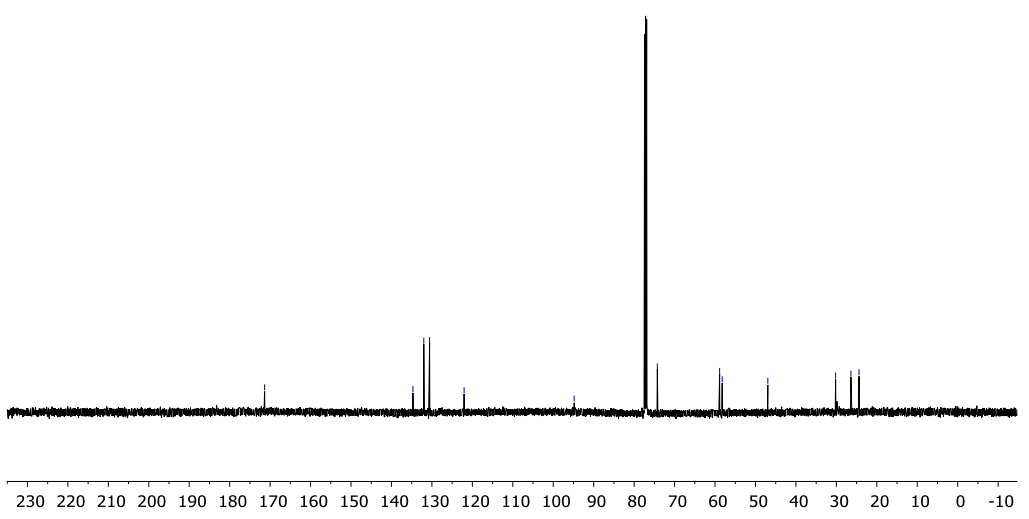

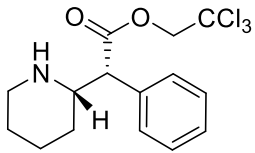

(5b-erythro)

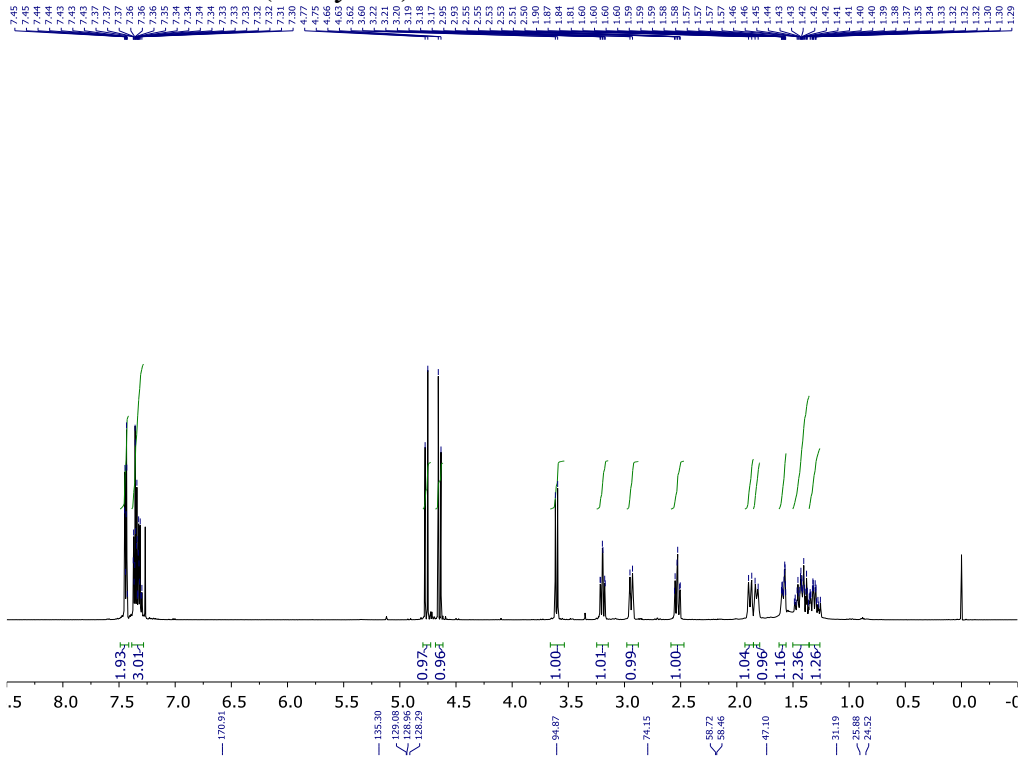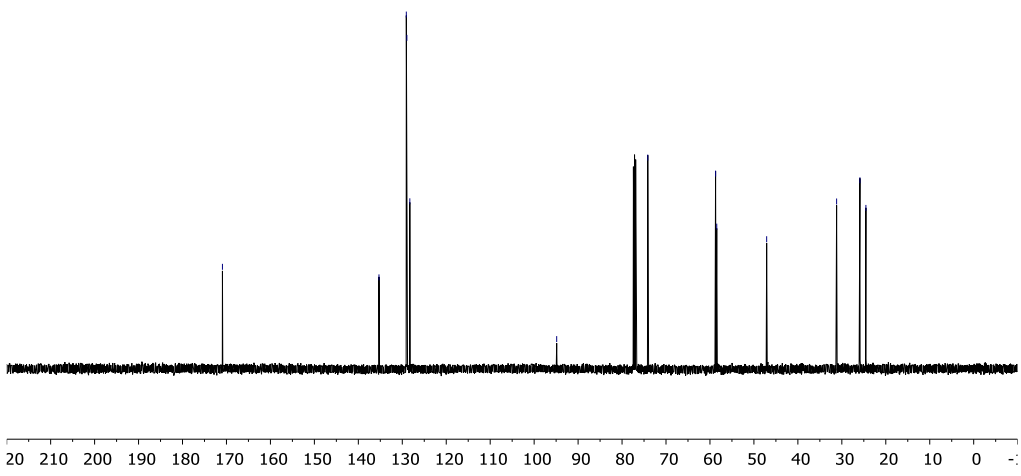

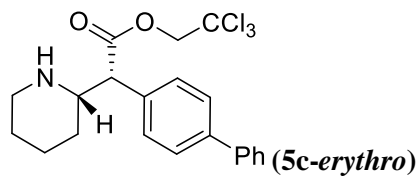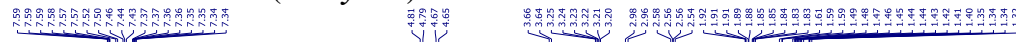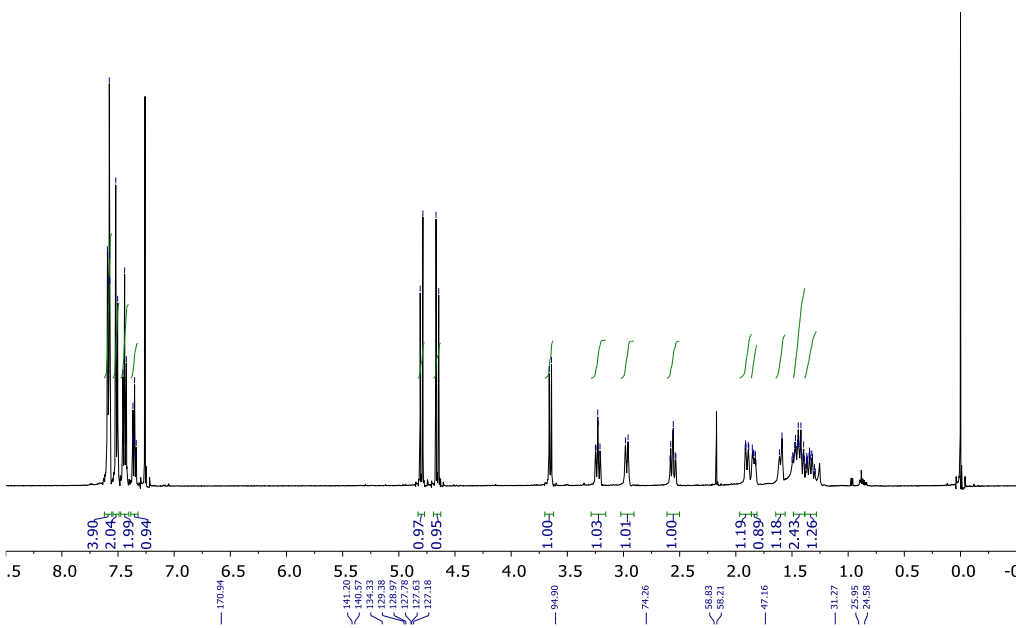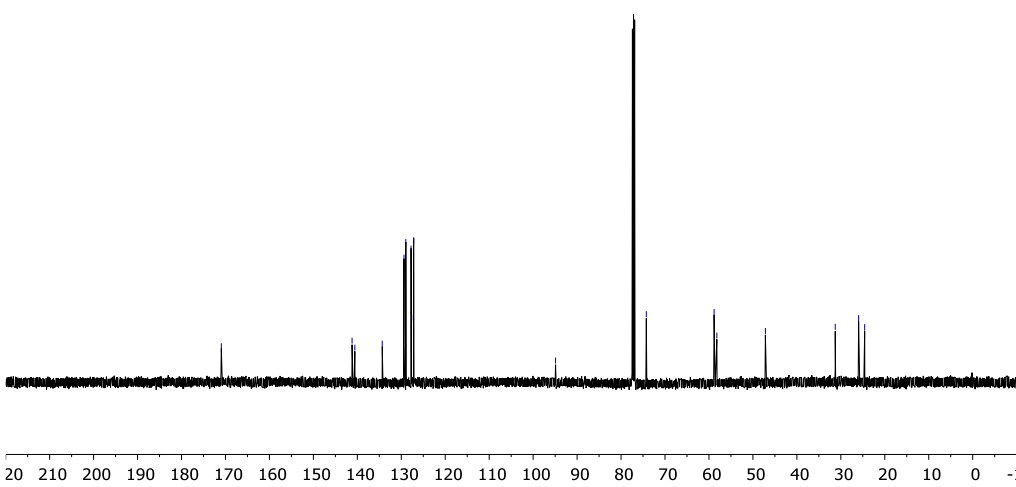

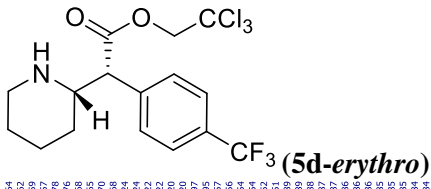

7.64  
 7.62  
 7.57  
 7.57  
 4.78  
 4.76  
 4.65  
 3.70  
 3.24  
 3.22  
 3.20  
 3.20  
 2.97  
 2.57  
 2.56  
 2.54  
 2.52  
 2.51  
 1.89  
 1.88  
 1.87  
 1.86  
 1.85  
 1.85  
 1.85  
 1.84  
 1.83  
 1.83  
 1.82  
 1.82  
 1.61  
 1.61  
 1.60  
 1.60  
 1.60  
 1.59  
 1.59  
 1.58  
 1.58  
 1.57  
 1.57  
 1.44  
 1.44  
 1.43  
 1.43  
 1.42  
 1.42  
 1.41  
 1.41  
 1.40  
 1.40  
 1.39  
 1.38  
 1.36  
 1.34  
 1.34  
 1.34  
 1.32  
 1.32  
 1.31  
 1.30  
 1.29  
 1.29  
 1.28  
 1.28

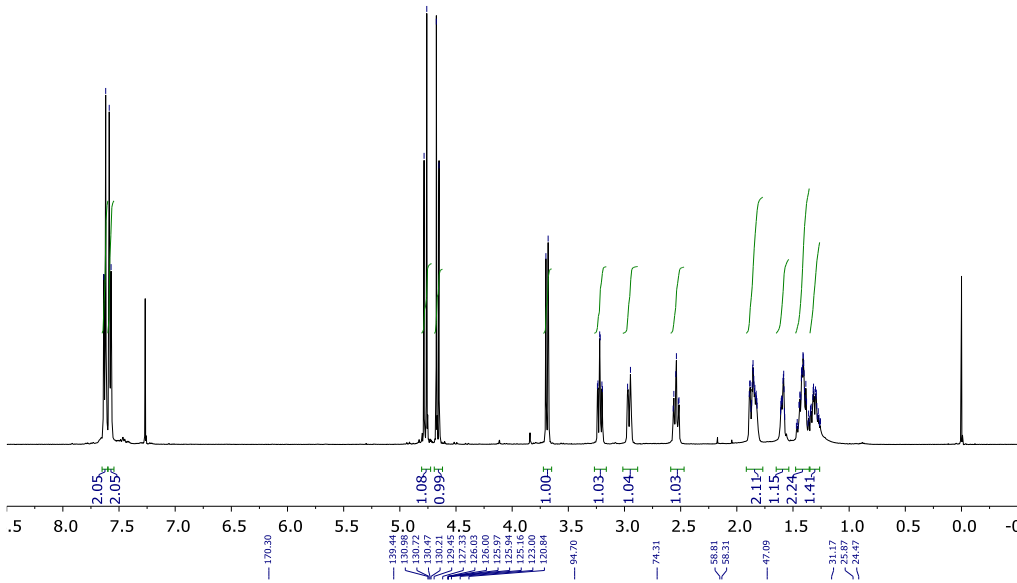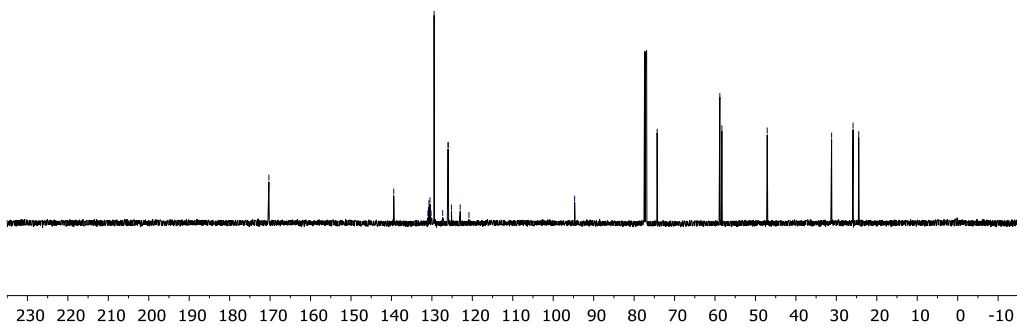

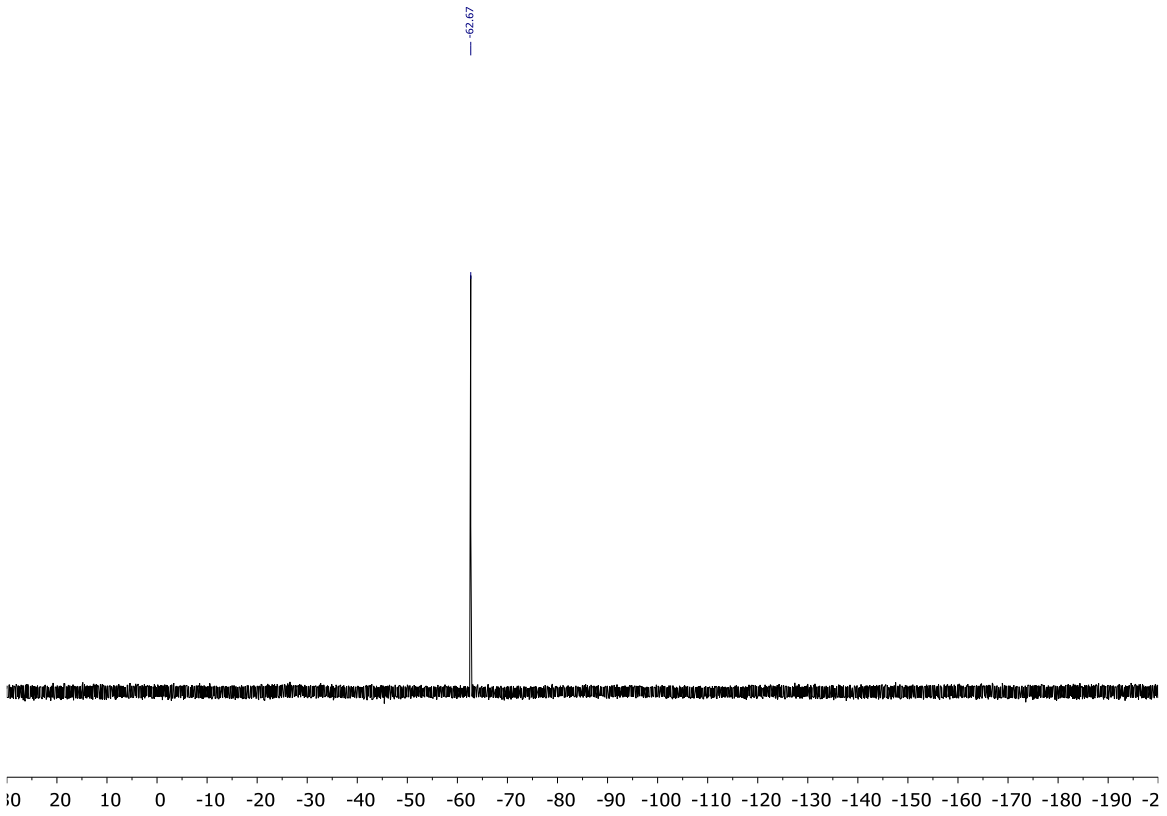



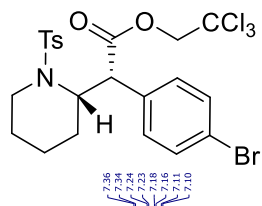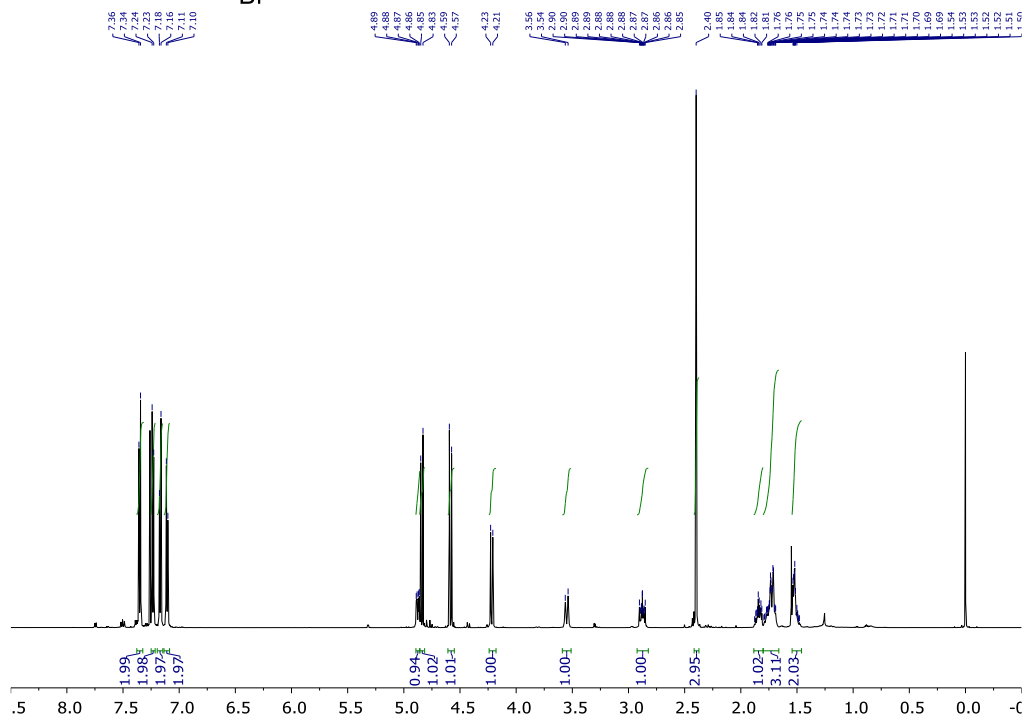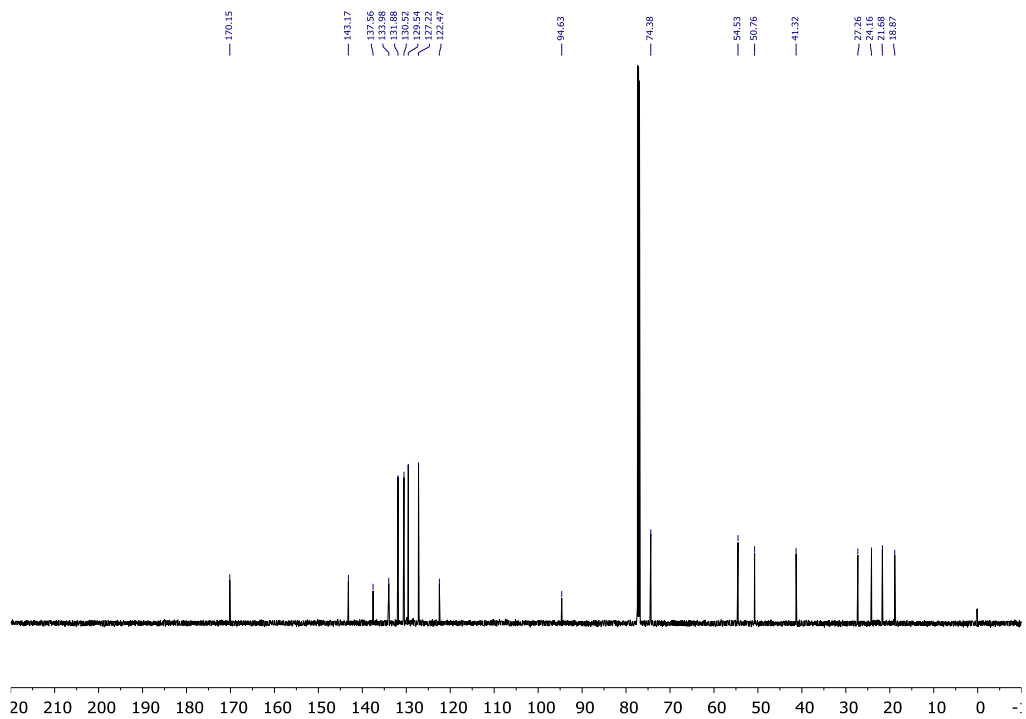



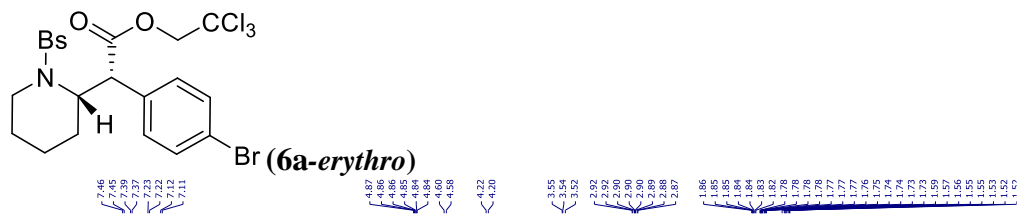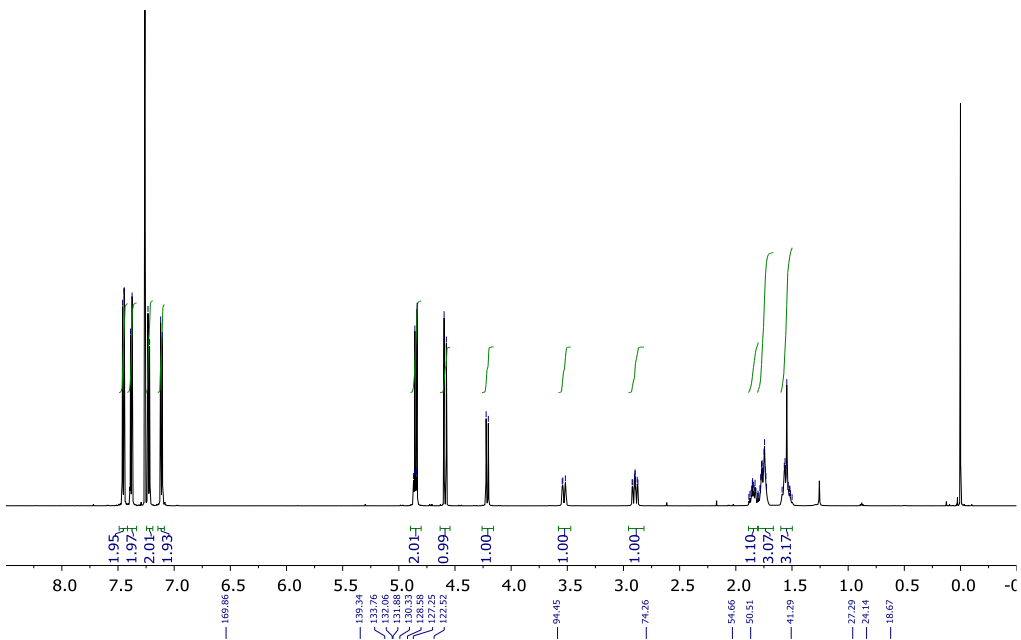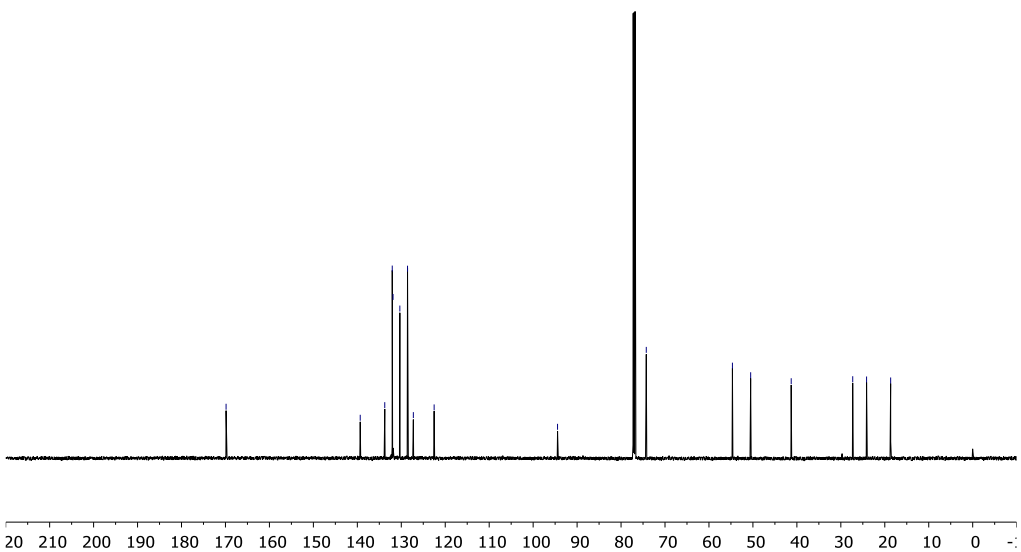

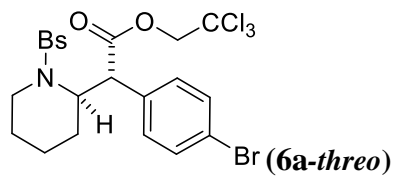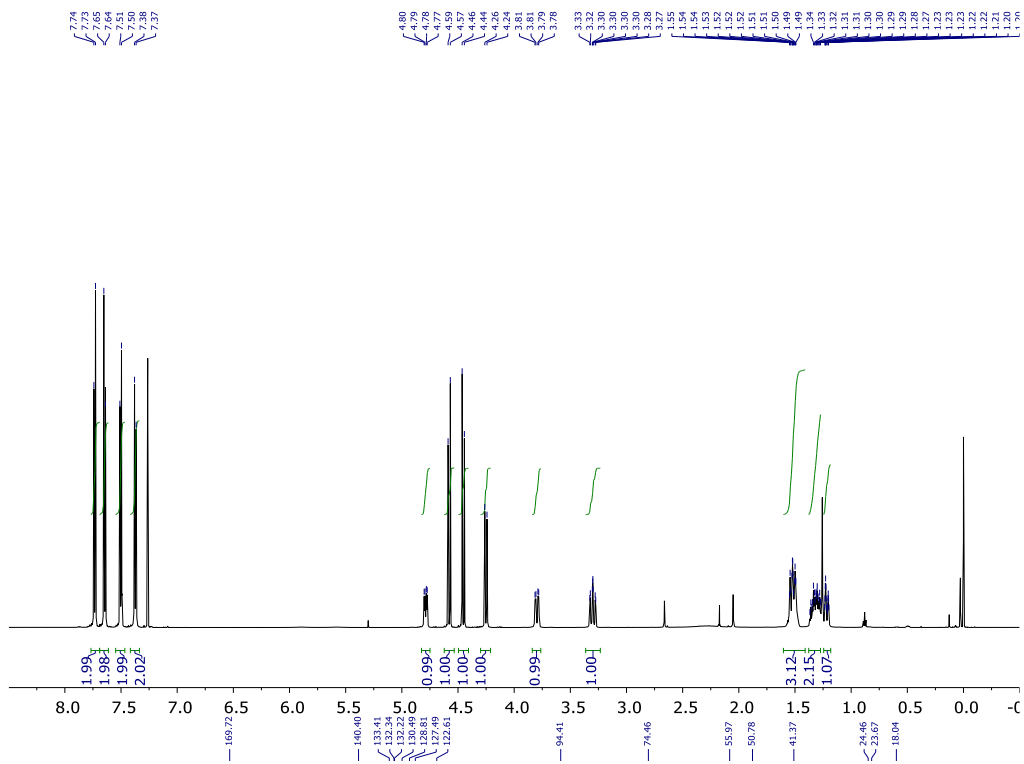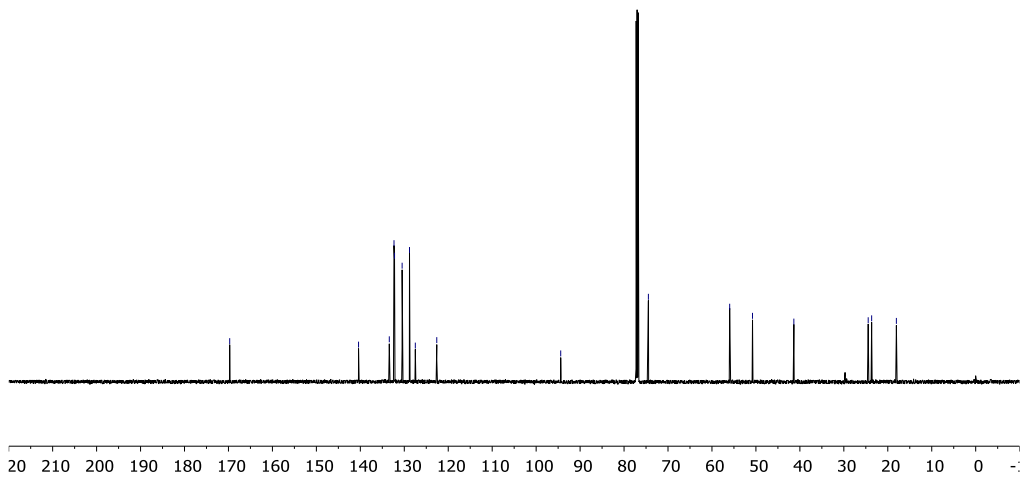

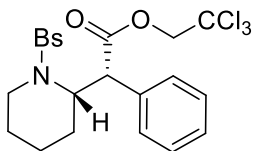

**(6b-erythro)**

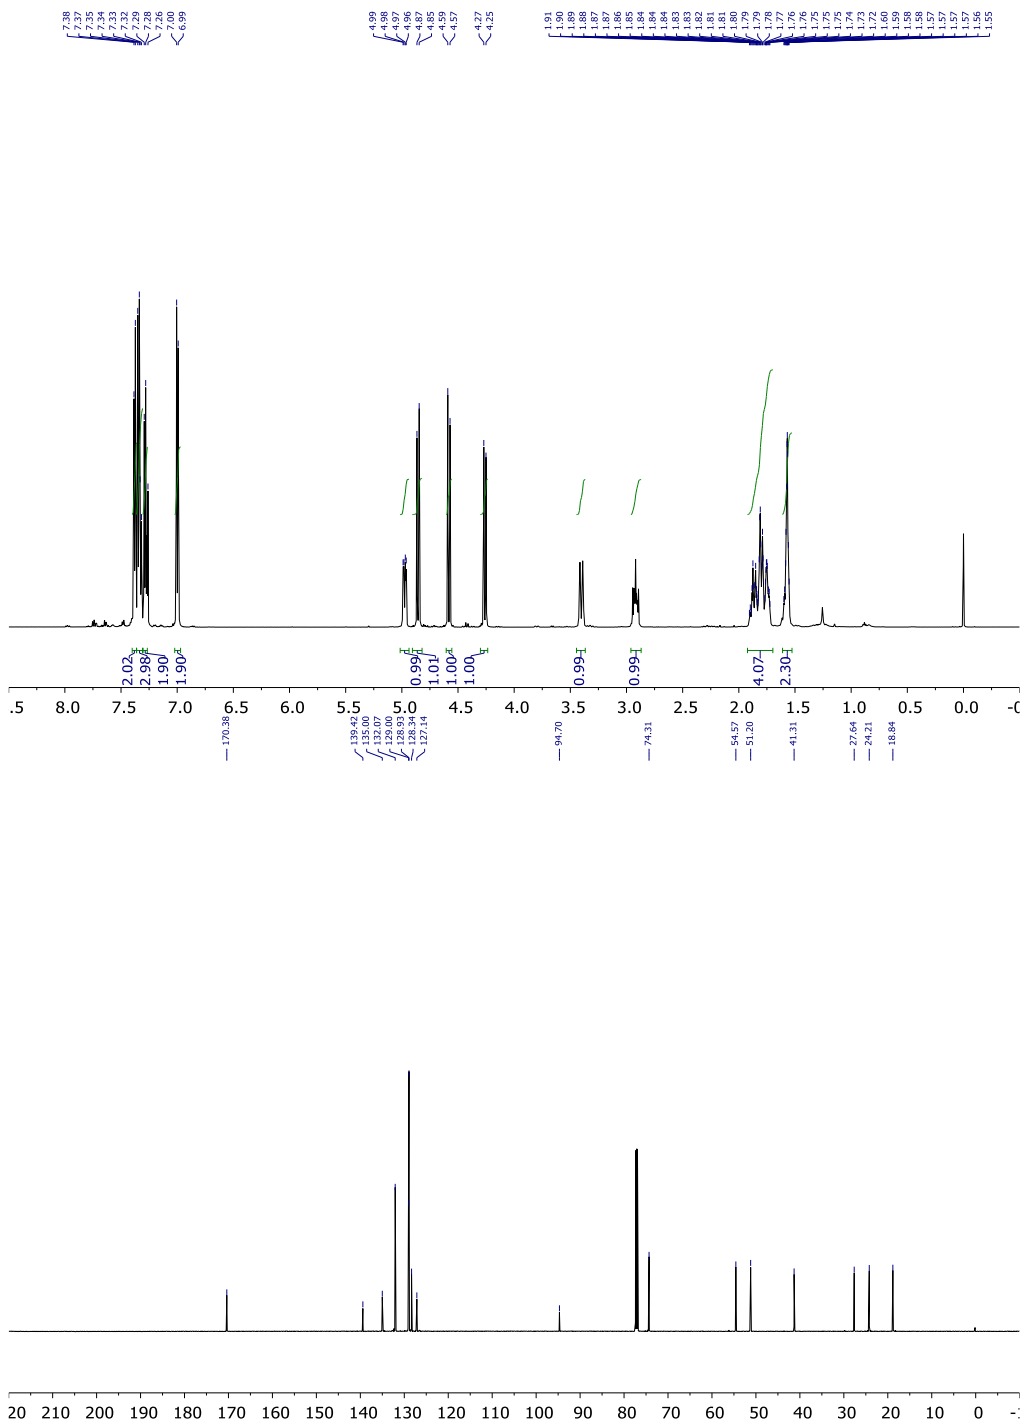



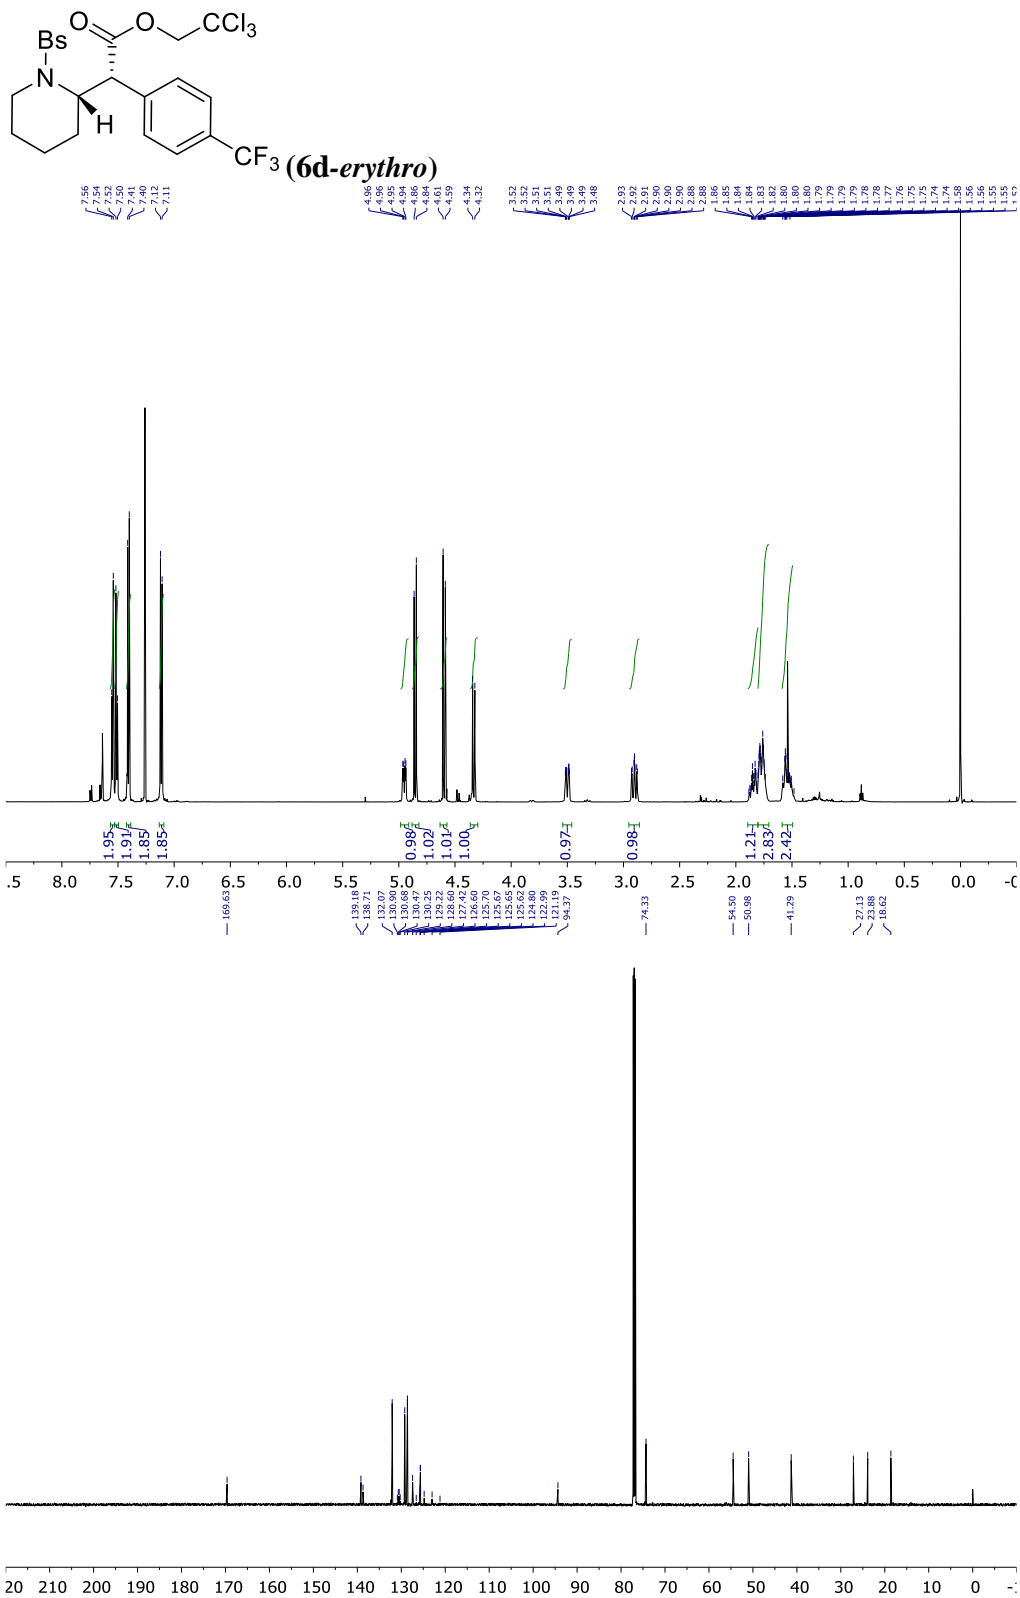

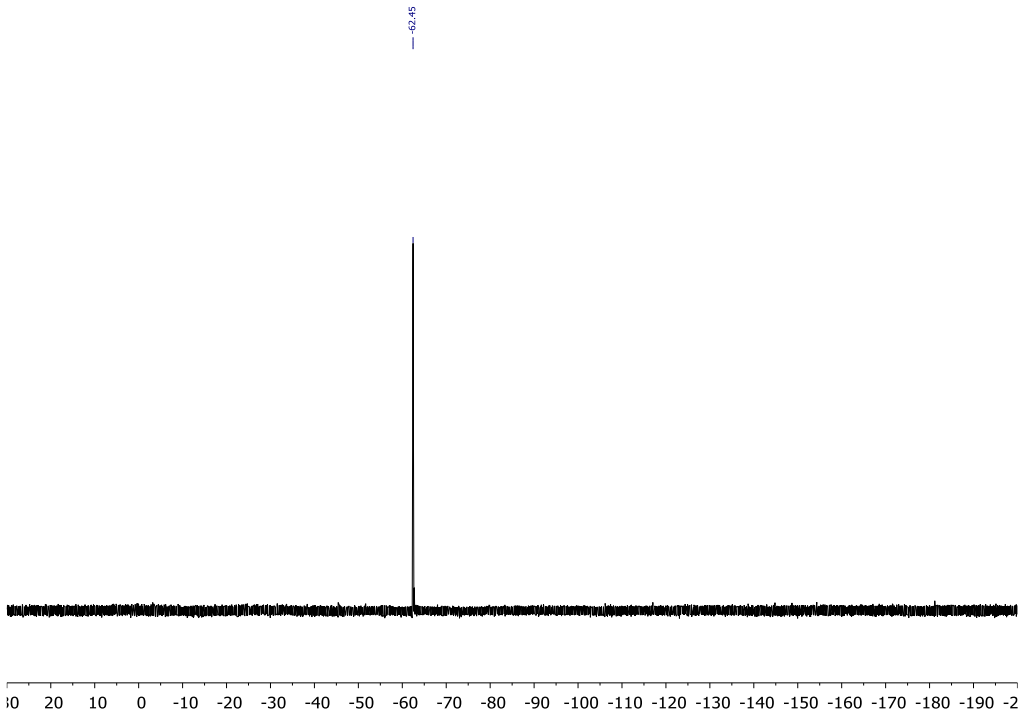

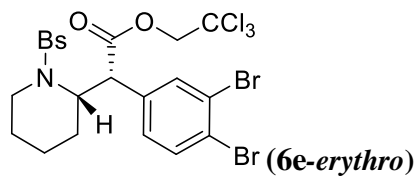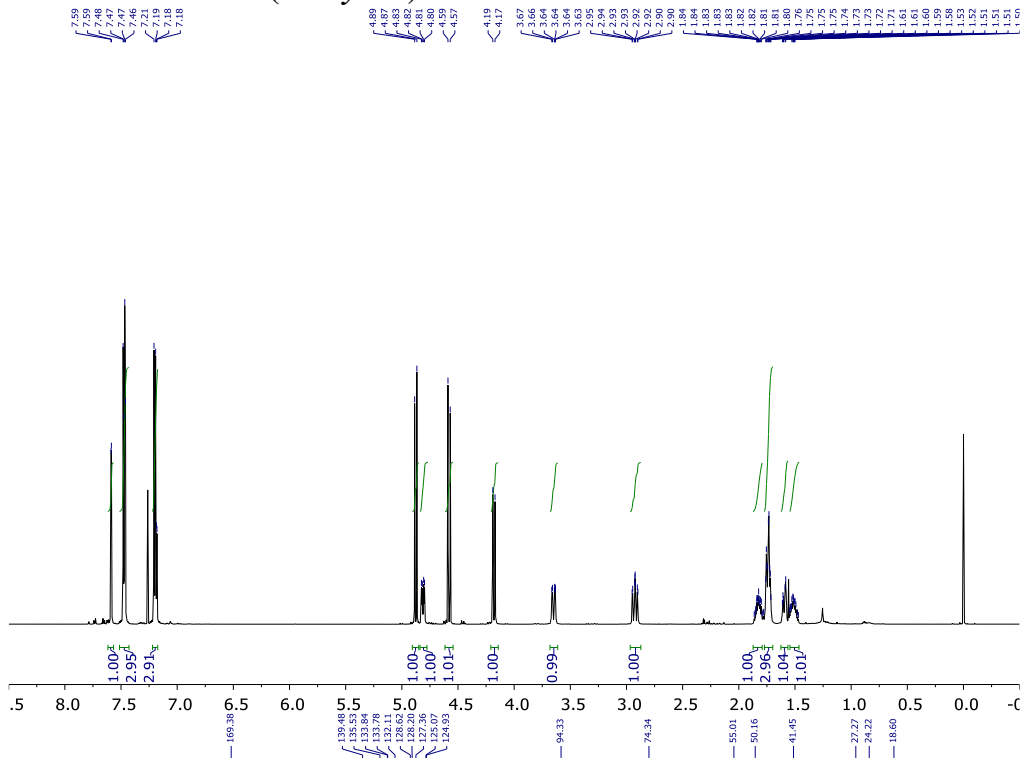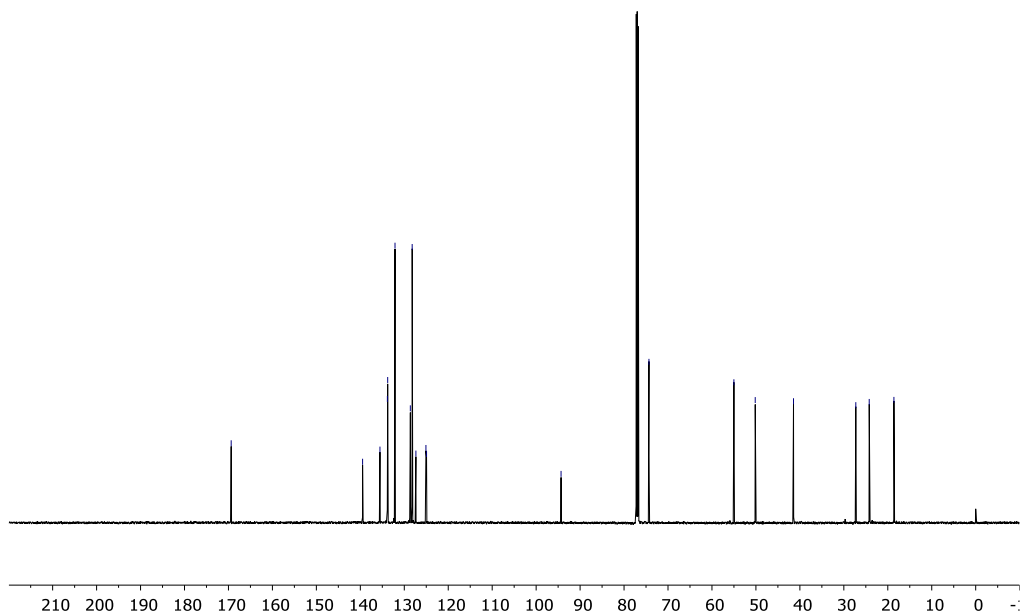

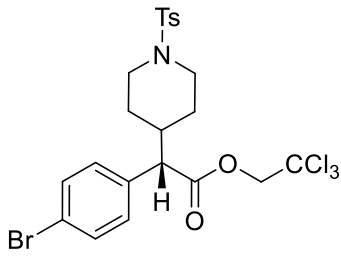

(13b)

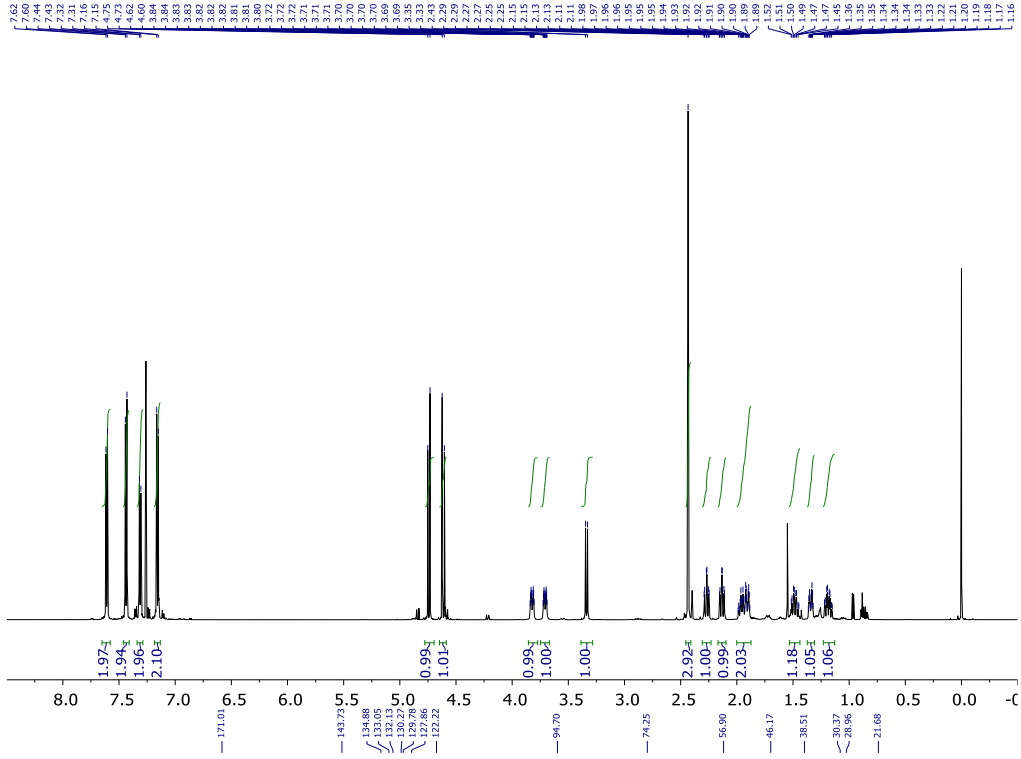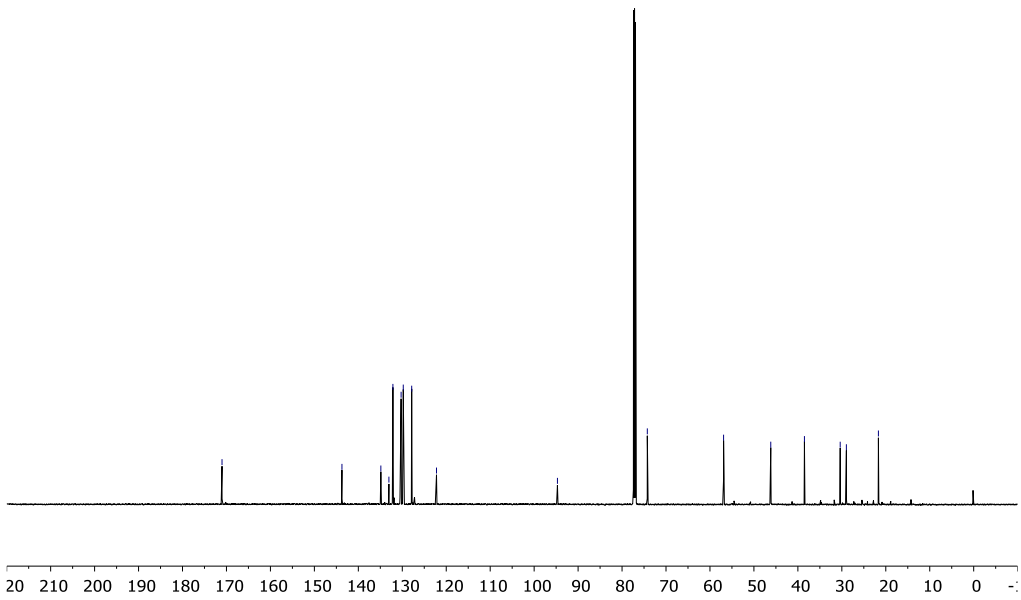



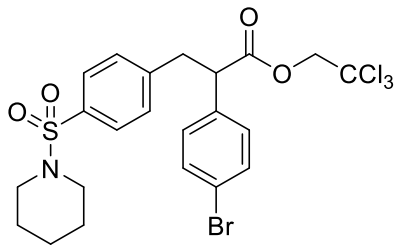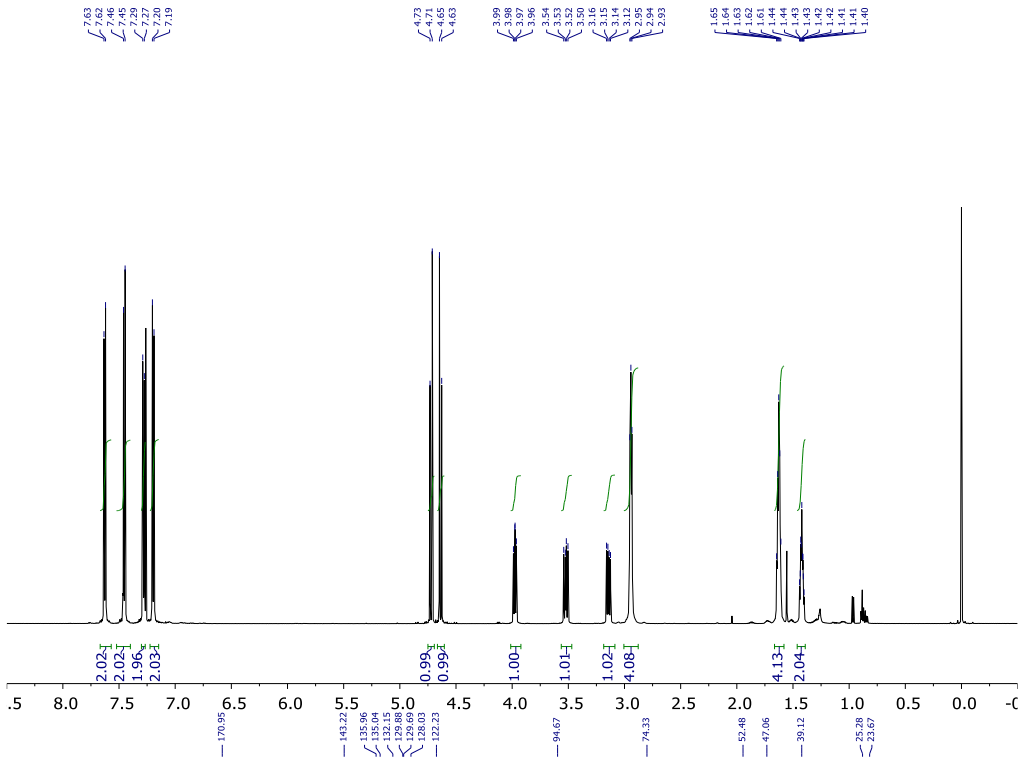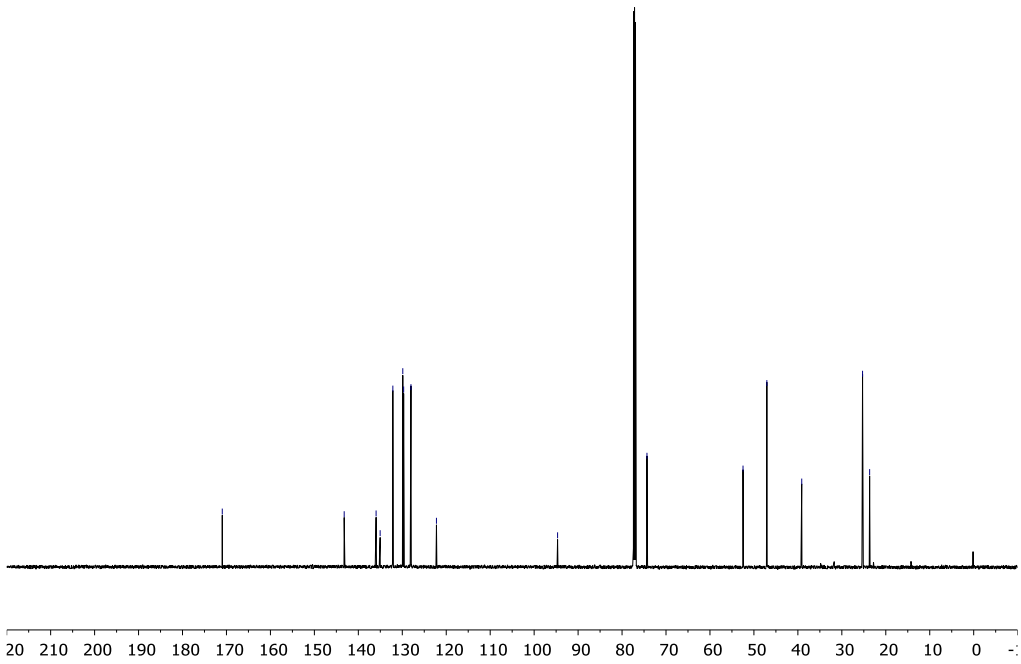

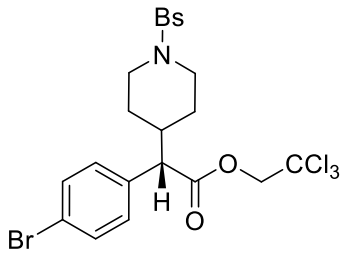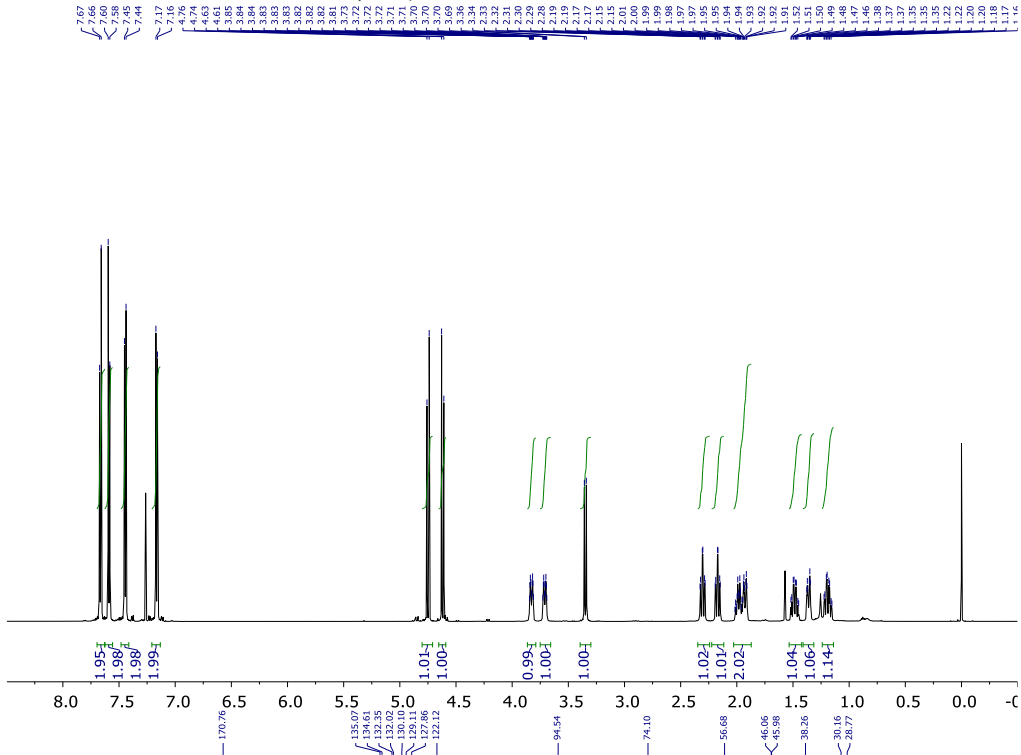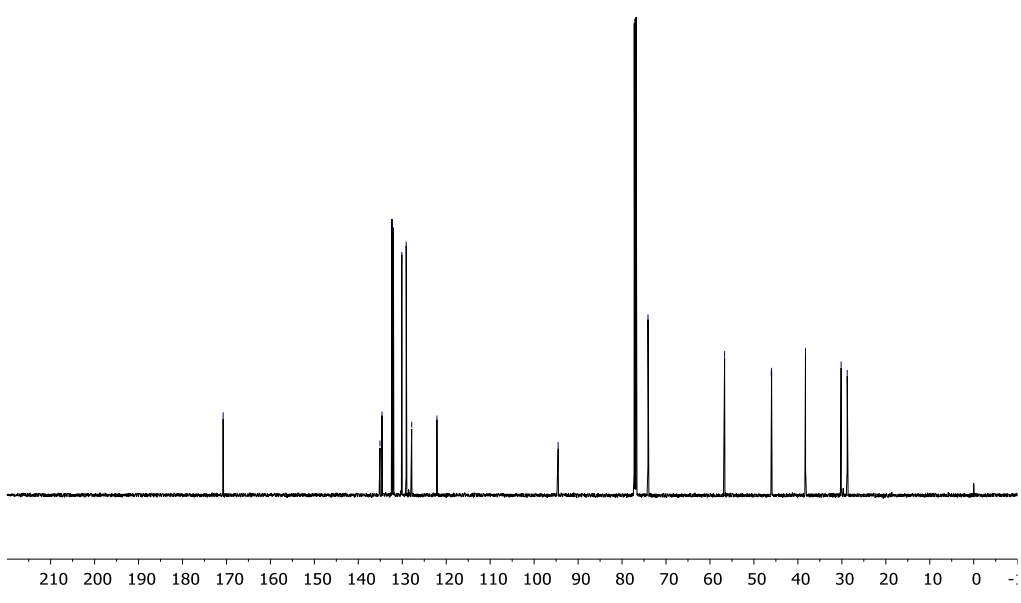

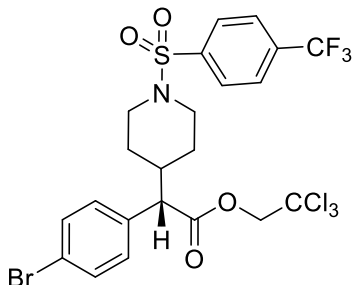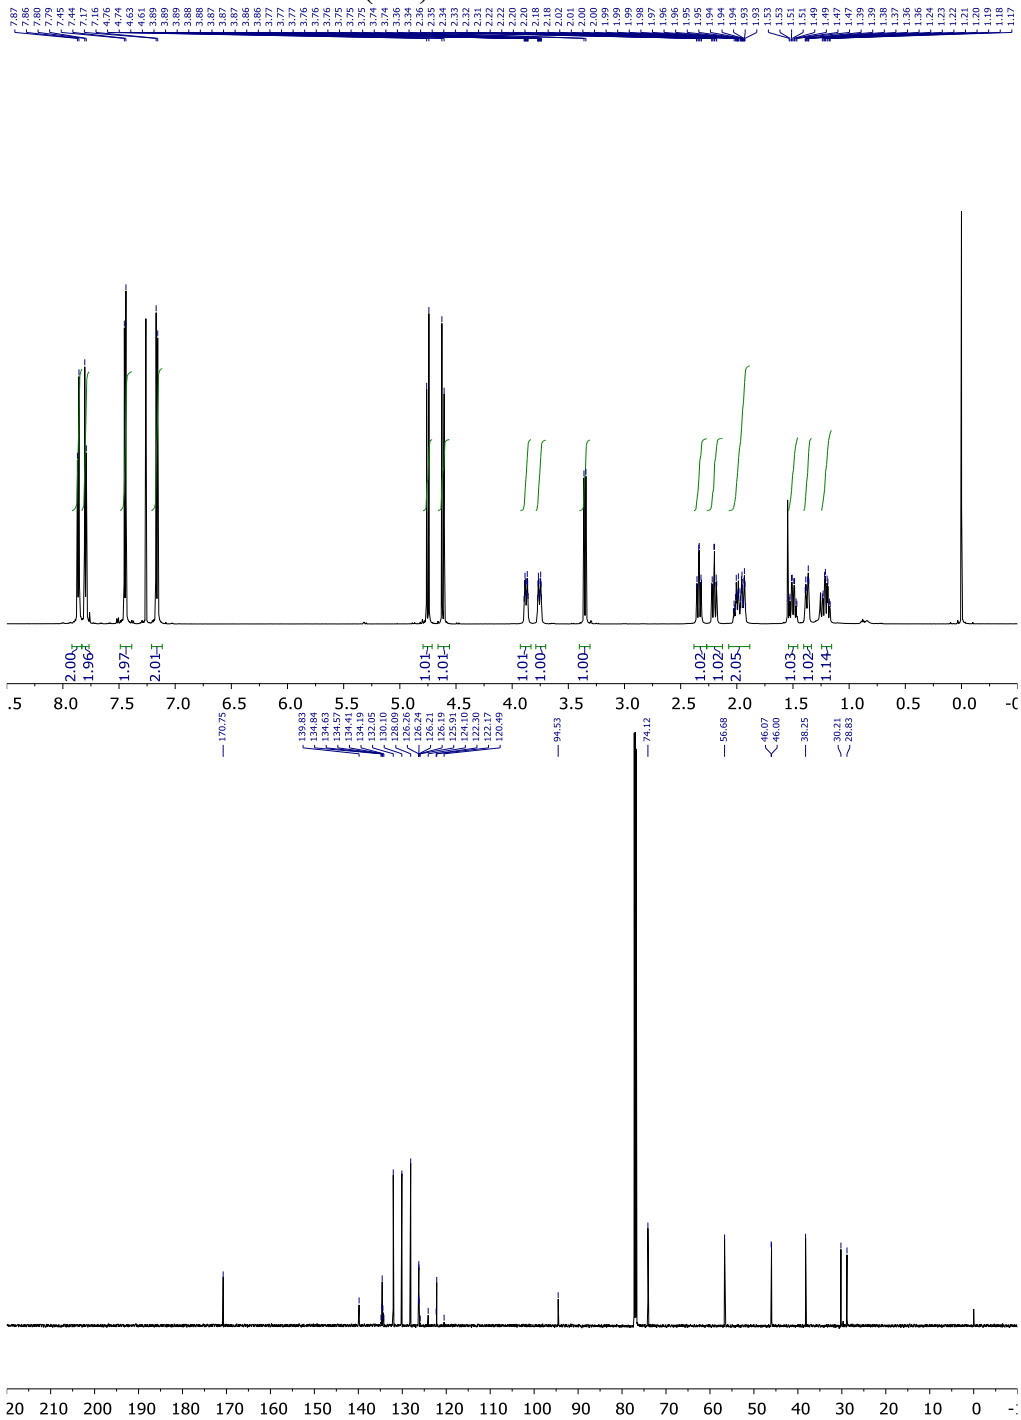

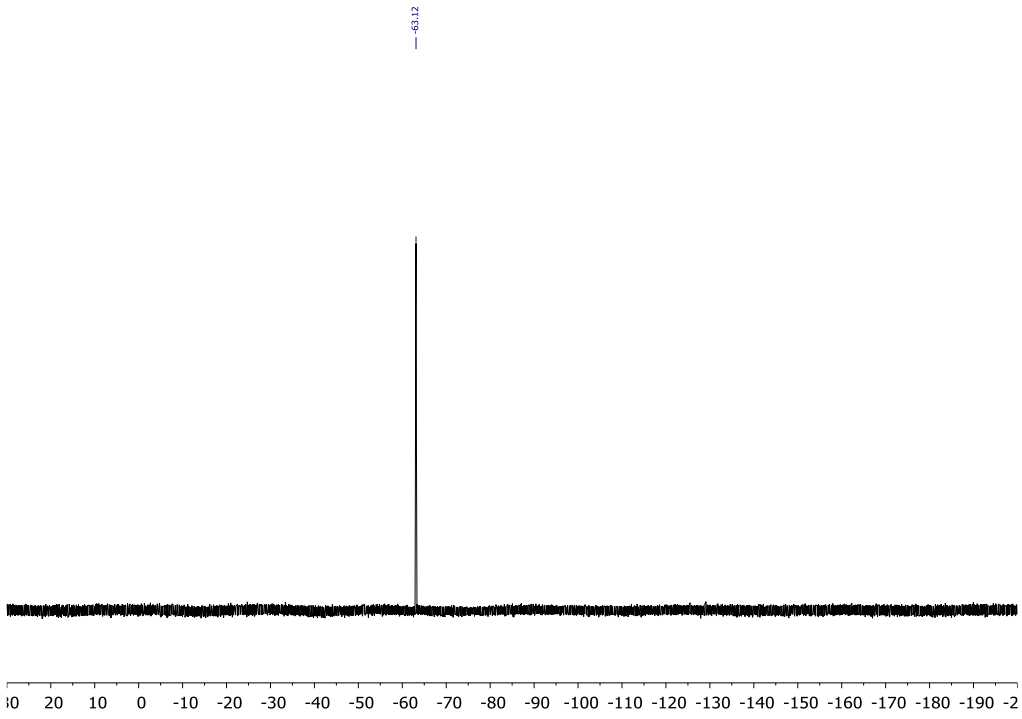

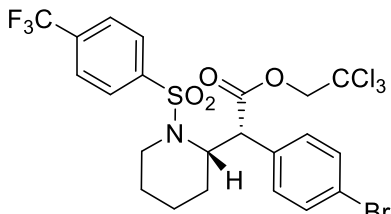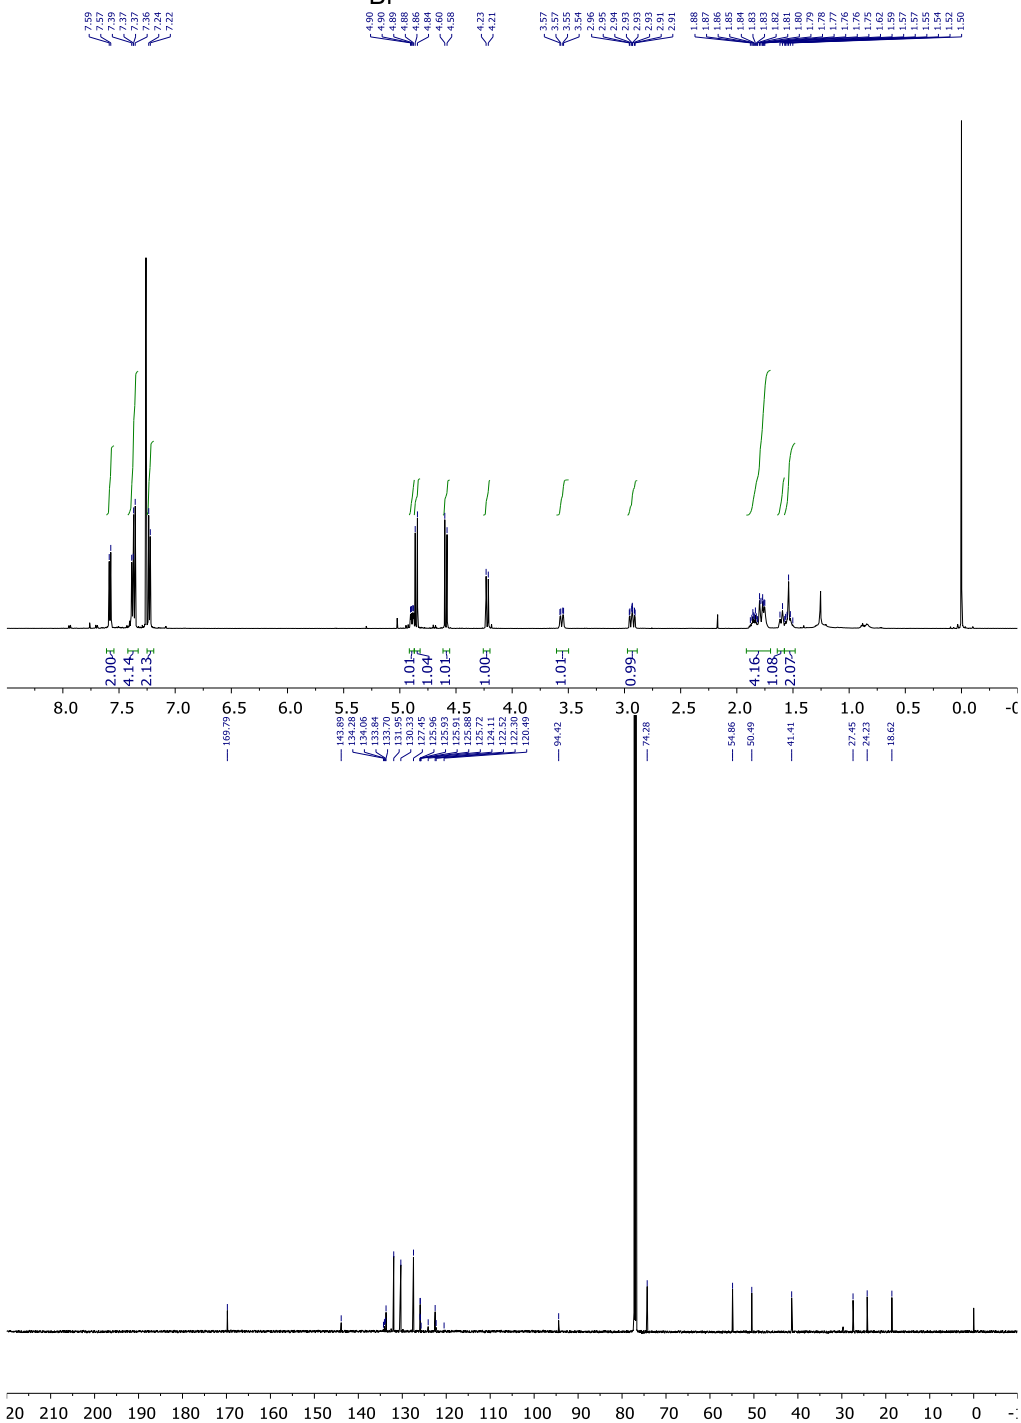

— 62.99

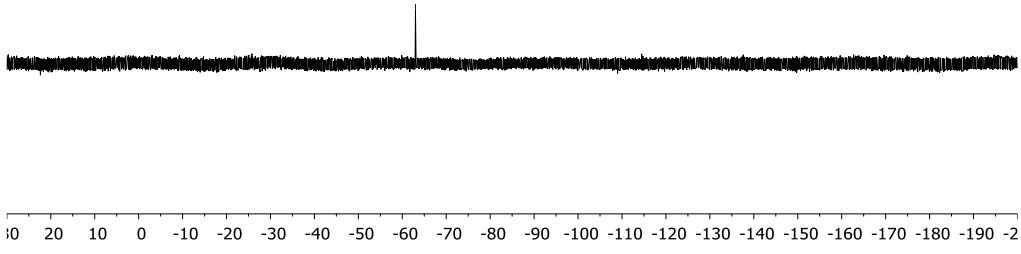



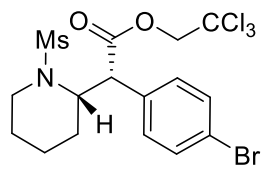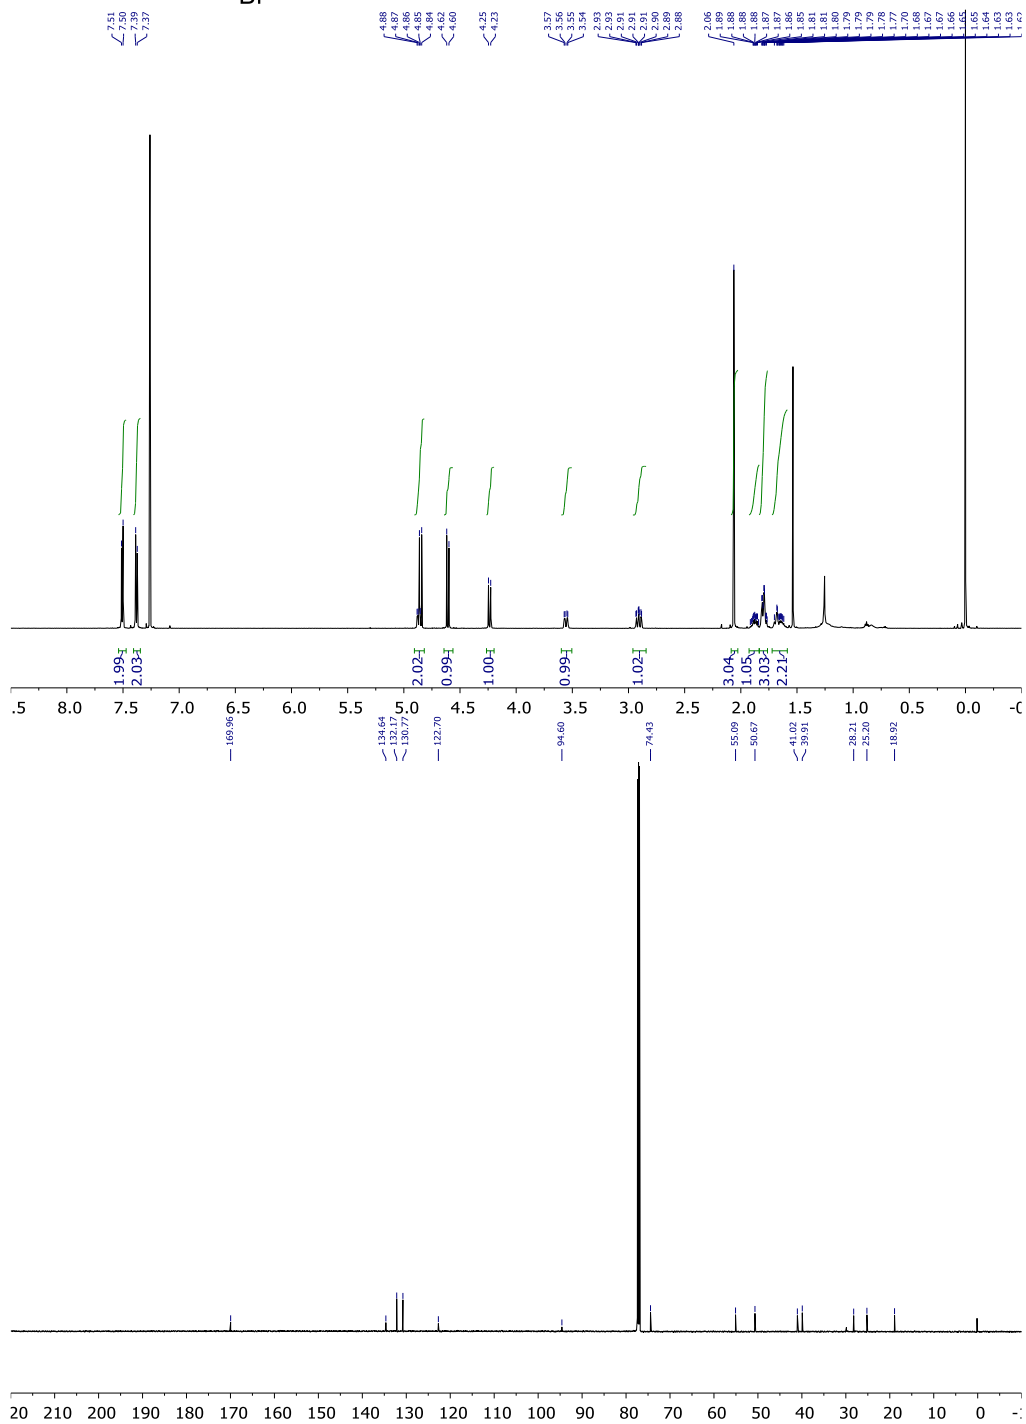



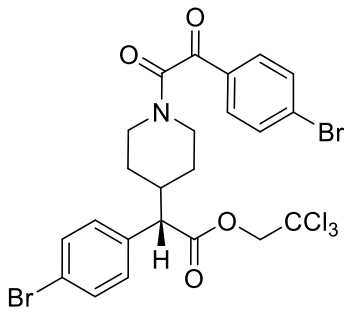

(13e)

7.81  
7.79  
7.77  
7.67  
7.65  
7.64  
7.50  
7.46  
7.45  
7.22  
7.21  
7.20  
4.80  
4.76  
4.74  
4.72  
4.71  
4.71  
4.70  
4.69  
4.68  
4.64  
4.61  
4.60  
4.59  
4.58  
4.58  
3.61  
3.59  
3.59  
3.49  
3.47  
3.46  
3.42  
3.41  
3.40  
3.39  
3.12  
3.12  
2.98  
2.98  
2.84  
2.84  
2.71  
2.70  
2.36  
2.35  
2.34  
2.34  
2.33  
2.05  
2.05  
1.90  
1.88  
1.67  
1.46  
1.45  
1.38  
1.37  
1.35  
1.33  
1.33  
1.31  
1.31  
1.30  
1.13  
1.13  
1.05

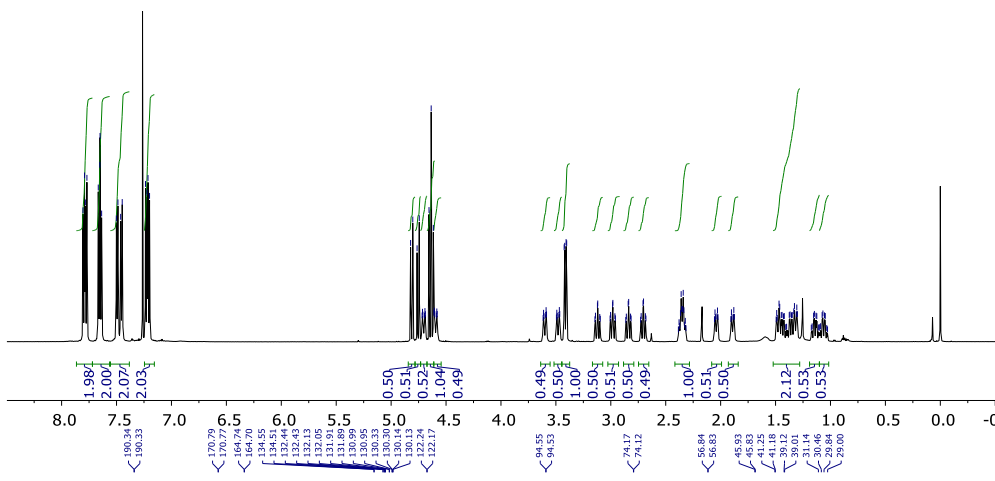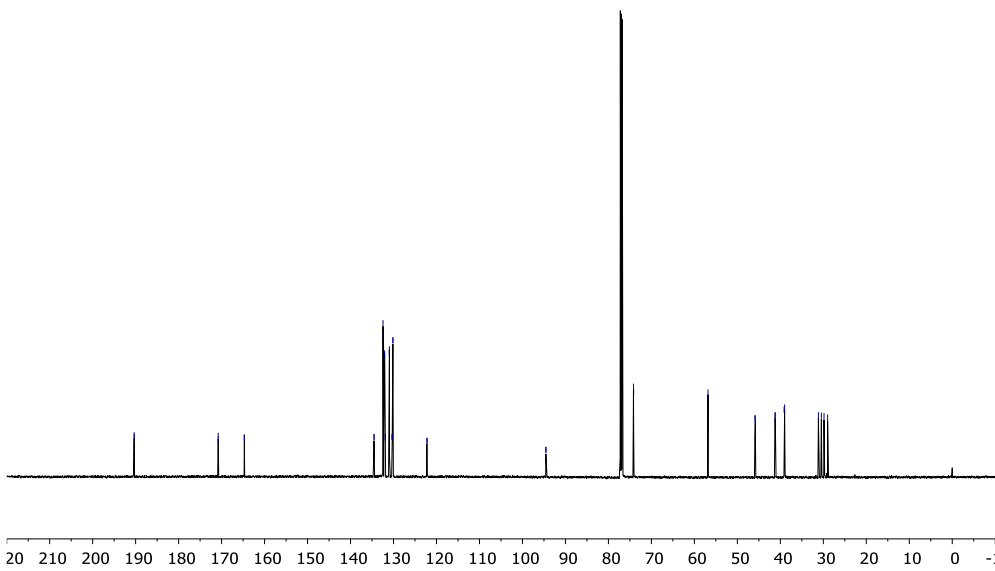

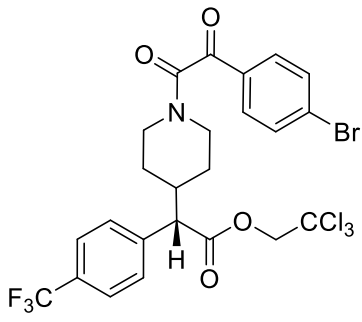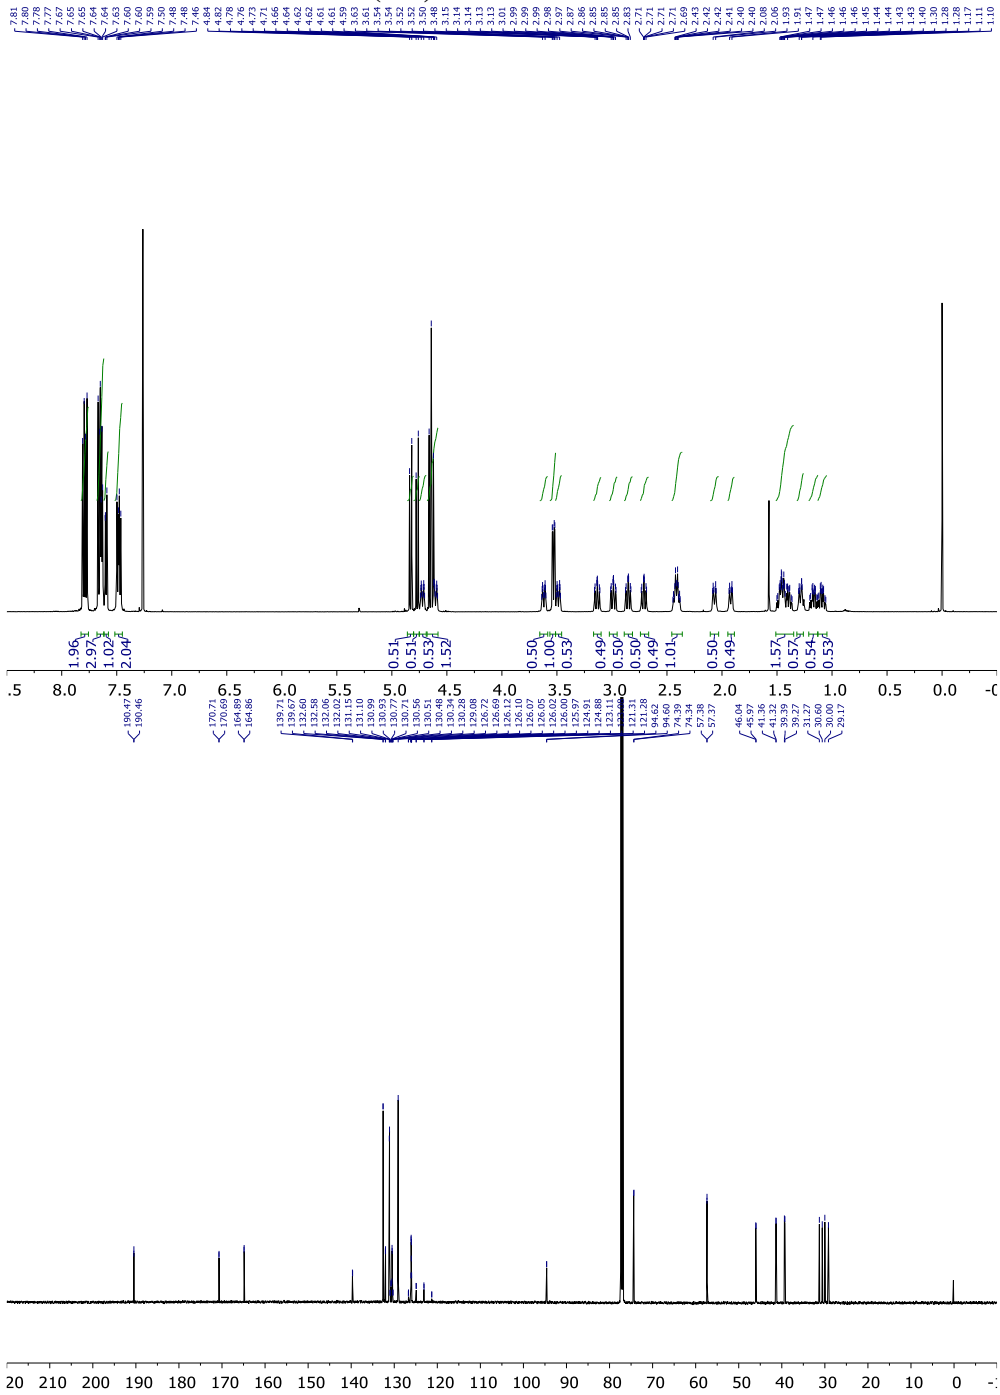

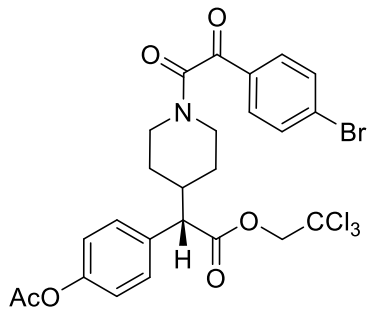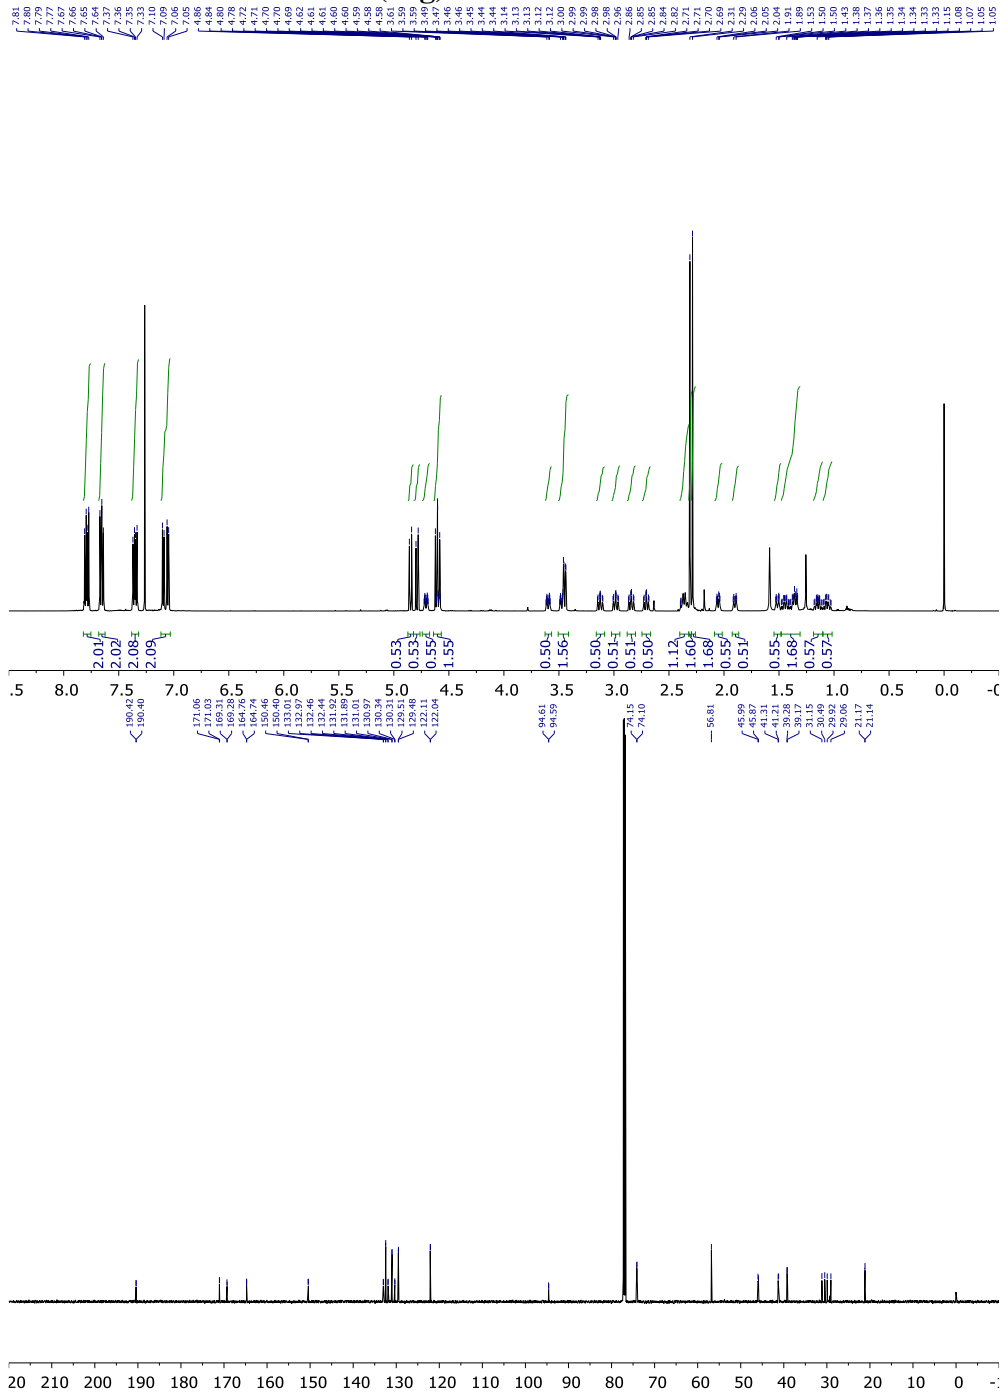

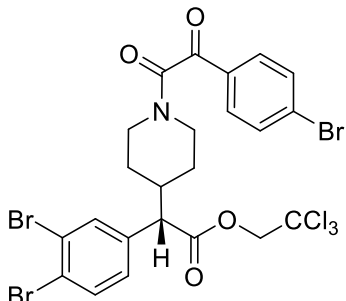

(13h)

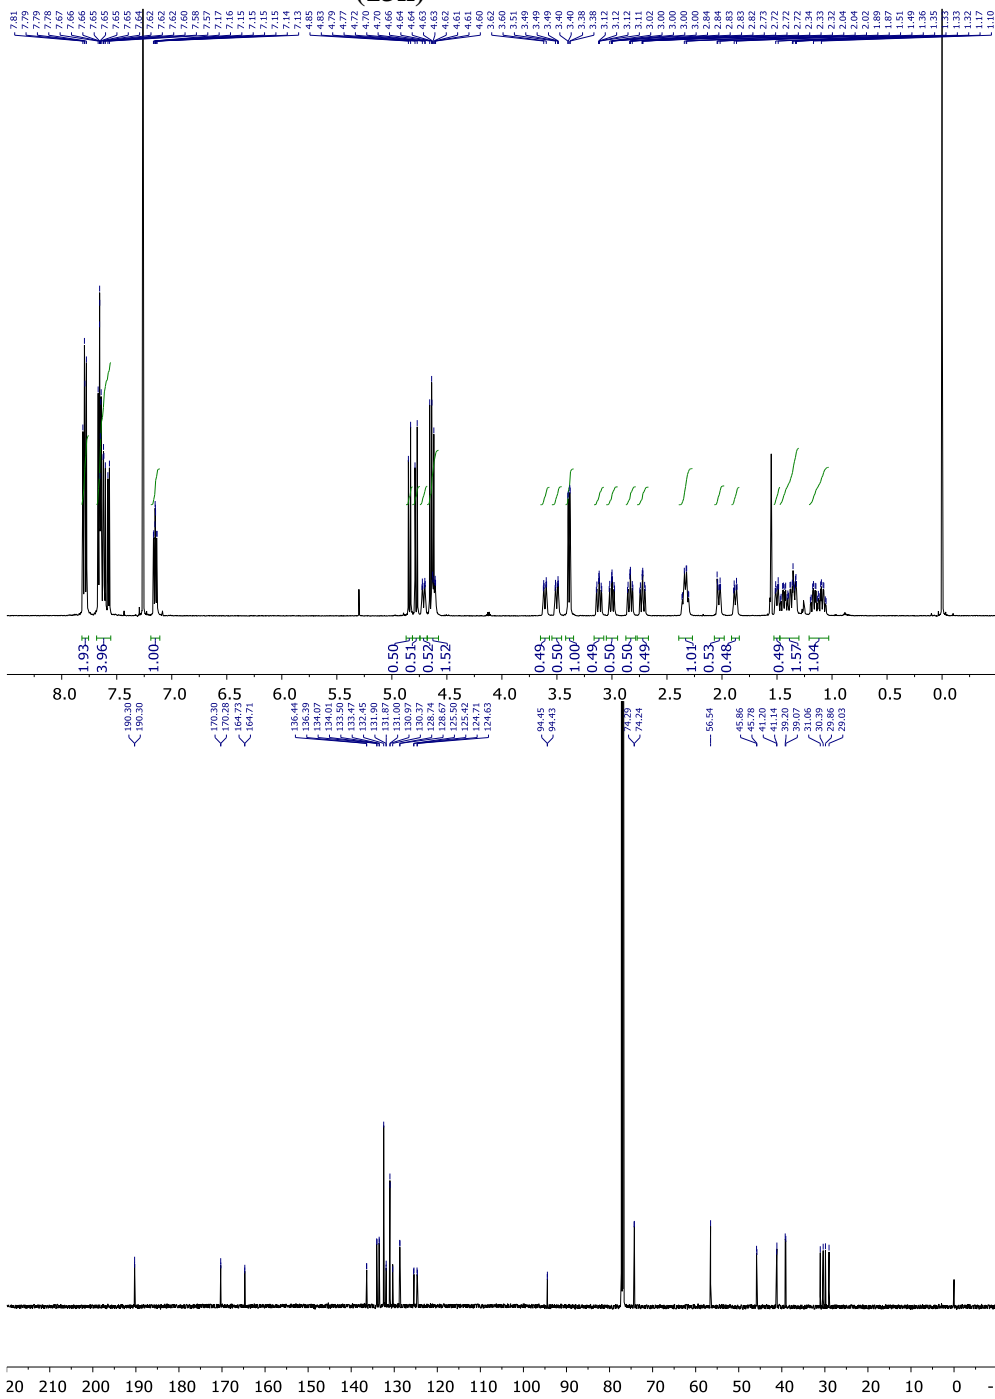

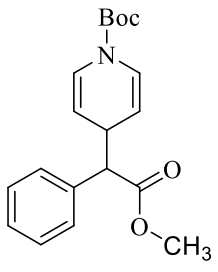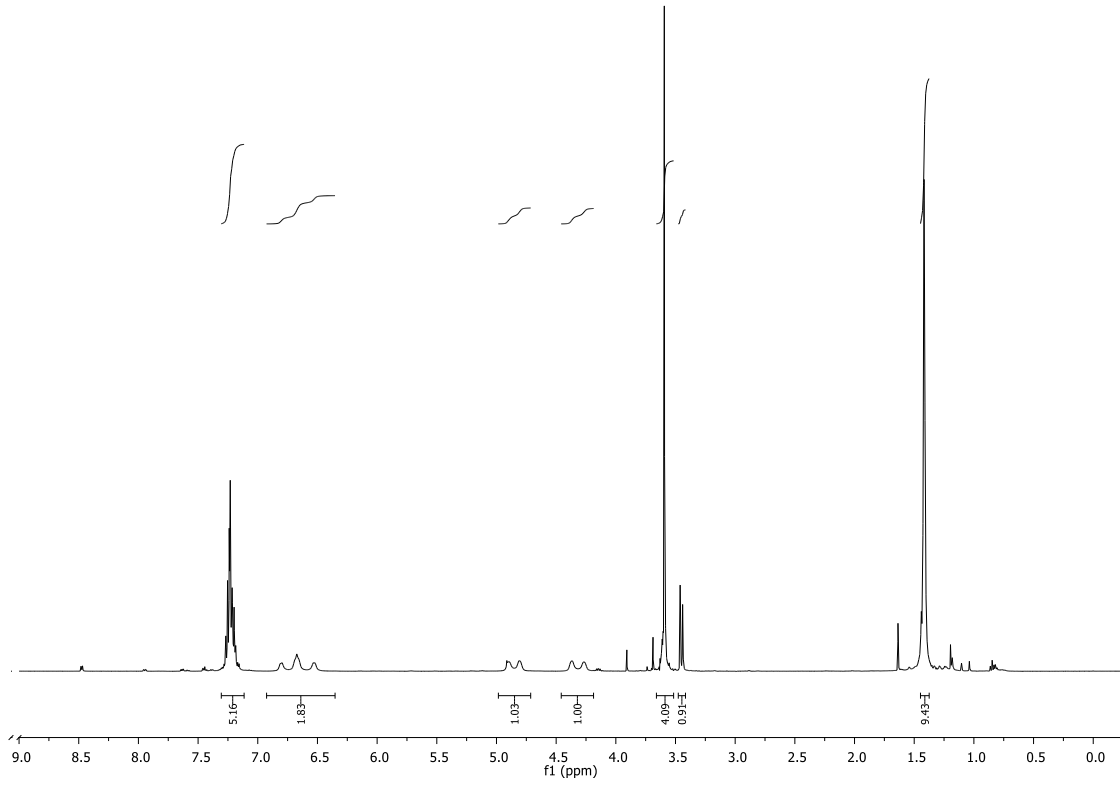

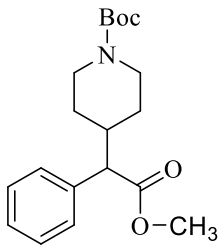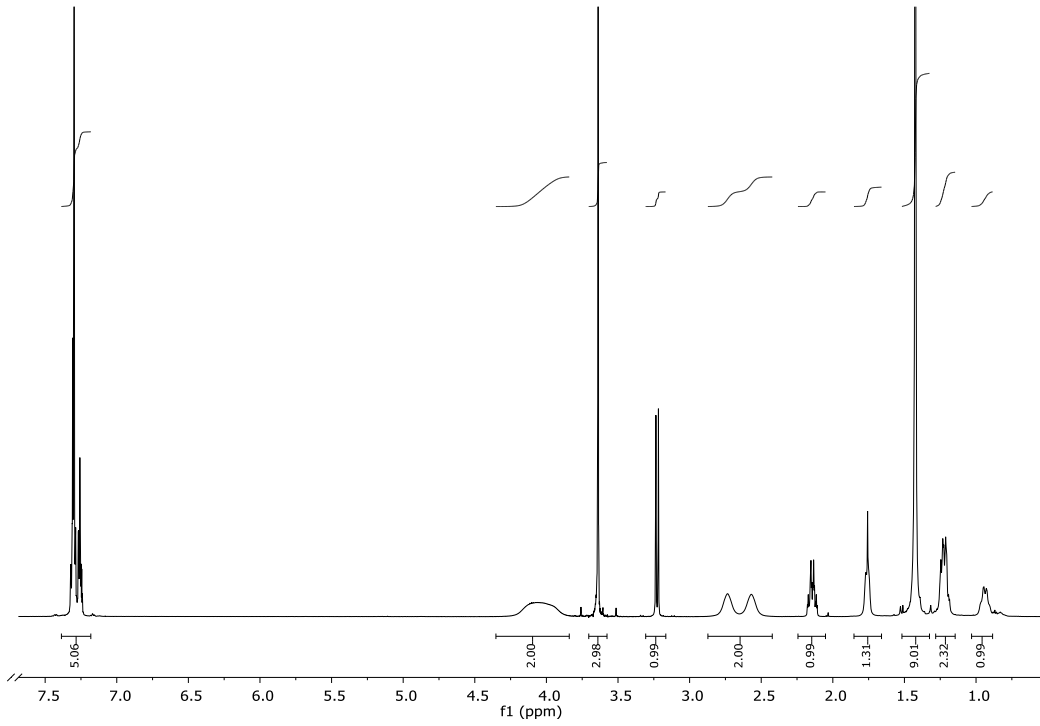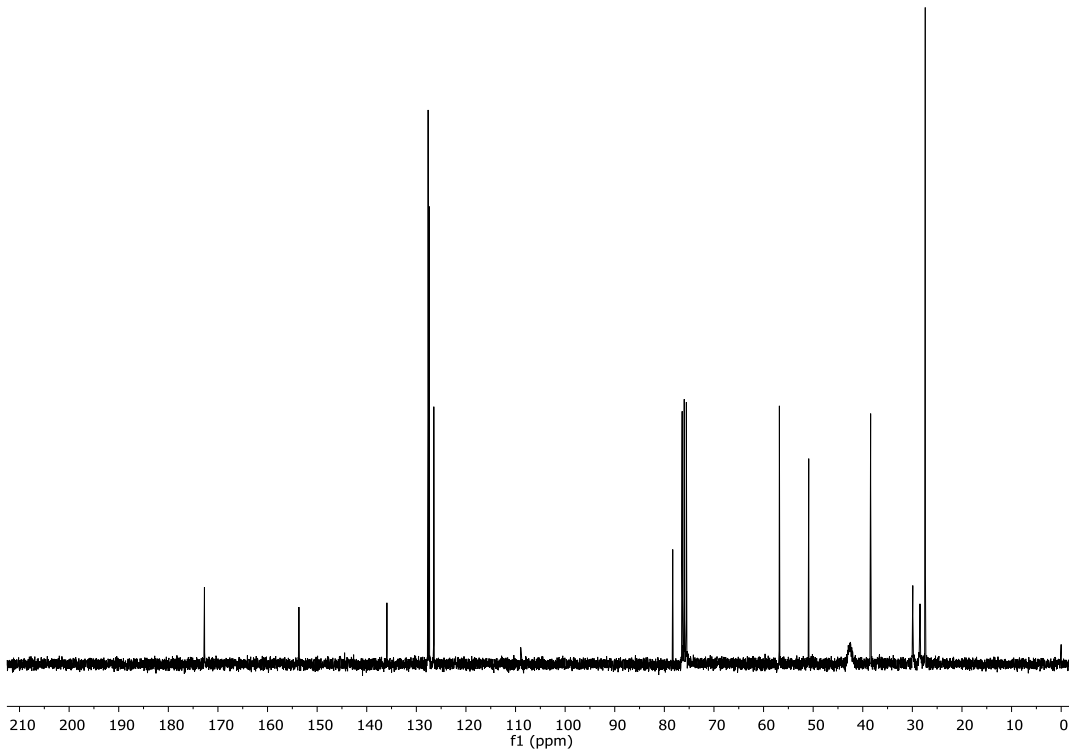

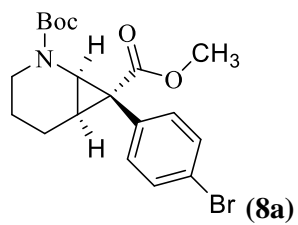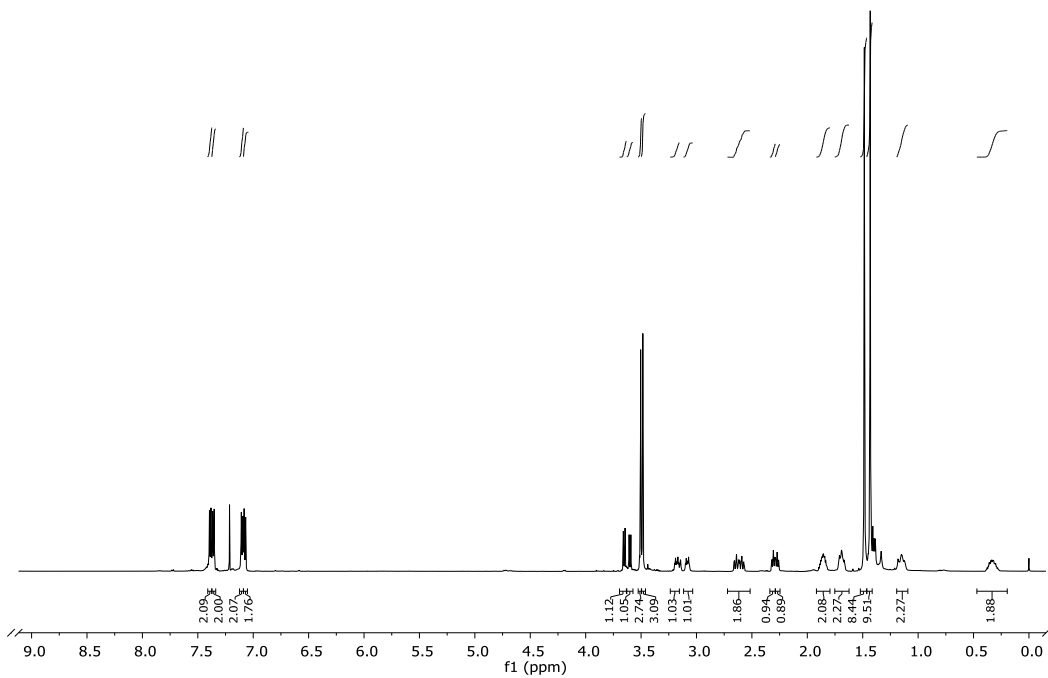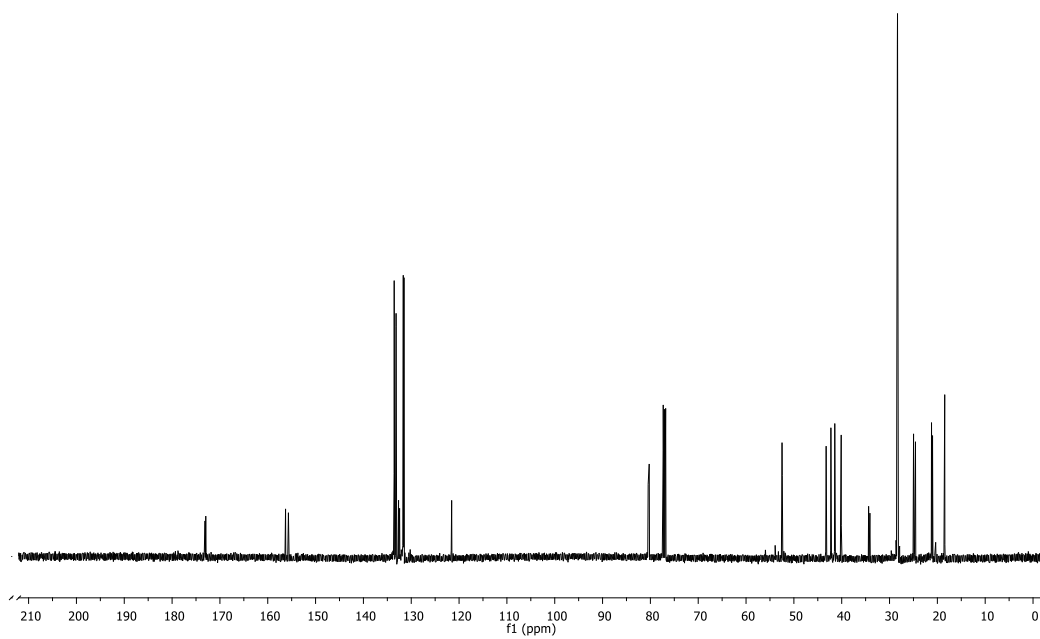

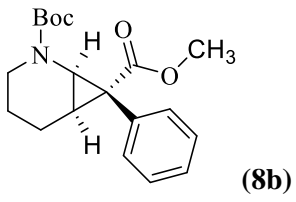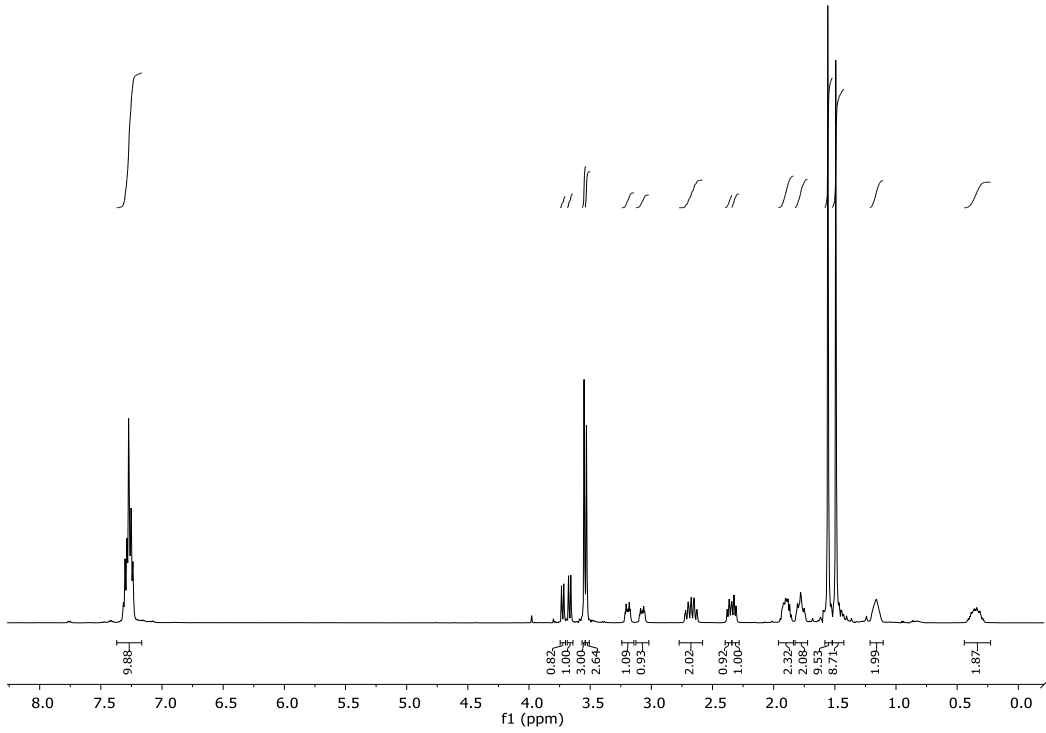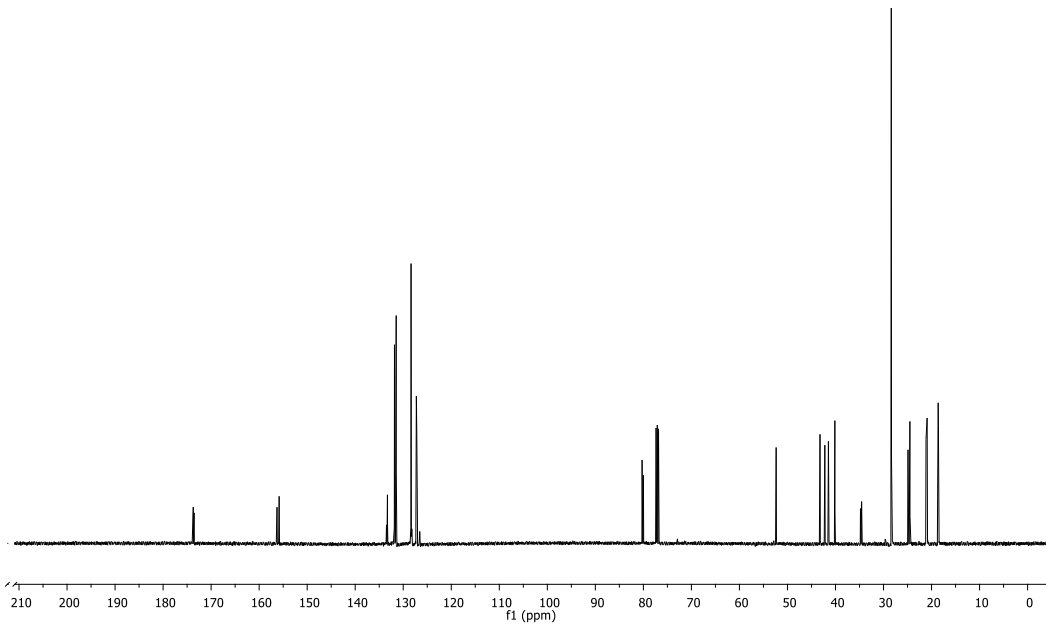



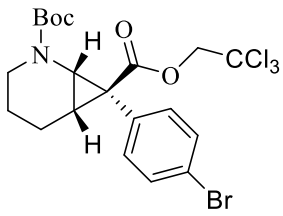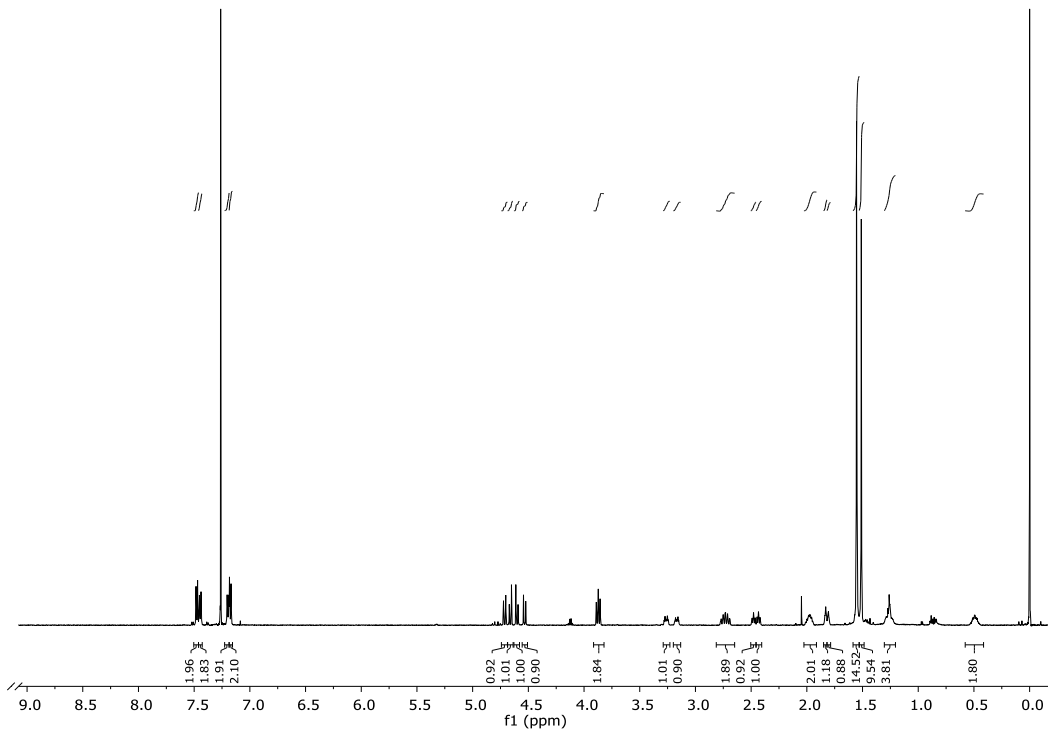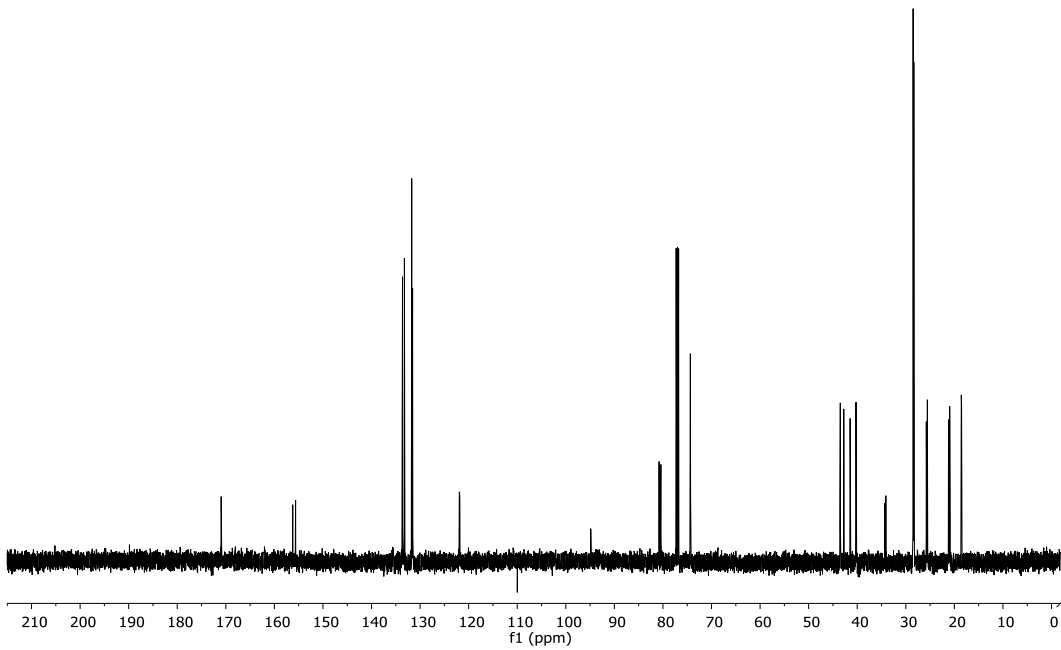

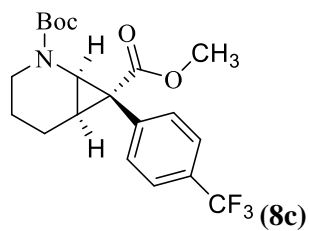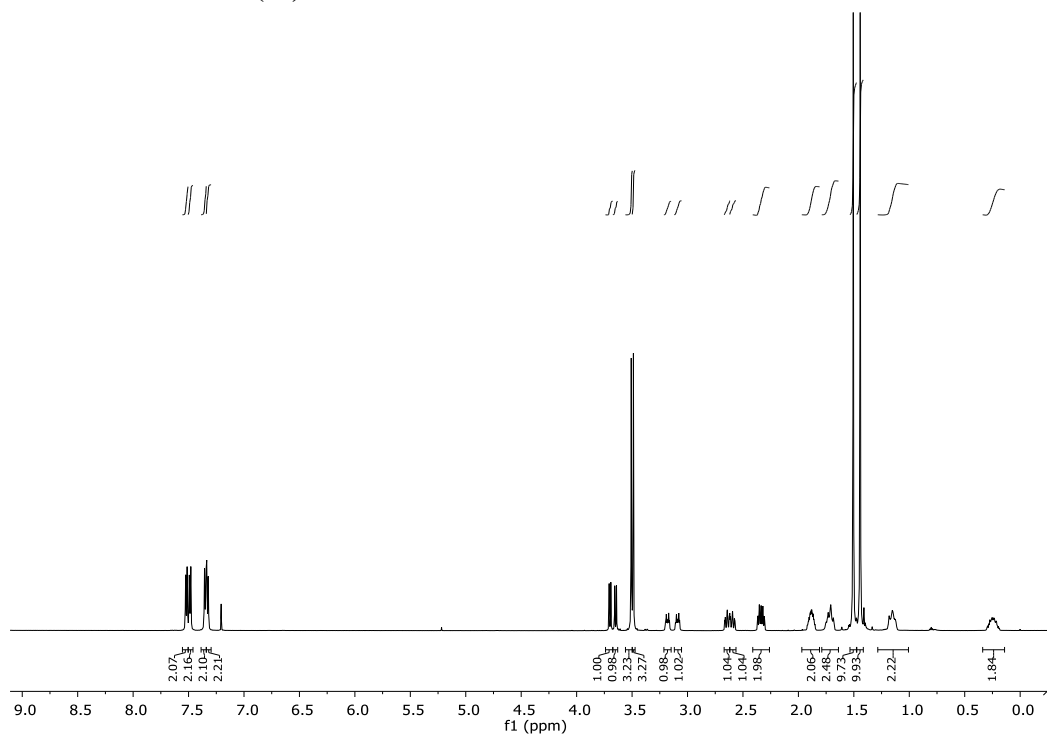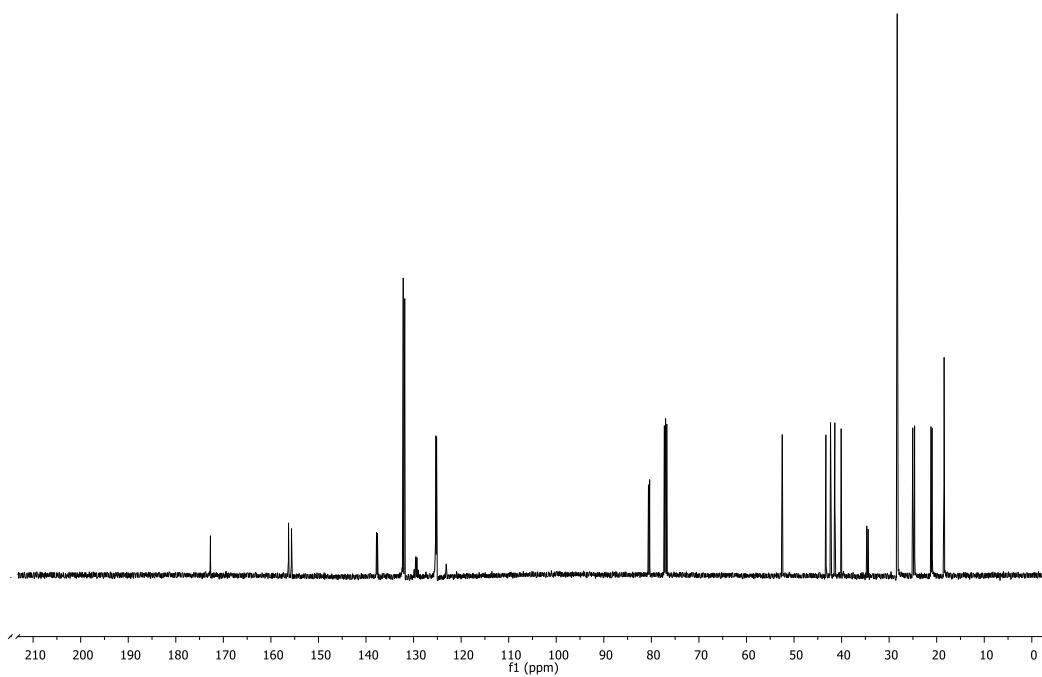

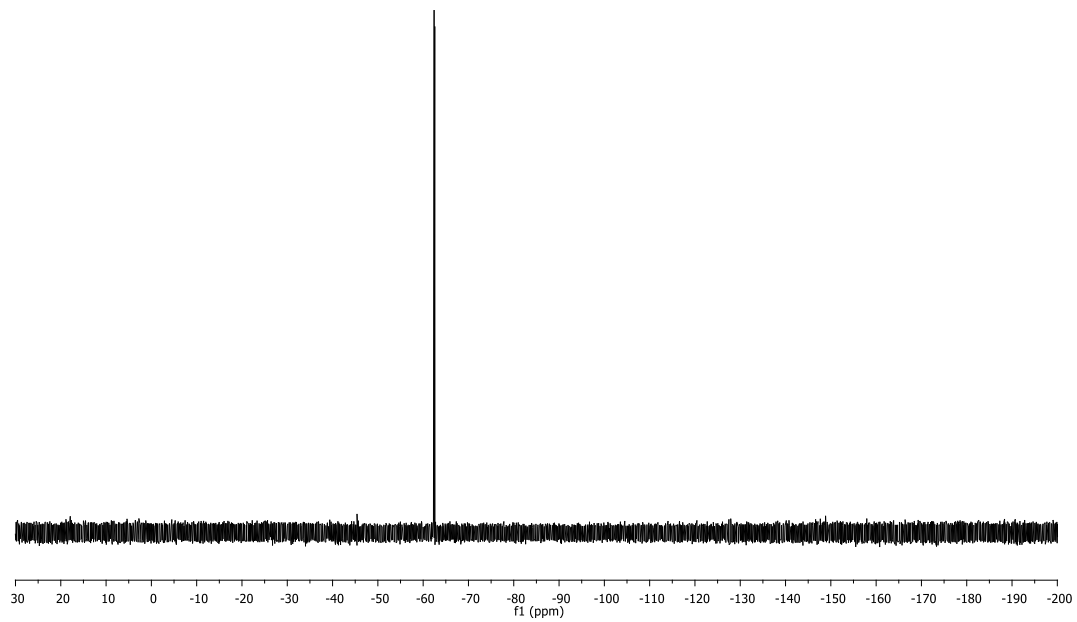

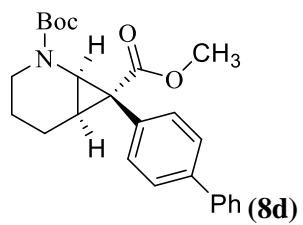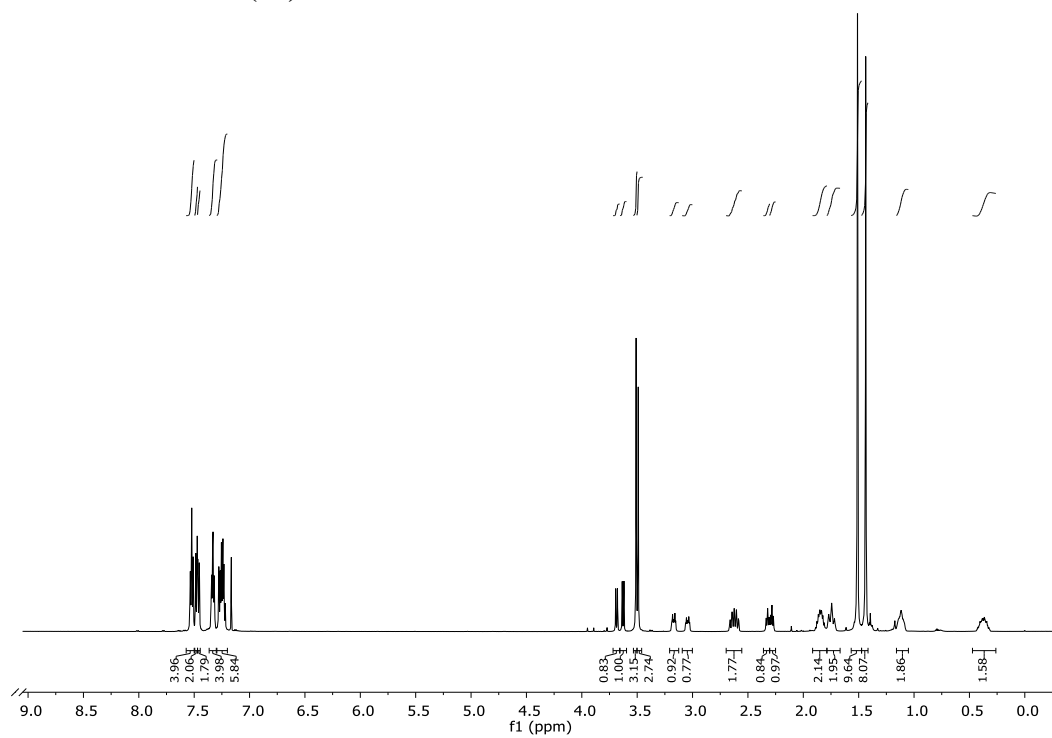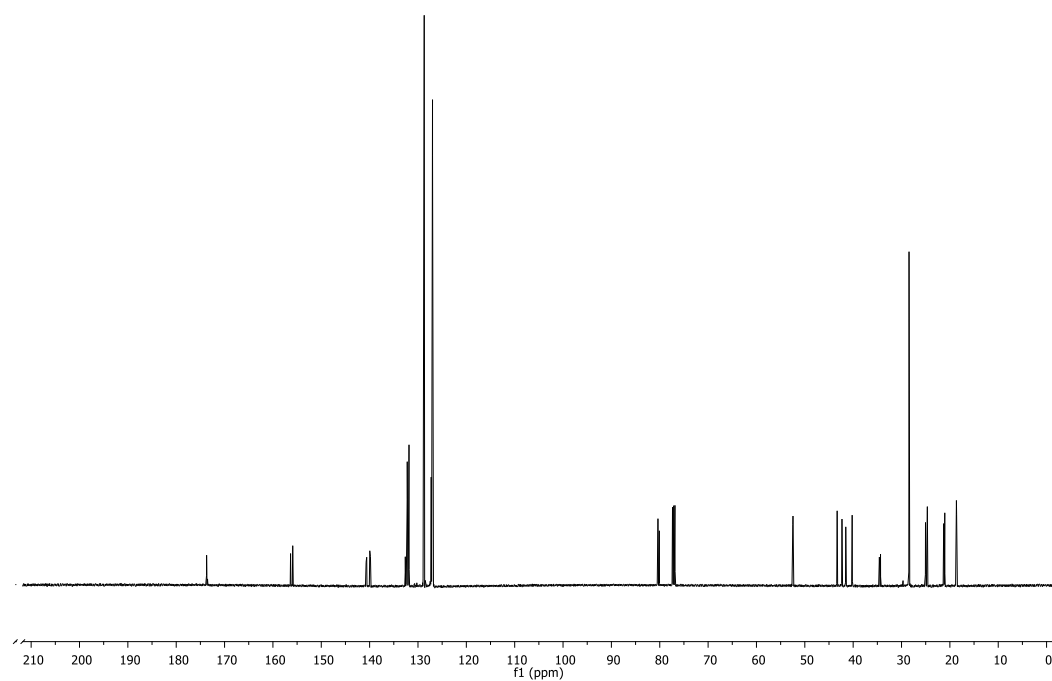

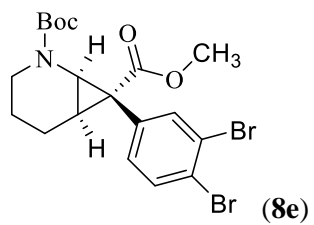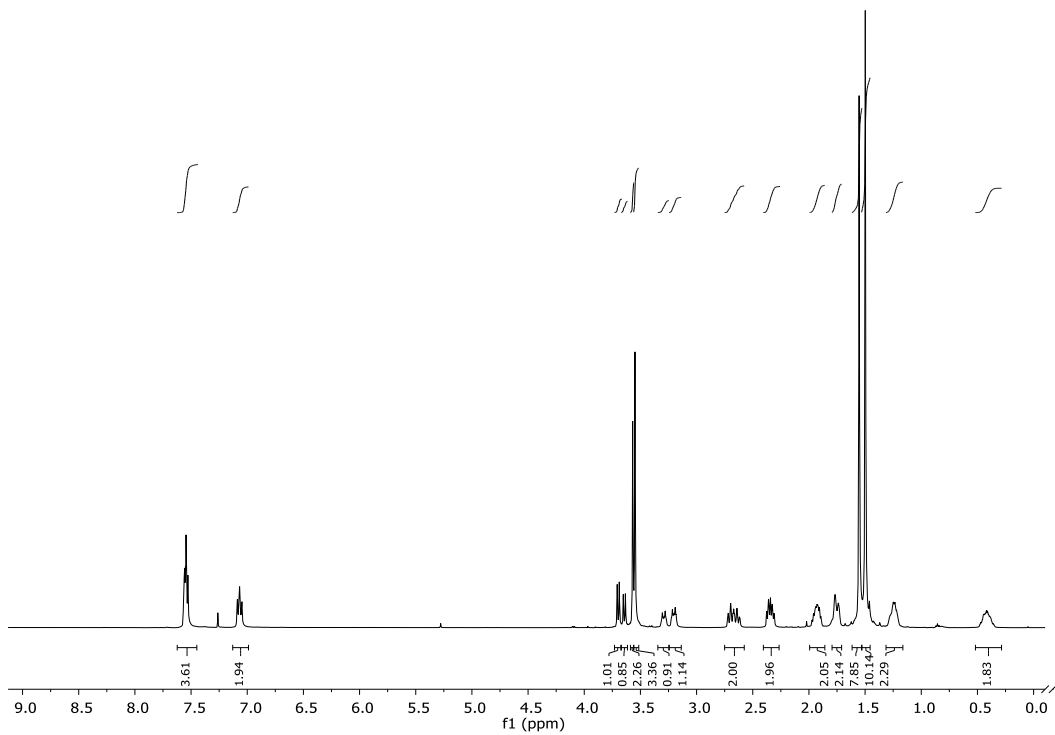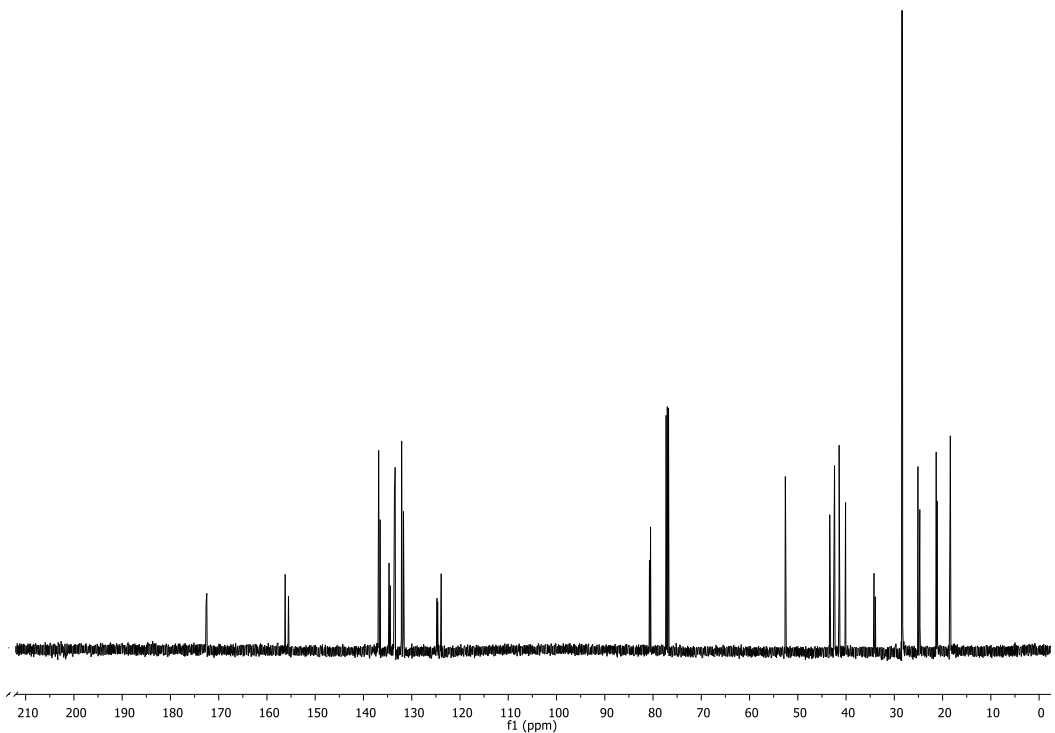

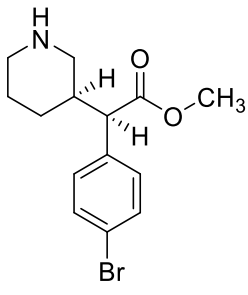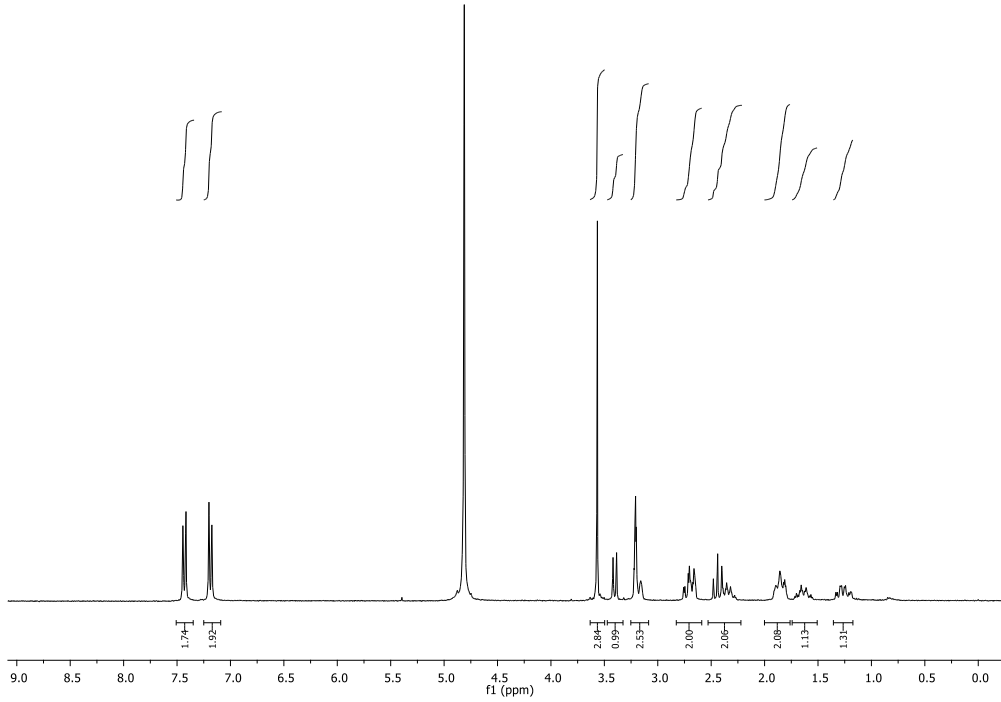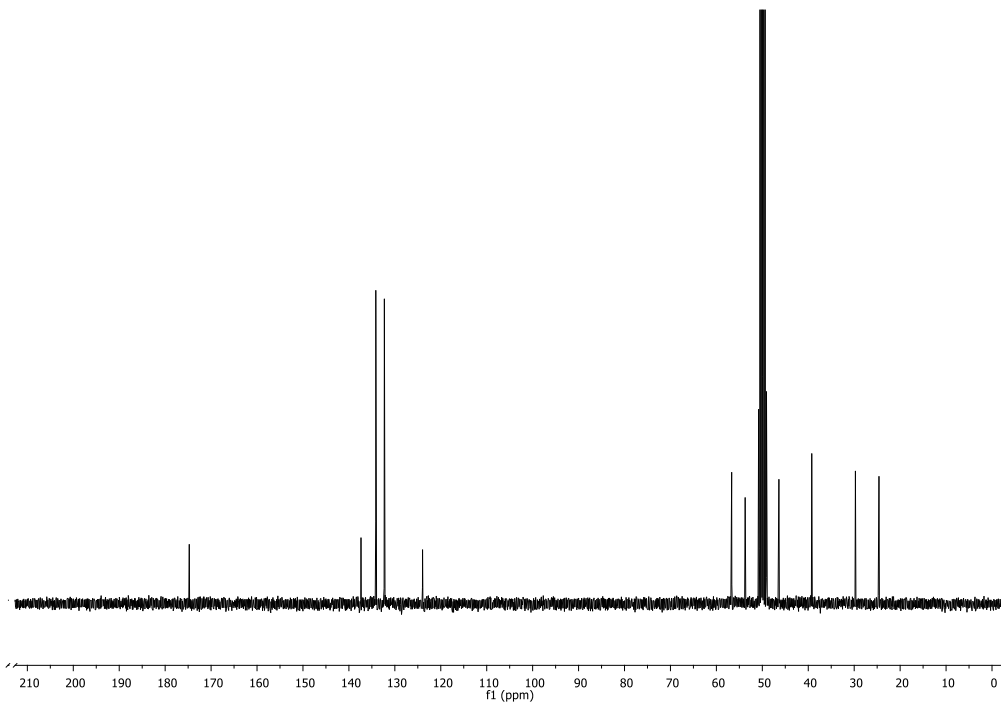

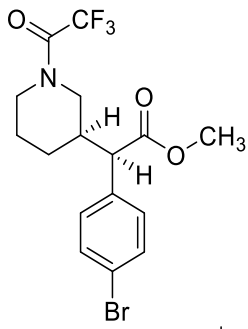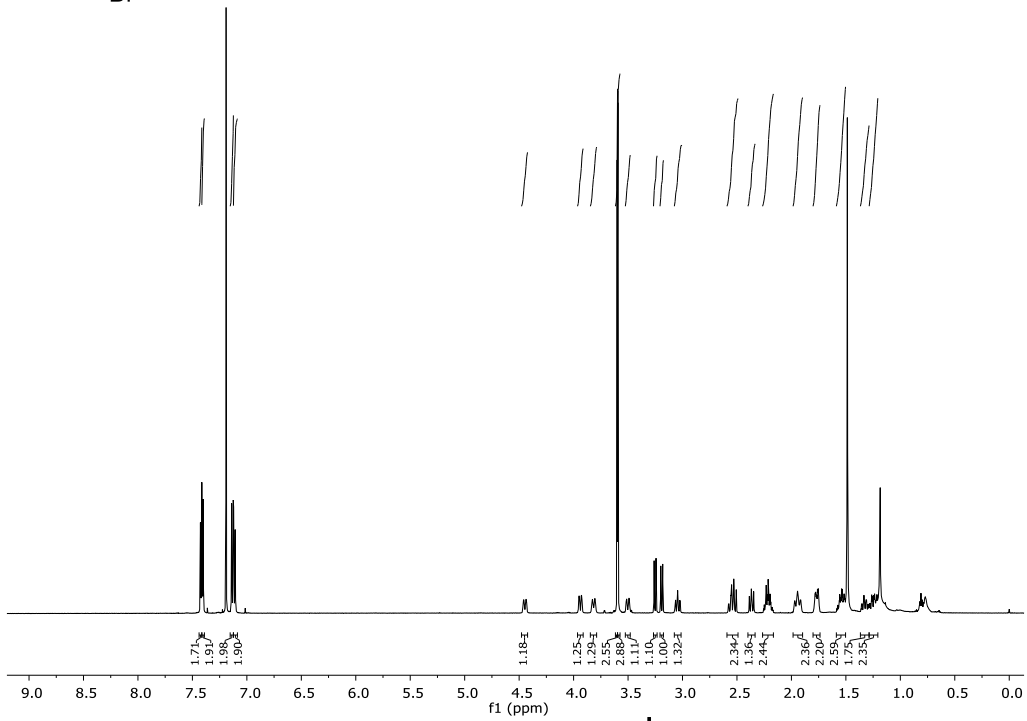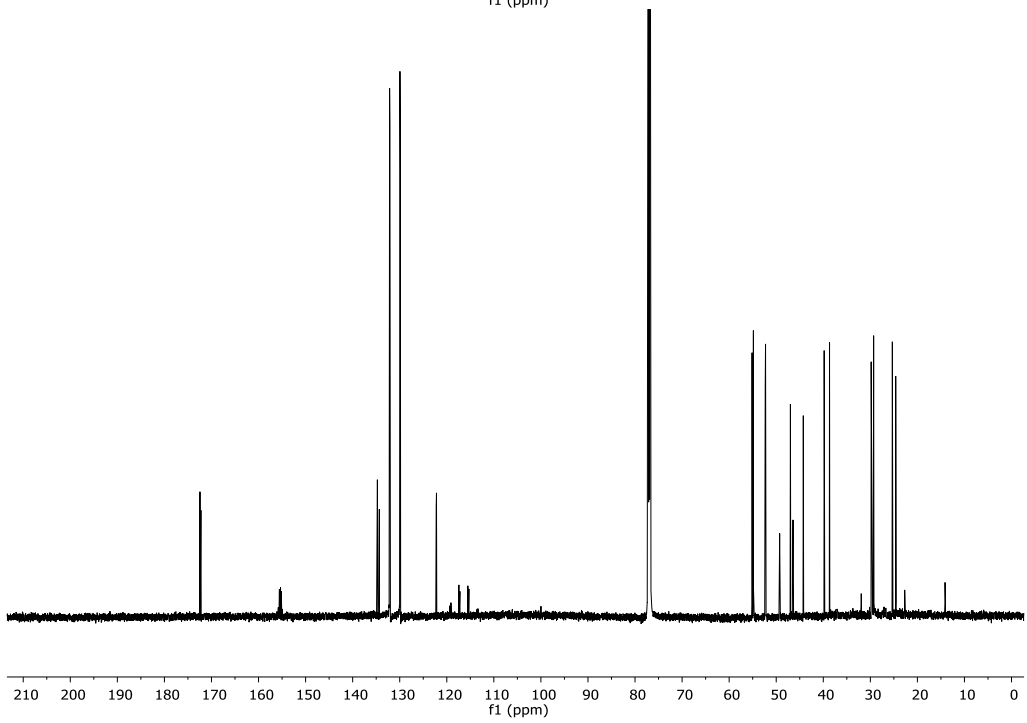

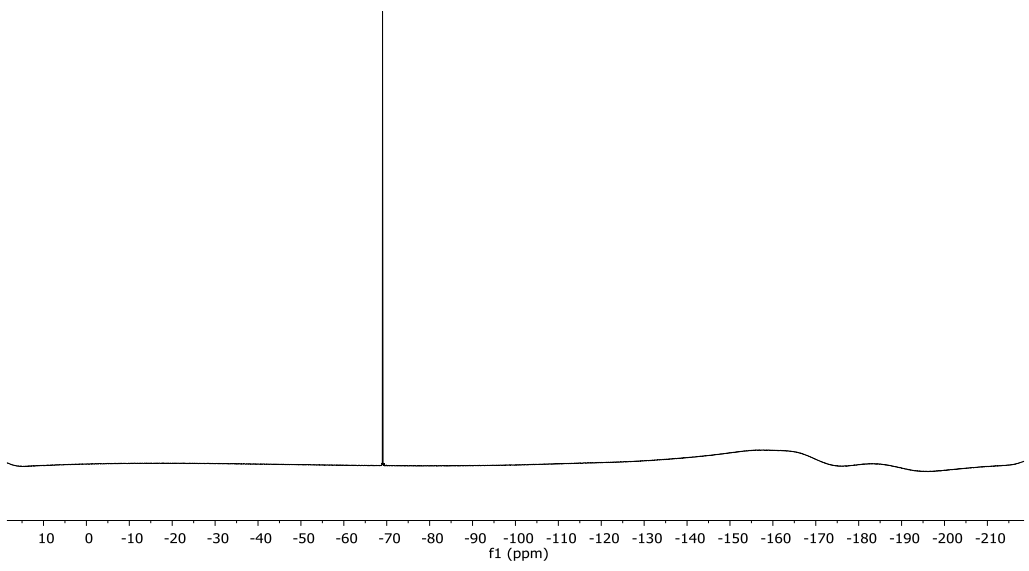



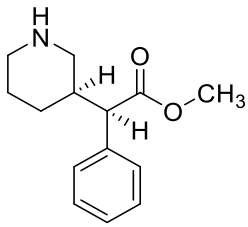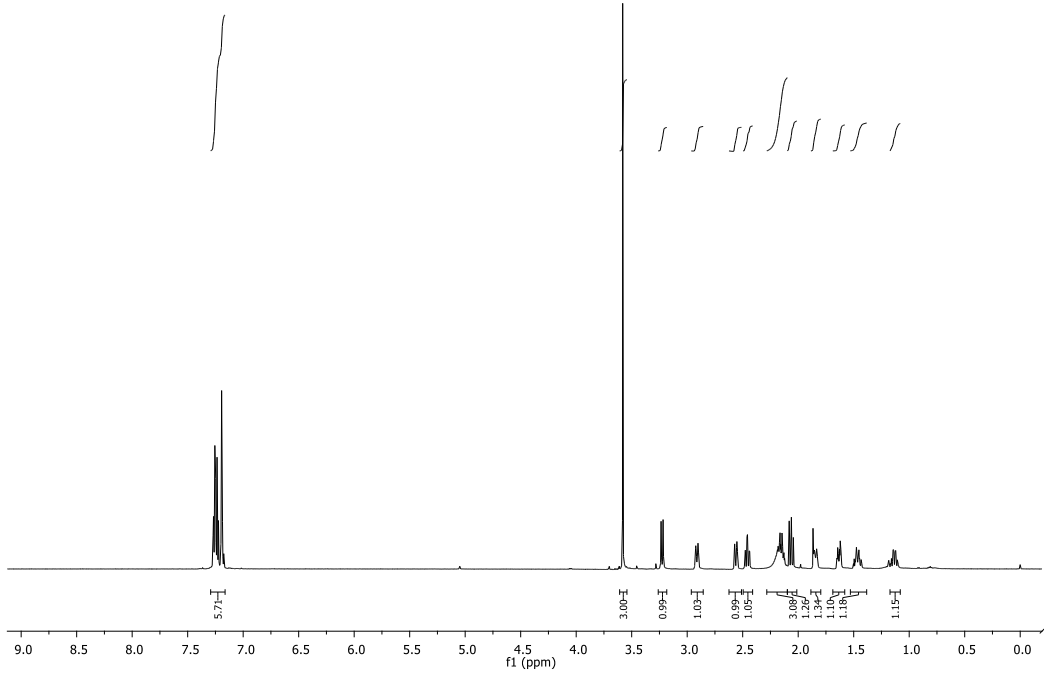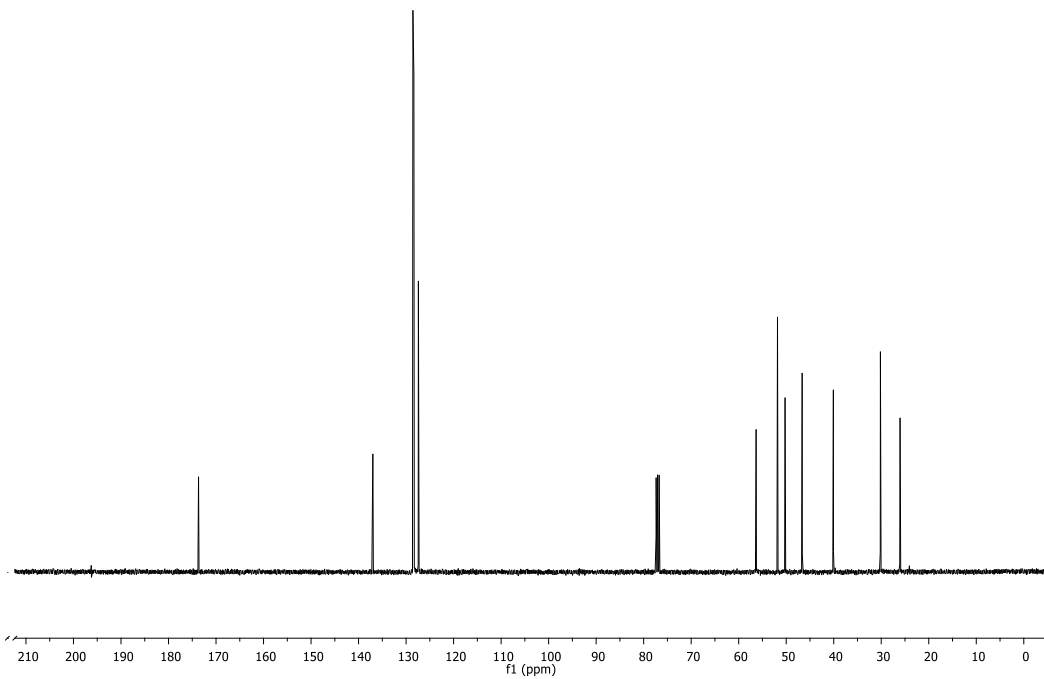

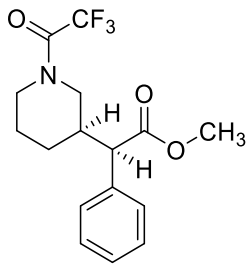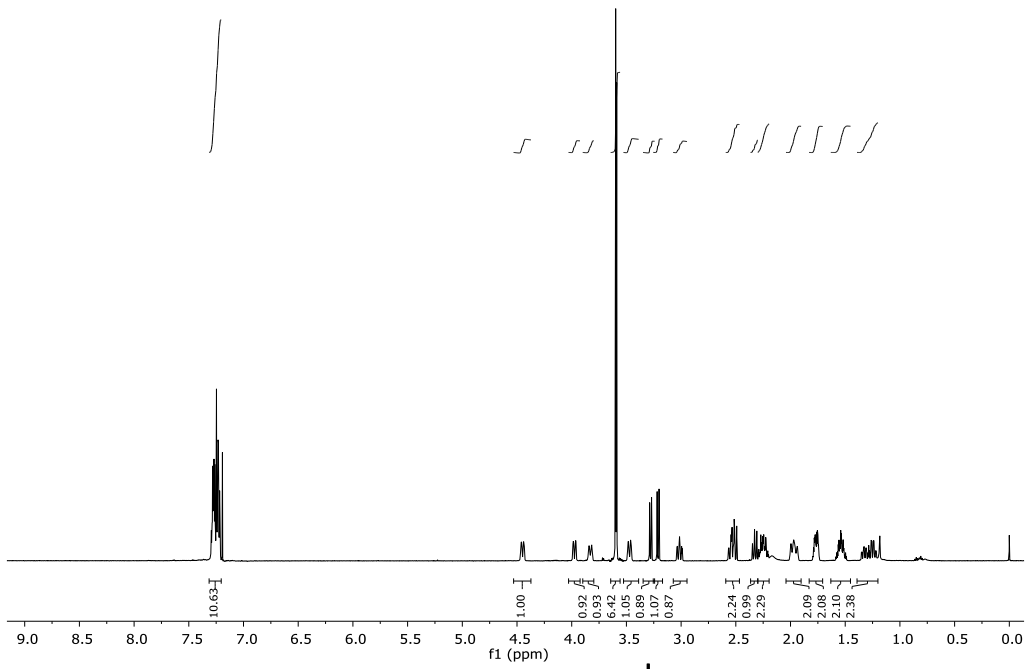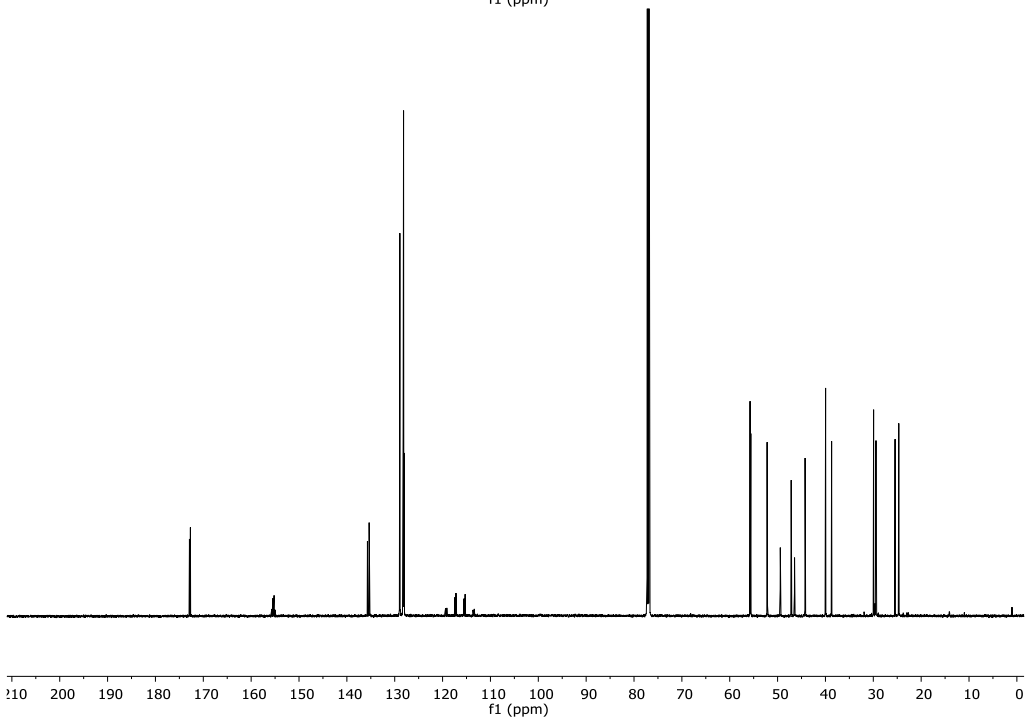

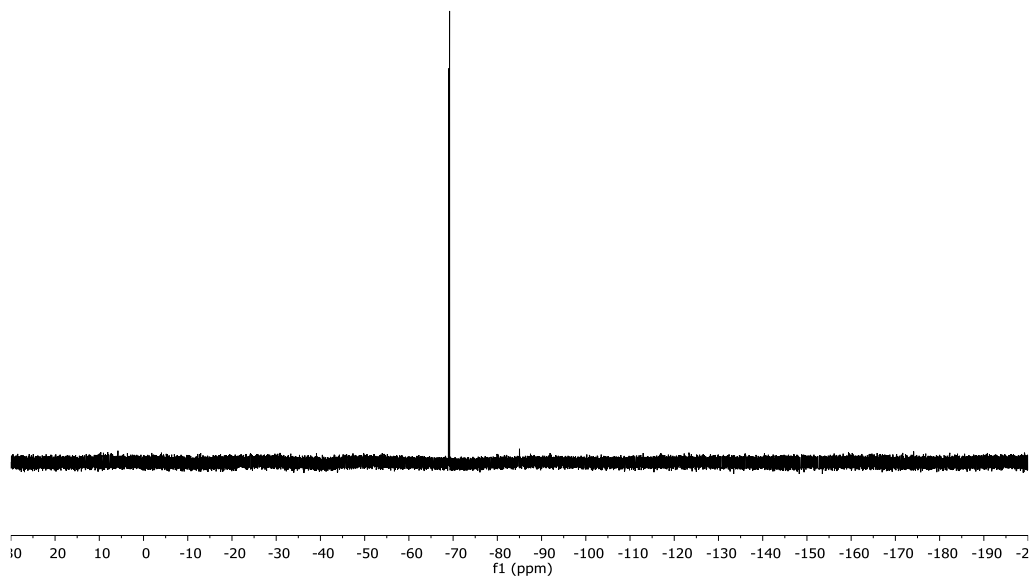

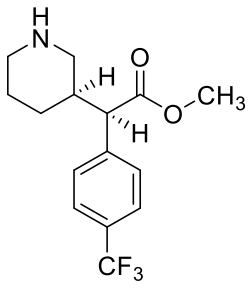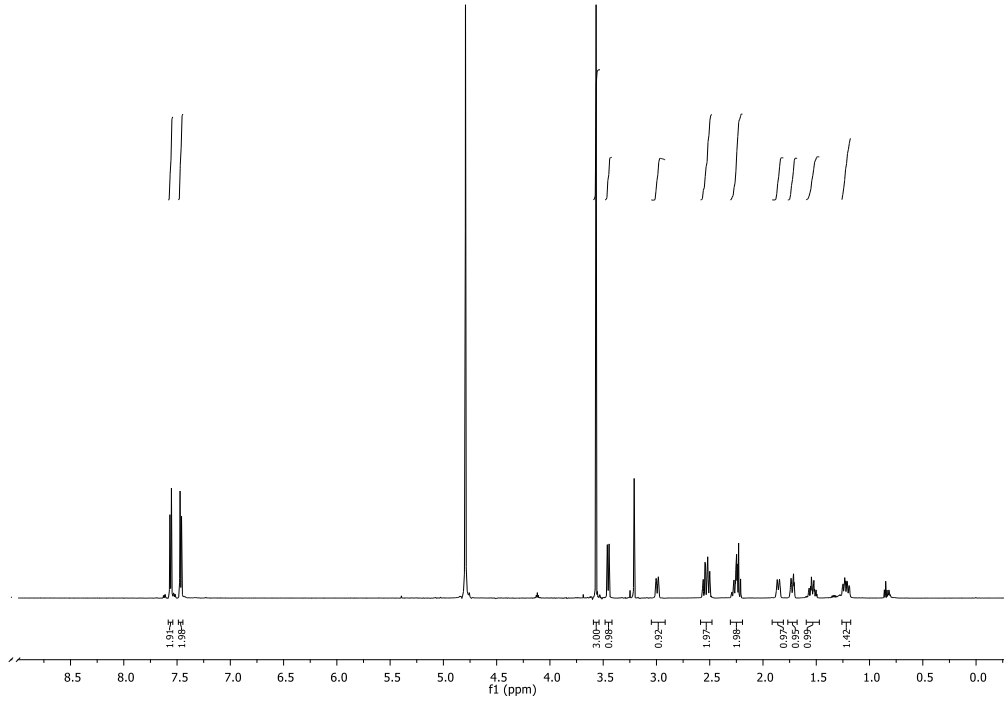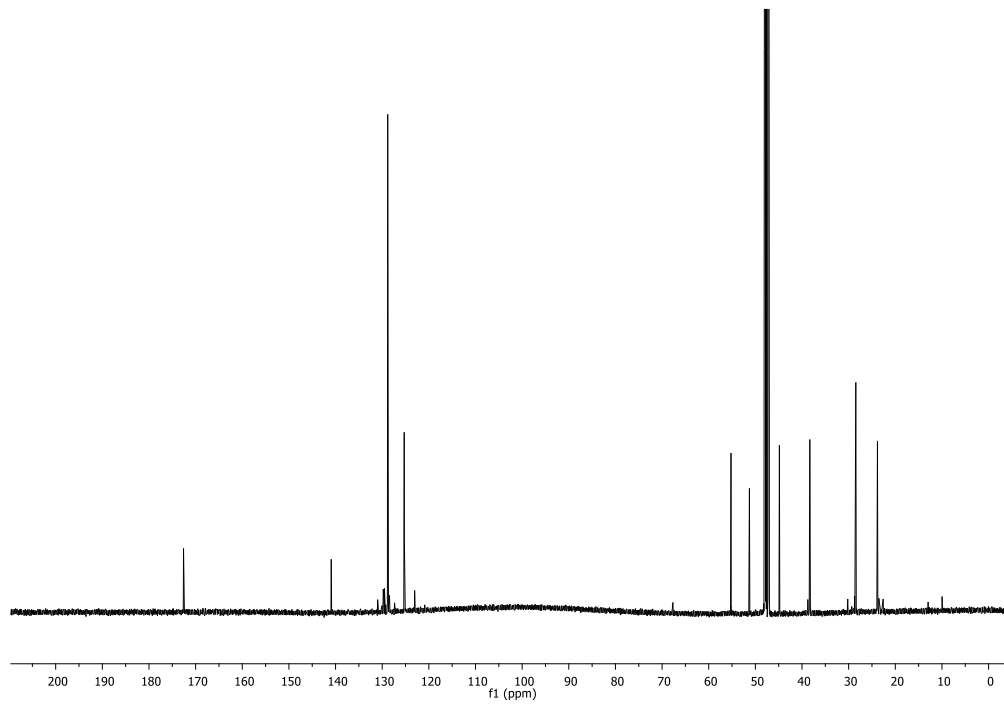

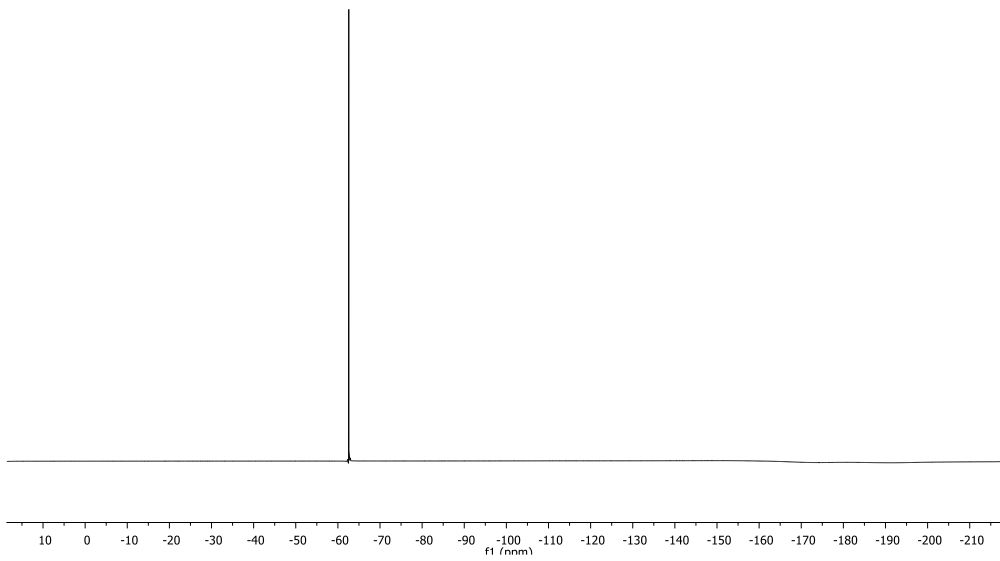

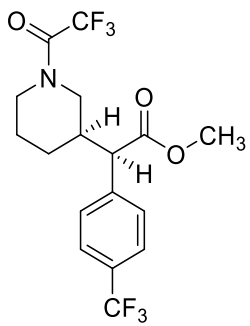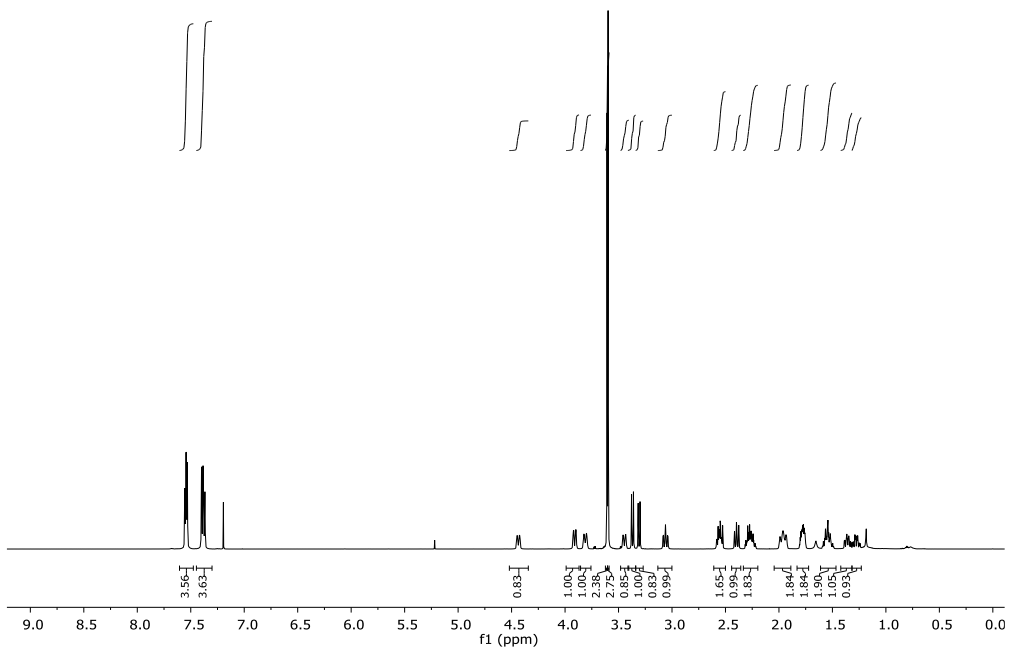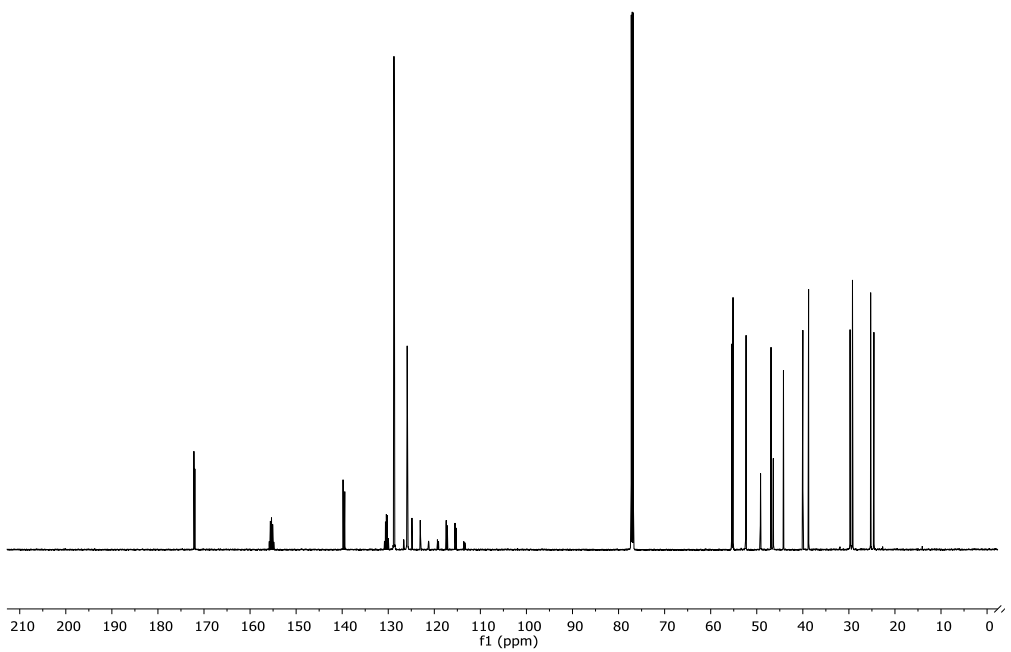

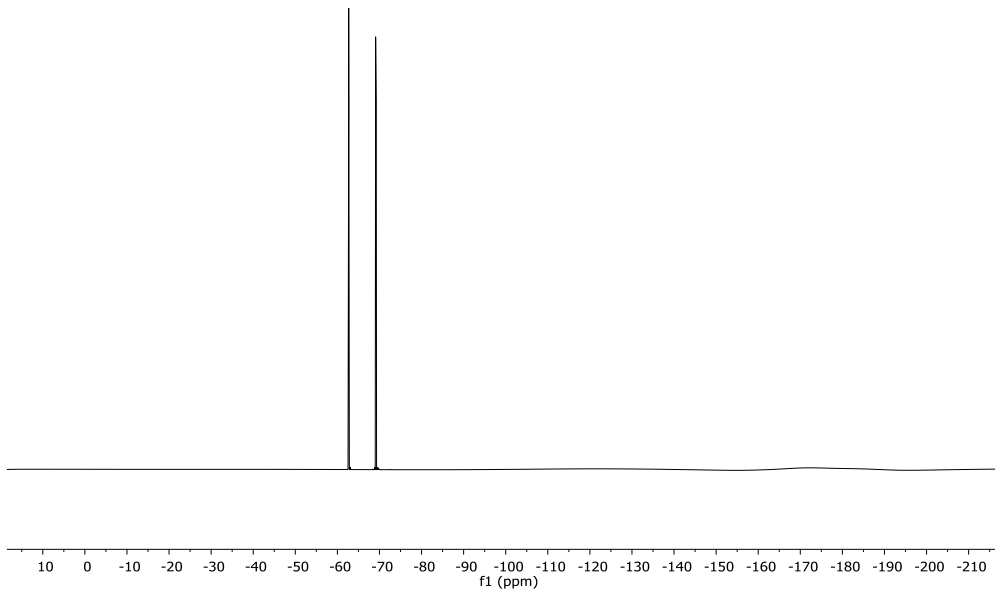

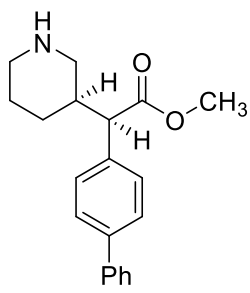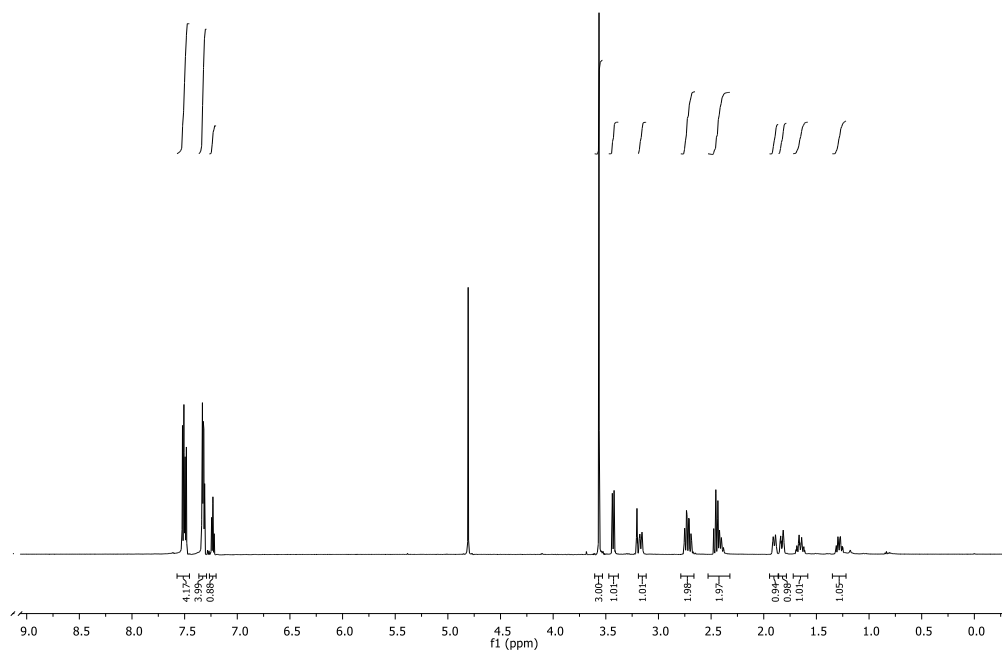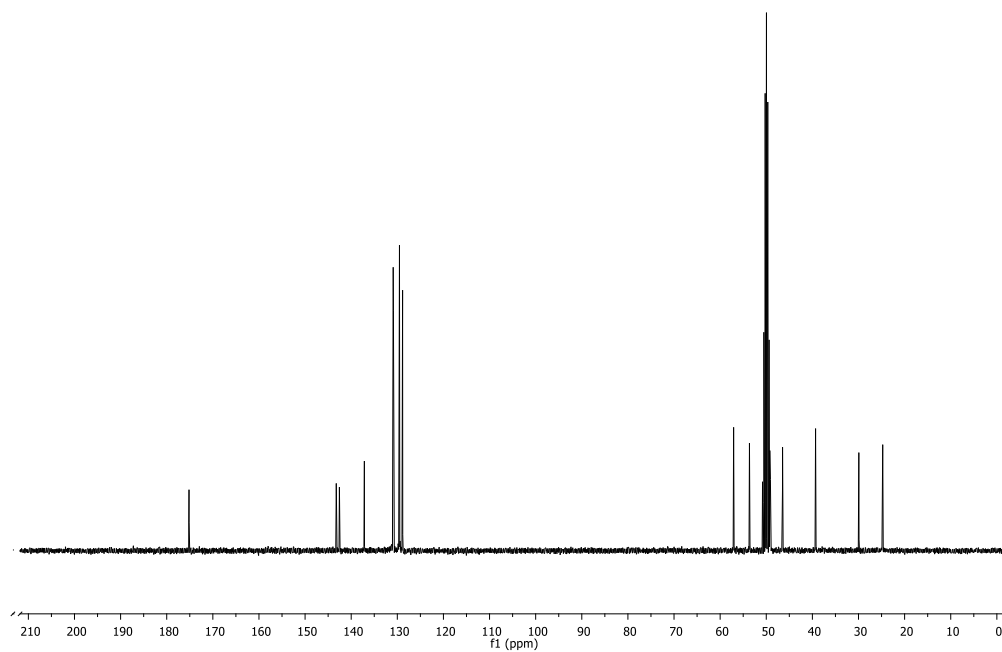



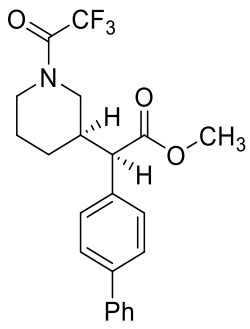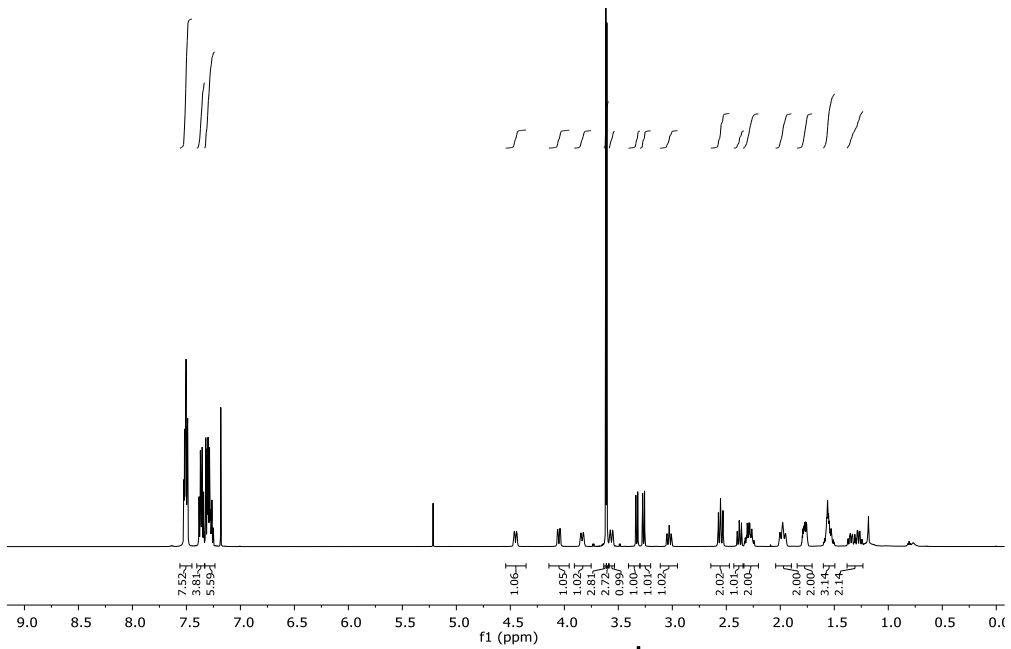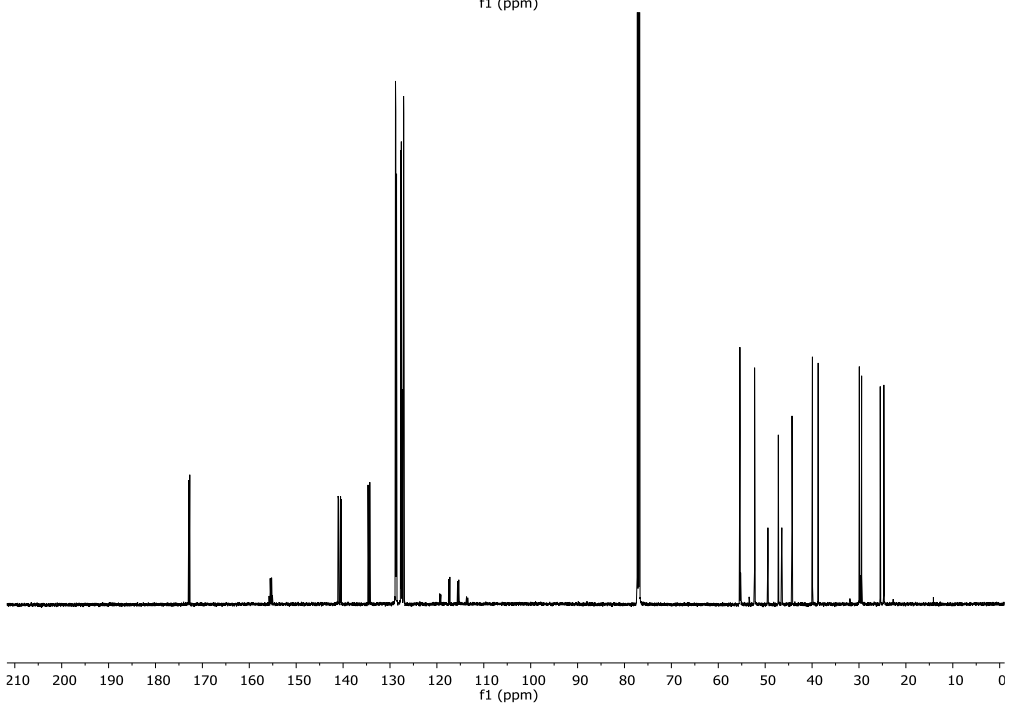

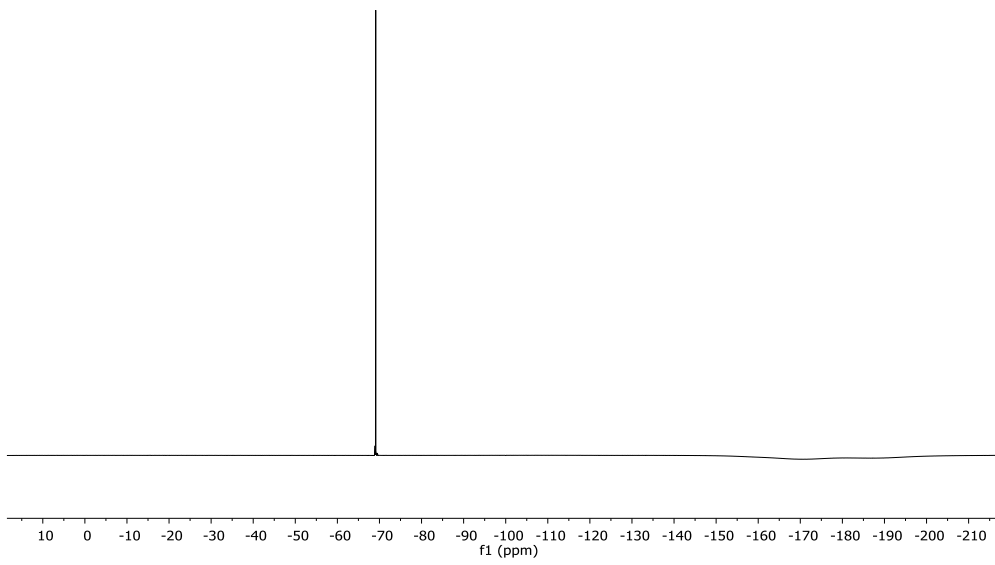

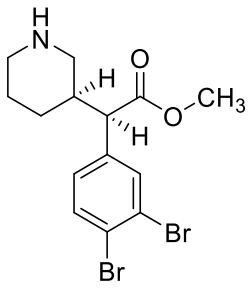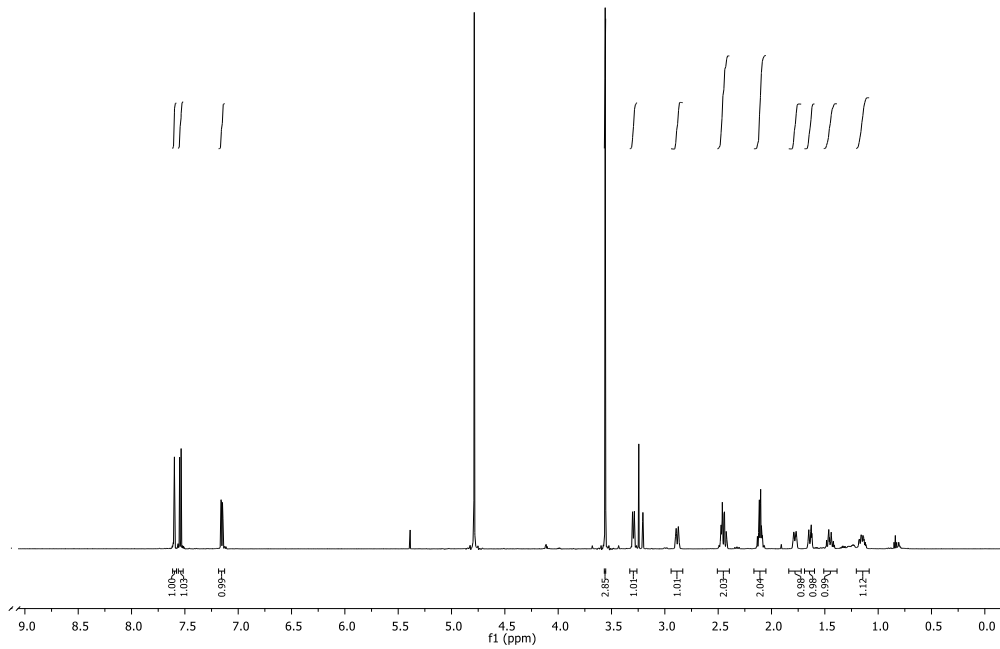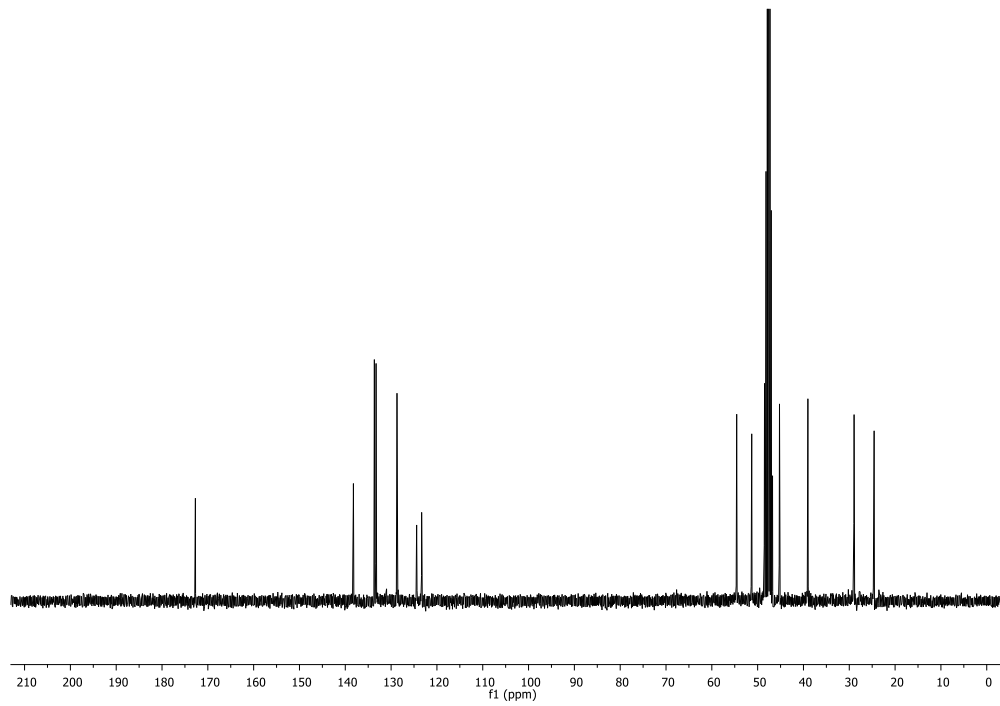

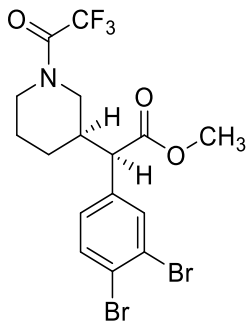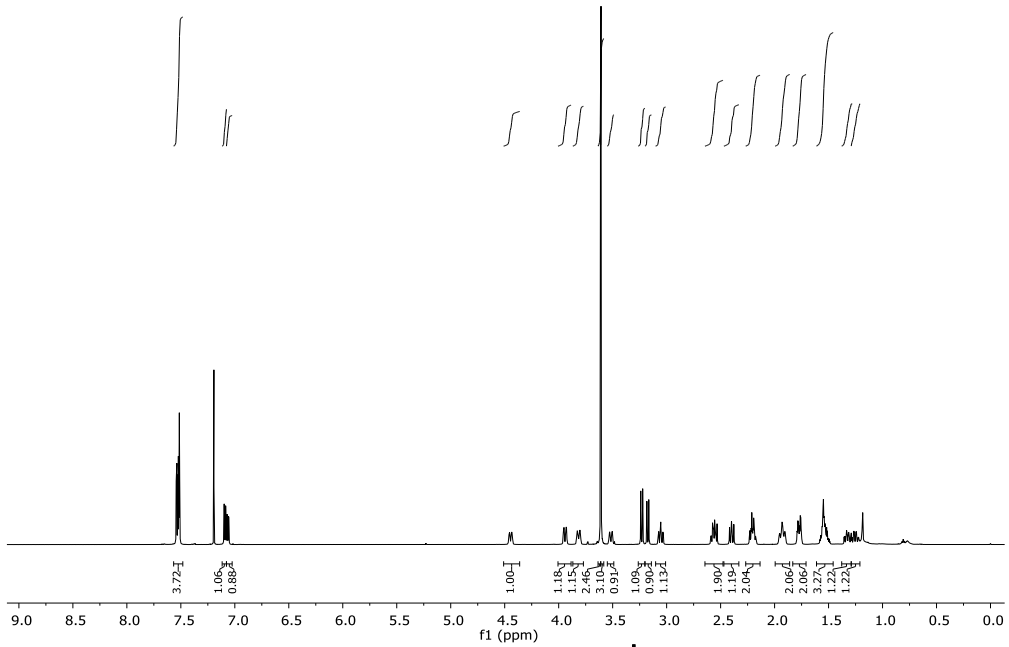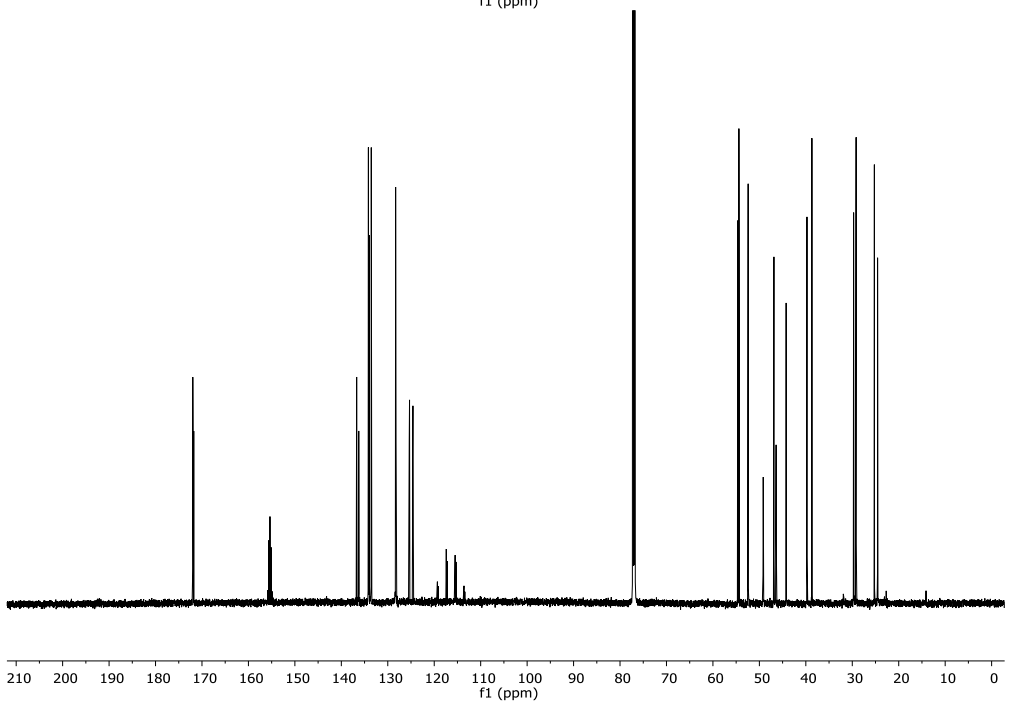

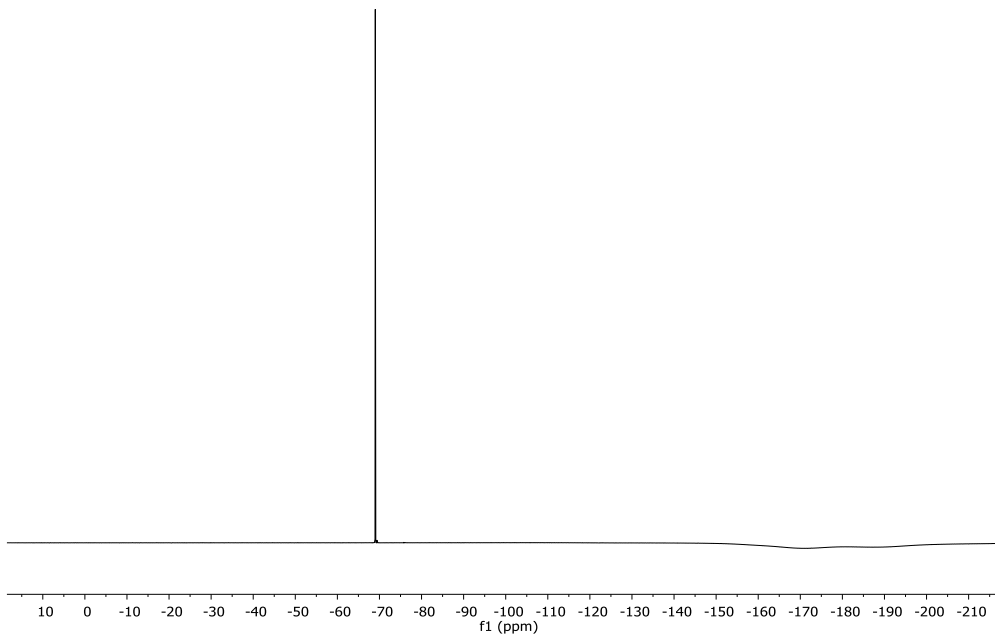

## 9. HPLC Spectra for Enantioselectivity Determination

### 10.1. C2 Functionalization Products

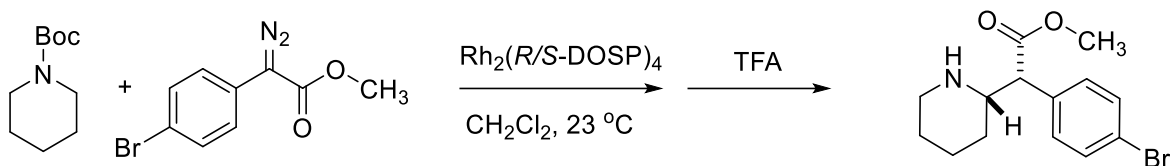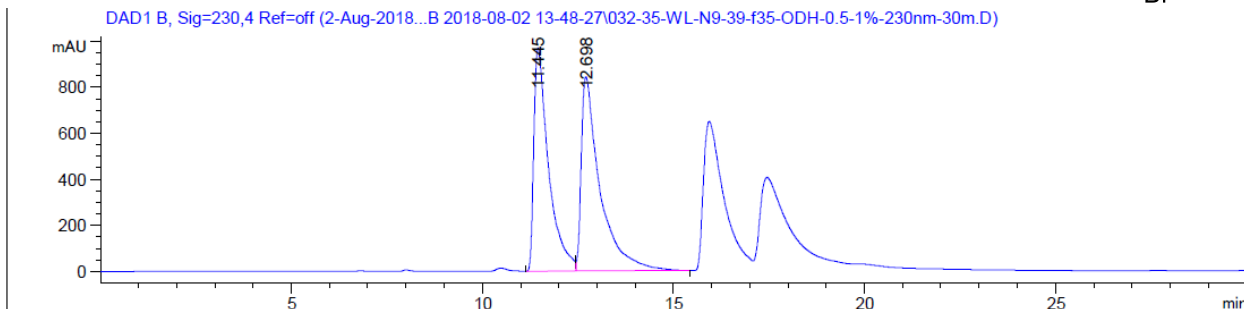

Signal 2: DAD1 B, Sig=230,4 Ref=off

| Peak # | RetTime [min] | Type | Width [min] | Area [mAU*s] | Height [mAU] | Area %  |
|--------|---------------|------|-------------|--------------|--------------|---------|
| 1      | 11.445        | BV   | 0.3759      | 2.60205e4    | 970.19910    | 47.3874 |
| 2      | 12.698        | VB   | 0.4709      | 2.88896e4    | 844.99231    | 52.6126 |

Totals : 5.49101e4 1815.19141

Racemic standard

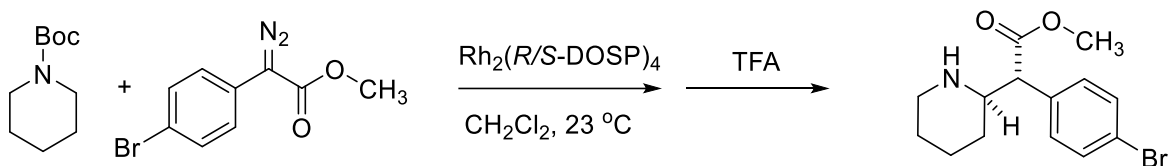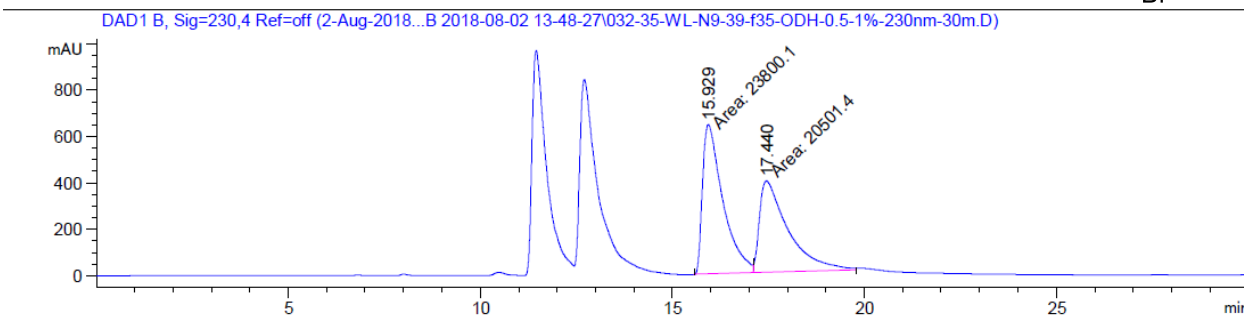

Signal 2: DAD1 B, Sig=230,4 Ref=off

| Peak # | RetTime [min] | Type | Width [min] | Area [mAU*s] | Height [mAU] | Area %  |
|--------|---------------|------|-------------|--------------|--------------|---------|
| 1      | 15.929        | MF   | 0.6162      | 2.38001e4    | 643.75751    | 53.7230 |
| 2      | 17.440        | FM   | 0.8670      | 2.05014e4    | 394.11142    | 46.2770 |

Totals : 4.43016e4 1037.86893

Racemic standard

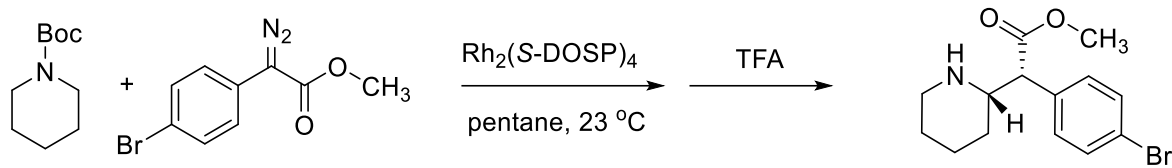

(Table S1, entry 1)

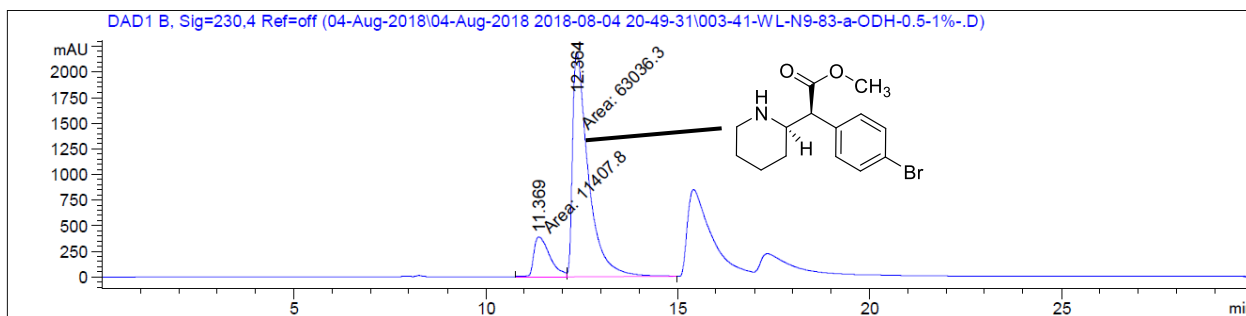

Signal 2: DAD1 B, Sig=230,4 Ref=off

| Peak # | RetTime [min] | Type | Width [min] | Area [mAU*s] | Height [mAU] | Area %  |
|--------|---------------|------|-------------|--------------|--------------|---------|
| 1      | 11.369        | MF   | 0.4861      | 1.14078e4    | 391.15503    | 15.3240 |
| 2      | 12.364        | FM   | 0.4783      | 6.30363e4    | 2196.41284   | 84.6760 |

Totals : 7.44441e4 2587.56787

→ -69% ee (major diastereomer)

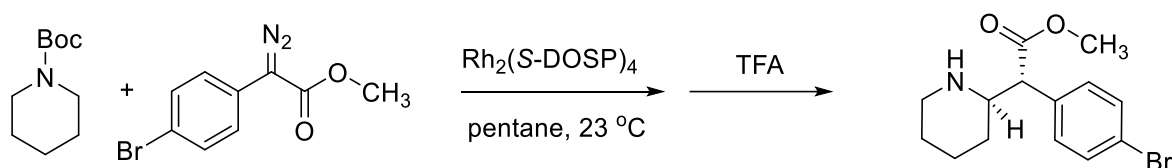

(Table S1, entry 1)

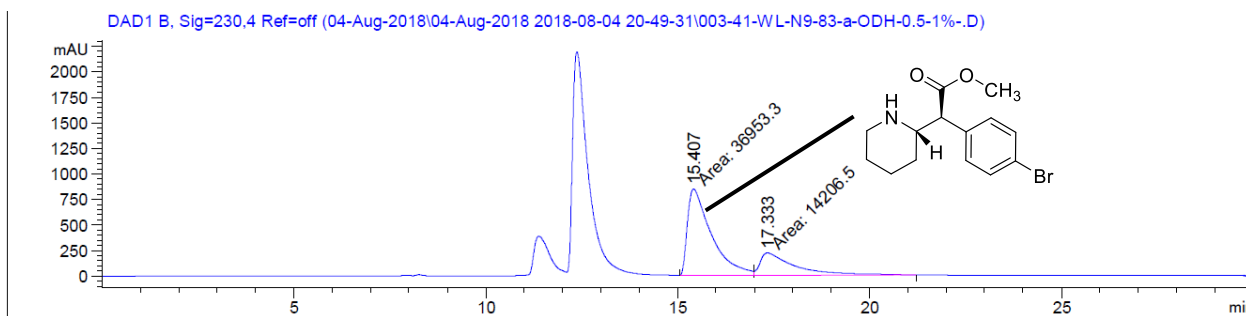

Signal 2: DAD1 B, Sig=230,4 Ref=off

| Peak # | RetTime [min] | Type | Width [min] | Area [mAU*s] | Height [mAU] | Area %  |
|--------|---------------|------|-------------|--------------|--------------|---------|
| 1      | 15.407        | MF   | 0.7243      | 3.69533e4    | 850.35370    | 72.2311 |
| 2      | 17.333        | FM   | 1.0738      | 1.42065e4    | 220.51192    | 27.7689 |

Totals : 5.11598e4 1070.86562

→ -44% ee (minor diastereomer)

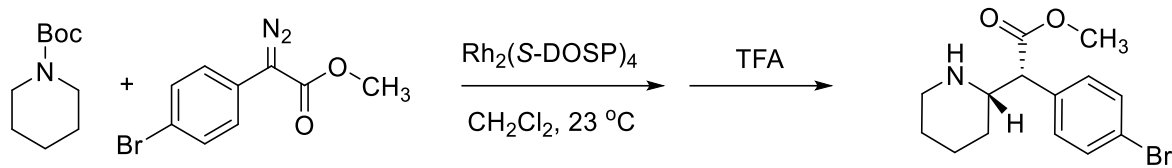

(Table 1, entry 1) (Table S1, entry 2)

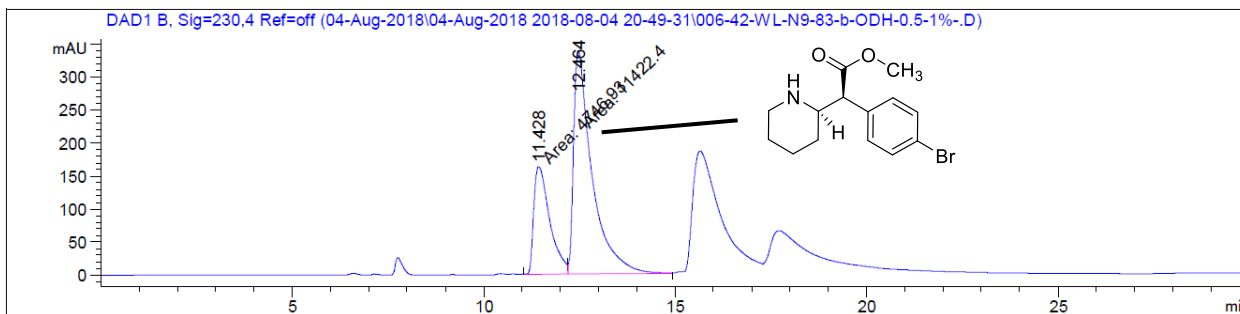

Signal 2: DAD1 B, Sig=230,4 Ref=off

| Peak # | RetTime [min] | Type | Width [min] | Area [mAU*s] | Height [mAU] | Area %  |
|--------|---------------|------|-------------|--------------|--------------|---------|
| 1      | 11.428        | MF   | 0.4845      | 4746.93408   | 163.28975    | 29.3577 |
| 2      | 12.464        | FM   | 0.5623      | 1.14224e4    | 338.57135    | 70.6423 |

Totals : 1.61693e4 501.86110

→ -41% ee (major diastereomer)

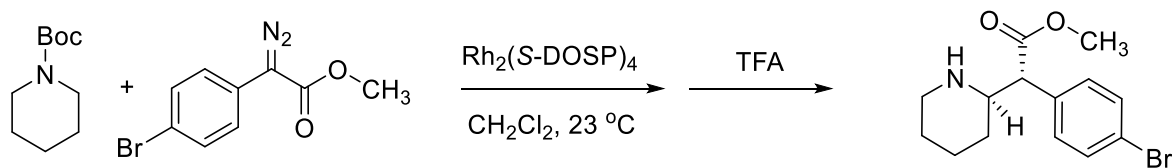

(Table 1, entry 1) (Table S1, entry 2)

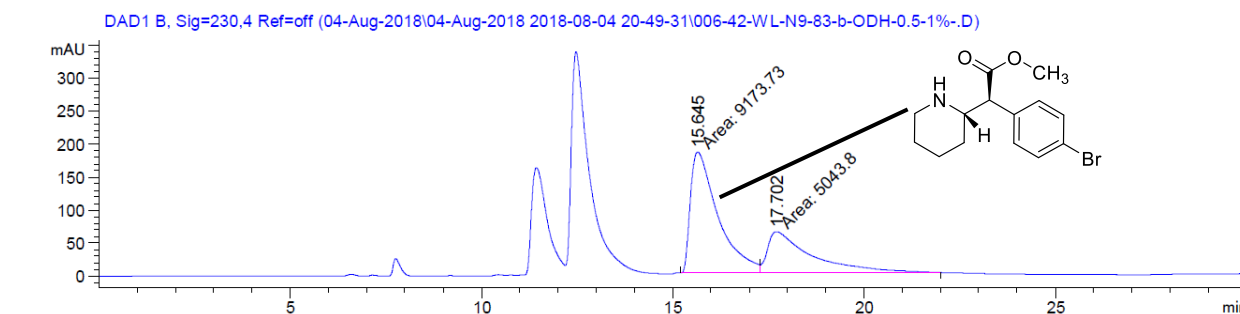

Signal 2: DAD1 B, Sig=230,4 Ref=off

| Peak # | RetTime [min] | Type | Width [min] | Area [mAU*s] | Height [mAU] | Area %  |
|--------|---------------|------|-------------|--------------|--------------|---------|
| 1      | 15.645        | MF   | 0.8344      | 9173.73242   | 183.24197    | 64.5241 |
| 2      | 17.702        | FM   | 1.3486      | 5043.79541   | 62.33588     | 35.4759 |

Totals : 1.42175e4 245.57785

→ -29% ee (minor diastereomer)





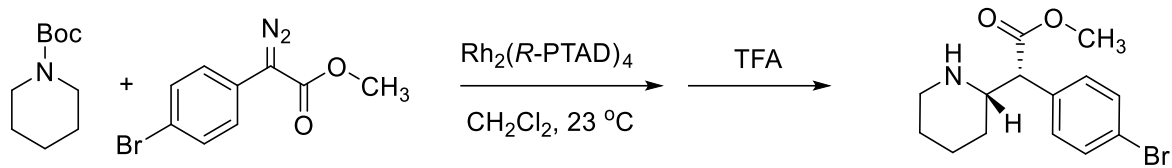

(Table S1, entry 3)

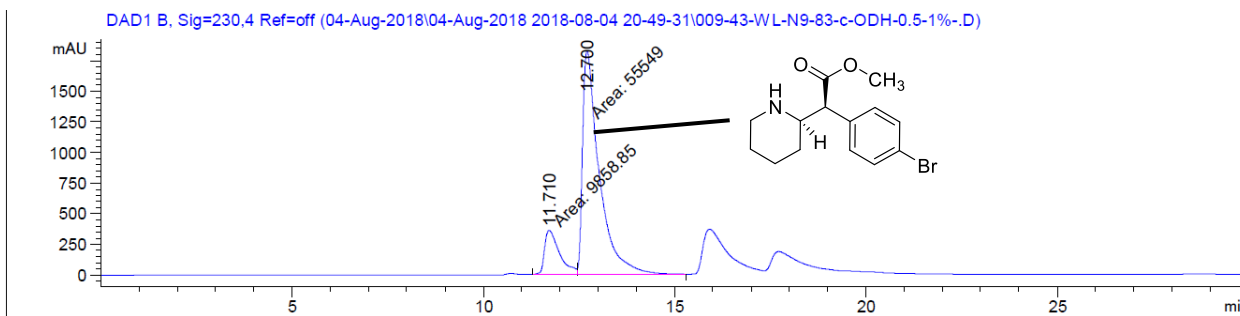

Signal 2: DAD1 B, Sig=230,4 Ref=off

| Peak # | RetTime [min] | Type | Width [min] | Area [mAU*s] | Height [mAU] | Area %  |
|--------|---------------|------|-------------|--------------|--------------|---------|
| 1      | 11.710        | MF   | 0.4549      | 9858.84961   | 361.19656    | 15.0729 |
| 2      | 12.700        | FM   | 0.5069      | 5.55490e4    | 1826.51587   | 84.9271 |

Totals : 6.54079e4 2187.71243

→ -70% ee (major diastereomer)

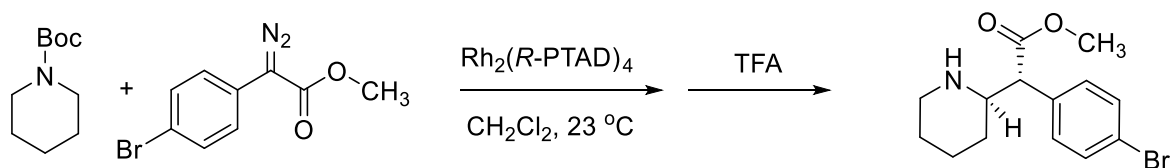

(Table S1, entry 3)

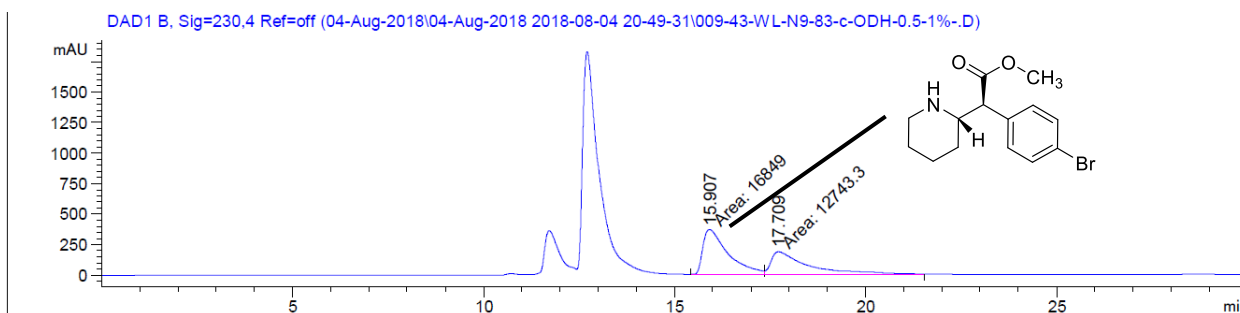

Signal 2: DAD1 B, Sig=230,4 Ref=off

| Peak # | RetTime [min] | Type | Width [min] | Area [mAU*s] | Height [mAU] | Area %  |
|--------|---------------|------|-------------|--------------|--------------|---------|
| 1      | 15.907        | MF   | 0.7638      | 1.68490e4    | 367.63730    | 56.9370 |
| 2      | 17.709        | FM   | 1.1443      | 1.27433e4    | 185.60614    | 43.0630 |

Totals : 2.95924e4 553.24344

→ -14% ee (minor diastereomer)



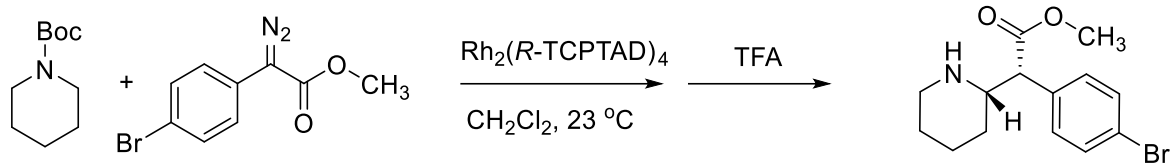

(Table 1, entry 2) (Table S1, entry 4)

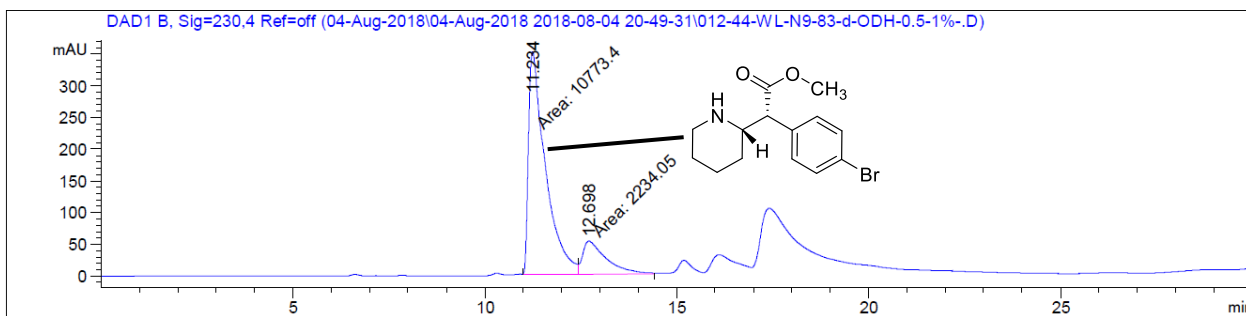

Signal 2: DAD1 B, Sig=230,4 Ref=off

| Peak # | RetTime [min] | Type | Width [min] | Area [mAU*s] | Height [mAU] | Area %  |
|--------|---------------|------|-------------|--------------|--------------|---------|
| 1      | 11.234        | MF   | 0.5119      | 1.07734e4    | 350.74805    | 82.8248 |
| 2      | 12.698        | FM   | 0.7135      | 2234.05225   | 52.18573     | 17.1752 |

Totals : 1.30074e4 402.93378

→ 66% ee (major diastereomer)

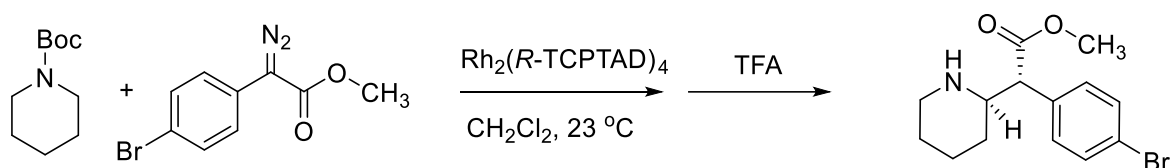

(Table 1, entry 2) (Table S1, entry 4)

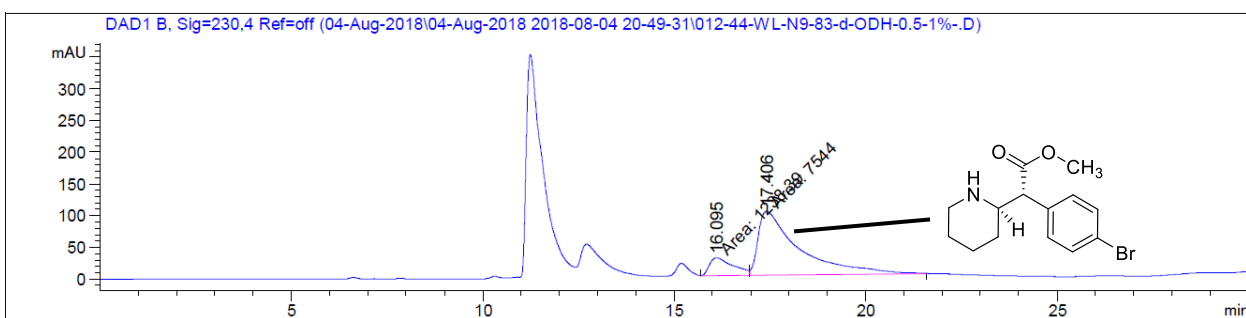

Signal 2: DAD1 B, Sig=230,4 Ref=off

| Peak # | RetTime [min] | Type | Width [min] | Area [mAU*s] | Height [mAU] | Area %  |
|--------|---------------|------|-------------|--------------|--------------|---------|
| 1      | 16.095        | MF   | 0.7273      | 1238.38721   | 28.37903     | 14.1008 |
| 2      | 17.406        | FM   | 1.2465      | 7544.00244   | 100.86837    | 85.8992 |

Totals : 8782.38965 129.24740

→ 72% ee (minor diastereomer)



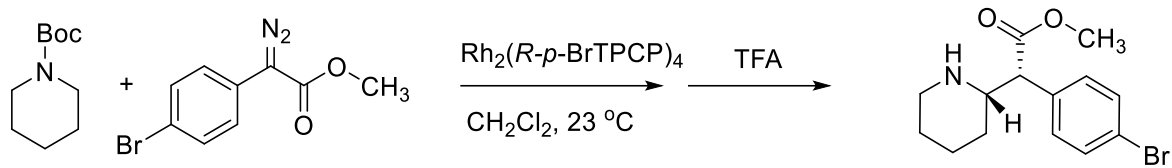

(Table 1, entry 3) (Table S1, entry 5)

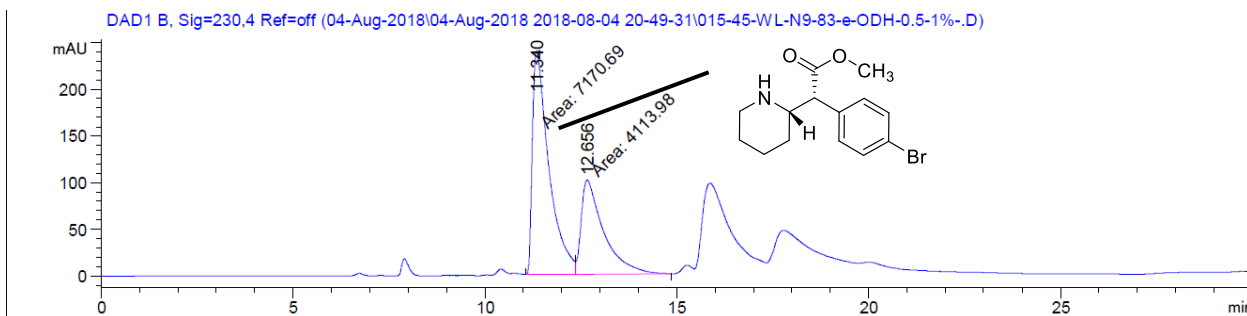

Signal 2: DAD1 B, Sig=230,4 Ref=off

| Peak # | RetTime [min] | Type | Width [min] | Area [mAU*s] | Height [mAU] | Area %  |
|--------|---------------|------|-------------|--------------|--------------|---------|
| 1      | 11.340        | MF   | 0.4991      | 7170.69434   | 239.46901    | 63.5436 |
| 2      | 12.656        | FM   | 0.6795      | 4113.98340   | 100.90635    | 36.4564 |

Totals : 1.12847e4 340.37536

→ 27% ee (major diastereomer)

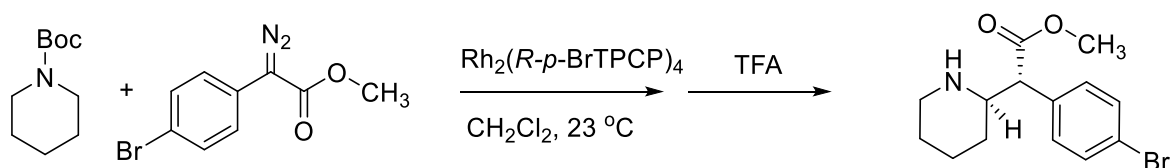

(Table 1, entry 3) (Table S1, entry 5)

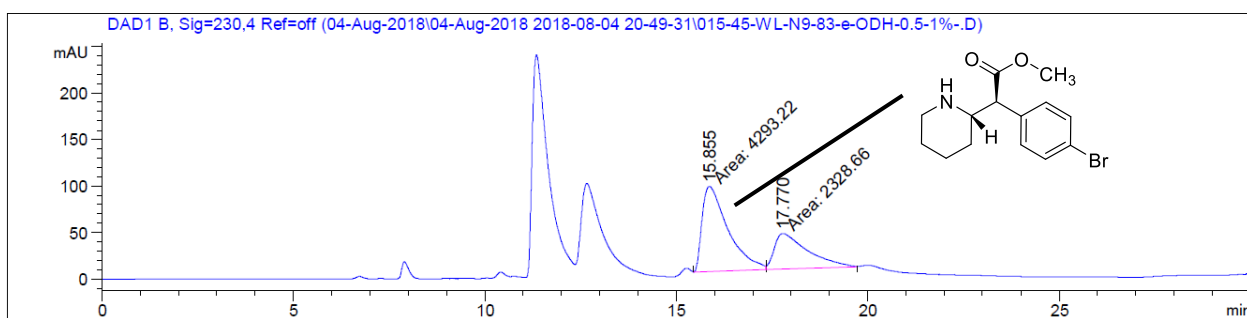

Signal 2: DAD1 B, Sig=230,4 Ref=off

| Peak # | RetTime [min] | Type | Width [min] | Area [mAU*s] | Height [mAU] | Area %  |
|--------|---------------|------|-------------|--------------|--------------|---------|
| 1      | 15.855        | MF   | 0.7847      | 4293.22119   | 91.18973     | 64.8338 |
| 2      | 17.770        | FM   | 1.0161      | 2328.66284   | 38.19611     | 35.1662 |

Totals : 6621.88403 129.38584

→ -30% ee (minor diastereomer)

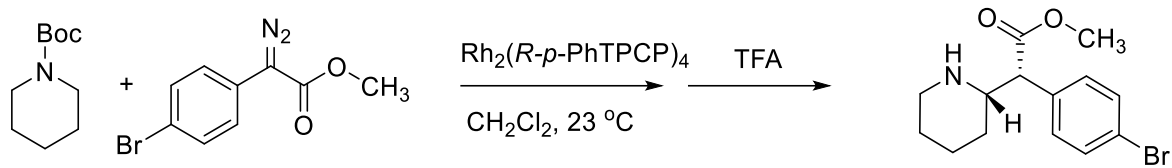

(Table S1, entry 6)

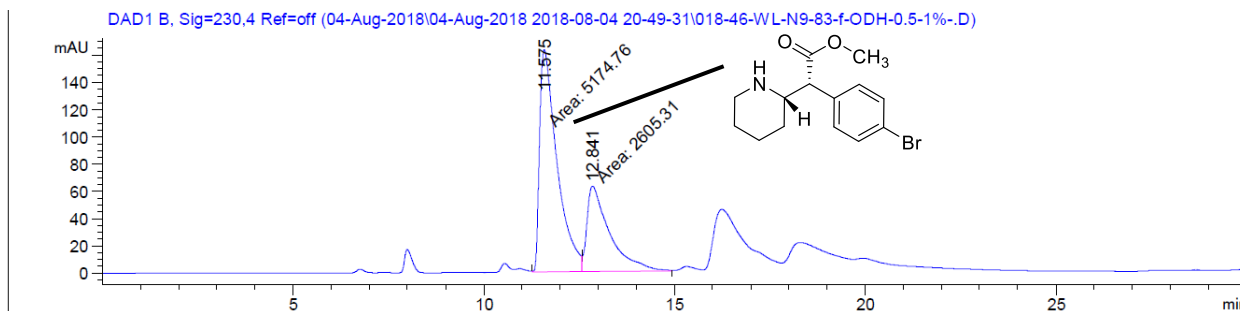

Signal 2: DAD1 B, Sig=230,4 Ref=off

| Peak # | RetTime [min] | Type | Width [min] | Area [mAU*s] | Height [mAU] | Area %  |
|--------|---------------|------|-------------|--------------|--------------|---------|
| 1      | 11.575        | MF   | 0.5285      | 5174.75732   | 163.20267    | 66.5130 |
| 2      | 12.841        | FM   | 0.6917      | 2605.31250   | 62.77508     | 33.4870 |

Totals : 7780.06982 225.97775

→ 33% ee (major diastereomer)

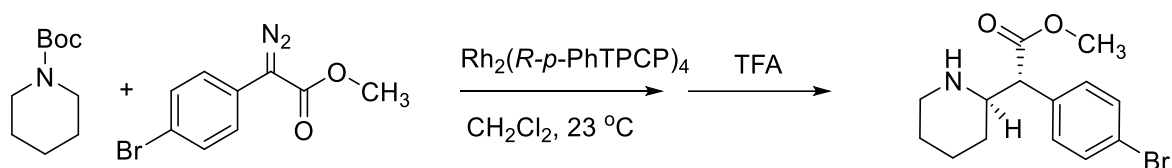

(Table S1, entry 6)

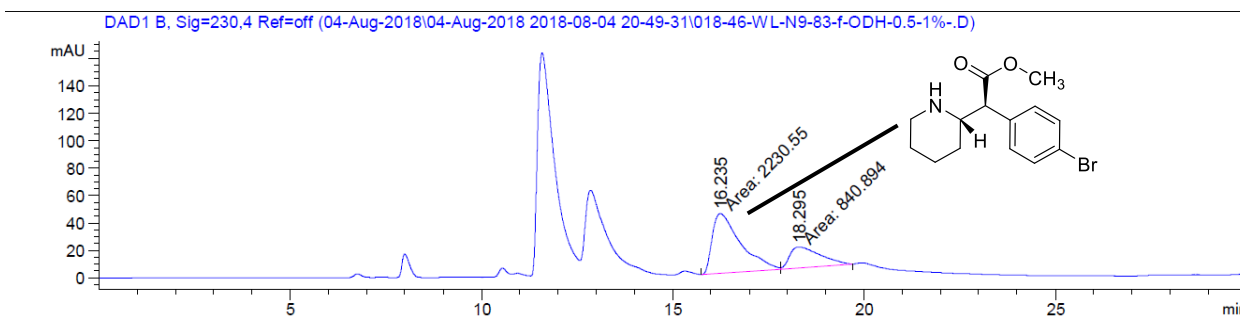

Signal 2: DAD1 B, Sig=230,4 Ref=off

| Peak # | RetTime [min] | Type | Width [min] | Area [mAU*s] | Height [mAU] | Area %  |
|--------|---------------|------|-------------|--------------|--------------|---------|
| 1      | 16.235        | MF   | 0.8545      | 2230.54614   | 43.50617     | 72.6221 |
| 2      | 18.295        | FM   | 0.6483      | 840.89447    | 15.20243     | 27.3779 |

Totals : 3071.44061 58.70860

→ -45% ee (minor diastereomer)





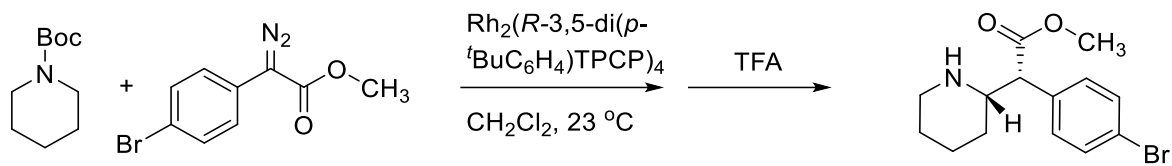

(Table S1, entry 7)

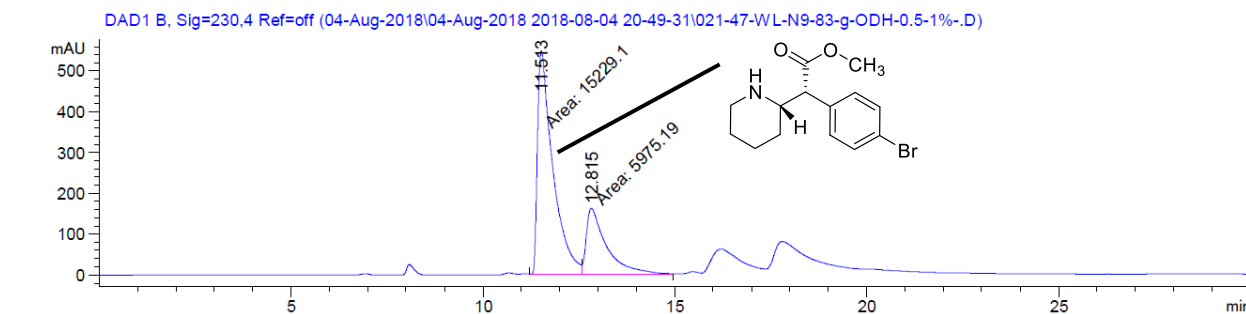

Signal 2: DAD1 B, Sig=230,4 Ref=off

| Peak # | RetTime [min] | Type | Width [min] | Area [mAU*s] | Height [mAU] | Area %  |
|--------|---------------|------|-------------|--------------|--------------|---------|
| 1      | 11.513        | MF   | 0.4633      | 1.52291e4    | 547.82129    | 71.8208 |
| 2      | 12.815        | FM   | 0.6153      | 5975.18896   | 161.85378    | 28.1792 |

Totals : 2.12043e4 709.67506

→ 44% ee (major diastereomer)

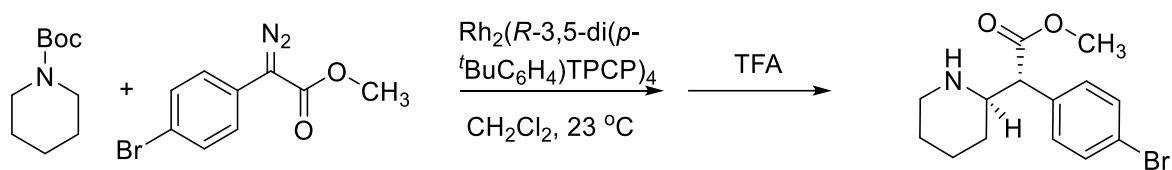

(Table S1, entry 7)

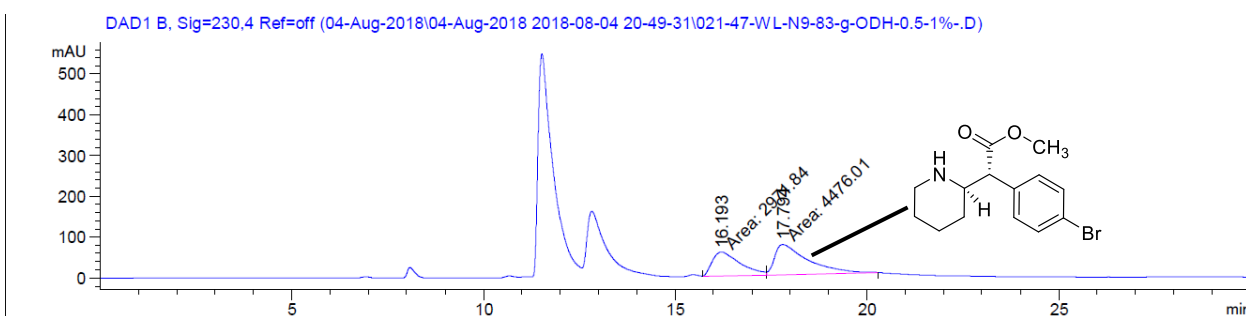

Signal 2: DAD1 B, Sig=230,4 Ref=off

| Peak # | RetTime [min] | Type | Width [min] | Area [mAU*s] | Height [mAU] | Area %  |
|--------|---------------|------|-------------|--------------|--------------|---------|
| 1      | 16.193        | MF   | 0.8420      | 2971.83643   | 58.82652     | 39.9020 |
| 2      | 17.794        | FM   | 1.0082      | 4476.00732   | 73.99231     | 60.0980 |

Totals : 7447.84375 132.81882

→ 20% ee (minor diastereomer)



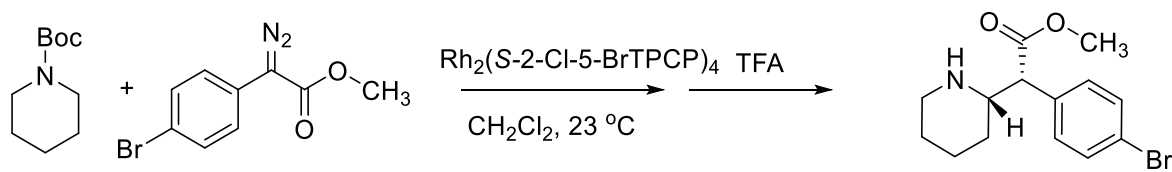

(Table 1, entry 5) (Table S1, entry 8)

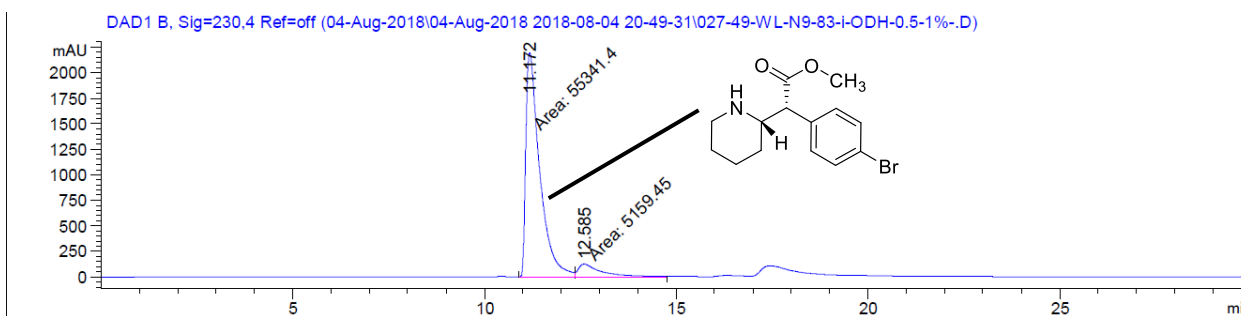

Signal 2: DAD1 B, Sig=230,4 Ref=off

| Peak # | RetTime [min] | Type | Width [min] | Area [mAU*s] | Height [mAU] | Area %  |
|--------|---------------|------|-------------|--------------|--------------|---------|
| 1      | 11.172        | MF   | 0.4202      | 5.53414e4    | 2195.25513   | 91.4721 |
| 2      | 12.585        | FM   | 0.6839      | 5159.44531   | 125.74113    | 8.5279  |

Totals : 6.05009e4 2320.99625

→ 83% ee (major diastereomer)

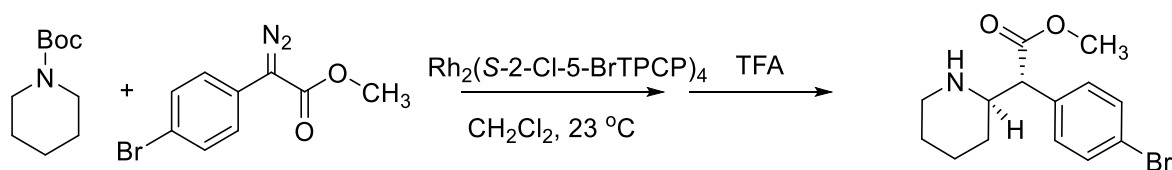

(Table 1, entry 5) (Table S1, entry 8)

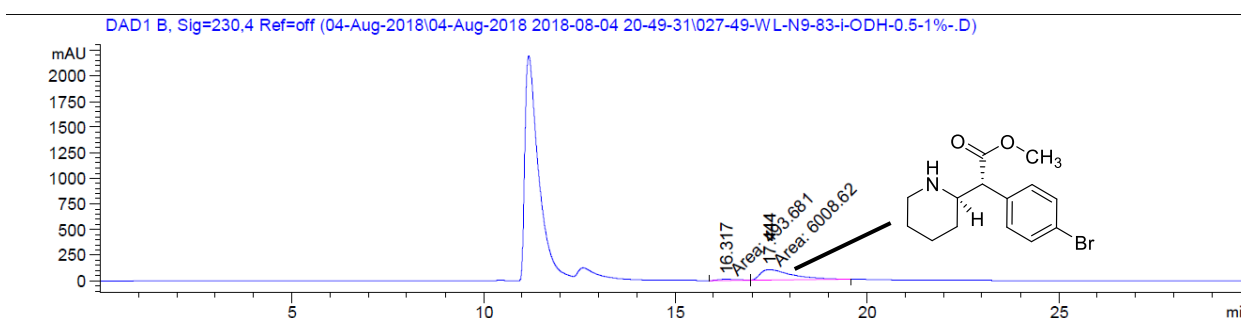

Signal 2: DAD1 B, Sig=230,4 Ref=off

| Peak # | RetTime [min] | Type | Width [min] | Area [mAU*s] | Height [mAU] | Area %  |
|--------|---------------|------|-------------|--------------|--------------|---------|
| 1      | 16.317        | MF   | 0.6305      | 493.68134    | 13.04979     | 7.5924  |
| 2      | 17.444        | FM   | 0.6887      | 6008.62402   | 102.47517    | 92.4076 |

Totals : 6502.30536 115.52495

→ 85% ee (minor diastereomer)

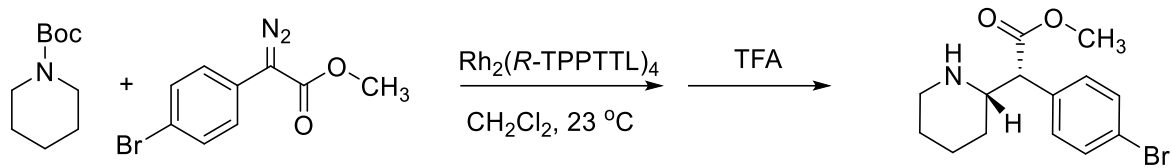

(Table S1, entry 9)

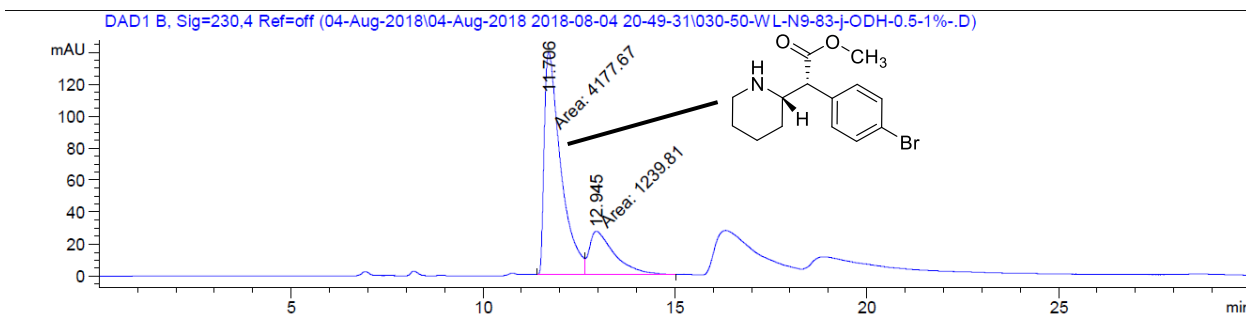

Signal 2: DAD1 B, Sig=230,4 Ref=off

| Peak # | RetTime [min] | Type | Width [min] | Area [mAU*s] | Height [mAU] | Area %  |
|--------|---------------|------|-------------|--------------|--------------|---------|
| 1      | 11.706        | MF   | 0.4993      | 4177.66504   | 139.45123    | 77.1147 |
| 2      | 12.945        | FM   | 0.7599      | 1239.80676   | 27.19378     | 22.8853 |

Totals : 5417.47180 166.64501

→ 54% ee (major diastereomer)

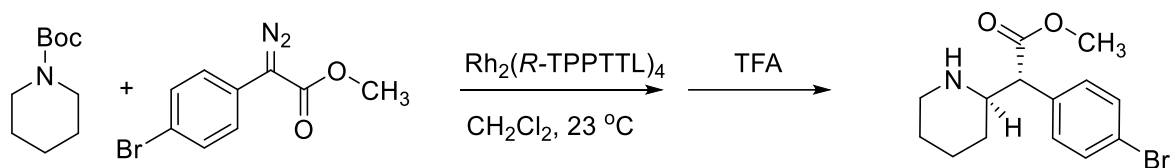

(Table S1, entry 9)

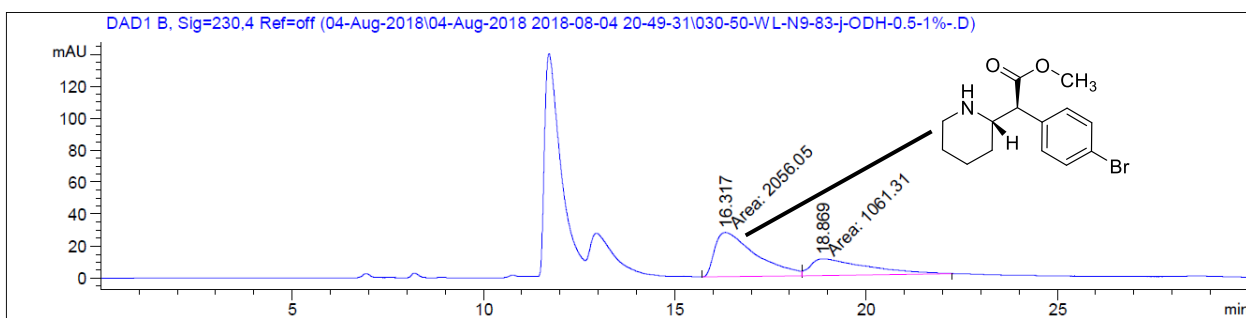

Signal 2: DAD1 B, Sig=230,4 Ref=off

| Peak # | RetTime [min] | Type | Width [min] | Area [mAU*s] | Height [mAU] | Area %  |
|--------|---------------|------|-------------|--------------|--------------|---------|
| 1      | 16.317        | MF   | 1.2393      | 2056.05444   | 27.65072     | 65.9550 |
| 2      | 18.869        | FM   | 1.7064      | 1061.30603   | 10.36617     | 34.0450 |

Totals : 3117.36047 38.01689

→ -32% ee (minor diastereomer)



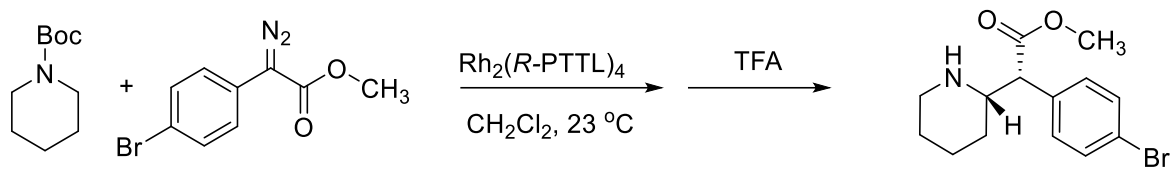

(Table S1, entry 10)

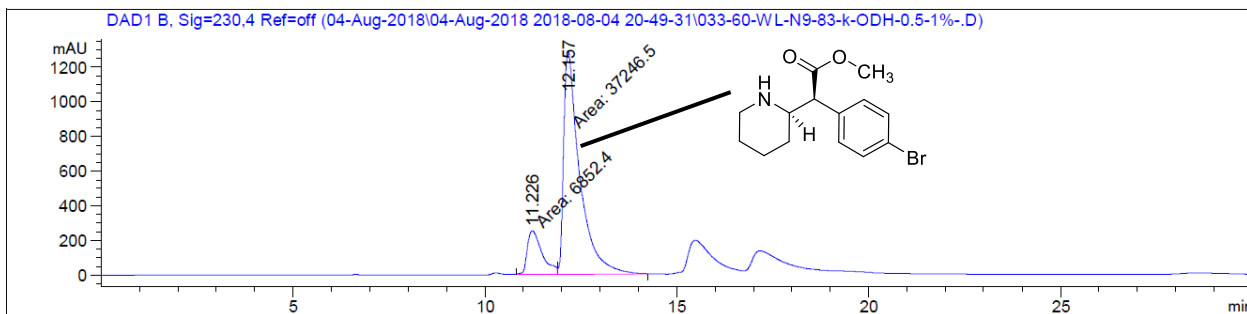

Signal 2: DAD1 B, Sig=230,4 Ref=off

| Peak # | RetTime [min] | Type | Width [min] | Area [mAU*s] | Height [mAU] | Area %  |
|--------|---------------|------|-------------|--------------|--------------|---------|
| 1      | 11.226        | MF   | 0.4520      | 6852.39844   | 252.68811    | 15.5387 |
| 2      | 12.157        | FM   | 0.4810      | 3.72465e4    | 1290.56372   | 84.4613 |

Totals : 4.40989e4 1543.25183

→ -69% ee (major diastereomer)

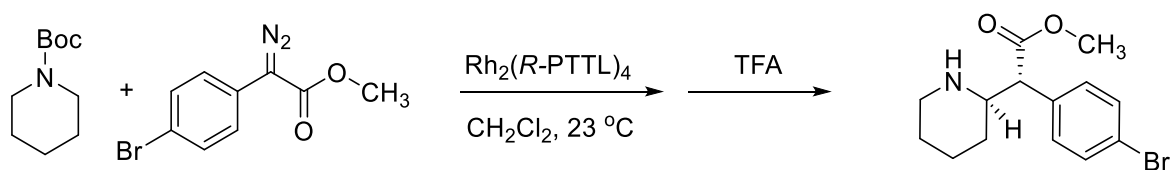

(Table S1, entry 10)

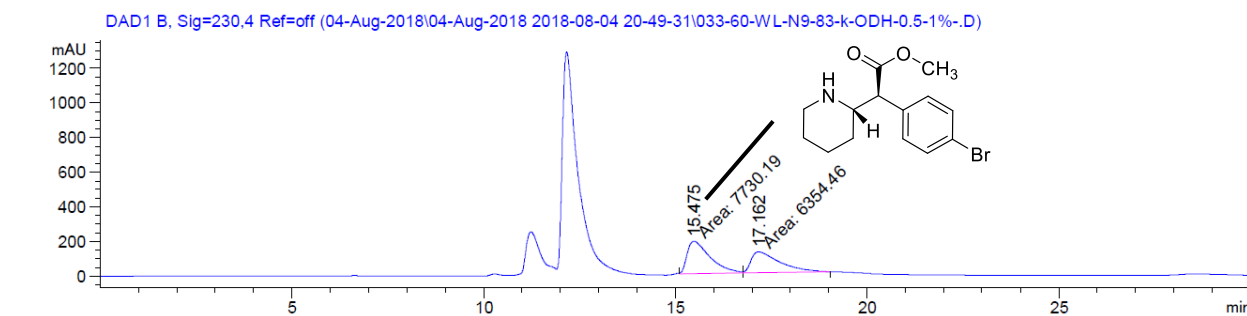

Signal 2: DAD1 B, Sig=230,4 Ref=off

| Peak # | RetTime [min] | Type | Width [min] | Area [mAU*s] | Height [mAU] | Area %  |
|--------|---------------|------|-------------|--------------|--------------|---------|
| 1      | 15.475        | MF   | 0.6927      | 7730.19336   | 185.98138    | 54.8838 |
| 2      | 17.162        | FM   | 0.8777      | 6354.45508   | 120.67137    | 45.1162 |

Totals : 1.40846e4 306.65276

→ -10% ee (minor diastereomer)



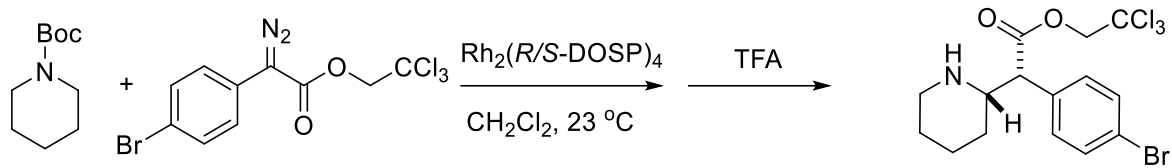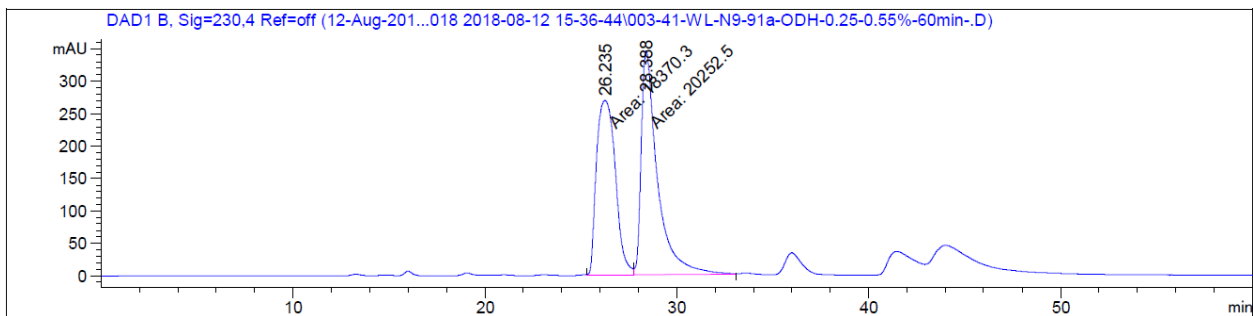

Signal 2: DAD1 B, Sig=230,4 Ref=off

| Peak # | RetTime [min] | Type | Width [min] | Area [mAU*s] | Height [mAU] | Area %  |
|--------|---------------|------|-------------|--------------|--------------|---------|
| 1      | 26.235        | MF   | 1.1408      | 1.83703e4    | 268.38867    | 47.5633 |
| 2      | 28.388        | FM   | 0.9793      | 2.02525e4    | 344.68665    | 52.4367 |

Totals : 3.86228e4 613.07532

Racemic standard

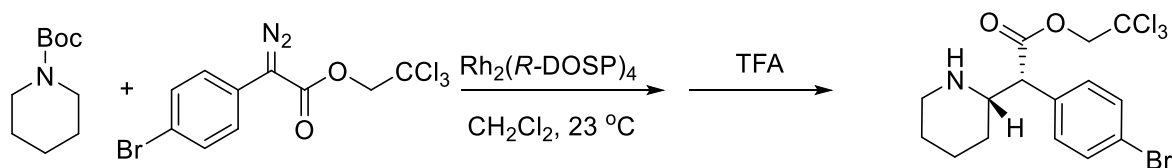

(Table S1, entry 11)

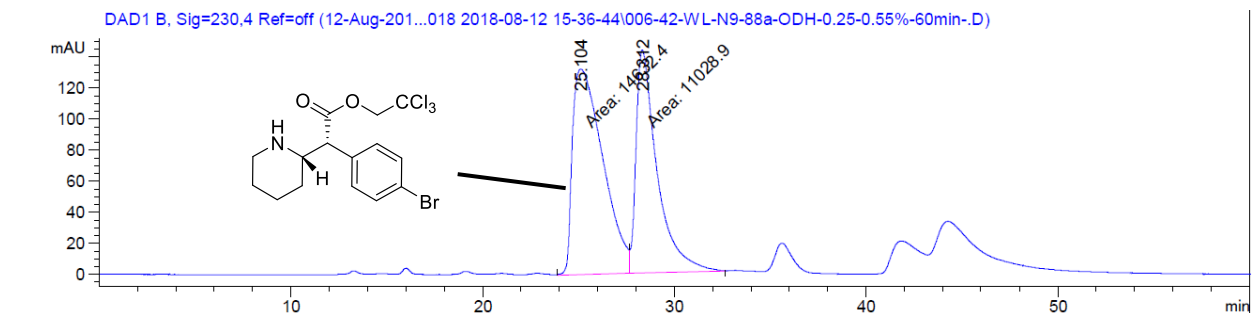

Signal 2: DAD1 B, Sig=230,4 Ref=off

| Peak # | RetTime [min] | Type | Width [min] | Area [mAU*s] | Height [mAU] | Area %  |
|--------|---------------|------|-------------|--------------|--------------|---------|
| 1      | 25.104        | MF   | 1.8405      | 1.46324e4    | 132.50249    | 57.0213 |
| 2      | 28.312        | FM   | 1.2775      | 1.10289e4    | 143.88950    | 42.9787 |

Totals : 2.56613e4 276.39198

→ 14% ee



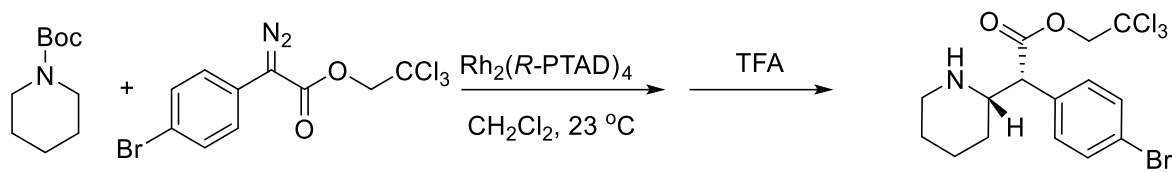

(Table S1, entry 12)

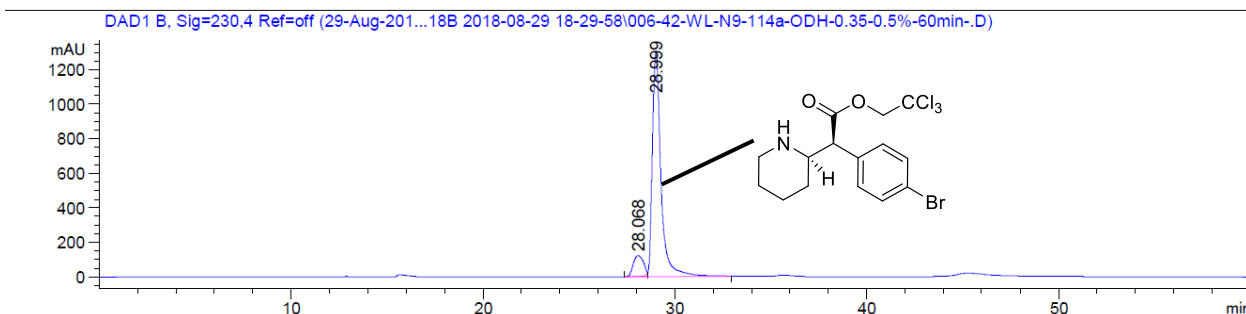

Signal 2: DAD1 B, Sig=230,4 Ref=off

| Peak # | RetTime [min] | Type | Width [min] | Area [mAU*s] | Height [mAU] | Area %  |
|--------|---------------|------|-------------|--------------|--------------|---------|
| 1      | 28.068        | BV E | 0.4497      | 4465.76807   | 121.68364    | 9.8563  |
| 2      | 28.999        | VB R | 0.4661      | 4.08430e4    | 1301.45325   | 90.1437 |

Totals : 4.53087e4 1423.13689

→ -80% ee

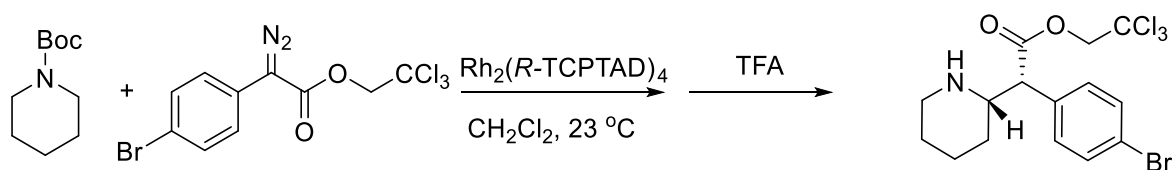

(Table 1, entry 7) (Table S1, entry 13)

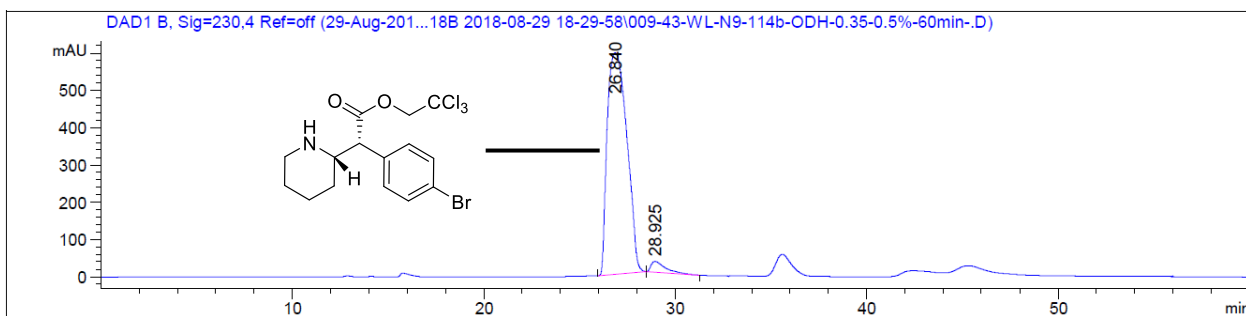

Signal 2: DAD1 B, Sig=230,4 Ref=off

| Peak # | RetTime [min] | Type | Width [min] | Area [mAU*s] | Height [mAU] | Area %  |
|--------|---------------|------|-------------|--------------|--------------|---------|
| 1      | 26.840        | BB   | 0.8340      | 4.23118e4    | 594.36523    | 96.4261 |
| 2      | 28.925        | BB   | 0.6203      | 1568.23633   | 29.63874     | 3.5739  |

Totals : 4.38801e4 624.00398

→ 93% ee



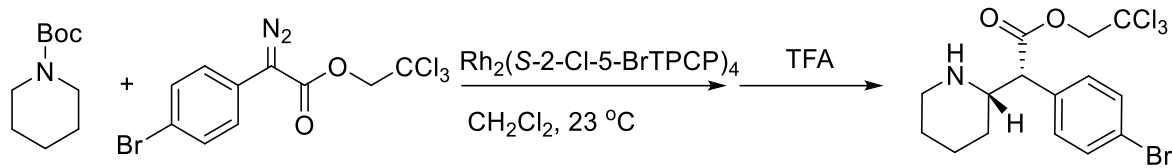

(Table 1, entry 6) (Table S1, entry 14)

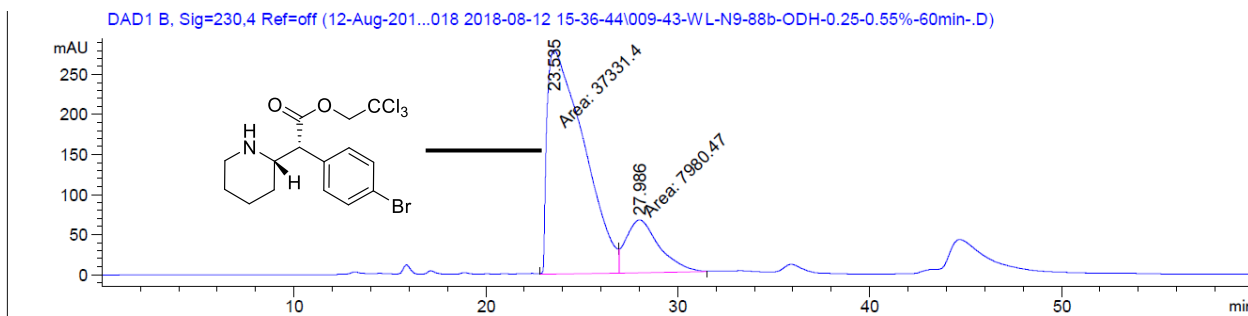

Signal 2: DAD1 B, Sig=230,4 Ref=off

| Peak # | RetTime [min] | Type | Width [min] | Area [mAU*s] | Height [mAU] | Area %  |
|--------|---------------|------|-------------|--------------|--------------|---------|
| 1      | 23.535        | MF   | 2.2210      | 3.73314e4    | 280.14163    | 82.3877 |
| 2      | 27.986        | FM   | 2.0146      | 7980.47217   | 66.02348     | 17.6123 |

Totals : 4.53119e4 346.16512

→ 65% ee

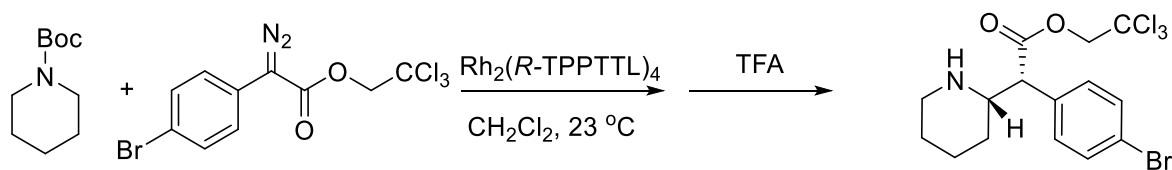

(Table 1, entry 8) (Table S1, entry 15)

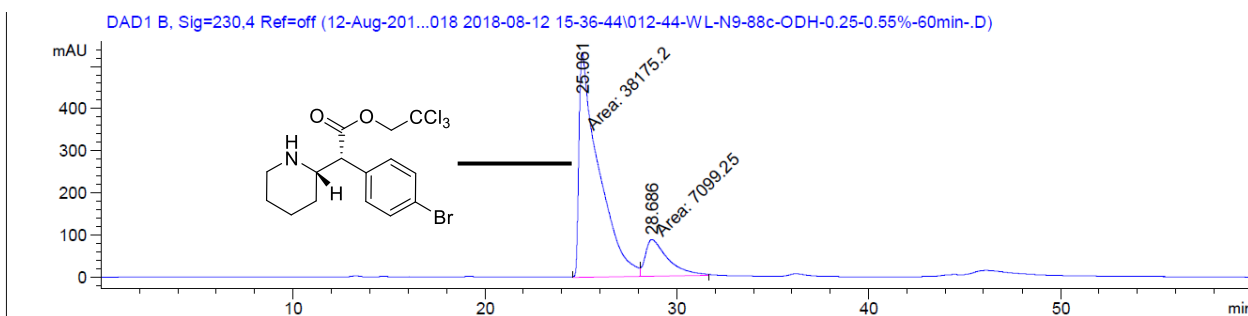

Signal 2: DAD1 B, Sig=230,4 Ref=off

| Peak # | RetTime [min] | Type | Width [min] | Area [mAU*s] | Height [mAU] | Area %  |
|--------|---------------|------|-------------|--------------|--------------|---------|
| 1      | 25.061        | MF   | 1.1910      | 3.81752e4    | 534.21667    | 84.3195 |
| 2      | 28.686        | FM   | 1.3590      | 7099.25146   | 87.06653     | 15.6805 |

Totals : 4.52744e4 621.28320

→ 69% ee



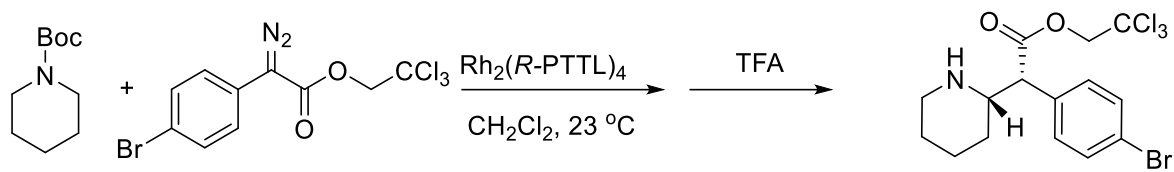

(Table S1, entry 16)

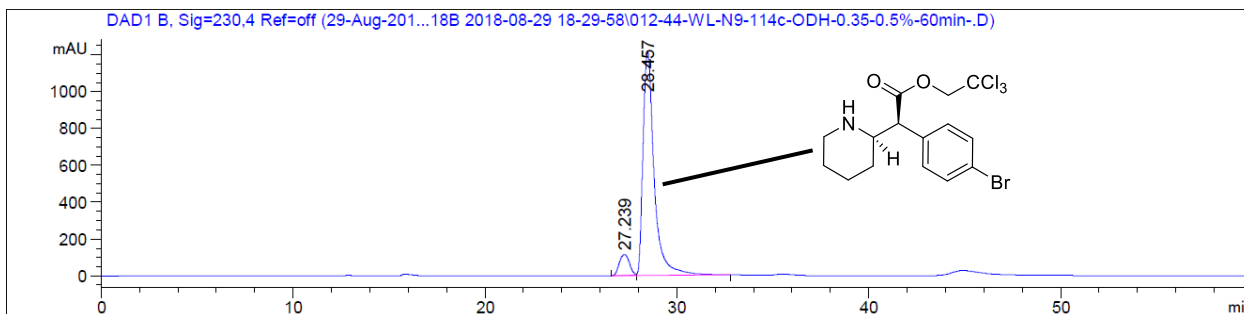

Signal 2: DAD1 B, Sig=230,4 Ref=off

| Peak # | RetTime [min] | Type | Width [min] | Area [mAU*s] | Height [mAU] | Area %  |
|--------|---------------|------|-------------|--------------|--------------|---------|
| 1      | 27.239        | BV E | 0.4451      | 4183.92627   | 113.63413    | 7.8234  |
| 2      | 28.457        | VB R | 0.5516      | 4.92957e4    | 1219.38342   | 92.1766 |

Totals : 5.34796e4 1333.01756 → -84% ee

## Racemic standard

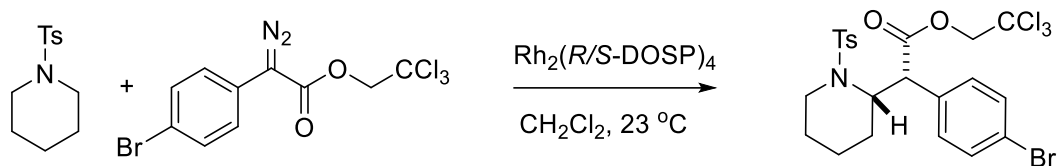

WL-N9-91b-C2-f14-ADH-0.5-5%-230nm-80min-6.DATA - Prostar 325 Absorbance Channel 2 LC1006M831

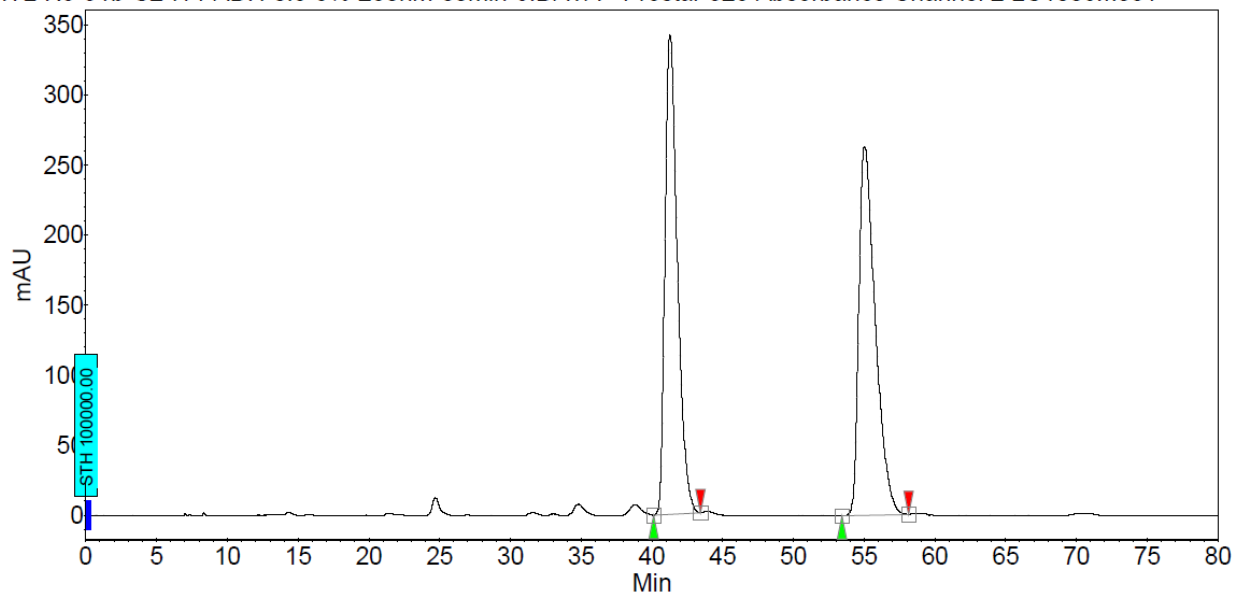

### Peak results :

| Index | Name    | Time [Min] | Quantity [% Area] | Height [mAU] | Area [mAU.Min] | Area % [%] |
|-------|---------|------------|-------------------|--------------|----------------|------------|
| 1     | UNKNOWN | 41.27      | 49.39             | 342.0        | 346.4          | 49.391     |
| 2     | UNKNOWN | 55.03      | 50.61             | 263.2        | 355.0          | 50.609     |
| Total |         |            | 100.00            | 605.3        | 701.4          | 100.000    |

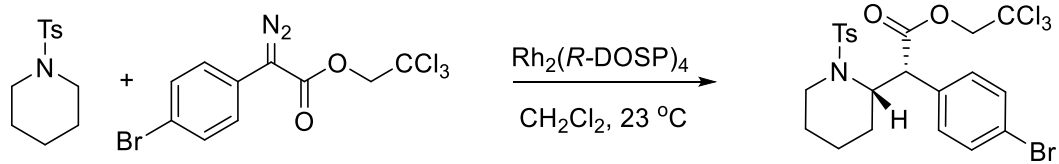

(Table S2, entry 1)

WL-N9-99-f2329-ADH-0.5-5%-230nm-80min-93.DATA - Prostar 325 Absorbance Channel 2 LC1006M831

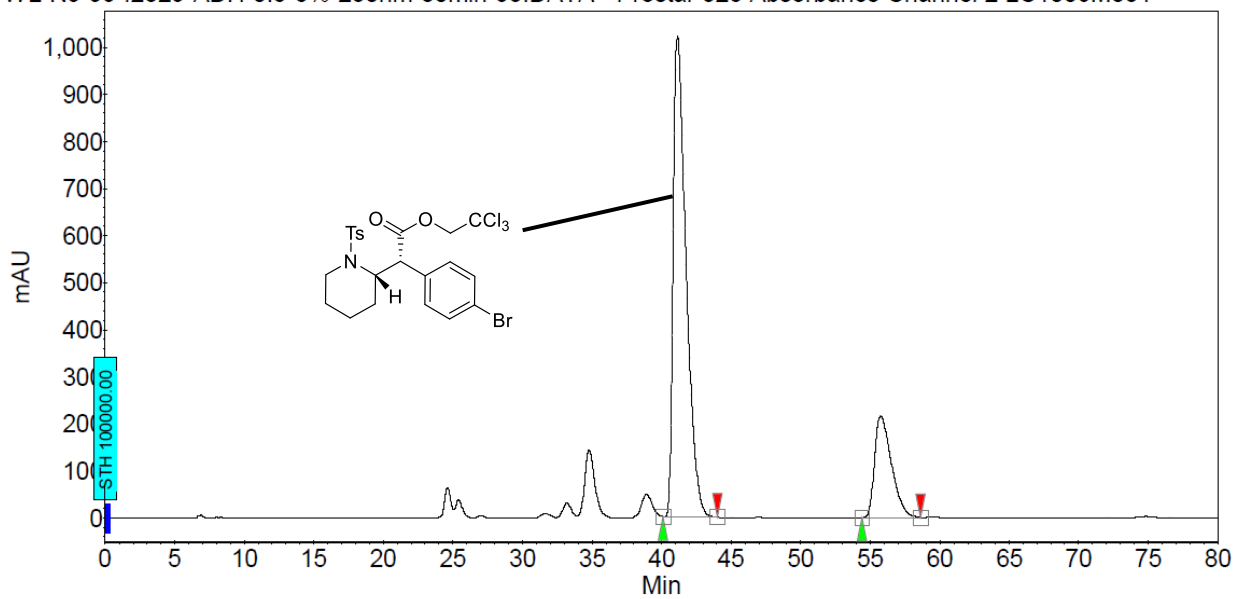

**Peak results :**

| Index | Name    | Time [Min] | Quantity [% Area] | Height [mAU] | Area [mAU.Min] | Area % [%] |
|-------|---------|------------|-------------------|--------------|----------------|------------|
| 1     | UNKNOWN | 41.14      | 78.46             | 1022.7       | 1099.6         | 78.463     |
| 2     | UNKNOWN | 55.76      | 21.54             | 216.3        | 301.8          | 21.537     |
| Total |         |            | 100.00            | 1238.9       | 1401.5         | 100.000    |

→ 57% ee

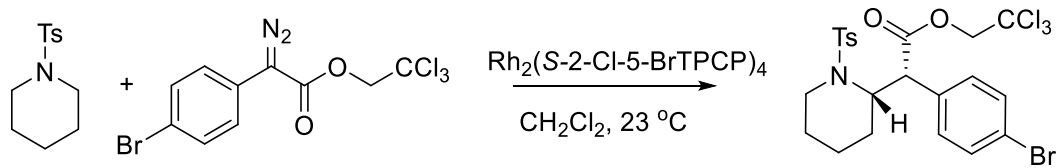

(Table S2, entry 2)

WL-N9-80-2nd-f32-C2-ADH-0.5-5%-230nm-80min-96.DATA - Prostar 325 Absorbance Channel 2 LC1006M831

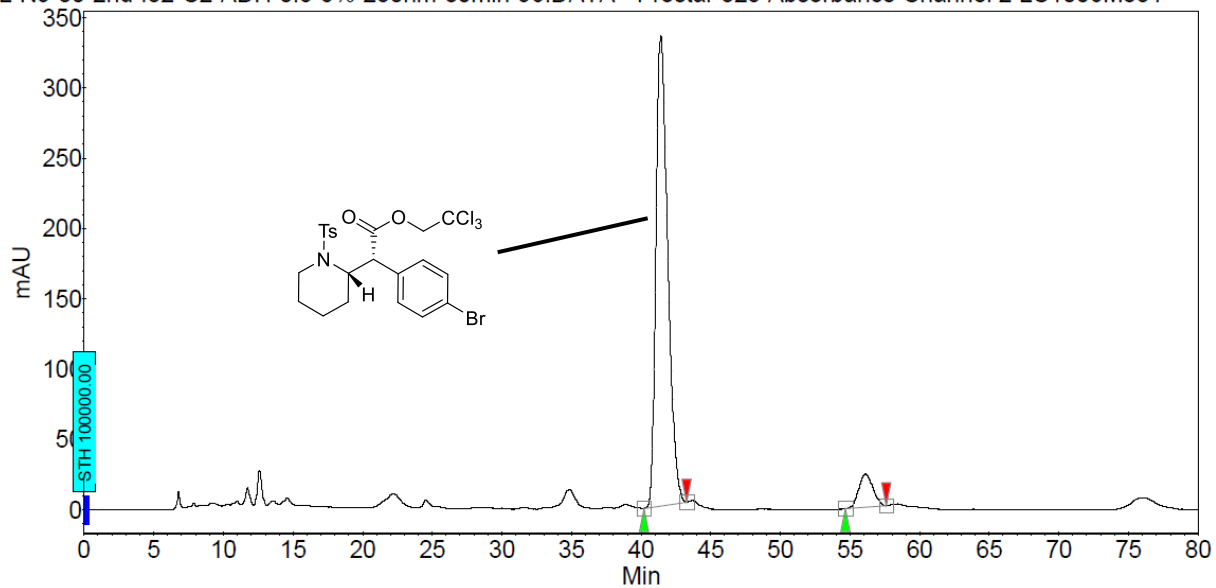

**Peak results :**

| Index | Name    | Time [Min] | Quantity [% Area] | Height [mAU] | Area [mAU.Min] | Area % [%] |
|-------|---------|------------|-------------------|--------------|----------------|------------|
| 1     | UNKNOWN | 41.40      | 92.24             | 334.8        | 328.1          | 92.237     |
| 2     | UNKNOWN | 56.11      | 7.76              | 23.4         | 27.6           | 7.763      |
| Total |         |            | 100.00            | 358.3        | 355.8          | 100.000    |

→ 84% ee



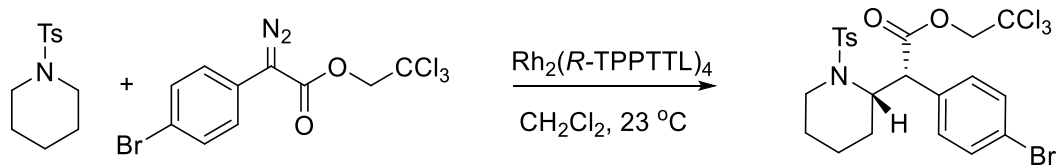

(Table S2, entry 3)

WL-N9-93b-C2-f14-ADH-0.5-5%-230nm-80min-12.DATA - Prostar 325 Absorbance Channel 2 LC1006M831

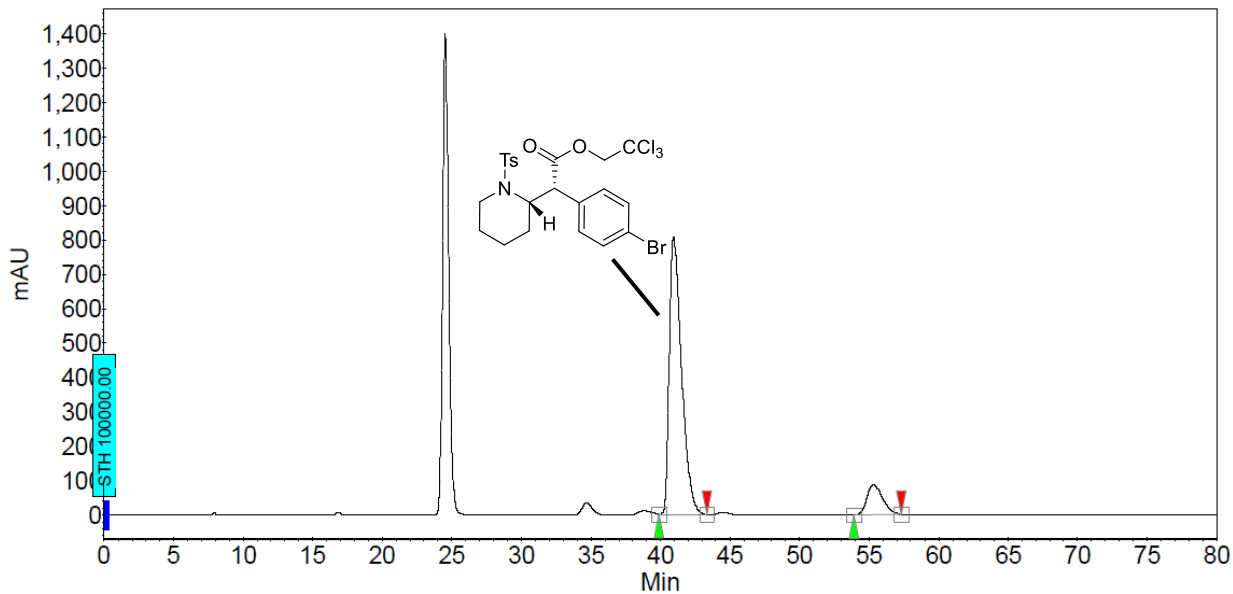

**Peak results :**

| Index | Name    | Time [Min] | Quantity [% Area] | Height [mAU] | Area [mAU.Min] | Area % [%] |
|-------|---------|------------|-------------------|--------------|----------------|------------|
| 1     | UNKNOWN | 40.94      | 88.03             | 808.2        | 826.1          | 88.029     |
| 2     | UNKNOWN | 55.33      | 11.97             | 86.2         | 112.3          | 11.971     |
| Total |         |            | 100.00            | 894.4        | 938.4          | 100.000    |

→ 76% ee

Racemic standard

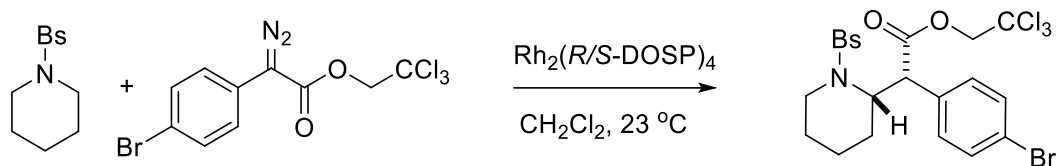

WL-N9-91c-C2(f2124)-ADH-0.5-5%-230nm-80min-8.DATA - Prostar 325 Absorbance Channel 2 LC1006M831

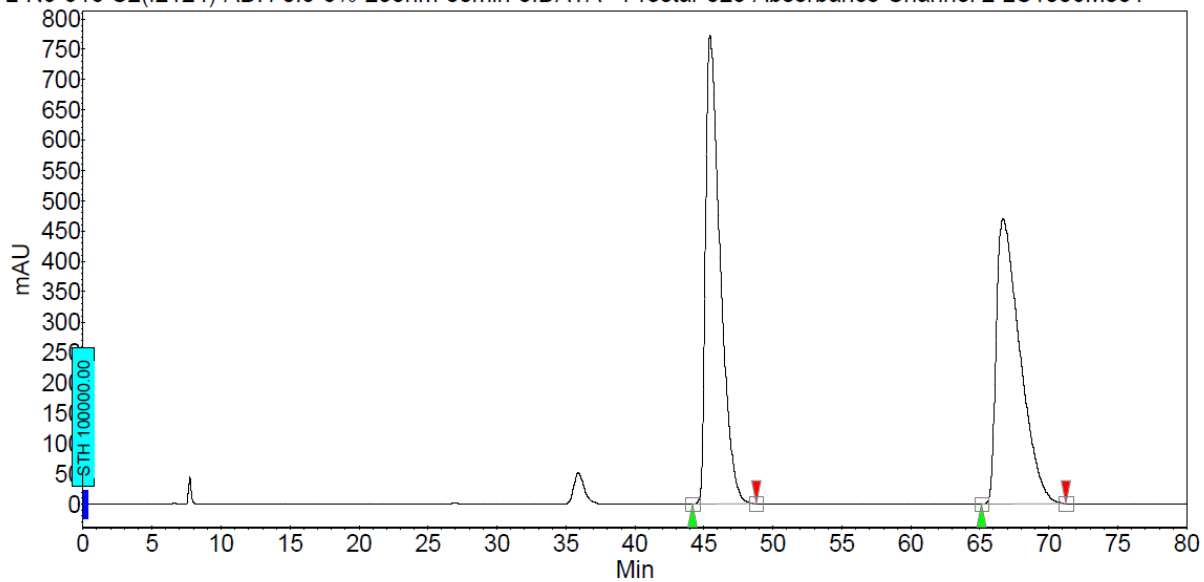

Peak results :

| Index | Name    | Time [Min] | Quantity [% Area] | Height [mAU] | Area [mAU.Min] | Area % [%] |
|-------|---------|------------|-------------------|--------------|----------------|------------|
| 1     | UNKNOWN | 45.44      | 50.39             | 772.7        | 947.2          | 50.386     |
| 2     | UNKNOWN | 66.68      | 49.61             | 470.6        | 932.7          | 49.614     |
| Total |         |            | 100.00            | 1243.3       | 1879.8         | 100.000    |

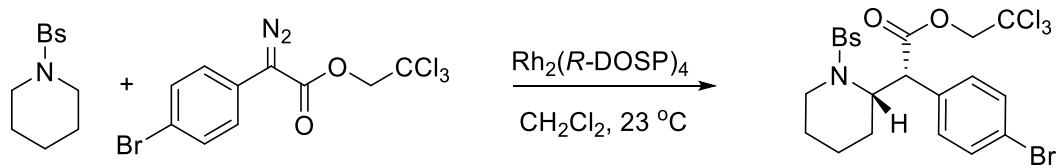

(Table S2, entry 4)

WL-N9-101a-C2(f1227)-ADH-0.5-5%-230nm-80min-5.DATA - Prostar 325 Absorbance Channel 2 LC1006M831

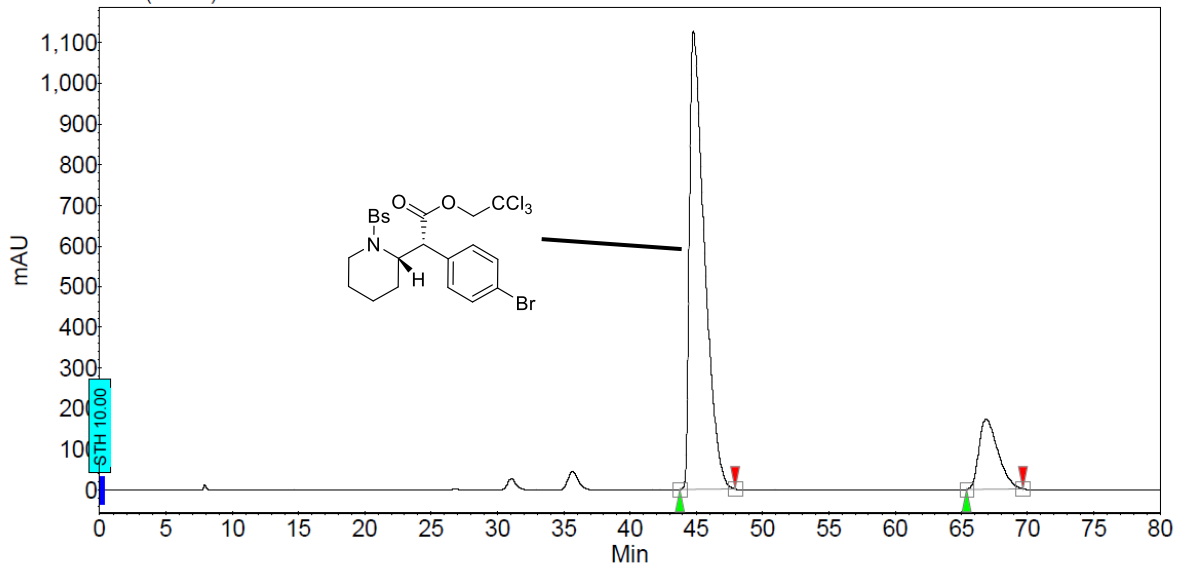

Peak results :

| Index | Name    | Time [Min] | Quantity [% Area] | Height [mAU] | Area [mAU.Min] | Area % [%] |
|-------|---------|------------|-------------------|--------------|----------------|------------|
| 1     | UNKNOWN | 44.79      | 83.71             | 1128.0       | 1476.6         | 83.711     |
| 2     | UNKNOWN | 66.86      | 16.29             | 173.2        | 287.3          | 16.289     |
| Total |         |            | 100.00            | 1301.2       | 1763.9         | 100.000    |

→ 67% ee

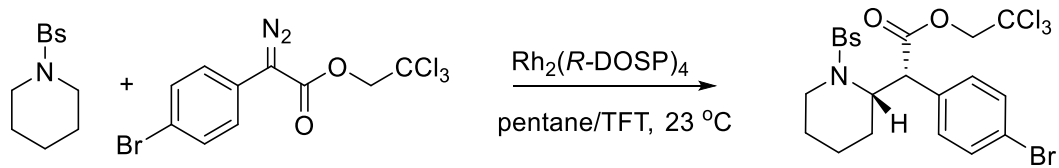

(Table S2, entry 5)

WL-N9-118-C2(f3239)-ADH-0.5-5%-230nm-80min-5.DATA - Prostar 325 Absorbance Channel 2 LC1006M831

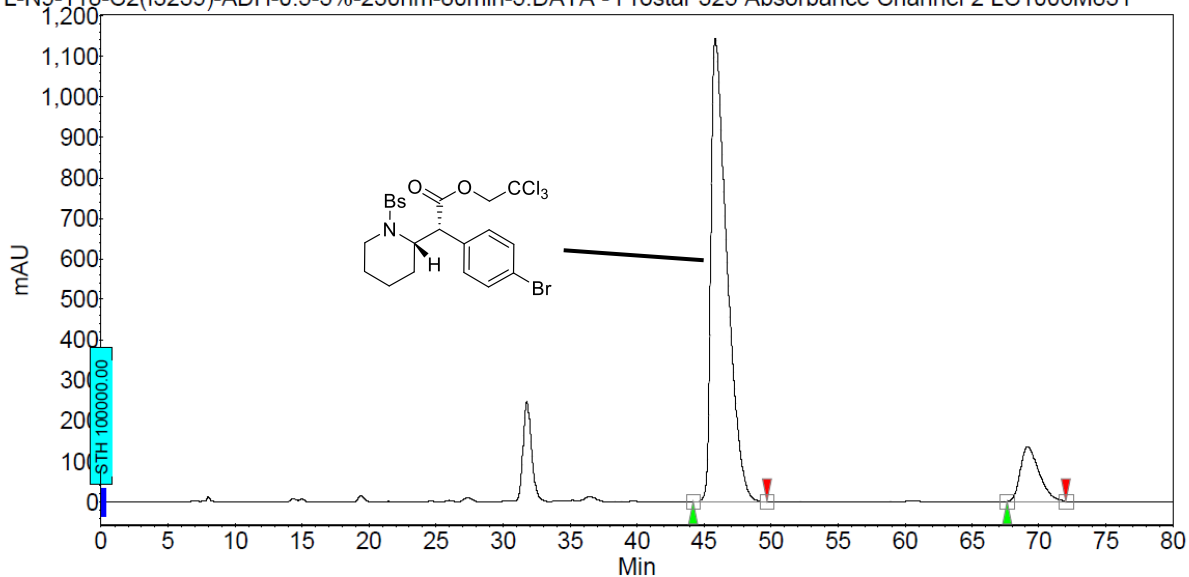

**Peak results :**

| Index | Name    | Time [Min] | Quantity [% Area] | Height [mAU] | Area [mAU.Min] | Area % [%] |
|-------|---------|------------|-------------------|--------------|----------------|------------|
| 1     | UNKNOWN | 45.84      | 87.91             | 1144.2       | 1586.9         | 87.910     |
| 2     | UNKNOWN | 69.15      | 12.09             | 133.8        | 218.2          | 12.090     |
| Total |         |            | 100.00            | 1278.0       | 1805.1         | 100.000    |

→ 76% ee

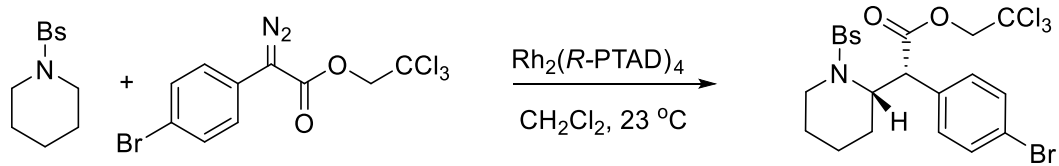

(Table S2, entry 7)

WL-N9-101b-C2(f1326)-ADH-0.5-5%-230nm-80min-2.DATA - Prostar 325 Absorbance Channel 2 LC1006M831

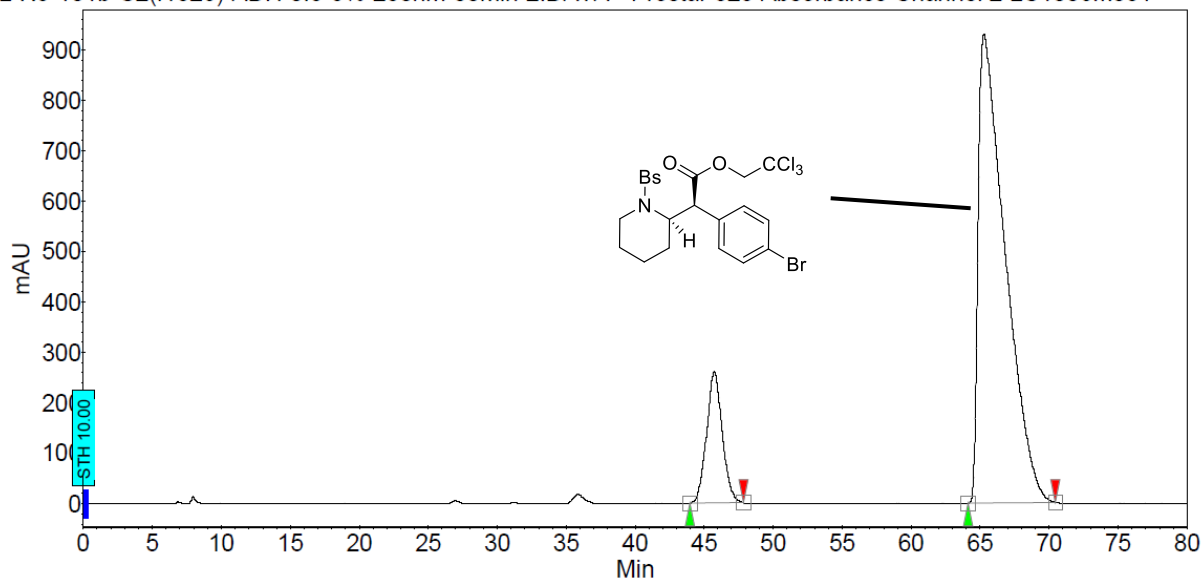

**Peak results :**

| Index | Name    | Time [Min] | Quantity [% Area] | Height [mAU] | Area [mAU.Min] | Area % [%] |
|-------|---------|------------|-------------------|--------------|----------------|------------|
| 1     | UNKNOWN | 45.73      | 14.01             | 261.2        | 343.9          | 14.011     |
| 2     | UNKNOWN | 65.27      | 85.99             | 931.2        | 2110.4         | 85.989     |
| Total |         |            | 100.00            | 1192.3       | 2454.3         | 100.000    |

→ -72% ee

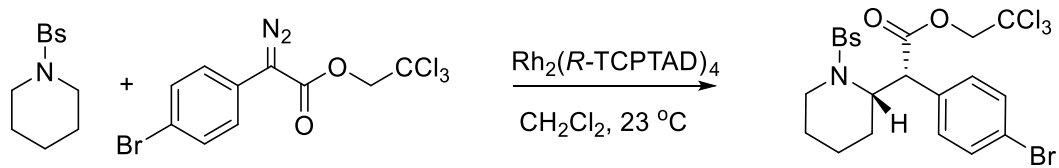

(Table S2, entry 8)

WL-N9-101c-C2(f3032)-ADH-0.5-5%-230nm-80min-32.DATA - Prostar 325 Absorbance Channel 2 LC1006M831

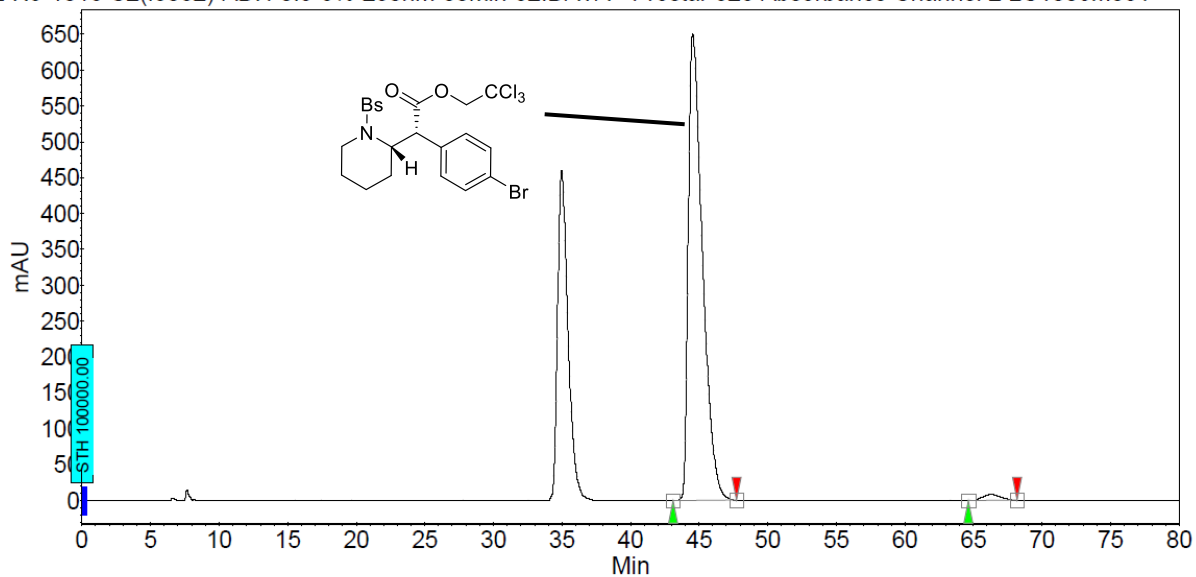

**Peak results :**

| Index | Name    | Time [Min] | Quantity [% Area] | Height [mAU] | Area [mAU.Min] | Area % [%] |
|-------|---------|------------|-------------------|--------------|----------------|------------|
| 1     | UNKNOWN | 44.54      | 98.50             | 650.9        | 776.8          | 98.498     |
| 2     | UNKNOWN | 66.29      | 1.50              | 8.4          | 11.8           | 1.502      |
| Total |         |            | 100.00            | 659.2        | 788.6          | 100.000    |

→ 97% ee

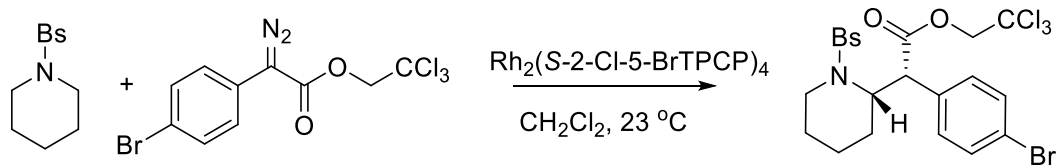

(Table S2, entry 12)

WL-N9-82-C2(f1419)-ADH-0.5-5%-230nm-80min-11.DATA - Prostar 325 Absorbance Channel 2 LC1006M831

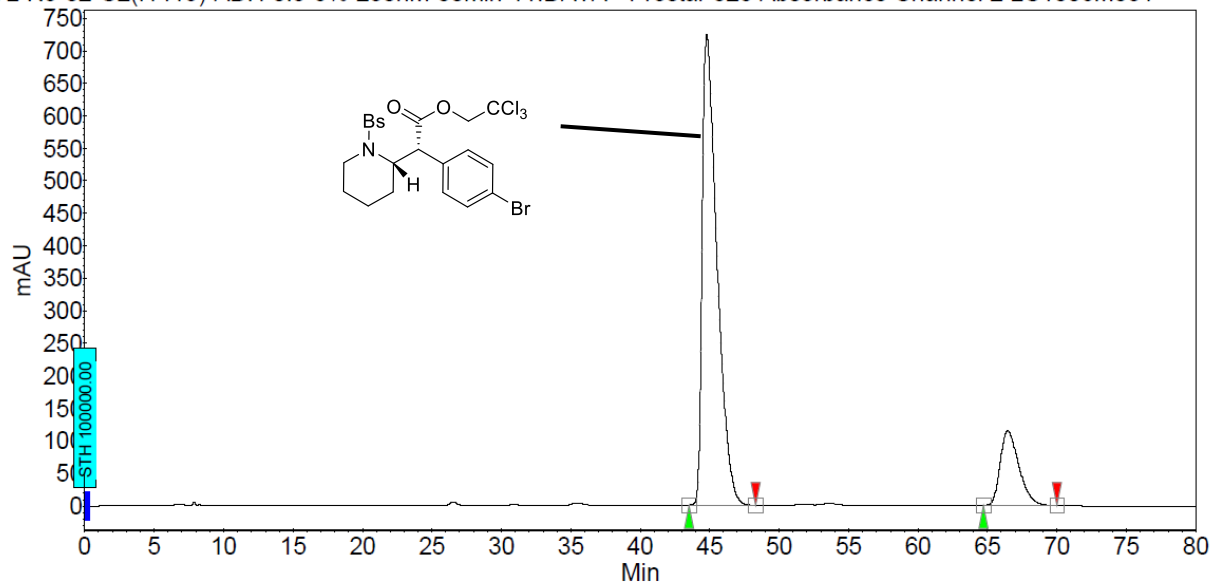

**Peak results :**

| Index | Name    | Time [Min] | Quantity [% Area] | Height [mAU] | Area [mAU.Min] | Area % [%] |
|-------|---------|------------|-------------------|--------------|----------------|------------|
| 1     | UNKNOWN | 44.79      | 83.22             | 724.6        | 893.6          | 83.217     |
| 2     | UNKNOWN | 66.46      | 16.78             | 115.0        | 180.3          | 16.783     |
| Total |         |            | 100.00            | 839.6        | 1074.1         | 100.000    |

→ 66% ee

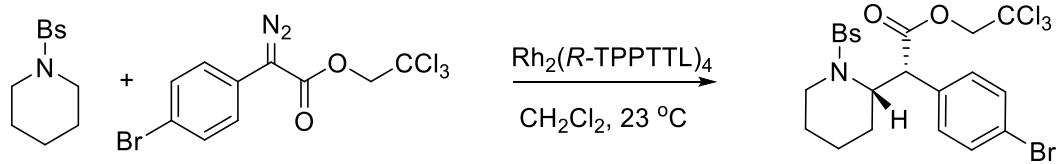

(Table 1, entry 9) (Table S2, entry 13)

WL-N9-93c-C2(f2232)-ADH-0.5-5%-230nm-80min-8.DATA - Prostar 325 Absorbance Channel 2 LC1006M831

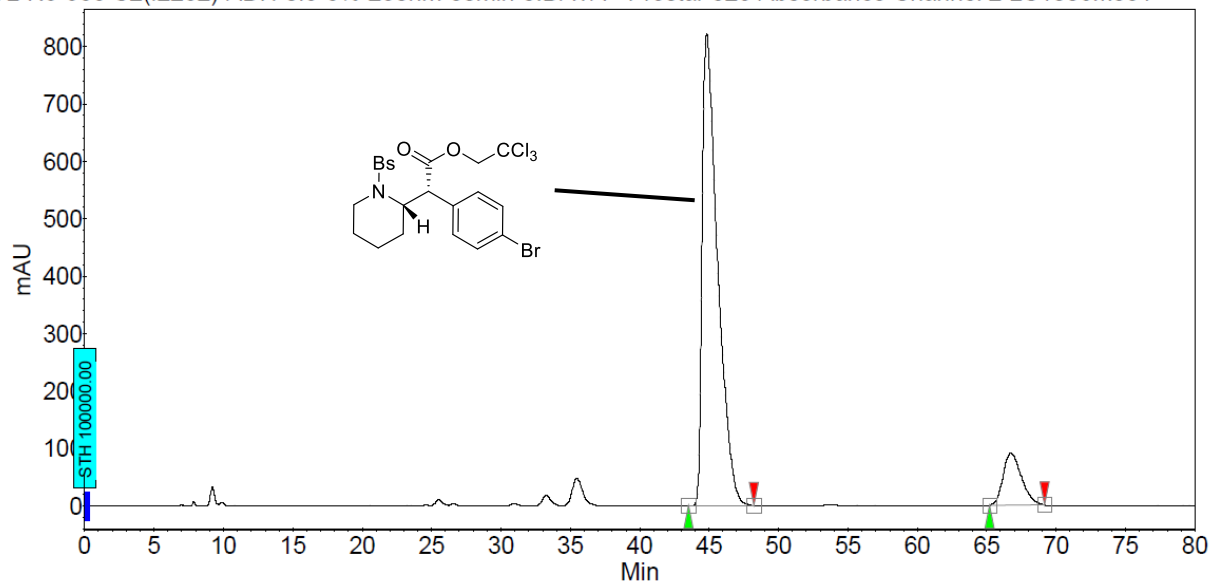

**Peak results :**

| Index | Name    | Time [Min] | Quantity [% Area] | Height [mAU] | Area [mAU.Min] | Area % [%] |
|-------|---------|------------|-------------------|--------------|----------------|------------|
| 1     | UNKNOWN | 44.82      | 88.40             | 822.6        | 1054.3         | 88.399     |
| 2     | UNKNOWN | 66.73      | 11.60             | 90.8         | 138.4          | 11.601     |
| Total |         |            | 100.00            | 913.4        | 1192.7         | 100.000    |

→ 77% ee



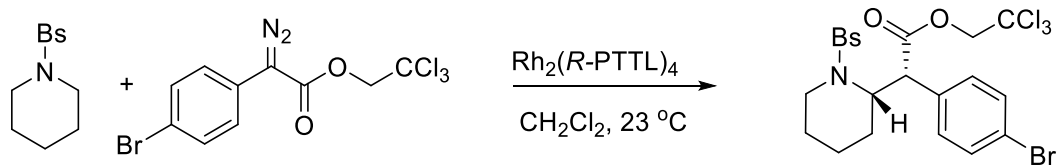

(Table S2, entry 14)

WL-N9-101h-C2(f1728)-ADH-0.5-5%-230nm-80min-5.DATA - Prostar 325 Absorbance Channel 2 LC1006M831

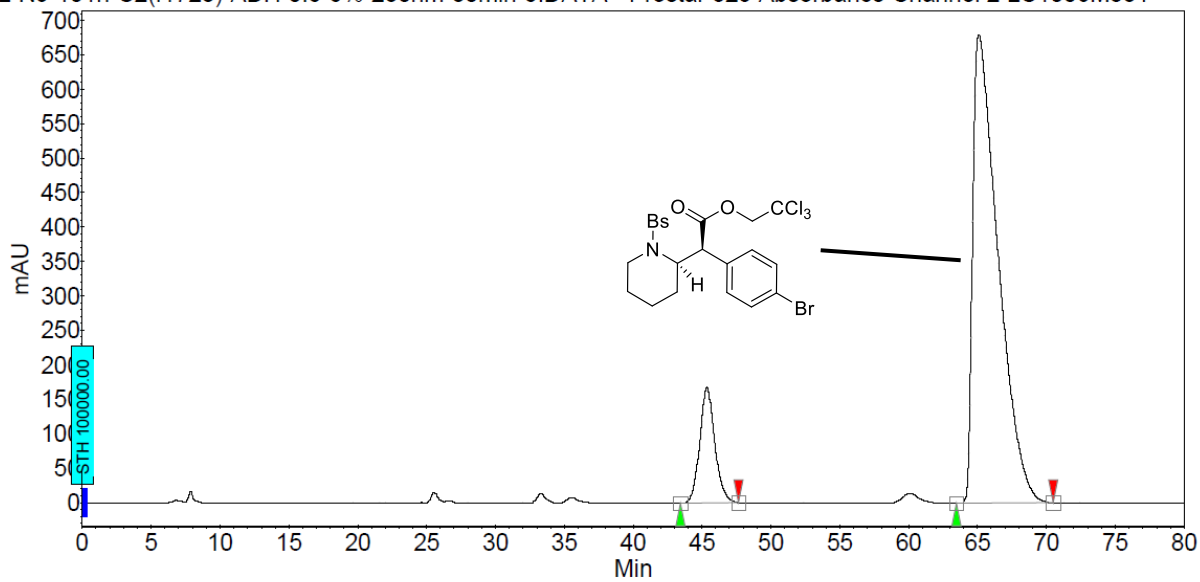

**Peak results :**

| Index | Name    | Time [Min] | Quantity [% Area] | Height [mAU] | Area [mAU.Min] | Area % [%] |
|-------|---------|------------|-------------------|--------------|----------------|------------|
| 1     | UNKNOWN | 45.34      | 12.78             | 167.7        | 212.3          | 12.780     |
| 2     | UNKNOWN | 65.10      | 87.22             | 679.5        | 1448.6         | 87.220     |
| Total |         |            | 100.00            | 847.3        | 1660.9         | 100.000    |

→ -74% ee

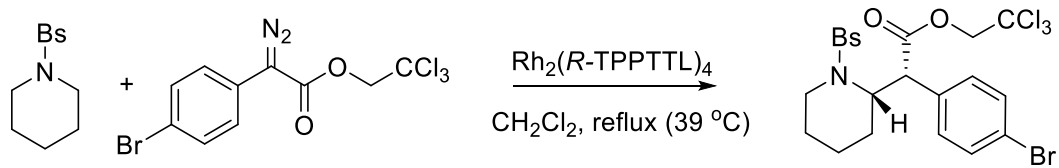

(Table 1, entry 10) (Table S2, entry 15)

WL-N9-149-C2(f1733)-ADH-0.5-5%-230nm-80min-24.DATA - Prostar 325 Absorbance Channel 2 LC1006M831

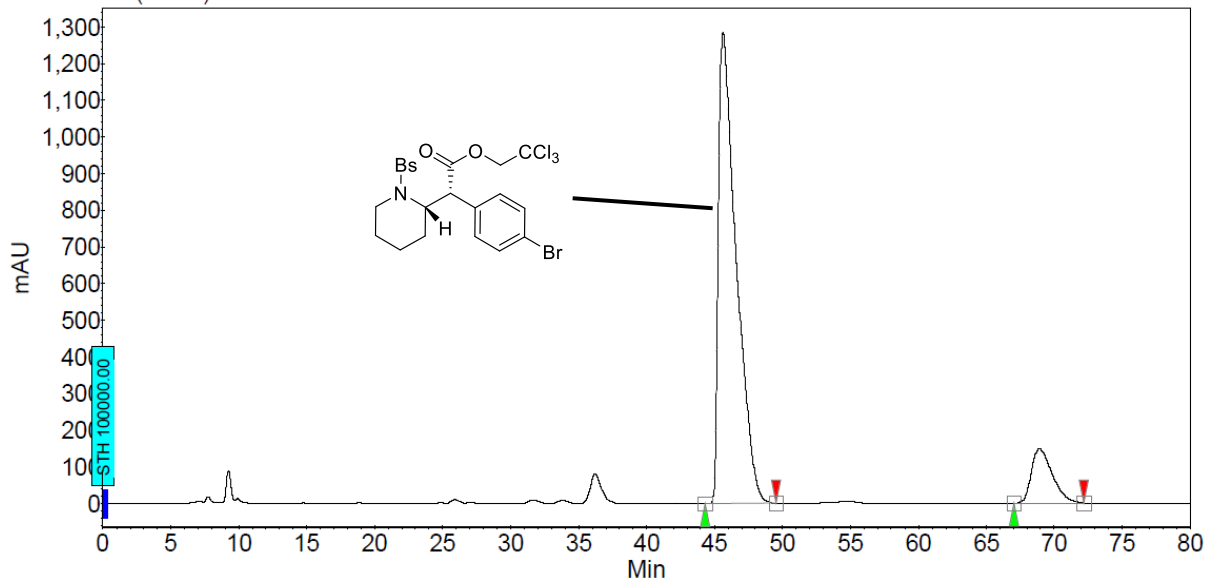

**Peak results :**

| Index | Name    | Time [Min] | Quantity [% Area] | Height [mAU] | Area [mAU.Min] | Area % [%] |
|-------|---------|------------|-------------------|--------------|----------------|------------|
| 1     | UNKNOWN | 45.62      | 88.17             | 1284.5       | 1947.8         | 88.166     |
| 2     | UNKNOWN | 68.90      | 11.83             | 148.4        | 261.4          | 11.834     |
| Total |         |            | 100.00            | 1432.9       | 2209.2         | 100.000    |

→ 76% ee

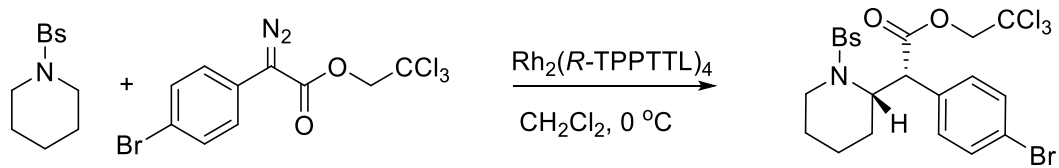

(Table 1, entry 11) (Table S2, entry 16)

WL-N9-150-C2(f1216)-ADH-0.5-5%-230nm-80min-17.DATA - Prostar 325 Absorbance Channel 2 LC1006M831

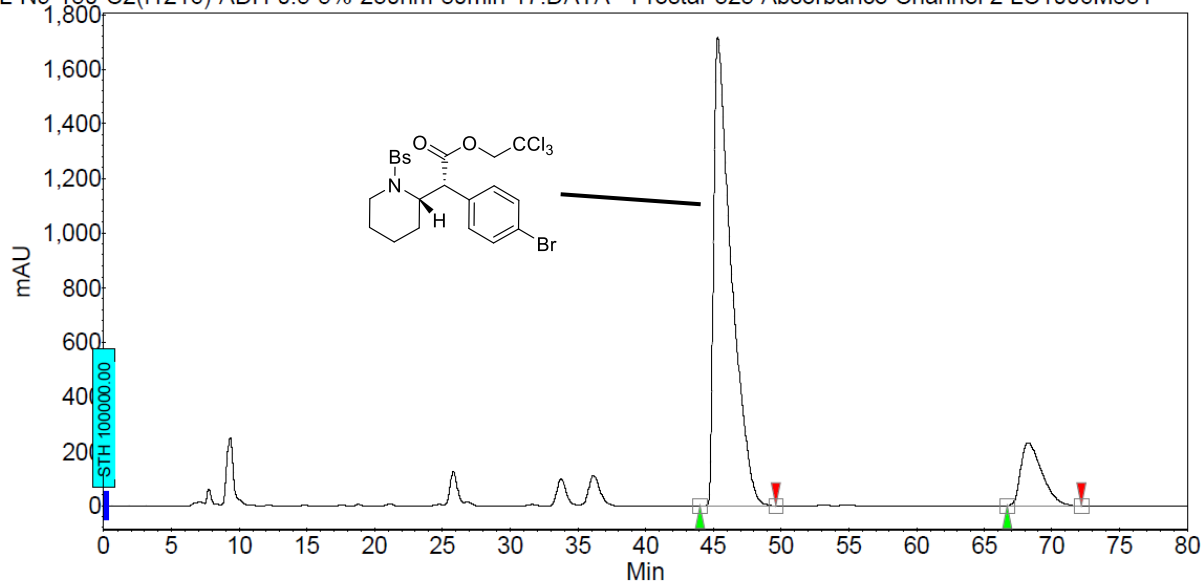

**Peak results :**

| Index | Name    | Time [Min] | Quantity [% Area] | Height [mAU] | Area [mAU.Min] | Area % [%] |
|-------|---------|------------|-------------------|--------------|----------------|------------|
| 1     | UNKNOWN | 45.34      | 86.17             | 1716.9       | 2585.7         | 86.172     |
| 2     | UNKNOWN | 68.25      | 13.83             | 230.4        | 414.9          | 13.828     |
| Total |         |            | 100.00            | 1947.3       | 3000.6         | 100.000    |

→ 72% ee

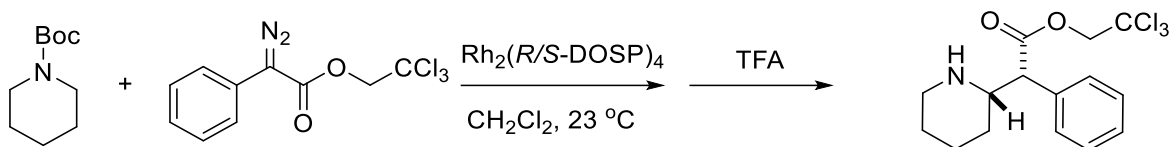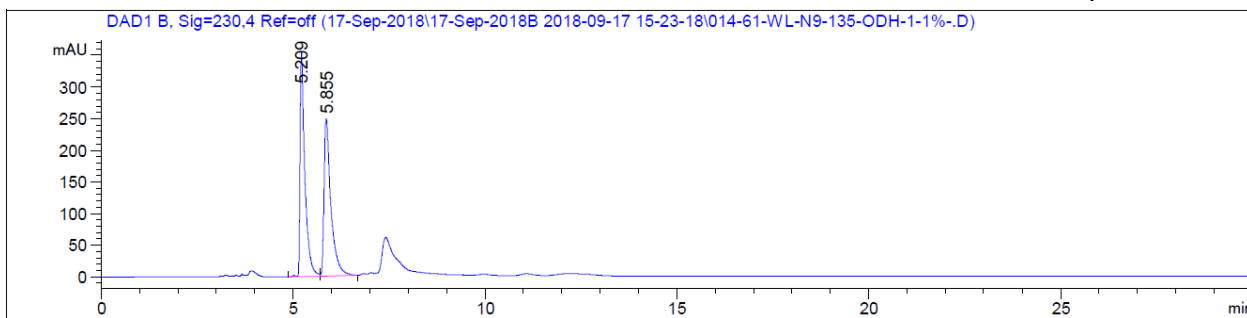

Signal 2: DAD1 B, Sig=230,4 Ref=off

| Peak # | RetTime [min] | Type | Width [min] | Area [mAU*s] | Height [mAU] | Area %  |
|--------|---------------|------|-------------|--------------|--------------|---------|
| 1      | 5.209         | VV R | 0.1239      | 3096.28467   | 355.06827    | 50.2465 |
| 2      | 5.855         | VB   | 0.1778      | 3065.90723   | 248.70621    | 49.7535 |

Racemic standard

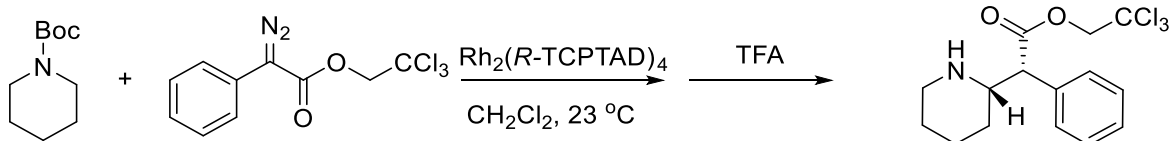

(Scheme 2, 5b)

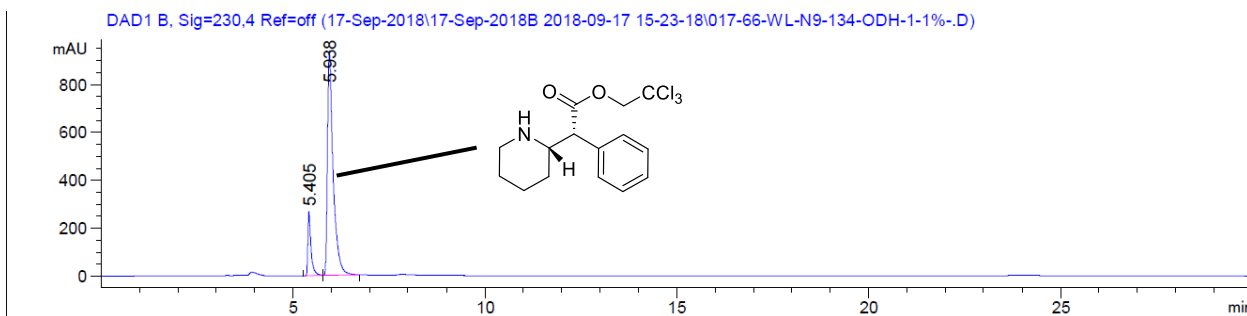

Signal 2: DAD1 B, Sig=230,4 Ref=off

| Peak # | RetTime [min] | Type | Width [min] | Area [mAU*s] | Height [mAU] | Area %  |
|--------|---------------|------|-------------|--------------|--------------|---------|
| 1      | 5.405         | BV   | 0.0828      | 1545.78625   | 269.88885    | 13.6917 |
| 2      | 5.938         | VB   | 0.1506      | 9744.19141   | 938.77661    | 86.3083 |

Totals : 1.12900e4 1208.66547 → 73% ee

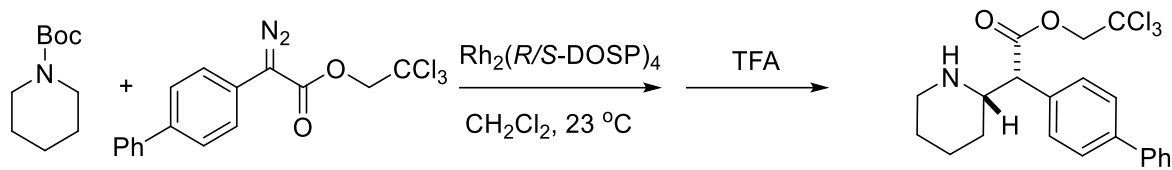

WL-N9-137-COCF3-rac-ADH-1-3%-230nm-40min-2.DATA - Prostar 325 Absorbance Channel 2 LC1006M831

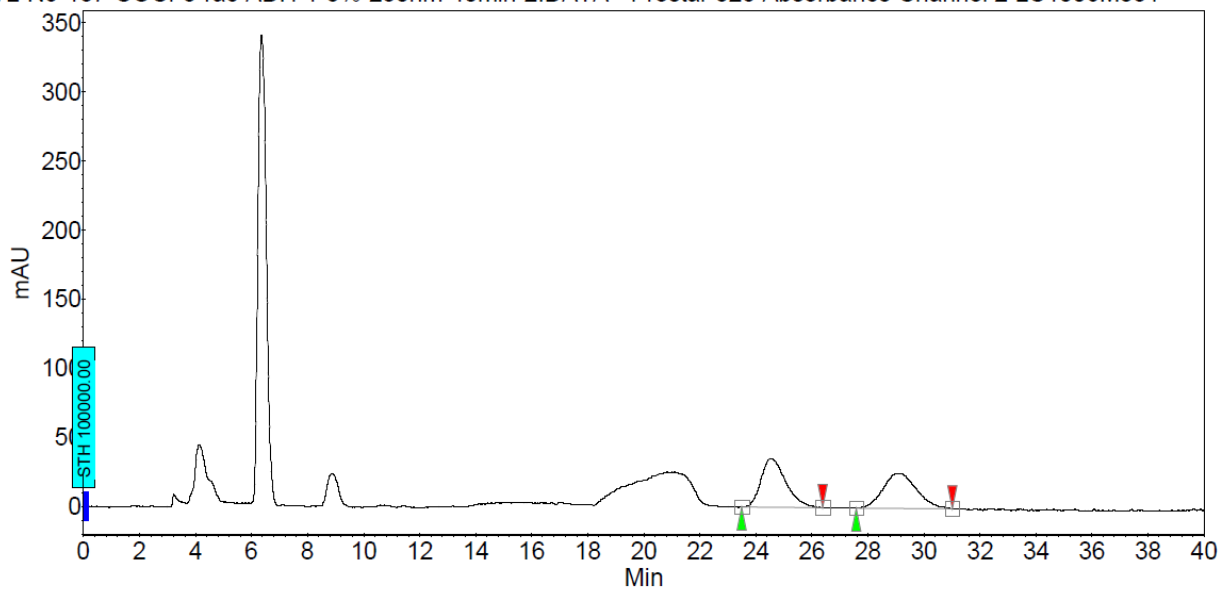

**Peak results :**

| Index | Name    | Time [Min] | Quantity [% Area] | Height [mAU] | Area [mAU.Min] | Area % [%] |
|-------|---------|------------|-------------------|--------------|----------------|------------|
| 1     | UNKNOWN | 24.54      | 50.97             | 35.4         | 36.2           | 50.967     |
| 2     | UNKNOWN | 29.05      | 49.03             | 25.4         | 34.8           | 49.033     |
| Total |         |            | 100.00            | 60.8         | 71.0           | 100.000    |

Racemic standard

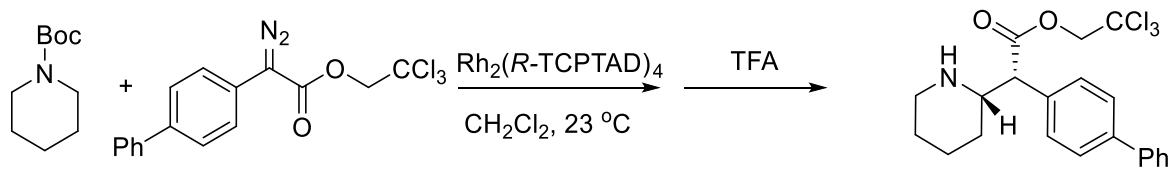

(Scheme 2, **5c**)

WL-N9-136-COCF3-ADH-1-3%-230nm-40min-5.DATA - Prostar 325 Absorbance Channel 2 LC1006M831

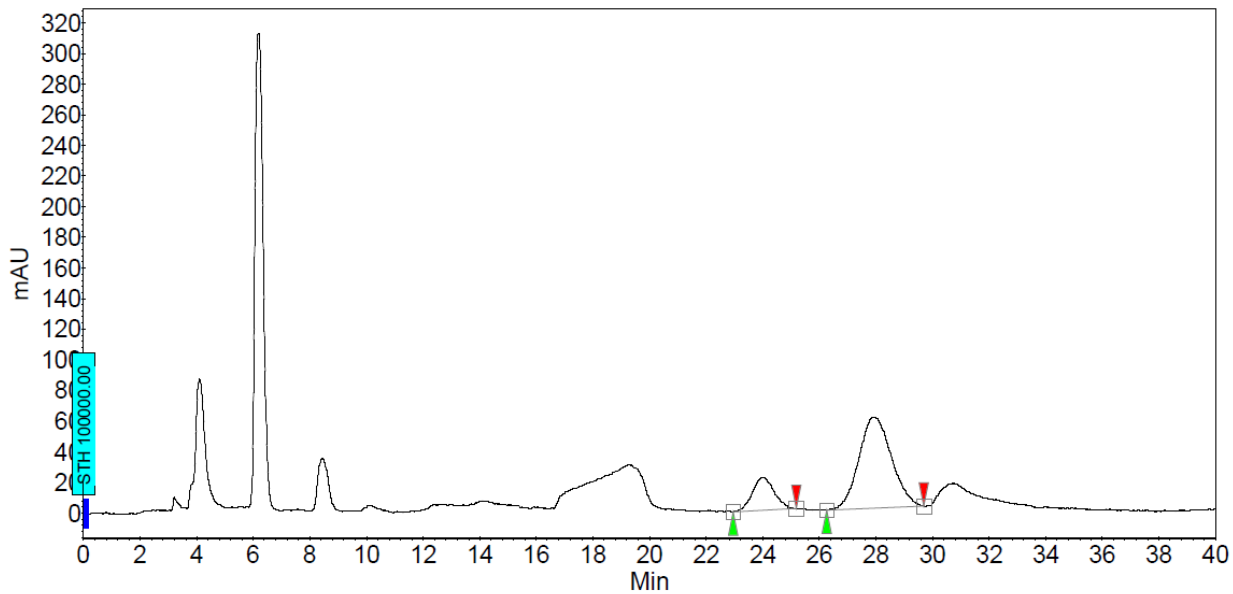

**Peak results :**

| Index | Name    | Time [Min] | Quantity [% Area] | Height [mAU] | Area [mAU.Min] | Area % [%] |
|-------|---------|------------|-------------------|--------------|----------------|------------|
| 1     | UNKNOWN | 23.99      | 19.43             | 21.2         | 19.1           | 19.432     |
| 2     | UNKNOWN | 27.95      | 80.57             | 59.4         | 79.4           | 80.568     |
| Total |         |            | 100.00            | 80.6         | 98.5           | 100.000    |

→ 61% ee

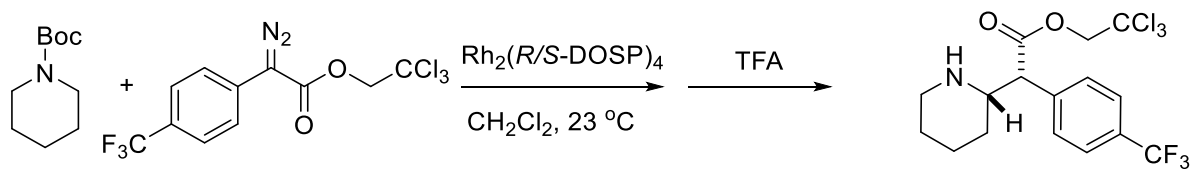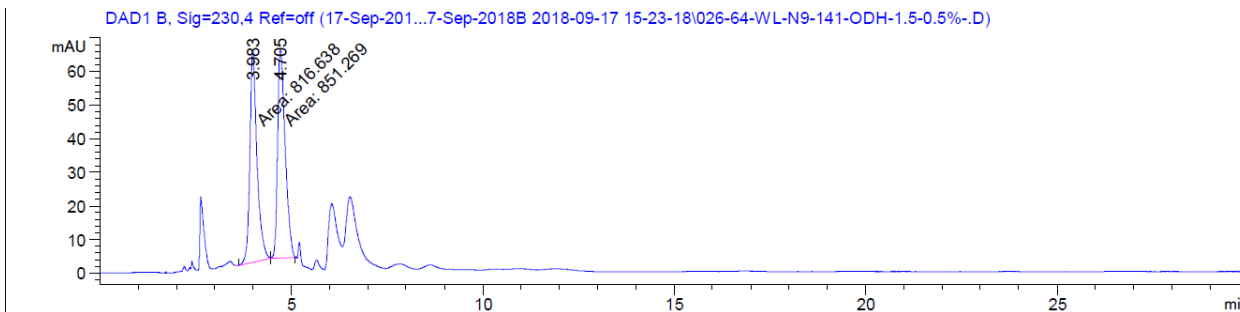

Signal 2: DAD1 B, Sig=230,4 Ref=off

| Peak # | RetTime [min] | Type | Width [min] | Area [mAU*s] | Height [mAU] | Area %  |
|--------|---------------|------|-------------|--------------|--------------|---------|
| 1      | 3.983         | MM   | 0.2167      | 816.63812    | 62.82038     | 48.9619 |
| 2      | 4.705         | MM   | 0.2280      | 851.26880    | 62.21785     | 51.0381 |

Totals : 1667.90692 125.03823

Racemic standard

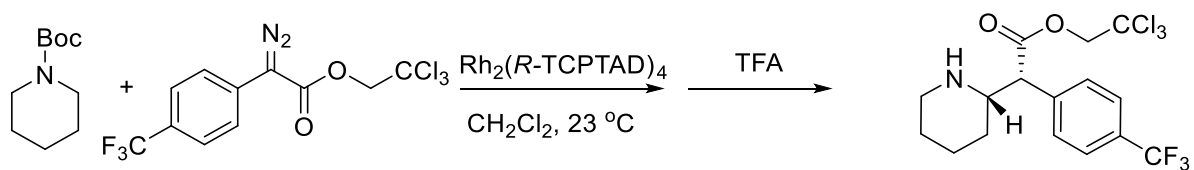

(Scheme 2, 5d)

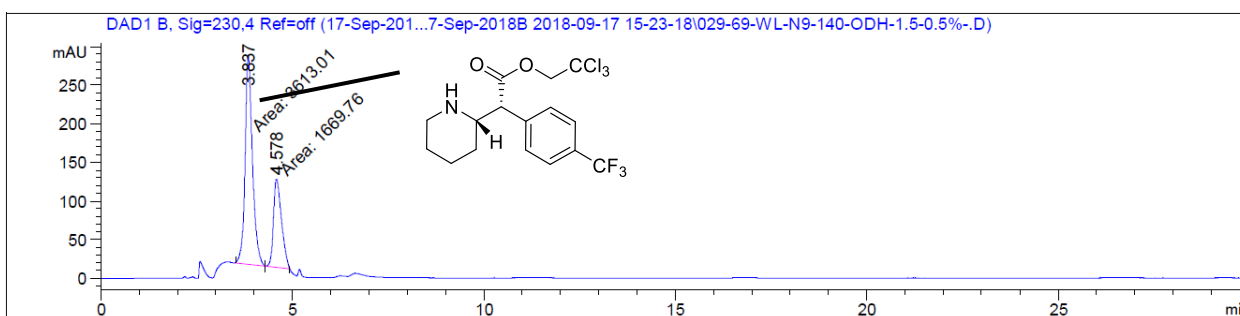

Signal 2: DAD1 B, Sig=230,4 Ref=off

| Peak # | RetTime [min] | Type | Width [min] | Area [mAU*s] | Height [mAU] | Area %  |
|--------|---------------|------|-------------|--------------|--------------|---------|
| 1      | 3.837         | MM   | 0.2216      | 3613.00537   | 271.69388    | 68.3923 |
| 2      | 4.578         | MM   | 0.2435      | 1669.76270   | 114.30554    | 31.6077 |

Totals : 5282.76807 385.99942

→ 37% ee

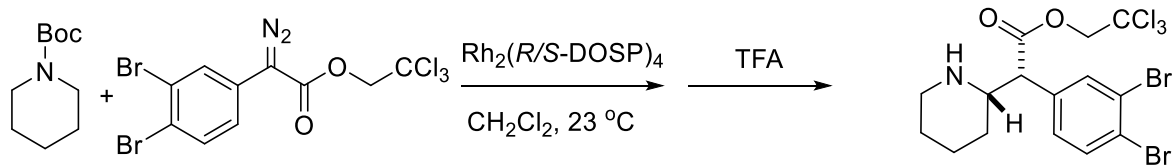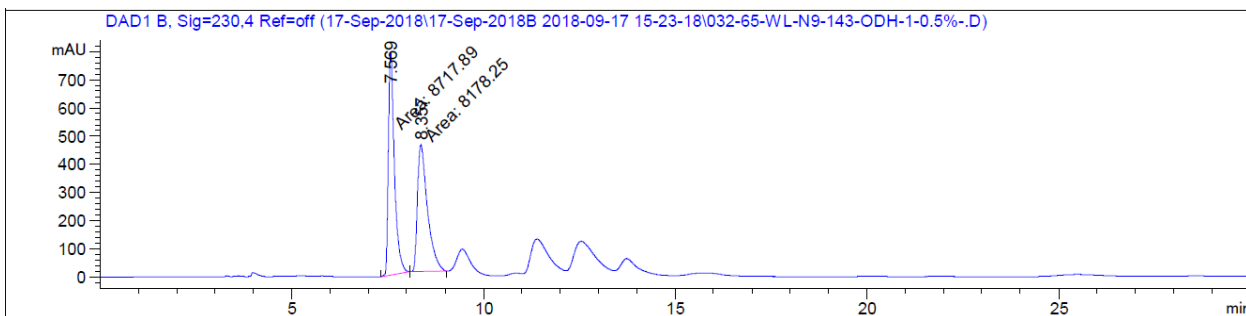

Signal 2: DAD1 B, Sig=230,4 Ref=off

| Peak # | RetTime [min] | Type | Width [min] | Area [mAU*s] | Height [mAU] | Area %  |
|--------|---------------|------|-------------|--------------|--------------|---------|
| 1      | 7.569         | MM   | 0.1831      | 8717.88770   | 793.48718    | 51.5969 |
| 2      | 8.357         | MM   | 0.3031      | 8178.25439   | 449.75534    | 48.4031 |

Totals : 1.68961e4 1243.24252

Racemic standard

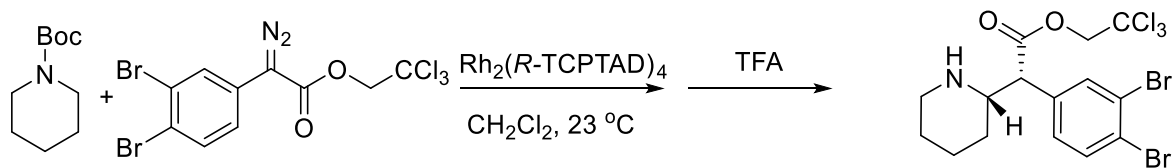

(Scheme 2, 5e)

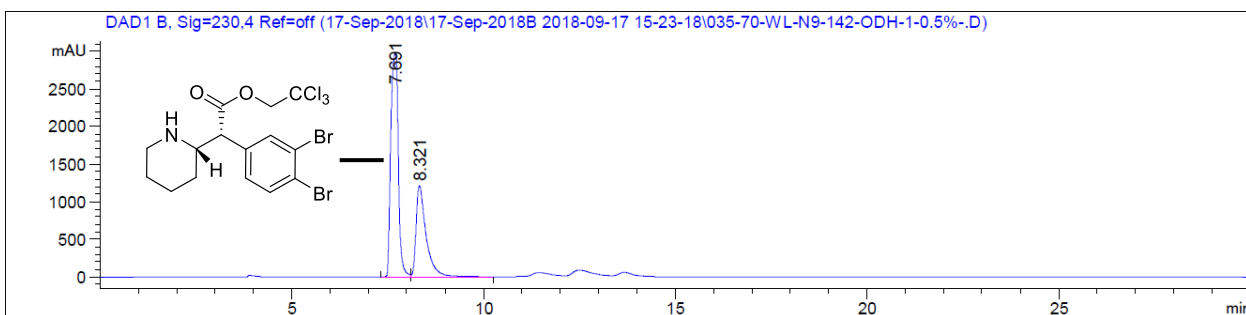

Signal 2: DAD1 B, Sig=230,4 Ref=off

| Peak # | RetTime [min] | Type | Width [min] | Area [mAU*s] | Height [mAU] | Area %  |
|--------|---------------|------|-------------|--------------|--------------|---------|
| 1      | 7.691         | BV   | 0.1630      | 4.04701e4    | 2978.64307   | 64.6349 |
| 2      | 8.321         | VB   | 0.2655      | 2.21433e4    | 1212.97864   | 35.3651 |

Totals : 6.26134e4 4191.62170

→ 29% ee



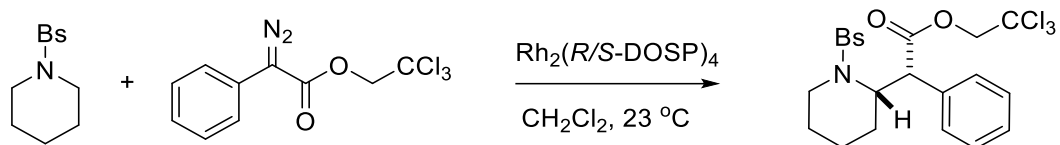

WL-ELN-0009-10H-C2-ODH-0.6-2%-230nm-60min-65.DATA - Prostar 325 Absorbance Channel 2 LC1006M831

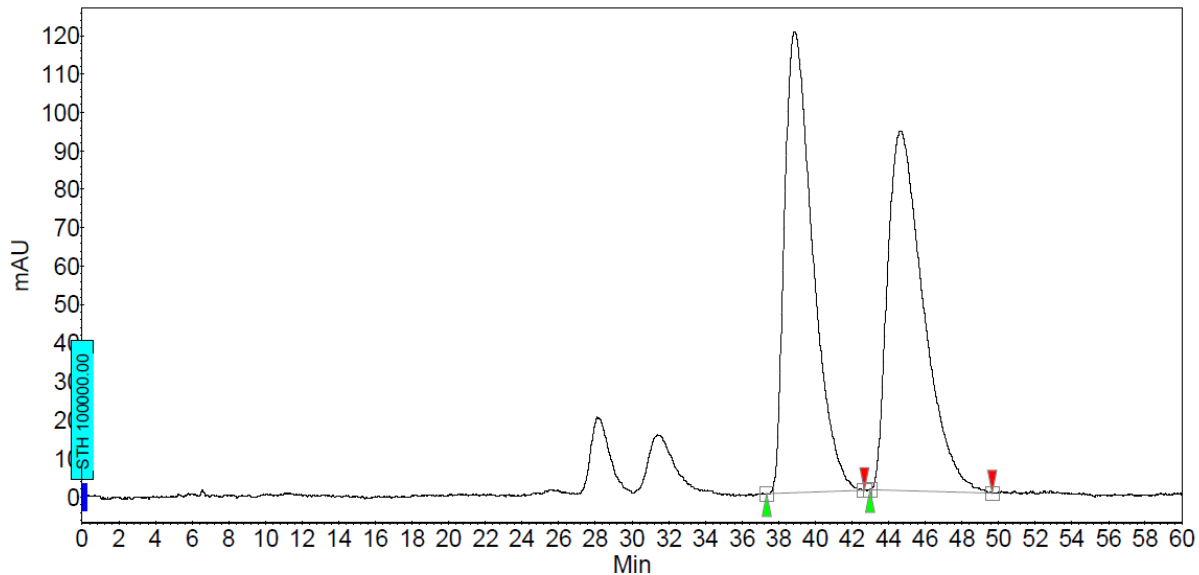

**Peak results :**

| Index | Name    | Time [Min] | Quantity [% Area] | Height [mAU] | Area [mAU.Min] | Area % [%] |
|-------|---------|------------|-------------------|--------------|----------------|------------|
| 1     | UNKNOWN | 38.87      | 50.27             | 119.9        | 213.6          | 50.267     |
| 2     | UNKNOWN | 44.65      | 49.73             | 93.5         | 211.3          | 49.733     |
| Total |         |            | 100.00            | 213.3        | 424.9          | 100.000    |

Racemic standard

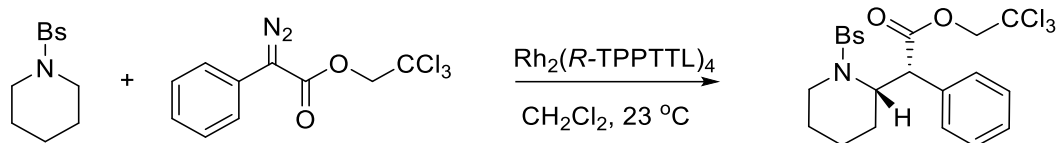

(Scheme 2, **6b**)

WL-ELN-0009-09H-C2(f1118)-ODH-0.6-2%-230nm-60min-2.DATA - Prostar 325 Absorbance Channel 2 LC1006M831

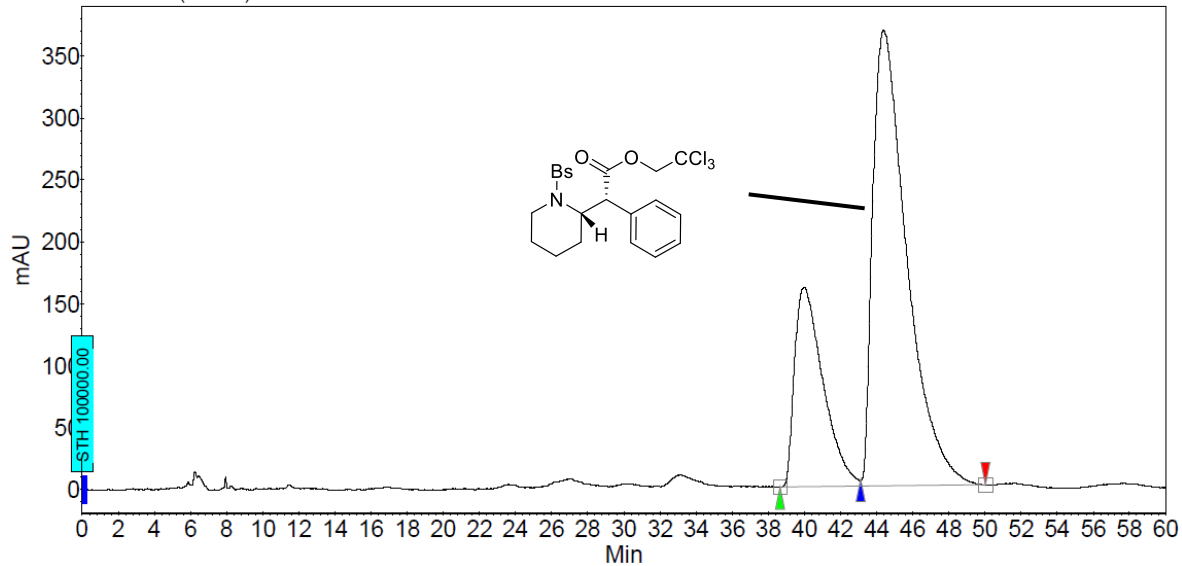

**Peak results :**

| Index | Name    | Time [Min] | Quantity [% Area] | Height [mAU] | Area [mAU.Min] | Area % [%] |
|-------|---------|------------|-------------------|--------------|----------------|------------|
| 1     | UNKNOWN | 39.97      | 26.79             | 161.3        | 294.8          | 26.792     |
| 2     | UNKNOWN | 44.38      | 73.21             | 368.4        | 805.4          | 73.208     |
| Total |         |            | 100.00            | 529.7        | 1100.2         | 100.000    |

→ 46% ee

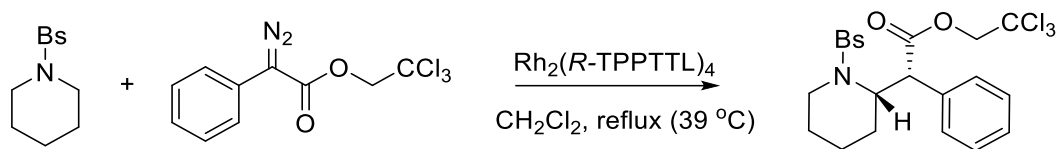

(Scheme 2, **6b**)

WL-ELN-0009-21H-C2(f3032)-ODH-0.6-2%-230nm-60min-5.DATA - Prostar 325 Absorbance Channel 2 LC1006M831

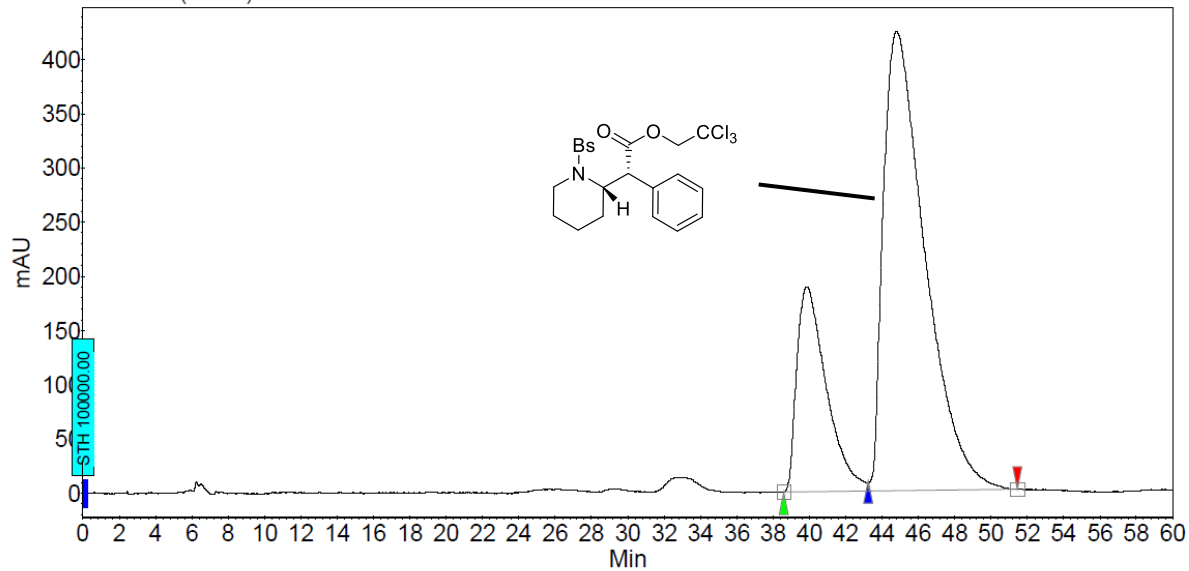

**Peak results :**

| Index | Name    | Time [Min] | Quantity [% Area] | Height [mAU] | Area [mAU.Min] | Area % [%] |
|-------|---------|------------|-------------------|--------------|----------------|------------|
| 1     | UNKNOWN | 39.84      | 24.03             | 189.2        | 356.3          | 24.030     |
| 2     | UNKNOWN | 44.79      | 75.97             | 423.9        | 1126.5         | 75.970     |
| Total |         |            | 100.00            | 613.1        | 1482.9         | 100.000    |

→ 52% ee

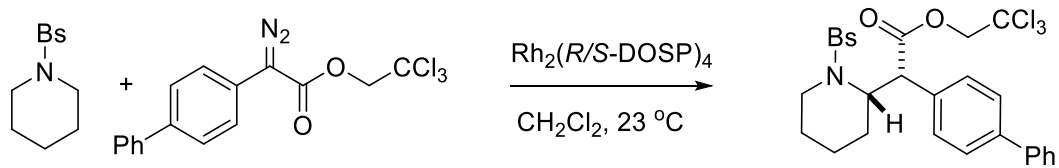

WL-ELN-0009-12Ph-rac-1-10%-230nm-60min-80.DATA - Prostar 325 Absorbance Channel 2 LC1006M831

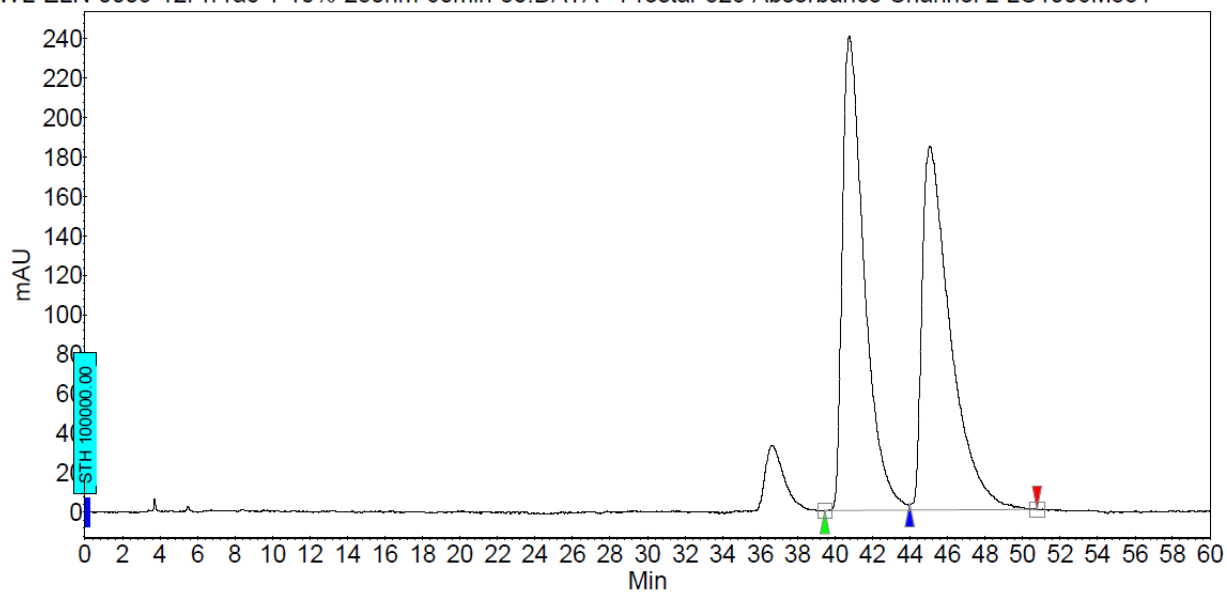

**Peak results :**

| Index | Name    | Time [Min] | Quantity [% Area] | Height [mAU] | Area [mAU.Min] | Area % [%] |
|-------|---------|------------|-------------------|--------------|----------------|------------|
| 1     | UNKNOWN | 40.75      | 50.12             | 240.8        | 325.1          | 50.124     |
| 2     | UNKNOWN | 45.05      | 49.88             | 184.7        | 323.5          | 49.876     |
| Total |         |            | 100.00            | 425.5        | 648.5          | 100.000    |

Racemic Standard

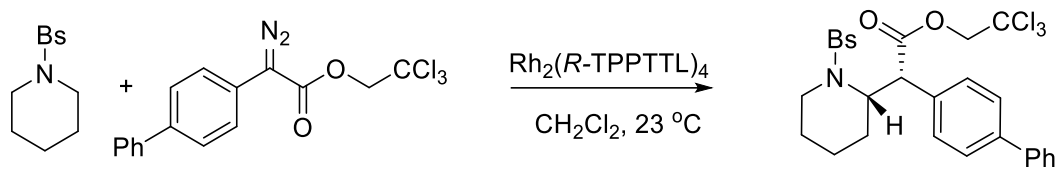

(Scheme 2, **6c**)

WL-ELN-0009-11Ph-chiral-1-10%-230nm-60min-83.DATA - Prostar 325 Absorbance Channel 2 LC1006M831

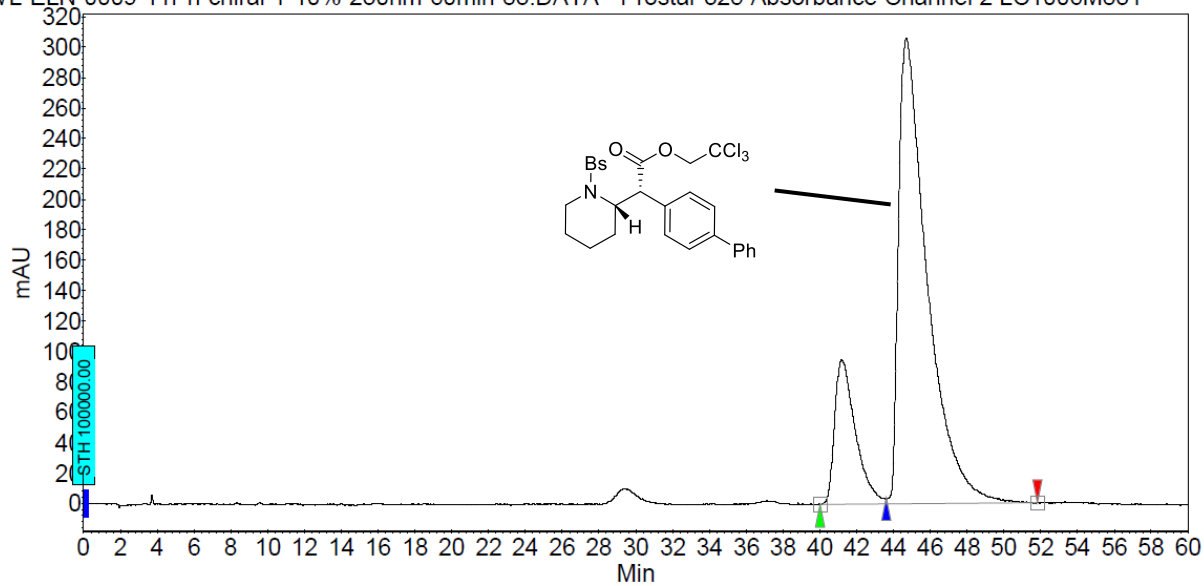

**Peak results :**

| Index | Name    | Time [Min] | Quantity [% Area] | Height [mAU] | Area [mAU.Min] | Area % [%] |
|-------|---------|------------|-------------------|--------------|----------------|------------|
| 1     | UNKNOWN | 41.19      | 18.37             | 94.8         | 124.2          | 18.365     |
| 2     | UNKNOWN | 44.69      | 81.63             | 306.2        | 552.2          | 81.635     |
| Total |         |            | 100.00            | 401.0        | 676.4          | 100.000    |

→ 63% ee

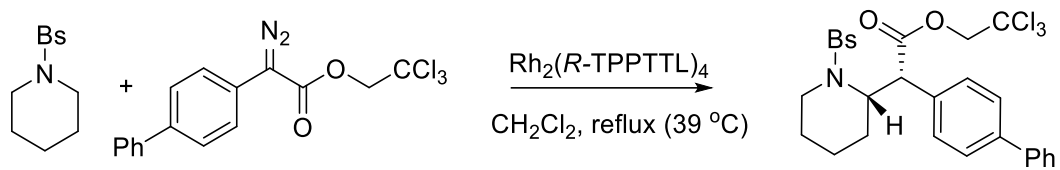

(Scheme 2, **6c**)

WL-ELN-0009-22-Ph-C2-newRRW-1-10%-230nm-60min-7.DATA - Prostar 325 Absorbance Channel 2 LC1006M831

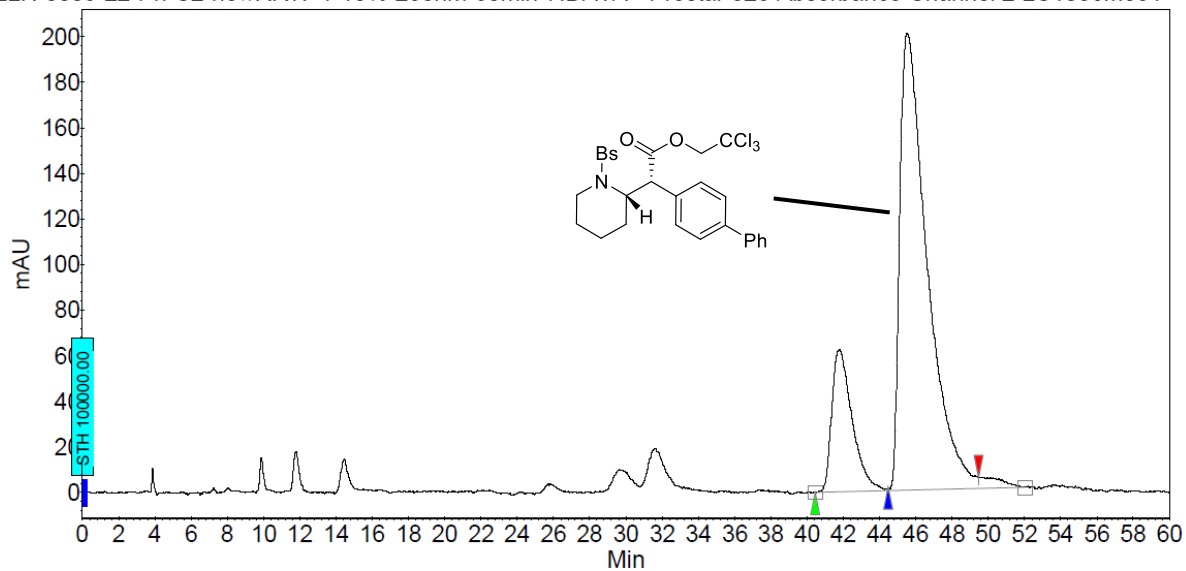

**Peak results :**

| Index | Name    | Time [Min] | Quantity [% Area] | Height [mAU] | Area [mAU.Min] | Area % [%] |
|-------|---------|------------|-------------------|--------------|----------------|------------|
| 1     | UNKNOWN | 41.77      | 18.86             | 62.5         | 81.9           | 18.861     |
| 2     | UNKNOWN | 45.52      | 81.14             | 200.5        | 352.1          | 81.139     |
| Total |         |            | 100.00            | 263.0        | 434.0          | 100.000    |

→ 62% ee

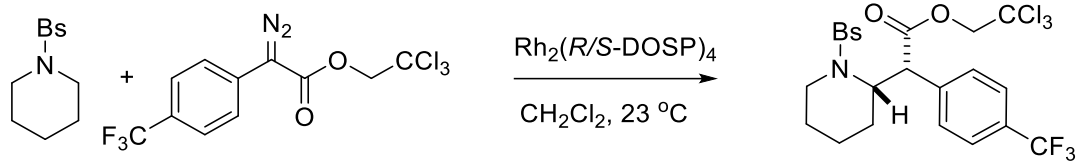

WL-ELN-0009-14CF3-C2-ADH-1-5%-230nm-40min-9.DATA - Prostar 325 Absorbance Channel 2 LC1006M831

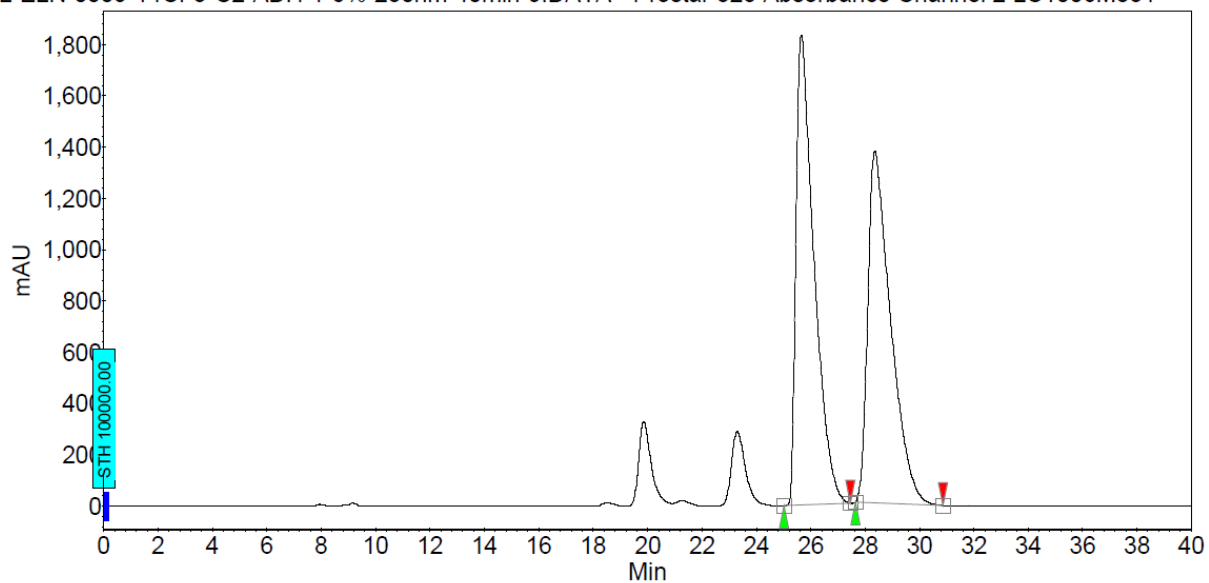

**Peak results :**

| Index | Name    | Time [Min] | Quantity [% Area] | Height [mAU] | Area [mAU.Min] | Area % [%] |
|-------|---------|------------|-------------------|--------------|----------------|------------|
| 1     | UNKNOWN | 25.66      | 51.41             | 1833.7       | 1411.2         | 51.406     |
| 2     | UNKNOWN | 28.36      | 48.59             | 1373.8       | 1334.0         | 48.594     |
| Total |         |            | 100.00            | 3207.4       | 2745.1         | 100.000    |

Racemic standard

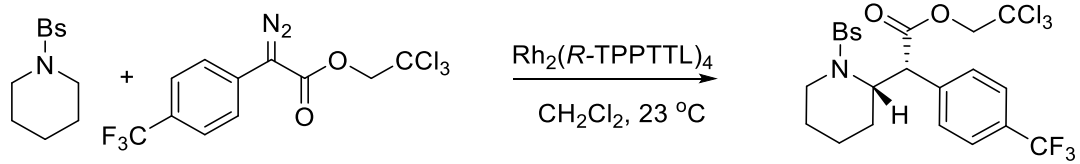

(Scheme 2, **6d**)

WL-ELN-0009-13CF3-C2(f0713)-ADH-1-5%-230nm-40min-6.DATA - Prostar 325 Absorbance Channel 2 LC1006M831

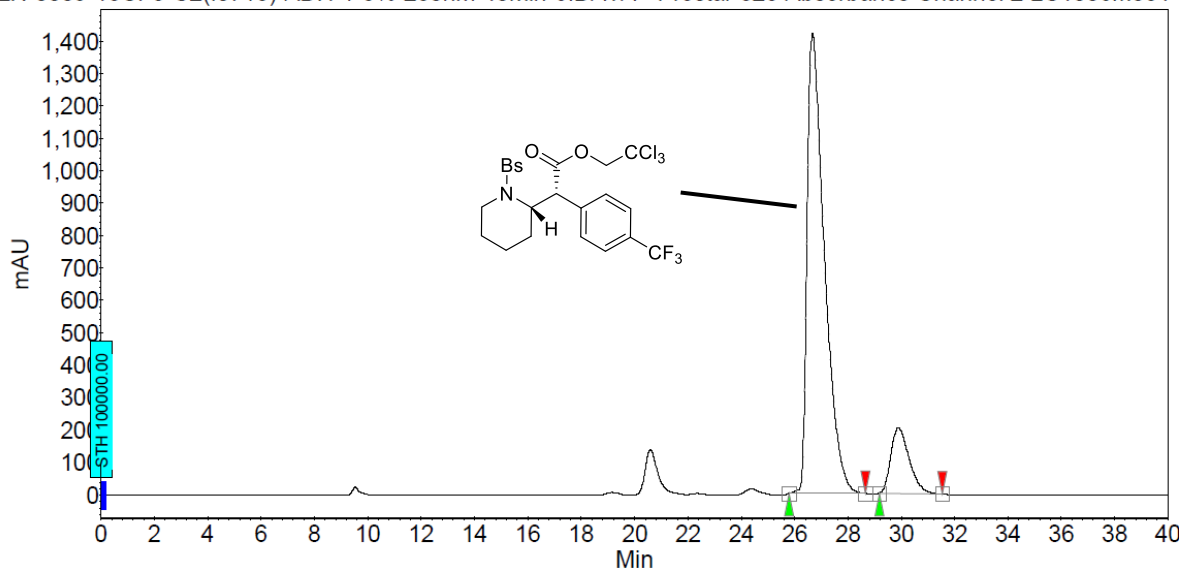

**Peak results :**

| Index | Name    | Time [Min] | Quantity [% Area] | Height [mAU] | Area [mAU.Min] | Area % [%] |
|-------|---------|------------|-------------------|--------------|----------------|------------|
| 1     | UNKNOWN | 26.67      | 86.83             | 1421.3       | 1069.7         | 86.831     |
| 2     | UNKNOWN | 29.89      | 13.17             | 202.9        | 162.2          | 13.169     |
| Total |         |            | 100.00            | 1624.1       | 1232.0         | 100.000    |

→ 74% ee



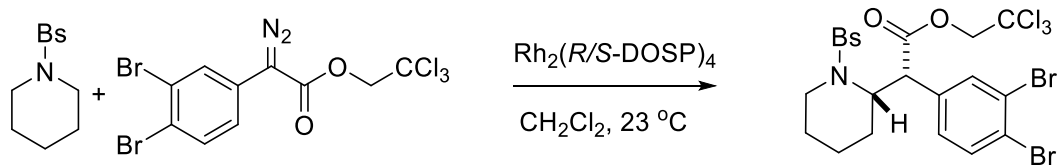

WL-ELN-0009-16diBr-C2-ADH-1-5%-230nm-60min-12.DATA - Prostar 325 Absorbance Channel 2 LC1006M831

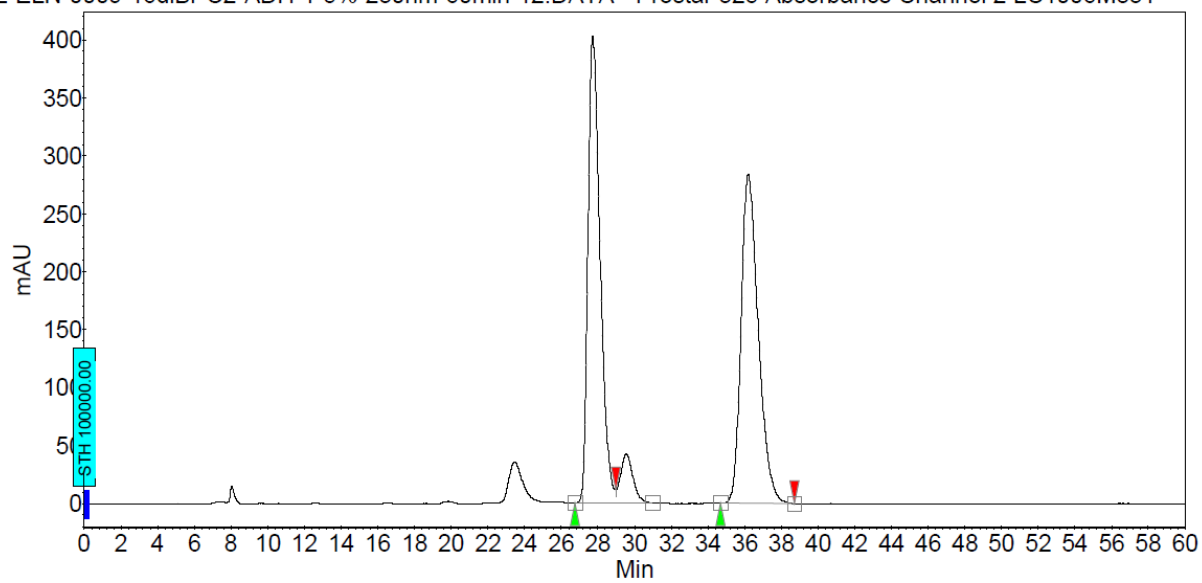

**Peak results :**

| Index | Name    | Time [Min] | Quantity [% Area] | Height [mAU] | Area [mAU.Min] | Area % [%] |
|-------|---------|------------|-------------------|--------------|----------------|------------|
| 1     | UNKNOWN | 27.72      | 50.09             | 402.7        | 309.3          | 50.086     |
| 2     | UNKNOWN | 36.19      | 49.91             | 283.9        | 308.3          | 49.914     |
| Total |         |            | 100.00            | 686.6        | 617.6          | 100.000    |

Racemic standard

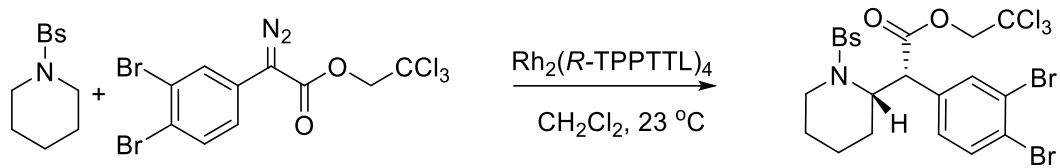

(Scheme 2, **6e**)

WL-ELN-0009-15diBr-C2(f2128)-ADH-1-5%-230nm-60min-3.DATA - Prostar 325 Absorbance Channel 2 LC1006M831

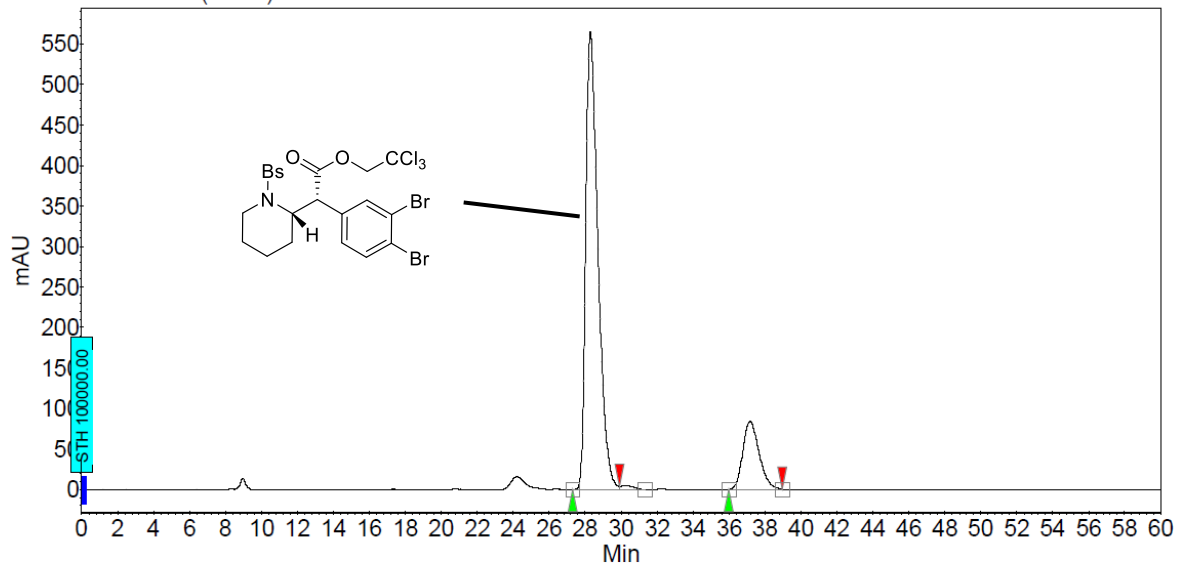

**Peak results :**

| Index | Name    | Time [Min] | Quantity [% Area] | Height [mAU] | Area [mAU.Min] | Area % [%] |
|-------|---------|------------|-------------------|--------------|----------------|------------|
| 1     | UNKNOWN | 28.28      | 83.59             | 564.9        | 446.8          | 83.588     |
| 2     | UNKNOWN | 37.17      | 16.41             | 83.9         | 87.7           | 16.412     |
| Total |         |            | 100.00            | 648.9        | 534.5          | 100.000    |

→ 67% ee

## 10.2. Cyclopropanation and C3 Functionalization Products

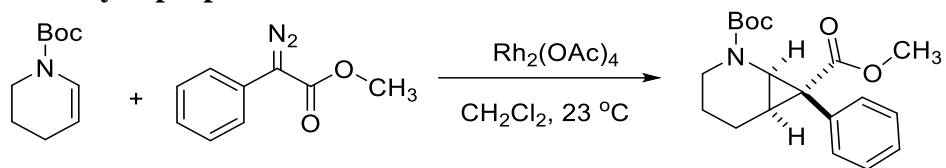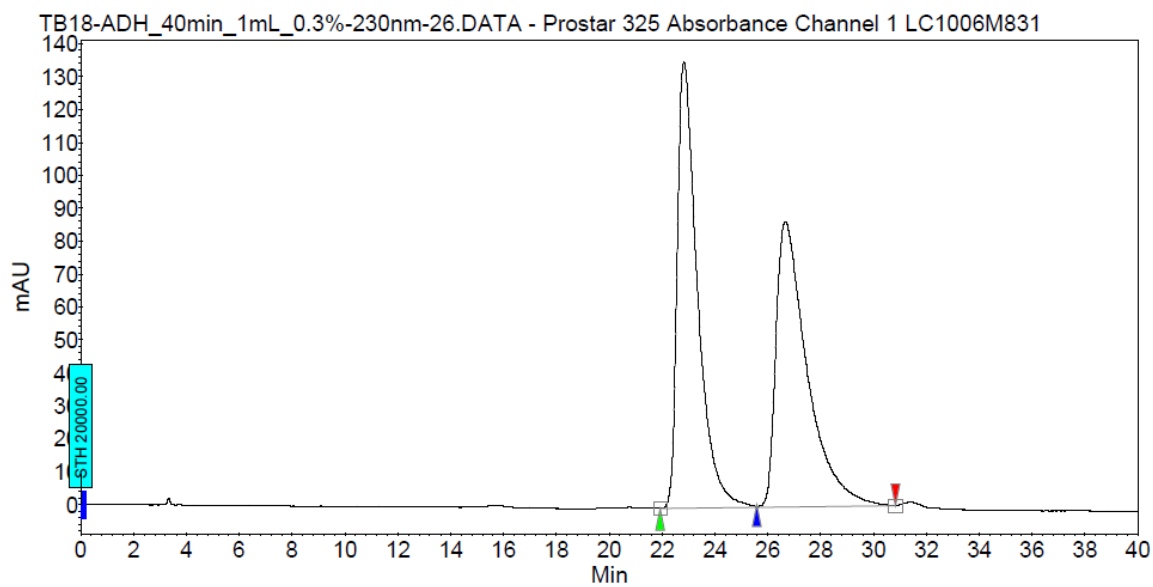

### Peak results :

| Index | Name    | Time [Min] | Quantity [% Area] | Height [mAU] | Area [mAU.Min] | Area % [%] |
|-------|---------|------------|-------------------|--------------|----------------|------------|
| 1     | UNKNOWN | 22.82      | 50.34             | 135.4        | 119.9          | 50.343     |
| 2     | UNKNOWN | 26.66      | 49.66             | 86.7         | 118.3          | 49.657     |
|       |         |            |                   |              |                |            |
| Total |         |            | 100.00            | 222.0        | 238.2          | 100.000    |

Racemic standard







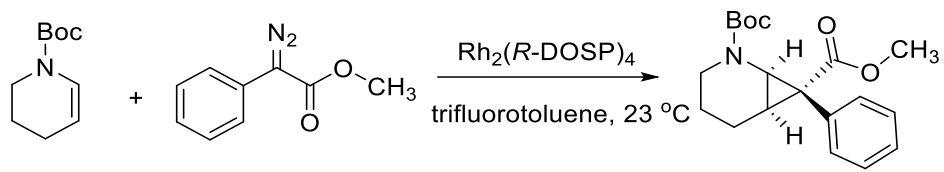

(Table S3, entry 4)

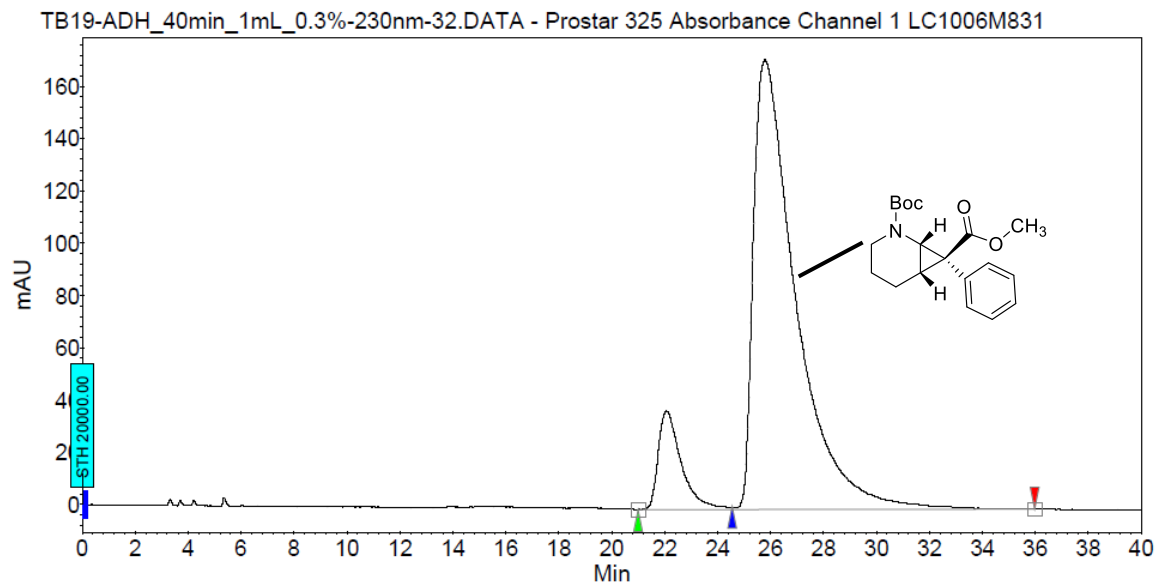

**Peak results :**

| Index | Name    | Time [Min] | Quantity [% Area] | Height [mAU] | Area [mAU.Min] | Area % [%] |
|-------|---------|------------|-------------------|--------------|----------------|------------|
| 1     | UNKNOWN | 22.06      | 10.62             | 37.8         | 38.0           | 10.615     |
| 2     | UNKNOWN | 25.78      | 89.38             | 172.1        | 319.7          | 89.385     |
| Total |         |            | 100.00            | 209.9        | 357.6          | 100.000    |

→ -79% ee

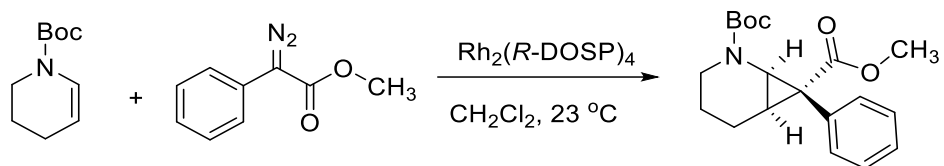

(Table S3, entry 5)

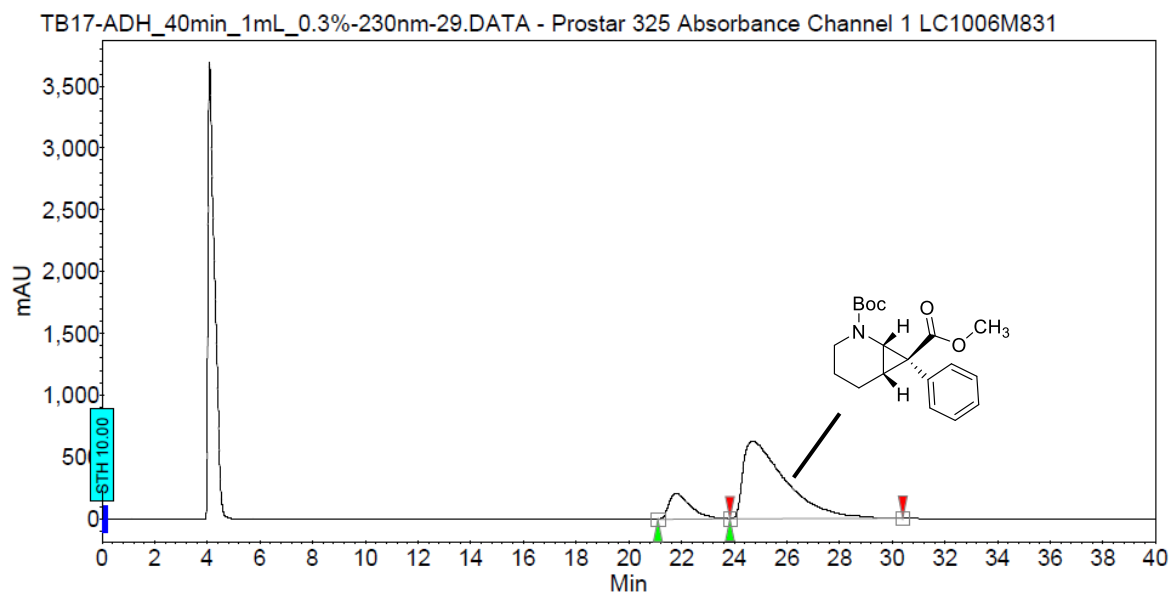

**Peak results :**

| Index | Name    | Time [Min] | Quantity [% Area] | Height [mAU] | Area [mAU.Min] | Area % [%] |
|-------|---------|------------|-------------------|--------------|----------------|------------|
| 1     | UNKNOWN | 21.79      | 14.28             | 206.8        | 194.5          | 14.283     |
| 2     | UNKNOWN | 24.70      | 85.72             | 625.6        | 1167.4         | 85.717     |
| Total |         |            | 100.00            | 832.5        | 1362.0         | 100.000    |

→ -71% ee



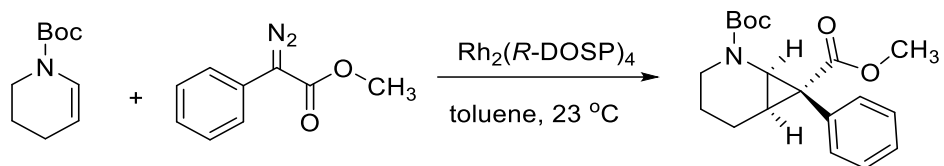

(Table S3, entry 6)

US84-ADH\_45min\_1.0mL\_0.3%\_210\_230nm.METH7.DATA - Prostar 325 Absorbance Channel 1 LC1006M831

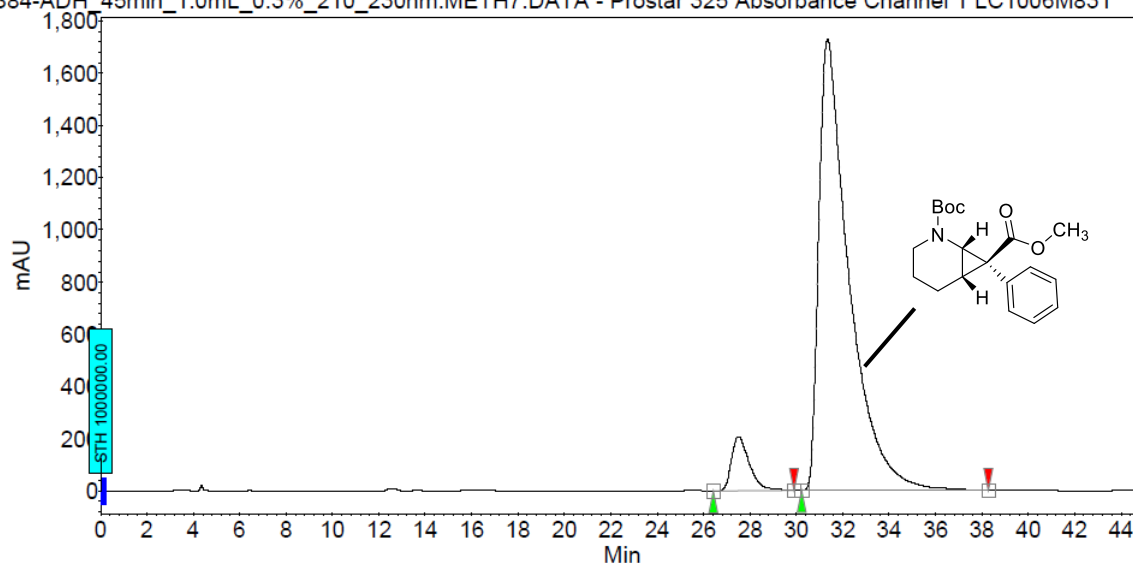

**Peak results :**

| Index | Name    | Time [Min] | Quantity [% Area] | Height [mAU] | Area [mAU.Min] | Area % [%] |
|-------|---------|------------|-------------------|--------------|----------------|------------|
| 1     | UNKNOWN | 27.50      | 6.62              | 207.3        | 185.0          | 6.619      |
| 2     | UNKNOWN | 31.35      | 93.38             | 1726.9       | 2609.5         | 93.381     |
| Total |         |            | 100.00            | 1934.2       | 2794.5         | 100.000    |

→ -87% ee

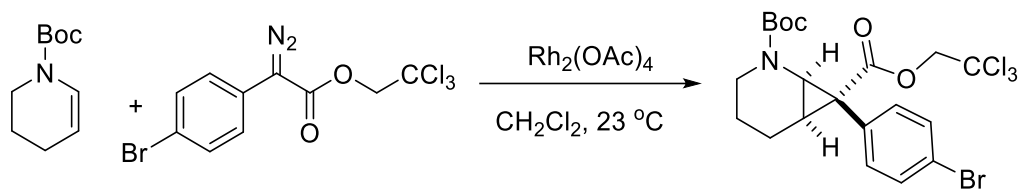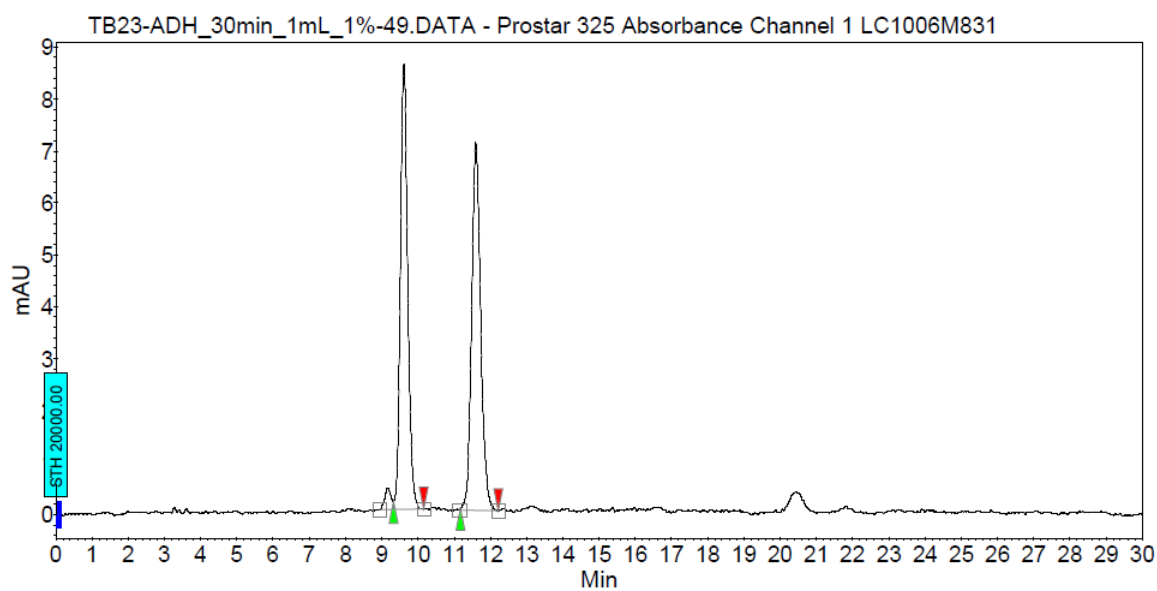

**Peak results :**

| Index | Name    | Time [Min] | Quantity [% Area] | Height [mAU] | Area [mAU.Min] | Area % [%] |
|-------|---------|------------|-------------------|--------------|----------------|------------|
| 1     | UNKNOWN | 9.61       | 49.41             | 8.6          | 2.0            | 49.414     |
| 2     | UNKNOWN | 11.59      | 50.59             | 7.1          | 2.1            | 50.586     |
| Total |         |            | 100.00            | 15.6         | 4.1            | 100.000    |

Racemic standard

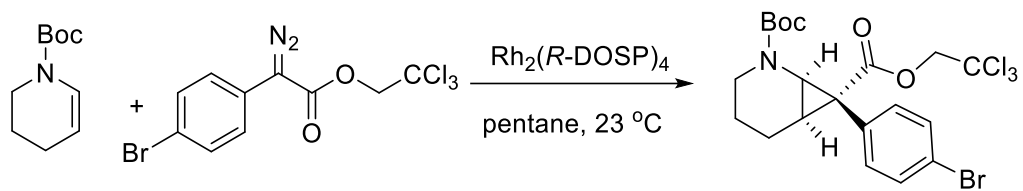

(Table S3, entry 7)

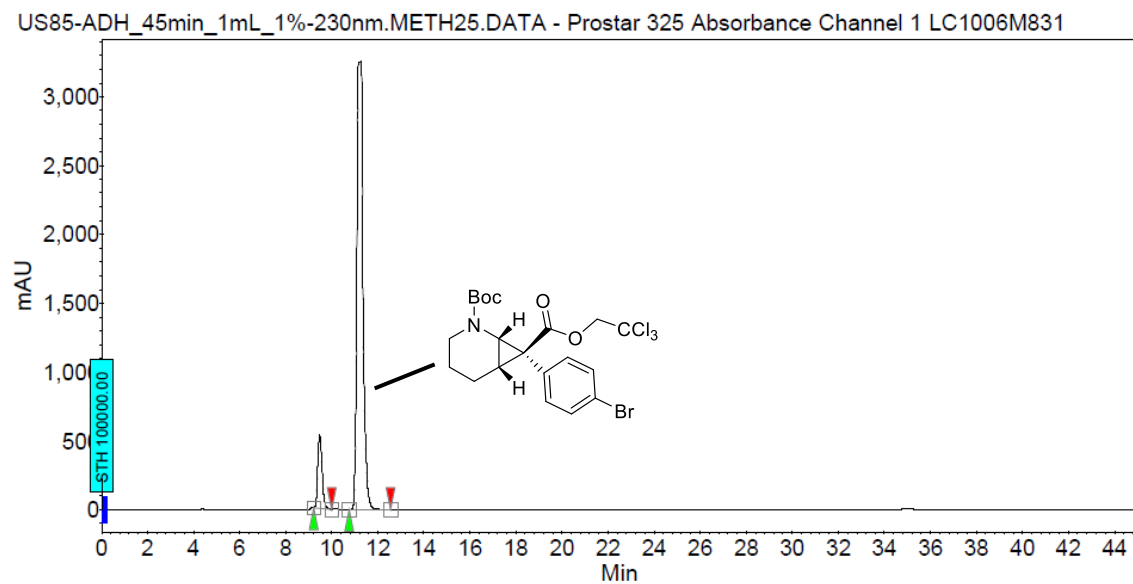

Peak results :

| Index | Name    | Time [Min] | Quantity [% Area] | Height [mAU] | Area [mAU.Min] | Area % [%] |
|-------|---------|------------|-------------------|--------------|----------------|------------|
| 1     | UNKNOWN | 9.47       | 10.19             | 531.6        | 114.7          | 10.190     |
| 2     | UNKNOWN | 11.27      | 89.81             | 3256.4       | 1011.2         | 89.810     |
| Total |         |            | 100.00            | 3788.0       | 1125.9         | 100.000    |

→ -80% ee

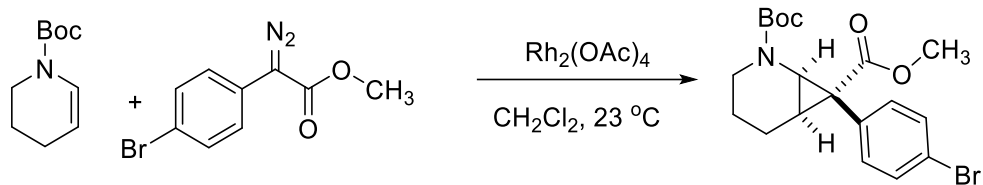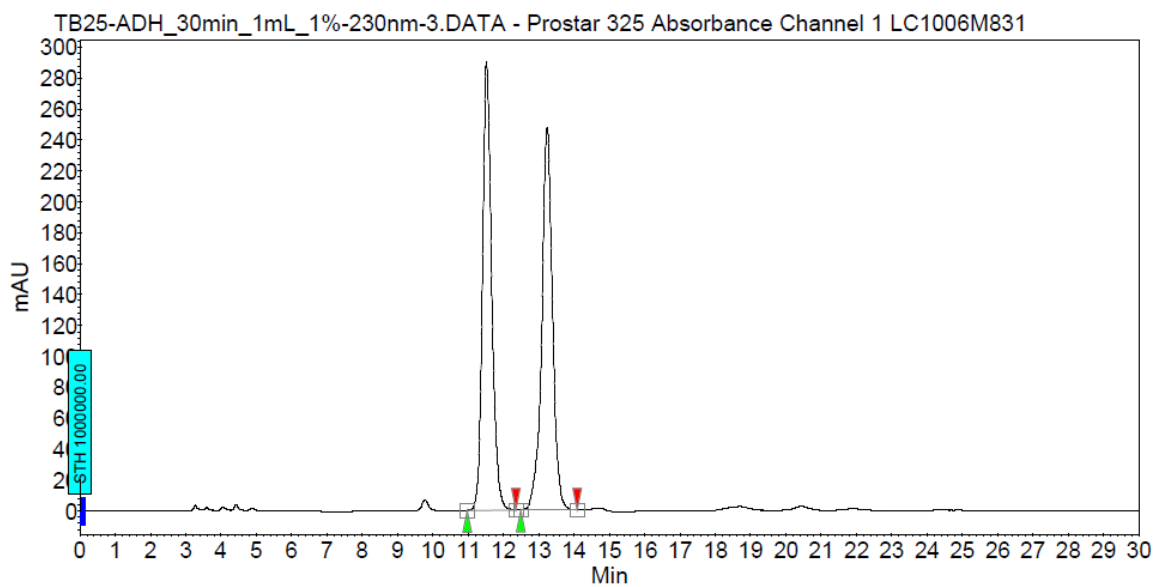

**Peak results :**

| Index | Name    | Time [Min] | Quantity [% Area] | Height [mAU] | Area [mAU.Min] | Area % [%] |
|-------|---------|------------|-------------------|--------------|----------------|------------|
| 1     | UNKNOWN | 11.52      | 50.00             | 289.7        | 87.5           | 50.001     |
| 2     | UNKNOWN | 13.23      | 50.00             | 247.5        | 87.5           | 49.999     |
| Total |         |            | 100.00            | 537.2        | 175.0          | 100.000    |

Racemic standard

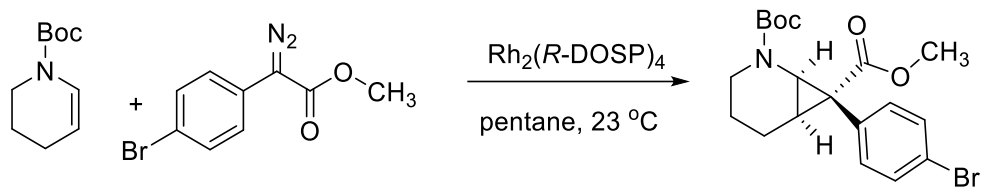

(Table 2, entry 4) (Table S3, entry 8)

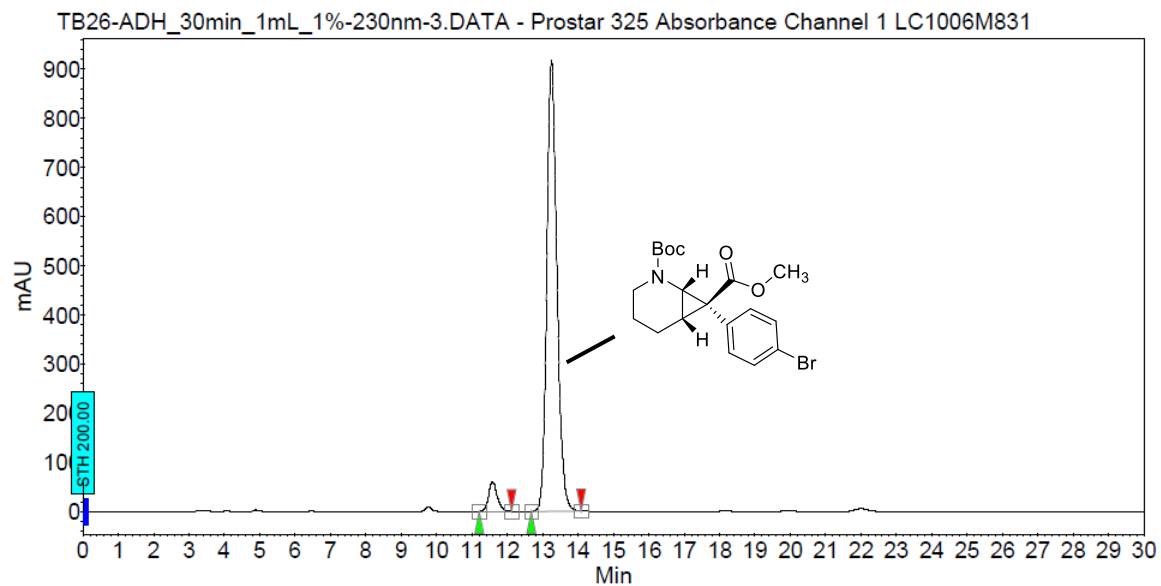

**Peak results :**

| Index | Name    | Time [Min] | Quantity [% Area] | Height [mAU] | Area [mAU.Min] | Area % [%] |
|-------|---------|------------|-------------------|--------------|----------------|------------|
| 1     | UNKNOWN | 11.58      | 5.30              | 59.9         | 17.0           | 5.305      |
| 2     | UNKNOWN | 13.24      | 94.70             | 916.1        | 303.9          | 94.695     |
| Total |         |            | 100.00            | 975.9        | 320.9          | 100.000    |

→ -89% ee

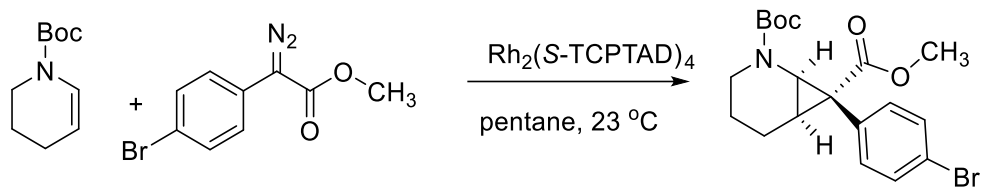

(Table 2, entry 1) (Table S3, entry 9)

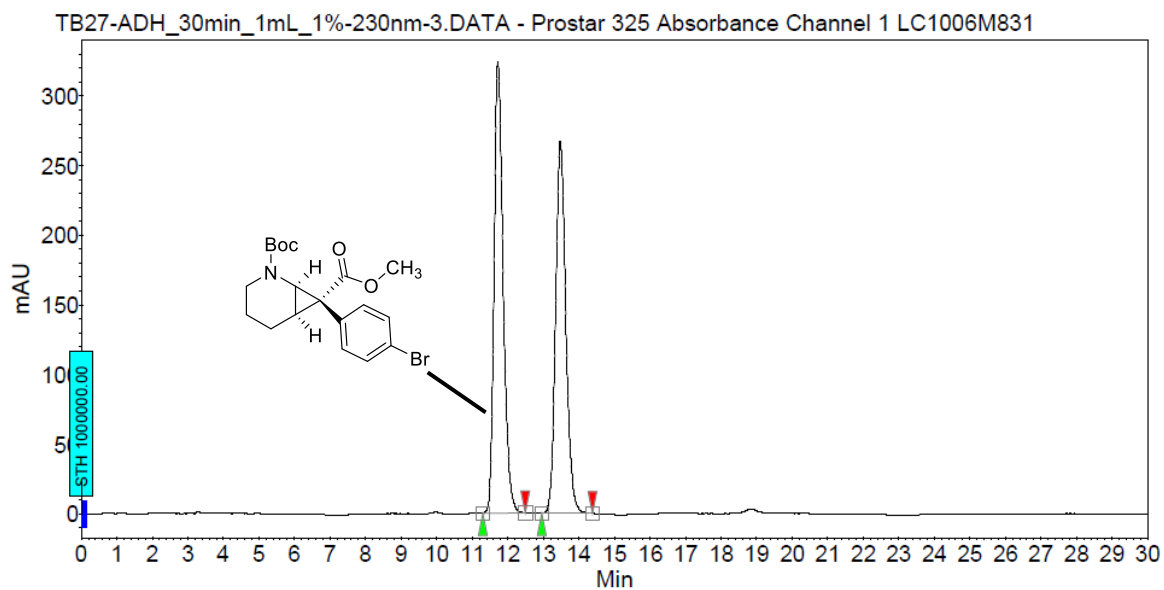

**Peak results :**

| Index | Name    | Time [Min] | Quantity [% Area] | Height [mAU] | Area [mAU.Min] | Area % [%] |
|-------|---------|------------|-------------------|--------------|----------------|------------|
| 1     | UNKNOWN | 11.72      | 51.70             | 323.6        | 95.5           | 51.697     |
| 2     | UNKNOWN | 13.48      | 48.30             | 267.0        | 89.2           | 48.303     |
| Total |         |            | 100.00            | 590.6        | 184.7          | 100.000    |

→ 3% ee

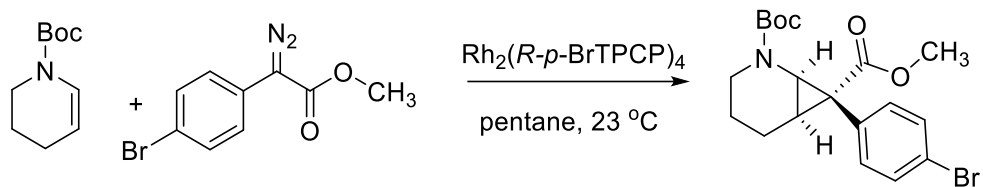

(Table 2, entry 2) (Table S3, entry 10)

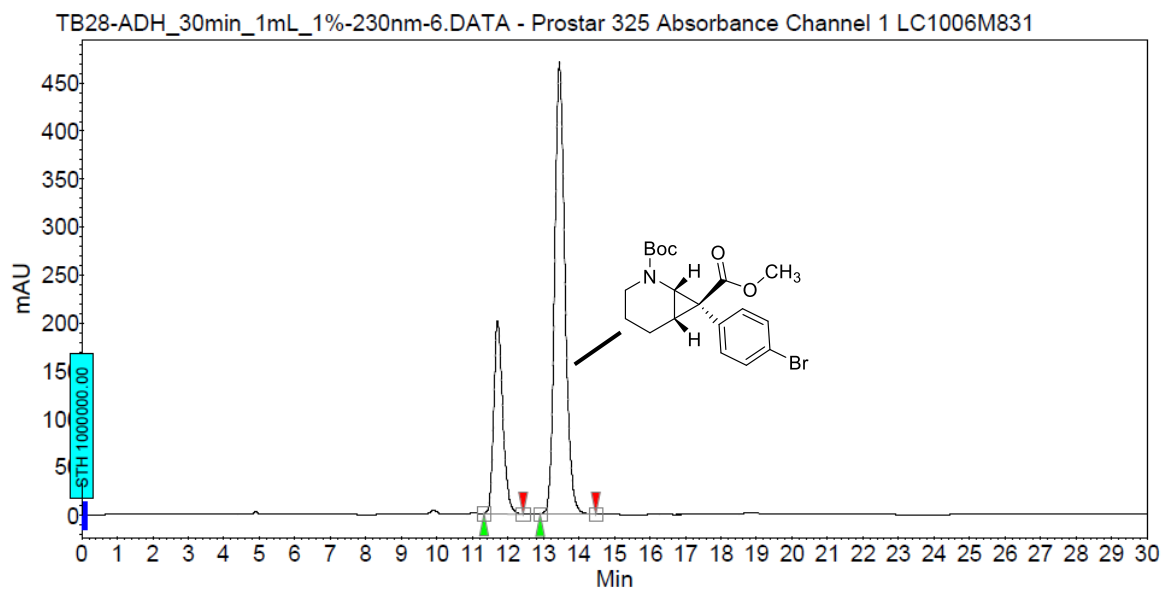

**Peak results :**

| Index | Name    | Time [Min] | Quantity [% Area] | Height [mAU] | Area [mAU.Min] | Area % [%] |
|-------|---------|------------|-------------------|--------------|----------------|------------|
| 1     | UNKNOWN | 11.71      | 27.21             | 200.5        | 59.4           | 27.208     |
| 2     | UNKNOWN | 13.45      | 72.79             | 470.4        | 158.9          | 72.792     |
| Total |         |            | 100.00            | 670.9        | 218.2          | 100.000    |

→ -46% ee

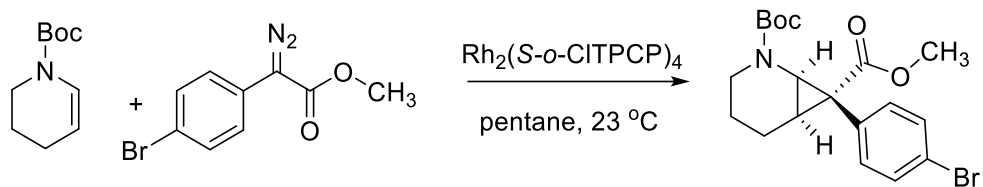

(Table S3, entry 11)

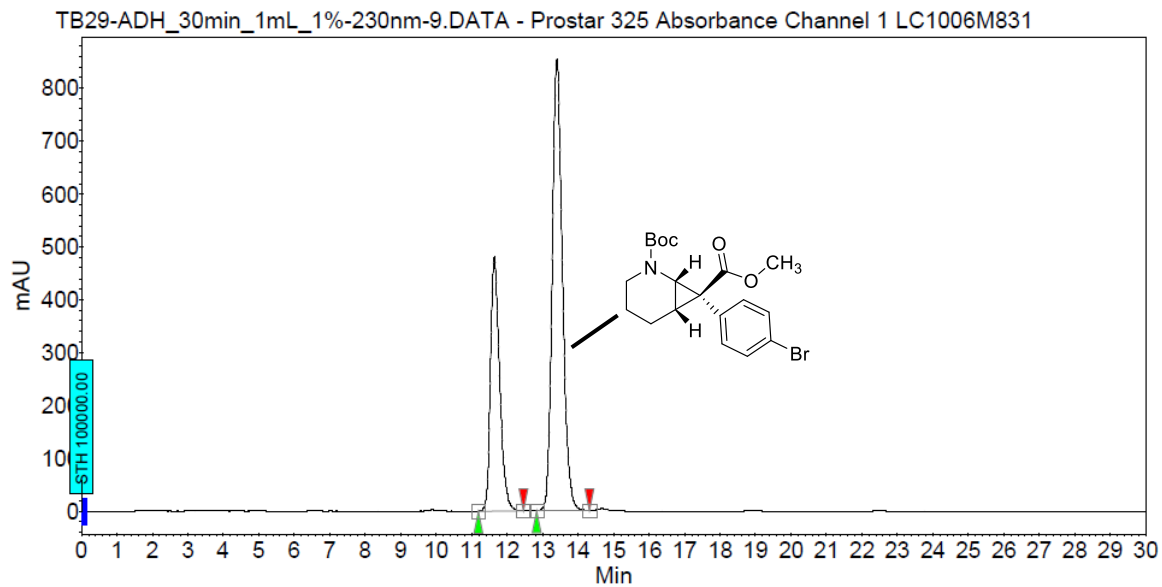

**Peak results :**

| Index | Name    | Time [Min] | Quantity [% Area] | Height [mAU] | Area [mAU.Min] | Area % [%] |
|-------|---------|------------|-------------------|--------------|----------------|------------|
| 1     | UNKNOWN | 11.64      | 33.41             | 480.4        | 143.7          | 33.413     |
| 2     | UNKNOWN | 13.40      | 66.59             | 852.6        | 286.4          | 66.587     |
| Total |         |            | 100.00            | 1332.9       | 430.1          | 100.000    |

→ -33% ee



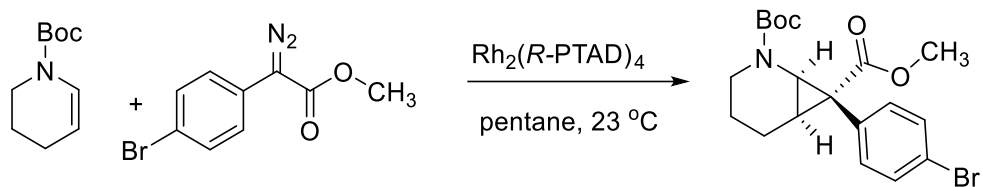

(Table S3, entry 12)

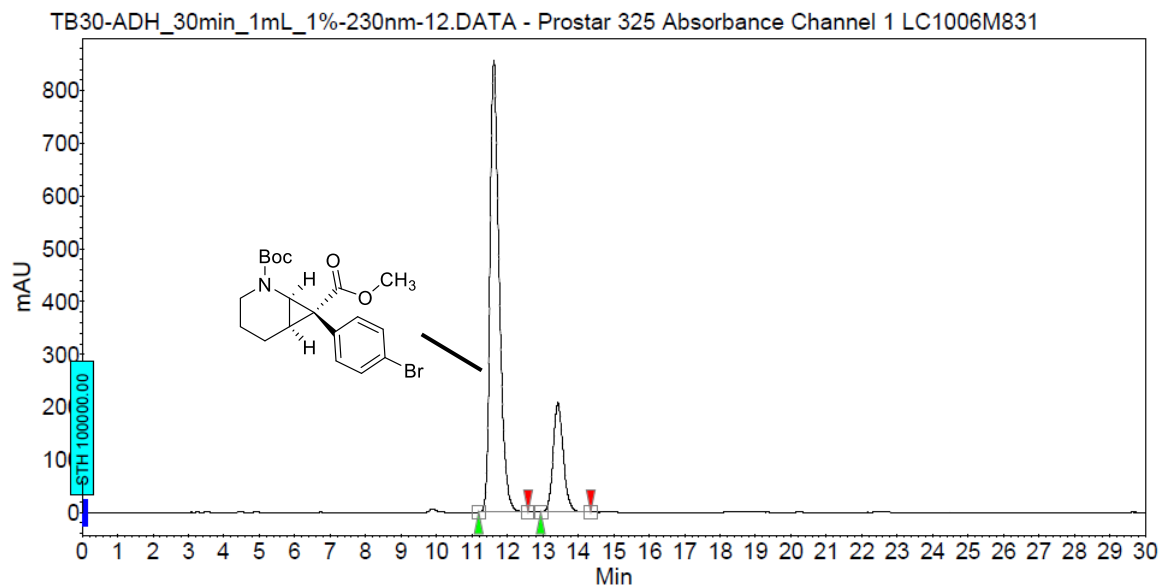

**Peak results :**

| Index | Name    | Time [Min] | Quantity [% Area] | Height [mAU] | Area [mAU.Min] | Area % [%] |
|-------|---------|------------|-------------------|--------------|----------------|------------|
| 1     | UNKNOWN | 11.61      | 78.91             | 856.0        | 258.2          | 78.915     |
| 2     | UNKNOWN | 13.42      | 21.09             | 207.2        | 69.0           | 21.085     |
| Total |         |            | 100.00            | 1063.2       | 327.2          | 100.000    |

→ 58% ee

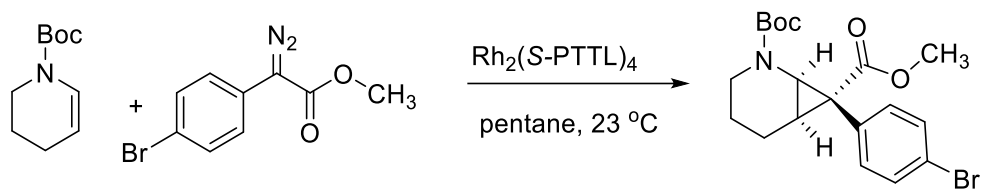

(Table S3, entry 13)

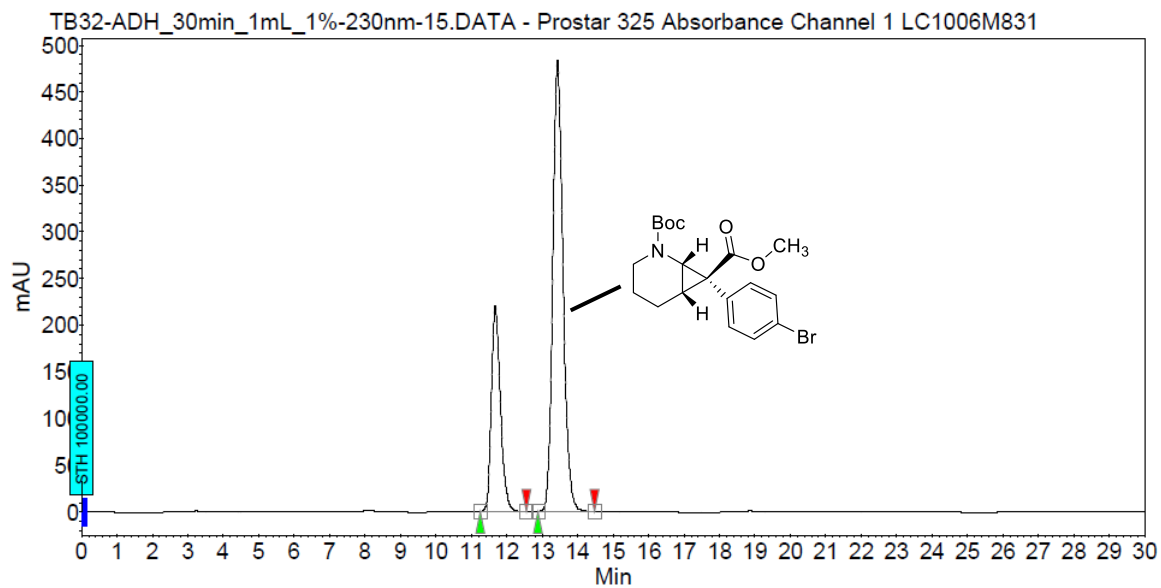

Peak results :

| Index | Name    | Time [Min] | Quantity [% Area] | Height [mAU] | Area [mAU.Min] | Area % [%] |
|-------|---------|------------|-------------------|--------------|----------------|------------|
| 1     | UNKNOWN | 11.67      | 28.69             | 220.6        | 65.5           | 28.691     |
| 2     | UNKNOWN | 13.43      | 71.31             | 483.0        | 162.7          | 71.309     |
| Total |         |            | 100.00            | 703.6        | 228.1          | 100.000    |

→ -43% ee

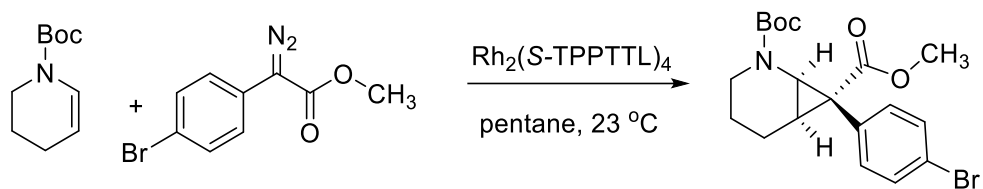

(Table S3, entry 14)

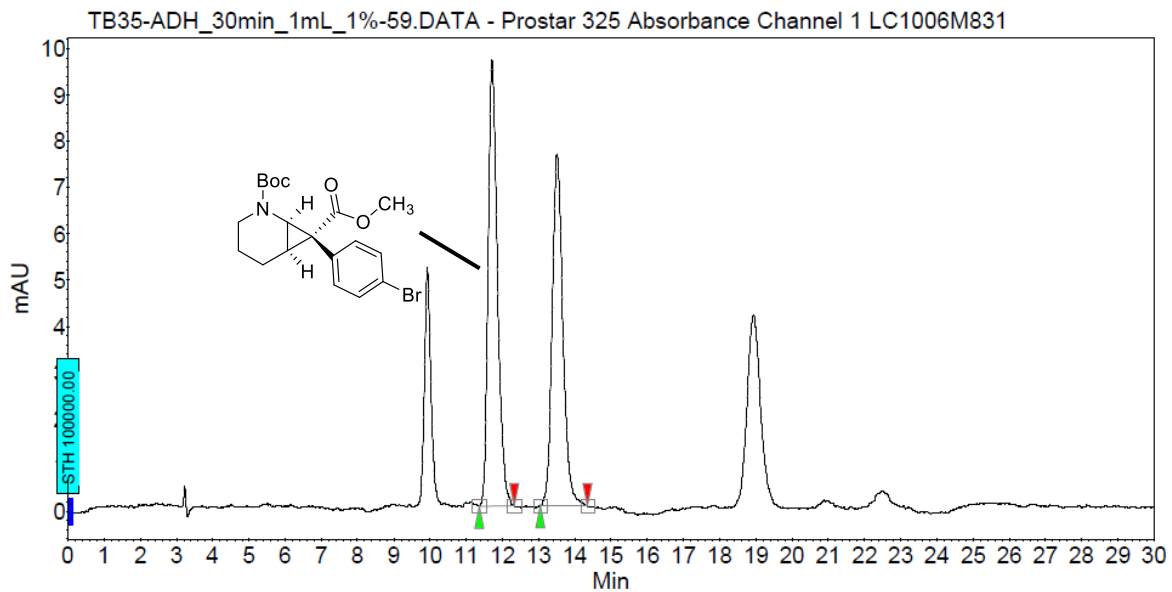

**Peak results :**

| Index | Name    | Time [Min] | Quantity [% Area] | Height [mAU] | Area [mAU.Min] | Area % [%] |
|-------|---------|------------|-------------------|--------------|----------------|------------|
| 1     | UNKNOWN | 11.71      | 52.40             | 9.6          | 2.9            | 52.401     |
| 2     | UNKNOWN | 13.51      | 47.60             | 7.6          | 2.6            | 47.599     |
| Total |         |            | 100.00            | 17.2         | 5.5            | 100.000    |

→ 5% ee

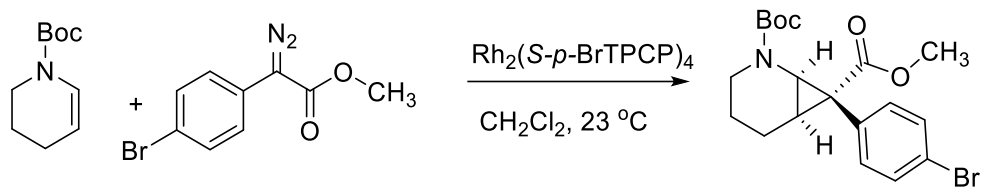

(Table S3, entry 15)

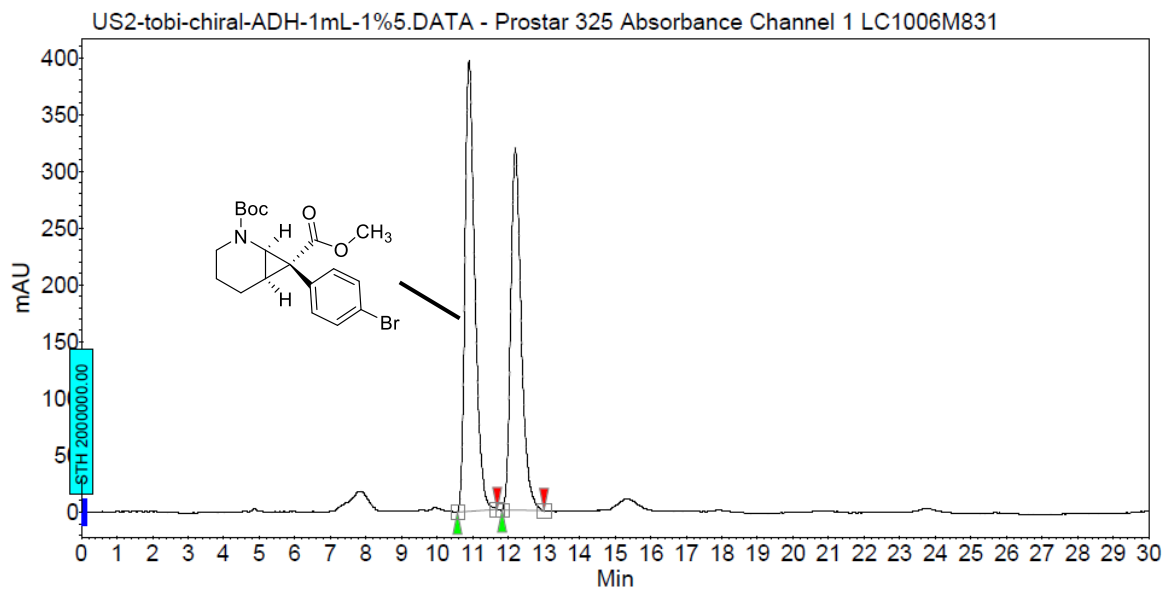

→ 8% ee

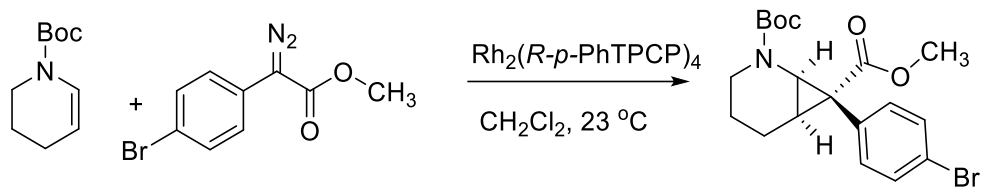

(Table S3, entry 16)

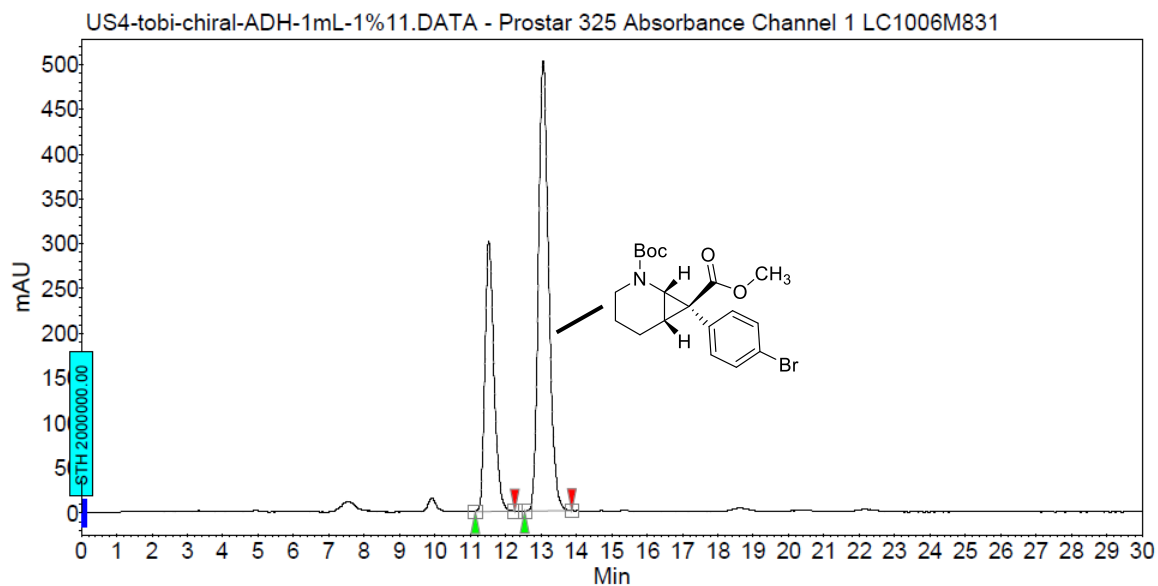

**Peak results :**

| Index | Name    | Time [Min] | Quantity [% Area] | Height [mAU] | Area [mAU.Min] | Area % [%] |
|-------|---------|------------|-------------------|--------------|----------------|------------|
| 1     | UNKNOWN | 11.52      | 34.78             | 301.8        | 89.8           | 34.782     |
| 2     | UNKNOWN | 13.06      | 65.22             | 501.4        | 168.4          | 65.218     |
| Total |         |            | 100.00            | 803.2        | 258.2          | 100.000    |

→ -30% ee

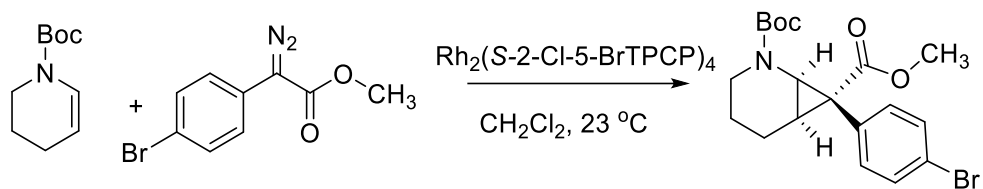

(Table 2, entry 3) (Table S3, entry 17)

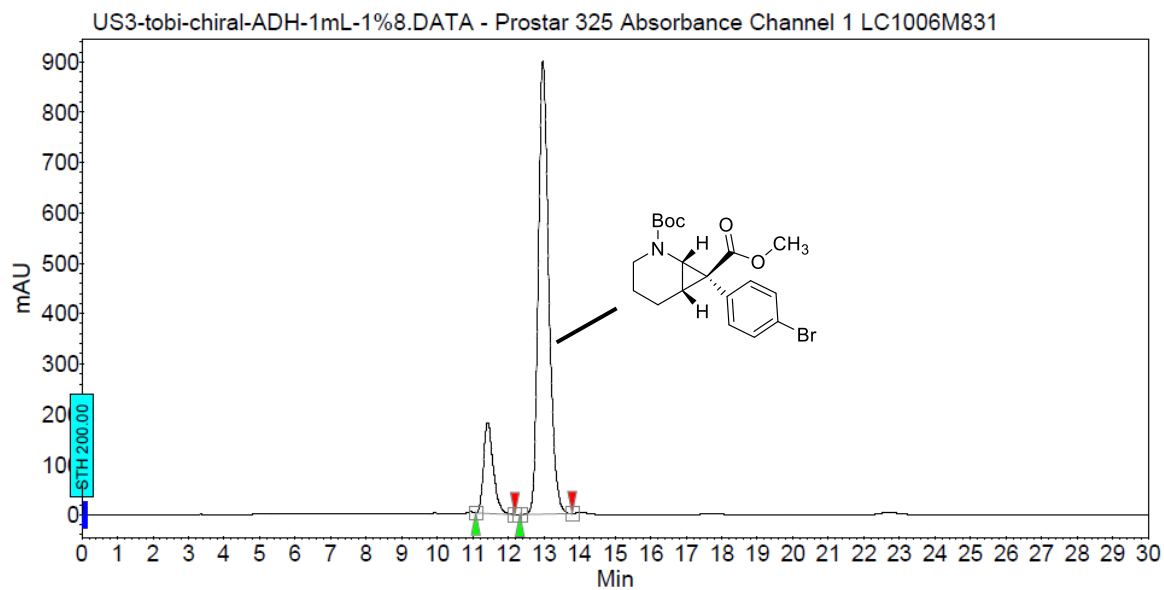

**Peak results :**

| Index | Name    | Time [Min] | Quantity [% Area] | Height [mAU] | Area [mAU.Min] | Area % [%] |
|-------|---------|------------|-------------------|--------------|----------------|------------|
| 1     | UNKNOWN | 11.42      | 15.57             | 180.9        | 56.8           | 15.571     |
| 2     | UNKNOWN | 12.97      | 84.43             | 899.6        | 308.2          | 84.429     |
| Total |         |            | 100.00            | 1080.5       | 365.0          | 100.000    |

→ -69% ee

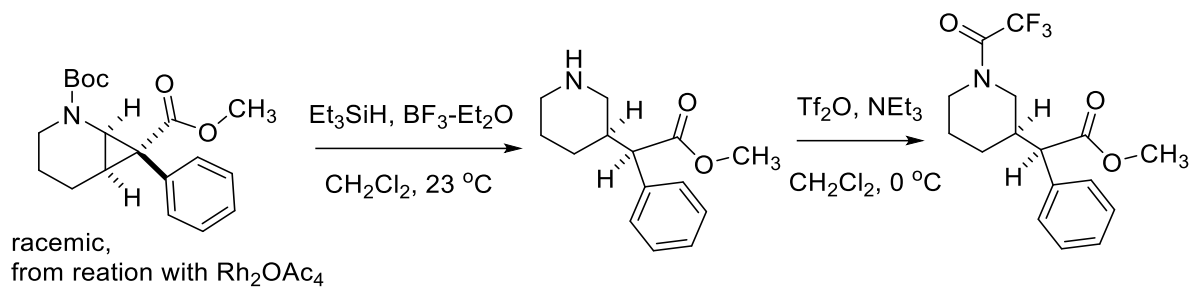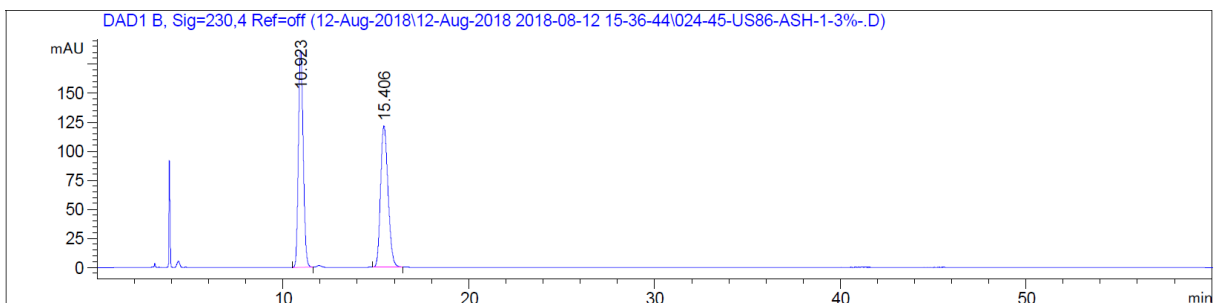

Signal 2: DAD1 B, Sig=230,4 Ref=off

| Peak # | RetTime [min] | Type | Width [min] | Area [mAU*s] | Height [mAU] | Area %  |
|--------|---------------|------|-------------|--------------|--------------|---------|
| 1      | 10.923        | BB   | 0.2818      | 3382.68433   | 186.81001    | 49.9569 |
| 2      | 15.406        | BB   | 0.4115      | 3388.52686   | 121.63947    | 50.0431 |

Totals : 6771.21118 308.44948

Racemic standard

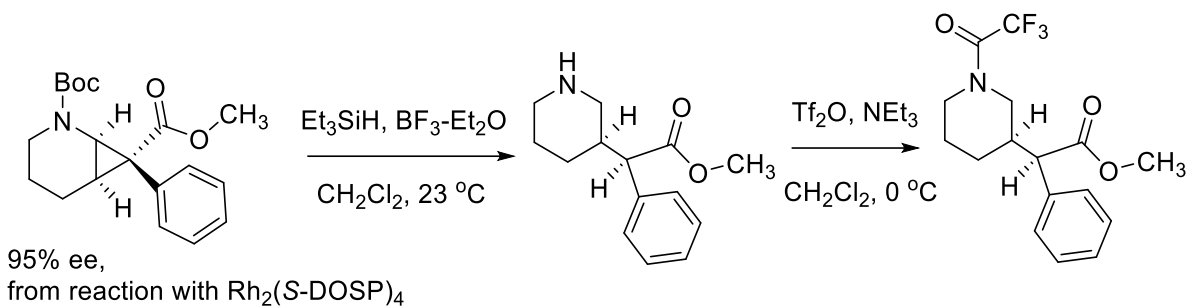

(Table 2, **9b**)

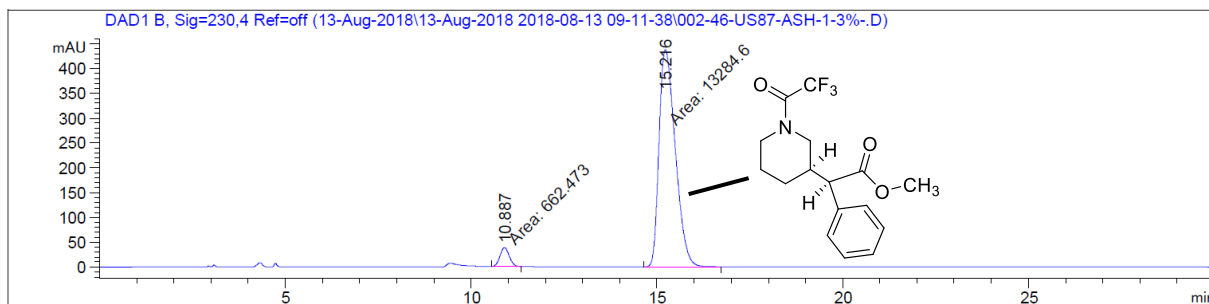

Signal 2: DAD1 B, Sig=230,4 Ref=off

| Peak # | RetTime [min] | Type | Width [min] | Area [mAU*s] | Height [mAU] | Area %  |
|--------|---------------|------|-------------|--------------|--------------|---------|
| 1      | 10.887        | MM   | 0.2891      | 662.47327    | 38.18865     | 4.7499  |
| 2      | 15.216        | MM   | 0.5055      | 1.32846e4    | 437.96808    | 95.2501 |

Totals : 1.39470e4 476.15673

→ 91% ee



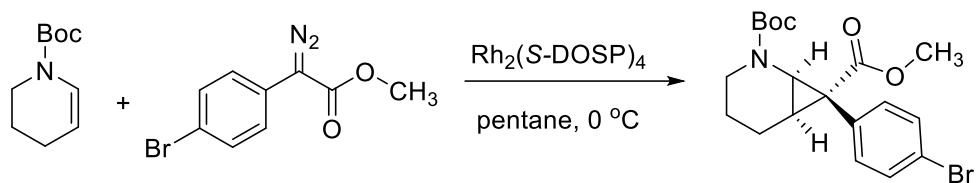

(Table 2, **8a**)

US18-chiral-ADH\_60min\_1mL\_1%-230nm.METH5.DATA - Prostar 325 Absorbance Channel 1 LC1006M831

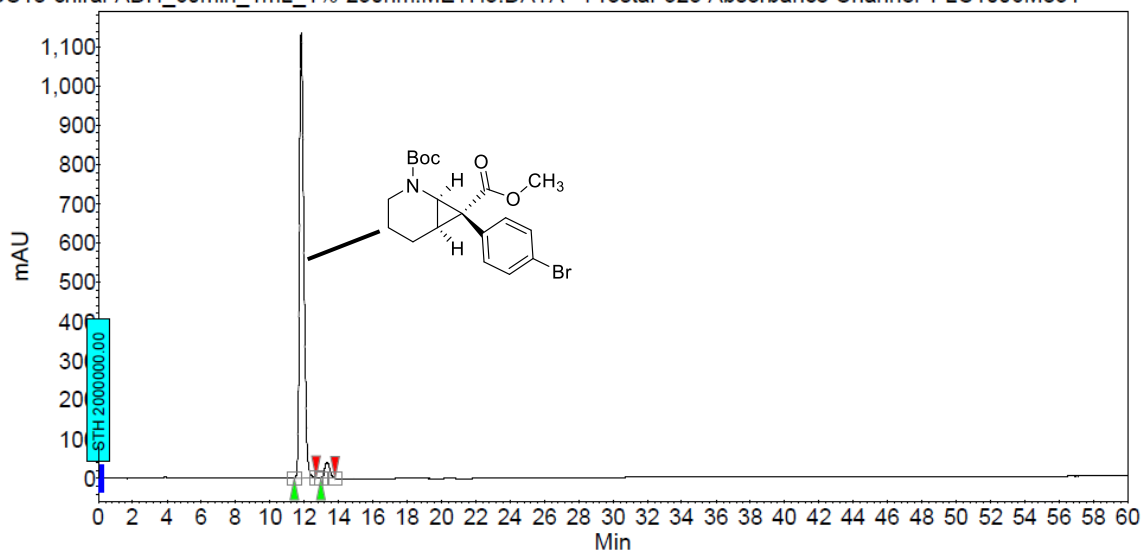

Peak results :

| Index | Name    | Time [Min] | Quantity [% Area] | Height [mAU] | Area [mAU.Min] | Area % [%] |
|-------|---------|------------|-------------------|--------------|----------------|------------|
| 1     | UNKNOWN | 11.83      | 96.05             | 1134.2       | 328.5          | 96.051     |
| 2     | UNKNOWN | 13.33      | 3.95              | 40.9         | 13.5           | 3.949      |
| Total |         |            | 100.00            | 1175.2       | 342.0          | 100.000    |

→ 92% ee

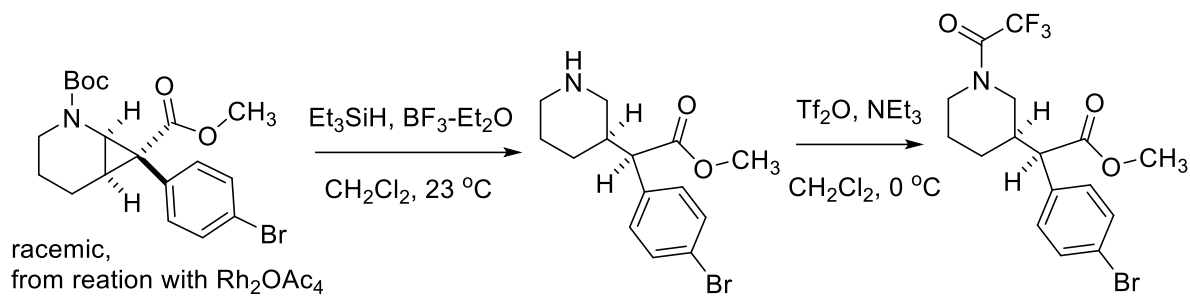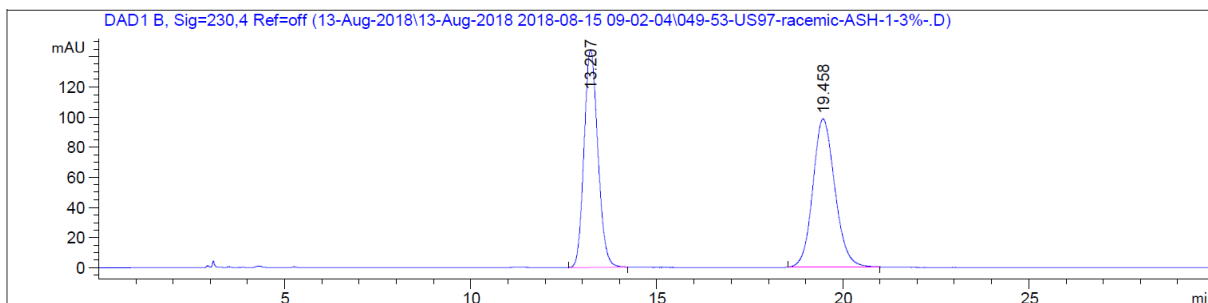

Signal 2: DAD1 B, Sig=230,4 Ref=off

| Peak # | RetTime [min] | Type | Width [min] | Area [mAU*s] | Height [mAU] | Area %  |
|--------|---------------|------|-------------|--------------|--------------|---------|
| 1      | 13.207        | BB   | 0.3819      | 3718.29077   | 144.41826    | 47.8783 |
| 2      | 19.458        | BB   | 0.5071      | 4047.83301   | 98.36426     | 52.1217 |

Totals : 7766.12378 242.78252

## Racemic Standard

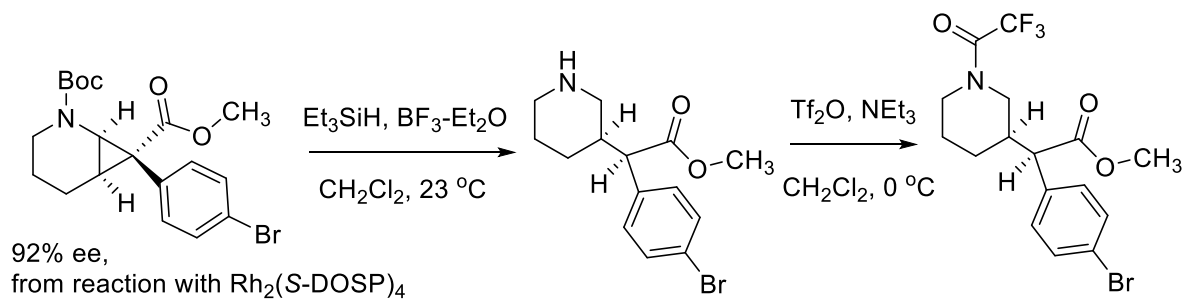

(Table 2, **9a**)

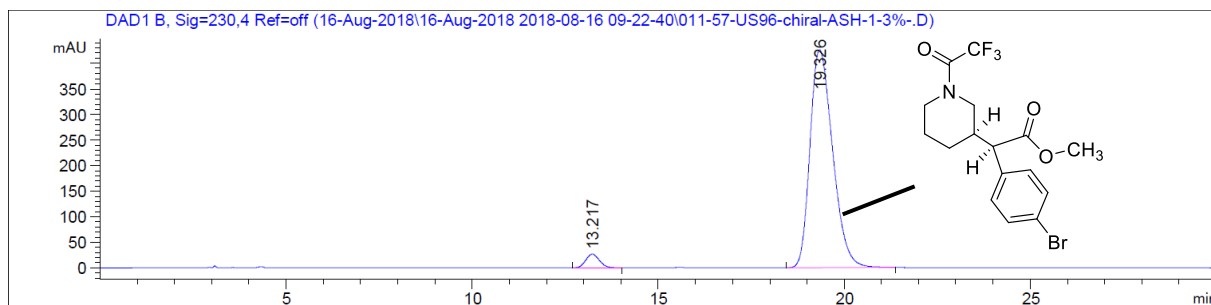

Signal 2: DAD1 B, Sig=230,4 Ref=off

| Peak # | RetTime [min] | Type | Width [min] | Area [mAU*s] | Height [mAU] | Area %  |
|--------|---------------|------|-------------|--------------|--------------|---------|
| 1      | 13.217        | BB   | 0.3150      | 683.13470    | 26.83323     | 3.6499  |
| 2      | 19.326        | BB   | 0.6036      | 1.80335e4    | 426.23746    | 96.3501 |

Totals : 1.87166e4 453.07069

→ 93% ee

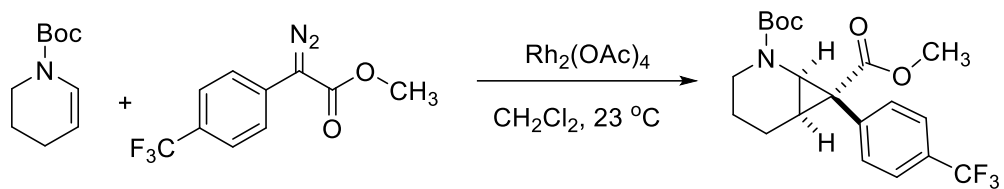

US15-racemic-ADH\_60min\_0.65mL\_0.65%\_230\_210NMnm.METH5.DATA - Prostar 325 Absorbance Channel 1 LC1006M831

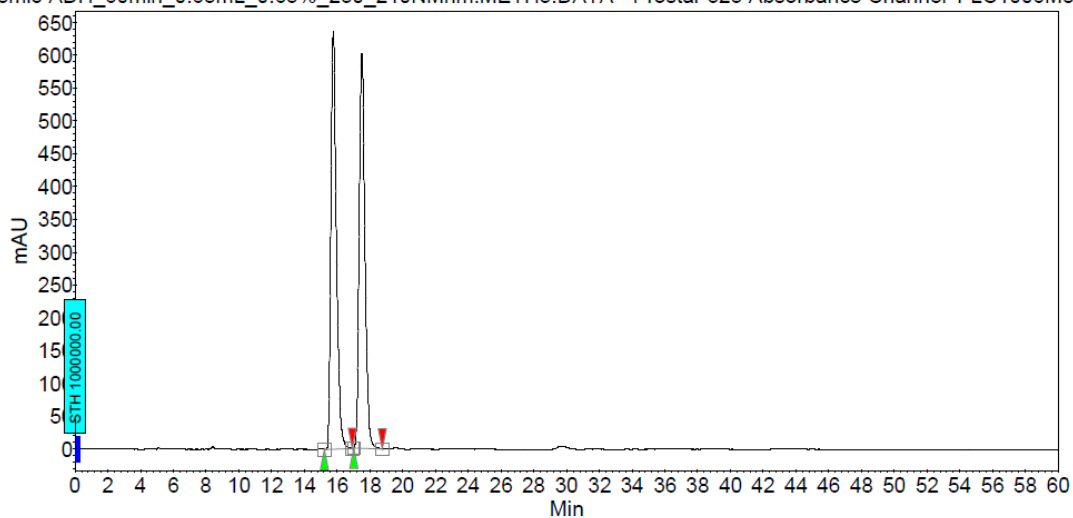

**Peak results :**

| Index | Name    | Time [Min] | Quantity [% Area] | Height [mAU] | Area [mAU.Min] | Area % [%] |
|-------|---------|------------|-------------------|--------------|----------------|------------|
| 1     | UNKNOWN | 15.75      | 50.19             | 635.7        | 246.4          | 50.190     |
| 2     | UNKNOWN | 17.50      | 49.81             | 602.1        | 244.5          | 49.810     |
| Total |         |            | 100.00            | 1237.8       | 490.9          | 100.000    |

Racemic standard

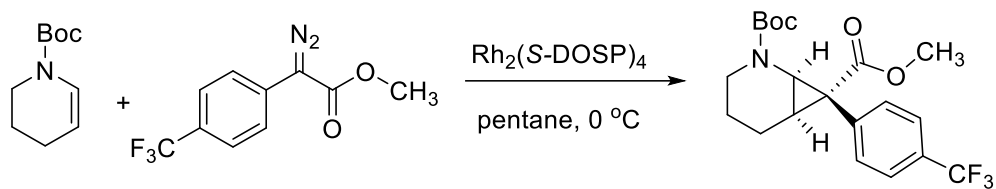

(Table 2, **8c**)

-chiral-ADH\_60min\_0.65mL\_0.65%\_230\_210NMnm.METH9.DATA - Prostar 325 Absorbance Channel 1 LC1006M831

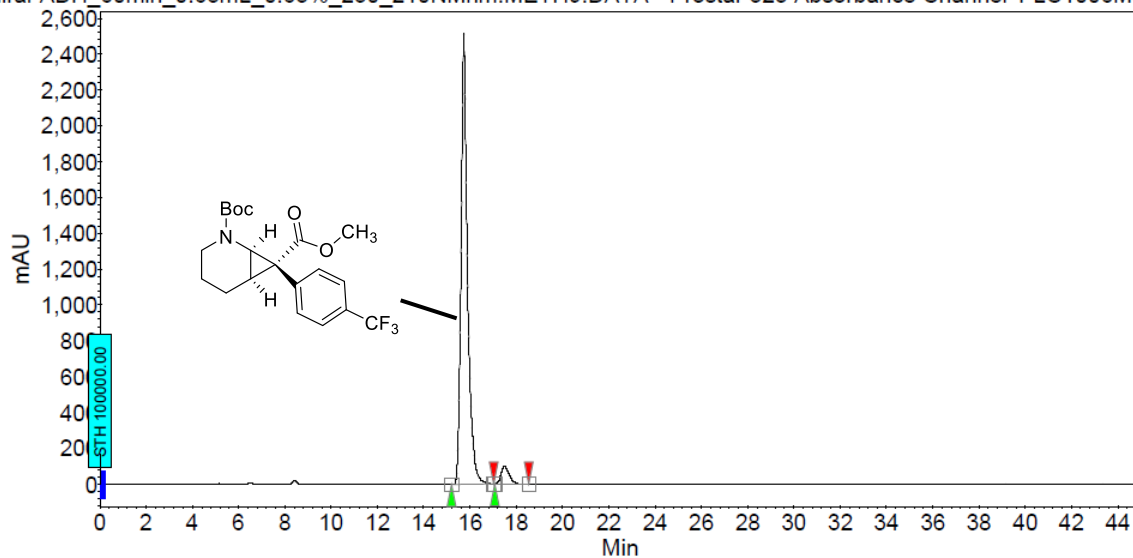

**Peak results :**

| Index | Name    | Time [Min] | Quantity [% Area] | Height [mAU] | Area [mAU.Min] | Area % [%] |
|-------|---------|------------|-------------------|--------------|----------------|------------|
| 1     | UNKNOWN | 15.73      | 95.12             | 2512.9       | 803.2          | 95.123     |
| 2     | UNKNOWN | 17.49      | 4.88              | 100.6        | 41.2           | 4.877      |
| Total |         |            | 100.00            | 2613.5       | 844.4          | 100.000    |

→ 90% ee



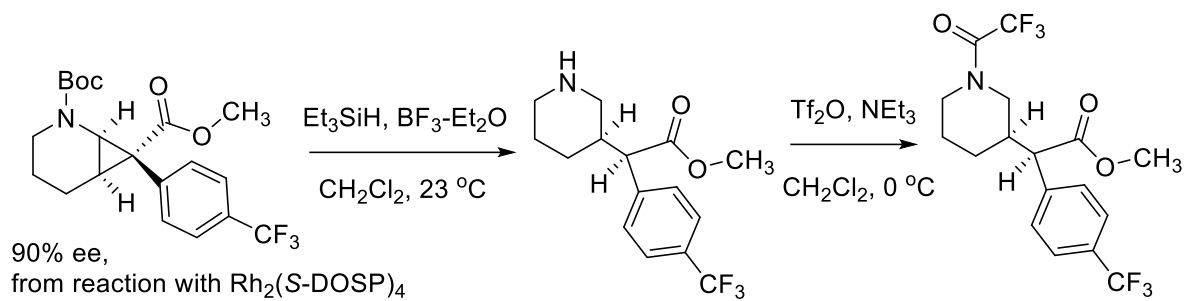

(Table 2, **9c**)

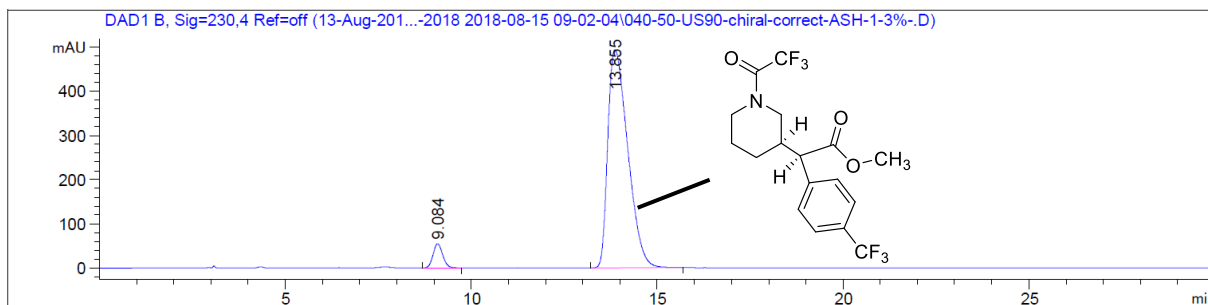

Signal 2: DAD1 B, Sig=230,4 Ref=off

| Peak # | RetTime [min] | Type | Width [min] | Area [mAU*s] | Height [mAU] | Area %  |
|--------|---------------|------|-------------|--------------|--------------|---------|
| 1      | 9.084         | BB   | 0.2710      | 983.66754    | 54.66121     | 5.0685  |
| 2      | 13.855        | BB   | 0.5476      | 1.84237e4    | 493.40344    | 94.9315 |

Totals : 1.94074e4 548.06465

→ 90% ee

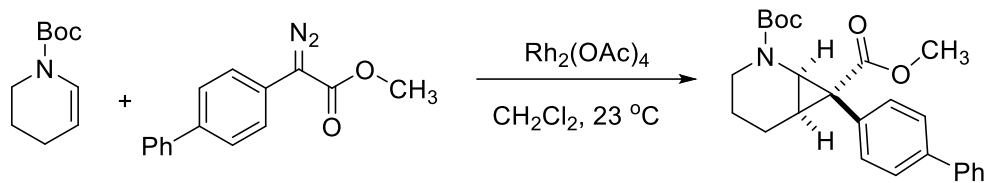

US-11-racemic-S4900-1-1%-230nm-60min-23.DATA - Prostar 325 Absorbance Channel 1 LC1006M831

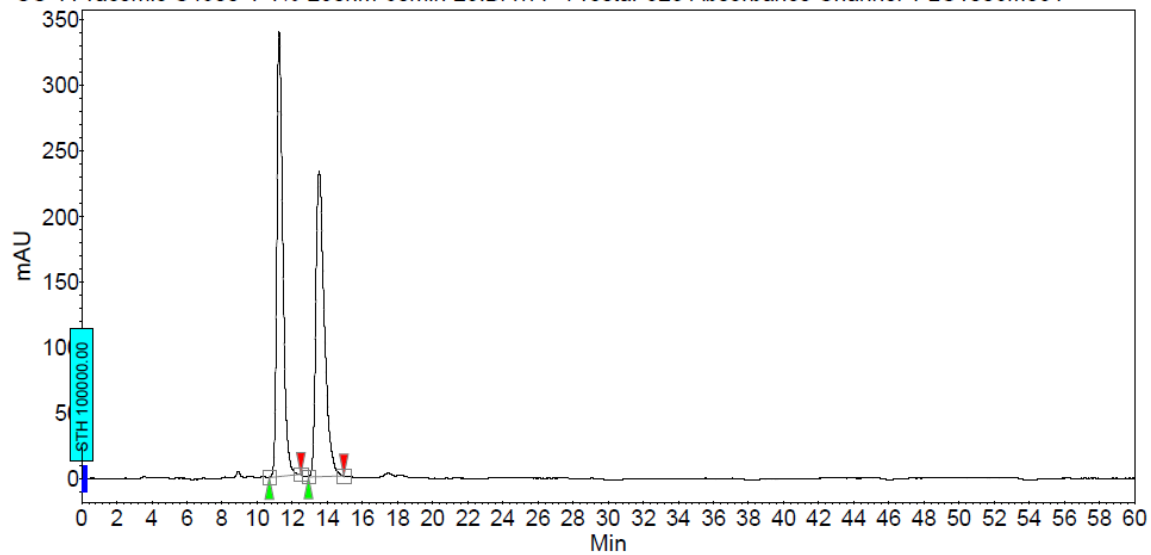

**Peak results :**

| Index | Name    | Time [Min] | Quantity [% Area] | Height [mAU] | Area [mAU.Min] | Area % [%] |
|-------|---------|------------|-------------------|--------------|----------------|------------|
| 1     | UNKNOWN | 11.26      | 50.46             | 339.0        | 134.2          | 50.460     |
| 2     | UNKNOWN | 13.53      | 49.54             | 232.7        | 131.8          | 49.540     |
| Total |         |            | 100.00            | 571.8        | 266.0          | 100.000    |

Racemic standard







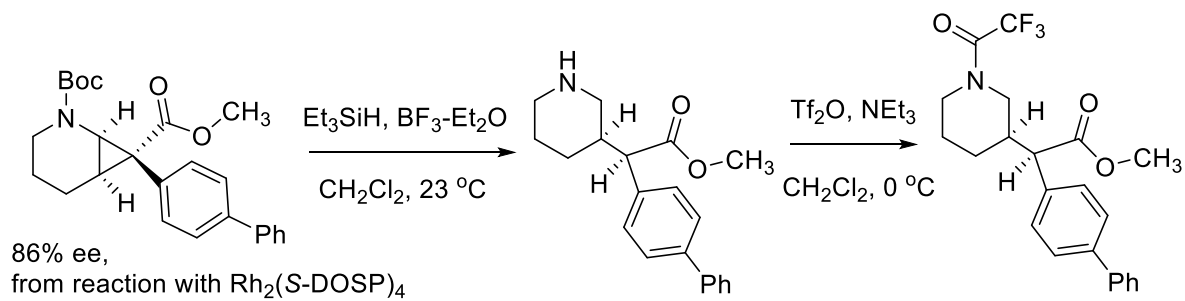

(Table 2, **9d**)

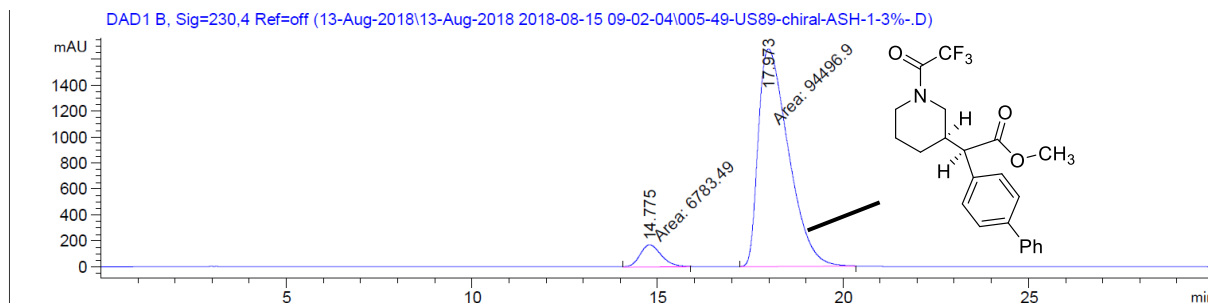

Signal 2: DAD1 B, Sig=230,4 Ref=off

| Peak # | RetTime [min] | Type | Width [min] | Area [mAU*s] | Height [mAU] | Area %  |
|--------|---------------|------|-------------|--------------|--------------|---------|
| 1      | 14.775        | MM   | 0.6639      | 6783.49316   | 170.30302    | 6.6977  |
| 2      | 17.973        | MM   | 0.9392      | 9.44969e4    | 1676.85071   | 93.3023 |

Totals : 1.01280e5 1847.15373

→ 87% ee

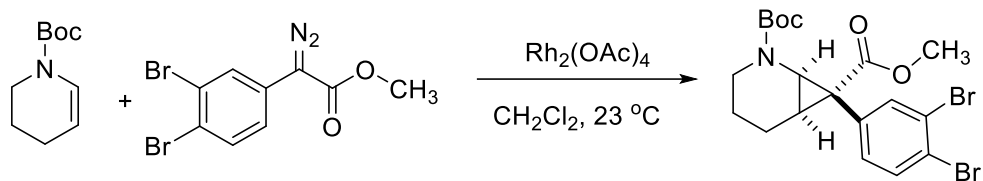

US17-racemic-ADH\_60min\_1mL\_1%-230nm.METH11.DATA - Prostar 325 Absorbance Channel 1 LC1006M831

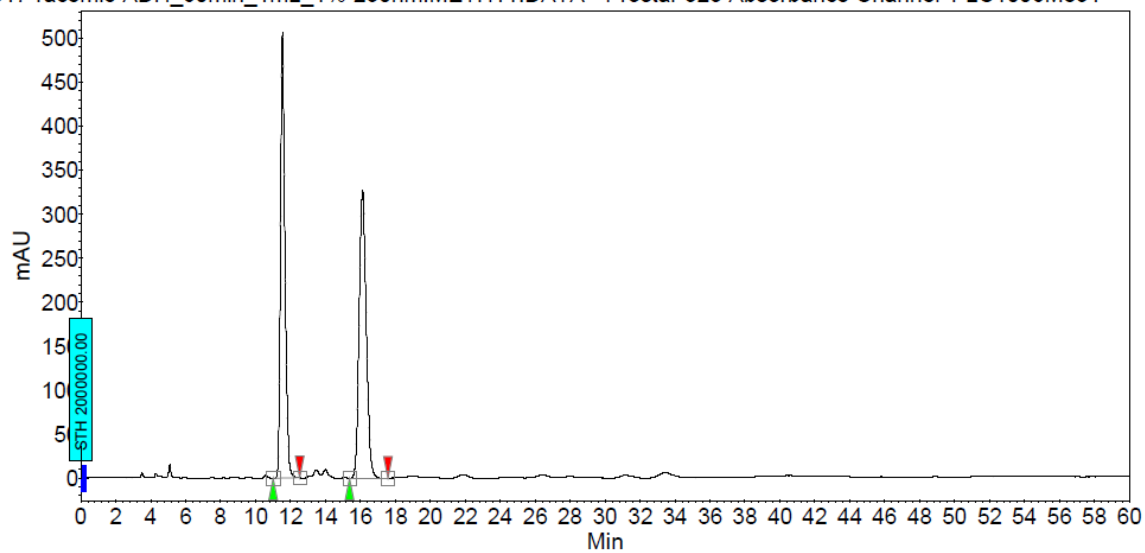

**Peak results :**

| Index | Name    | Time [Min] | Quantity [% Area] | Height [mAU] | Area [mAU.Min] | Area % [%] |
|-------|---------|------------|-------------------|--------------|----------------|------------|
| 1     | UNKNOWN | 11.53      | 49.47             | 506.0        | 151.9          | 49.469     |
| 2     | UNKNOWN | 16.11      | 50.53             | 327.1        | 155.2          | 50.531     |
| Total |         |            | 100.00            | 833.1        | 307.1          | 100.000    |

Racemic standard

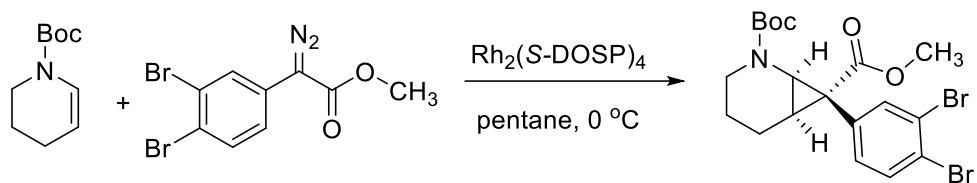

(Table 2, **8e**)

US22-chiral-ADH\_60min\_1mL\_1%-230nm.METH6.DATA - Prostar 325 Absorbance Channel 1 LC1006M831

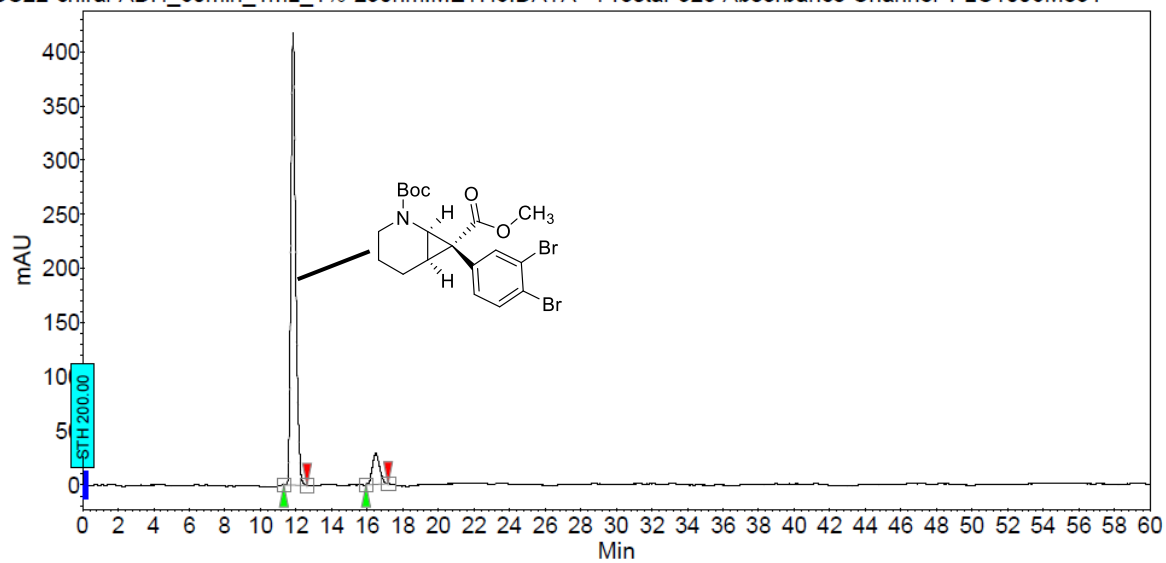

Peak results :

| Index | Name    | Time [Min] | Quantity [% Area] | Height [mAU] | Area [mAU.Min] | Area % [%] |
|-------|---------|------------|-------------------|--------------|----------------|------------|
| 1     | UNKNOWN | 11.82      | 90.57             | 417.3        | 131.9          | 90.570     |
| 2     | UNKNOWN | 16.48      | 9.43              | 29.1         | 13.7           | 9.430      |
| Total |         |            | 100.00            | 446.4        | 145.6          | 100.000    |

→ 81% ee

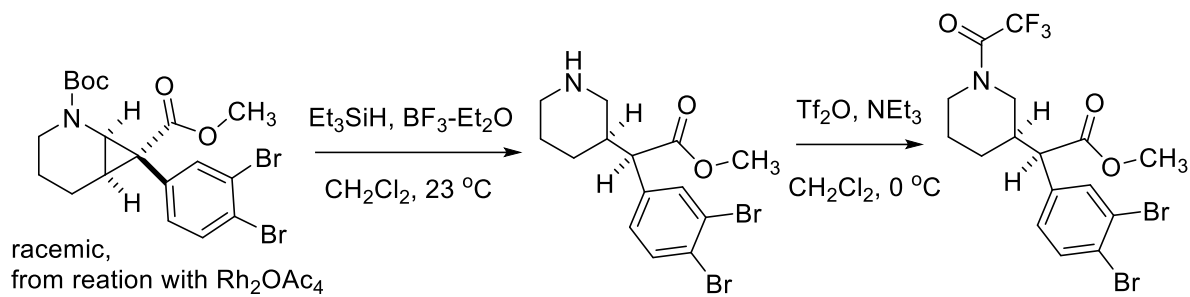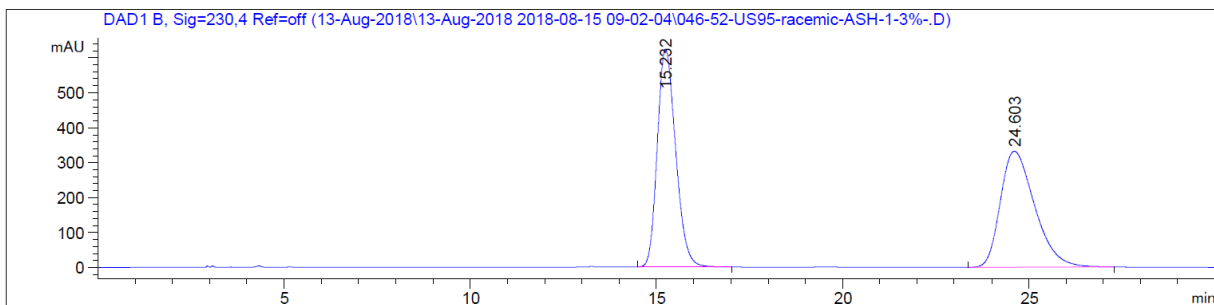

Signal 2: DAD1 B, Sig=230,4 Ref=off

| Peak # | RetTime [min] | Type | Width [min] | Area [mAU*s] | Height [mAU] | Area %  |
|--------|---------------|------|-------------|--------------|--------------|---------|
| 1      | 15.232        | BB   | 0.5249      | 2.13657e4    | 624.02716    | 50.0539 |
| 2      | 24.603        | BB   | 0.7578      | 2.13197e4    | 332.38715    | 49.9461 |

Totals :                                    4.26853e4    956.41431

Racemic standard



### 10.3. C4 Functionalization Products

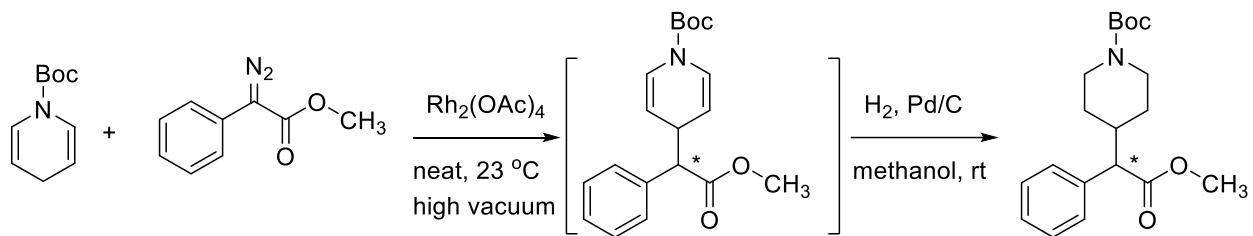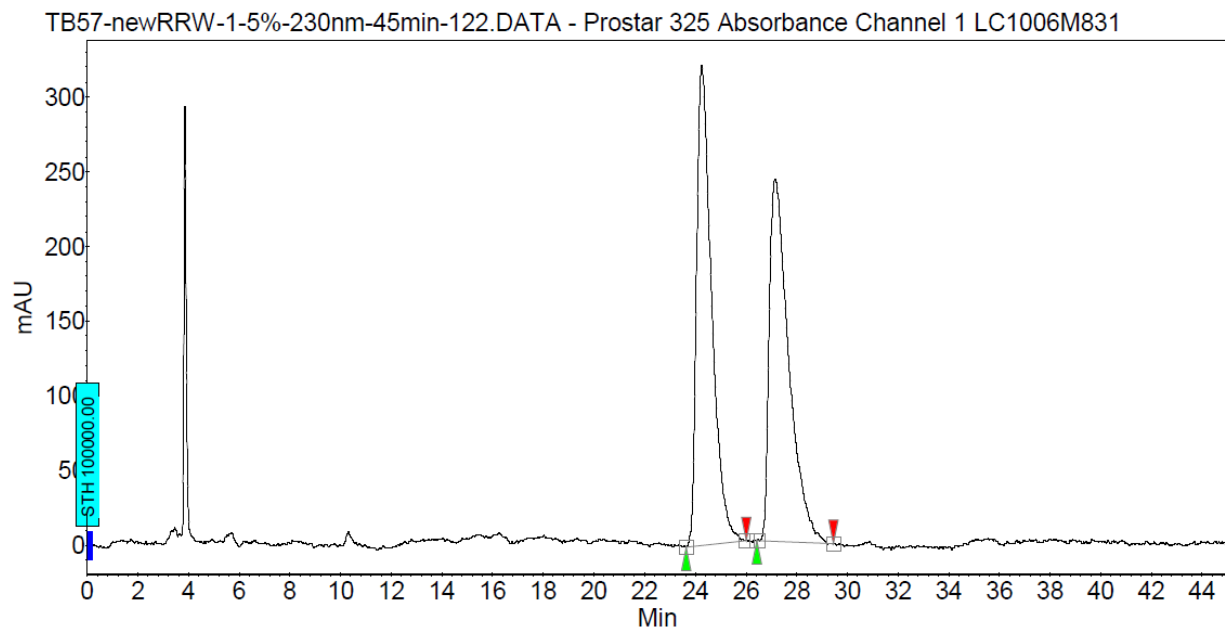

#### Peak results :

| Index | Name    | Time [Min] | Quantity [% Area] | Height [mAU] | Area [mAU.Min] | Area % [%] |
|-------|---------|------------|-------------------|--------------|----------------|------------|
| 1     | UNKNOWN | 24.25      | 50.52             | 321.4        | 221.2          | 50.515     |
| 2     | UNKNOWN | 27.15      | 49.48             | 242.5        | 216.7          | 49.485     |
| Total |         |            | 100.00            | 563.9        | 437.9          | 100.000    |

Racemic standard



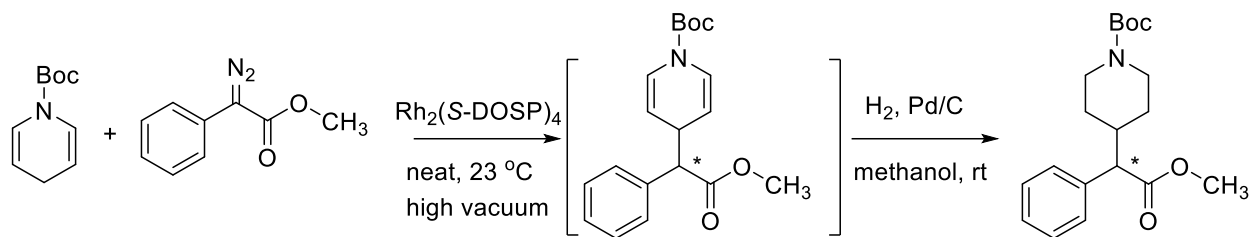

(Table S4, entry 5)

US62-(R,R)-Whehk\_45min\_1mL\_5%\_230nm.METH3.DATA - Prostar 325 Absorbance Channel 1 LC1006M831

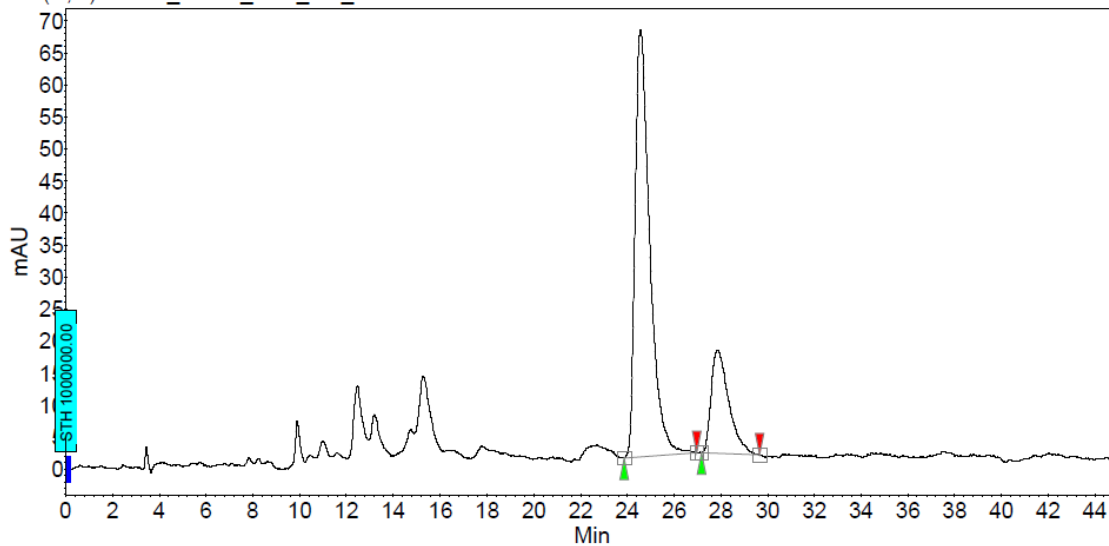

Peak results :

| Index | Name    | Time [Min] | Quantity [% Area] | Height [mAU] | Area [mAU.Min] | Area % [%] |
|-------|---------|------------|-------------------|--------------|----------------|------------|
| 1     | UNKNOWN | 24.57      | 77.70             | 66.6         | 48.7           | 77.704     |
| 2     | UNKNOWN | 27.86      | 22.30             | 16.1         | 14.0           | 22.296     |
| Total |         |            | 100.00            | 82.7         | 62.7           | 100.000    |

→ -55% ee

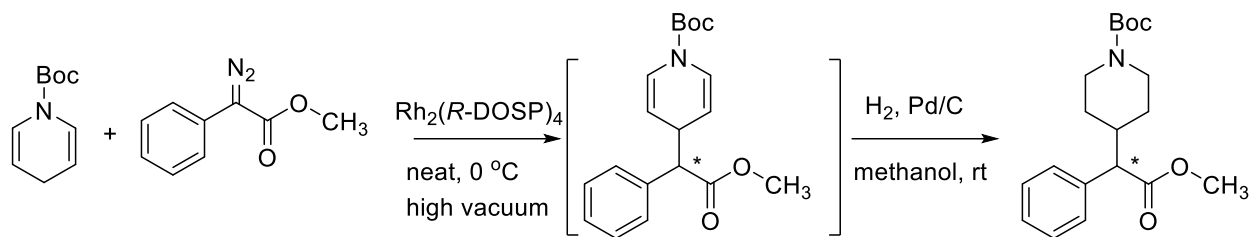

(Scheme 3) (Table S4, entry 6)

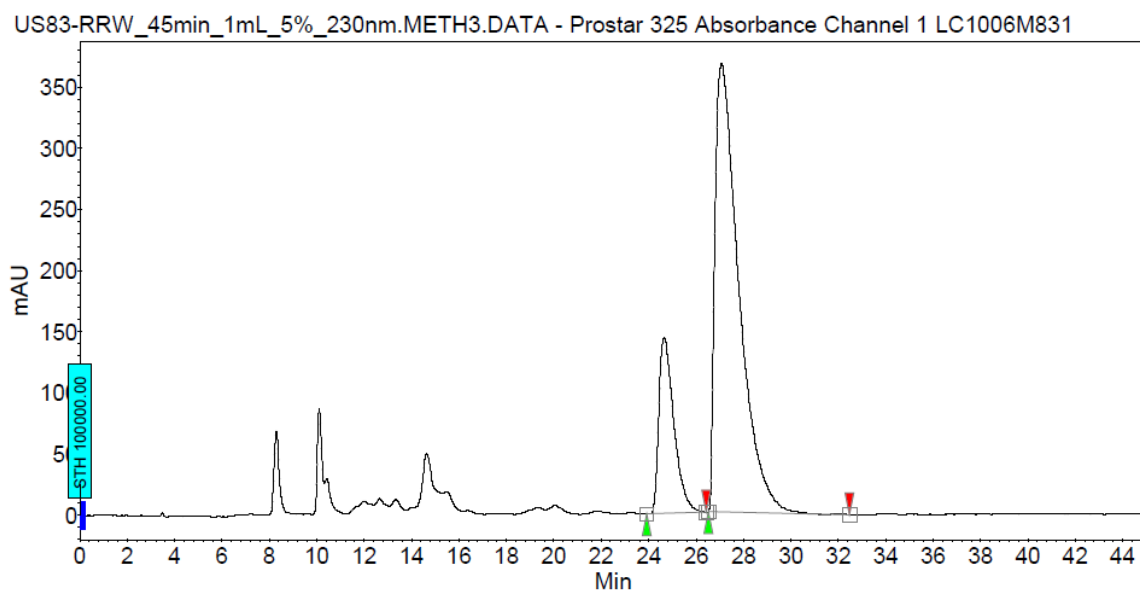

**Peak results :**

| Index | Name    | Time [Min] | Quantity [% Area] | Height [mAU] | Area [mAU.Min] | Area % [%] |
|-------|---------|------------|-------------------|--------------|----------------|------------|
| 1     | UNKNOWN | 24.65      | 19.72             | 143.3        | 105.2          | 19.719     |
| 2     | UNKNOWN | 27.08      | 80.28             | 365.6        | 428.4          | 80.281     |
| Total |         |            | 100.00            | 508.9        | 533.7          | 100.000    |

→ 61% ee

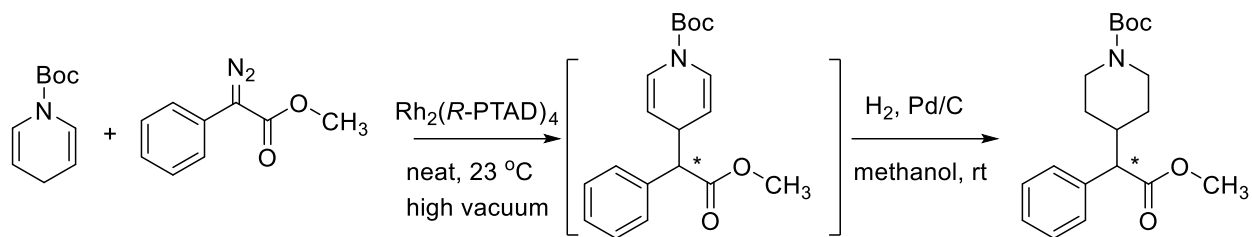

(Table S4, entry 7)

US63-(R,R)-Wheik\_45min\_1mL\_5%\_230nm.METH6.DATA - Prostar 325 Absorbance Channel 1 LC1006M831

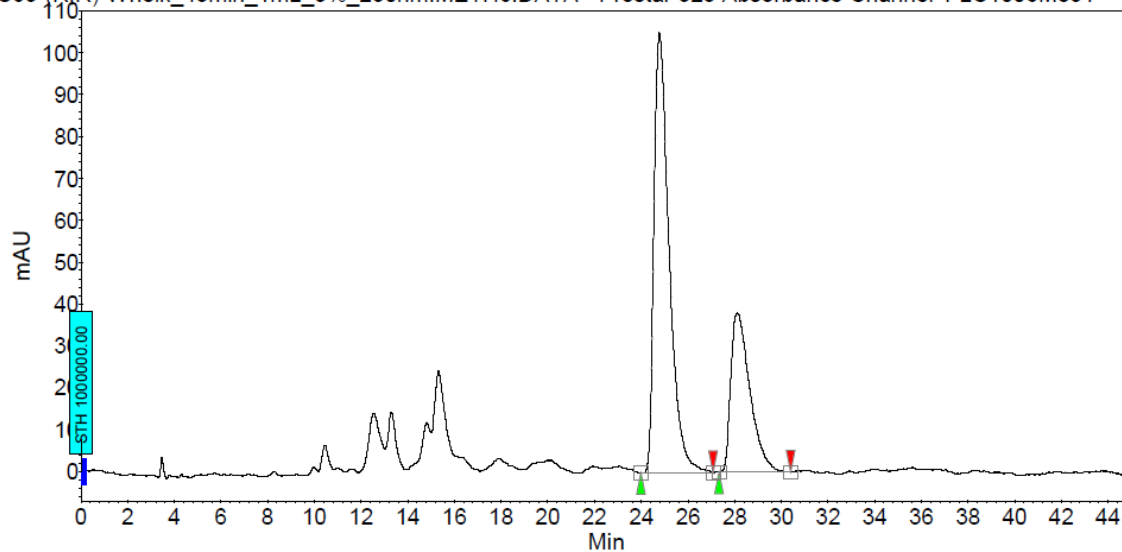

Peak results :

| Index | Name    | Time [Min] | Quantity [% Area] | Height [mAU] | Area [mAU.Min] | Area % [%] |
|-------|---------|------------|-------------------|--------------|----------------|------------|
| 1     | UNKNOWN | 24.77      | 68.58             | 105.1        | 78.7           | 68.577     |
| 2     | UNKNOWN | 28.13      | 31.42             | 37.9         | 36.0           | 31.423     |
| Total |         |            | 100.00            | 143.1        | 114.7          | 100.000    |

→ -37% ee

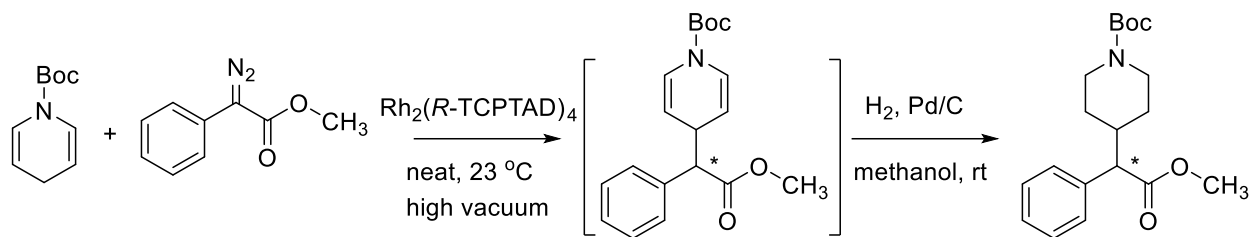

(Table S4, entry 8)

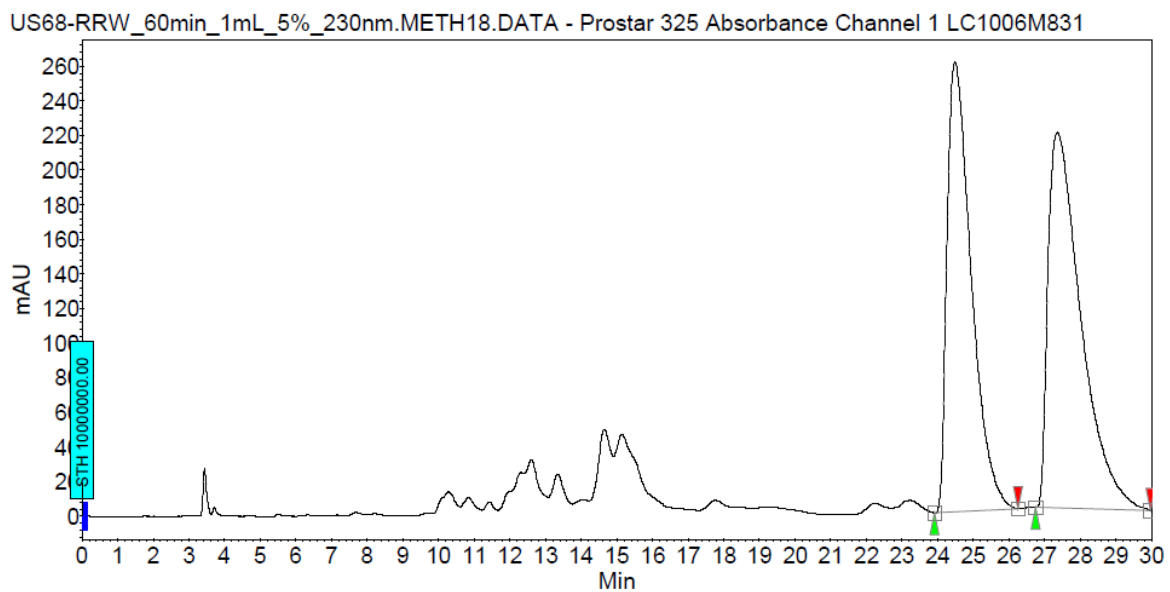

Peak results :

| Index | Name    | Time [Min] | Quantity [% Area] | Height [mAU] | Area [mAU.Min] | Area % [%] |
|-------|---------|------------|-------------------|--------------|----------------|------------|
| 1     | UNKNOWN | 24.48      | 46.92             | 259.6        | 204.8          | 46.918     |
| 2     | UNKNOWN | 27.36      | 53.08             | 216.7        | 231.7          | 53.082     |
| Total |         |            | 100.00            | 476.3        | 436.5          | 100.000    |

→ 6% ee

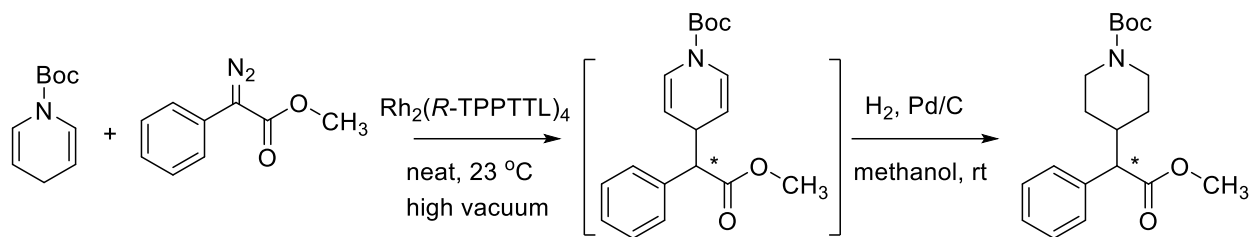

(Table S4, entry 9)

US76-RRW\_45min\_1mL\_5%\_230nm.METH18.DATA - Prostar 325 Absorbance Channel 1 LC1006M831

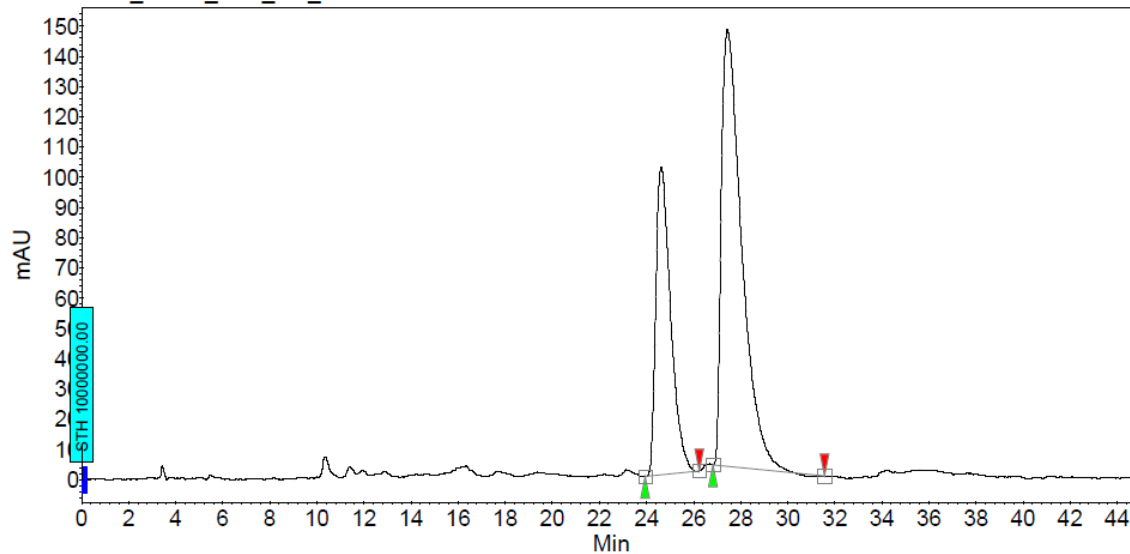

**Peak results :**

| Index | Name    | Time [Min] | Quantity [% Area] | Height [mAU] | Area [mAU.Min] | Area % [%] |
|-------|---------|------------|-------------------|--------------|----------------|------------|
| 1     | UNKNOWN | 24.62      | 33.79             | 101.7        | 74.0           | 33.794     |
| 2     | UNKNOWN | 27.44      | 66.21             | 144.4        | 145.1          | 66.206     |
| Total |         |            | 100.00            | 246.1        | 219.1          | 100.000    |

→ 32% ee

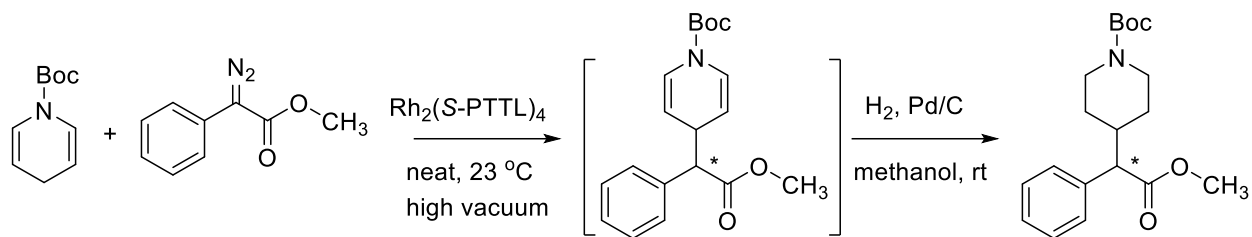

(Table S4, entry 10)

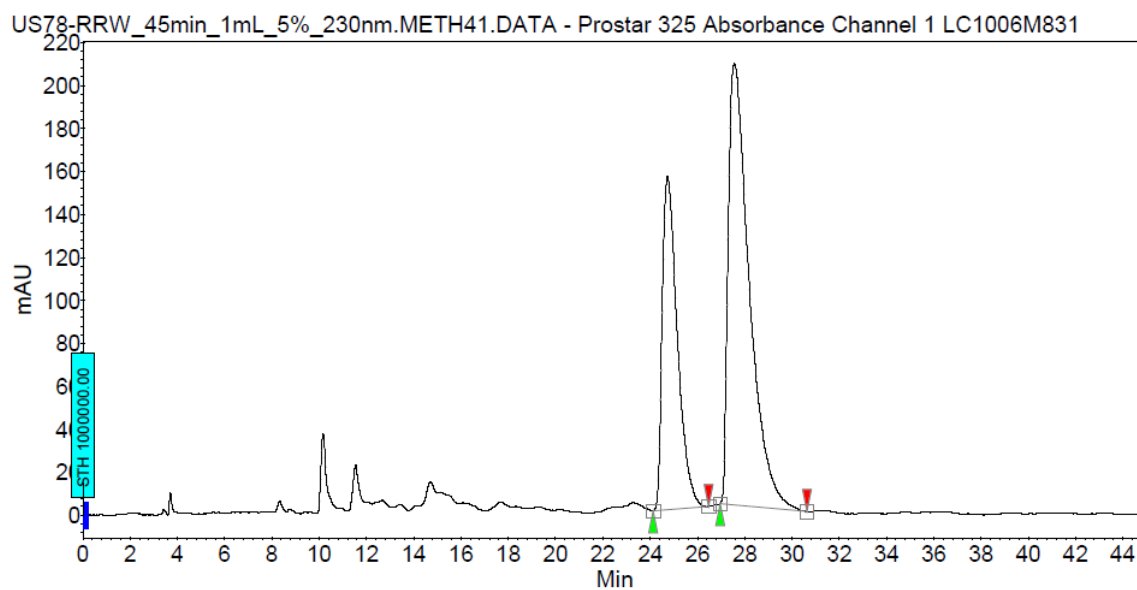

Peak results :

| Index | Name    | Time [Min] | Quantity [% Area] | Height [mAU] | Area [mAU.Min] | Area % [%] |
|-------|---------|------------|-------------------|--------------|----------------|------------|
| 1     | UNKNOWN | 24.73      | 35.09             | 155.3        | 114.7          | 35.085     |
| 2     | UNKNOWN | 27.56      | 64.91             | 205.2        | 212.2          | 64.915     |
| Total |         |            | 100.00            | 360.5        | 326.9          | 100.000    |

→ 30% ee

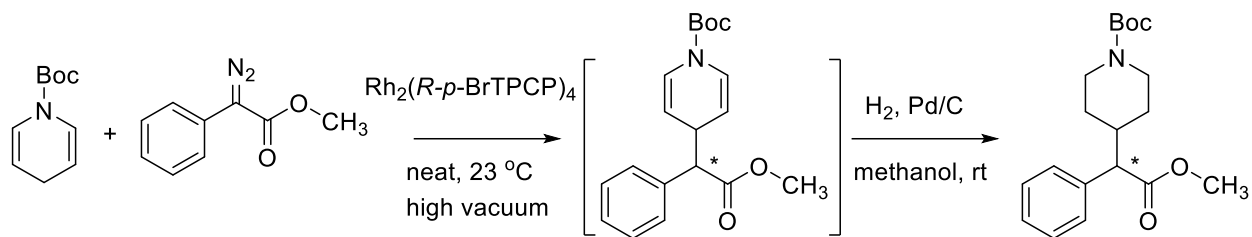

(Table S4, entry 11)

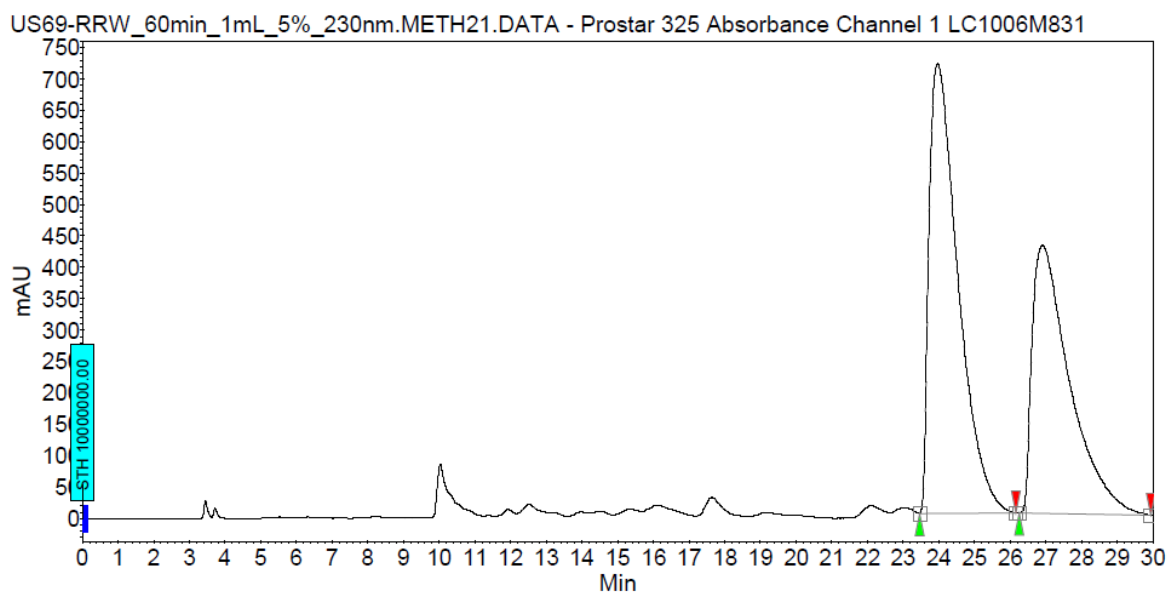

**Peak results :**

| Index | Name    | Time [Min] | Quantity [% Area] | Height [mAU] | Area [mAU.Min] | Area % [%] |
|-------|---------|------------|-------------------|--------------|----------------|------------|
| 1     | UNKNOWN | 23.96      | 56.57             | 716.0        | 675.4          | 56.571     |
| 2     | UNKNOWN | 26.90      | 43.43             | 426.6        | 518.5          | 43.429     |
| Total |         |            | 100.00            | 1142.6       | 1193.9         | 100.000    |

→ -13% ee

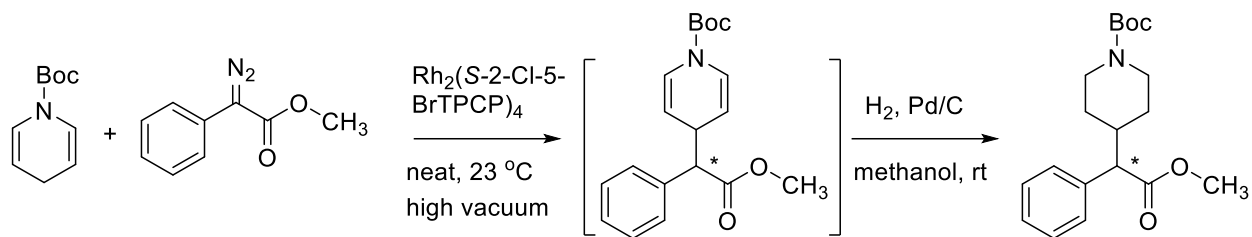

(Table S4, entry 13)

US72-RRW\_45min\_1mL\_5%\_230nm.METH9.DATA - Prostar 325 Absorbance Channel 1 LC1006M831

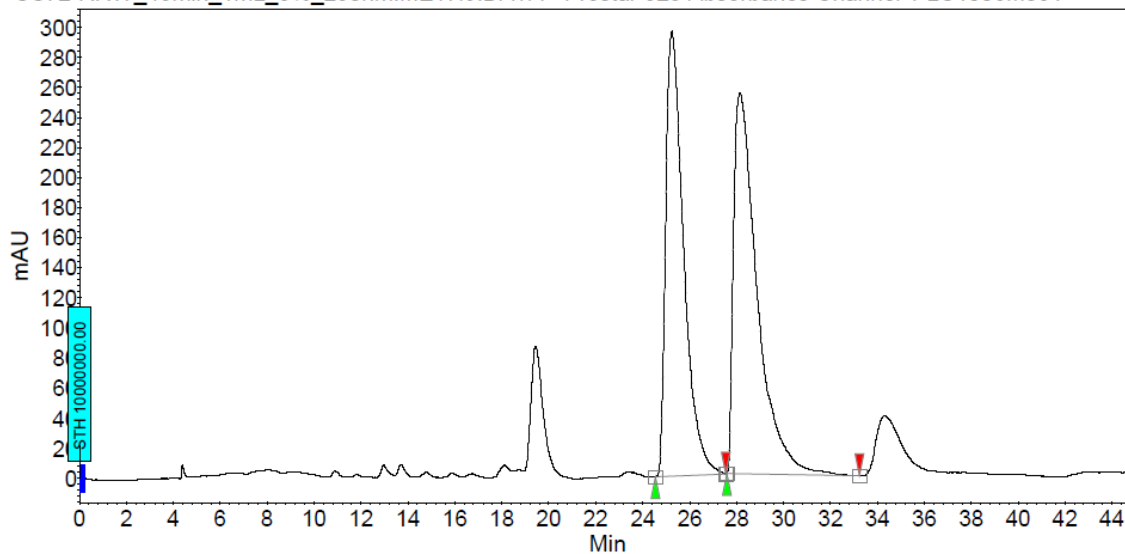

Peak results :

| Index | Name    | Time [Min] | Quantity [% Area] | Height [mAU] | Area [mAU.Min] | Area % [%] |
|-------|---------|------------|-------------------|--------------|----------------|------------|
| 1     | UNKNOWN | 25.24      | 46.98             | 295.8        | 261.7          | 46.975     |
| 2     | UNKNOWN | 28.14      | 53.02             | 252.8        | 295.4          | 53.025     |
| Total |         |            | 100.00            | 548.6        | 557.1          | 100.000    |

→ 6% ee



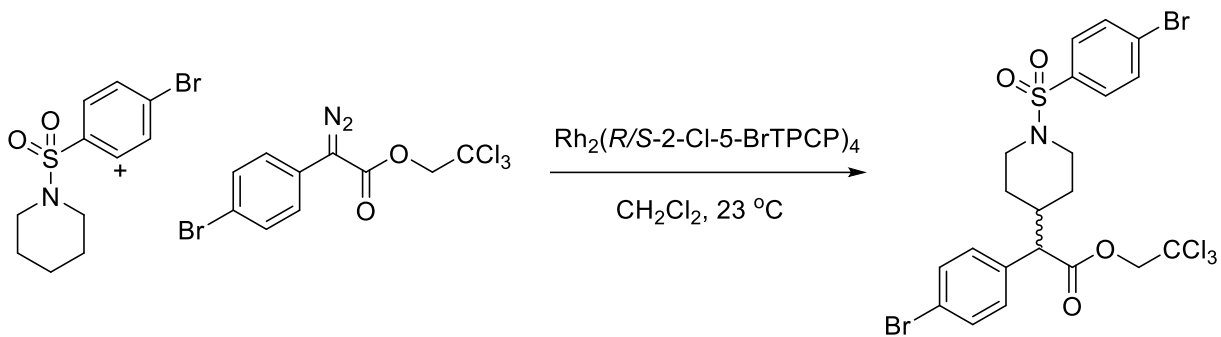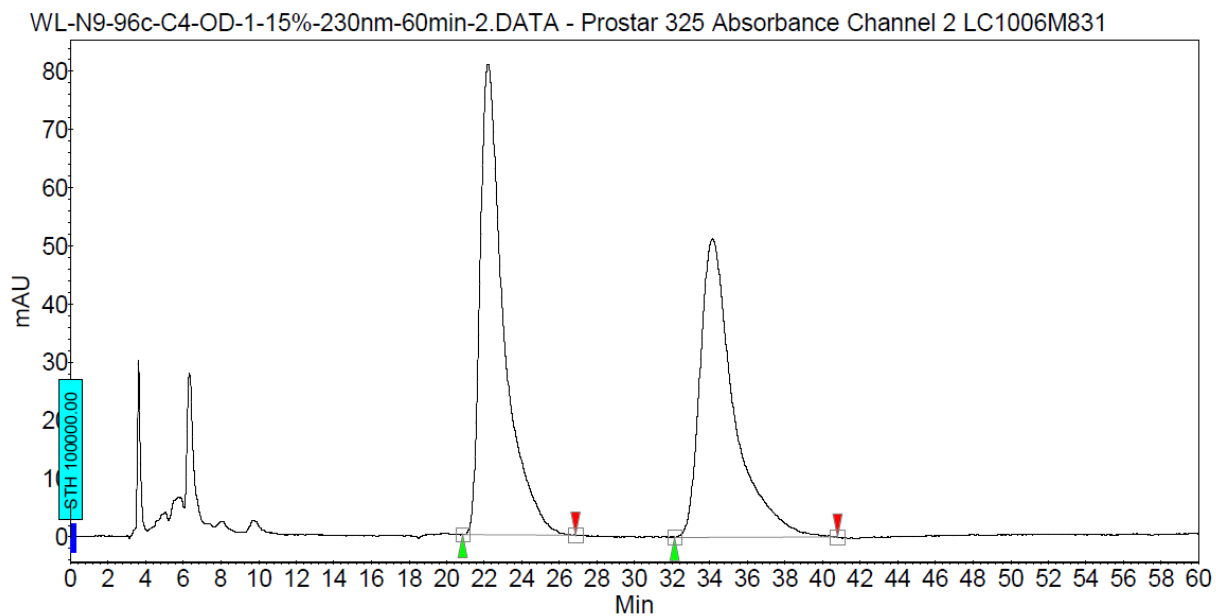

**Peak results :**

| Index | Name    | Time [Min] | Quantity [% Area] | Height [mAU] | Area [mAU.Min] | Area % [%] |
|-------|---------|------------|-------------------|--------------|----------------|------------|
| 1     | UNKNOWN | 22.21      | 52.56             | 80.8         | 118.0          | 52.557     |
| 2     | UNKNOWN | 34.15      | 47.44             | 51.2         | 106.5          | 47.443     |
| Total |         |            | 100.00            | 132.0        | 224.5          | 100.000    |

Racemic standard

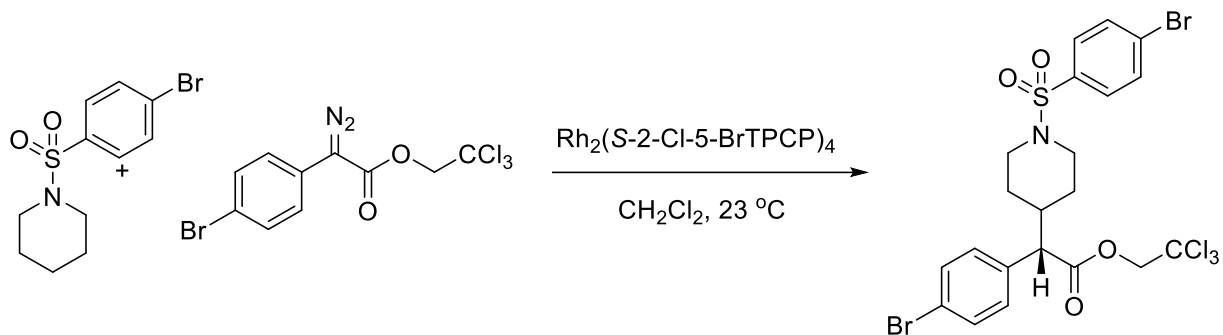

(Table 4, entry 4) (Table S5, entry 5)

WL-N9-82-C4(f2030)-OD-1-15%-230nm-60min-14.DATA - Prostar 325 Absorbance Channel 2 LC1006M831

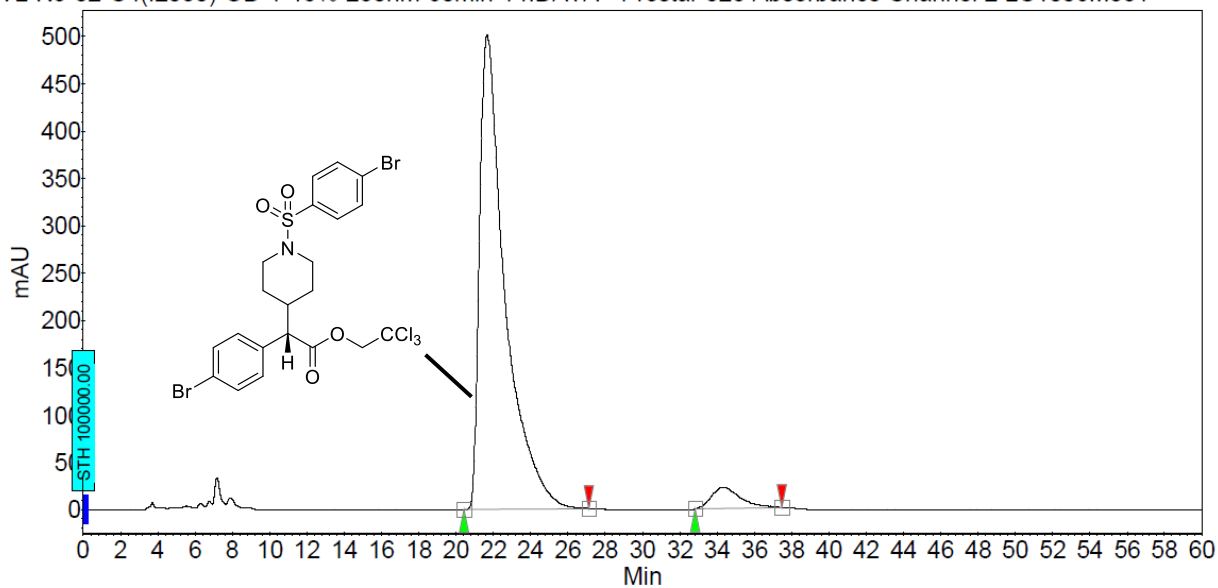

**Peak results :**

| Index | Name    | Time [Min] | Quantity [% Area] | Height [mAU] | Area [mAU.Min] | Area % [%] |
|-------|---------|------------|-------------------|--------------|----------------|------------|
| 1     | UNKNOWN | 21.66      | 95.12             | 501.8        | 791.9          | 95.123     |
| 2     | UNKNOWN | 34.30      | 4.88              | 22.4         | 40.6           | 4.877      |
| Total |         |            | 100.00            | 524.2        | 832.5          | 100.000    |

→ 90% ee

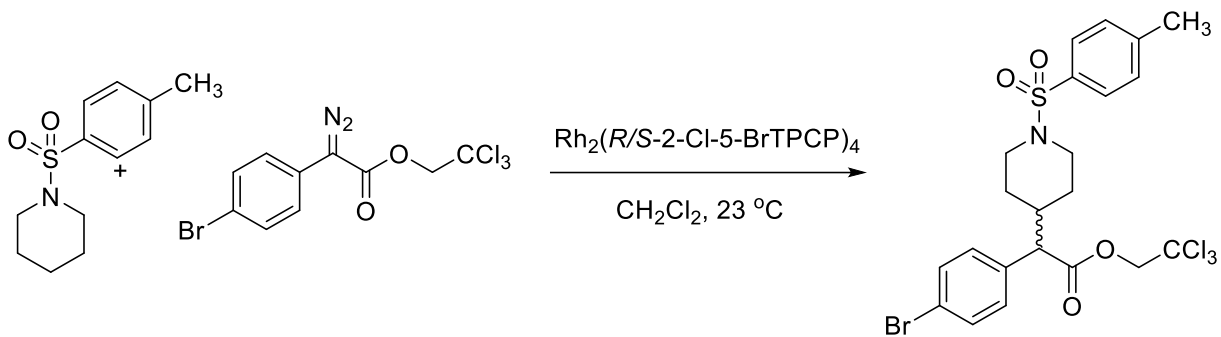

WL-N9-96b-C4-OD-1-10%-230nm-60min-39.DATA - Prostar 325 Absorbance Channel 2 LC1006M831

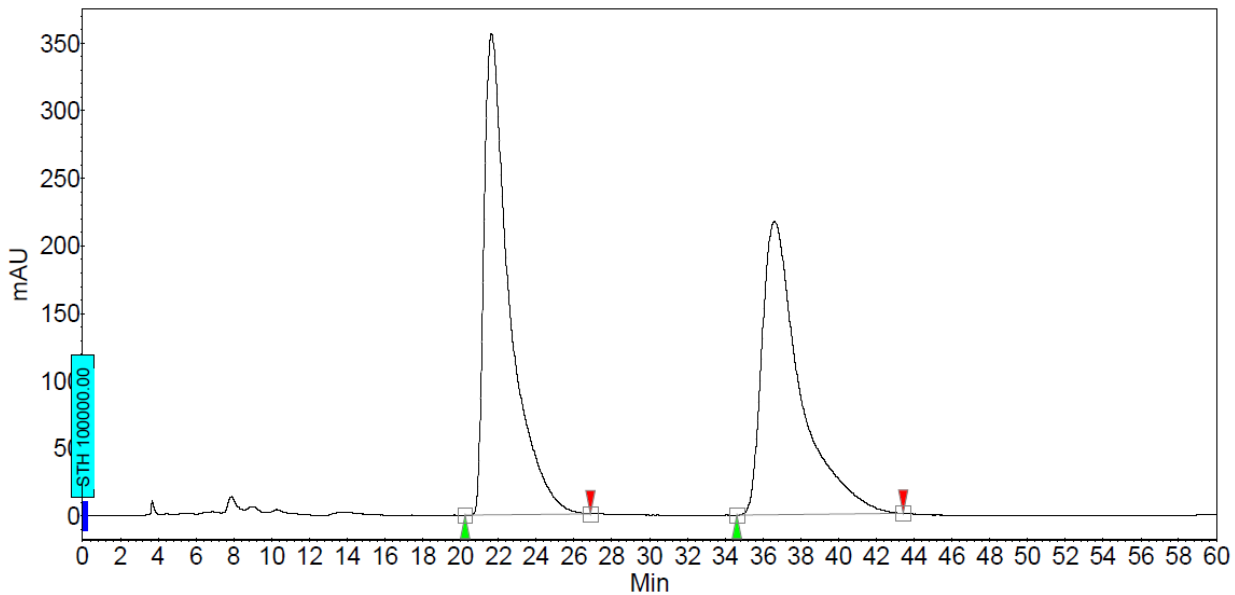

**Peak results :**

| Index | Name    | Time [Min] | Quantity [% Area] | Height [mAU] | Area [mAU.Min] | Area % [%] |
|-------|---------|------------|-------------------|--------------|----------------|------------|
| 1     | UNKNOWN | 21.64      | 52.44             | 357.0        | 558.3          | 52.437     |
| 2     | UNKNOWN | 36.61      | 47.56             | 217.3        | 506.4          | 47.563     |
| Total |         |            | 100.00            | 574.2        | 1064.7         | 100.000    |

Racemic standard

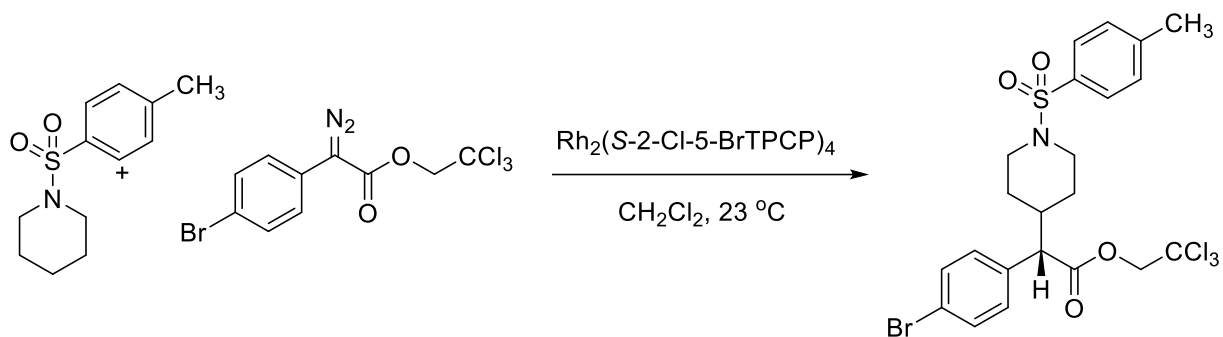

(Table 4, entry 5) (Table S5, entry 6)

WL-N9-80-2nd-f37-C4-OD-1-10%-230nm-60min-87.DATA - Prostar 325 Absorbance Channel 2 LC1006M831

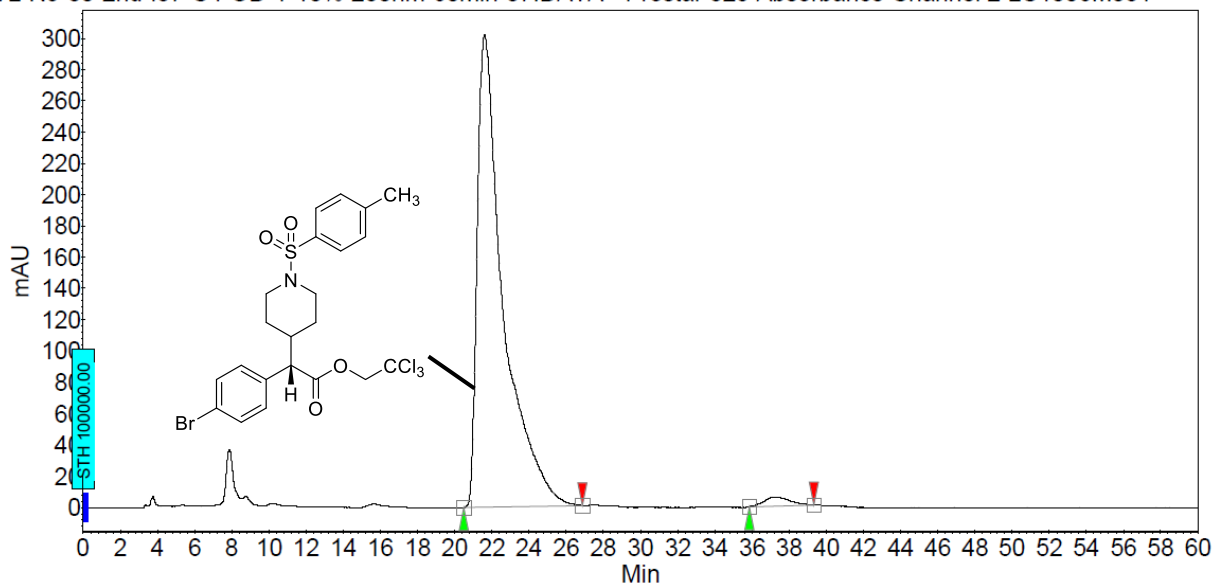

**Peak results :**

| Index | Name    | Time [Min] | Quantity [% Area] | Height [mAU] | Area [mAU.Min] | Area % [%] |
|-------|---------|------------|-------------------|--------------|----------------|------------|
| 1     | UNKNOWN | 21.61      | 98.15             | 302.2        | 486.7          | 98.149     |
| 2     | UNKNOWN | 37.29      | 1.85              | 5.7          | 9.2            | 1.851      |
| Total |         |            | 100.00            | 308.0        | 495.9          | 100.000    |

→ 96% ee

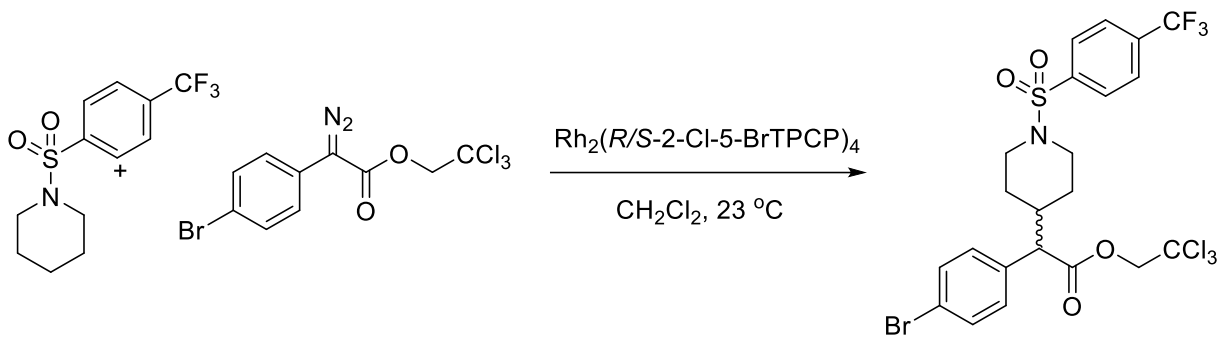

WL-N9-147-C4(f2223)-RRW-1-20%-230nm-60min-64.DATA - Prostar 325 Absorbance Channel 1 LC1006M831

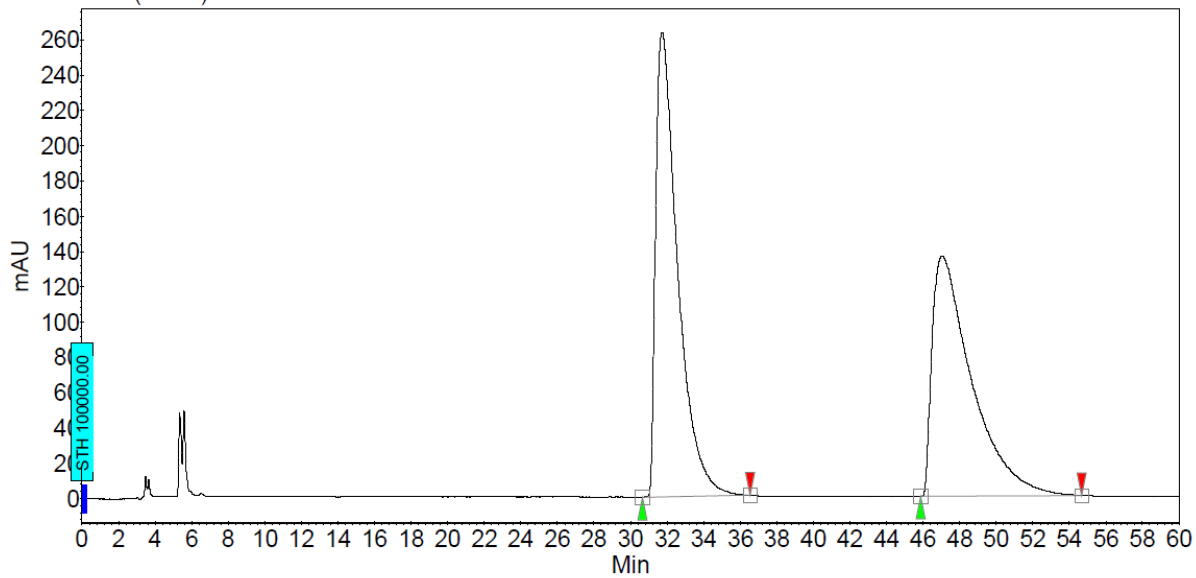

**Peak results :**

| Index | Name    | Time [Min] | Quantity [% Area] | Height [mAU] | Area [mAU.Min] | Area % [%] |
|-------|---------|------------|-------------------|--------------|----------------|------------|
| 1     | UNKNOWN | 31.73      | 51.86             | 263.1        | 367.2          | 51.857     |
| 2     | UNKNOWN | 47.04      | 48.14             | 136.1        | 340.9          | 48.143     |
| Total |         |            | 100.00            | 399.3        | 708.0          | 100.000    |

Racemic standard

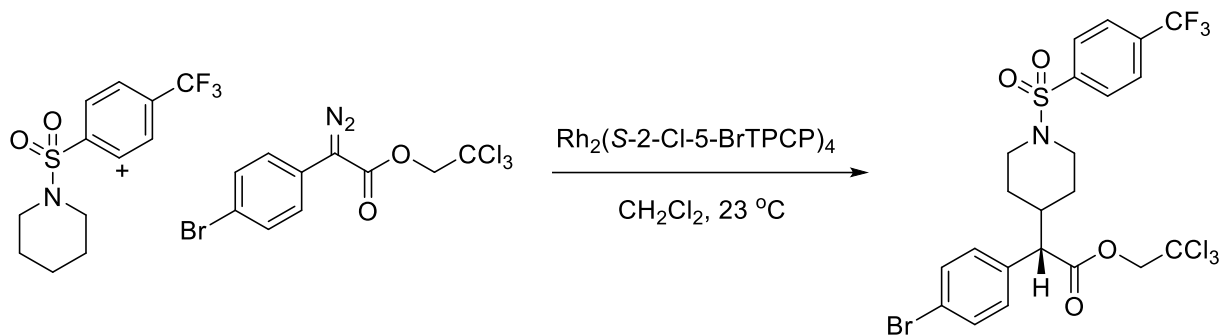

(Table 4, entry 6) (Table S5, entry 8)

WL-N9-146-C4(f2028)-RRW-1-20%-230nm-60min-5.DATA - Prostar 325 Absorbance Channel 1 LC1006M831

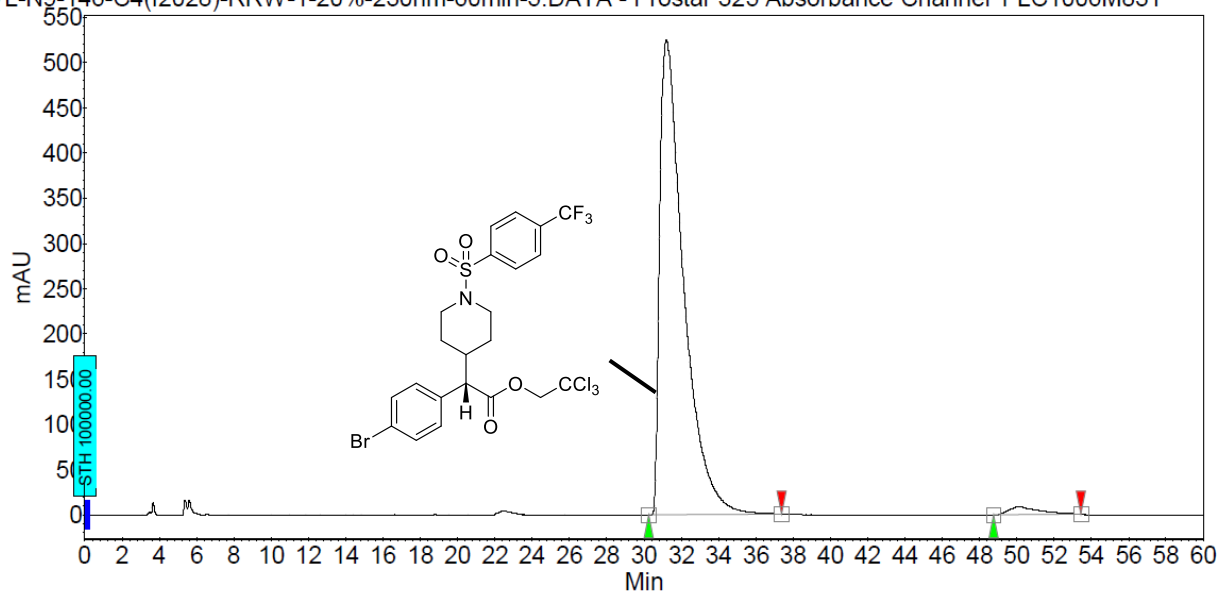

**Peak results :**

| Index | Name    | Time [Min] | Quantity [% Area] | Height [mAU] | Area [mAU.Min] | Area % [%] |
|-------|---------|------------|-------------------|--------------|----------------|------------|
| 1     | UNKNOWN | 31.20      | 97.94             | 524.9        | 780.3          | 97.938     |
| 2     | UNKNOWN | 50.10      | 2.06              | 8.1          | 16.4           | 2.062      |
| Total |         |            | 100.00            | 533.0        | 796.7          | 100.000    |

→ 96% ee

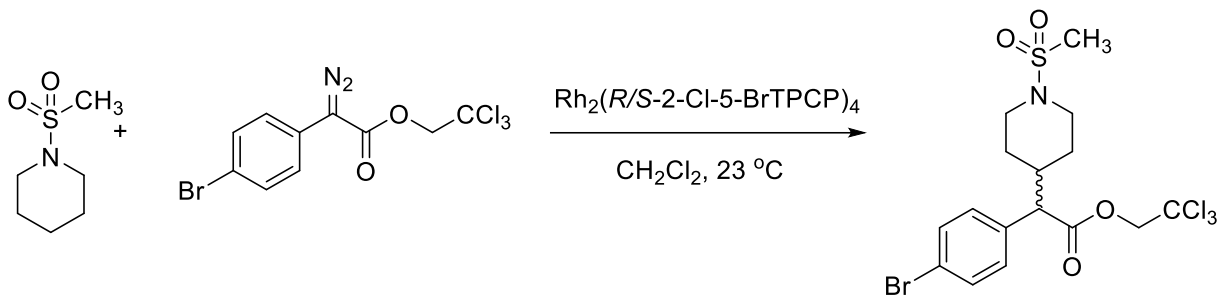

WL-N9-120b-C4(f5051)-RRW-1-20%-230nm-80min-2.DATA - Prostar 325 Absorbance Channel 1 LC1006M831

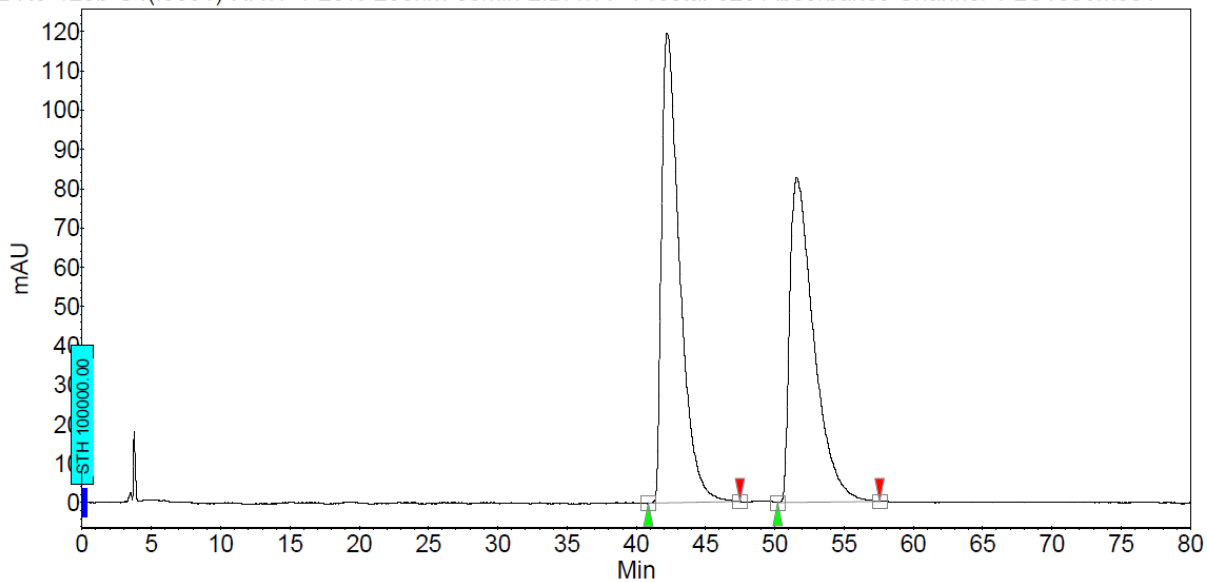

**Peak results :**

| Index | Name    | Time [Min] | Quantity [% Area] | Height [mAU] | Area [mAU.Min] | Area % [%] |
|-------|---------|------------|-------------------|--------------|----------------|------------|
| 1     | UNKNOWN | 42.24      | 52.23             | 119.7        | 182.1          | 52.227     |
| 2     | UNKNOWN | 51.59      | 47.77             | 82.7         | 166.5          | 47.773     |
| Total |         |            | 100.00            | 202.4        | 348.6          | 100.000    |

Racemic standard

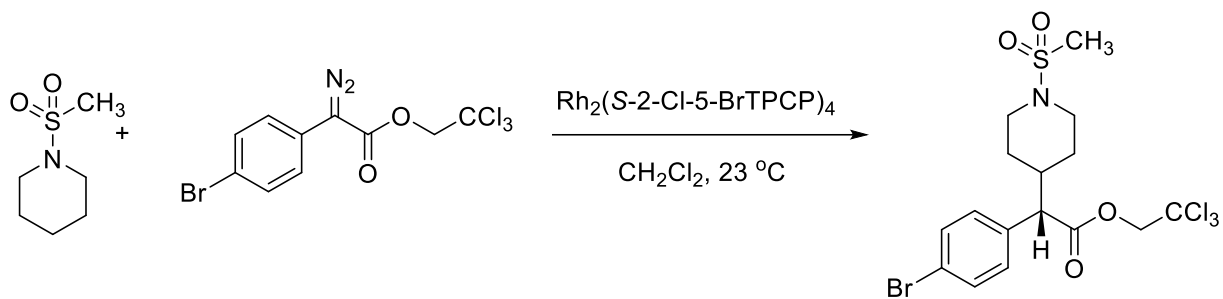

(Table 4, entry 7) (Table S5, entry 10)

WL-N9-117d-C4(f7071)-RRW-1-20%-230nm-80min-11.DATA - Prostar 325 Absorbance Channel 1 LC1006M831

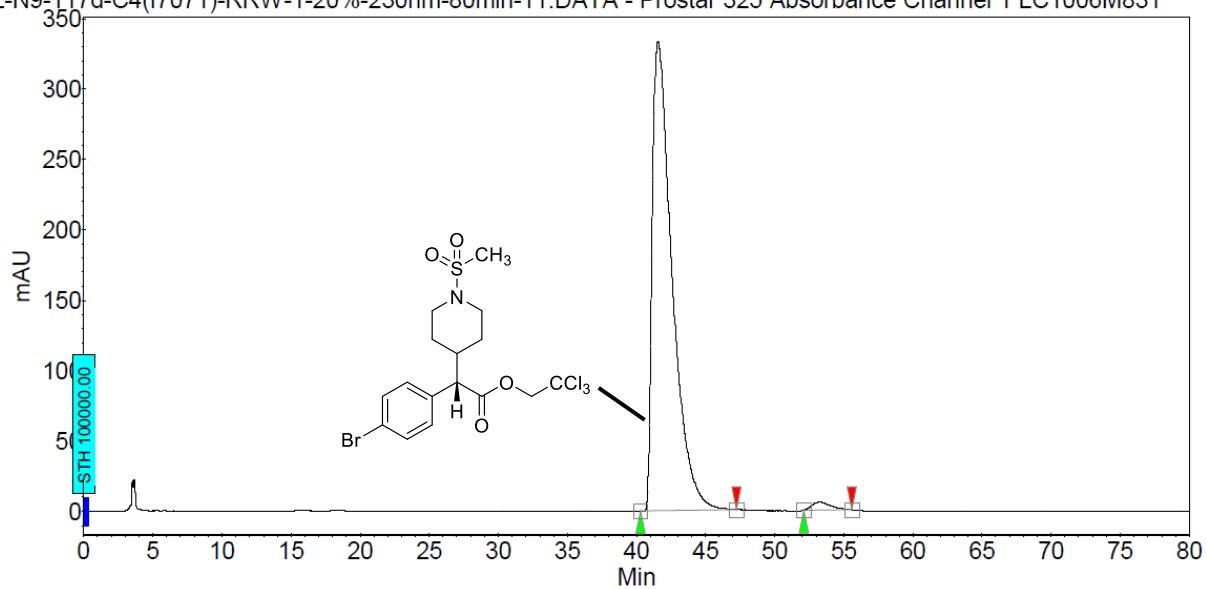

**Peak results :**

| Index | Name    | Time [Min] | Quantity [% Area] | Height [mAU] | Area [mAU.Min] | Area % [%] |
|-------|---------|------------|-------------------|--------------|----------------|------------|
| 1     | UNKNOWN | 41.56      | 98.41             | 333.7        | 556.1          | 98.413     |
| 2     | UNKNOWN | 53.30      | 1.59              | 5.6          | 9.0            | 1.587      |
| Total |         |            | 100.00            | 339.3        | 565.1          | 100.000    |

→ 97% ee



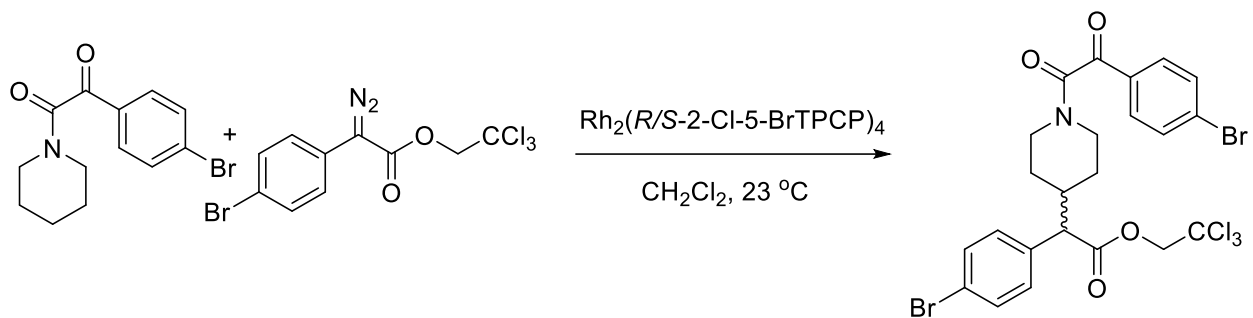

.-ELN-0009-20-C4-ADH-1-5%-230nm-80min-4\_11\_2\_2018 9\_15\_00 PM.DATA - Prostar 325 Absorbance Channel 2 LC1006M831

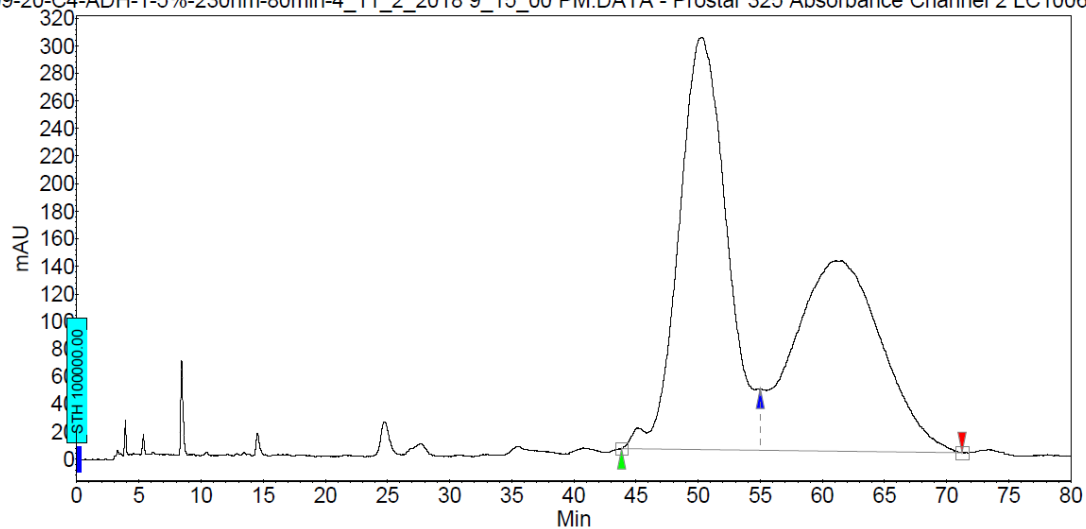

**Peak results :**

| Index | Name    | Time [Min] | Quantity [% Area] | Height [mAU] | Area [mAU.Min] | Area % [%] |
|-------|---------|------------|-------------------|--------------|----------------|------------|
| 1     | UNKNOWN | 50.31      | 53.96             | 299.2        | 1330.2         | 53.957     |
| 2     | UNKNOWN | 61.58      | 46.04             | 138.3        | 1135.1         | 46.043     |
| Total |         |            | 100.00            | 437.5        | 2465.3         | 100.000    |

Racemic standard

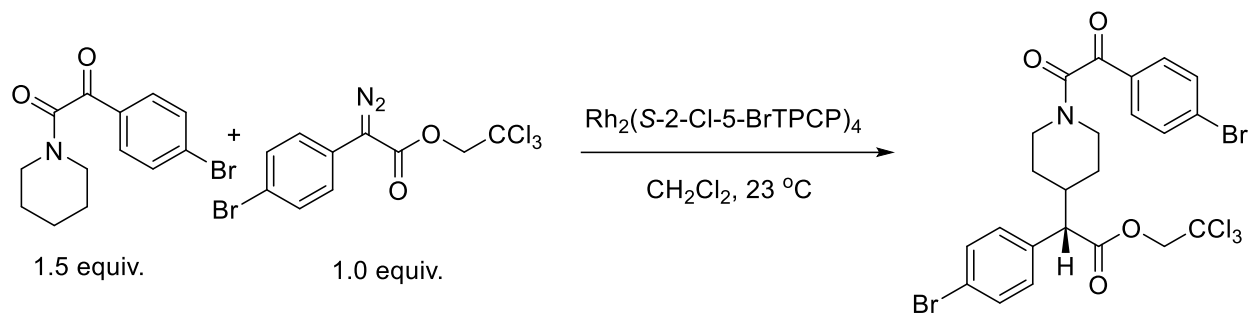

(Table 4, entry 8) (Table S5, entry 11)

-ELN-0009-19-C4-ADH-1-5%-230nm-80min-7\_11\_2\_2018 11\_24\_35 PM.DATA - Prostar 325 Absorbance Channel 2 LC1006M831

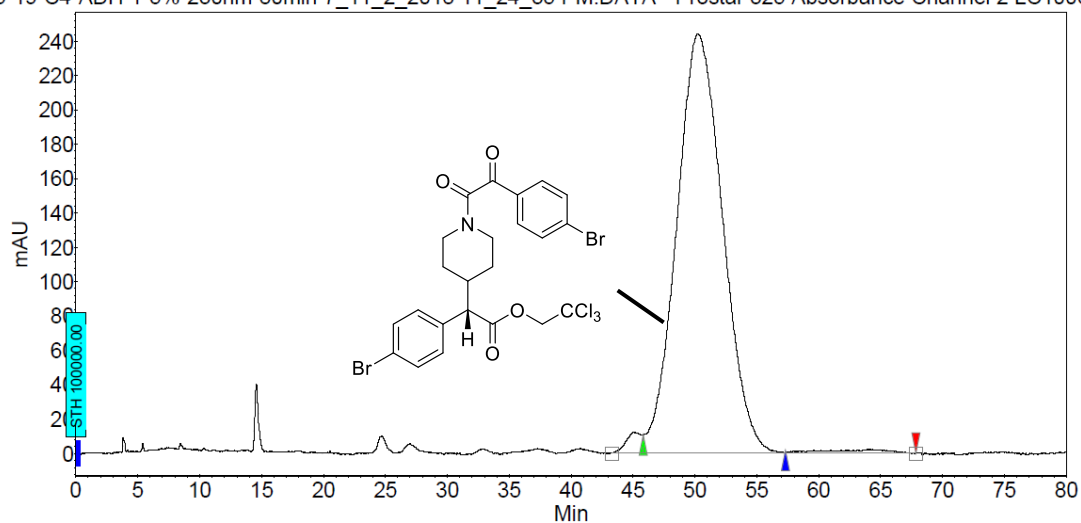

Peak results :

| Index | Name    | Time [Min] | Quantity [% Area] | Height [mAU] | Area [mAU.Min] | Area % [%] |
|-------|---------|------------|-------------------|--------------|----------------|------------|
| 1     | UNKNOWN | 50.19      | 98.74             | 244.1        | 1051.0         | 98.743     |
| 2     | UNKNOWN | 64.18      | 1.26              | 2.4          | 13.4           | 1.257      |
| Total |         |            | 100.00            | 246.5        | 1064.4         | 100.000    |

→ 97% ee

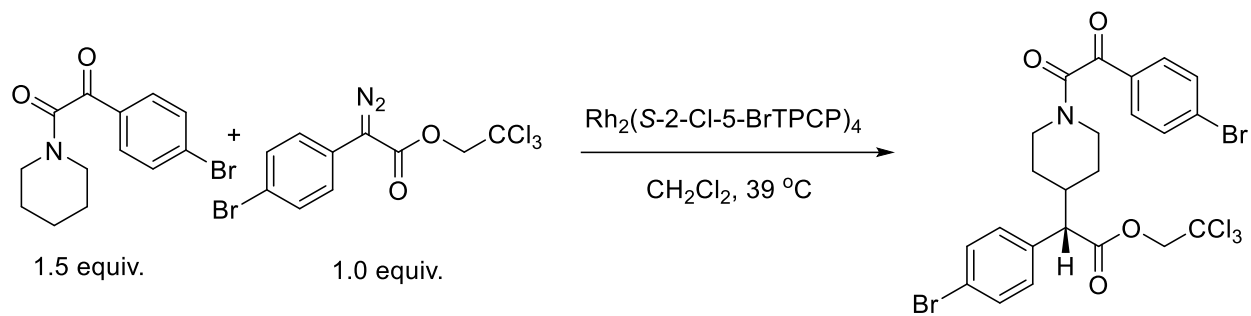

(Table 4, entry 9) (Table S5, entry 12)

WL-ELN-0009-30-C4-ADH-1-5%-230nm-80min-10.DATA - Prostar 325 Absorbance Channel 2 LC1006M831

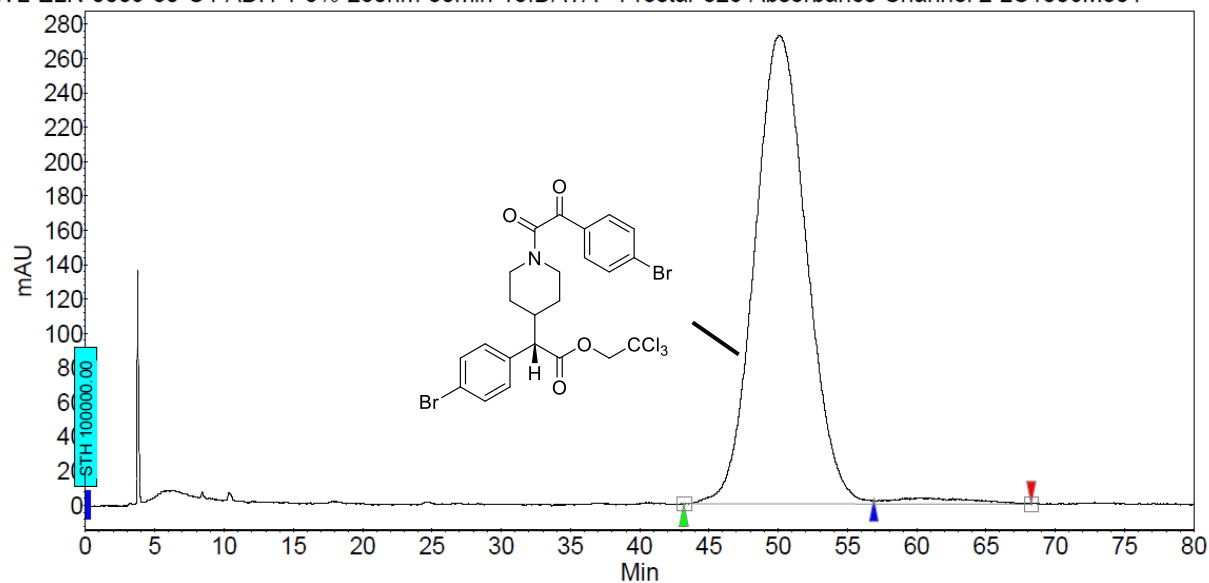

**Peak results :**

| Index | Name    | Time [Min] | Quantity [% Area] | Height [mAU] | Area [mAU.Min] | Area % [%] |
|-------|---------|------------|-------------------|--------------|----------------|------------|
| 1     | UNKNOWN | 50.11      | 98.02             | 272.6        | 1177.5         | 98.018     |
| 2     | UNKNOWN | 60.24      | 1.98              | 3.4          | 23.8           | 1.982      |
| Total |         |            | 100.00            | 276.0        | 1201.3         | 100.000    |

97% ee

→

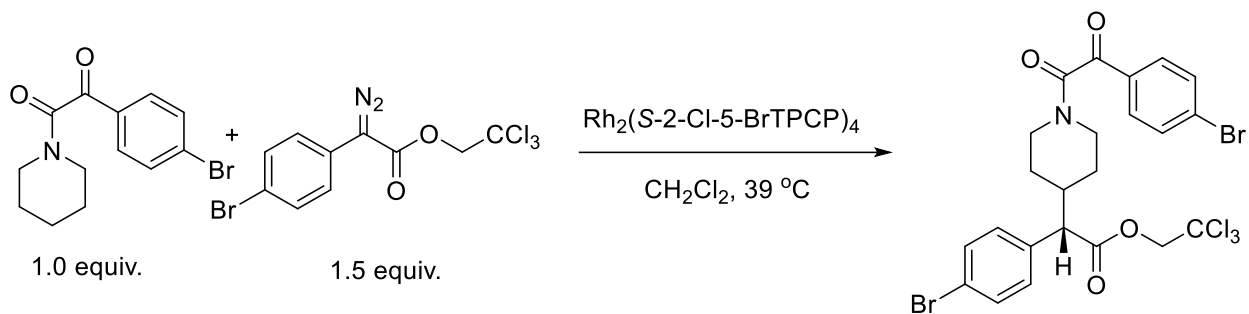

(Table 4, entry 10) (Table S5, entry 13)

WL-ELN-0009-37-C4-ADH-1-5%-230nm-80min-13.DATA - Prostar 325 Absorbance Channel 2 LC1006M831

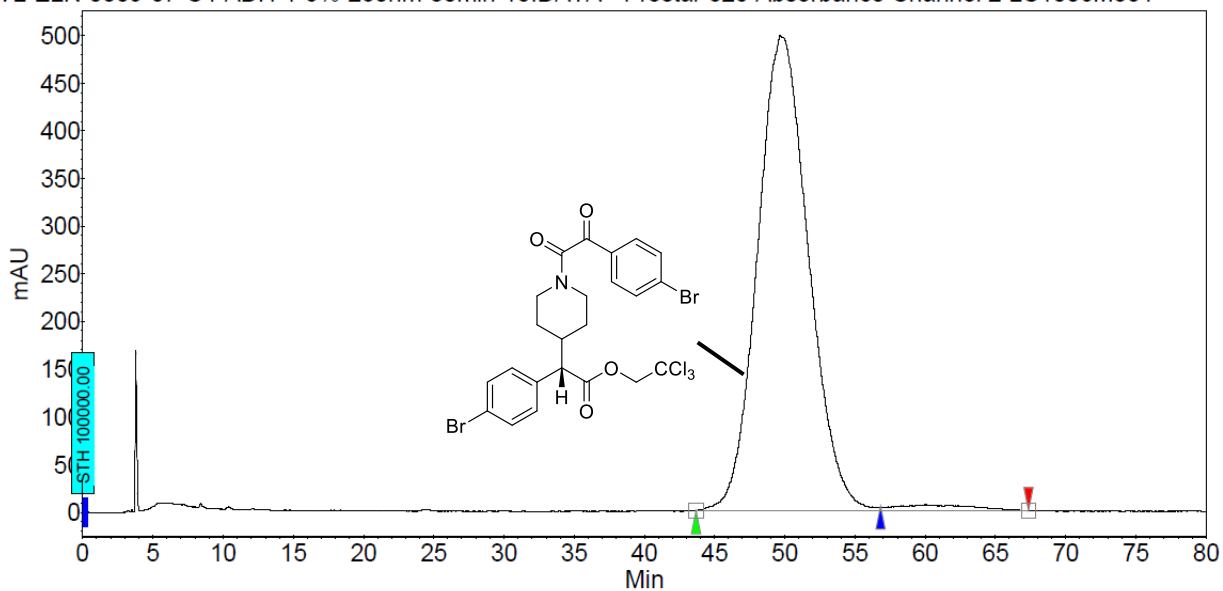

**Peak results :**

| Index | Name    | Time [Min] | Quantity [% Area] | Height [mAU] | Area [mAU.Min] | Area % [%] |
|-------|---------|------------|-------------------|--------------|----------------|------------|
| 1     | UNKNOWN | 49.67      | 98.13             | 498.7        | 2090.5         | 98.134     |
| 2     | UNKNOWN | 60.07      | 1.87              | 5.9          | 39.8           | 1.866      |
| Total |         |            | 100.00            | 504.6        | 2130.3         | 100.000    |

→ 97% ee

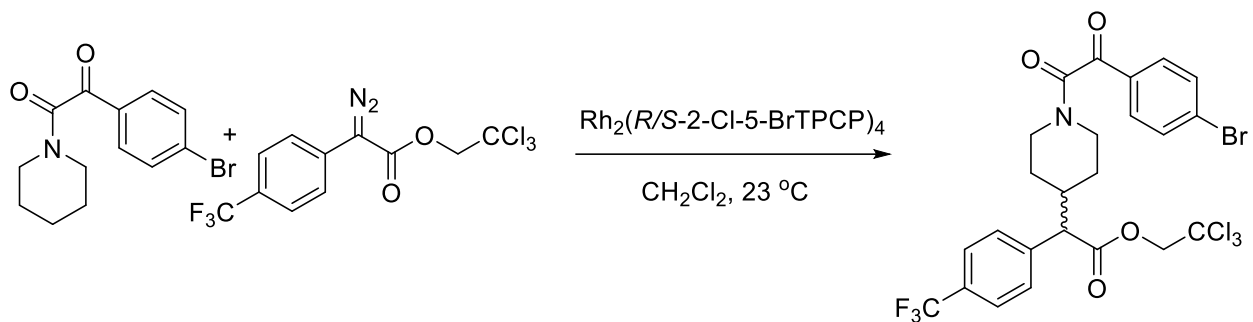

WL-ELN-0009-50rac-C4(f7475)-ODH-1-10%-230nm-45min-17.DATA - Prostar 325 Absorbance Channel 2 LC1006M831

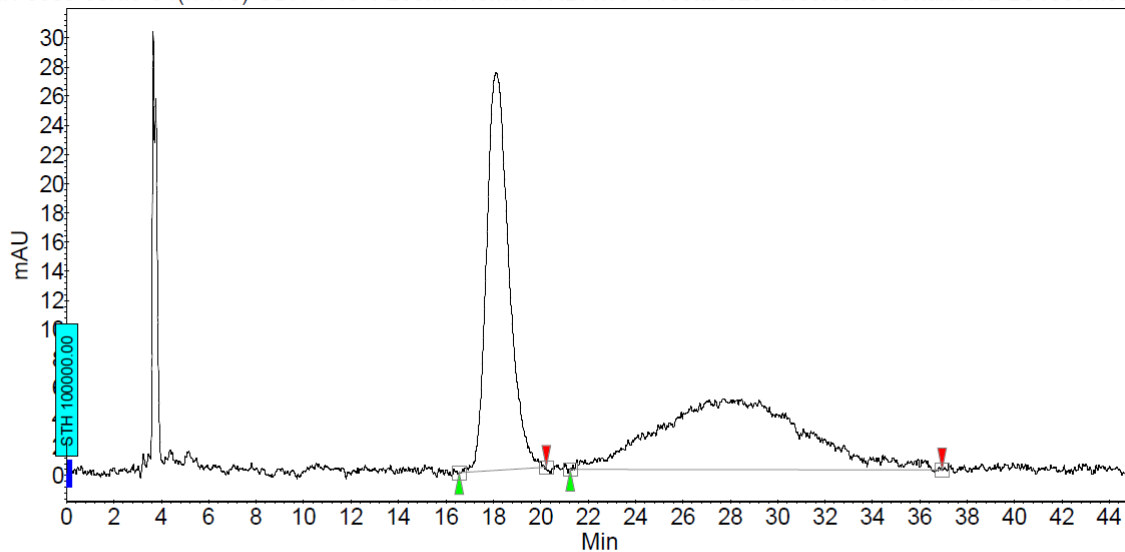

**Peak results :**

| Index | Name    | Time [Min] | Quantity [% Area] | Height [mAU] | Area [mAU.Min] | Area % [%] |
|-------|---------|------------|-------------------|--------------|----------------|------------|
| 1     | UNKNOWN | 18.12      | 46.14             | 27.3         | 29.7           | 46.135     |
| 2     | UNKNOWN | 27.73      | 53.86             | 4.9          | 34.7           | 53.865     |
| Total |         |            | 100.00            | 32.2         | 64.4           | 100.000    |

Racemic standard

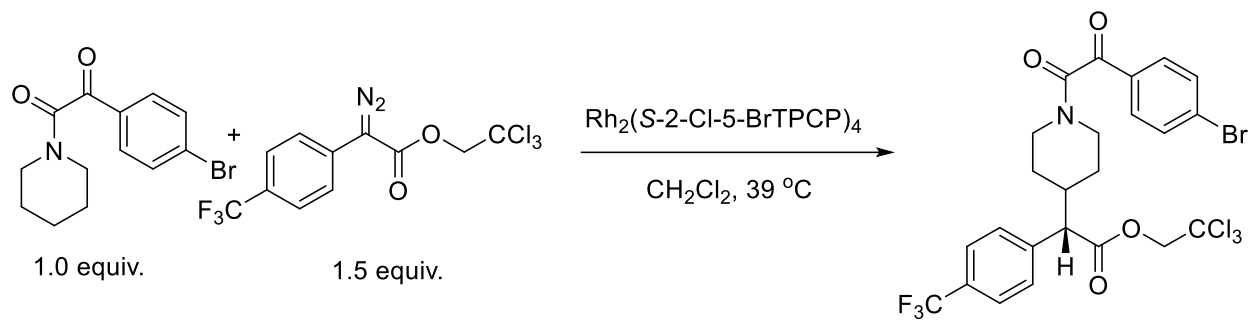

(Scheme 4, **13f**)

WL-ELN-0009-50chiral-C4(f3846)-ODH-1-10%-230nm-45min-20.DATA - Prostar 325 Absorbance Channel 2 LC1006M831

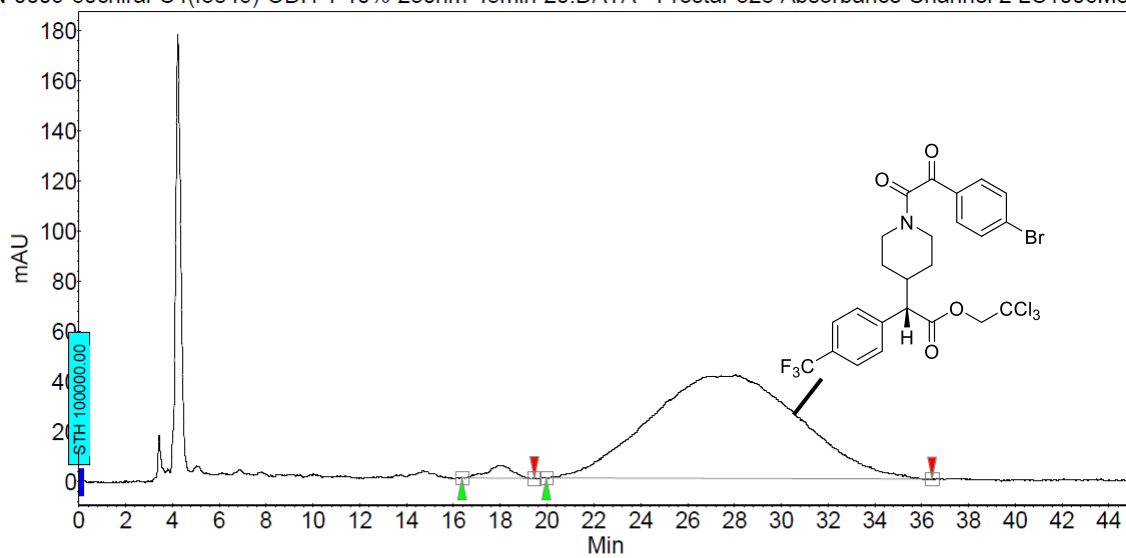

**Peak results :**

| Index | Name    | Time [Min] | Quantity [% Area] | Height [mAU] | Area [mAU.Min] | Area % [%] |
|-------|---------|------------|-------------------|--------------|----------------|------------|
| 1     | UNKNOWN | 18.09      | 2.04              | 5.2          | 6.3            | 2.039      |
| 2     | UNKNOWN | 28.06      | 97.96             | 41.2         | 304.7          | 97.961     |
| Total |         |            | 100.00            | 46.5         | 311.1          | 100.000    |

→ 96% ee



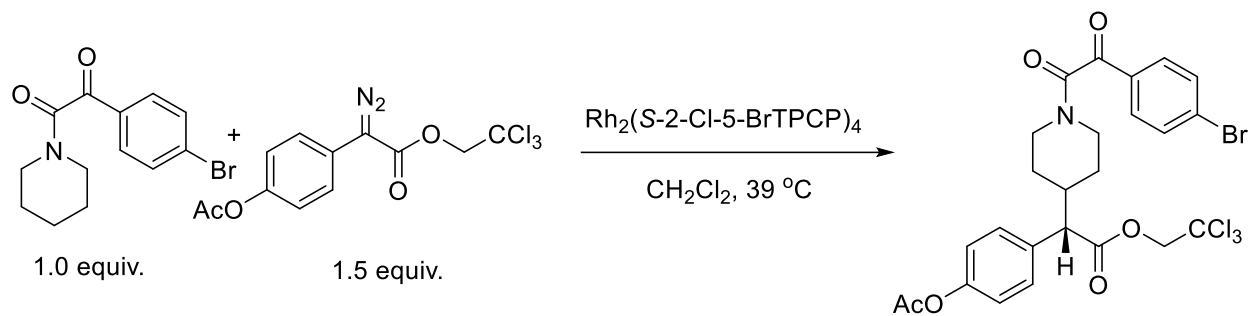

(Scheme 4, **13g**)

WL-ELN-0009-60-ODH-1-15%-230nm-80min-68.DATA - Prostar 325 Absorbance Channel 1 LC1006M831

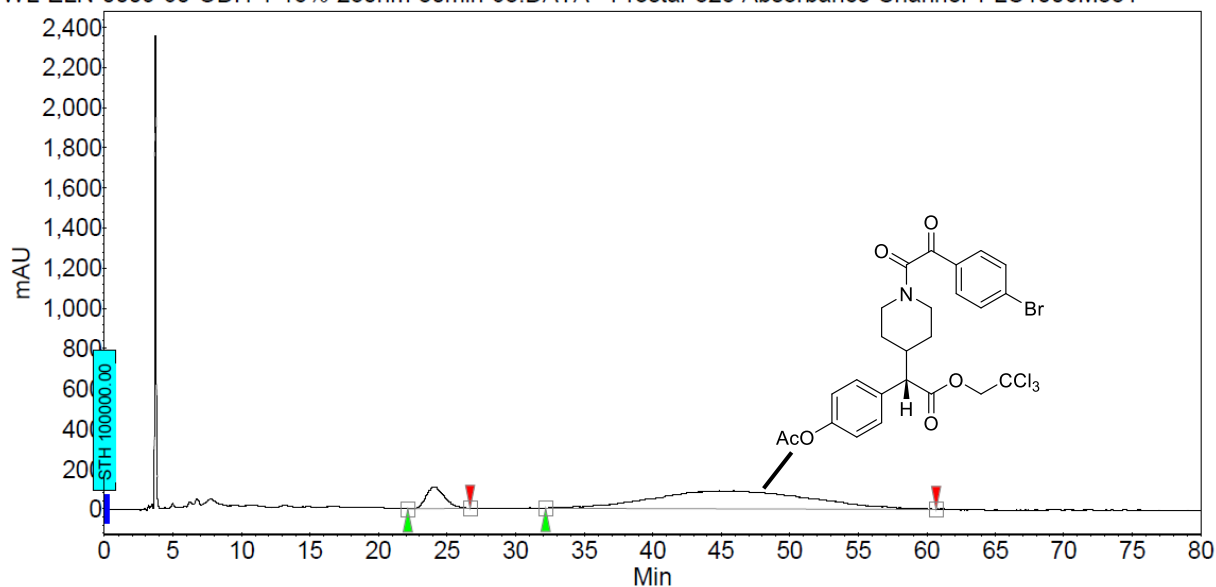

**Peak results :**

| Index | Name    | Time [Min] | Quantity [% Area] | Height [mAU] | Area [mAU.Min] | Area % [%] |
|-------|---------|------------|-------------------|--------------|----------------|------------|
| 1     | UNKNOWN | 23.99      | 12.50             | 107.4        | 167.5          | 12.499     |
| 2     | UNKNOWN | 45.95      | 87.50             | 89.9         | 1172.7         | 87.501     |
| Total |         |            | 100.00            | 197.3        | 1340.2         | 100.000    |

→ 75% ee



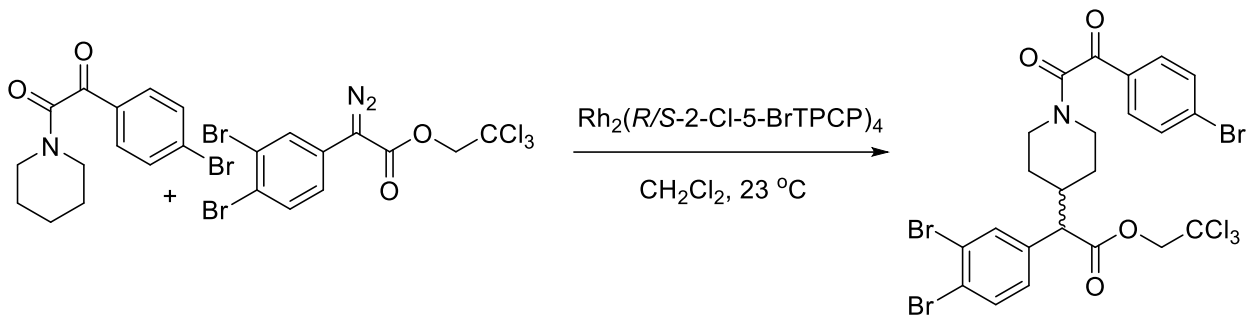

WL-ELN-0009-51rac-C4(f4445)-newRRW-1-20%-230nm-100min-23.DATA - Prostar 325 Absorbance Channel 2 LC1006M831

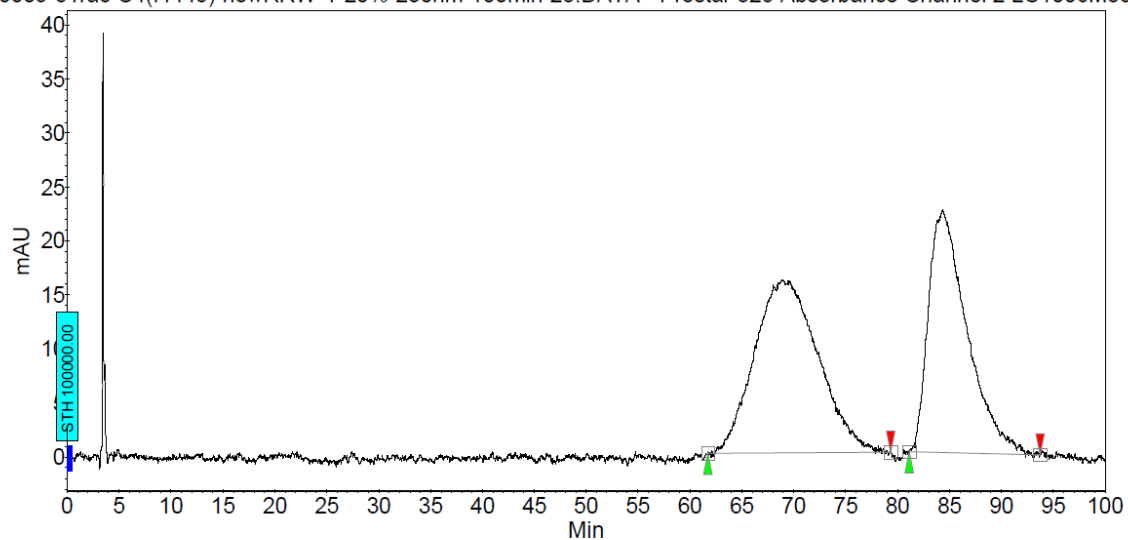

**Peak results :**

| Index | Name    | Time [Min] | Quantity [% Area] | Height [mAU] | Area [mAU.Min] | Area % [%] |
|-------|---------|------------|-------------------|--------------|----------------|------------|
| 1     | UNKNOWN | 68.88      | 54.19             | 16.0         | 114.1          | 54.189     |
| 2     | UNKNOWN | 84.32      | 45.81             | 22.4         | 96.5           | 45.811     |
| Total |         |            | 100.00            | 38.5         | 210.6          | 100.000    |

Racemic standard

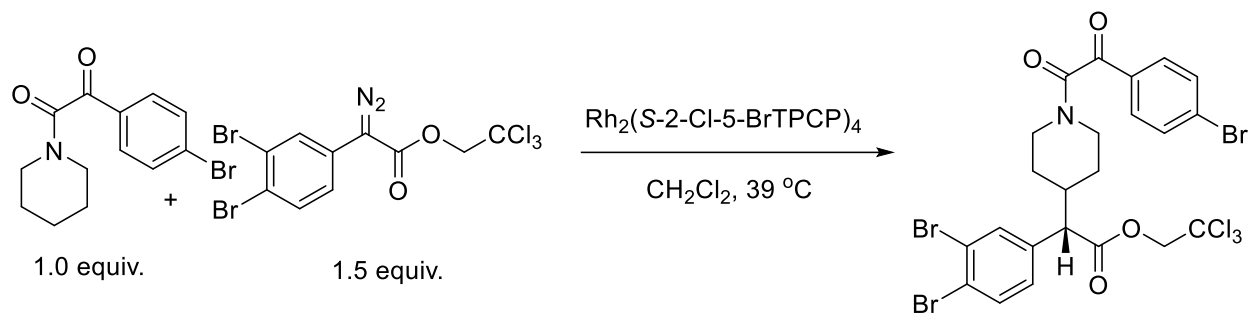

(Scheme 4, **13h**)

VL-ELN-0009-51chiral-C4(f5568)-newRRW-1-20%-230nm-100min-26.DATA - Prostar 325 Absorbance Channel 2 LC1006M831

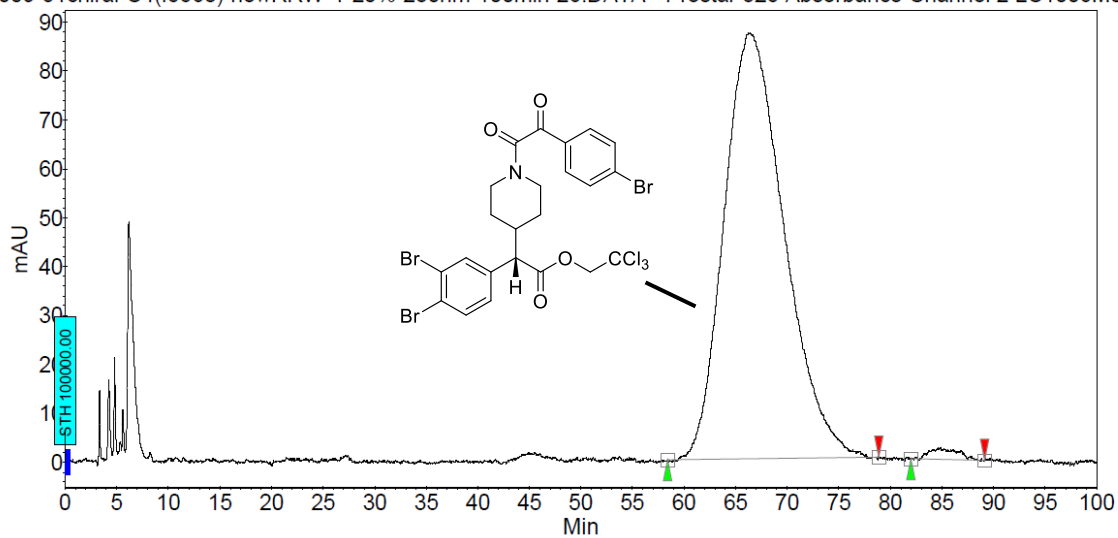

**Peak results :**

| Index | Name    | Time [Min] | Quantity [% Area] | Height [mAU] | Area [mAU.Min] | Area % [%] |
|-------|---------|------------|-------------------|--------------|----------------|------------|
| 1     | UNKNOWN | 66.36      | 98.76             | 87.2         | 589.1          | 98.760     |
| 2     | UNKNOWN | 84.85      | 1.24              | 2.6          | 7.4            | 1.240      |
| Total |         |            | 100.00            | 89.8         | 596.5          | 100.000    |

→ 98% ee

## 10. X-Ray Crystallographic Data of the Products for Absolute Stereochemistry

### 10.1. X-Ray Crystallographic Data for 6a

#### Crystal Data and Experimental

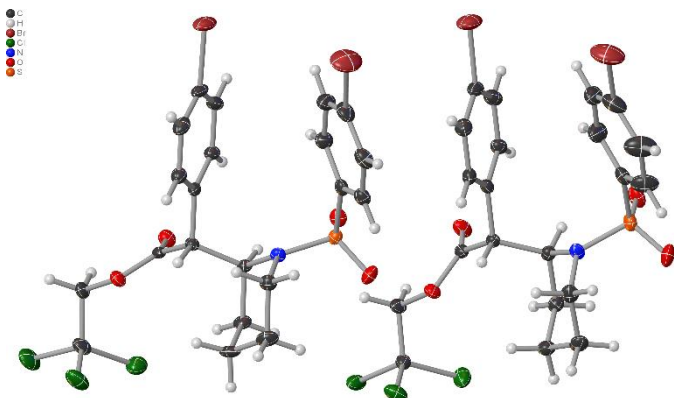

**Experimental.** Single colourless needle-shaped crystals of **WL-ELN09-38R-d1** were recrystallised from DCM by slow evaporation. A suitable crystal  $0.49 \times 0.10 \times 0.05$  mm<sup>3</sup> was selected and mounted on a loop with paratone oil on an XtaLAB Synergy, Dualflex, HyPix diffractometer. The crystal was kept at a steady  $T = 111.4(2)$  K during data collection. The structure was solved with the **ShelXT** (Sheldrick, 2015) structure solution program using the Intrinsic Phasing solution method and by using **Olex2** (Dolomanov et al., 2009) as the graphical interface. The model was refined with version 2018/3 of **ShelXL** (Sheldrick, 2015) using Least Squares minimisation.

**Crystal Data.** C<sub>21</sub>H<sub>20</sub>Br<sub>2</sub>Cl<sub>3</sub>NO<sub>4</sub>S,  $M_r = 648.61$ , orthorhombic,  $P2_12_12_1$  (No. 19),  $a = 6.15074(9)$  Å,  $b = 26.3980(4)$  Å,  $c = 30.1139(5)$  Å,  $a = b = c = 90^\circ$ ,  $V = 4889.51(13)$  Å<sup>3</sup>,  $T = 111.4(2)$  K,  $Z = 8$ ,  $Z' = 2$ ,  $m(\text{CuK}\alpha) = 8.276$  mm<sup>-1</sup>, 53908 reflections measured, 9424 unique ( $R_{int} = 0.0555$ ) which were used in all calculations. The final  $wR_2$  was 0.0645 (all data) and  $R_1$  was 0.0262 ( $I > 2\sigma(I)$ ).

| Compound                          | WL-ELN09-38R-d1                                                                   |
|-----------------------------------|-----------------------------------------------------------------------------------|
| Formula                           | C <sub>21</sub> H <sub>20</sub> Br <sub>2</sub> Cl <sub>3</sub> NO <sub>4</sub> S |
| $D_{calc.}/\text{g cm}^{-3}$      | 1.762                                                                             |
| $m/\text{mm}^{-1}$                | 8.276                                                                             |
| Formula Weight                    | 648.61                                                                            |
| Colour                            | colourless                                                                        |
| Shape                             | needle                                                                            |
| Size/mm <sup>3</sup>              | $0.49 \times 0.10 \times 0.05$                                                    |
| $T/\text{K}$                      | 111.4(2)                                                                          |
| Crystal System                    | orthorhombic                                                                      |
| Flack Parameter                   | -0.003(6)                                                                         |
| Hooft Parameter                   | -0.007(6)                                                                         |
| Space Group                       | $P2_12_12_1$                                                                      |
| $a/\text{Å}$                      | 6.15074(9)                                                                        |
| $b/\text{Å}$                      | 26.3980(4)                                                                        |
| $c/\text{Å}$                      | 30.1139(5)                                                                        |
| $a^\circ$                         | 90                                                                                |
| $b^\circ$                         | 90                                                                                |
| $g^\circ$                         | 90                                                                                |
| $V/\text{Å}^3$                    | 4889.51(13)                                                                       |
| $Z$                               | 8                                                                                 |
| $Z'$                              | 2                                                                                 |
| Wavelength/Å                      | 1.54184                                                                           |
| Radiation type                    | CuK $\alpha$                                                                      |
| $Q_{min}^\circ$                   | 2.935                                                                             |
| $Q_{max}^\circ$                   | 72.944                                                                            |
| Measured Refl.                    | 53908                                                                             |
| Independent Refl.                 | 9424                                                                              |
| Reflections with $I > 2\sigma(I)$ | 9037                                                                              |
| $R_{int}$                         | 0.0555                                                                            |
| Parameters                        | 577                                                                               |
| Restraints                        | 84                                                                                |
| Largest Peak                      | 0.650                                                                             |
| Deepest Hole                      | -0.502                                                                            |
| GooF                              | 1.021                                                                             |
| $wR_2$ (all data)                 | 0.0645                                                                            |
| $wR_2$                            | 0.0633                                                                            |
| $R_1$ (all data)                  | 0.0281                                                                            |
| $R_1$                             | 0.0262                                                                            |

## Structure Quality Indicators

|                     |            |       |            |      |          |       |                         |       |       |         |
|---------------------|------------|-------|------------|------|----------|-------|-------------------------|-------|-------|---------|
| <b>Reflections:</b> | d min (Cu) | 0.81  | $I/\sigma$ | 29.6 | Rint     | 5.55% | complete<br>100% (IUCr) | 100%  |       |         |
| <b>Refinement:</b>  | Shift      | 0.001 | Max Peak   | 0.7  | Min Peak | -0.5  | Goof                    | 1.021 | Flack | .003(6) |

A colourless needle-shaped crystal with dimensions  $0.49 \times 0.10 \times 0.05 \text{ mm}^3$  was mounted on a loop with paratone oil. Data were collected using an XtaLAB Synergy, Dualflex, HyPix diffractometer equipped with an Oxford Cryosystems low-temperature device operating at  $T = 111.4(2) \text{ K}$ .

Data were measured using  $\omega$  scans using  $\text{CuK}\alpha$  radiation. The total number of runs and images was based on the strategy calculation from the program **CrysAlisPro** (Rigaku, V1.171.40.37a, 2019). The maximum resolution that was achieved was  $Q = 72.944^\circ$  ( $0.81 \text{ \AA}$ ).

The diffraction pattern was indexed and the total number of runs and images was based on the strategy calculation from the program **CrysAlisPro** (Rigaku, V1.171.40.37a, 2019) and the unit cell was refined using **CrysAlisPro** (Rigaku, V1.171.40.37a, 2019) on 38372 reflections, 71% of the observed reflections.

Data reduction, scaling and absorption corrections were performed using **CrysAlisPro** (Rigaku, V1.171.40.37a, 2019). The final completeness is 99.90 % out to  $72.944^\circ$  in  $Q$ . A numerical absorption correction based on a Gaussian integration over a multifaceted crystal model was performed using **CrysAlisPro** (Rigaku, V1.171.40.37a, 2019). An empirical absorption correction using spherical harmonics as implemented in SCALE3 ABSPACK was also applied. The absorption coefficient  $m$  of this material is  $8.276 \text{ mm}^{-1}$  at this wavelength ( $\lambda = 1.542 \text{ \AA}$ ) and the minimum and maximum transmissions are 0.687 and 1.000.

The structure was solved and the space group  $P2_12_12_1$  (# 19) determined by the **ShelXT** (Sheldrick, 2015) structure solution program using Intrinsic Phasing and refined by Least Squares using version 2018/3 of **ShelXL** (Sheldrick, 2015). All non-hydrogen atoms were refined anisotropically. Hydrogen atom positions were calculated geometrically and refined using the riding model.

The value of  $Z'$  is 2. This means that there are two independent molecules in the asymmetric unit.

The Flack parameter was refined to  $-0.003(6)$ . Determination of absolute structure using Bayesian statistics on Bijvoet differences using the Olex2 results in  $-0.007(6)$ . Note: The Flack parameter is used to determine chirality of the crystal studied, the value should be near 0, a value of 1 means that the stereochemistry is wrong and the model should be inverted. A value of 0.5 means that the crystal consists of a racemic mixture of the two enantiomers.

## Images of the Crystal on the Diffractometer

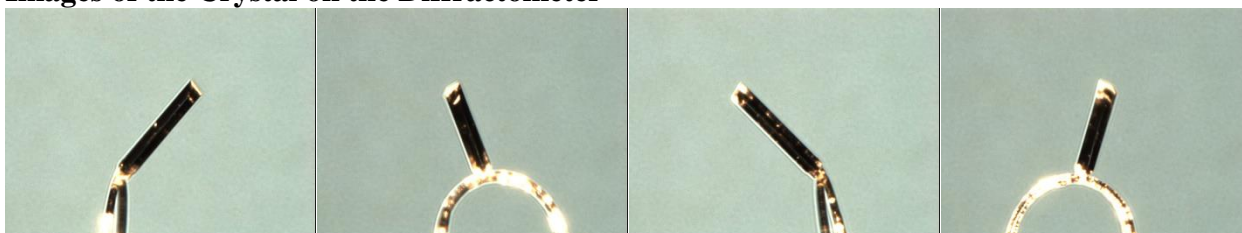

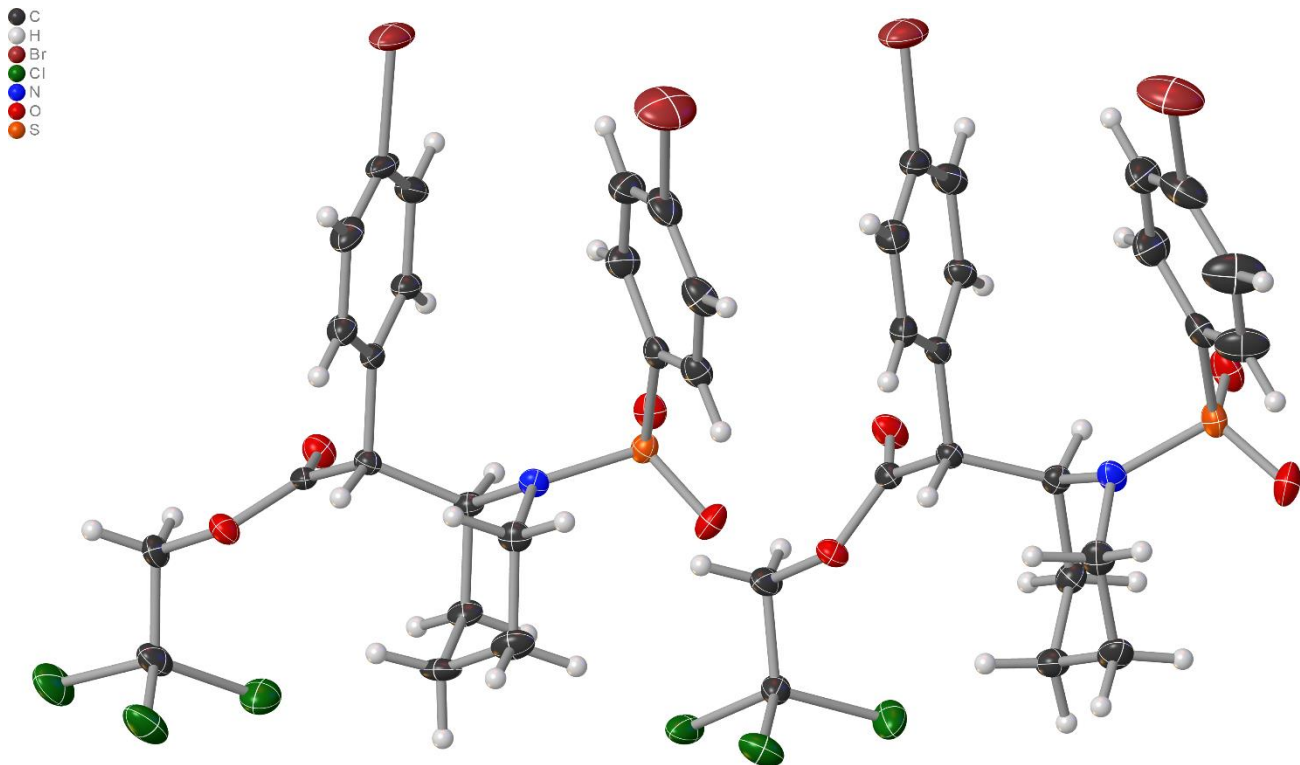

**Figure 1:** Plot of the asymmetric unit. There are two independent molecules in the asymmetric unit with the same chirality.

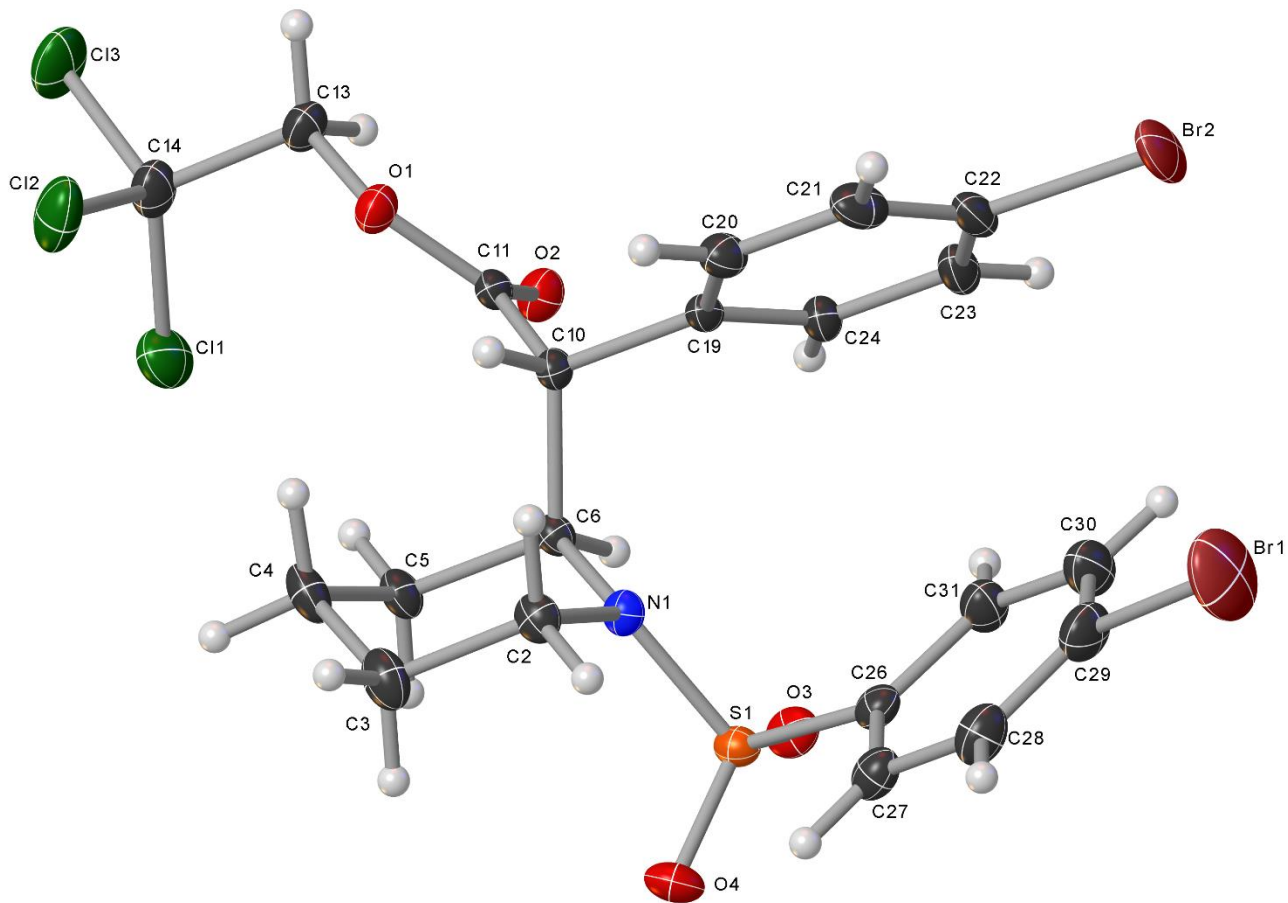

Figure 2: Plot of one of the two independent molecules in the asymmetric unit.

### Data Plots: Diffraction Data

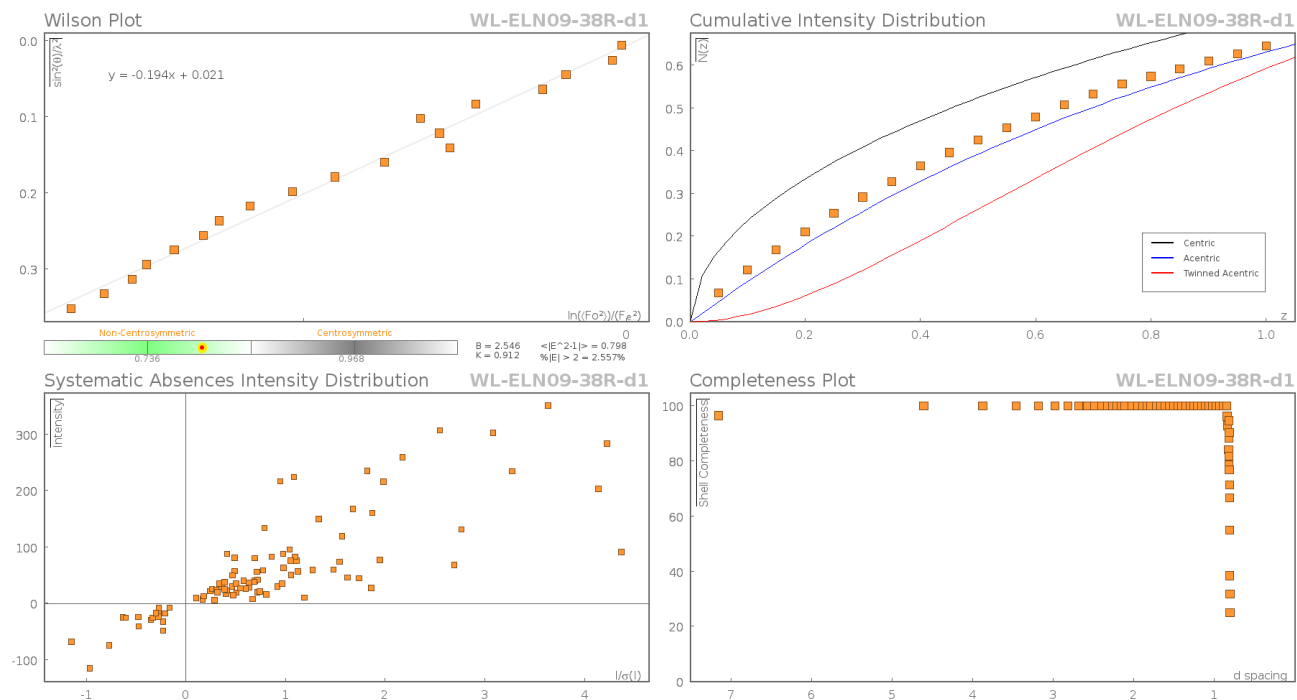

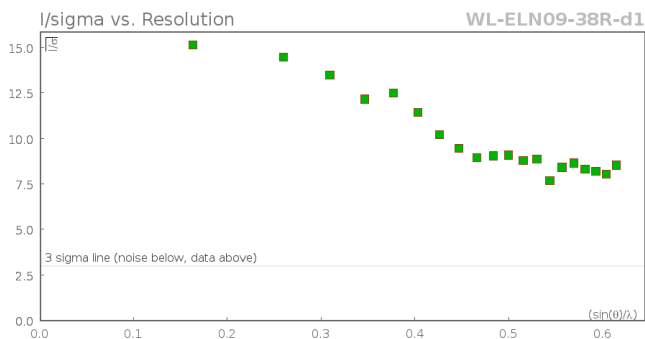

## Data Plots: Refinement and Data

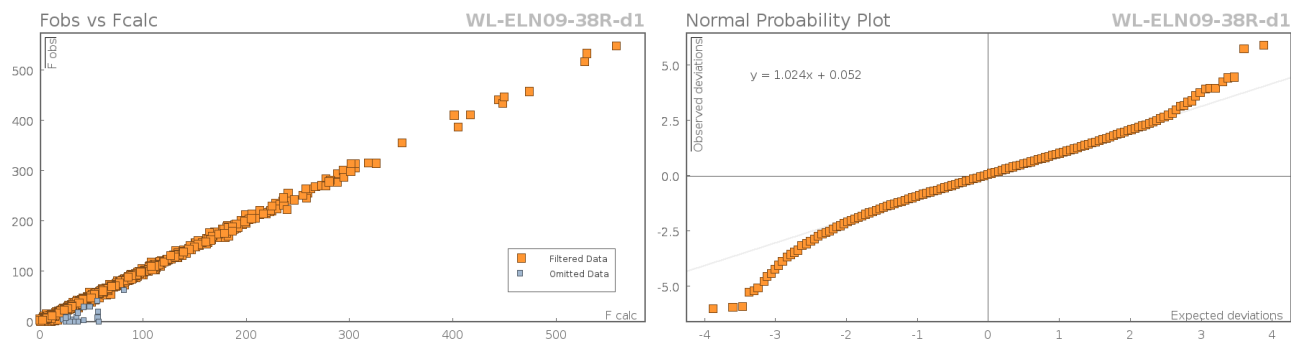

## Reflection Statistics

|                                     |                                                 |                                |                |
|-------------------------------------|-------------------------------------------------|--------------------------------|----------------|
| Total reflections (after filtering) | 54043                                           | Unique reflections             | 9424           |
| Completeness                        | 0.963                                           | Mean I/s                       | 22.96          |
| hkl <sub>max</sub> collected        | (7, 32, 33)                                     | hkl <sub>min</sub> collected   | (-7, -32, -37) |
| hkl <sub>max</sub> used             | (7, 32, 37)                                     | hkl <sub>min</sub> used        | (-7, 0, 0)     |
| Lim d <sub>max</sub> collected      | 100.0                                           | Lim d <sub>min</sub> collected | 0.77           |
| d <sub>max</sub> used               | 15.06                                           | d <sub>min</sub> used          | 0.81           |
| Friedel pairs                       | 8951                                            | Friedel pairs merged           | 0              |
| Inconsistent equivalents            | 25                                              | R <sub>int</sub>               | 0.0555         |
| R <sub>sigma</sub>                  | 0.0338                                          | Intensity transformed          | 0              |
| Omitted reflections                 | 0                                               | Omitted by user (OMIT hkl)     | 27             |
| Multiplicity                        | (12250, 7439, 3904, 1560, 827, 450, 211, 78, 3) | Maximum multiplicity           | 18             |
| Removed systematic absences         | 108                                             | Filtered off (Shel/OMIT)       | 0              |

**Table 1:** Fractional Atomic Coordinates ( $\times 10^4$ ) and Equivalent Isotropic Displacement Parameters ( $\text{\AA}^2 \times 10^3$ ) for **WL-ELN09-38R-d1**.  $U_{eq}$  is defined as 1/3 of the trace of the orthogonalised  $U_{ij}$ .

| Atom  | x          | y          | z          | $U_{eq}$  |
|-------|------------|------------|------------|-----------|
| Br1_1 | 9399.0(11) | 6623.9(2)  | 5923.8(2)  | 57.82(16) |
| Br2_1 | 4129.0(9)  | 6237.7(2)  | 7147.5(2)  | 39.32(12) |
| Cl1_1 | 401.7(18)  | 2394.2(4)  | 6689.3(3)  | 34.1(2)   |
| Cl2_1 | 4311.5(18) | 2290.6(4)  | 7212.2(4)  | 38.4(2)   |
| Cl3_1 | 103.5(19)  | 2097.7(4)  | 7609.6(4)  | 40.6(3)   |
| S1_1  | 4544.3(13) | 4550.5(3)  | 5437.5(2)  | 17.21(16) |
| O1_1  | 2811(4)    | 3340.6(9)  | 7132.6(8)  | 20.7(5)   |
| O2_1  | 27(4)      | 3735.4(10) | 6789.3(8)  | 22.9(5)   |
| O3_1  | 2229(4)    | 4617.1(10) | 5431.8(8)  | 22.3(5)   |
| O4_1  | 5601(4)    | 4342.2(10) | 5053.1(7)  | 24.0(5)   |
| N1_1  | 5131(4)    | 4224.0(11) | 5879.5(9)  | 16.4(5)   |
| C2_1  | 7405(5)    | 4047.9(14) | 5918.7(12) | 19.4(7)   |
| C3_1  | 7617(6)    | 3498.0(15) | 5770.1(14) | 26.3(7)   |
| C4_1  | 6049(6)    | 3160.0(14) | 6025.6(13) | 25.0(7)   |

| Atom  | x          | y          | z          | $U_{eq}$  |
|-------|------------|------------|------------|-----------|
| C5_1  | 3715(6)    | 3354.4(13) | 5966.8(12) | 20.0(6)   |
| C6_1  | 3485(5)    | 3910.0(12) | 6107.5(10) | 15.0(5)   |
| C10_1 | 3747(6)    | 3977.3(12) | 6617.8(10) | 16.1(5)   |
| C11_1 | 1944(6)    | 3682.4(13) | 6846.4(11) | 16.6(5)   |
| C13_1 | 1339(6)    | 3026.9(14) | 7377.8(12) | 23.2(7)   |
| C14_1 | 1552(7)    | 2477.7(14) | 7225.5(13) | 26.8(8)   |
| C19_1 | 3736(6)    | 4531.7(12) | 6754.1(10) | 16.1(6)   |
| C20_1 | 5603(6)    | 4726.2(14) | 6953.7(11) | 21.5(7)   |
| C21_1 | 5702(7)    | 5234.4(14) | 7075.1(11) | 26.7(8)   |
| C22_1 | 3928(7)    | 5540.5(14) | 6994.7(11) | 24.4(7)   |
| C23_1 | 2042(7)    | 5356.2(14) | 6802.3(12) | 24.7(7)   |
| C24_1 | 1961(6)    | 4845.9(13) | 6681.9(11) | 19.1(6)   |
| C26_1 | 5811(6)    | 5138.4(13) | 5545.0(10) | 18.8(6)   |
| C27_1 | 7877(6)    | 5230.1(14) | 5373.7(12) | 22.4(7)   |
| C28_1 | 8925(6)    | 5681.4(15) | 5484.8(13) | 27.9(7)   |
| C29_1 | 7895(7)    | 6025.1(15) | 5758.4(13) | 29.9(7)   |
| C30_1 | 5804(7)    | 5941.1(15) | 5918.8(13) | 30.8(8)   |
| C31_1 | 4773(6)    | 5492.6(14) | 5812.3(12) | 25.0(7)   |
| Br1_2 | 9323.2(10) | 7516.7(2)  | 3726.4(2)  | 59.28(16) |
| Br2_2 | 3339.0(9)  | 7048.7(2)  | 4897.6(2)  | 42.07(13) |
| Cl1_2 | -285.1(18) | 3269.3(4)  | 3886.9(3)  | 32.9(2)   |
| Cl2_2 | 3408.3(16) | 3118.6(3)  | 4461.5(3)  | 31.4(2)   |
| Cl3_2 | -895.4(17) | 2846.6(3)  | 4760.9(3)  | 29.6(2)   |
| S1_2  | 4047.4(15) | 5605.7(3)  | 2973.3(3)  | 21.13(18) |
| O1_2  | 1707(4)    | 4153.0(9)  | 4414.7(8)  | 19.5(5)   |
| O2_2  | -984(4)    | 4717.8(10) | 4300.2(8)  | 24.8(5)   |
| O3_2  | 1801(4)    | 5749.2(11) | 2955.3(9)  | 29.2(6)   |
| O4_2  | 5151(5)    | 5457.9(11) | 2575.8(8)  | 29.5(6)   |
| N1_2  | 4278(5)    | 5159.9(11) | 3342.0(9)  | 19.2(6)   |
| C2_2  | 6220(6)    | 4827.8(14) | 3313.8(12) | 22.8(7)   |
| C3_2  | 5676(6)    | 4327.6(14) | 3085.1(12) | 25.2(8)   |
| C4_2  | 3784(6)    | 4068.9(14) | 3319.2(12) | 22.7(7)   |
| C5_2  | 1817(6)    | 4423.3(14) | 3333.5(11) | 20.2(7)   |
| C6_2  | 2330(5)    | 4936.3(13) | 3550.3(11) | 17.1(7)   |
| C10_2 | 2697(5)    | 4908.7(13) | 4061.4(11) | 15.2(7)   |
| C11_2 | 894(6)     | 4597.2(13) | 4270.5(10) | 17.4(7)   |
| C13_2 | 283(6)     | 3812.3(13) | 4640.8(12) | 23.0(8)   |
| C14_2 | 621(6)     | 3289.5(13) | 4443.8(11) | 20.6(7)   |
| C19_2 | 2784(6)    | 5435.2(13) | 4269.0(11) | 17.0(7)   |
| C20_2 | 4696(6)    | 5591.2(14) | 4477.1(11) | 20.3(7)   |
| C21_2 | 4859(7)    | 6069.0(14) | 4668.6(12) | 25.6(8)   |
| C22_2 | 3080(7)    | 6388.1(14) | 4650.0(12) | 25.3(8)   |
| C23_2 | 1162(6)    | 6244.7(14) | 4447.2(12) | 25.6(8)   |
| C24_2 | 1020(6)    | 5767.0(14) | 4256.6(11) | 20.8(7)   |
| C26_2 | 5503(6)    | 6128.7(14) | 3189.2(12) | 23.5(7)   |
| C27_2 | 7523(7)    | 6241.6(17) | 3015.7(17) | 37.4(10)  |
| C28_2 | 8624(7)    | 6660.9(19) | 3173.0(19) | 47.9(12)  |
| C29_2 | 7724(8)    | 6954.8(16) | 3503.2(16) | 38.1(10)  |
| C30_2 | 5690(9)    | 6848.9(15) | 3673.2(14) | 37.6(10)  |
| C31_2 | 4585(8)    | 6429.7(16) | 3514.1(13) | 36.2(10)  |

**Table 2:** Anisotropic Displacement Parameters ( $\times 10^4$ ) **WL-ELN09-38R-d1**. The anisotropic displacement factor exponent takes the form:  $-2p^2[h^2a^{*2} \times U_{11} + \dots + 2hka^* \times b^* \times U_{12}]$

| Atom  | $U_{11}$ | $U_{22}$  | $U_{33}$ | $U_{23}$   | $U_{13}$ | $U_{12}$ |
|-------|----------|-----------|----------|------------|----------|----------|
| Br1_1 | 64.3(4)  | 29.6(2)   | 79.5(4)  | -9.2(2)    | 7.9(3)   | -22.3(3) |
| Br2_1 | 62.3(3)  | 15.68(19) | 40.0(2)  | -10.61(16) | 11.8(2)  | -6.9(2)  |
| Cl1_1 | 44.0(6)  | 24.1(5)   | 34.2(5)  | -4.5(4)    | 1.5(4)   | -6.9(4)  |



| Atom  | $U_{11}$ | $U_{22}$ | $U_{33}$ | $U_{23}$   | $U_{13}$ | $U_{12}$  |
|-------|----------|----------|----------|------------|----------|-----------|
| Cl2_1 | 34.3(5)  | 28.5(5)  | 52.3(6)  | 13.2(4)    | 7.0(5)   | 10.7(4)   |
| Cl3_1 | 48.8(6)  | 26.2(5)  | 46.9(6)  | 14.7(4)    | 14.2(5)  | -4.6(4)   |
| S1_1  | 16.0(4)  | 20.5(4)  | 15.1(3)  | -1.1(3)    | -1.0(3)  | 0.8(3)    |
| O1_1  | 24.0(10) | 16.5(10) | 21.7(10) | 3.9(8)     | -0.1(8)  | -0.9(8)   |
| O2_1  | 22.2(8)  | 20.5(12) | 25.9(12) | 3.8(10)    | 0.3(7)   | -0.5(7)   |
| O3_1  | 16.4(12) | 27.2(13) | 23.3(12) | 2.0(10)    | -3.6(10) | 1.4(11)   |
| O4_1  | 23.9(12) | 32.2(14) | 16.0(11) | -5.9(10)   | 2.0(10)  | -0.3(12)  |
| N1_1  | 13.0(10) | 16.9(12) | 19.3(12) | 0.7(10)    | -0.6(8)  | 1.2(8)    |
| C2_1  | 13.7(11) | 21.1(13) | 23.5(16) | -2.0(11)   | -2.1(10) | 2.7(9)    |
| C3_1  | 20.7(14) | 22.6(13) | 35.6(17) | -6.3(11)   | -3.8(13) | 4.2(10)   |
| C4_1  | 22.9(12) | 18.5(14) | 33.4(17) | -9.7(12)   | -2.8(11) | 3.6(10)   |
| C5_1  | 21.0(13) | 15.7(11) | 23.4(16) | -5.6(10)   | -1.6(11) | -0.1(9)   |
| C6_1  | 13.9(11) | 14.7(11) | 16.4(10) | -2.6(8)    | -0.8(8)  | -0.1(9)   |
| C10_1 | 20.0(11) | 12.3(10) | 15.9(10) | -0.6(7)    | -0.8(8)  | 0.1(9)    |
| C11_1 | 22.3(8)  | 12.2(11) | 15.4(11) | -1.6(9)    | 1.0(7)   | -0.3(7)   |
| C13_1 | 27.8(14) | 18.5(12) | 23.2(14) | 5.3(10)    | 3.2(12)  | -0.4(10)  |
| C14_1 | 30.9(19) | 18.4(12) | 31.2(18) | 4.6(12)    | 6.3(15)  | 0.0(12)   |
| C19_1 | 22.4(13) | 12.4(10) | 13.6(13) | -0.3(9)    | 2.1(11)  | -1.0(9)   |
| C20_1 | 25.3(18) | 20.7(17) | 18.6(16) | -1.6(13)   | -0.8(14) | -2.1(15)  |
| C21_1 | 35(2)    | 24.8(19) | 20.2(17) | -6.2(14)   | -0.4(16) | -10.7(17) |
| C22_1 | 35.5(16) | 16.6(16) | 21.0(15) | -4.1(12)   | 9.1(12)  | -1.9(12)  |
| C23_1 | 35.0(16) | 14.2(11) | 24.8(16) | -1.6(10)   | 7.0(12)  | -0.7(10)  |
| C24_1 | 23.7(13) | 14.2(11) | 19.5(15) | -0.8(9)    | 1.0(11)  | 0.5(9)    |
| C26_1 | 18.4(12) | 20.6(14) | 17.3(13) | 4.3(11)    | -2.3(11) | 2.3(11)   |
| C27_1 | 18.7(13) | 23.6(14) | 24.9(17) | 6.1(12)    | -0.4(11) | 2.4(11)   |
| C28_1 | 24.2(16) | 25.6(14) | 33.8(17) | 7.9(12)    | -1.3(13) | -2.3(11)  |
| C29_1 | 36.5(16) | 21.6(15) | 31.5(18) | 7.0(13)    | 1.0(14)  | -5.8(12)  |
| C30_1 | 40.2(16) | 21.5(14) | 30.6(18) | 0.3(12)    | 7.4(14)  | -3.8(13)  |
| C31_1 | 27.8(16) | 20.9(13) | 26.5(16) | 1.4(12)    | 6.3(13)  | 0.1(11)   |
| Br1_2 | 56.1(3)  | 25.8(2)  | 96.0(4)  | -10.3(3)   | -12.4(3) | -7.1(3)   |
| Br2_2 | 59.3(3)  | 20.3(2)  | 46.6(3)  | -13.33(19) | 9.1(2)   | -5.4(2)   |
| Cl1_2 | 48.9(6)  | 26.6(5)  | 23.1(4)  | -2.1(3)    | -8.6(4)  | -9.1(4)   |
| Cl2_2 | 27.0(4)  | 20.0(4)  | 47.3(5)  | 3.4(4)     | -0.4(4)  | 3.6(4)    |
| Cl3_2 | 41.8(5)  | 15.7(4)  | 31.4(4)  | -1.5(3)    | 13.3(4)  | -5.2(4)   |
| S1_2  | 22.2(4)  | 24.1(4)  | 17.2(4)  | 5.3(3)     | -2.4(3)  | 0.9(4)    |
| O1_2  | 21.0(12) | 13.6(11) | 23.9(12) | 2.0(9)     | 0.3(10)  | -1.4(10)  |
| O2_2  | 19.3(13) | 22.5(13) | 32.6(13) | 6.1(10)    | 4.4(11)  | 2.6(11)   |
| O3_2  | 23.9(13) | 32.5(15) | 31.2(14) | 11.5(12)   | -5.3(11) | 5.4(12)   |
| O4_2  | 33.3(15) | 41.0(16) | 14.2(11) | 3.0(11)    | 1.7(11)  | -3.9(13)  |
| N1_2  | 16.6(14) | 20.8(14) | 20.1(13) | 3.7(11)    | 1.7(12)  | 4.8(13)   |
| C2_2  | 15.4(17) | 27.4(19) | 25.7(17) | 1.6(15)    | 1.0(14)  | 5.1(15)   |
| C3_2  | 22.6(17) | 27.6(19) | 25.5(17) | -2.8(14)   | 1.3(15)  | 10.8(16)  |
| C4_2  | 25.5(19) | 18.3(17) | 24.3(17) | -3.1(14)   | 0.0(14)  | 1.9(15)   |
| C5_2  | 19.1(17) | 22.8(18) | 18.7(16) | -2.3(14)   | -0.8(13) | -0.7(15)  |
| C6_2  | 14.6(15) | 18.9(17) | 17.7(16) | -0.2(13)   | 0.6(13)  | 1.9(14)   |
| C10_2 | 14.2(15) | 15.0(16) | 16.4(15) | 0.7(13)    | -0.3(12) | 1.2(13)   |
| C11_2 | 21.8(17) | 15.2(16) | 15.3(15) | -0.9(12)   | -1.8(13) | 0.1(15)   |
| C13_2 | 30(2)    | 14.6(16) | 24.3(17) | 1.6(14)    | 7.8(15)  | -1.8(15)  |
| C14_2 | 26.0(17) | 17.0(16) | 18.8(15) | 0.6(13)    | 0.8(14)  | -3.2(15)  |
| C19_2 | 20.3(17) | 13.9(16) | 16.9(15) | 2.4(13)    | 2.1(13)  | 0.7(14)   |
| C20_2 | 23.3(18) | 21.5(17) | 16.1(15) | 1.4(13)    | 0.2(14)  | -0.1(15)  |
| C21_2 | 31(2)    | 21.8(18) | 24.2(18) | -1.4(14)   | -3.3(15) | -3.8(16)  |
| C22_2 | 38(2)    | 16.0(17) | 21.5(17) | -1.5(14)   | 7.3(16)  | -2.8(16)  |
| C23_2 | 26.6(19) | 19.9(18) | 30.4(19) | 3.1(15)    | 8.8(15)  | 3.0(15)   |
| C24_2 | 19.9(17) | 19.2(17) | 23.3(16) | 0.9(13)    | 2.7(14)  | 2.0(15)   |
| C26_2 | 26.3(18) | 19.9(18) | 24.2(17) | 8.1(14)    | -2.7(15) | 0.6(16)   |
| C27_2 | 21.6(19) | 30(2)    | 60(3)    | -10(2)     | 1.1(19)  | 5.2(18)   |
| C28_2 | 22(2)    | 38(3)    | 83(4)    | -12(2)     | 6(2)     | -2(2)     |
| C29_2 | 40(2)    | 21(2)    | 53(3)    | 5.6(19)    | -9(2)    | 0.4(18)   |

| Atom  | $U_{11}$ | $U_{22}$ | $U_{33}$ | $U_{23}$ | $U_{13}$ | $U_{12}$ |
|-------|----------|----------|----------|----------|----------|----------|
| C30_2 | 61(3)    | 23.3(19) | 28.8(19) | 3.2(16)  | 9(2)     | -5(2)    |
| C31_2 | 50(3)    | 27(2)    | 31(2)    | 3.5(16)  | 13(2)    | -9(2)    |

**Table 3:** Bond Lengths in Å for **WL-ELN09-38R-d1**.

| Atom  | Atom  | Length/Å | Atom  | Atom  | Length/Å |
|-------|-------|----------|-------|-------|----------|
| Br1_1 | C29_1 | 1.898(4) | Br1_2 | C29_2 | 1.903(5) |
| Br2_1 | C22_1 | 1.901(4) | Br2_2 | C22_2 | 1.903(4) |
| Cl1_1 | C14_1 | 1.777(4) | Cl1_2 | C14_2 | 1.768(3) |
| Cl2_1 | C14_1 | 1.768(4) | Cl2_2 | C14_2 | 1.774(4) |
| Cl3_1 | C14_1 | 1.771(4) | Cl3_2 | C14_2 | 1.774(4) |
| S1_1  | O3_1  | 1.435(3) | S1_2  | O3_2  | 1.434(3) |
| S1_1  | O4_1  | 1.437(2) | S1_2  | O4_2  | 1.430(3) |
| S1_1  | N1_1  | 1.626(3) | S1_2  | N1_2  | 1.624(3) |
| S1_1  | C26_1 | 1.766(4) | S1_2  | C26_2 | 1.769(4) |
| O1_1  | C11_1 | 1.357(4) | O1_2  | C11_2 | 1.347(4) |
| O1_1  | C13_1 | 1.432(4) | O1_2  | C13_2 | 1.428(4) |
| O2_1  | C11_1 | 1.200(4) | O2_2  | C11_2 | 1.202(5) |
| N1_1  | C2_1  | 1.478(4) | N1_2  | C2_2  | 1.484(4) |
| N1_1  | C6_1  | 1.478(4) | N1_2  | C6_2  | 1.475(4) |
| C2_1  | C3_1  | 1.525(5) | C2_2  | C3_2  | 1.526(5) |
| C3_1  | C4_1  | 1.522(6) | C3_2  | C4_2  | 1.522(5) |
| C4_1  | C5_1  | 1.535(5) | C4_2  | C5_2  | 1.530(5) |
| C5_1  | C6_1  | 1.533(5) | C5_2  | C6_2  | 1.536(5) |
| C6_1  | C10_1 | 1.555(4) | C6_2  | C10_2 | 1.557(5) |
| C10_1 | C11_1 | 1.520(5) | C10_2 | C11_2 | 1.517(5) |
| C10_1 | C19_1 | 1.520(4) | C10_2 | C19_2 | 1.525(5) |
| C13_1 | C14_1 | 1.526(5) | C13_2 | C14_2 | 1.517(5) |
| C19_1 | C20_1 | 1.394(5) | C19_2 | C20_2 | 1.395(5) |
| C19_1 | C24_1 | 1.388(5) | C19_2 | C24_2 | 1.395(5) |
| C20_1 | C21_1 | 1.392(5) | C20_2 | C21_2 | 1.391(5) |
| C21_1 | C22_1 | 1.379(6) | C21_2 | C22_2 | 1.382(6) |
| C22_1 | C23_1 | 1.385(6) | C22_2 | C23_2 | 1.381(6) |
| C23_1 | C24_1 | 1.396(5) | C23_2 | C24_2 | 1.388(5) |
| C26_1 | C27_1 | 1.393(5) | C26_2 | C27_2 | 1.380(6) |
| C26_1 | C31_1 | 1.389(5) | C26_2 | C31_2 | 1.381(6) |
| C27_1 | C28_1 | 1.395(5) | C27_2 | C28_2 | 1.381(7) |
| C28_1 | C29_1 | 1.379(6) | C28_2 | C29_2 | 1.378(7) |
| C29_1 | C30_1 | 1.392(6) | C29_2 | C30_2 | 1.380(7) |
| C30_1 | C31_1 | 1.381(6) | C30_2 | C31_2 | 1.384(6) |

**Table 4:** Bond Angles in ° for **WL-ELN09-38R-d1**.

| Atom  | Atom | Atom  | Angle/°    | Atom  | Atom  | Atom  | Angle/°  |
|-------|------|-------|------------|-------|-------|-------|----------|
| O3_1  | S1_1 | O4_1  | 119.08(15) | C4_1  | C3_1  | C2_1  | 110.8(3) |
| O3_1  | S1_1 | N1_1  | 107.16(15) | C3_1  | C4_1  | C5_1  | 109.8(3) |
| O3_1  | S1_1 | C26_1 | 109.40(17) | C6_1  | C5_1  | C4_1  | 112.0(3) |
| O4_1  | S1_1 | N1_1  | 110.87(15) | N1_1  | C6_1  | C5_1  | 110.2(3) |
| O4_1  | S1_1 | C26_1 | 106.53(16) | N1_1  | C6_1  | C10_1 | 108.9(3) |
| N1_1  | S1_1 | C26_1 | 102.57(15) | C5_1  | C6_1  | C10_1 | 111.9(3) |
| C11_1 | O1_1 | C13_1 | 117.6(3)   | C11_1 | C10_1 | C6_1  | 108.3(3) |
| C2_1  | N1_1 | S1_1  | 116.2(2)   | C11_1 | C10_1 | C19_1 | 111.6(3) |
| C6_1  | N1_1 | S1_1  | 121.7(2)   | C19_1 | C10_1 | C6_1  | 112.1(3) |
| C6_1  | N1_1 | C2_1  | 115.8(3)   | O1_1  | C11_1 | C10_1 | 110.0(3) |
| N1_1  | C2_1 | C3_1  | 110.9(3)   | O2_1  | C11_1 | O1_1  | 123.7(3) |

| Atom  | Atom  | Atom  | Angle/°    |
|-------|-------|-------|------------|
| O2_1  | C11_1 | C10_1 | 126.3(3)   |
| O1_1  | C13_1 | C14_1 | 109.9(3)   |
| Cl2_1 | C14_1 | Cl1_1 | 109.1(2)   |
| Cl2_1 | C14_1 | Cl3_1 | 109.8(2)   |
| Cl3_1 | C14_1 | Cl1_1 | 108.8(2)   |
| C13_1 | C14_1 | Cl1_1 | 110.9(3)   |
| C13_1 | C14_1 | Cl2_1 | 110.8(3)   |
| C13_1 | C14_1 | Cl3_1 | 107.4(3)   |
| C20_1 | C19_1 | C10_1 | 117.9(3)   |
| C24_1 | C19_1 | C10_1 | 122.4(3)   |
| C24_1 | C19_1 | C20_1 | 119.7(3)   |
| C21_1 | C20_1 | C19_1 | 120.3(4)   |
| C22_1 | C21_1 | C20_1 | 118.9(4)   |
| C21_1 | C22_1 | Br2_1 | 118.2(3)   |
| C21_1 | C22_1 | C23_1 | 122.0(3)   |
| C23_1 | C22_1 | Br2_1 | 119.7(3)   |
| C22_1 | C23_1 | C24_1 | 118.5(4)   |
| C19_1 | C24_1 | C23_1 | 120.5(3)   |
| C27_1 | C26_1 | S1_1  | 119.2(3)   |
| C31_1 | C26_1 | S1_1  | 119.7(3)   |
| C31_1 | C26_1 | C27_1 | 121.1(3)   |
| C26_1 | C27_1 | C28_1 | 118.8(4)   |
| C29_1 | C28_1 | C27_1 | 119.5(4)   |
| C28_1 | C29_1 | Br1_1 | 118.7(3)   |
| C28_1 | C29_1 | C30_1 | 121.8(4)   |
| C30_1 | C29_1 | Br1_1 | 119.5(3)   |
| C31_1 | C30_1 | C29_1 | 118.7(4)   |
| C30_1 | C31_1 | C26_1 | 120.1(4)   |
| O3_2  | S1_2  | N1_2  | 107.54(16) |
| O3_2  | S1_2  | C26_2 | 107.18(18) |
| O4_2  | S1_2  | O3_2  | 119.85(17) |
| O4_2  | S1_2  | N1_2  | 109.44(16) |
| O4_2  | S1_2  | C26_2 | 106.29(18) |
| N1_2  | S1_2  | C26_2 | 105.67(16) |
| C11_2 | O1_2  | C13_2 | 118.3(3)   |
| C2_2  | N1_2  | S1_2  | 117.3(2)   |
| C6_2  | N1_2  | S1_2  | 120.6(2)   |
| C6_2  | N1_2  | C2_2  | 116.2(3)   |
| N1_2  | C2_2  | C3_2  | 111.1(3)   |
| C4_2  | C3_2  | C2_2  | 110.3(3)   |
| C3_2  | C4_2  | C5_2  | 110.1(3)   |
| C4_2  | C5_2  | C6_2  | 112.9(3)   |
| N1_2  | C6_2  | C5_2  | 109.8(3)   |
| N1_2  | C6_2  | C10_2 | 108.7(3)   |
| C5_2  | C6_2  | C10_2 | 114.1(3)   |
| C11_2 | C10_2 | C6_2  | 109.3(3)   |
| C11_2 | C10_2 | C19_2 | 110.5(3)   |
| C19_2 | C10_2 | C6_2  | 111.6(3)   |
| O1_2  | C11_2 | C10_2 | 109.6(3)   |
| O2_2  | C11_2 | O1_2  | 124.3(3)   |
| O2_2  | C11_2 | C10_2 | 126.2(3)   |
| O1_2  | C13_2 | C14_2 | 107.6(3)   |
| Cl1_2 | C14_2 | Cl2_2 | 109.00(19) |
| Cl1_2 | C14_2 | Cl3_2 | 108.98(19) |
| Cl2_2 | C14_2 | Cl3_2 | 108.92(19) |
| C13_2 | C14_2 | Cl1_2 | 110.8(2)   |
| C13_2 | C14_2 | Cl2_2 | 110.6(3)   |
| C13_2 | C14_2 | Cl3_2 | 108.5(2)   |
| C20_2 | C19_2 | C10_2 | 118.9(3)   |

| Atom  | Atom  | Atom  | Angle/°  |
|-------|-------|-------|----------|
| C24_2 | C19_2 | C10_2 | 122.3(3) |
| C24_2 | C19_2 | C20_2 | 118.9(3) |
| C21_2 | C20_2 | C19_2 | 121.0(3) |
| C22_2 | C21_2 | C20_2 | 118.6(4) |
| C21_2 | C22_2 | Br2_2 | 118.4(3) |
| C23_2 | C22_2 | Br2_2 | 119.7(3) |
| C23_2 | C22_2 | C21_2 | 121.8(3) |
| C22_2 | C23_2 | C24_2 | 119.0(4) |
| C23_2 | C24_2 | C19_2 | 120.7(3) |
| C27_2 | C26_2 | S1_2  | 119.0(3) |
| C27_2 | C26_2 | C31_2 | 120.8(4) |
| C31_2 | C26_2 | S1_2  | 120.1(3) |
| C26_2 | C27_2 | C28_2 | 119.0(4) |
| C29_2 | C28_2 | C27_2 | 120.1(4) |
| C28_2 | C29_2 | Br1_2 | 119.1(4) |
| C28_2 | C29_2 | C30_2 | 121.2(4) |
| C30_2 | C29_2 | Br1_2 | 119.7(4) |
| C29_2 | C30_2 | C31_2 | 118.6(4) |
| C26_2 | C31_2 | C30_2 | 120.3(4) |

**Table 5:** Hydrogen Fractional Atomic Coordinates ( $\times 10^4$ ) and Equivalent Isotropic Displacement Parameters ( $\text{\AA}^2 \times 10^3$ ) for **WL-ELN09-38R-d1**.  $U_{eq}$  is defined as 1/3 of the trace of the orthogonalised  $U_{ij}$ .

| Atom   | x        | y       | z       | $U_{eq}$ |
|--------|----------|---------|---------|----------|
| H2A_1  | 7878.12  | 4078.71 | 6224.81 | 23       |
| H2B_1  | 8337.85  | 4259.8  | 5737.18 | 23       |
| H3A_1  | 7311.68  | 3473.79 | 5454.82 | 32       |
| H3B_1  | 9095.49  | 3382.98 | 5819.17 | 32       |
| H4A_1  | 6429.89  | 3160.13 | 6338.15 | 30       |
| H4B_1  | 6154.56  | 2815    | 5916.72 | 30       |
| H5A_1  | 3294.02  | 3320.28 | 5657.86 | 24       |
| H5B_1  | 2737.01  | 3147.89 | 6143.19 | 24       |
| H6_1   | 2037.43  | 4029.66 | 6021.31 | 18       |
| H10_1  | 5143.27  | 3829.74 | 6706.03 | 19       |
| H13A_1 | -140.72  | 3142.74 | 7331.61 | 28       |
| H13B_1 | 1661.75  | 3050.47 | 7692.42 | 28       |
| H20_1  | 6786.92  | 4515.45 | 7005.93 | 26       |
| H21_1  | 6944.63  | 5365.43 | 7208.35 | 32       |
| H23_1  | 855.32   | 5567.72 | 6754.52 | 30       |
| H24_1  | 708.01   | 4715.39 | 6552.3  | 23       |
| H27_1  | 8545.69  | 4994.98 | 5188.66 | 27       |
| H28_1  | 10307.19 | 5750    | 5375.22 | 33       |
| H30_1  | 5113.99  | 6182.34 | 6094.33 | 37       |
| H31_1  | 3383.33  | 5427.67 | 5919.62 | 30       |
| H2A_2  | 6762.05  | 4760.48 | 3610.43 | 27       |
| H2B_2  | 7355.69  | 4999.92 | 3148.97 | 27       |
| H3A_2  | 5296.12  | 4390.63 | 2777.42 | 30       |
| H3B_2  | 6938.15  | 4107.47 | 3090.44 | 30       |
| H4A_2  | 4207.67  | 3978.7  | 3619.28 | 27       |
| H4B_2  | 3403.32  | 3760.28 | 3162.62 | 27       |
| H5A_2  | 654.73   | 4260.34 | 3497.75 | 24       |
| H5B_2  | 1305.04  | 4480.6  | 3033    | 24       |
| H6_2   | 1100.42  | 5163.79 | 3494.76 | 20       |
| H10_2  | 4085.89  | 4738.38 | 4117.17 | 18       |
| H13A_2 | -1215.64 | 3917.89 | 4602.47 | 28       |
| H13B_2 | 611.2    | 3808.61 | 4955.86 | 28       |
| H20_2  | 5879.83  | 5372.31 | 4487.91 | 24       |
| H21_2  | 6138.87  | 6171.71 | 4806.34 | 31       |
| H23_2  | -16.97   | 6465.06 | 4438.44 | 31       |
| H24_2  | -264.71  | 5667.18 | 4119.16 | 25       |
| H27_2  | 8132.66  | 6038.44 | 2796.3  | 45       |
| H28_2  | 9975.73  | 6744.83 | 3055.69 | 57       |
| H30_2  | 5075.74  | 7054.71 | 3890.13 | 45       |
| H31_2  | 3217.68  | 6350.45 | 3626.39 | 43       |

### Citations

CrysAlisPro Software System, Rigaku Oxford Diffraction, (2019).

O.V. Dolomanov and L.J. Bourhis and R.J. Gildea and J.A.K. Howard and H. Puschmann, Olex2: A complete structure solution, refinement and analysis program, *J. Appl. Cryst.*, (2009), **42**, 339-341.

Sheldrick, G.M., Crystal structure refinement with ShelXL, *Acta Cryst.*, (2015), **C27**, 3-8.

Sheldrick, G.M., ShelXT-Integrated space-group and crystal-structure determination, *Acta Cryst.*, (2015), **A71**, 3-8.

## 10.2. X-Ray Crystallographic Data for 8b

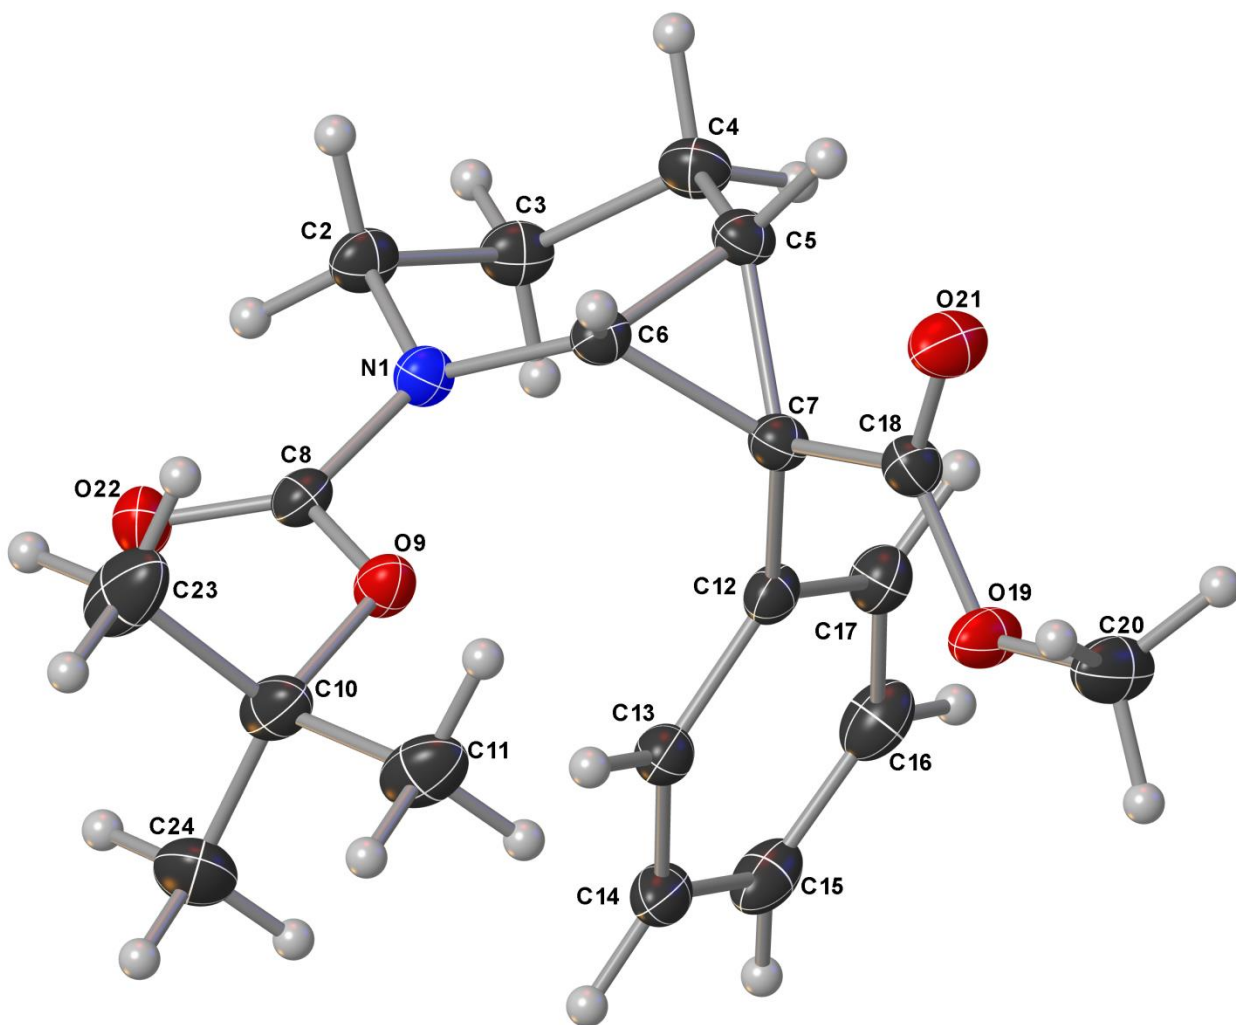

Table 1 Crystal data and structure refinement for US8.

|                                    |                                                 |
|------------------------------------|-------------------------------------------------|
| Identification code                | US8                                             |
| Empirical formula                  | C <sub>19</sub> H <sub>25</sub> NO <sub>4</sub> |
| Formula weight                     | 331.40                                          |
| Temperature/K                      | 106(7)                                          |
| Crystal system                     | orthorhombic                                    |
| Space group                        | P2 <sub>1</sub> 2 <sub>1</sub> 2 <sub>1</sub>   |
| a/Å                                | 8.28903(12)                                     |
| b/Å                                | 11.79462(19)                                    |
| c/Å                                | 18.8010(3)                                      |
| α/°                                | 90                                              |
| β/°                                | 90                                              |
| γ/°                                | 90                                              |
| Volume/Å <sup>3</sup>              | 1838.10(5)                                      |
| Z                                  | 4                                               |
| ρ <sub>calc</sub> /cm <sup>3</sup> | 1.198                                           |
| μ/mm <sup>-1</sup>                 | 0.678                                           |
| F(000)                             | 712.0                                           |

|                                             |                                                               |
|---------------------------------------------|---------------------------------------------------------------|
| Crystal size/mm <sup>3</sup>                | 0.334 × 0.227 × 0.128                                         |
| Radiation                                   | CuKα (λ = 1.54184)                                            |
| 2θ range for data collection/°              | 8.85 to 144.684                                               |
| Index ranges                                | -9 ≤ h ≤ 9, -14 ≤ k ≤ 14, -21 ≤ l ≤ 23                        |
| Reflections collected                       | 17416                                                         |
| Independent reflections                     | 3508 [R <sub>int</sub> = 0.0424, R <sub>sigma</sub> = 0.0275] |
| Data/restraints/parameters                  | 3508/65/307                                                   |
| Goodness-of-fit on F <sup>2</sup>           | 1.064                                                         |
| Final R indexes [I ≥ 2σ (I)]                | R <sub>1</sub> = 0.0264, wR <sub>2</sub> = 0.0654             |
| Final R indexes [all data]                  | R <sub>1</sub> = 0.0272, wR <sub>2</sub> = 0.0660             |
| Largest diff. peak/hole / e Å <sup>-3</sup> | 0.19/-0.15                                                    |
| Flack parameter                             | -0.11(6)                                                      |

Table 2 Fractional Atomic Coordinates (×10<sup>4</sup>) and Equivalent Isotropic Displacement Parameters (Å<sup>2</sup>×10<sup>3</sup>) for US8. U<sub>eq</sub> is defined as 1/3 of the trace of the orthogonalised U<sub>ij</sub> tensor.

| Atom | x          | y          | z          | U(eq)   |
|------|------------|------------|------------|---------|
| O9   | 6455.8(13) | 8047.6(9)  | 1910.0(6)  | 22.3(2) |
| O21  | 2511.0(13) | 8589.1(10) | 3446.1(7)  | 30.2(3) |
| O22  | 9112.2(14) | 8558.1(10) | 1899.5(6)  | 28.3(3) |
| O19  | 3039.0(13) | 6722.3(9)  | 3432.8(7)  | 27.8(3) |
| N1   | 7493.2(15) | 8896.1(10) | 2857.0(6)  | 19.9(3) |
| C12  | 6212.5(17) | 6927.2(12) | 3763.2(8)  | 19.5(3) |
| C8   | 7805.6(18) | 8504.4(12) | 2191.4(8)  | 20.6(3) |
| C18  | 3458.8(18) | 7811.0(13) | 3491.3(8)  | 21.8(3) |
| C6   | 5881.3(17) | 8940.1(12) | 3126.8(8)  | 18.7(3) |
| C13  | 6777.9(18) | 6219.7(12) | 3222.4(8)  | 21.9(3) |
| C5   | 5662.0(18) | 9127.7(12) | 3905.4(9)  | 20.9(3) |
| C7   | 5230.2(18) | 7964.7(12) | 3600.3(8)  | 19.5(3) |
| C3   | 8726.1(19) | 9061.5(14) | 4032.0(9)  | 24.5(3) |
| C17  | 6514(2)    | 6630.3(13) | 4465.8(9)  | 24.8(3) |
| C4   | 7108.6(19) | 9357.7(13) | 4374.9(8)  | 24.1(3) |
| C14  | 7670.2(19) | 5255.8(13) | 3384.6(9)  | 26.5(3) |
| C2   | 8776.0(18) | 9454.9(13) | 3266.2(9)  | 23.7(3) |
| C15  | 8000.4(19) | 4984.3(13) | 4085.5(10) | 29.3(4) |
| C16  | 7410(2)    | 5663.7(14) | 4625.7(9)  | 29.9(4) |
| C10  | 6413(2)    | 7686.0(14) | 1162.3(8)  | 28.6(4) |
| C11  | 4692(2)    | 7259.3(16) | 1089.0(10) | 34.2(4) |
| C20  | 1331(2)    | 6526.8(15) | 3307.9(12) | 35.1(4) |
| C23  | 6692(3)    | 8713.8(17) | 686.2(10)  | 43.2(5) |
| C24  | 7624(3)    | 6746.8(16) | 1026.9(11) | 40.5(4) |

Table 3 Anisotropic Displacement Parameters (Å<sup>2</sup>×10<sup>3</sup>) for US8. The Anisotropic displacement factor exponent takes the form: -2π<sup>2</sup>[h<sup>2</sup>a<sup>2</sup>U<sub>11</sub>+2hka\*b\*U<sub>12</sub>+...].

| Atom | U <sub>11</sub> | U <sub>22</sub> | U <sub>33</sub> | U <sub>23</sub> | U <sub>13</sub> | U <sub>12</sub> |
|------|-----------------|-----------------|-----------------|-----------------|-----------------|-----------------|
| O9   | 25.3(5)         | 22.5(5)         | 19.1(5)         | -0.4(4)         | -0.6(4)         | -5.0(4)         |

|     |          |          |          |          |          |           |
|-----|----------|----------|----------|----------|----------|-----------|
| O21 | 18.9(5)  | 23.9(5)  | 47.8(7)  | -1.9(5)  | -1.7(5)  | 2.8(4)    |
| O22 | 26.1(6)  | 29.6(6)  | 29.3(6)  | -2.2(5)  | 7.6(5)   | -5.1(5)   |
| O19 | 18.2(5)  | 20.3(5)  | 44.9(7)  | -4.1(5)  | 1.2(5)   | -1.0(4)   |
| N1  | 17.3(6)  | 20.9(6)  | 21.6(6)  | -1.2(5)  | -1.2(5)  | -1.4(5)   |
| C12 | 16.3(7)  | 18.1(7)  | 24.2(7)  | 2.4(5)   | 0.8(6)   | -1.9(5)   |
| C8  | 22.1(7)  | 16.4(6)  | 23.3(7)  | 2.5(5)   | -0.2(6)  | -1.9(5)   |
| C18 | 20.7(7)  | 22.0(7)  | 22.7(7)  | -1.8(6)  | 1.9(6)   | -0.2(6)   |
| C6  | 16.6(7)  | 17.3(6)  | 22.3(7)  | 0.1(6)   | -1.5(6)  | 0.6(5)    |
| C13 | 21.5(7)  | 20.0(7)  | 24.2(7)  | 0.8(6)   | 2.2(6)   | -0.8(6)   |
| C5  | 19.1(7)  | 19.7(7)  | 23.9(7)  | -3.0(6)  | 0.8(6)   | 2.3(6)    |
| C7  | 19.1(7)  | 19.0(7)  | 20.5(7)  | -1.5(5)  | 0.2(6)   | 0.9(5)    |
| C3  | 21.5(8)  | 24.4(8)  | 27.7(8)  | -2.8(6)  | -6.2(6)  | -0.3(6)   |
| C17 | 25.9(7)  | 24.4(8)  | 24.3(8)  | 3.2(6)   | 0.8(6)   | -1.9(6)   |
| C4  | 27.4(8)  | 23.0(7)  | 21.9(7)  | -3.7(6)  | -3.0(7)  | 0.3(6)    |
| C14 | 22.3(7)  | 20.5(7)  | 36.6(9)  | 1.4(6)   | 7.2(7)   | 1.1(6)    |
| C2  | 18.8(7)  | 23.3(7)  | 29.1(8)  | -2.1(6)  | -3.7(6)  | -3.1(6)   |
| C15 | 20.0(7)  | 22.3(8)  | 45.5(10) | 10.7(7)  | -1.5(7)  | 1.0(6)    |
| C16 | 29.6(8)  | 28.3(8)  | 31.9(8)  | 11.1(7)  | -6.3(7)  | -4.0(7)   |
| C10 | 42.8(10) | 24.1(7)  | 18.8(8)  | -1.1(6)  | -0.6(7)  | -7.5(7)   |
| C11 | 46.0(11) | 29.0(9)  | 27.5(9)  | -0.5(7)  | -10.0(8) | -8.8(8)   |
| C20 | 18.7(8)  | 28.3(8)  | 58.3(12) | -10.8(8) | 0.5(7)   | -2.6(6)   |
| C23 | 66.8(13) | 38.9(10) | 24.0(9)  | 7.7(8)   | -3.4(9)  | -18.3(10) |
| C24 | 51.1(11) | 33.1(9)  | 37.3(10) | -13.1(7) | 8.5(9)   | -5.8(8)   |

Table 4 Bond Lengths for US8.

| Atom | Atom | Length/Å   | Atom | Atom | Length/Å |
|------|------|------------|------|------|----------|
| O9   | C8   | 1.3498(18) | C6   | C5   | 1.492(2) |
| O9   | C10  | 1.4694(19) | C6   | C7   | 1.551(2) |
| O21  | C18  | 1.2110(19) | C13  | C14  | 1.390(2) |
| O22  | C8   | 1.2158(19) | C5   | C7   | 1.529(2) |
| O19  | C18  | 1.3350(18) | C5   | C4   | 1.513(2) |
| O19  | C20  | 1.4532(19) | C3   | C4   | 1.528(2) |
| N1   | C8   | 1.3589(19) | C3   | C2   | 1.513(2) |
| N1   | C6   | 1.4302(19) | C17  | C16  | 1.394(2) |
| N1   | C2   | 1.4686(19) | C14  | C15  | 1.383(3) |
| C12  | C13  | 1.396(2)   | C15  | C16  | 1.383(3) |
| C12  | C7   | 1.501(2)   | C10  | C11  | 1.519(3) |
| C12  | C17  | 1.389(2)   | C10  | C23  | 1.524(2) |
| C18  | C7   | 1.494(2)   | C10  | C24  | 1.516(3) |

Table 5 Bond Angles for US8.

| Atom | Atom | Atom | Angle/°    | Atom | Atom | Atom | Angle/°    |
|------|------|------|------------|------|------|------|------------|
| C8   | O9   | C10  | 120.71(12) | C4   | C5   | C7   | 124.40(13) |
| C18  | O19  | C20  | 114.82(12) | C12  | C7   | C6   | 122.19(12) |
| C8   | N1   | C6   | 121.13(12) | C12  | C7   | C5   | 121.85(13) |

|     |     |     |            |     |     |     |            |
|-----|-----|-----|------------|-----|-----|-----|------------|
| C8  | N1  | C2  | 119.81(12) | C18 | C7  | C12 | 117.53(13) |
| C6  | N1  | C2  | 118.31(12) | C18 | C7  | C6  | 110.68(13) |
| C13 | C12 | C7  | 121.38(14) | C18 | C7  | C5  | 112.98(12) |
| C17 | C12 | C13 | 118.77(14) | C5  | C7  | C6  | 57.91(10)  |
| C17 | C12 | C7  | 119.79(14) | C2  | C3  | C4  | 110.81(13) |
| O9  | C8  | N1  | 109.80(12) | C12 | C17 | C16 | 120.48(15) |
| O22 | C8  | O9  | 125.61(13) | C5  | C4  | C3  | 114.09(13) |
| O22 | C8  | N1  | 124.59(14) | C15 | C14 | C13 | 120.23(15) |
| O21 | C18 | O19 | 123.65(14) | N1  | C2  | C3  | 109.94(13) |
| O21 | C18 | C7  | 123.74(14) | C16 | C15 | C14 | 119.69(14) |
| O19 | C18 | C7  | 112.60(13) | C15 | C16 | C17 | 120.27(16) |
| N1  | C6  | C5  | 117.86(12) | O9  | C10 | C11 | 101.86(13) |
| N1  | C6  | C7  | 120.11(12) | O9  | C10 | C23 | 109.11(13) |
| C5  | C6  | C7  | 60.30(10)  | O9  | C10 | C24 | 110.90(14) |
| C14 | C13 | C12 | 120.51(15) | C11 | C10 | C23 | 110.63(16) |
| C6  | C5  | C7  | 61.79(10)  | C24 | C10 | C11 | 111.36(15) |
| C6  | C5  | C4  | 120.16(13) | C24 | C10 | C23 | 112.47(16) |

Table 6 Hydrogen Atom Coordinates ( $\text{\AA} \times 10^4$ ) and Isotropic Displacement Parameters ( $\text{\AA}^2 \times 10^3$ ) for US8.

| Atom | x        | y         | z        | U(eq)    |
|------|----------|-----------|----------|----------|
| H17  | 6080(20) | 7104(15)  | 4844(8)  | 30(5)    |
| H15  | 8630(20) | 4306(12)  | 4186(10) | 33(5)    |
| H14  | 8030(20) | 4770(15)  | 2996(8)  | 34(5)    |
| H4A  | 7130(20) | 10172(18) | 4474(10) | 29(5)    |
| H3A  | 9600(20) | 9426(17)  | 4278(11) | 26(5)    |
| H13  | 6550(20) | 6411(16)  | 2729(6)  | 26(5)    |
| H23A | 6000(20) | 9349(14)  | 834(12)  | 45.4(17) |
| H16  | 7590(30) | 5486(18)  | 5125(6)  | 34(5)    |
| H23B | 7808(12) | 8989(19)  | 723(12)  | 45.4(17) |
| H11A | 4520(30) | 6980(20)  | 597(14)  | 45.4(17) |
| H5   | 4680(20) | 9538(16)  | 4021(10) | 19(4)    |
| H11B | 4520(30) | 6620(20)  | 1423(13) | 45.4(17) |
| H4B  | 7020(20) | 9001(16)  | 4840(10) | 25(5)    |
| H2A  | 8600(20) | 10278(6)  | 3229(10) | 25(5)    |
| H3B  | 8890(20) | 8264(17)  | 4040(10) | 25(5)    |
| H24A | 7450(30) | 6456(19)  | 542(6)   | 45.4(17) |
| H20A | 1250(30) | 5702(7)   | 3240(13) | 45.4(17) |
| H2B  | 9808(14) | 9248(18)  | 3044(10) | 34(5)    |
| H6   | 5100(20) | 9262(16)  | 2812(10) | 20(4)    |
| H24B | 7470(30) | 6115(13)  | 1361(9)  | 45.4(17) |
| H20B | 750(30)  | 6801(19)  | 3730(8)  | 45.4(17) |
| H11C | 3890(30) | 7890(20)  | 1210(12) | 45.4(17) |
| H24C | 8735(13) | 7020(19)  | 1090(13) | 45.4(17) |
| H20C | 920(30)  | 6941(17)  | 2891(8)  | 45.4(17) |



## Experimental

Single crystals of C<sub>19</sub>H<sub>25</sub>NO<sub>4</sub> [US8] were []. A suitable crystal was selected and [The crystal was mounted on a None] on a XtaLAB Synergy, Dualflex, HyPix diffractometer. The crystal was kept at 106(7) K during data collection. Using Olex2 [1], the structure was solved with the ShelXT [2] structure solution program using Intrinsic Phasing and refined with the ShelXL [3] refinement package using Least Squares minimisation.

1. Dolomanov, O.V., Bourhis, L.J., Gildea, R.J, Howard, J.A.K. & Puschmann, H. (2009), *J. Appl. Cryst.* 42, 339-341.
2. Sheldrick, G.M. (2015). *Acta Cryst.* A71, 3-8.
3. Sheldrick, G.M. (2015). *Acta Cryst.* C71, 3-8.

## Crystal structure determination of [US8]

**Crystal Data** for C<sub>19</sub>H<sub>25</sub>NO<sub>4</sub> (*M* = 331.40 g/mol): orthorhombic, space group P2<sub>1</sub>2<sub>1</sub>2<sub>1</sub> (no. 19), *a* = 8.28903(12) Å, *b* = 11.79462(19) Å, *c* = 18.8010(3) Å, *V* = 1838.10(5) Å<sup>3</sup>, *Z* = 4, *T* = 106(7) K, μ(CuKα) = 0.678 mm<sup>-1</sup>, *D*<sub>calc</sub> = 1.198 g/cm<sup>3</sup>, 17416 reflections measured (8.85° ≤ 2θ ≤ 144.684°), 3508 unique (*R*<sub>int</sub> = 0.0424, *R*<sub>sigma</sub> = 0.0275) which were used in all calculations. The final *R*<sub>1</sub> was 0.0264 (*I* > 2σ(*I*)) and *wR*<sub>2</sub> was 0.0660 (all data).

## Refinement model description

Number of restraints - 65, number of constraints - unknown.

Details:

1. Restrained distances

C2-H2A ≈ C2-H2B ≈ C23-H23A ≈ C23-H23B ≈ C23-H23C ≈

C24-H24B ≈ C24-H24A ≈ C24-

H24C ≈ C20-H20A ≈ C20-H20B ≈ C20-H20C

with sigma of 0.002

C16-H16 ≈ C17-H17 ≈ C15-H15 ≈ C14-H14 ≈ C13-H13

with sigma of 0.005

2. Uiso/Uanisotropy restraints and constraints

Uiso(H24C) = Uiso(H24A) = Uiso(H24B) = Uiso(H11A) = Uiso(H11B) = Uiso(H11C) =

Uiso(H23C) = Uiso(H23B) = Uiso(H23A) = Uiso(H20C) = Uiso(H20A) = Uiso(H20B)

This report has been created with Olex2, compiled on 2018.07.26 svn.r3523 for OlexSys. Please [let us know](#) if there are any errors or if you would like to have additional features.

### 10.3. X-Ray Crystallographic Data for *N*-COCF<sub>3</sub>-9a

#### Crystal Data and Experimental

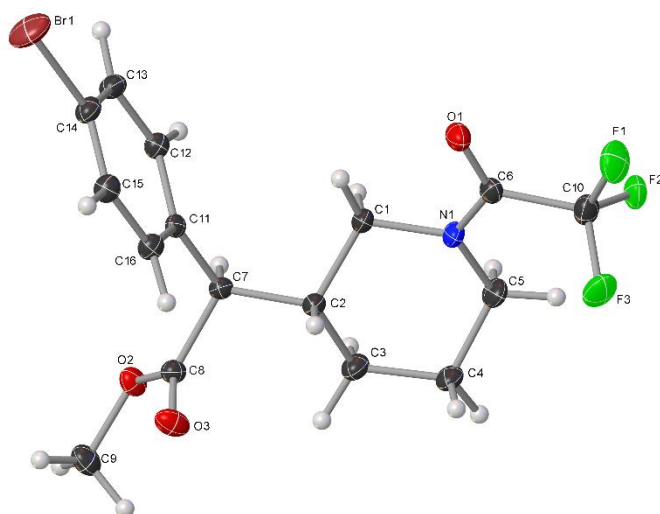

**Experimental.** Single colourless needle-shaped crystals of **US96** were chosen from the sample as supplied. A suitable crystal 0.39×0.12×0.10 mm<sup>3</sup> was selected and mounted on a loop with paratone oil on an XtaLAB Synergy, Dualflex, HyPix diffractometer. The crystal was kept at a steady  $T = 100.01(10)$  K during data collection. The structure was solved with the **ShelXT** (Sheldrick, 2015) structure solution program using the Intrinsic Phasing solution method and by using **Olex2** (Dolomanov et al., 2009) as the graphical interface. The model was refined with version 2018/3 of **ShelXL** (Sheldrick, 2015) using Least Squares minimisation.

**Crystal Data.** C<sub>16</sub>H<sub>17</sub>BrF<sub>3</sub>NO<sub>3</sub>,  $M_r = 408.21$ , monoclinic,  $P2_1$  (No. 4),  $a = 8.8333(2)$  Å,  $b = 8.6844(2)$  Å,  $c = 11.4854(3)$  Å,  $\beta = 107.078(3)^\circ$ ,  $a = \gamma = 90^\circ$ ,  $V = 842.22(4)$  Å<sup>3</sup>,  $T = 100.01(10)$  K,  $Z = 2$ ,  $Z' = 1$ ,  $m(\text{MoK}\alpha) = 2.485$  mm<sup>-1</sup>, 20214 reflections measured, 7976 unique ( $R_{int} = 0.0321$ ) which were used in all calculations. The final  $wR_2$  was 0.0993 (all data) and  $R_1$  was 0.0406 ( $I > 2\sigma(I)$ ).

| Compound                          | US96                                                             |
|-----------------------------------|------------------------------------------------------------------|
| Formula                           | C <sub>16</sub> H <sub>17</sub> BrF <sub>3</sub> NO <sub>3</sub> |
| $D_{calc.}/\text{g cm}^{-3}$      | 1.610                                                            |
| $m/\text{mm}^{-1}$                | 2.485                                                            |
| Formula Weight                    | 408.21                                                           |
| Colour                            | colourless                                                       |
| Shape                             | needle                                                           |
| Size/mm <sup>3</sup>              | 0.39×0.12×0.10                                                   |
| $T/\text{K}$                      | 100.01(10)                                                       |
| Crystal System                    | monoclinic                                                       |
| Flack Parameter                   | -0.003(3)                                                        |
| Hooft Parameter                   | 0.017(2)                                                         |
| Space Group                       | $P2_1$                                                           |
| $a/\text{Å}$                      | 8.8333(2)                                                        |
| $b/\text{Å}$                      | 8.6844(2)                                                        |
| $c/\text{Å}$                      | 11.4854(3)                                                       |
| $a^\circ$                         | 90                                                               |
| $b^\circ$                         | 107.078(3)                                                       |
| $g^\circ$                         | 90                                                               |
| $V/\text{Å}^3$                    | 842.22(4)                                                        |
| $Z$                               | 2                                                                |
| $Z'$                              | 1                                                                |
| Wavelength/Å                      | 0.71073                                                          |
| Radiation type                    | MoK $\alpha$                                                     |
| $Q_{min}^\circ$                   | 2.412                                                            |
| $Q_{max}^\circ$                   | 36.317                                                           |
| Measured Refl.                    | 20214                                                            |
| Independent Refl.                 | 7976                                                             |
| Reflections with $I > 2\sigma(I)$ | 6370                                                             |
| $R_{int}$                         | 0.0321                                                           |
| Parameters                        | 217                                                              |
| Restraints                        | 60                                                               |
| Largest Peak                      | 0.969                                                            |
| Deepest Hole                      | -0.675                                                           |
| GooF                              | 1.019                                                            |
| $wR_2$ (all data)                 | 0.0993                                                           |
| $wR_2$                            | 0.0933                                                           |
| $R_1$ (all data)                  | 0.0589                                                           |
| $R_1$                             | 0.0406                                                           |

## Structure Quality Indicators

|              |            |        |             |      |                  |       |                         |       |       |         |
|--------------|------------|--------|-------------|------|------------------|-------|-------------------------|-------|-------|---------|
| Reflections: | d min (Mo) | 0.60   | I/ $\sigma$ | 22.4 | R <sub>int</sub> | 3.21% | complete<br>100% (IUCr) | 99%   |       |         |
| Refinement:  | Shift      | -0.007 | Max Peak    | 1.0  | Min Peak         | -0.7  | Goof                    | 1.019 | Flack | .003(3) |

A colourless needle-shaped crystal with dimensions 0.39×0.12×0.10 mm<sup>3</sup> was mounted on a loop with paratone oil. Data were collected using an XtaLAB Synergy, Dualflex, HyPix diffractometer equipped with an Oxford Cryosystems low-temperature device operating at  $T = 100.01(10)$  K.

Data were measured using  $\omega$  scans using MoK $\alpha$  radiation. The total number of runs and images was based on the strategy calculation from the program **CrysAlisPro** (Rigaku, V1.171.40.37a, 2019). The maximum resolution that was achieved was  $Q = 36.317^\circ$  (0.60 Å).

The diffraction pattern was indexed using the program **CrysAlisPro** (Rigaku, V1.171.40.37a, 2019) and the unit cell was refined using **CrysAlisPro** (Rigaku, V1.171.40.37a, 2019) on 9810 reflections, 49% of the observed reflections. Data reduction, scaling and absorption corrections were performed using **CrysAlisPro** (Rigaku, V1.171.40.37a, 2019). The final completeness is 99.80 % out to  $36.317^\circ$  in  $Q$ . A numerical absorption correction based on Gaussian integration over a multifaceted crystal model was performed using **CrysAlisPro** (Rigaku, V1.171.40.37a, 2019). An empirical absorption correction using spherical harmonics as implemented in SCALE3 ABSPACK (Rigaku, V1.171.40.37a, 2019) was also used. The absorption coefficient  $m$  of this material is 2.485 mm<sup>-1</sup> at this wavelength ( $\lambda = 0.711\text{Å}$ ) and the minimum and maximum transmissions are 0.448 and 1.000.

The structure was solved and the space group  $P2_1$  (# 4) determined by the **ShelXT** (Sheldrick, 2015) structure solution program using Intrinsic Phasing and refined by Least Squares using version 2018/3 of **ShelXL** (Sheldrick, 2015). All non-hydrogen atoms were refined anisotropically. Hydrogen atom positions were located from the difference maps and refined using restraints.

There is a single molecule in the asymmetric unit, which is represented by the reported sum formula. In other words: Z is 2 and Z' is 1.

The Flack parameter was refined to -0.003(3). Determination of absolute structure using Bayesian statistics on Bijvoet differences using the Olex2 results in 0.017(2). Note: The Flack parameter is used to determine chirality of the crystal studied, the value should be near 0, a value of 1 means that the stereochemistry is wrong and the model should be inverted. A value of 0.5 means that the crystal consists of a racemic mixture of the two enantiomers.

### Images of the Crystal on the Diffractometer

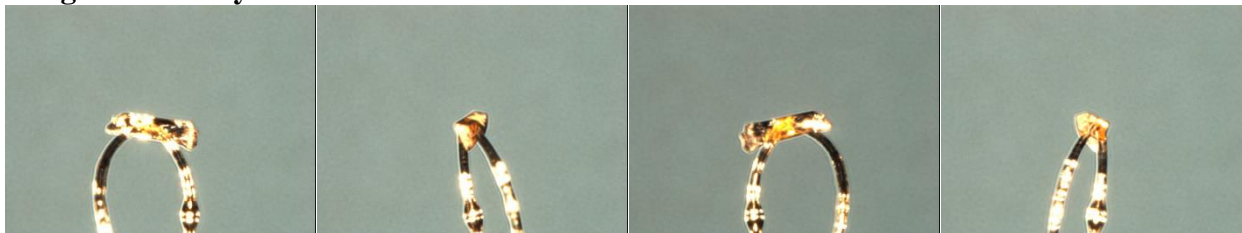

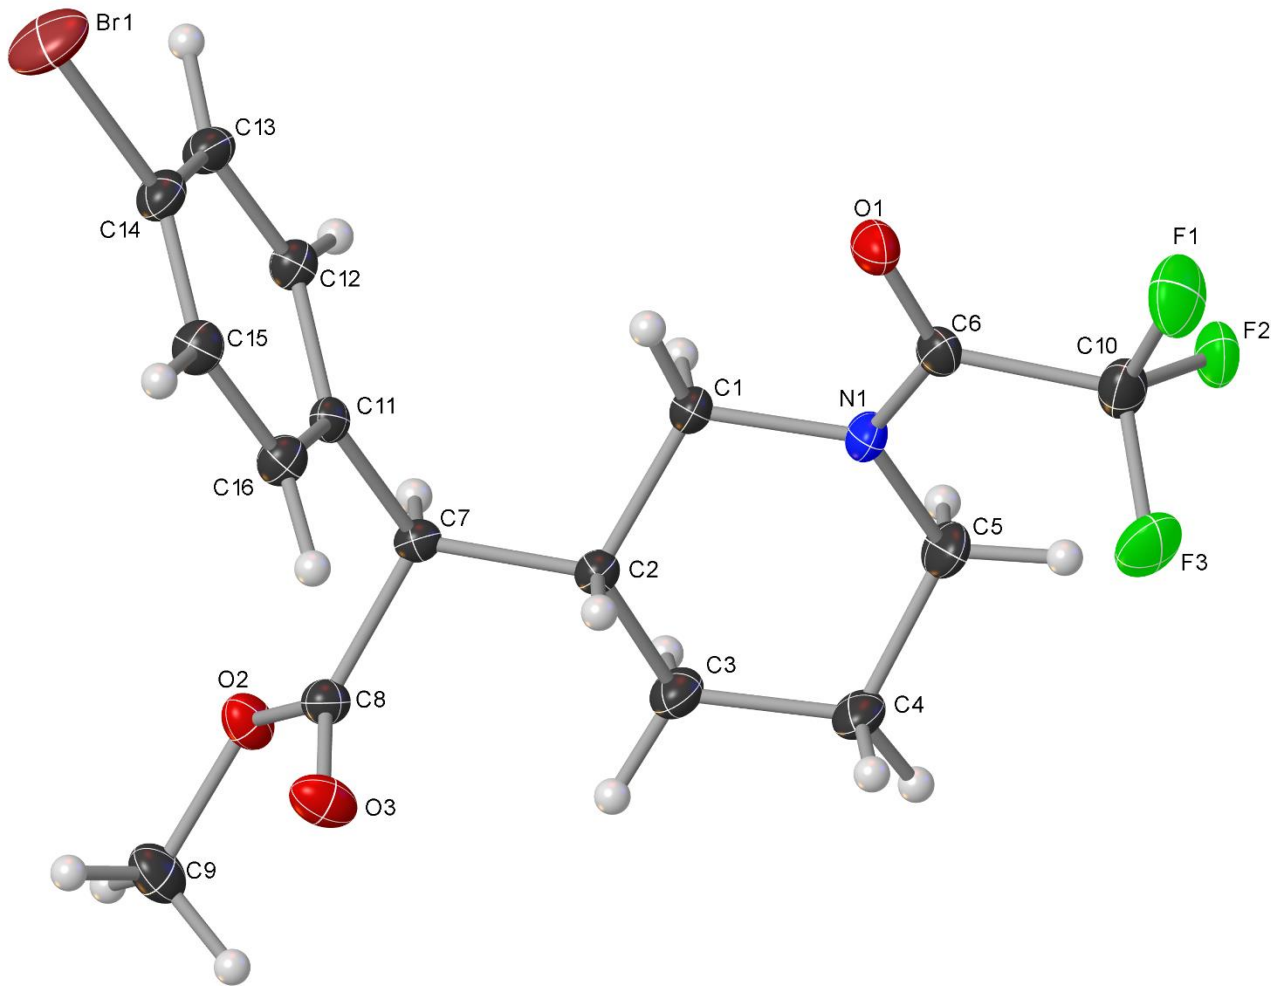

Figure 1:

### Data Plots: Diffraction Data

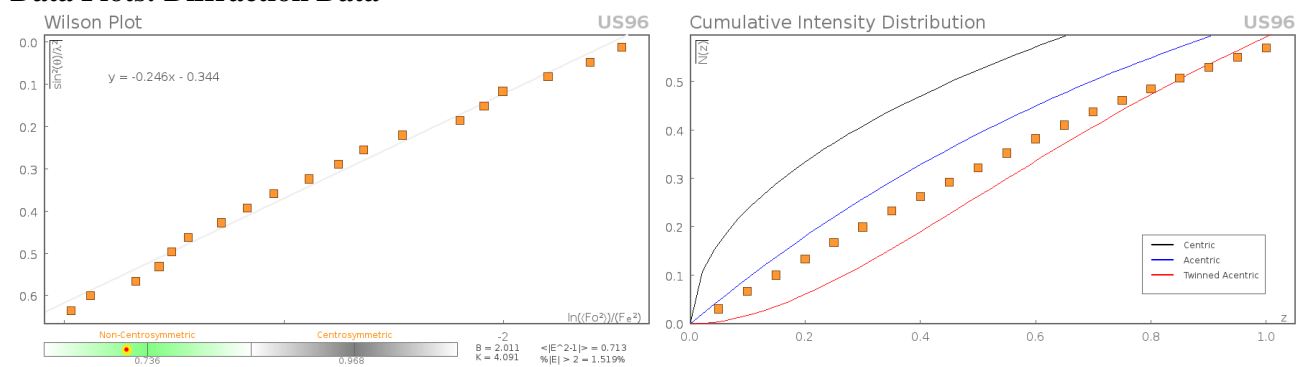

Systematic Absences Intensity Distribution US96

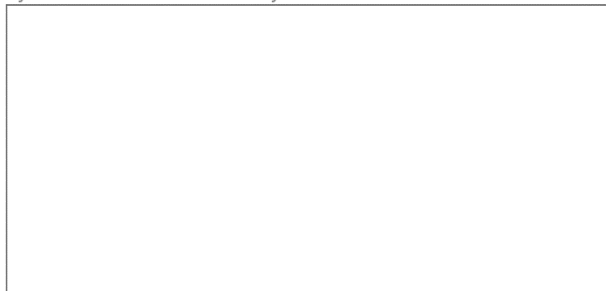

Completeness Plot US96

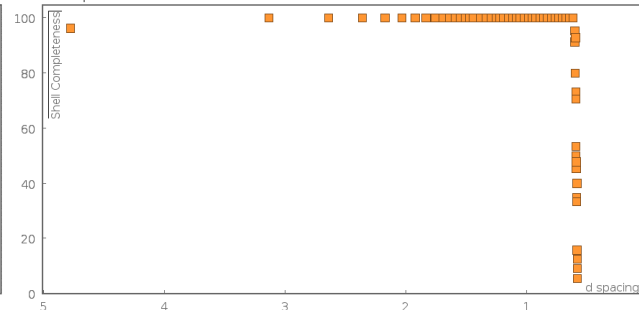

I/sigma vs. Resolution US96

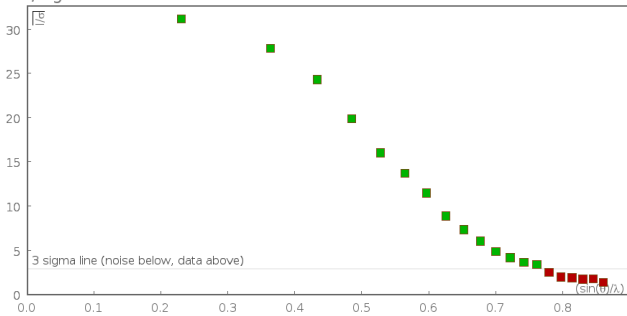

## Data Plots: Refinement and Data

Fobs vs Fcalc US96

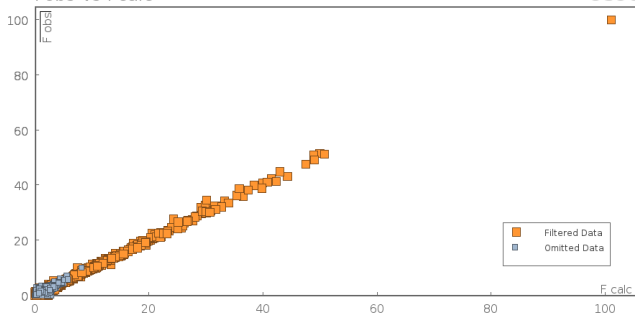

Normal Probability Plot US96

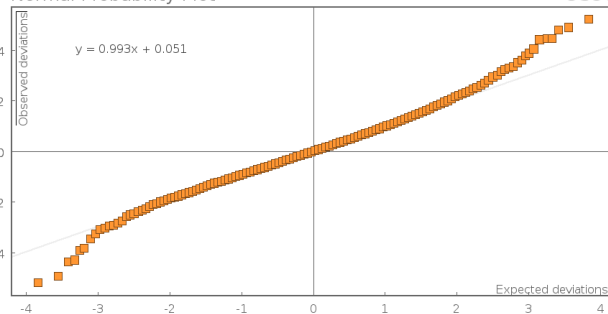

## Reflection Statistics

|                                     |                                    |                                |                 |
|-------------------------------------|------------------------------------|--------------------------------|-----------------|
| Total reflections (after filtering) | 20233                              | Unique reflections             | 7976            |
| Completeness                        | 0.977                              | Mean I/s                       | 17.04           |
| hkl <sub>max</sub> collected        | (14, 14, 19)                       | hkl <sub>min</sub> collected   | (-15, -15, -19) |
| hkl <sub>max</sub> used             | (14, 14, 19)                       | hkl <sub>min</sub> used        | (-14, -14, 0)   |
| Lim d <sub>max</sub> collected      | 20.0                               | Lim d <sub>min</sub> collected | 0.6             |
| d <sub>max</sub> used               | 8.44                               | d <sub>min</sub> used          | 0.6             |
| Friedel pairs                       | 5055                               | Friedel pairs merged           | 0               |
| Inconsistent equivalents            | 2                                  | R <sub>int</sub>               | 0.0321          |
| R <sub>sigma</sub>                  | 0.0447                             | Intensity transformed          | 0               |
| Omitted reflections                 | 0                                  | Omitted by user (OMIT hkl)     | 19              |
| Multiplicity                        | (7523, 4412, 1122, 193, 42, 13, 2) | Maximum multiplicity           | 11              |
| Removed systematic absences         | 0                                  | Filtered off (Shel/OMIT)       | 554             |

**Table 1:** Fractional Atomic Coordinates ( $\times 10^4$ ) and Equivalent Isotropic Displacement Parameters ( $\text{\AA}^2 \times 10^3$ ) for US96.  $U_{eq}$  is defined as 1/3 of the trace of the orthogonalised  $U_{ij}$ .

| Atom | x          | y         | z         | $U_{eq}$ |
|------|------------|-----------|-----------|----------|
| Br1  | 10202.9(4) | 8500.9(3) | 9945.2(3) | 36.82(9) |
| F2   | 4231.7(17) | 8488(2)   | 815.0(12) | 27.3(3)  |

| Atom | x           | y        | z          | $U_{eq}$ |
|------|-------------|----------|------------|----------|
| F3   | 6620(2)     | 7895(3)  | 864.7(17)  | 37.4(4)  |
| F1   | 6086(3)     | 10149(2) | 1427.8(17) | 36.0(4)  |
| O1   | 6577(2)     | 9079(2)  | 3588.8(16) | 23.4(4)  |
| O2   | 7801(2)     | 1321(2)  | 6247.6(17) | 20.2(3)  |
| O3   | 9779(2)     | 2430(2)  | 5680.9(19) | 24.3(4)  |
| N1   | 5839(3)     | 6622(2)  | 2972.0(17) | 19.1(4)  |
| C13  | 7789(3)     | 6705(3)  | 8337(2)    | 19.5(4)  |
| C8   | 8508(3)     | 2512(3)  | 5868(2)    | 16.6(4)  |
| C6   | 6098(3)     | 8109(3)  | 2796(2)    | 18.2(4)  |
| C15  | 10372.1(19) | 6546(3)  | 8005(2)    | 19.3(4)  |
| C14  | 9386(3)     | 7109(3)  | 8644(2)    | 19.5(4)  |
| C12  | 7203(2)     | 5690(2)  | 7366.3(19) | 16.7(4)  |
| C10  | 5756(3)     | 8656(3)  | 1456(2)    | 23.7(5)  |
| C4   | 6180(2)     | 4074(3)  | 2157.6(19) | 21.9(4)  |
| C2   | 7271(2)     | 4617(3)  | 4413.0(19) | 15.5(4)  |
| C11  | 8173(3)     | 5083(2)  | 6719.9(18) | 13.8(3)  |
| C16  | 9765(3)     | 5526(3)  | 7041.2(19) | 17.7(4)  |
| C7   | 7480(3)     | 3946(2)  | 5697.2(19) | 15.2(4)  |
| C3   | 6548.6(18)  | 3403(2)  | 3442.3(19) | 21.6(4)  |
| C1   | 6201(2)     | 6041(2)  | 4227.9(17) | 18.5(4)  |
| C5   | 5103(2)     | 5477(3)  | 2025.0(16) | 22.9(4)  |
| C9   | 8694(2)     | -110(2)  | 6427.9(13) | 24.9(5)  |

**Table 2:** Anisotropic Displacement Parameters ( $\times 10^4$ ) **US96**. The anisotropic displacement factor exponent takes the form:  $-2p^2[h^2a^{*2} \times U_{11} + \dots + 2hka^* \times b^* \times U_{12}]$

| Atom | $U_{11}$  | $U_{22}$  | $U_{33}$  | $U_{23}$   | $U_{13}$ | $U_{12}$   |
|------|-----------|-----------|-----------|------------|----------|------------|
| Br1  | 37.91(15) | 42.39(17) | 29.57(13) | -21.55(12) | 8.97(10) | -11.12(14) |
| F2   | 25.9(6)   | 35.6(8)   | 16.6(6)   | 4.6(7)     | 0.3(5)   | 5.8(8)     |
| F3   | 36.7(9)   | 55.5(12)  | 26.0(8)   | 0.5(7)     | 18.7(7)  | 9.9(8)     |
| F1   | 46.8(11)  | 32.3(9)   | 28.0(9)   | 10.3(7)    | 9.8(8)   | -6.4(8)    |
| O1   | 26.6(9)   | 20.4(8)   | 18.7(7)   | -1.0(6)    | -0.5(7)  | 3.8(7)     |
| O2   | 19.8(8)   | 18.0(8)   | 24.0(8)   | 5.6(6)     | 8.1(6)   | 0.1(6)     |
| O3   | 20.6(8)   | 19.8(8)   | 36.3(10)  | 2.5(7)     | 14.2(8)  | 1.4(7)     |
| N1   | 23.5(9)   | 19.7(9)   | 11.8(7)   | -1.4(6)    | 1.5(7)   | 2.3(7)     |
| C13  | 22.9(11)  | 20.1(10)  | 17.2(9)   | -2.2(7)    | 8.3(8)   | 0.9(9)     |
| C8   | 17.5(9)   | 15.7(9)   | 17.2(9)   | -0.3(7)    | 6.2(7)   | 0.5(8)     |
| C6   | 15.5(9)   | 21.6(11)  | 16.3(9)   | 1.2(7)     | 2.7(7)   | 3.5(7)     |
| C15  | 18.1(10)  | 20.7(10)  | 18.5(9)   | -1.0(7)    | 4.5(8)   | -3.0(8)    |
| C14  | 23.9(11)  | 18.7(10)  | 15.0(9)   | -3.1(7)    | 4.4(8)   | -1.8(8)    |
| C12  | 16.8(10)  | 16.9(10)  | 16.6(8)   | 0.3(6)     | 5.5(8)   | -2.2(7)    |
| C10  | 23.3(10)  | 30.5(13)  | 17.7(9)   | 3.5(9)     | 6.7(8)   | 2.6(10)    |
| C4   | 29.7(12)  | 18.7(10)  | 16.4(9)   | -5.1(7)    | 5.3(8)   | 0.0(9)     |
| C2   | 17.1(9)   | 15.6(9)   | 13.6(8)   | -1.1(6)    | 4.4(7)   | 0.6(7)     |
| C11  | 15.5(9)   | 13.5(8)   | 12.9(8)   | 2.4(6)     | 4.9(7)   | 0.2(7)     |
| C16  | 16.8(10)  | 19.5(10)  | 17.4(9)   | -0.8(7)    | 5.9(8)   | -1.9(8)    |
| C7   | 15.7(9)   | 15.5(9)   | 15.2(8)   | -1.4(6)    | 5.5(7)   | 0.3(7)     |
| C3   | 27.1(10)  | 20.0(10)  | 17.4(8)   | -3.9(9)    | 6.2(8)   | -0.9(11)   |
| C1   | 22.6(11)  | 19.7(9)   | 12.5(8)   | -0.4(7)    | 3.9(7)   | 3.7(9)     |
| C5   | 24.4(11)  | 25.7(11)  | 14.2(9)   | -4.9(8)    | -1.2(8)  | 0.2(10)    |
| C9   | 26.2(12)  | 19.3(11)  | 29.6(12)  | 6.8(9)     | 8.6(10)  | 3.0(9)     |

**Table 3:** Bond Lengths in Å for **US96**.

| Atom | Atom | Length/Å | Atom | Atom | Length/Å |
|------|------|----------|------|------|----------|
| Br1  | C14  | 1.892(2) | F3   | C10  | 1.336(3) |
| F2   | C10  | 1.339(3) | F1   | C10  | 1.332(3) |

| Atom | Atom | Length/Å |
|------|------|----------|
| O1   | C6   | 1.221(3) |
| O2   | C8   | 1.346(3) |
| O2   | C9   | 1.454(3) |
| O3   | C8   | 1.205(3) |
| N1   | C6   | 1.337(3) |
| N1   | C1   | 1.472(3) |
| N1   | C5   | 1.476(3) |
| C13  | C14  | 1.394(3) |
| C13  | C12  | 1.396(3) |
| C8   | C7   | 1.520(3) |
| C6   | C10  | 1.554(3) |

| Atom | Atom | Length/Å |
|------|------|----------|
| C15  | C14  | 1.383(3) |
| C15  | C16  | 1.396(3) |
| C12  | C11  | 1.392(3) |
| C4   | C3   | 1.530(3) |
| C4   | C5   | 1.526(3) |
| C2   | C7   | 1.546(3) |
| C2   | C3   | 1.531(3) |
| C2   | C1   | 1.533(3) |
| C11  | C16  | 1.399(3) |
| C11  | C7   | 1.519(3) |

**Table 4:** Bond Angles in ° for **US96**.

| Atom | Atom | Atom | Angle/°    |
|------|------|------|------------|
| C8   | O2   | C9   | 114.76(17) |
| C6   | N1   | C1   | 118.77(18) |
| C6   | N1   | C5   | 126.67(19) |
| C1   | N1   | C5   | 114.41(16) |
| C14  | C13  | C12  | 118.15(15) |
| O2   | C8   | C7   | 110.78(19) |
| O3   | C8   | O2   | 123.9(2)   |
| O3   | C8   | C7   | 125.3(2)   |
| O1   | C6   | N1   | 126.2(2)   |
| O1   | C6   | C10  | 116.9(2)   |
| N1   | C6   | C10  | 116.9(2)   |
| C14  | C15  | C16  | 119.36(16) |
| C13  | C14  | Br1  | 118.94(17) |
| C15  | C14  | Br1  | 119.41(18) |
| C15  | C14  | C13  | 121.6(2)   |
| C11  | C12  | C13  | 121.51(16) |
| F2   | C10  | C6   | 112.5(2)   |
| F3   | C10  | F2   | 107.4(2)   |
| F3   | C10  | C6   | 112.2(2)   |
| F1   | C10  | F2   | 106.5(2)   |
| F1   | C10  | F3   | 107.9(2)   |
| F1   | C10  | C6   | 110.0(2)   |
| C5   | C4   | C3   | 110.50(13) |
| C3   | C2   | C7   | 110.01(17) |
| C3   | C2   | C1   | 110.24(15) |
| C1   | C2   | C7   | 109.42(16) |
| C12  | C11  | C16  | 118.95(19) |
| C12  | C11  | C7   | 119.15(19) |
| C16  | C11  | C7   | 121.90(18) |
| C15  | C16  | C11  | 120.38(16) |
| C8   | C7   | C2   | 109.35(17) |
| C11  | C7   | C8   | 110.08(18) |
| C11  | C7   | C2   | 113.61(17) |
| C4   | C3   | C2   | 111.42(16) |
| N1   | C1   | C2   | 111.10(16) |
| N1   | C5   | C4   | 109.74(15) |

**Table 5:** Hydrogen Fractional Atomic Coordinates ( $\times 10^4$ ) and Equivalent Isotropic Displacement Parameters ( $\text{\AA}^2 \times 10^3$ ) for **US96**.  $U_{eq}$  is defined as 1/3 of the trace of the orthogonalised  $U_{ij}$ .

| Atom | x        | y       | z       | $U_{eq}$ |
|------|----------|---------|---------|----------|
| H13  | 7054.2   | 7109    | 8766.09 | 0        |
| H15  | 11513.61 | 6793    | 8252.11 | 0        |
| H16  | 10442.2  | 5138.61 | 6558.3  | 0        |
| H12  | 6068.6   | 5417.5  | 7083.61 | 0        |
| H7   | 6390.6   | 3577.2  | 5765.19 | 0        |
| H1A  | 5180.3   | 5776.69 | 4382.2  | 0        |
| H3A  | 5543.4   | 3001.5  | 3553.21 | 0        |
| H5A  | 4849.4   | 5968.8  | 1206.01 | 0        |
| H4A  | 7189.01  | 4295.2  | 1972.5  | 0        |
| H4B  | 5614.2   | 3339.2  | 1509.81 | 0        |
| H2   | 8319.3   | 4983.81 | 4363.79 | 0        |
| H3B  | 7265.89  | 2493.7  | 3592.3  | 0        |
| H9A  | 8091.9   | -972.81 | 6655.61 | 0        |
| H9B  | 9698.6   | 57.9    | 7095.09 | 0        |
| H1B  | 6643.3   | 6889.21 | 4811.5  | 0        |
| H5B  | 4051.2   | 5166.29 | 2103.3  | 0        |
| H9C  | 8950.5   | -379.1  | 5663    | 0        |

### Citations

CrysAlisPro Software System, Rigaku Oxford Diffraction, (2019).

O.V. Dolomanov and L.J. Bourhis and R.J. Gildea and J.A.K. Howard and H. Puschmann, Olex2: A complete structure solution, refinement and analysis program, *J. Appl. Cryst.*, (2009), **42**, 339-341.

Sheldrick, G.M., Crystal structure refinement with ShelXL, *Acta Cryst.*, (2015), **C27**, 3-8.

Sheldrick, G.M., ShelXT-Integrated space-group and crystal-structure determination, *Acta Cryst.*, (2015), **A71**, 3-8.



```

#=====  

# PLATON/CHECK-( 70414) versus check.def version of 310314 for Entry: us96  

# Data: US96.cif - Type: CIF          Bond Precision C-C = 0.0031 A  

# Refl: US96.fcf - Type: LIST4          Temp = 100 K  

#          X-Ray      Nref/Npar = 19.8  

# Cell  8.8333(2) 8.6844(2) 11.4854(3)   90 107.078(3)   90  

# Wavelength 0.71073 Volume Reported 842.22(4) Calculated 842.22(4)  

# SpaceGroup from Symmetry P 21 Hall: P 2yb monoclinic  

#          Reported P 1 21 1 P 2yb monoclinic  

# MoietyFormula C16 H17 Br F3 N O3  

#          Reported C16 H17 Br F3 N O3  

#          SumFormula C16 H17 Br F3 N O3  

#          Reported C16 H17 Br F3 N O3  

# Mr      = 408.21[Calc], 408.21[Rep]  

# Dx,gcm-3 = 1.610[Calc], 1.610[Rep]  

# Z       = 2[Calc], 2[Rep]  

# Mu (mm-1) = 2.485[Calc], 2.485[Rep]  

# F000    = 412.0[Calc], 412.0[Rep] or F000' = 411.68[Calc]  

# Reported T Limits: Tmin=0.448 Tmax=1.000 AbsCorr=GAUSSIAN  

# Calculated T Limits: Tmin=0.715 Tmin'=0.378 Tmax=0.784  

# Reported Hmax= 14, Kmax= 14, Lmax= 19, Nref= 7976 , Th(max)= 36.317  

# Obs in FCF Hmax= 14, Kmax= 14, Lmax= 19, Nref= 7976[ 4290], Th(max)= 36.317  

# Calculated Hmax= 14, Kmax= 14, Lmax= 19, Nref= 8160[ 4292], Ratio=1.86/0.98  

# Reported Rho(min) = -0.68, Rho(max) = 0.97 e/Ang**3 (From CIF)  

# Calculated Rho(min) = -0.57, Rho(max) = 0.88 e/Ang**3 (From CIF+FCF data)  

# w=1/[sigma**2(Fo**2)+(0.0578P)**2], P=(Fo**2+2*Fc**2)/3  

# R= 0.0406( 6369), wR2= 0.0993( 7976), S = 1.019 (From CIF+FCF data)  

# R= 0.0406( 6369), wR2= 0.0993( 7976), S = 1.019 (From FCF data only)  

# R= 0.0406( 6370), wR2= 0.0993( 7976), S = 1.019, Npar= 217, Flack -0.003(3)  

# Number Bijvoet Pairs = 3686 ( 95%) ( 2523 Selected for: Parsons -0.001(2)  

# P2(tr) 1.000, P3(tr) 1.000, P3(tw) 0.000, Student-T Nu 18.85, Hooft -0.001(4)  

#=====  

For Documentation: http://http://www.platonsoft.nl/CIF-VALIDATION.pdf  

#=====

```

```

#=====  

>>> The Following Improvement and Query ALERTS were generated - (Acta-Mode) <<<  

#=====  

Format: alert-number_ALERT_alert-type_alert-level text

```

```

751_ALERT_4_C Bond Calc 0.99000, Rep 0.9877(15) ..... Senseless su
C13 -H13 1.555 1.555 # 14
751_ALERT_4_C Bond Calc 0.99000, Rep 0.9875(15) ..... Senseless su
C15 -H15 1.555 1.555 # 19
751_ALERT_4_C Bond Calc 0.99000, Rep 0.9867(18) ..... Senseless su
C12 -H12 1.555 1.555 # 21
751_ALERT_4_C Bond Calc 0.99000, Rep 0.9940(17) ..... Senseless su
C4 -H4A 1.555 1.555 # 24
751_ALERT_4_C Bond Calc 1.00000, Rep 0.9960(16) ..... Senseless su
C4 -H4B 1.555 1.555 # 25
751_ALERT_4_C Bond Calc 1.00000, Rep 0.9959(16) ..... Senseless su
C2 -H2 1.555 1.555 # 29
751_ALERT_4_C Bond Calc 0.99000, Rep 0.9865(17) ..... Senseless su
C16 -H16 1.555 1.555 # 32
751_ALERT_4_C Bond Calc 1.04000, Rep 1.039(2) ..... Senseless su
C7 -H7 1.555 1.555 # 33
751_ALERT_4_C Bond Calc 1.00000, Rep 0.9964(16) ..... Senseless su
C3 -H3A 1.555 1.555 # 34
751_ALERT_4_C Bond Calc 1.00000, Rep 0.9955(17) ..... Senseless su
C3 -H3B 1.555 1.555 # 35
751_ALERT_4_C Bond Calc 1.00000, Rep 0.9952(16) ..... Senseless su
C1 -H1A 1.555 1.555 # 36
751_ALERT_4_C Bond Calc 1.00000, Rep 0.9955(16) ..... Senseless su
C1 -H1B 1.555 1.555 # 37
751_ALERT_4_C Bond Calc 1.00000, Rep 0.9968(16) ..... Senseless su
C5 -H5A 1.555 1.555 # 38
751_ALERT_4_C Bond Calc 1.00000, Rep 0.9966(16) ..... Senseless su
C5 -H5B 1.555 1.555 # 39
751_ALERT_4_C Bond Calc 1.00000, Rep 0.9973(14) ..... Senseless su
C9 -H9A 1.555 1.555 # 40
751_ALERT_4_C Bond Calc 1.00000, Rep 0.9980(17) ..... Senseless su
C9 -H9B 1.555 1.555 # 41

```

|                     |                   |              |                  |              |
|---------------------|-------------------|--------------|------------------|--------------|
| 751_ALERT_4_C Bond  | Calc              | 1.00000, Rep | 0.9971(17) ..... | Senseless su |
| C9 -H9C             | 1.555 1.555       | #            | 42               |              |
| 752_ALERT_4_C Angle | Calc              | 123.00, Rep  | 123.2(2) .....   | Senseless su |
| C14 -C13 -H13       | 1.555 1.555 1.555 | #            | 6                |              |
| 752_ALERT_4_C Angle | Calc              | 119.00, Rep  | 118.6(2) .....   | Senseless su |
| C12 -C13 -H13       | 1.555 1.555 1.555 | #            | 7                |              |
| 752_ALERT_4_C Angle | Calc              | 121.00, Rep  | 121.4(2) .....   | Senseless su |
| C14 -C15 -H15       | 1.555 1.555 1.555 | #            | 15               |              |
| 752_ALERT_4_C Angle | Calc              | 119.00, Rep  | 119.1(2) .....   | Senseless su |
| C16 -C15 -H15       | 1.555 1.555 1.555 | #            | 16               |              |
| 752_ALERT_4_C Angle | Calc              | 121.00, Rep  | 121.12(19) ..... | Senseless su |
| C13 -C12 -H12       | 1.555 1.555 1.555 | #            | 20               |              |
| 752_ALERT_4_C Angle | Calc              | 117.00, Rep  | 117.3(2) .....   | Senseless su |
| C11 -C12 -H12       | 1.555 1.555 1.555 | #            | 22               |              |
| 752_ALERT_4_C Angle | Calc              | 109.00, Rep  | 109.25(18) ..... | Senseless su |
| C3 -C4 -H4A         | 1.555 1.555 1.555 | #            | 29               |              |
| 752_ALERT_4_C Angle | Calc              | 113.00, Rep  | 113.2(2) .....   | Senseless su |
| C3 -C4 -H4B         | 1.555 1.555 1.555 | #            | 30               |              |
| 752_ALERT_4_C Angle | Calc              | 113.00, Rep  | 113.35(19) ..... | Senseless su |
| C5 -C4 -H4A         | 1.555 1.555 1.555 | #            | 32               |              |
| 752_ALERT_4_C Angle | Calc              | 106.00, Rep  | 106.01(19) ..... | Senseless su |
| C5 -C4 -H4B         | 1.555 1.555 1.555 | #            | 33               |              |
| 752_ALERT_4_C Angle | Calc              | 104.00, Rep  | 104.41(17) ..... | Senseless su |
| H4A -C4 -H4B        | 1.555 1.555 1.555 | #            | 34               |              |
| 752_ALERT_4_C Angle | Calc              | 109.00, Rep  | 108.81(18) ..... | Senseless su |
| C7 -C2 -H2          | 1.555 1.555 1.555 | #            | 35               |              |
| 752_ALERT_4_C Angle | Calc              | 112.00, Rep  | 112.00(17) ..... | Senseless su |
| C3 -C2 -H2          | 1.555 1.555 1.555 | #            | 38               |              |
| 752_ALERT_4_C Angle | Calc              | 106.00, Rep  | 106.28(18) ..... | Senseless su |
| C1 -C2 -H2          | 1.555 1.555 1.555 | #            | 40               |              |
| 752_ALERT_4_C Angle | Calc              | 120.00, Rep  | 120.5(2) .....   | Senseless su |
| C15 -C16 -H16       | 1.555 1.555 1.555 | #            | 45               |              |
| 752_ALERT_4_C Angle | Calc              | 119.00, Rep  | 119.1(2) .....   | Senseless su |
| C11 -C16 -H16       | 1.555 1.555 1.555 | #            | 46               |              |
| 752_ALERT_4_C Angle | Calc              | 106.00, Rep  | 105.65(19) ..... | Senseless su |
| C8 -C7 -H7          | 1.555 1.555 1.555 | #            | 48               |              |
| 752_ALERT_4_C Angle | Calc              | 110.00, Rep  | 109.54(18) ..... | Senseless su |
| C2 -C7 -H7          | 1.555 1.555 1.555 | #            | 49               |              |
| 752_ALERT_4_C Angle | Calc              | 108.00, Rep  | 108.30(17) ..... | Senseless su |
| C11 -C7 -H7         | 1.555 1.555 1.555 | #            | 52               |              |
| 752_ALERT_4_C Angle | Calc              | 108.00, Rep  | 108.14(16) ..... | Senseless su |
| C4 -C3 -H3A         | 1.555 1.555 1.555 | #            | 54               |              |
| 752_ALERT_4_C Angle | Calc              | 114.00, Rep  | 114.42(17) ..... | Senseless su |
| C4 -C3 -H3B         | 1.555 1.555 1.555 | #            | 55               |              |
| 752_ALERT_4_C Angle | Calc              | 110.00, Rep  | 110.17(16) ..... | Senseless su |
| C2 -C3 -H3A         | 1.555 1.555 1.555 | #            | 56               |              |
| 752_ALERT_4_C Angle | Calc              | 108.00, Rep  | 108.19(17) ..... | Senseless su |
| C2 -C3 -H3B         | 1.555 1.555 1.555 | #            | 57               |              |
| 752_ALERT_4_C Angle | Calc              | 104.00, Rep  | 104.23(19) ..... | Senseless su |
| H3A -C3 -H3B        | 1.555 1.555 1.555 | #            | 58               |              |
| 752_ALERT_4_C Angle | Calc              | 108.00, Rep  | 107.82(18) ..... | Senseless su |
| N1 -C1 -H1A         | 1.555 1.555 1.555 | #            | 60               |              |
| 752_ALERT_4_C Angle | Calc              | 110.00, Rep  | 109.61(18) ..... | Senseless su |
| N1 -C1 -H1B         | 1.555 1.555 1.555 | #            | 61               |              |
| 752_ALERT_4_C Angle | Calc              | 110.00, Rep  | 110.10(17) ..... | Senseless su |
| C2 -C1 -H1A         | 1.555 1.555 1.555 | #            | 62               |              |
| 752_ALERT_4_C Angle | Calc              | 114.00, Rep  | 113.52(18) ..... | Senseless su |
| C2 -C1 -H1B         | 1.555 1.555 1.555 | #            | 63               |              |
| 752_ALERT_4_C Angle | Calc              | 104.00, Rep  | 104.35(16) ..... | Senseless su |
| H1A -C1 -H1B        | 1.555 1.555 1.555 | #            | 64               |              |
| 752_ALERT_4_C Angle | Calc              | 110.00, Rep  | 109.58(19) ..... | Senseless su |
| N1 -C5 -H5A         | 1.555 1.555 1.555 | #            | 66               |              |
| 752_ALERT_4_C Angle | Calc              | 110.00, Rep  | 109.65(19) ..... | Senseless su |
| N1 -C5 -H5B         | 1.555 1.555 1.555 | #            | 67               |              |
| 752_ALERT_4_C Angle | Calc              | 113.00, Rep  | 113.39(19) ..... | Senseless su |
| C4 -C5 -H5A         | 1.555 1.555 1.555 | #            | 68               |              |
| 752_ALERT_4_C Angle | Calc              | 110.00, Rep  | 110.19(18) ..... | Senseless su |
| C4 -C5 -H5B         | 1.555 1.555 1.555 | #            | 69               |              |
| 752_ALERT_4_C Angle | Calc              | 104.00, Rep  | 104.13(17) ..... | Senseless su |
| H5A -C5 -H5B        | 1.555 1.555 1.555 | #            | 70               |              |
| 752_ALERT_4_C Angle | Calc              | 112.00, Rep  | 111.72(18) ..... | Senseless su |
| O2 -C9 -H9A         | 1.555 1.555 1.555 | #            | 71               |              |

```

752_ALERT_4_C Angle Calc 108.00, Rep 107.89(17) ..... Senseless su
O2 -C9 -H9B 1.555 1.555 1.555 # 72
752_ALERT_4_C Angle Calc 109.00, Rep 109.19(17) ..... Senseless su
O2 -C9 -H9C 1.555 1.555 1.555 # 73
752_ALERT_4_C Angle Calc 109.00, Rep 109.33(17) ..... Senseless su
H9A -C9 -H9B 1.555 1.555 1.555 # 74
752_ALERT_4_C Angle Calc 109.00, Rep 109.37(17) ..... Senseless su
H9A -C9 -H9C 1.555 1.555 1.555 # 75
752_ALERT_4_C Angle Calc 109.00, Rep 109.29(18) ..... Senseless su
H9B -C9 -H9C 1.555 1.555 1.555 # 76
911_ALERT_3_C Missing # FCF Refl Between THmin & STh/L= 0.600 2 Why ?
#=====
002_ALERT_2_G Number of Distance or Angle Restraints on AtSite 26 Note
760_ALERT_1_G CIF Contains no Torsion Angles ..... ? Info
791_ALERT_4_G The Model has Chirality at C2 ..... R Verify
791_ALERT_4_G The Model has Chirality at C7 ..... R Verify
795_ALERT_4_G C-Atom in CIF Coordinate List out of Sequence .. C8 Note
860_ALERT_3_G Number of Least-Squares Restraints ..... 60 Note
910_ALERT_3_G Missing # of FCF Reflections Below Th(Min) ..... 1 Why ?
#=====

```

ALERT\_Level and ALERT\_Type Summary

```

=====
58 ALERT_Level_C = Check. Ensure it is Not caused by an Omission or Oversight
7 ALERT_Level_G = General Info/Check that it is not Something Unexpected

```

```

1 ALERT_Type_1 CIF Construction/Syntax Error, Inconsistent or Missing Data.
1 ALERT_Type_2 Indicator that the Structure Model may be Wrong or Deficient.
3 ALERT_Type_3 Indicator that the Structure Quality may be Low.
60 ALERT_Type_4 Improvement, Methodology, Query or Suggestion.
#=====

```

```

0 Missing Experimental Info Issue(s) (Out of 54 Tests) - 100 % Satisfied
0 Experimental Data Related Issue(s) (Out of 28 Tests) - 100 % Satisfied
2 Structural Model Related Issue(s) (Out of 117 Tests) - 98 % Satisfied
63 Unresolved or to be Checked Issue(s) (Out of 223 Tests) - 72 % Satisfied
#=====

```

## 10.4. X-Ray Crystallographic Data for 13b

### Crystal Data and Experimental

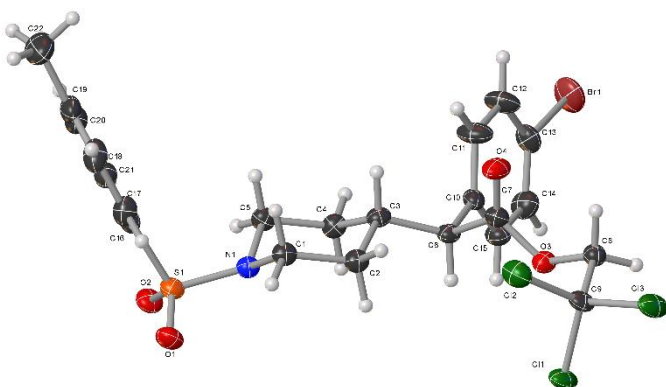

**Experimental.** Single colourless prism-shaped crystals of **WL-N9-80-f34** were chosen from the sample as supplied. A suitable crystal  $0.35 \times 0.21 \times 0.11 \text{ mm}^3$  was selected and mounted on a loop with paratone oil on an XtaLAB Synergy-S diffractometer. The crystal was kept at a steady  $T = 100.01(10) \text{ K}$  during data collection. The structure was solved with the **ShelXT** (Sheldrick, 2015) structure solution program using the Intrinsic Phasing solution method and by using **Olex2** (Dolomanov et al., 2009) as the graphical interface. The model was refined with version 2018/3 of **ShelXL** (Sheldrick, 2015) using Least Squares minimisation.

**Crystal Data.**  $\text{C}_{22}\text{H}_{23}\text{BrCl}_3\text{NO}_4\text{S}$ ,  $M_r = 583.73$ , orthorhombic,  $P2_12_12_1$  (No. 19),  $a = 5.60602(6) \text{ \AA}$ ,  $b = 20.3318(2) \text{ \AA}$ ,  $c = 21.4309(2) \text{ \AA}$ ,  $a = b = g = 90^\circ$ ,  $V = 2442.71(4) \text{ \AA}^3$ ,  $T = 100.01(10) \text{ K}$ ,  $Z = 4$ ,  $Z' = 1$ ,  $m(\text{CuK}\alpha) = 6.365 \text{ mm}^{-1}$ , 24631 reflections measured, 4842 unique ( $R_{int} = 0.0422$ ) which were used in all calculations. The final  $wR_2$  was 0.0855 (all data) and  $R_1$  was 0.0326 ( $I > 2\sigma(I)$ ).

| Compound                          | WL-N9-80-f34                                                 |
|-----------------------------------|--------------------------------------------------------------|
| Formula                           | $\text{C}_{22}\text{H}_{23}\text{BrCl}_3\text{NO}_4\text{S}$ |
| $D_{calc.}/ \text{g cm}^{-3}$     | 1.587                                                        |
| $m/\text{mm}^{-1}$                | 6.365                                                        |
| Formula Weight                    | 583.73                                                       |
| Colour                            | colourless                                                   |
| Shape                             | prism                                                        |
| Size/ $\text{mm}^3$               | $0.35 \times 0.21 \times 0.11$                               |
| $T/\text{K}$                      | 100.01(10)                                                   |
| Crystal System                    | orthorhombic                                                 |
| Flack Parameter                   | -0.001(8)                                                    |
| Hooft Parameter                   | -0.007(6)                                                    |
| Space Group                       | $P2_12_12_1$                                                 |
| $a/\text{\AA}$                    | 5.60602(6)                                                   |
| $b/\text{\AA}$                    | 20.3318(2)                                                   |
| $c/\text{\AA}$                    | 21.4309(2)                                                   |
| $a^\circ$                         | 90                                                           |
| $b^\circ$                         | 90                                                           |
| $g^\circ$                         | 90                                                           |
| $V/\text{\AA}^3$                  | 2442.71(4)                                                   |
| $Z$                               | 4                                                            |
| $Z'$                              | 1                                                            |
| Wavelength/ $\text{\AA}$          | 1.54184                                                      |
| Radiation type                    | $\text{CuK}\alpha$                                           |
| $Q_{min}^\circ$                   | 2.996                                                        |
| $Q_{max}^\circ$                   | 77.056                                                       |
| Measured Refl.                    | 24631                                                        |
| Independent Refl.                 | 4842                                                         |
| Reflections with $I > 2\sigma(I)$ | 4758                                                         |
| $R_{int}$                         | 0.0422                                                       |
| Parameters                        | 290                                                          |
| Restraints                        | 12                                                           |
| Largest Peak                      | 0.675                                                        |
| Deepest Hole                      | -0.722                                                       |
| GooF                              | 1.057                                                        |
| $wR_2$ (all data)                 | 0.0855                                                       |
| $wR_2$                            | 0.0851                                                       |
| $R_1$ (all data)                  | 0.0335                                                       |
| $R_1$                             | 0.0326                                                       |

## Structure Quality Indicators

|                     |                 |                  |               |                           |               |
|---------------------|-----------------|------------------|---------------|---------------------------|---------------|
| <b>Reflections:</b> | d min (Cu) 0.79 | I/ $\sigma$ 39.7 | Rint 4.22%    | complete 100% (IUCr) 100% |               |
| <b>Refinement:</b>  | Shift -0.004    | Max Peak 0.7     | Min Peak -0.7 | Goof 1.057                | Flack .001(8) |

A colourless prism-shaped crystal with dimensions 0.35×0.21×0.11 mm<sup>3</sup> was mounted on a loop with paratone oil. Data were collected using an XtaLAB Synergy, Dualflex, HyPix diffractometer equipped with an Oxford Cryosystems low-temperature device operating at  $T = 100.01(10)$  K.

Data were measured using  $\omega$  scans using CuK $\alpha$  radiation. The total number of runs and images was based on the strategy calculation from the program **CrysAlisPro** (Rigaku, V1.171.40.37a, 2019). The maximum resolution that was achieved was  $Q = 77.056^\circ$  (0.79 Å).

The diffraction pattern was indexed and then the total number of runs and images was calculated from the program **CrysAlisPro** (Rigaku, V1.171.40.37a, 2019). The unit cell was refined using **CrysAlisPro** (Rigaku, V1.171.40.37a, 2019) on 20665 reflections, 84% of the observed reflections.

Data reduction, scaling and absorption corrections were performed using **CrysAlisPro** (Rigaku, V1.171.40.37a, 2019). The final completeness is 100.00 % out to  $77.056^\circ$  in  $Q$ . A numerical absorption correction based on Gaussian integration over a multifaceted crystal model was performed using (Rigaku Oxford Diffraction, 2019). An empirical absorption correction using spherical harmonics as implemented in SCALE3 ABSPACK was also performed. The absorption coefficient  $m$  of this material is 6.365 mm<sup>-1</sup> at this wavelength ( $\lambda = 1.542\text{Å}$ ) and the minimum and maximum transmissions are 0.158 and 0.975.

The structure was solved and the space group  $P2_12_12_1$  (# 19) determined by the **ShelXT** (Sheldrick, 2015) structure solution program using Intrinsic Phasing and refined by Least Squares using version 2018/3 of **ShelXL** (Sheldrick, 2015). All non-hydrogen atoms were refined anisotropically. Hydrogen atom positions were calculated geometrically and refined using the riding model. Hydrogen atom positions were calculated geometrically and refined using the riding model.

There is a single molecule in the asymmetric unit, which is represented by the reported sum formula. In other words: Z is 4 and Z' is 1.

The Flack parameter was refined to -0.001(8). Determination of absolute structure using Bayesian statistics on Bijvoet differences using the Olex2 results in -0.007(6). Note: The Flack parameter is used to determine chirality of the crystal studied, the value should be near 0, a value of 1 means that the stereochemistry is wrong and the model should be inverted. A value of 0.5 means that the crystal consists of a racemic mixture of the two enantiomers.

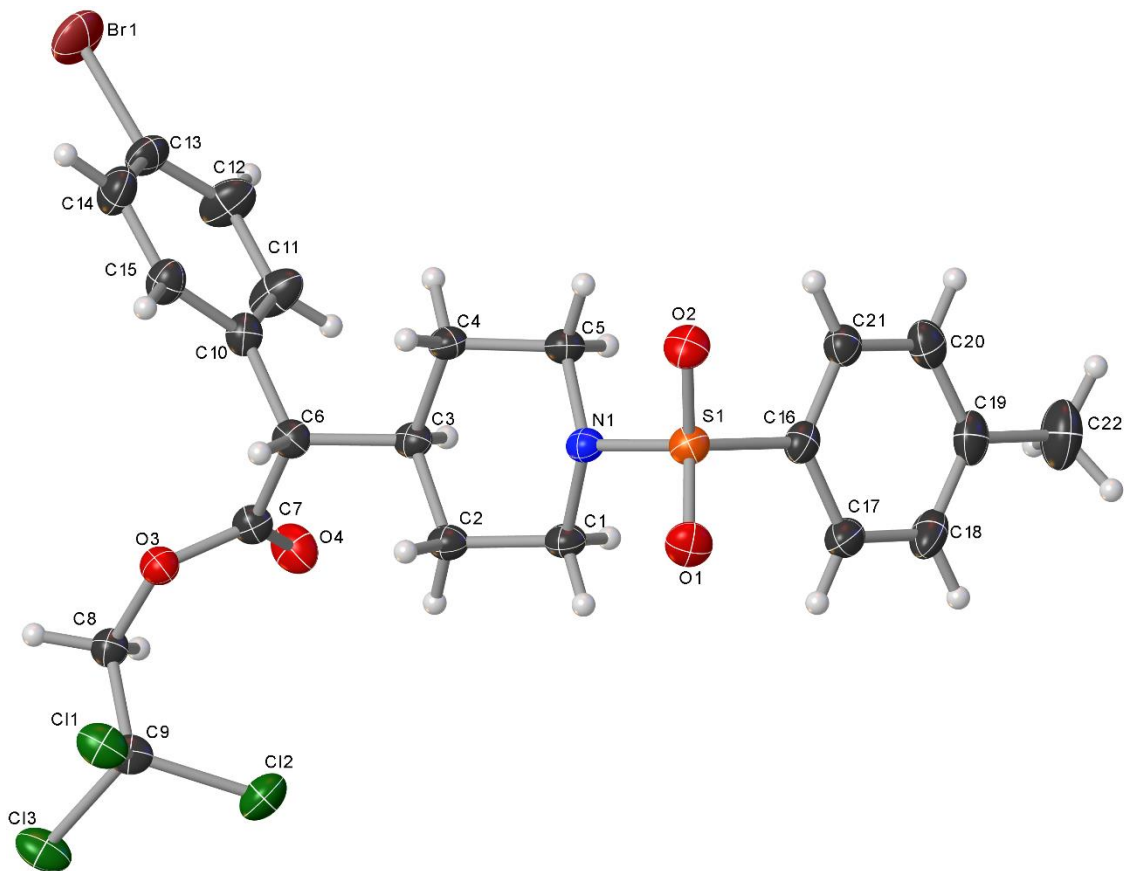

Figure 1:

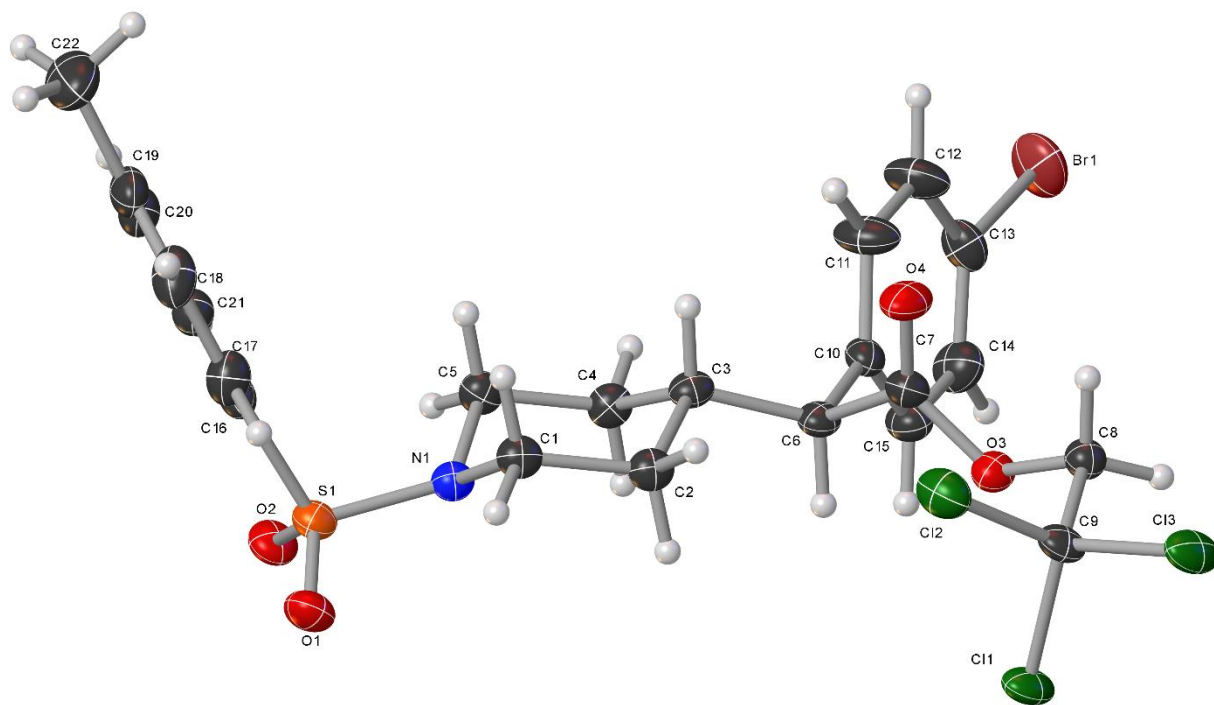

Figure 2:

## Data Plots: Diffraction Data

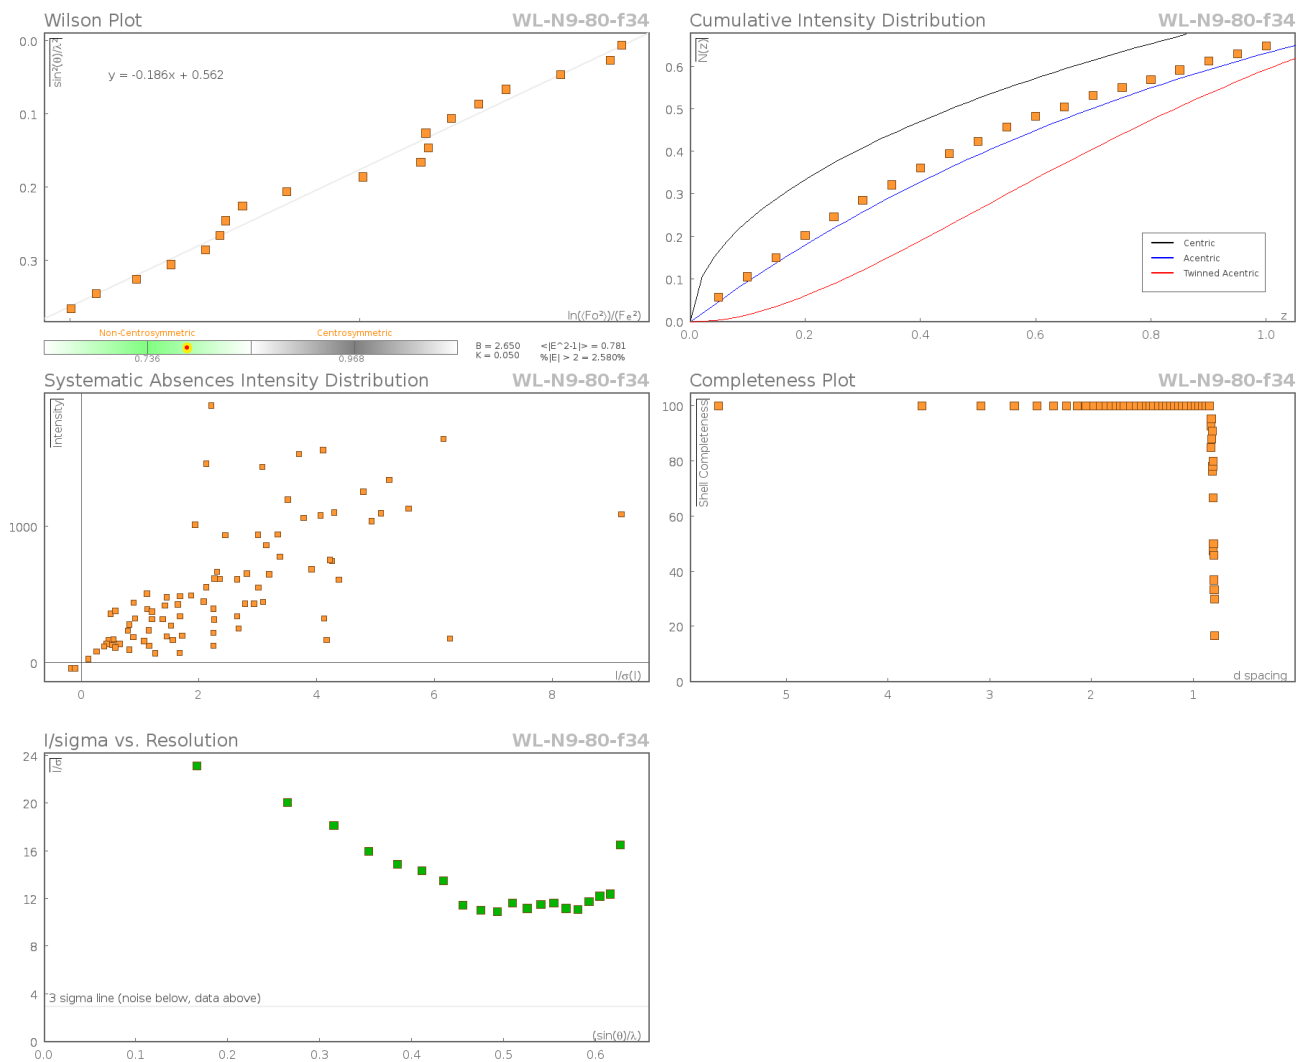

## Data Plots: Refinement and Data

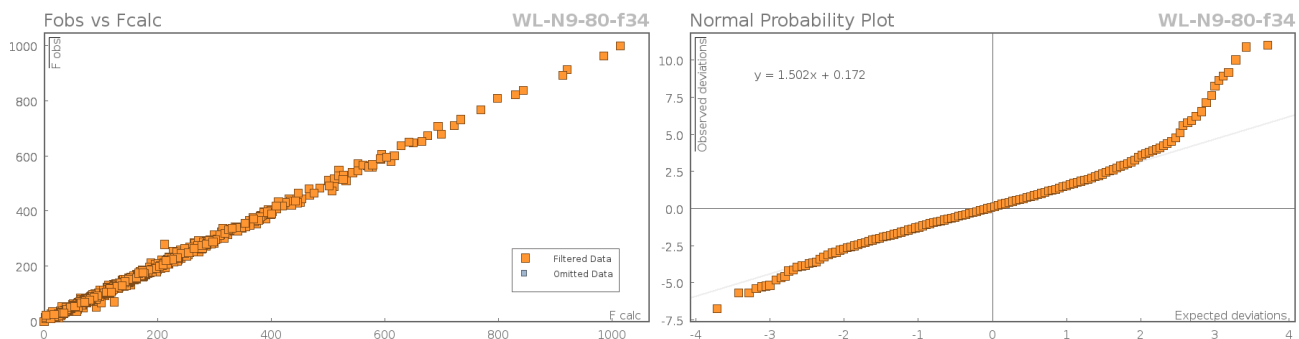

## Reflection Statistics

|                                     |             |                                |                |
|-------------------------------------|-------------|--------------------------------|----------------|
| Total reflections (after filtering) | 24719       | Unique reflections             | 4842           |
| Completeness                        | 0.94        | Mean I/s                       | 28.61          |
| hkl <sub>max</sub> collected        | (6, 22, 26) | hkl <sub>min</sub> collected   | (-6, -25, -25) |
| hkl <sub>max</sub> used             | (6, 25, 26) | hkl <sub>min</sub> used        | (-6, 0, 0)     |
| Lim d <sub>max</sub> collected      | 100.0       | Lim d <sub>min</sub> collected | 0.77           |
| d <sub>max</sub> used               | 14.75       | d <sub>min</sub> used          | 0.79           |
| Friedel pairs                       | 2903        | Friedel pairs merged           | 0              |

|                             |                                                 |                            |        |
|-----------------------------|-------------------------------------------------|----------------------------|--------|
| Inconsistent equivalents    | 16                                              | R <sub>int</sub>           | 0.0422 |
| R <sub>sigma</sub>          | 0.0252                                          | Intensity transformed      | 0      |
| Omitted reflections         | 0                                               | Omitted by user (OMIT hkl) | 0      |
| Multiplicity                | (4573, 3499, 1890, 963, 416,<br>172, 56, 13, 2) | Maximum multiplicity       | 16     |
| Removed systematic absences | 88                                              | Filtered off (Shel/OMIT)   | 0      |

### Images of the Crystal on the Diffractometer

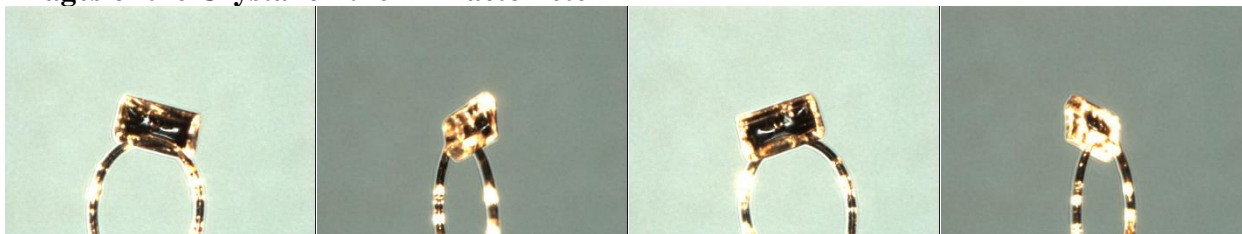

**Table 1:** Fractional Atomic Coordinates ( $\times 10^4$ ) and Equivalent Isotropic Displacement Parameters ( $\text{\AA}^2 \times 10^3$ ) for **WL-N9-80-f34**.  $U_{eq}$  is defined as 1/3 of the trace of the orthogonalised  $U_{ij}$ .

| Atom | x          | y          | z          | $U_{eq}$  |
|------|------------|------------|------------|-----------|
| Br1  | 2801.8(11) | 1784.5(2)  | 4307.8(3)  | 49.52(16) |
| C1   | 6633(7)    | 6324.1(18) | 4797.0(17) | 24.8(7)   |
| C2   | 6167(7)    | 5869.2(18) | 4242.4(18) | 25.2(7)   |
| C3   | 5315(7)    | 5184.6(18) | 4444.8(16) | 22.5(7)   |
| C4   | 7009(7)    | 4906.9(17) | 4939.5(16) | 24.8(8)   |
| C5   | 7411(7)    | 5382.3(17) | 5473.4(16) | 25.3(7)   |
| C6   | 5239(7)    | 4718.2(18) | 3879.1(17) | 22.6(7)   |
| C7   | 3332(7)    | 4912.0(18) | 3407.4(18) | 24.8(8)   |
| C8   | 2607(7)    | 4960.3(17) | 2306.5(16) | 23.9(7)   |
| C9   | 3411(7)    | 5610.5(19) | 2020.5(18) | 25.9(8)   |
| C10  | 4745(7)    | 3992.7(19) | 4029.2(17) | 24.2(7)   |
| C11  | 2689(8)    | 3809(2)    | 4339(2)    | 38.7(10)  |
| C12  | 2144(8)    | 3148(2)    | 4433(2)    | 40.3(10)  |
| C13  | 3686(8)    | 2680.8(18) | 4212(2)    | 31.1(9)   |
| C14  | 5814(9)    | 2844(2)    | 3932(2)    | 36.6(10)  |
| C15  | 6298(7)    | 3507(2)    | 3837.6(19) | 29.3(8)   |
| C16  | 7868(7)    | 6777.2(18) | 6246.6(17) | 25.3(7)   |
| C17  | 6642(8)    | 7360(2)    | 6117.9(19) | 31.8(9)   |
| C18  | 4942(9)    | 7578(2)    | 6537(2)    | 37.0(10)  |
| C19  | 4397(8)    | 7229(2)    | 7076(2)    | 34.5(9)   |
| C20  | 5640(8)    | 6651(2)    | 7192.3(19) | 34.2(10)  |
| C21  | 7353(8)    | 6420.8(19) | 6782.5(17) | 27.7(8)   |
| C22  | 2503(10)   | 7463(3)    | 7523(2)    | 54.5(14)  |
| Cl1  | 6532.4(16) | 5608.4(5)  | 1900.9(4)  | 31.8(2)   |
| Cl3  | 1966.4(16) | 5695.7(6)  | 1286.8(4)  | 35.6(2)   |
| Cl2  | 2634.7(19) | 6285.6(4)  | 2500.5(5)  | 35.7(2)   |
| N1   | 8391(6)    | 6000.3(14) | 5214.8(14) | 22.0(6)   |
| O1   | 10817(5)   | 7001.9(14) | 5336.0(14) | 32.3(6)   |
| O2   | 11531(5)   | 6036.9(14) | 6019.9(13) | 29.8(6)   |
| O3   | 4142(5)    | 4807.2(13) | 2820.3(12) | 24.3(5)   |
| O4   | 1346(5)    | 5097.9(16) | 3531.3(14) | 33.8(7)   |
| S1   | 9909.2(16) | 6464.1(4)  | 5693.8(4)  | 24.63(19) |

**Table 2:** Anisotropic Displacement Parameters ( $\times 10^4$ ) **WL-N9-80-f34**. The anisotropic displacement factor exponent takes the form:  $-2p^2[h^2a^{*2} \times U_{11} + \dots + 2hka^* \times b^* \times U_{12}]$

| Atom | $U_{11}$ | $U_{22}$ | $U_{33}$ | $U_{23}$ | $U_{13}$ | $U_{12}$ |
|------|----------|----------|----------|----------|----------|----------|
| Br1  | 59.0(3)  | 26.0(2)  | 63.6(3)  | -7.0(2)  | -3.3(3)  | -13.6(2) |



| Atom | $U_{11}$ | $U_{22}$ | $U_{33}$ | $U_{23}$  | $U_{13}$ | $U_{12}$ |
|------|----------|----------|----------|-----------|----------|----------|
| C1   | 24.1(18) | 23.4(14) | 27.0(14) | 4.0(12)   | -1.1(13) | 3.9(14)  |
| C2   | 24.0(17) | 24.9(12) | 26.6(14) | 3.6(11)   | -0.4(12) | 3.3(11)  |
| C3   | 18.6(16) | 23.9(13) | 24.9(17) | 1.9(12)   | 2.9(13)  | 5.4(11)  |
| C4   | 28(2)    | 20.6(16) | 25.9(17) | 3.0(14)   | -0.2(15) | 3.5(16)  |
| C5   | 27.2(18) | 23.2(12) | 25.3(16) | 3.3(11)   | -0.4(14) | 0.4(12)  |
| C6   | 15.3(16) | 27.0(18) | 25.6(17) | 0.0(14)   | 1.6(14)  | 2.7(14)  |
| C7   | 20.7(18) | 26.0(18) | 27.8(18) | 0.8(15)   | 1.5(15)  | -2.2(15) |
| C8   | 21.0(18) | 25.0(17) | 25.7(17) | -1.1(13)  | -0.6(14) | 1.2(15)  |
| C9   | 14.2(16) | 31.6(19) | 31.8(18) | 4.0(16)   | -2.6(14) | 0.3(15)  |
| C10  | 17.1(14) | 28.3(18) | 27.2(16) | -4.6(14)  | -0.3(12) | -0.4(13) |
| C11  | 25.7(15) | 29.0(18) | 62(2)    | 2.2(18)   | 17.1(17) | 3.5(14)  |
| C12  | 29(2)    | 30(2)    | 62(3)    | 5.3(19)   | 12(2)    | -5.0(18) |
| C13  | 34(2)    | 19.7(17) | 39(2)    | -0.8(16)  | -5.3(18) | -4.4(16) |
| C14  | 41(2)    | 29(2)    | 40(2)    | -7.6(19)  | 6.0(19)  | 3.4(19)  |
| C15  | 25(2)    | 29.2(19) | 34(2)    | -4.2(17)  | 5.6(16)  | -0.1(16) |
| C16  | 21.4(18) | 25.5(17) | 28.9(17) | -6.1(14)  | -5.1(15) | 2.1(16)  |
| C17  | 39(2)    | 26.1(19) | 30.3(19) | -1.4(15)  | -5.1(17) | 4.5(17)  |
| C18  | 38(2)    | 33(2)    | 41(2)    | -12.6(18) | -11(2)   | 15(2)    |
| C19  | 31(2)    | 40(2)    | 33(2)    | -15.2(18) | -2.3(17) | -1.1(19) |
| C20  | 37(2)    | 39(2)    | 26.9(19) | -5.7(17)  | -1.3(17) | -4.7(19) |
| C21  | 27(2)    | 28.8(18) | 27.2(17) | -3.2(15)  | -2.4(15) | 2.0(17)  |
| C22  | 47(3)    | 63(3)    | 54(3)    | -26(3)    | 8(3)     | 4(3)     |
| Cl1  | 14.4(4)  | 46.4(5)  | 34.6(5)  | 6.4(4)    | -1.4(3)  | -0.9(4)  |
| Cl3  | 18.9(4)  | 54.6(6)  | 33.2(4)  | 12.0(4)   | -6.5(4)  | 0.4(4)   |
| Cl2  | 31.5(5)  | 24.6(4)  | 50.9(6)  | -3.6(4)   | 1.8(5)   | 1.9(4)   |
| N1   | 20.3(15) | 21.5(12) | 24.2(14) | 1.9(10)   | 0.4(11)  | 3.2(11)  |
| O1   | 26.8(15) | 33.1(15) | 37.1(15) | 2.7(12)   | 2.7(12)  | -7.6(12) |
| O2   | 17.6(13) | 35.1(14) | 36.8(14) | 0.4(12)   | -4.6(11) | 6.2(11)  |
| O3   | 20.0(12) | 26.7(13) | 26.3(13) | 0.2(10)   | -0.1(10) | 4.5(11)  |
| O4   | 18.2(14) | 50.2(18) | 32.8(15) | 0.1(13)   | 3.8(11)  | 5.9(13)  |
| S1   | 18.5(4)  | 26.3(4)  | 29.1(4)  | 0.6(4)    | -0.2(4)  | 0.8(3)   |

**Table 3:** Bond Lengths in Å for **WL-N9-80-f34**.

| Atom | Atom | Length/Å | Atom | Atom | Length/Å |
|------|------|----------|------|------|----------|
| Br1  | C13  | 1.900(4) | C10  | C11  | 1.381(6) |
| C1   | C2   | 1.528(5) | C10  | C15  | 1.379(5) |
| C1   | N1   | 1.486(5) | C11  | C12  | 1.394(6) |
| C2   | C3   | 1.534(5) | C12  | C13  | 1.369(6) |
| C3   | C4   | 1.531(5) | C13  | C14  | 1.376(6) |
| C3   | C6   | 1.540(5) | C14  | C15  | 1.390(6) |
| C4   | C5   | 1.515(5) | C16  | C17  | 1.398(5) |
| C5   | N1   | 1.479(5) | C16  | C21  | 1.388(5) |
| C6   | C7   | 1.523(5) | C16  | S1   | 1.766(4) |
| C6   | C10  | 1.535(5) | C17  | C18  | 1.382(6) |
| C7   | O3   | 1.355(5) | C18  | C19  | 1.391(7) |
| C7   | O4   | 1.205(5) | C19  | C20  | 1.389(7) |
| C8   | C9   | 1.525(5) | C19  | C22  | 1.507(6) |
| C8   | O3   | 1.432(4) | C20  | C21  | 1.383(6) |
| C9   | Cl1  | 1.769(4) | N1   | S1   | 1.633(3) |
| C9   | Cl3  | 1.777(4) | O1   | S1   | 1.429(3) |
| C9   | Cl2  | 1.770(4) | O2   | S1   | 1.438(3) |

**Table 4:** Bond Angles in ° for **WL-N9-80-f34**.

| Atom | Atom | Atom | Angle/°  | Atom | Atom | Atom | Angle/°    |
|------|------|------|----------|------|------|------|------------|
| N1   | C1   | C2   | 108.3(3) | C12  | C13  | Br1  | 117.6(3)   |
| C1   | C2   | C3   | 112.5(3) | C12  | C13  | C14  | 122.0(4)   |
| C2   | C3   | C6   | 110.2(3) | C14  | C13  | Br1  | 120.3(3)   |
| C4   | C3   | C2   | 109.7(3) | C13  | C14  | C15  | 117.8(4)   |
| C4   | C3   | C6   | 109.6(3) | C10  | C15  | C14  | 121.8(4)   |
| C5   | C4   | C3   | 112.3(3) | C17  | C16  | S1   | 119.5(3)   |
| N1   | C5   | C4   | 108.3(3) | C21  | C16  | C17  | 120.2(4)   |
| C7   | C6   | C3   | 112.5(3) | C21  | C16  | S1   | 120.1(3)   |
| C7   | C6   | C10  | 105.1(3) | C18  | C17  | C16  | 118.8(4)   |
| C10  | C6   | C3   | 115.6(3) | C17  | C18  | C19  | 121.9(4)   |
| O3   | C7   | C6   | 109.9(3) | C18  | C19  | C22  | 121.5(4)   |
| O4   | C7   | C6   | 125.7(4) | C20  | C19  | C18  | 118.0(4)   |
| O4   | C7   | O3   | 124.3(4) | C20  | C19  | C22  | 120.4(5)   |
| O3   | C8   | C9   | 108.7(3) | C21  | C20  | C19  | 121.4(4)   |
| C8   | C9   | C11  | 110.4(3) | C20  | C21  | C16  | 119.5(4)   |
| C8   | C9   | C13  | 107.8(3) | C1   | N1   | S1   | 118.0(2)   |
| C8   | C9   | C12  | 111.5(3) | C5   | N1   | C1   | 110.8(3)   |
| C11  | C9   | C13  | 108.8(2) | C5   | N1   | S1   | 116.7(2)   |
| C11  | C9   | C12  | 109.2(2) | C7   | O3   | C8   | 118.6(3)   |
| C12  | C9   | C13  | 109.1(2) | N1   | S1   | C16  | 107.00(17) |
| C11  | C10  | C6   | 120.7(3) | O1   | S1   | C16  | 108.36(18) |
| C15  | C10  | C6   | 120.8(3) | O1   | S1   | N1   | 106.86(17) |
| C15  | C10  | C11  | 118.5(4) | O1   | S1   | O2   | 119.84(18) |
| C10  | C11  | C12  | 120.9(4) | O2   | S1   | C16  | 107.54(18) |
| C13  | C12  | C11  | 118.8(4) | O2   | S1   | N1   | 106.62(17) |

**Table 5:** Torsion Angles in ° for **WL-N9-80-f34**.

| Atom | Atom | Atom | Atom | Angle/°   |
|------|------|------|------|-----------|
| Br1  | C13  | C14  | C15  | 175.8(3)  |
| C1   | C2   | C3   | C4   | -50.8(4)  |
| C1   | C2   | C3   | C6   | -171.5(3) |
| C1   | N1   | S1   | C16  | 67.6(3)   |
| C1   | N1   | S1   | O1   | -48.3(3)  |
| C1   | N1   | S1   | O2   | -177.6(3) |
| C2   | C1   | N1   | C5   | -63.4(4)  |
| C2   | C1   | N1   | S1   | 158.5(3)  |
| C2   | C3   | C4   | C5   | 51.7(4)   |
| C2   | C3   | C6   | C7   | -67.2(4)  |
| C2   | C3   | C6   | C10  | 172.0(3)  |
| C3   | C4   | C5   | N1   | -58.3(4)  |
| C3   | C6   | C7   | O3   | 142.4(3)  |
| C3   | C6   | C7   | O4   | -41.3(5)  |
| C3   | C6   | C10  | C11  | 58.2(5)   |
| C3   | C6   | C10  | C15  | -124.3(4) |
| C4   | C3   | C6   | C7   | 172.0(3)  |
| C4   | C3   | C6   | C10  | 51.2(4)   |
| C4   | C5   | N1   | C1   | 64.4(4)   |
| C4   | C5   | N1   | S1   | -156.8(3) |
| C5   | N1   | S1   | C16  | -68.2(3)  |
| C5   | N1   | S1   | O1   | 175.9(3)  |
| C5   | N1   | S1   | O2   | 46.6(3)   |
| C6   | C3   | C4   | C5   | 172.8(3)  |
| C6   | C7   | O3   | C8   | -179.9(3) |
| C6   | C10  | C11  | C12  | 175.0(4)  |
| C6   | C10  | C15  | C14  | -175.8(4) |

| Atom | Atom | Atom | Atom | Angle/°   |
|------|------|------|------|-----------|
| C7   | C6   | C10  | C11  | -66.5(5)  |
| C7   | C6   | C10  | C15  | 111.0(4)  |
| C9   | C8   | O3   | C7   | 102.7(4)  |
| C10  | C6   | C7   | O3   | -91.0(3)  |
| C10  | C6   | C7   | O4   | 85.3(5)   |
| C10  | C11  | C12  | C13  | -0.1(8)   |
| C11  | C10  | C15  | C14  | 1.8(6)    |
| C11  | C12  | C13  | Br1  | -176.5(4) |
| C11  | C12  | C13  | C14  | 3.7(7)    |
| C12  | C13  | C14  | C15  | -4.4(7)   |
| C13  | C14  | C15  | C10  | 1.6(7)    |
| C15  | C10  | C11  | C12  | -2.6(7)   |
| C16  | C17  | C18  | C19  | -0.9(7)   |
| C17  | C16  | C21  | C20  | -0.8(6)   |
| C17  | C16  | S1   | N1   | -87.6(3)  |
| C17  | C16  | S1   | O1   | 27.3(4)   |
| C17  | C16  | S1   | O2   | 158.1(3)  |
| C17  | C18  | C19  | C20  | 0.8(7)    |
| C17  | C18  | C19  | C22  | -178.6(4) |
| C18  | C19  | C20  | C21  | -0.7(6)   |
| C19  | C20  | C21  | C16  | 0.7(6)    |
| C21  | C16  | C17  | C18  | 0.9(6)    |
| C21  | C16  | S1   | N1   | 87.5(3)   |
| C21  | C16  | S1   | O1   | -157.6(3) |
| C21  | C16  | S1   | O2   | -26.7(4)  |
| C22  | C19  | C20  | C21  | 178.7(4)  |
| N1   | C1   | C2   | C3   | 56.4(4)   |
| O3   | C8   | C9   | C11  | 47.9(3)   |
| O3   | C8   | C9   | C13  | 166.7(2)  |
| O3   | C8   | C9   | C12  | -73.7(3)  |
| O4   | C7   | O3   | C8   | 3.7(6)    |
| S1   | C16  | C17  | C18  | 176.0(3)  |
| S1   | C16  | C21  | C20  | -175.9(3) |

**Table 6:** Hydrogen Fractional Atomic Coordinates ( $\times 10^4$ ) and Equivalent Isotropic Displacement Parameters ( $\text{\AA}^2 \times 10^3$ ) for **WL-N9-80-f34**.  $U_{eq}$  is defined as 1/3 of the trace of the orthogonalised  $U_{ij}$ .

| Atom | x       | y       | z       | $U_{eq}$ |
|------|---------|---------|---------|----------|
| H1A  | 7255.43 | 6742.14 | 4651.97 | 30       |
| H1B  | 5158.82 | 6405.53 | 5021.04 | 30       |
| H2A  | 7622    | 5824.44 | 4001.22 | 30       |
| H2B  | 4968.63 | 6066.72 | 3974.96 | 30       |
| H3   | 3710.53 | 5220.95 | 4622.86 | 27       |
| H4A  | 6350.34 | 4500.53 | 5102.61 | 30       |
| H4B  | 8529.19 | 4805.18 | 4746.22 | 30       |
| H5A  | 5915.99 | 5469.06 | 5686.06 | 30       |
| H5B  | 8519.72 | 5194.75 | 5771.77 | 30       |
| H6   | 6789.61 | 4742.76 | 3669.28 | 27       |
| H8A  | 970.9   | 4996.29 | 2449.79 | 29       |
| H8B  | 2685.81 | 4613.49 | 1996.42 | 29       |
| H11  | 1653.94 | 4131.43 | 4485.7  | 46       |
| H12  | 759.22  | 3026.49 | 4642.13 | 48       |
| H14  | 6892.78 | 2521.31 | 3810.52 | 44       |
| H15  | 7708.63 | 3626.63 | 3639.39 | 35       |
| H17  | 6965.32 | 7597.88 | 5756.69 | 38       |
| H18  | 4139.21 | 7968.83 | 6455.13 | 44       |
| H20  | 5312.28 | 6413.43 | 7553.11 | 41       |
| H21  | 8155.34 | 6030.09 | 6865.49 | 33       |
| H22A | 2752.47 | 7263.5  | 7924.14 | 82       |
| H22B | 959.11  | 7340.46 | 7367.64 | 82       |
| H22C | 2589.51 | 7932.25 | 7562.54 | 82       |

### Citations

CrysAlisPro Software System, Rigaku Oxford Diffraction, (2019).

O.V. Dolomanov and L.J. Bourhis and R.J. Gildea and J.A.K. Howard and H. Puschmann, Olex2: A complete structure solution, refinement and analysis program, *J. Appl. Cryst.*, (2009), **42**, 339-341.

Sheldrick, G.M., Crystal structure refinement with ShelXL, *Acta Cryst.*, (2015), **C27**, 3-8.

Sheldrick, G.M., ShelXT-Integrated space-group and crystal-structure determination, *Acta Cryst.*, (2015), **A71**, 3-8.

```

#=====
# PLATON/CHECK-( 70414) versus check.def version of 310314 for Entry: wl-n9-80
# Data: WL-N9-80-f34.cif - Type: CIF          Bond Precision C-C = 0.0057 A
# Refl: WL-N9-80-f34.fcf - Type: LIST4          Temp = 100 K
#
# X-Ray      Nref/Npar = 9.9
# Cell 5.60602(6) 20.3318(2) 21.4309(2)    90    90    90
# Wavelength 1.54184 Volume Reported 2442.71(4) Calculated 2442.70(4)
# SpaceGroup from Symmetry P 21 21 21 Hall: P 2ac 2ab orthorhombic
# Reported P 21 21 21 P 2ac 2ab orthorhombic
# MoietyFormula C22 H23 Br Cl3 N O4 S
# Reported C22 H23 Br Cl3 N O4 S
# SumFormula C22 H23 Br Cl3 N O4 S
# Reported C22 H23 Br Cl3 N O4 S
# Mr = 583.73[Calc], 583.73[Rep]
# Dx,gcm-3 = 1.587[Calc], 1.587[Rep]
# Z = 4[Calc], 4[Rep]
# Mu (mm-1) = 6.365[Calc], 6.365[Rep]
# F000 = 1184.0[Calc], 1184.0[Rep] or F000' = 1189.49[Calc]
# Reported T Limits: Tmin=0.158 Tmax=0.975 AbsCorr=GAUSSIAN
# Calculated T Limits: Tmin=0.257 Tmin'=0.086 Tmax=0.497
# Reported Hmax= 6, Kmax= 25, Lmax= 26, Nref= 4842 , Th(max)= 77.056
# Obs in FCF Hmax= 6, Kmax= 25, Lmax= 26, Nref= 4842[ 2864], Th(max)= 77.055
# Calculated Hmax= 7, Kmax= 25, Lmax= 27, Nref= 5151[ 2982], Ratio=1.62/0.94
# Reported Rho(min) = -0.72, Rho(max) = 0.68 e/Ang**3 (From CIF)
# Calculated Rho(min) = -0.67, Rho(max) = 0.85 e/Ang**3 (From CIF+FCF data)
# w=1/[sigma**2(Fo**2)+(0.0436P)**2+ 2.2178P], P=(Fo**2+2*Fc**2)/3
# R= 0.0326( 4758), wR2= 0.0856( 4842), S = 1.057 (From CIF+FCF data)
# R= 0.0326( 4758), wR2= 0.0856( 4842), S = 1.057 (From FCF data only)
# R= 0.0326( 4758), wR2= 0.0855( 4842), S = 1.057, Npar= 290, Flack -0.001(8)
# Number Bijvoet Pairs = 1978 ( 91%) ( 1899 Selected for: Parsons 0.003(5)
# P2(tr) 1.000, P3(tr) 1.000, P3(tw) 0.000, Student-T Nu 19.05, Hooft -0.012(6)
#=====
For Documentation: http://http://www.platonsoft.nl/CIF-VALIDATION.pdf
#=====

```

```

#=====
>>> The Following Improvement and Query ALERTS were generated - (Acta-Mode) <<<
#=====
Format: alert-number_ALERT_alert-type_alert-level text

```

```

090_ALERT_3_C Poor Data / Parameter Ratio (Zmax > 18) ..... 9.88 Note
761_ALERT_1_C CIF Contains no X-H Bonds ..... Please Check
762_ALERT_1_C CIF Contains no X-Y-H or H-Y-H Angles ..... Please Check
#=====
003_ALERT_2_G Number of Uiso or Uij Restrained non-H Atoms ... 7 Why ?
142_ALERT_4_G su on b - Axis Small or Missing ..... 0.00020 Ang.
143_ALERT_4_G su on c - Axis Small or Missing ..... 0.00020 Ang.
434_ALERT_2_G Short Inter HL..HL Contact Cl1 .. Cl3 . 3.32 Ang.
791_ALERT_4_G The Model has Chirality at C6 ..... S Verify
860_ALERT_3_G Number of Least-Squares Restraints ..... 12 Note
912_ALERT_4_G Missing # of FCF Reflections Above STh/L= 0.600 99 Note
#=====

```

ALERT\_Level and ALERT\_Type Summary

```

=====
3 ALERT_Level_C = Check. Ensure it is Not caused by an Omission or Oversight
7 ALERT_Level_G = General Info/Check that it is not Something Unexpected

2 ALERT_Type_1 CIF Construction/Syntax Error, Inconsistent or Missing Data.

```

2 ALERT\_Type\_2 Indicator that the Structure Model may be Wrong or Deficient.  
2 ALERT\_Type\_3 Indicator that the Structure Quality may be Low.  
4 ALERT\_Type\_4 Improvement, Methodology, Query or Suggestion.

#=====

2 Missing Experimental Info Issue(s) (Out of 54 Tests) - 96 % Satisfied  
0 Experimental Data Related Issue(s) (Out of 28 Tests) - 100 % Satisfied  
4 Structural Model Related Issue(s) (Out of 117 Tests) - 97 % Satisfied  
4 Unresolved or to be Checked Issue(s) (Out of 223 Tests) - 98 % Satisfied

#=====
